# Supplementary material for: Common and unique transcriptional responses to dietary restriction and loss of insulin receptor substrate 1 (IRS1) in mice
Source: Aging (Albany NY). 2018 May 20;10(5):1027–52. doi: 10.18632/aging.101446 (PMC5990393; doi:10.18632/aging.101446)
Supplement: Supplementary Table S2 [file aging-10-101446-s003.xlsx]

## Sheet: GO_KO_up.txt
GO ID	GO Term	GO Category	Total Genes	LIVER KOAL UP	SM KOAL UP	BRAIN KOAL UP	WAT KOAL UP	LIVER KOAL UP Genes	SM KOAL UP Genes	BRAIN KOAL UP Genes	WAT KOAL UP Genes
GO:0005833	hemoglobin complex	CC	7	1.48674e-09	1.83104e-09	0.00020087	1	Hba-a1;Hba-a2;Hbb-bt;Hbb-bs	Hba-a1;Hba-a2;Hbb-bt;Hbb-bs	Hba-a1;Hbb-bt
GO:0031720	haptoglobin binding	MF	7	1.31625e-09	1.98094e-09	0.000220855	1	Hbb-bt;Hba-a2;Hba-a1;Hbb-bs	Hbb-bt;Hba-a2;Hba-a1;Hbb-bs	Hbb-bt;Hba-a1
GO:0031838	haptoglobin-hemoglobin complex	CC	7	7.39824e-09	9.10905e-09	0.00020087	1	Hba-a2;Hbb-bt;Hba-a1;Hbb-bs	Hba-a2;Hbb-bt;Hba-a1;Hbb-bs	Hbb-bt;Hba-a1
GO:0070469	respiratory chain	CC	58	0.0430844	6.87579e-08	0.272111	1	Ndufs6;Ndufa2	Ndufs6;Cox6a1;Cox7a2;Ndufc2;Ndufa3;Ndufs5;Ndufc1	Cox7a2
GO:0005746	mitochondrial respiratory chain	CC	51	0.034452	7.98076e-07	0.245911	1	Ndufa2;Ndufs6	Cox6a1;Cox7a2;Ndufc2;Ndufa3;Ndufc1;Ndufs6	Cox7a2
GO:0044429	mitochondrial part	CC	534	0.236062	1.2286e-06	0.9603	0.995412	Tomm20;Ndufa2;Ndufs6;Clpx;Asl	Mrpl34;Ndufa3;Timm13;Ndufs6;Ndufs5;Cidea;Ndufc2;Ndufc1;Cox6b1;Cox7a2;Cisd1;Sfxn1;Mrps21;Cox6a1;Hspa1b	Cox7a2	Chdh;Hspa1b
GO:0005740	mitochondrial envelope	CC	428	0.123369	2.85578e-06	0.925398	0.997658	Ndufa2;Tomm20;Ndufs6;Asl;Clpx	Timm13;Mrps21;Ndufa3;Ndufc2;Ndufs6;Cidea;Ndufc1;Ndufs5;Cisd1;Sfxn1;Cox6b1;Cox6a1;Cox7a2	Cox7a2	Chdh
GO:0005743	mitochondrial inner membrane	CC	310	0.305012	4.2143e-06	0.841789	0.98685	Ndufa2;Clpx;Ndufs6	Cox6b1;Ndufc1;Timm13;Ndufa3;Ndufc2;Sfxn1;Cox6a1;Cox7a2;Ndufs5;Mrps21;Ndufs6	Cox7a2	Chdh
GO:0005615	extracellular space	CC	536	3.51072e-06	4.59771e-06	0.0777631	0.00161585	Igfbp2;Apcs;Igfbp1;Orm2;Hbb-bt;Lcn2;Hba-a1;C8b;Hbb-bs;S100a13;Fau;Mif;Hba-a2;Prdx4	Ramp1;Mmp9;Hbb-bt;Lrrc17;Lcn2;Hba-a1;Igfbp6;Hbb-bs;Hba-a2;S100a9;Ighg2b;Ppp1r1a;Car2;Alpl	Hbb-bt;Lrrc17;Hba-a1;Mfge8;Igfbp6;C1qtnf4	Hamp;Wfdc1;Ramp1;Actg2;Anpep;Dkk3;Cd9;St14;Hspa1a;Serpina1e;Tgfbi;Ighg1;Eno3;Hfe2;Ezr;Pigr;Car2;Ubn2
GO:0019866	organelle inner membrane	CC	331	0.334835	8.286e-06	0.86062	0.943812	Clpx;Ndufs6;Ndufa2	Ndufs6;Timm13;Ndufs5;Cox6a1;Ndufc1;Ndufa3;Cox6b1;Mrps21;Sfxn1;Ndufc2;Cox7a2	Cox7a2	Chdh;Lbr
GO:0031966	mitochondrial membrane	CC	403	0.102387	8.92757e-06	0.913657	0.996622	Ndufs6;Clpx;Ndufa2;Tomm20;Asl	Cox7a2;Mrps21;Ndufc2;Ndufa3;Ndufs6;Cox6a1;Cox6b1;Ndufs5;Ndufc1;Cisd1;Timm13;Sfxn1	Cox7a2	Chdh
GO:0044391	ribosomal subunit	CC	127	3.77023e-09	1.5947e-05	7.26861e-05	0.807782	Rps26;Rps5;Fau;Rps14;Rpl37a;Rpl37;Rps15;Hba-a1;Rps16;Hba-a2	Rps26;Rps29;Mrps21;Rpl37a;Mrpl34;Hba-a1;Hba-a2	Rps26;Rps29;Rpl37a;Rpl37;Hba-a1;Rpl10	Rps24
GO:0016209	antioxidant activity	MF	52	1.30043e-05	1.92366e-05	0.0322842	1	Hbb-bt;Hbb-bs;Prdx4;Hba-a2;Hba-a1	Hbb-bt;Hbb-bs;Hba-a2;Hba-a1;S100a9	Hbb-bt;Hba-a1
GO:0005840	ribosome	CC	184	1.37739e-07	2.37207e-05	0.0006273	0.913364	Hba-a1;Rpl37;Hba-a2;Rps5;Rpl37a;Rps15;Rps14;Rps16;Rps26;Fau	Rps29;Hba-a1;Hba-a2;Rpl37a;Mrpl35;Mrpl34;Mrps21;Rps26	Rps29;Hba-a1;Rpl37;Rpl10;Rpl37a;Rps26	Rps24
GO:0004601	peroxidase activity	MF	30	4.52218e-07	3.08862e-05	0.0117955	1	Hba-a1;Prdx4;Hbb-bs;Hba-a2;Hbb-bt	Hba-a1;Hbb-bs;Hba-a2;Hbb-bt	Hba-a1;Hbb-bt
GO:0016684	oxidoreductase activity, acting on peroxide as acceptor	MF	31	5.52378e-07	3.58493e-05	0.0126529	1	Hbb-bt;Hba-a1;Hba-a2;Hbb-bs;Prdx4	Hbb-bt;Hba-a1;Hba-a2;Hbb-bs	Hbb-bt;Hba-a1
GO:0015935	small ribosomal subunit	CC	64	2.91332e-09	4.36672e-05	0.00492901	0.55151	Rps5;Rps26;Hba-a2;Rps16;Hba-a1;Fau;Rps15;Rps14	Rps26;Mrps21;Hba-a2;Rps29;Hba-a1	Rps26;Rps29;Hba-a1	Rps24
GO:0031721	hemoglobin alpha binding	MF	4	3.75345e-05	4.58576e-05	0.0122328	1	Hbb-bt;Hbb-bs	Hbb-bt;Hbb-bs	Hbb-bt
GO:0031722	hemoglobin beta binding	MF	4	3.75345e-05	4.58576e-05	0.0122328	1	Hbb-bs;Hbb-bt	Hbb-bs;Hbb-bt	Hbb-bt
GO:0044445	cytosolic part	CC	156	1.09818e-10	6.0421e-05	2.9558e-05	0.627857	Rpl37a;Rpl37;Rps15;Rps14;Rps5;Rps26;Fau;Hba-a1;Hbb-bs;Hbb-bt;Hba-a2;Rps16	Rpl37a;Rps29;Rps26;Hba-a1;Hbb-bs;Hbb-bt;Hba-a2	Rpl37a;Rpl37;Rps29;Rps26;Rpl10;Hba-a1;Hbb-bt	Rps24;Eno3
GO:0005747	mitochondrial respiratory chain complex I	CC	37	0.0196029	7.29972e-05	1	1	Ndufs6;Ndufa2	Ndufs6;Ndufc2;Ndufa3;Ndufc1
GO:0030964	NADH dehydrogenase complex	CC	37	0.0196029	7.29972e-05	1	1	Ndufa2;Ndufs6	Ndufa3;Ndufs6;Ndufc1;Ndufc2
GO:0045271	respiratory chain complex I	CC	37	0.0196029	7.29972e-05	1	1	Ndufa2;Ndufs6	Ndufc2;Ndufc1;Ndufa3;Ndufs6
GO:0005739	mitochondrion	CC	1331	0.602117	7.37757e-05	0.961781	0.890396	Ndufs6;Tomm20;Ndufa2;Clpx;Prdx4;Rps14;Slc35f6;Asl	Glrx5;Ndufs6;Cisd1;Mrps21;Hspa1b;Ndufa3;Ndufs5;Cidea;Ndufc2;Mrpl35;Plin5;Dusp26;Cox6b1;Cox6a1;Timm13;Pin1;Cox7a2;Mrpl34;Ndufc1;Cyp2e1;Sfxn1	Cisd3;Zmiz2;Cox7a2;Gatc	Ppl;Hspa1a;Hspa1b;Slc27a2;Akap8;Myc;Gsta4;Esr1;Hebp2;Chdh;Atp2a1;Acot1;Lbr;Perp
GO:0022627	cytosolic small ribosomal subunit	CC	41	5.65689e-11	0.0001024	0.00129109	0.394904	Rps5;Rps14;Fau;Rps16;Rps26;Hba-a2;Hba-a1;Rps15	Rps29;Rps26;Hba-a2;Hba-a1	Rps29;Rps26;Hba-a1	Rps24
GO:0030492	hemoglobin binding	MF	4	0.000112155	0.000136965	0.0122328	1	Hbb-bs;Hbb-bt	Hbb-bs;Hbb-bt	Hbb-bt
GO:0044455	mitochondrial membrane part	CC	123	0.0366154	0.000150495	0.524508	1	Ndufs6;Ndufa2;Tomm20	Ndufs6;Cox6a1;Ndufc1;Ndufc2;Ndufa3;Cox7a2	Cox7a2
GO:0031967	organelle envelope	CC	631	0.328929	0.000189431	0.898789	0.993926	Ndufa2;Tomm20;Asl;Clpx;Ndufs6	Ndufs5;Cox6a1;Timm13;Cox7a2;Ndufa3;Mrps21;Cox6b1;Ndufs6;Ndufc1;Cisd1;Sfxn1;Ndufc2;Cidea	Cox7a2;Nupl1	Chdh;Ngfr;Lbr
GO:0031975	envelope	CC	633	0.332759	0.000195597	0.899284	0.979324	Ndufa2;Asl;Ndufs6;Tomm20;Clpx	Ndufc2;Ndufc1;Mrps21;Ndufa3;Cox7a2;Ndufs5;Cox6b1;Ndufs6;Sfxn1;Cox6a1;Cisd1;Cidea;Timm13	Cox7a2;Nupl1	Sgms2;Ngfr;Lbr;Chdh
GO:0022626	cytosolic ribosome	CC	84	4.62973e-11	0.000199512	6.85551e-06	0.663215	Rps16;Rps26;Rpl37a;Rps14;Hba-a2;Rps5;Rpl37;Hba-a1;Fau;Rps15	Rps26;Rpl37a;Rps29;Hba-a2;Hba-a1	Rps26;Rpl37a;Rps29;Rpl37;Hba-a1;Rpl10	Rps24
GO:0016491	oxidoreductase activity	MF	494	7.6786e-08	0.000201339	0.556596	0.829987	Cyp4a10;Mthfr;Hbb-bs;Hbb-bt;Fmo3;Cyp2c67;Cyp8b1;Hba-a1;Hba-a2;Cyp4a31;Cyp2c44;Cyp4a32;Cyp3a11;Prdx4;Ndufa2;Tecr	Cyp2e1;Hbb-bs;Ndufc2;Hbb-bt;Cox7a2;Msrb1;Hba-a1;Hba-a2;Cox6b1;Glrx5;Cox6a1	Hbb-bt;Cox7a2;Hba-a1	Scd4;Lbr;Alox15;Scd2;Chdh
GO:0004129	cytochrome-c oxidase activity	MF	21	1	0.00027211	0.110429	1		Cox6b1;Cox7a2;Cox6a1	Cox7a2
GO:0015002	heme-copper terminal oxidase activity	MF	21	1	0.00027211	0.110429	1		Cox6b1;Cox6a1;Cox7a2	Cox7a2
GO:0016676	oxidoreductase activity, acting on a heme group of donors, oxygen as acceptor	MF	21	1	0.00027211	0.110429	1		Cox7a2;Cox6b1;Cox6a1	Cox7a2
GO:0009055	electron carrier activity	MF	48	1	0.000283301	0.242295	1		Glrx5;Cox6b1;Cox7a2;Cox6a1	Cox7a2
GO:0016675	oxidoreductase activity, acting on a heme group of donors	MF	22	1	0.00031857	0.115896	1		Cox6a1;Cox7a2;Cox6b1	Cox7a2
GO:0015670	carbon dioxide transport	BP	6	1	0.000394802	1	0.0400485		Aqp4;Car2		Car2
GO:0019755	one-carbon compound transport	BP	7	1	0.000589768	1	0.0530408		Car2;Aqp4		Car2
GO:0010890	positive regulation of sequestering of triglyceride	BP	7	1	0.000589768	1	1		Plin5;Cidea
GO:0010883	regulation of lipid storage	BP	30	1	0.000647104	1	1		Nfkbia;Plin5;Cidea
GO:0002376	immune system process	BP	986	0.00156275	0.000804149	0.463755	0.423126	Lcn2;Egr1;Nlrp12;Mif;Apcs;Cdkn1a;Bcl6;Rps14;Igfbp2;Hba-a2;C8b;Hba-a1;Fau;Orm2	S100a9;Lcn2;H2-Q10;Ighg2b;Tbx1;Mmp9;Car2;Cdkn1a;Lrrc17;Hba-a2;Sfxn1;Msrb1;Hba-a1;Nfkbia;Aqp4	Camk4;Egr1;Lrrc17;Hba-a1;Junb;Mef2c	Enpp3;Gata2;Car2;Cd24a;Ifitm3;Id2;Myc;Ifitm1;Ctla2a;Rps24;Alox15;Pdgfra;Hamp;Ighg1;Pigr;Hoxb8;Gadd45g
GO:0015669	gas transport	BP	8	1	0.000822283	1	0.0658583		Car2;Aqp4		Car2
GO:0072562	blood microparticle	CC	77	0.000207769	0.000860267	0.0332487	0.307809	Hbb-bt;Hbb-bs;Hba-a1;Apcs;Hba-a2	Hbb-bt;Hbb-bs;Hba-a1;Hba-a2	Hbb-bt;Hba-a1	Hspa1a;Actg2
GO:0005829	cytosol	CC	995	9.19867e-07	0.00116376	0.0814972	0.0665154	Rps26;Hbb-bt;Avpr1a;Rps14;Mthfr;Fau;Rps16;Cdkn1a;Hbb-bs;Mt1;Nnmt;Rpl37;Lcn2;Rpl37a;Rps15;Hba-a1;Prdx4;Hba-a2;Rps5;S100a13	Rps26;Plin5;Hbb-bt;Car2;Thrsp;Cdkn1a;Rps29;Hbb-bs;Mt1;Nfkbia;Pin1;Lcn2;Rpl37a;Hba-a1;Hba-a2	Rps26;Mef2c;Hbb-bt;Rpl10;Cckbr;Rps29;Rpl37;Rpl37a;Gpr6;Hba-a1	Eno3;Jph2;Car2;Cd24a;Esr1;Thrsp;Id2;Alox15;Irs1;Pmvk;Rgs2;AU021092;Hspa1a;Lpar3;Rps24;Acot1;Ngfrap1;Cndp2;Ezr;Pdgfra
GO:0003735	structural constituent of ribosome	MF	122	7.91828e-05	0.00118255	0.0350176	0.796695	Fau;Rps16;Rps14;Rpl37a;Rps5;Rps15	Mrpl35;Mrps21;Rpl37a;Mrpl34;Rps29	Rpl37a;Rps29;Rpl10	Rps24
GO:0055114	oxidation-reduction process	BP	640	0.000141407	0.00411041	0.97747	0.567373	Cyp2c67;Fmo3;Cyp4a32;Cyp4a10;Ndufa2;Cyp3a11;Prdx4;Tecr;Mthfr;Ndufs6;Cyp8b1;Cyp2c44;Cyp4a31	Plin5;Ndufs5;Cyp2e1;Ndufc1;Ndufc2;Msrb1;Ppp1r1a;Ndufs6;Cisd1;Ndufa3	Adrb1	Scd4;Alox15;Myc;Pygm;Scd2;Irs1;Lbr;Slc27a2;Chdh
GO:0048821	erythrocyte development	BP	23	0.000255537	0.00850529	0.129432	1	Bcl6;Hba-a2;Hba-a1	Hba-a2;Hba-a1	Hba-a1
GO:0044421	extracellular region part	CC	2130	6.01065e-05	0.0110418	0.098825	0.00234112	Igfbp2;Mif;Apcs;S100a13;Igfbp1;Hbb-bt;Hbb-bs;Lcn2;Fau;C8b;Slc39a4;Rps26;Rps16;Hba-a2;Cyp4a31;Prdx4;Cyp4a32;Rps14;Asl;Atp6v1h;Hba-a1;Slc35f6;Tagln2;Cyp4a10;Rps5;Rpl37a;Orm2	Igfbp6;Ighg2b;Lrrc17;Cox7a2;Hbb-bt;Hbb-bs;Lcn2;Car2;Dusp26;Cisd1;Dusp23;Mmp9;Rps26;Hba-a2;Ramp1;H2-Q10;S100a9;Rps29;Ppp1r1a;Hba-a1;Rpl37a;Alpl	Igfbp6;Arpc2;Lrrc17;Cox7a2;Hbb-bt;Col6a1;Rtn4rl2;Ufc1;C1qtnf4;Cpne5;Mfge8;Naca;Rps26;Rps29;Camk4;Hba-a1;Rpl37a	Krt19;Eno3;Tmem38a;Tgfbi;Itgb4;Pmvk;Krt7;Ezr;Myh11;Dkk3;Anpep;Ppl;Actg2;Hamp;Car2;Krt8;Wfdc1;Marcksl1;Mamdc2;Cldn3;Fgl2;Cd9;Atp1a1;Slc27a2;Ighg1;Gstm7;Cndp2;Ifitm3;A4galt;Ramp1;Serpina1e;Ptpn13;St14;Des;Cdh11;Ubn2;Enpep;Hfe2;Hspa1a;AU021092;Enpp3;Spock2;Pygm;Pigr;Krt18;Hebp2
GO:0030529	ribonucleoprotein complex	CC	508	0.000256338	0.0188942	0.0760618	0.970384	Ddx39b;Rps15;Rpl37a;Hba-a1;Rps5;Rps26;Rps16;Rpl37;Hba-a2;Rps14;Fau	Mrps21;Rps29;Rpl37a;Mrpl35;Hba-a1;Rps26;Mrpl34;Hba-a2	Rpl10;Rps29;Rpl37a;Hba-a1;Rps26;Rpl37	Rps24;Jakmip1;Hspa1a
GO:0003012	muscle system process	BP	149	0.438241	0.020396	0.0682	4.55217e-08	Ndufs6	Myl3;Jsrp1;Pin1;Ndufs6	Homer1;Adrb1;Mef2c	Rgs2;Atp2a1;Tpm2;Myh11;Tpm1;Fbxo32;Tcap;Atp1a1;Actn3;Mrvi1;Tnnc2;Tnni2;Myl1
GO:0005576	extracellular region	CC	2289	2.121e-06	0.0221307	0.01943	0.00351981	Fgf21;Rps26;Hbb-bs;Rps5;Rps14;Igfbp1;Lcn2;Tagln2;Apcs;C8b;Hbb-bt;Mif;Orm2;F10;Atp6v1h;Cyp4a31;Hba-a1;Cyp4a10;Prdx4;Cyp4a32;Slc39a4;Asl;Rps16;Enho;Fau;Leap2;Slc35f6;S100a13;Hba-a2;Igfbp2;Rpl37a	Igfbp6;Rps26;Hbb-bs;Cisd1;S100a9;Mmp9;Rps29;Lcn2;Dusp23;Alpl;Hbb-bt;Lrrc17;Ramp1;H2-Q10;Hba-a1;Car2;Ppp1r1a;Ighg2b;Cox7a2;Hba-a2;Rpl37a;Dusp26	Igfbp6;Rps26;Rtn4rl2;Olfm2;Naca;Mfge8;Col6a1;Rps29;Igsf21;Prss12;Ufc1;Cpne5;Hbb-bt;C1qtnf4;Lrrc17;Hba-a1;Camk4;Dkkl1;Cox7a2;Arpc2;Rpl37a	Pmvk;Mamdc2;Krt19;Enpep;Tgfbi;Cd9;Wfdc1;Serpina1e;A4galt;Dkk3;Atp1a1;Eno3;Ppl;Anpep;Itgb4;Pigr;Cndp2;Enpp3;Slc27a2;Cdh11;Marcksl1;Spock2;Ezr;Fgl2;Ramp1;Cldn3;Myh11;Gstm7;Ptpn13;Hebp2;Tmem38a;St14;Mdk;Krt7;Pygm;Ighg1;Car2;AU021092;Hamp;Ubn2;Ifitm3;Actg2;Ctla2a;Hfe2;Krt18;Krt8;Des;Hspa1a
GO:0070062	extracellular vesicular exosome	CC	1799	0.000113268	0.0319864	0.0844804	0.0127981	Rps26;Igfbp2;Rps5;Slc39a4;Rpl37a;Lcn2;Hbb-bs;Atp6v1h;Hba-a1;S100a13;Cyp4a32;Rps16;Tagln2;Cyp4a10;Hbb-bt;Apcs;Asl;Mif;Rps14;Prdx4;C8b;Cyp4a31;Hba-a2;Slc35f6	Rps26;Car2;Mmp9;Rpl37a;Lcn2;H2-Q10;Hbb-bs;Dusp26;Alpl;Hba-a1;Igfbp6;Rps29;Cox7a2;Cisd1;Hbb-bt;S100a9;Dusp23;Hba-a2	Rps26;Rpl37a;Naca;Cpne5;Mfge8;Camk4;Col6a1;Hba-a1;Igfbp6;Rps29;Cox7a2;Hbb-bt;Rtn4rl2;Arpc2;Ufc1	Pigr;Itgb4;Cd9;Pygm;Krt7;Car2;Ezr;Anpep;Tgfbi;Marcksl1;Krt19;Eno3;Ptpn13;Slc27a2;A4galt;Krt18;AU021092;Cndp2;Myh11;Enpp3;Pmvk;St14;Actg2;Atp1a1;Krt8;Ifitm3;Hspa1a;Gstm7;Hebp2;Ppl;Serpina1e;Fgl2;Cldn3;Cdh11;Tmem38a;Enpep;Des
GO:0043230	extracellular organelle	CC	1802	0.000117499	0.0324864	0.0848047	0.0132106	Hbb-bs;Rps5;Lcn2;Slc39a4;Apcs;Cyp4a31;Mif;Hbb-bt;Rps14;S100a13;Rps26;Slc35f6;Cyp4a10;Tagln2;Cyp4a32;Asl;C8b;Rps16;Prdx4;Atp6v1h;Hba-a2;Rpl37a;Hba-a1;Igfbp2	Hbb-bs;Lcn2;Car2;Cisd1;Igfbp6;S100a9;Hbb-bt;Cox7a2;Dusp26;Rps26;Rps29;Dusp23;H2-Q10;Hba-a2;Rpl37a;Hba-a1;Alpl;Mmp9	Naca;Mfge8;Col6a1;Rtn4rl2;Cpne5;Igfbp6;Hbb-bt;Ufc1;Cox7a2;Rps26;Rps29;Arpc2;Camk4;Rpl37a;Hba-a1	Ppl;A4galt;Cd9;Tgfbi;Enpep;Eno3;St14;Car2;Itgb4;Cdh11;Krt7;Gstm7;Marcksl1;Actg2;Myh11;Cldn3;Serpina1e;Krt19;Slc27a2;Krt18;Pygm;Cndp2;Tmem38a;Pmvk;Ptpn13;Fgl2;Ezr;Ifitm3;Pigr;Enpp3;Hebp2;Atp1a1;Des;Anpep;AU021092;Hspa1a;Krt8
GO:0065010	extracellular membrane-bounded organelle	CC	1802	0.000117499	0.0324864	0.0848047	0.0132106	Hbb-bs;Slc39a4;Cyp4a32;Apcs;Igfbp2;Rps16;Mif;Slc35f6;Rps26;Hbb-bt;Cyp4a31;Atp6v1h;Prdx4;Cyp4a10;Asl;Hba-a2;S100a13;C8b;Rps14;Hba-a1;Rps5;Tagln2;Lcn2;Rpl37a	Hbb-bs;Igfbp6;Cox7a2;Rps26;Car2;Hbb-bt;H2-Q10;S100a9;Cisd1;Dusp26;Dusp23;Mmp9;Hba-a2;Hba-a1;Rps29;Lcn2;Rpl37a;Alpl	Arpc2;Ufc1;Col6a1;Igfbp6;Cox7a2;Mfge8;Rps26;Rtn4rl2;Hbb-bt;Camk4;Naca;Hba-a1;Rps29;Cpne5;Rpl37a	Tgfbi;St14;Eno3;Pigr;Slc27a2;Actg2;Anpep;Marcksl1;Krt19;Enpp3;Car2;Cd9;Pmvk;Ifitm3;Krt8;Cdh11;Fgl2;Ptpn13;Itgb4;AU021092;Enpep;Serpina1e;Hspa1a;Krt18;Cldn3;Atp1a1;Pygm;A4galt;Hebp2;Ppl;Des;Tmem38a;Cndp2;Ezr;Gstm7;Krt7;Myh11
GO:0006936	muscle contraction	BP	112	0.321507	0.0400799	0.164184	9.14524e-09	Ndufs6	Jsrp1;Myl3;Ndufs6	Homer1;Adrb1	Atp2a1;Tcap;Atp1a1;Tpm1;Myh11;Tnni2;Myl1;Actn3;Mrvi1;Tnnc2;Tpm2;Rgs2
GO:0016529	sarcoplasmic reticulum	CC	46	1	0.0423797	1	5.3134e-06		Jsrp1;S100a1		Mrvi1;Jph2;Pygm;Tmem38a;Gstm7;Atp2a1
GO:0005198	structural molecule activity	MF	279	0.00437405	0.0440795	0.0281043	2.21705e-05	Rps5;Rps15;Rps16;Fau;Rps14;Rpl37a	Mrps21;Mrpl35;Rps29;Rpl37a;Mrpl34	Arpc2;Rpl10;Homer1;Rps29;Rpl37a	Rps24;Cldn3;Myh11;Krt7;Krt19;Des;Mylpf;Pdlim3;Krt18;Tpm2;Cldn10;Tcap;Tpm1;Krt8
GO:0016528	sarcoplasm	CC	51	1	0.0504886	1	7.47988e-07		S100a1;Jsrp1		Jph2;Tmem38a;Atp2a1;Gstm7;Flnc;Mrvi1;Pygm
GO:0006941	striated muscle contraction	BP	60	1	0.0660968	0.0430012	3.09255e-07		Myl3;Jsrp1	Adrb1;Homer1	Tnni2;Atp2a1;Tpm1;Myl1;Tcap;Rgs2;Tnnc2;Atp1a1
GO:0001501	skeletal system development	BP	242	1	0.0697266	0.183471	0.000909691		Tbx1;Mmp9;Alpl;Lrrc17	Dym;Mef2c;Lrrc17	Msx1;Hoxd9;Osr2;Pdgfra;Hoxb8;Insig1;Hoxa11;Ror2;Pkdcc;Myc;Hoxa10
GO:0003008	system process	BP	609	0.323432	0.0747539	0.033036	1.76117e-06	Ndufs6;Mif;Egr1;Avpr1a	Ndufs6;Tbx1;S100a1;Pin1;Jsrp1;Myl3;Aqp4	Egr1;Camk4;Mef2c;Gpr88;Sobp;Cckbr;Homer1;Adrb1;Chrm1	Pigr;Atp2a1;Atp1a1;Tpm1;Myh11;Hopx;Enpep;Id2;Ier3;Ngfr;Mrvi1;Myl1;Mdk;Jakmip1;Anpep;Actn3;Tnni2;Fbxo32;Tpm2;Tcap;Hoxb8;Tnnc2;Myc;Rgs2
GO:0055080	cation homeostasis	BP	272	0.0481214	0.0782655	0.546672	8.00795e-06	Slc39a4;Avpr1a;Mt1;Lcn2	Car2;Mt1;Lcn2;Sfxn1	Cckbr;Gpr6	Hfe2;Gstm7;Myc;Car2;Atp1a1;Rab20;Pygm;Hamp;Pdgfra;Jph2;Atp2a1;Esr1;Lpar3;Cd24a;Anpep
GO:0031988	membrane-bounded vesicle	CC	2086	0.00032112	0.101487	0.164019	0.0258057	Hbb-bs;Tagln2;Chic2;Slc39a4;Asl;C8b;Rps16;Lcn2;Apcs;Mif;Rps26;Hba-a1;Rpl37a;Rps5;Hbb-bt;Slc35f6;S100a13;Cyp4a31;Igfbp2;Rps14;Cyp4a10;Atp6v1h;Hba-a2;Prdx4;Cyp4a32	Hbb-bs;S100a9;Igfbp6;Lcn2;Cox7a2;Cisd1;Rps26;H2-Q10;Dusp26;Hba-a1;Rps29;Rpl37a;Alpl;Hbb-bt;Car2;Mmp9;Hba-a2;Dusp23	Cpne5;Igfbp6;Rtn4rl2;Cox7a2;Brsk1;Rps26;Hba-a1;Rps29;Rpl37a;Col6a1;Hbb-bt;Naca;Mfge8;Arpc2;Ufc1;Camk4	Enpep;Tgfbi;Cldn3;Anpep;Serpina1e;Eno3;Atp1a1;Ezr;Hspa1a;Pigr;Myh11;Itgb4;Pygm;Cdh11;Rab20;Marcksl1;Ngfr;Enpp3;Tmem38a;Ptpn13;Krt19;Des;Krt8;Car2;Pmvk;Gstm7;Cd9;Hebp2;Cndp2;Actg2;Krt7;St14;Ifitm3;Fgl2;Krt18;A4galt;Sec23b;Slc27a2;AU021092;Ppl
GO:0045844	positive regulation of striated muscle tissue development	BP	18	1	0.108777	0.000158355	0.195968		Pin1	Mef2c;Naca;Adrb1	Sox17
GO:0048636	positive regulation of muscle organ development	BP	18	1	0.108777	0.000158355	0.195968		Pin1	Naca;Mef2c;Adrb1	Sox17
GO:0050801	ion homeostasis	BP	312	0.0750252	0.114125	0.622689	8.68733e-06	Mt1;Lcn2;Avpr1a;Slc39a4	Car2;Mt1;Lcn2;Sfxn1	Gpr6;Cckbr	Anpep;Atp2a1;Hamp;Car2;Pygm;Rab20;Ngfr;Esr1;Myc;Hfe2;Jph2;Atp1a1;Lpar3;Gstm7;Cd24a;Pdgfra
GO:0030890	positive regulation of B cell proliferation	BP	20	0.000158808	0.114466	0.0973527	1	Mif;Cdkn1a;Bcl6	Cdkn1a	Mef2c
GO:1901863	positive regulation of muscle tissue development	BP	18	1	0.114466	0.00018724	0.195968		Pin1	Adrb1;Mef2c;Naca	Sox17
GO:0042474	middle ear morphogenesis	BP	20	1	0.114466	1	6.68164e-05		Tbx1		Msx1;Osr2;Myc;Insig1
GO:0016709	oxidoreductase activity, acting on paired donors, with incorporation or reduction of molecular oxygen, NAD(P)H as one donor, and incorporation of one atom of oxygen	MF	26	9.61335e-07	0.116019	1	1	Cyp4a31;Cyp8b1;Fmo3;Cyp4a32;Cyp4a10	Cyp2e1
GO:0016323	basolateral plasma membrane	CC	95	1	0.117119	0.448579	0.00049817		Car2;Aqp4	Palm	St14;Car2;Hspa1a;Itgb4;Atp1a1;Hfe2;Ezr
GO:0031674	I band	CC	76	1	0.119315	0.325842	2.25795e-11		S100a1;Myl3	Homer1	Krt19;Krt8;Jph2;Atp2a1;Tcap;Pdlim3;Actn3;Pygm;Ldb3;Des;Fbxo32;Pgm5
GO:0060047	heart contraction	BP	89	0.300568	0.1205	0.473306	0.000684759	Avpr1a	Myl3;S100a1	Adrb1	Rgs2;Tcap;Tpm1;Myl1;Atp1a1;Hopx
GO:0003015	heart process	BP	90	0.300568	0.1205	0.476497	0.000684759	Avpr1a	S100a1;Myl3	Adrb1	Atp1a1;Myl1;Tcap;Hopx;Tpm1;Rgs2
GO:0003009	skeletal muscle contraction	BP	16	1	0.131319	0.0527623	0.000488397		Jsrp1	Homer1	Atp2a1;Tnnc2;Tnni2
GO:0048878	chemical homeostasis	BP	461	0.248791	0.135337	0.355759	0.000843061	Mt1;Avpr1a;Slc39a4;Lcn2	Mt1;Aqp4;Car2;Lcn2;Sfxn1	Homer1;Adrb1;Gpr6;Cckbr	Esr1;Lpar3;Hfe2;Cd24a;Myc;Ngfr;Car2;Rab20;Jph2;Gstm7;Atp1a1;Atp2a1;Pdgfra;Hamp;Pygm;Anpep
GO:0044057	regulation of system process	BP	212	0.627236	0.142128	0.191041	0.000482217	Avpr1a	S100a1;Myl3;Pin1	Adrb1;Cckbr;Mef2c	Ngfr;Anpep;Mrvi1;Tnni2;Rgs2;Atp1a1;Fbxo32;Atp2a1;Hopx;Tpm1
GO:0006631	fatty acid metabolic process	BP	218	0.000313377	0.143607	1	0.00391209	Ndufs6;Cyp4a10;Mif;Tecr;Avpr1a;Cyp4a32;Cyp4a31	Plin5;Ndufs6;Elovl6		Slc27a2;Scd4;Alox15;Irs1;Acss2;Acot1;Elovl6;Insig1;Scd2
GO:0051239	regulation of multicellular organismal process	BP	1269	0.504133	0.14483	0.120147	0.000448343	Nlrp12;Apcs;Mif;Prdx4;Bcl6;Egr1;Avpr1a	Car2;Tbx1;Nfkbia;Lrrc17;Tmem100;S100a1;Cidea;Myl3;Aqp4;Pin1;Mmp9	Cckbr;Plxnd1;Palm;Lrrc7;Adrb1;Lrrc17;Sipa1l1;Mef2c;Fezf2;Egr1;Naca;Tbr1	Cd24a;Gata2;Car2;Dact3;Hopx;Ctla2a;Atp1a1;Tead3;Lpar3;Ror2;Id2;Ngfr;Myc;Fbxo32;Hoxa11;Hoxb8;Msx1;Osr2;Anpep;Wt1;Rgs2;Tpm1;Sox17;Efnb2;Plac8;Mrvi1;Jph2;Atp2a1;Pkdcc;Pdgfra;Fzd6;Tnni2;Esr1
GO:0031982	vesicle	CC	2232	0.000345785	0.161718	0.105026	0.0447953	Tagln2;Mif;Hbb-bs;Apcs;Avpr1a;Chic2;Asl;C8b;Hbb-bt;Rps16;Hba-a1;Rps5;Slc39a4;Rps26;Atp6v1h;Lcn2;Rpl37a;Hba-a2;S100a13;Cyp4a31;Prdx4;Cyp4a10;Igfbp2;Rps14;Slc35f6;Cyp4a32	Hbb-bs;Cox7a2;Hbb-bt;Cisd1;Hba-a1;Rps29;Car2;H2-Q10;Rps26;Lcn2;Rpl37a;Alpl;Hba-a2;Dusp23;Igfbp6;S100a9;Mmp9;Dusp26	Naca;Camk4;Col6a1;Rtn4rl2;Cpne5;Cox7a2;Hbb-bt;Hba-a1;Arpc2;Prss12;Rps29;Brsk1;Ufc1;Rps26;Rpl37a;Arc;Mfge8;Igfbp6	Cldn3;St14;Serpina1e;Tgfbi;Ppl;Krt19;Eno3;A4galt;Cdh11;Pygm;Enpp3;Atp1a1;Pigr;Ifitm3;Myh11;Ezr;Car2;Marcksl1;Arrdc2;Anpep;Pmvk;Enpep;Krt7;Cndp2;Itgb4;Ngfr;Des;Hebp2;Cd9;Sec23b;Fgl2;Tmem38a;Hspa1a;Actg2;Krt18;Gstm7;Rab20;Ptpn13;AU021092;Slc27a2;Krt8
GO:0007517	muscle organ development	BP	195	0.613246	0.164838	0.00127322	2.5759e-06	Egr1	Pin1;Tbx1;Myl3	Mef2c;Adrb1;Nr4a1;Naca;Egr1;Homer1	Myc;Hoxd9;Sox17;Wt1;Mylpf;Efnb2;Tpm1;Bcl9;Jph2;Msx1;Tcap;Asb2;Des
GO:0030888	regulation of B cell proliferation	BP	30	0.000610854	0.169426	0.134668	0.458959	Cdkn1a;Mif;Bcl6	Cdkn1a	Mef2c	Cd24a
GO:0048738	cardiac muscle tissue development	BP	108	1	0.177761	0.135064	0.000111705		Pin1;Myl3	Adrb1;Mef2c	Pdgfra;Wt1;Tcap;Myh11;Id2;Tpm1;Efnb2;Jph2
GO:0055065	metal ion homeostasis	BP	249	0.033628	0.178962	0.494397	4.85897e-05	Lcn2;Mt1;Avpr1a;Slc39a4	Lcn2;Mt1;Sfxn1	Gpr6;Cckbr	Myc;Hfe2;Atp1a1;Pdgfra;Hamp;Atp2a1;Gstm7;Pygm;Jph2;Lpar3;Esr1;Anpep;Cd24a
GO:0042475	odontogenesis of dentin-containing tooth	BP	38	1	0.185249	1	0.000148547		Tbx1		Perp;Ngfr;Msx1;Pdgfra;Itgb4
GO:0048705	skeletal system morphogenesis	BP	122	1	0.18693	0.522137	5.45266e-05		Tbx1;Alpl	Mef2c	Osr2;Insig1;Hoxb8;Hoxd9;Msx1;Ror2;Pdgfra;Myc;Hoxa11
GO:0044699	single-organism process	BP	6804	0.0168896	0.187124	0.373919	9.01026e-06	Clpx;Igfbp1;Slc39a4;Tagln2;Atp6v1h;Asl;Ccnf;Cyp2c67;Nlrp12;Gadd45b;Prdx4;Ndufa2;Rps14;Fgf21;Fmo3;Cyp8b1;C8b;Avpr1a;Cdkn1a;Apcs;Cyp4a32;Egr1;Rps15;Socs3;Cyp3a11;Mt1;Hba-a1;Ddx39b;Ipo13;Lcn2;Ndufs6;Cyp2c44;Tomm20;F10;Cyp4a10;Mthfr;Ces2a;Bcl6;Cyp4a31;Mif;Chic2;Igfbp2;Tecr;Slc35f6;Hba-a2;S100a13	Mmp9;S100a9;Ppan;Cidea;Myl3;S100a1;Cisd1;Car2;Tmem100;Tbx1;Lmod1;Ndufs5;Fxyd6;Aqp4;Elovl6;Alpl;Cdkn1a;Nfkbia;Glrx5;Ramp1;Pin1;Lrrc17;Igfbp6;Thrsp;Jsrp1;Hspa1b;Mt1;Hba-a1;Sbk2;Sfxn1;Ighg2b;Cyp2e1;Plin5;Ppp1r1a;Lcn2;Ndufs6;Csad;Ndufc2;Msrb1;H2-Q10;Usp15;Ndufa3;Dusp26;Ndufc1;Hba-a2	Nr4a1;Plxnd1;Gas7;Cckbr;Adrb1;Adcy2;Brsk1;Kcnh3;Ano3;Elmod1;Palm;Mef2c;Arhgap33;Lrrc7;Sipa1l1;Tbr1;Arc;Ecd;Prss12;Chrm1;Ldb2;Sobp;Npas4;Col6a1;Egr1;Arpc2;Homer1;Lrrc17;Igfbp6;Rtn4rl2;Camk4;Git1;Gpr88;Dkkl1;Mfge8;Hba-a1;Gpr6;Junb;Fezf2;Olfm2;Supt5;Cdhr1;Vipr1;Naca;Gatc;Dym	Ror2;Cdh11;Hoxa11;Pgm5;Insig1;Cd24a;Scd2;Rhpn2;Hamp;Pmvk;Tpm1;Tead3;Dact3;Cnn1;Id2;Hoxd9;Gadd45g;Rgs2;Car2;Marcksl1;Emx2;Emb;Wt1;Lmod1;A4galt;Ifitm1;Ngfrap1;Sox17;Enpep;Tmem38a;Myh11;Flnc;Mamdc2;Osr2;Fxyd6;Pygm;Fzd6;Rgl3;Perp;Myc;Dkk3;Acss2;Krt8;Bcl9;Ier3;Pdlim3;Hopx;Tcap;Aspg;Elovl6;Lbr;Efnb2;Lpar3;Irs1;St14;Akap8;Jakmip1;Sgms2;Ldb3;Atp1a1;Hfe2;Msx1;Ngfr;Krt19;Tnni2;Ramp1;Rev3l;Scd4;Slc27a2;Chdh…
GO:0050871	positive regulation of B cell activation	BP	34	0.000995837	0.195632	0.165439	1	Cdkn1a;Bcl6;Mif	Cdkn1a	Mef2c
GO:0030017	sarcomere	CC	102	1	0.196342	0.0919391	1.24436e-14		Myl3;S100a1	Mef2c;Homer1	Atp2a1;Ldb3;Des;Krt19;Tnni2;Pdlim3;Pgm5;Actn3;Tpm1;Tcap;Krt8;Tpm2;Fbxo32;Jph2;Pygm;Tnnc2
GO:0014706	striated muscle tissue development	BP	216	0.655864	0.201568	0.00201611	1.69536e-06	Egr1	Pin1;Myl3;Tbx1	Homer1;Mef2c;Egr1;Naca;Nr4a1;Adrb1	Hoxd9;Mylpf;Wt1;Tpm1;Jph2;Bcl9;Efnb2;Pdgfra;Id2;Tcap;Myc;Myh11;Sox17;Asb2
GO:0007338	single fertilization	BP	38	1	0.21601	0.190256	1.07212e-05		Hspa1b	Mfge8	Hoxa11;Wt1;Hoxa10;Hoxd9;Hspa1b;Cd9
GO:0060537	muscle tissue development	BP	227	0.676405	0.219792	0.00251973	3.00659e-06	Egr1	Pin1;Tbx1;Myl3	Homer1;Mef2c;Naca;Nr4a1;Adrb1;Egr1	Mylpf;Tpm1;Wt1;Hoxd9;Tcap;Efnb2;Myh11;Jph2;Myc;Bcl9;Pdgfra;Asb2;Sox17;Id2
GO:0055082	cellular chemical homeostasis	BP	278	0.166554	0.223143	0.567923	0.000168862	Slc39a4;Mt1;Avpr1a	Car2;Aqp4;Mt1	Gpr6;Cckbr	Jph2;Pdgfra;Car2;Lpar3;Pygm;Rab20;Atp1a1;Hamp;Atp2a1;Esr1;Gstm7;Myc;Cd24a
GO:0044449	contractile fiber part	CC	114	1	0.2233	0.110329	5.46593e-15		S100a1;Myl3	Homer1;Mef2c	Fbxo32;Tcap;Krt19;Krt8;Pdlim3;Des;Ldb3;Jph2;Actn3;Pygm;Tnni2;Atp2a1;Pgm5;Tnnc2;Myh11;Tpm2;Tpm1
GO:0004497	monooxygenase activity	MF	72	1.23434e-07	0.239932	1	1	Cyp2c44;Cyp3a11;Cyp8b1;Cyp2c67;Cyp4a31;Fmo3;Cyp4a10;Cyp4a32	Cyp2e1
GO:0060048	cardiac muscle contraction	BP	43	1	0.240769	0.233108	0.000148547		Myl3	Adrb1	Rgs2;Myl1;Tpm1;Atp1a1;Tcap
GO:0030016	myofibril	CC	120	1	0.250542	0.11986	1.35334e-14		S100a1;Myl3	Mef2c;Homer1	Fbxo32;Krt8;Pgm5;Ldb3;Actn3;Des;Krt19;Tpm1;Atp2a1;Jph2;Tnnc2;Tcap;Myl1;Tnni2;Pygm;Pdlim3;Tpm2
GO:0042476	odontogenesis	BP	52	1	0.255253	1	7.54488e-05		Tbx1		Perp;Msx1;Pdgfra;Osr2;Itgb4;Ngfr
GO:0003779	actin binding	MF	258	0.729993	0.259438	0.0786658	0.000716483	Tagln2	Lmod1;Myl3;Msrb1	Arpc2;Gas7;Arc;Sipa1l1	Flnc;Cnn1;Tpm2;Myh11;Actn3;Tpm1;Ezr;Tnni2;Lmod1;Marcksl1;Tnnc2
GO:0043009	chordate embryonic development	BP	410	0.374657	0.263187	0.470701	0.000881082	Hba-a1;Socs3;Hba-a2	Tbx1;Hba-a1;Tmem100;Hba-a2	Junb;Hba-a1;Mef2c	Fzd6;Krt19;Hoxd9;Gata2;Ifitm1;Tpm1;Osr2;Hoxa11;Sox17;Ror2;Hoxb8;Msx1;Hopx;Pdgfra;Krt8
GO:0009792	embryo development ending in birth or egg hatching	BP	414	0.38127	0.268857	0.47693	0.00096585	Hba-a1;Socs3;Hba-a2	Tbx1;Tmem100;Hba-a1;Hba-a2	Hba-a1;Junb;Mef2c	Ror2;Ifitm1;Hopx;Tpm1;Fzd6;Hoxb8;Hoxa11;Gata2;Msx1;Hoxd9;Pdgfra;Krt19;Osr2;Sox17;Krt8
GO:0050671	positive regulation of lymphocyte proliferation	BP	54	0.000240149	0.269465	0.251428	0.610503	Igfbp2;Bcl6;Mif;Cdkn1a	Cdkn1a	Mef2c	Cd24a
GO:0032946	positive regulation of mononuclear cell proliferation	BP	54	0.000258998	0.274143	0.25594	0.615806	Cdkn1a;Igfbp2;Mif;Bcl6	Cdkn1a	Mef2c	Cd24a
GO:0043292	contractile fiber	CC	130	1	0.275408	0.137504	3.74521e-15		Myl3;S100a1	Mef2c;Homer1	Krt8;Krt19;Atp2a1;Des;Jph2;Tcap;Pgm5;Pdlim3;Actn3;Fbxo32;Ldb3;Myh11;Pygm;Tnni2;Myl1;Tnnc2;Tpm1;Tpm2
GO:0070665	positive regulation of leukocyte proliferation	BP	56	0.000278888	0.28341	0.264884	0.626198	Bcl6;Cdkn1a;Mif;Igfbp2	Cdkn1a	Mef2c	Cd24a
GO:0048704	embryonic skeletal system morphogenesis	BP	48	1	0.28341	0.237729	0.000856119		Tbx1	Mef2c	Hoxa11;Hoxd9;Osr2;Pdgfra;Hoxb8
GO:0008610	lipid biosynthetic process	BP	317	0.301558	0.284932	1	0.000547735	Mif;Avpr1a;Tecr	Thrsp;Plin5;Elovl6		Alox15;A4galt;Sgms2;Thrsp;Elovl6;Acss2;Slc27a2;Pmvk;Atp1a1;Insig1;Scd4;Dkk3;Scd2
GO:0032787	monocarboxylic acid metabolic process	BP	314	0.000754524	0.286677	1	0.00144491	Cyp4a10;Cyp4a32;Ndufs6;Mif;Cyp4a31;Avpr1a;Prdx4;Tecr	Elovl6;Ndufs6;Plin5		Scd4;Elovl6;Alox15;Ier3;Slc27a2;Irs1;Insig1;Eno3;Myc;Scd2;Acot1;Acss2
GO:0051146	striated muscle cell differentiation	BP	146	1	0.288058	0.011145	5.02626e-07		Pin1;Tbx1	Homer1;Mef2c;Adrb1;Naca	Bcl9;Efnb2;Krt19;Msx1;Flnc;Pdgfra;Myh11;Wt1;Tcap;Ldb3;Hopx;Krt8
GO:0009566	fertilization	BP	56	1	0.292561	0.278102	0.000125834		Hspa1b	Mfge8	Hoxa11;Wt1;Hoxd9;Cd9;Hoxa10;Hspa1b
GO:0042471	ear morphogenesis	BP	56	1	0.292561	0.324595	1.21772e-05		Tbx1	Sobp	Gata2;Insig1;Myc;Msx1;Ror2;Osr2;Fzd6
GO:0044707	single-multicellular organism process	BP	2898	0.265256	0.293631	0.00873258	3.48718e-07	Asl;Rps15;Ndufs6;Ccnf;Prdx4;Egr1;Mif;Bcl6;Hba-a1;Apcs;Rps14;Socs3;Avpr1a;Gadd45b;Hba-a2;F10;Nlrp12;S100a13	Mmp9;Tbx1;Tmem100;Ndufs6;Aqp4;Car2;S100a1;Pin1;Myl3;Lrrc17;Hspa1b;Ighg2b;Hba-a1;Nfkbia;Ramp1;Cidea;Hba-a2;Jsrp1;Alpl;Sfxn1	Plxnd1;Mef2c;Cckbr;Ldb2;Junb;Adrb1;Rtn4rl2;Mfge8;Brsk1;Lrrc7;Egr1;Cdhr1;Gas7;Naca;Lrrc17;Chrm1;Hba-a1;Sipa1l1;Fezf2;Tbr1;Nr4a1;Dym;Arc;Sobp;Gpr88;Palm;Homer1;Camk4;Col6a1	Enpep;Hoxd9;Mdk;Wt1;Ppl;Sox17;Hoxa11;Msx1;Emx2;Hoxa10;Ifitm1;Ror2;Tnni2;Id2;Gata2;Ier3;Car2;Dact3;Fzd6;Rgs2;Cdh11;Insig1;Ngfr;Hopx;Anpep;Mrvi1;Osr2;Jakmip1;Itgb4;Efnb2;Cd24a;Pkdcc;Myh11;Hspa1b;Cd9;Plac8;Perp;Atp1a1;Tnnc2;Bcl9;Myl1;Pigr;Atp2a1;Myc;Dkk3;Tcap;Ramp1;Ctla2a;Fbxo32;Gadd45g;Krt8;Jph2;Pdgfra;Irs1;St14;Tpm1;Des;Celsr2;Pdlim3;Esr1;Mylpf;Alox15;Krt19;Actn3;Hoxb8;Tead3;Lpar3;Asb2;Tpm2;Ighg1
GO:0007507	heart development	BP	283	1	0.293667	0.093554	0.000699622		Pin1;Tbx1;Myl3	Adrb1;Mef2c;Naca;Plxnd1	Wt1;Tpm1;Sox17;Tcap;Hopx;Id2;Efnb2;Jph2;Pdgfra;Myh11;Pdlim3;Msx1
GO:0098590	plasma membrane region	CC	190	0.00751994	0.320039	0.342285	0.000100211	Slc39a4;Igfbp2;Cyp4a31;Cyp4a10;Cyp4a32	Car2;Aqp4	Cdhr1;Palm	Enpep;Cd9;Ezr;Car2;St14;Itgb4;Atp1a1;Fzd6;Cd24a;Hfe2;Hspa1a
GO:0032501	multicellular organismal process	BP	2960	0.300209	0.332027	0.011618	8.48453e-07	Asl;Hba-a2;Avpr1a;Nlrp12;Egr1;F10;Socs3;Bcl6;Apcs;Mif;Ndufs6;Hba-a1;Gadd45b;Prdx4;Ccnf;S100a13;Rps15;Rps14	Tmem100;Tbx1;Ramp1;Hba-a2;Mmp9;Alpl;Sfxn1;Car2;Myl3;Hspa1b;Cidea;Lrrc17;Ighg2b;Pin1;Ndufs6;Hba-a1;Aqp4;Jsrp1;S100a1;Nfkbia	Adrb1;Sipa1l1;Nr4a1;Ldb2;Cdhr1;Camk4;Egr1;Lrrc7;Cckbr;Rtn4rl2;Brsk1;Mfge8;Gas7;Plxnd1;Naca;Mef2c;Lrrc17;Tbr1;Col6a1;Chrm1;Homer1;Sobp;Gpr88;Hba-a1;Palm;Dym;Junb;Fezf2;Arc	Tnni2;Krt8;Ramp1;Ifitm1;Cdh11;Wt1;Fzd6;Atp1a1;Ctla2a;Dact3;Ppl;Atp2a1;Hopx;Mdk;Myc;Ror2;Myh11;Hoxd9;Enpep;Msx1;Pigr;Pdgfra;Osr2;Cd9;Hoxa11;Esr1;Plac8;Jakmip1;Ier3;Car2;Rgs2;Gadd45g;Irs1;Cd24a;Gata2;Id2;Insig1;Emx2;Hspa1b;Krt19;Ngfr;Hoxa10;Mrvi1;Itgb4;Celsr2;Perp;Anpep;Myl1;Fbxo32;Sox17;Tnnc2;Tpm1;Hoxb8;St14;Mylpf;Pdlim3;Ighg1;Alox15;Asb2;Pkdcc;Jph2;Efnb2;Bcl9;Dkk3;Tead3;Tpm2;Tcap;Lpar3;Des;Actn3
GO:0044425	membrane part	CC	2974	0.531832	0.334583	0.135786	0.000136079	Ndufa2;Tecr;Ndufs6;Cyp4a31;Cyp4a10;Atp6v1h;Fmo3;Slc39a4;Avpr1a;Cyp8b1;St7;Cyp4a32;Slc35f6;Tomm20;Cyp3a11;Igfbp2;C8b	Tspan13;Cisd1;Cox7a2;Elovl6;Ndufs6;Ndufs5;Sfxn1;Car2;Fxyd6;Aqp4;Ndufa3;Tmem100;H2-Q10;Cyp2e1;Alpl;Ndufc2;Ramp1;Yif1b;Cox6a1;Ndufc1	Ano3;Plxnd1;Rtn4rl2;Palm;Chrm1;Cox7a2;Fam163b;Olfm2;Cckbr;Cdhr1;Adcy2;Hs3st2;Lrrc7;Adrb1;Mfge8;Gpr88;Nupl1;Vipr1;Sipa1l1;Homer1;Ephx4;Gpr6;1810055G02Rik;Kcnh3;Arc	Cldn3;Ppl;Mpzl1;A4galt;Insig1;Alox15;Enpep;Cd24a;Pgm5;Efnb2;Rgs2;St14;Ifitm1;Celsr2;Ezr;Elovl6;Lzts3;Atp2a1;Scd2;Atp1a1;Sgms2;Pigr;Ctxn1;Car2;Parm1;Perp;Cd9;Fzd6;Mrvi1;Anpep;Cdh11;Scd4;Emb;Krt8;Jakmip1;Itgb4;Fxyd6;Irs1;Tmem38a;Slc15a5;B930041F14Rik;Lpar3;Jph2;Slc27a2;Slc2a12;Ier3;Ror2;Pdgfra;Ifitm3;Ramp1;Hfe2;Lbr;Spint2;Esr1;Ighg1;Krt19;Ngfr;Enpp3;Tmem158;Sec23b;Hspa1a;Cldn10;Ttc9
GO:0055007	cardiac muscle cell differentiation	BP	57	1	0.340871	0.0402078	0.000786761		Pin1	Adrb1;Mef2c	Tcap;Pdgfra;Wt1;Efnb2;Myh11
GO:0048731	system development	BP	2039	0.383334	0.346291	0.00293445	1.33323e-05	Ndufs6;Prdx4;Socs3;Egr1;Rps14;Ccnf;Apcs;Mif;Asl;Bcl6;Hba-a2;Hba-a1	Ramp1;Mmp9;Lrrc17;Tbx1;Ndufs6;Myl3;Nfkbia;Pin1;Hba-a2;Tmem100;Hba-a1;Sfxn1;Car2;Alpl	Lrrc7;Rtn4rl2;Tbr1;Nr4a1;Sipa1l1;Brsk1;Lrrc17;Cckbr;Mfge8;Fezf2;Adrb1;Egr1;Ldb2;Mef2c;Gas7;Camk4;Junb;Plxnd1;Homer1;Naca;Sobp;Hba-a1;Dym;Palm	Hoxa11;Efnb2;St14;Ramp1;Ngfr;Cdh11;Wt1;Pdgfra;Krt8;Ror2;Emx2;Anpep;Celsr2;Gata2;Perp;Ppl;Myc;Fzd6;Hoxa10;Id2;Dact3;Sox17;Hoxd9;Enpep;Ctla2a;Msx1;Pdlim3;Tcap;Irs1;Myh11;Asb2;Osr2;Lpar3;Krt19;Itgb4;Insig1;Alox15;Hopx;Cd9;Gadd45g;Pkdcc;Tpm1;Cd24a;Jph2;Des;Mdk;Car2;Hoxb8;Esr1;Mylpf;Bcl9
GO:0008015	blood circulation	BP	195	0.243984	0.349152	0.746961	0.000429574	Mif;Avpr1a	S100a1;Myl3	Adrb1	Ier3;Atp1a1;Myl1;Mrvi1;Tpm1;Id2;Rgs2;Tcap;Hopx;Enpep
GO:0003013	circulatory system process	BP	196	0.246221	0.351474	0.750051	0.000446561	Mif;Avpr1a	Myl3;S100a1	Adrb1	Atp1a1;Mrvi1;Tpm1;Rgs2;Id2;Hopx;Tcap;Myl1;Ier3;Enpep
GO:0007186	G-protein coupled receptor signaling pathway	BP	260	0.676405	0.365349	5.01062e-05	0.069452	Avpr1a	Ramp1;Car2	Palm;Homer1;Adcy2;Git1;Adrb1;Gpr6;Chrm1;Vipr1;Cckbr;Gpr88	Rgs2;Ramp1;Fzd6;Esr1;Car2;Lpar3;Celsr2
GO:0030003	cellular cation homeostasis	BP	226	0.0965379	0.385955	0.454869	2.09956e-05	Avpr1a;Mt1;Slc39a4	Car2;Mt1	Gpr6;Cckbr	Atp1a1;Jph2;Gstm7;Pdgfra;Atp2a1;Car2;Esr1;Hamp;Lpar3;Myc;Rab20;Pygm;Cd24a
GO:0006873	cellular ion homeostasis	BP	230	0.10263	0.395026	0.466909	2.50108e-05	Mt1;Avpr1a;Slc39a4	Car2;Mt1	Cckbr;Gpr6	Car2;Cd24a;Esr1;Hamp;Atp2a1;Jph2;Gstm7;Myc;Pygm;Atp1a1;Lpar3;Pdgfra;Rab20
GO:0061061	muscle structure development	BP	318	0.796458	0.397046	0.0129519	1.47764e-08	Egr1	Pin1;Tbx1;Myl3	Mef2c;Nr4a1;Homer1;Naca;Egr1;Adrb1	Wt1;Msx1;Des;Mylpf;Krt8;Hopx;Ldb3;Bcl9;Myh11;Tpm1;Hoxd9;Pdgfra;Flnc;Efnb2;Myc;Sox17;Tcap;Asb2;Jph2;Krt19
GO:0004930	G-protein coupled receptor activity	MF	106	0.372848	0.398552	0.000493541	0.080285	Avpr1a	Ramp1	Chrm1;Adrb1;Vipr1;Gpr6;Cckbr;Gpr88	Fzd6;Lpar3;Celsr2;Ramp1
GO:0030018	Z disc	CC	67	1	0.404723	0.3138	1.31488e-10		S100a1	Homer1	Ldb3;Fbxo32;Krt19;Krt8;Pygm;Tcap;Des;Actn3;Pgm5;Jph2;Pdlim3
GO:0042692	muscle cell differentiation	BP	197	1	0.406281	0.0300076	2.72515e-06		Tbx1;Pin1	Mef2c;Naca;Adrb1;Homer1	Ldb3;Hopx;Efnb2;Pdgfra;Krt8;Flnc;Asb2;Msx1;Myh11;Tcap;Krt19;Wt1;Bcl9
GO:0035051	cardiocyte differentiation	BP	74	1	0.416783	0.0660651	0.000385478		Pin1	Mef2c;Adrb1	Sox17;Efnb2;Tcap;Pdgfra;Wt1;Myh11
GO:2000027	regulation of organ morphogenesis	BP	90	1	0.435285	0.443711	5.69154e-06		Tbx1	Naca	Sox17;Wt1;Hoxa11;Ngfr;Msx1;Esr1;Fzd6;Myc;Ror2
GO:0008092	cytoskeletal protein binding	MF	485	0.92298	0.437362	0.227141	3.11209e-05	Tagln2	Myl3;Lmod1;S100a9;Msrb1	Arc;Brsk1;Arpc2;Gas7;Sipa1l1	Tnni2;Lmod1;Flnc;Ezr;Tpm1;Tpm2;Actn3;Arl4c;Atp1a1;Tcap;Ldb3;Pdlim3;Cnn1;Rgs2;Marcksl1;Des;Jakmip1;Tnnc2;Myh11
GO:0048513	organ development	BP	1483	0.262921	0.440061	0.0127163	3.69364e-07	Apcs;Socs3;Egr1;Ccnf;Hba-a2;Bcl6;Rps14;Asl;Hba-a1;Prdx4	Tbx1;Car2;Lrrc17;Hba-a2;Myl3;Pin1;Alpl;Sfxn1;Nfkbia;Hba-a1	Naca;Plxnd1;Fezf2;Camk4;Egr1;Cckbr;Lrrc17;Tbr1;Mef2c;Adrb1;Nr4a1;Sobp;Dym;Ldb2;Homer1;Hba-a1;Junb	Sox17;St14;Osr2;Esr1;Gata2;Car2;Efnb2;Hoxa11;Irs1;Id2;Celsr2;Insig1;Tcap;Wt1;Ppl;Pdgfra;Krt19;Ngfr;Mdk;Emx2;Cd24a;Itgb4;Hopx;Dact3;Mylpf;Ror2;Msx1;Hoxa10;Ctla2a;Tpm1;Asb2;Pkdcc;Myc;Hoxd9;Hoxb8;Bcl9;Pdlim3;Des;Jph2;Gadd45g;Fzd6;Alox15;Perp;Krt8;Myh11
GO:0043583	ear development	BP	103	1	0.460221	0.516286	0.000543044		Tbx1	Sobp	Msx1;Fzd6;Myc;Ror2;Insig1;Osr2;Gata2
GO:0016705	oxidoreductase activity, acting on paired donors, with incorporation or reduction of molecular oxygen	MF	111	1.40215e-05	0.476114	1	0.473275	Cyp4a31;Cyp2c44;Fmo3;Cyp4a10;Cyp8b1;Cyp4a32;Cyp3a11	Cyp2e1		Scd2;Scd4
GO:0048646	anatomical structure formation involved in morphogenesis	BP	588	1	0.480459	0.161193	0.000238867		Ramp1;Mmp9;Tbx1;Tmem100	Tbr1;Mfge8;Mef2c;Plxnd1;Junb;Nr4a1	Ifitm1;Gata2;Ramp1;Celsr2;Sox17;Wt1;Cd9;Hopx;Hoxa11;Efnb2;Anpep;Krt19;Fzd6;Msx1;Ldb3;Tcap;Enpep;Ror2;Pdgfra;Krt8
GO:0042383	sarcolemma	CC	91	1	0.483608	0.428647	1.50666e-05		Aqp4	Col6a1	Esr1;Atp1a1;Ezr;Pgm5;Krt8;Krt19;Des;Flnc
GO:0009888	tissue development	BP	890	0.856897	0.495529	0.0264111	5.77237e-06	Egr1;Socs3;Tagln2	Myl3;Car2;Tmem100;Pin1;Lrrc17;Tbx1	Mef2c;Egr1;Nr4a1;Plxnd1;Lrrc17;Ldb2;Junb;Arc;Naca;Adrb1;Homer1	Wt1;Efnb2;Sox17;Alox15;Car2;Msx1;Fzd6;Pdgfra;Bcl9;Ngfr;St14;Jph2;Tpm1;Hopx;Id2;Hoxd9;Myc;Ezr;Esr1;Ppl;Myh11;Osr2;Pkdcc;Hoxa11;Mylpf;Dact3;Tcap;Ifitm1;Ror2;Asb2
GO:0055002	striated muscle cell development	BP	94	1	0.506886	0.00197829	0.000196765		Pin1	Mef2c;Naca;Adrb1;Homer1	Ldb3;Flnc;Krt8;Tcap;Krt19;Pdgfra;Myh11
GO:0009952	anterior/posterior pattern specification	BP	112	1	0.506886	0.139148	8.10292e-07		Tbx1	Fezf2;Arc	Sox17;Celsr2;Hoxb8;Ifitm1;Msx1;Ror2;Hoxa10;Emx2;Hoxa11;Hoxd9;Wt1
GO:0050793	regulation of developmental process	BP	1114	0.542573	0.529231	0.000785424	0.00406373	Bcl6;Egr1;Socs3;Mif;Apcs;S100a13	Mmp9;Tbx1;Pin1;Lrrc17;Nfkbia;Car2;Tmem100	Arc;Gas7;Plxnd1;Naca;Lrrc17;Palm;Egr1;Sipa1l1;Mef2c;Ldb2;Adrb1;Lrrc7;Dkkl1;Fezf2;Tbr1;Junb;Arpc2	Msx1;Lpar3;Myc;Sox17;Gata2;Hopx;Ezr;Cd24a;Bcl9;Osr2;Jph2;Id2;Wt1;Hoxa11;Esr1;Ctla2a;Fzd6;Ngfr;Insig1;Car2;Dact3;Ror2;Hoxb8;Pdgfra;Pkdcc;Tead3;Efnb2
GO:0055001	muscle cell development	BP	102	1	0.531744	0.00270841	0.000357059		Pin1	Mef2c;Homer1;Naca;Adrb1	Ldb3;Flnc;Tcap;Pdgfra;Krt19;Krt8;Myh11
GO:0009887	organ morphogenesis	BP	445	1	0.537858	0.16857	9.43559e-07		Myl3;Tbx1;Alpl	Sobp;Tbr1;Mef2c;Naca;Plxnd1	Ror2;Esr1;Hoxd9;Fzd6;Ngfr;Myc;Efnb2;Id2;Hoxb8;Osr2;Sox17;Wt1;Perp;Tcap;Msx1;Pdgfra;Tpm1;Insig1;Hoxa11;Gata2;Itgb4
GO:0009653	anatomical structure morphogenesis	BP	1297	0.910869	0.538129	0.0219129	5.96283e-06	S100a13;Socs3;Ndufs6;Bcl6	Tbx1;Mmp9;Car2;Tmem100;Ramp1;Ndufs6;Myl3;Alpl	Brsk1;Arpc2;Nr4a1;Mef2c;Sipa1l1;Plxnd1;Sobp;Palm;Mfge8;Gas7;Junb;Arc;Tbr1;Naca;Fezf2	Insig1;Ifitm1;Efnb2;Krt19;Msx1;Tcap;Hopx;Cdh11;Hoxa11;Car2;Gata2;Lpar3;Ezr;Celsr2;Hoxb8;Enpep;Ramp1;Pkdcc;Wt1;Dact3;Krt8;Ngfr;Sox17;Itgb4;Ror2;Fzd6;Hoxd9;Myc;Pdgfra;Tpm1;Perp;Ldb3;Anpep;Hoxa10;Cd9;Esr1;Id2;Osr2
GO:0015629	actin cytoskeleton	CC	268	1	0.548988	0.0716603	0.000285174		Myl3;Msrb1	Arc;Arpc2;Lrrc7;Gas7	Tnni2;Pdlim3;Ezr;Pgm5;Flnc;Myl1;Tpm1;Actn3;Tnnc2;Tpm2;Myh11;Mylpf
GO:0009790	embryo development	BP	627	0.658815	0.558174	0.567632	0.000208366	Hba-a2;Socs3;Hba-a1	Hba-a2;Tbx1;Tmem100;Hba-a1	Sobp;Mef2c;Junb;Hba-a1	Ifitm1;Krt19;Hoxd9;Msx1;Sox17;Pkdcc;Insig1;Hoxa11;Wt1;Ror2;Fzd6;Hoxb8;Myc;Hopx;Id2;Osr2;Gata2;Krt8;Pdgfra;Tpm1;Hoxa10
GO:0007519	skeletal muscle tissue development	BP	114	0.427867	0.561087	0.000572159	0.00446802	Egr1	Tbx1	Naca;Mef2c;Egr1;Nr4a1;Homer1	Mylpf;Hoxd9;Sox17;Asb2;Myc;Bcl9
GO:0060538	skeletal muscle organ development	BP	117	0.438241	0.566735	0.000670473	0.00108731	Egr1	Tbx1	Mef2c;Nr4a1;Naca;Homer1;Egr1	Asb2;Sox17;Mylpf;Bcl9;Wt1;Myc;Hoxd9
GO:0007275	multicellular organismal development	BP	2331	0.469648	0.569647	0.00744002	0.000122544	Prdx4;Socs3;Asl;Ccnf;Rps14;Bcl6;Mif;Egr1;Ndufs6;Gadd45b;Hba-a2;Apcs;Hba-a1	Myl3;Mmp9;Nfkbia;Pin1;Tbx1;Lrrc17;Ramp1;Alpl;Tmem100;Sfxn1;Ndufs6;Hba-a2;Car2;Hba-a1	Sipa1l1;Nr4a1;Tbr1;Homer1;Mef2c;Gas7;Ldb2;Camk4;Cckbr;Adrb1;Lrrc17;Brsk1;Palm;Fezf2;Mfge8;Egr1;Dym;Sobp;Lrrc7;Rtn4rl2;Naca;Arc;Plxnd1;Hba-a1;Junb	Perp;Ngfr;Wt1;Esr1;Krt19;Alox15;Anpep;Fzd6;Hoxa11;Hoxd9;Ctla2a;Pdgfra;Hoxb8;Myc;Ifitm1;Hopx;Ror2;Id2;Mdk;Emx2;Osr2;Gata2;Celsr2;Bcl9;Ppl;Pdlim3;Lpar3;Enpep;Sox17;Krt8;Gadd45g;Msx1;Ramp1;Dkk3;Cd24a;Pkdcc;Itgb4;Tpm1;Myh11;Hoxa10;Dact3;Irs1;Efnb2;Cd9;Insig1;Tcap;Cdh11;Asb2;St14;Mylpf;Jph2;Car2;Des
GO:0048562	embryonic organ morphogenesis	BP	151	1	0.604315	0.262892	1.65783e-07		Tbx1	Sobp;Mef2c	Osr2;Hoxb8;Gata2;Sox17;Myc;Pdgfra;Insig1;Fzd6;Hoxd9;Ror2;Id2;Hoxa11;Msx1
GO:0016053	organic acid biosynthetic process	BP	172	0.00414322	0.636327	1	0.000842597	Mif;Tecr;Avpr1a;Mthfr;Asl	Elovl6		Chdh;Acss2;Scd4;Elovl6;Alox15;Ckm;Slc27a2;Insig1;Scd2
GO:0046394	carboxylic acid biosynthetic process	BP	172	0.00414322	0.636327	1	0.000842597	Avpr1a;Asl;Mif;Tecr;Mthfr	Elovl6		Ckm;Acss2;Chdh;Slc27a2;Scd4;Scd2;Elovl6;Alox15;Insig1
GO:0003002	regionalization	BP	170	1	0.638681	0.0224369	2.4705e-05		Tbx1	Arc;Tbr1;Fezf2;Mef2c	Hoxd9;Sox17;Celsr2;Hoxb8;Emx2;Ror2;Ifitm1;Hoxa10;Msx1;Hoxa11;Wt1
GO:0048869	cellular developmental process	BP	1933	0.210931	0.65616	0.00293248	0.000347864	Egr1;Tagln2;Rps15;Apcs;Mif;Ndufs6;Socs3;Rps14;Hba-a1;Gadd45b;Bcl6;Hba-a2;S100a13	Tbx1;Ndufs6;Pin1;Tmem100;Lrrc17;Car2;Hba-a1;Nfkbia;Alpl;Hba-a2;Sfxn1	Egr1;Sipa1l1;Gas7;Arpc2;Mef2c;Lrrc7;Fezf2;Junb;Ldb2;Brsk1;Col6a1;Homer1;Arc;Rtn4rl2;Tbr1;Lrrc17;Camk4;Hba-a1;Dkkl1;Naca;Palm;Adrb1;Nr4a1	Osr2;Sox17;Lpar3;Gata2;Wt1;Flnc;Tead3;Hoxa11;Tcap;Cd24a;Fzd6;Esr1;Myh11;Id2;Krt19;Celsr2;Ctla2a;Myc;Bcl9;Pdgfra;Asb2;Dact3;Msx1;Efnb2;Hopx;Mdk;Anpep;Ngfr;Car2;Insig1;Plac8;Ezr;Gadd45g;Rgs2;Ppl;Pkdcc;Ldb3;Krt8;St14;Emx2;Cdh11;Hoxb8;Cd9;Ror2;Hoxd9
GO:0048856	anatomical structure development	BP	2465	0.440271	0.664934	0.00696025	7.70877e-05	Egr1;Tagln2;Socs3;Mif;Ccnf;Rps14;Prdx4;Bcl6;Ndufs6;Apcs;Hba-a1;Hba-a2;Asl;S100a13	Ramp1;Lrrc17;Mmp9;Myl3;Pin1;Tbx1;Sfxn1;Car2;Ndufs6;Nfkbia;Hba-a1;Hba-a2;Alpl;Tmem100	Egr1;Cckbr;Mef2c;Naca;Camk4;Plxnd1;Lrrc17;Brsk1;Junb;Sipa1l1;Arpc2;Fezf2;Mfge8;Nr4a1;Homer1;Tbr1;Rtn4rl2;Ldb2;Lrrc7;Arc;Dym;Hba-a1;Gas7;Sobp;Palm;Adrb1	Ngfr;Cd24a;Msx1;Cdh11;Wt1;Enpep;Hoxd9;Ror2;Ramp1;Esr1;Gata2;Hoxa11;Emx2;Osr2;Sox17;Tcap;Lpar3;Dact3;Fzd6;Bcl9;Pdgfra;Perp;Ctla2a;Mdk;Hopx;Ifitm1;Tpm1;Ppl;Myc;Ldb3;Myh11;Efnb2;Cd9;Irs1;Id2;Flnc;Anpep;Car2;Celsr2;Mylpf;Gadd45g;Itgb4;Hoxb8;St14;Asb2;Pkdcc;Insig1;Krt19;Krt8;Pdlim3;Ezr;Alox15;Hoxa10;Des;Tead3;Jph2
GO:0030154	cell differentiation	BP	1801	0.35138	0.682933	0.00261648	0.000126715	Tagln2;Socs3;Bcl6;Apcs;Egr1;Gadd45b;Rps14;Rps15;Hba-a2;Mif;Hba-a1	Lrrc17;Nfkbia;Tmem100;Tbx1;Car2;Alpl;Hba-a2;Pin1;Sfxn1;Hba-a1	Gas7;Mef2c;Arpc2;Nr4a1;Rtn4rl2;Sipa1l1;Lrrc17;Palm;Col6a1;Brsk1;Naca;Ldb2;Adrb1;Junb;Egr1;Lrrc7;Homer1;Dkkl1;Tbr1;Camk4;Fezf2;Hba-a1	Hopx;Lpar3;Hoxd9;Emx2;Ngfr;Tcap;Myh11;Osr2;Msx1;Cdh11;Sox17;Gata2;Insig1;Anpep;Krt19;St14;Mdk;Tead3;Id2;Efnb2;Flnc;Ppl;Wt1;Rgs2;Plac8;Bcl9;Ldb3;Pkdcc;Pdgfra;Cd24a;Myc;Car2;Celsr2;Krt8;Ror2;Dact3;Gadd45g;Ctla2a;Asb2;Ezr;Hoxa11;Hoxb8;Esr1;Fzd6
GO:0006875	cellular metal ion homeostasis	BP	211	0.0770254	0.710381	0.419965	0.000172707	Avpr1a;Mt1;Slc39a4	Mt1	Gpr6;Cckbr	Hamp;Cd24a;Atp2a1;Pdgfra;Myc;Gstm7;Jph2;Esr1;Atp1a1;Pygm;Lpar3
GO:0008284	positive regulation of cell proliferation	BP	396	0.000251574	0.712628	0.110529	0.0734757	Mif;Cdkn1a;Egr1;Fgf21;S100a13;Slc35f6;Igfbp2;Avpr1a;Bcl6	Tbx1;Cdkn1a	Cckbr;Naca;Nr4a1;Egr1;Mef2c	Cd24a;Myc;Irs1;Plac8;Id2;Marcksl1;Osr2;Pdgfra;Ngfr;Esr1
GO:0044767	single-organism developmental process	BP	2737	0.275822	0.733988	0.00667649	0.000212983	Tagln2;Mif;Asl;Egr1;Apcs;Ndufs6;Socs3;Rps14;Cdkn1a;Ccnf;Gadd45b;Bcl6;Hba-a1;Prdx4;S100a13;Rps15;Hba-a2	Tbx1;Sfxn1;Nfkbia;Pin1;Ndufs6;Lrrc17;Cdkn1a;Mmp9;Tmem100;Myl3;Hba-a1;Car2;Ramp1;Alpl;Hba-a2	Cckbr;Plxnd1;Fezf2;Sipa1l1;Ldb2;Camk4;Adrb1;Egr1;Gas7;Lrrc7;Brsk1;Mfge8;Junb;Rtn4rl2;Col6a1;Nr4a1;Lrrc17;Dkkl1;Tbr1;Mef2c;Arc;Dym;Hba-a1;Sobp;Arpc2;Homer1;Palm;Naca	Wt1;Msx1;Ezr;Cdh11;Osr2;Dact3;Hoxb8;Enpep;Celsr2;Tpm1;Mdk;Sox17;Id2;Efnb2;Emx2;Ifitm1;Tcap;Gata2;Perp;Cd24a;Pdgfra;Hoxa10;Ppl;Hoxa11;Ror2;Bcl9;Insig1;Itgb4;Esr1;Fzd6;Dkk3;Hoxd9;Myc;Cd9;Tead3;Anpep;Irs1;Rgs2;Krt19;St14;Jph2;Ngfr;Ldb3;Hopx;Krt8;Gadd45g;Mylpf;Car2;Ctla2a;Pkdcc;Pdlim3;Ramp1;Alox15;Des;Myh11;Flnc;Lpar3;Plac8;Asb2
GO:0007389	pattern specification process	BP	223	1	0.735653	0.0147134	0.000236722		Tbx1	Fezf2;Arc;Mef2c;Tbr1;Plxnd1	Sox17;Hoxb8;Wt1;Msx1;Ifitm1;Emx2;Hoxd9;Hoxa10;Celsr2;Hoxa11;Ror2
GO:0032502	developmental process	BP	2757	0.288987	0.746792	0.00734963	0.00025987	Socs3;Tagln2;Mif;Bcl6;Ccnf;Gadd45b;Prdx4;Egr1;Rps14;Cdkn1a;Rps15;S100a13;Asl;Hba-a1;Apcs;Hba-a2;Ndufs6	Tbx1;Mmp9;Car2;Tmem100;Myl3;Alpl;Lrrc17;Sfxn1;Cdkn1a;Ramp1;Nfkbia;Pin1;Hba-a1;Hba-a2;Ndufs6	Ldb2;Sipa1l1;Homer1;Adrb1;Mfge8;Tbr1;Lrrc7;Plxnd1;Mef2c;Fezf2;Cckbr;Rtn4rl2;Gas7;Camk4;Lrrc17;Egr1;Col6a1;Brsk1;Nr4a1;Arc;Naca;Palm;Dym;Dkkl1;Hba-a1;Sobp;Arpc2;Junb	Hopx;Ezr;Ifitm1;Msx1;Sox17;Enpep;Insig1;Mdk;Irs1;Ppl;Fzd6;Plac8;Ngfr;Car2;Id2;Cd24a;Hoxa11;Pkdcc;Krt19;Hoxd9;Wt1;Pdgfra;Lpar3;Esr1;Osr2;Flnc;Gata2;Gadd45g;Ldb3;Myh11;Tcap;Efnb2;Cdh11;Myc;Krt8;Ramp1;Cd9;Asb2;Emx2;Tpm1;Rgs2;Hoxa10;Hoxb8;Celsr2;Bcl9;Ctla2a;Perp;Dact3;Jph2;Mylpf;St14;Alox15;Pdlim3;Anpep;Itgb4;Tead3;Ror2;Dkk3;Des
GO:0048568	embryonic organ development	BP	229	0.693857	0.768031	0.194092	2.56579e-07	Socs3	Tbx1	Sobp;Mef2c;Junb	Myc;Hoxa11;Pdgfra;Id2;Insig1;Msx1;Sox17;Osr2;Ror2;Gata2;Fzd6;Hoxb8;Krt8;Pkdcc;Krt19;Hoxd9
GO:0044283	small molecule biosynthetic process	BP	262	0.0212989	0.78834	1	0.000388032	Mthfr;Avpr1a;Tecr;Mif;Asl	Elovl6		Elovl6;Chdh;Scd4;Dkk3;Insig1;Sgms2;Scd2;Acss2;Slc27a2;Pmvk;Alox15;Ckm
GO:0038023	signaling receptor activity	MF	326	0.79709	0.835257	0.000929351	0.0211778	Avpr1a	Ramp1	Kcnh3;Cckbr;Plxnd1;Gpr6;Adrb1;Vipr1;Chrm1;Nr4a1;Gpr88	Lpar3;Esr1;Fzd6;Ramp1;Pdgfra;Hfe2;Ror2;Celsr2;Ngfr;Pigr
GO:0005886	plasma membrane	CC	1957	0.864816	0.862045	0.00106026	5.23342e-05	C8b;Cyp4a31;Chic2;Avpr1a;Slc39a4;Cyp4a10;Igfbp2;Cyp4a32	S100a9;H2-Q10;Car2;Fxyd6;Tmem100;Nfkbia;Aqp4;Ramp1;Alpl	Cdhr1;Lrrc7;Brsk1;Cckbr;Adcy2;Plxnd1;Chrm1;Arhgap33;Sipa1l1;Palm;Mfge8;Homer1;Rtn4rl2;Prss12;Adrb1;Olfm2;Arpc2;Ano3;Arc;1810055G02Rik;Gpr6;Col6a1;Vipr1;Kcnh3;Gpr88	Cldn3;Ppl;Efnb2;Cdh11;Pgm5;Sgms2;Anpep;Krt19;Ifitm1;Marcksl1;Perp;Eno3;St14;Rgs2;Itgb4;Hspa1a;Esr1;Cd9;Lzts3;Cd24a;Jph2;Ngfr;Hfe2;Enpep;Ighg1;Atp1a1;Fzd6;Car2;Emb;Alox15;Fxyd6;Ezr;Pdgfra;Cldn10;Flnc;Des;Celsr2;Krt8;Arl4c;Ror2;Arrdc2;Ramp1;Lpar3;Ptpn13;Parm1;Irs1;Ifitm3;Pigr
GO:0048598	embryonic morphogenesis	BP	328	0.815713	0.878989	0.63515	0.000239583	Socs3	Tbx1	Sobp;Mef2c	Id2;Hoxa11;Hoxd9;Hoxb8;Insig1;Osr2;Fzd6;Sox17;Msx1;Myc;Pdgfra;Ror2;Gata2;Hoxa10
GO:0071944	cell periphery	CC	2021	0.889616	0.888134	0.00158573	2.72395e-05	Avpr1a;Chic2;Slc39a4;Cyp4a32;Cyp4a10;Cyp4a31;C8b;Igfbp2	Tmem100;H2-Q10;Fxyd6;Alpl;Aqp4;Car2;Nfkbia;S100a9;Ramp1	Lrrc7;Plxnd1;Chrm1;Palm;Rtn4rl2;Ano3;Olfm2;Cckbr;Adcy2;Cdhr1;Arhgap33;Homer1;Prss12;Gpr88;Brsk1;Mfge8;Kcnh3;Sipa1l1;Vipr1;Adrb1;Gpr6;Col6a1;1810055G02Rik;Arpc2;Arc	Ifitm1;Ror2;Pgm5;Efnb2;Cdh11;Cd9;Perp;Rgs2;Cldn3;Cd24a;Marcksl1;Ppl;Ezr;Sgms2;Krt19;Flnc;Lzts3;St14;Fxyd6;Eno3;Emb;Pigr;Itgb4;Pdgfra;Jph2;Parm1;Cldn10;Atp1a1;Alox15;Krt8;Lpar3;Irs1;Ptpn13;Car2;Ighg1;Enpep;Ifitm3;Arrdc2;Ngfr;Fzd6;Ramp1;Hfe2;Des;Anpep;Celsr2;Esr1;Hspa1a;Actg2;Arl4c;Krt18
GO:0044459	plasma membrane part	CC	874	0.336246	0.897048	0.0192348	1.19356e-05	Slc39a4;Cyp4a10;Cyp4a31;C8b;Igfbp2;Cyp4a32	Car2;Aqp4;H2-Q10	Cdhr1;Olfm2;Palm;Rtn4rl2;Lrrc7;Mfge8;Kcnh3;Homer1;Chrm1;Plxnd1;Arc;Sipa1l1	Itgb4;Sgms2;Pdgfra;Ezr;Pgm5;Cldn3;Perp;Rgs2;Cd24a;Krt19;Irs1;Anpep;Atp1a1;Enpep;Ror2;St14;Ppl;Cd9;Car2;Lzts3;Hfe2;Krt8;Ngfr;Emb;Fzd6;Hspa1a;Esr1;Ighg1;Alox15
GO:0004872	receptor activity	MF	413	0.87986	0.906995	0.000227565	0.0209328	Avpr1a	Ramp1	Plxnd1;Adrb1;Chrm1;Cckbr;Rtn4rl2;Gpr6;Prss12;Vipr1;Nr4a1;Kcnh3;Gpr88	Pdgfra;Fzd6;Celsr2;Enpp3;Ror2;Itgb4;Ramp1;Hfe2;Ngfr;Esr1;Lpar3;Pigr
GO:0005856	cytoskeleton	CC	1178	0.998861	0.957114	0.338714	0.000331939	Ccnf	S100a9;Myl3;Lmod1;Msrb1	Sipa1l1;Homer1;Brsk1;Lrrc7;Elmod1;Arpc2;Arc;Chrm1;Gas7	Ezr;Cnn1;Krt19;Pgm5;Id2;Lzts3;Flnc;Ngfr;Ppl;Tpm1;Krt18;Des;Irs1;Myc;Myh11;Krt8;Tpm2;Ldb3;Lmod1;Hspa1a;Jakmip1;Actg2;Myl1;Actn3;Gtf2f2;Pdlim3;Mylpf;Krt7;Tnnc2;Tnni2;Ptpn13
GO:0008392	arachidonic acid epoxygenase activity	MF	10	9.0449e-08	1	1	1	Cyp2c44;Cyp4a32;Cyp4a10;Cyp4a31
GO:0008391	arachidonic acid monooxygenase activity	MF	13	4.2053e-07	1	1	1	Cyp4a32;Cyp4a31;Cyp2c44;Cyp4a10
GO:0036100	leukotriene catabolic process	BP	7	8.26675e-07	1	1	1	Cyp4a10;Cyp4a31;Cyp4a32
GO:0036101	leukotriene B4 catabolic process	BP	7	8.26675e-07	1	1	1	Cyp4a10;Cyp4a32;Cyp4a31
GO:0036102	leukotriene B4 metabolic process	BP	7	8.26675e-07	1	1	1	Cyp4a32;Cyp4a31;Cyp4a10
GO:1901523	icosanoid catabolic process	BP	7	8.26675e-07	1	1	1	Cyp4a32;Cyp4a10;Cyp4a31
GO:1901569	fatty acid derivative catabolic process	BP	7	8.26675e-07	1	1	1	Cyp4a10;Cyp4a32;Cyp4a31
GO:0018685	alkane 1-monooxygenase activity	MF	8	2.22232e-06	1	1	1	Cyp4a31;Cyp4a32;Cyp4a10
GO:0050051	leukotriene-B4 20-monooxygenase activity	MF	8	2.22232e-06	1	1	1	Cyp4a10;Cyp4a31;Cyp4a32
GO:0006690	icosanoid metabolic process	BP	42	2.87466e-06	1	1	0.473561	Mif;Avpr1a;Cyp4a31;Cyp4a32;Cyp4a10			Alox15
GO:1901568	fatty acid derivative metabolic process	BP	42	2.87466e-06	1	1	0.473561	Avpr1a;Cyp4a10;Mif;Cyp4a31;Cyp4a32			Alox15
GO:0033559	unsaturated fatty acid metabolic process	BP	44	3.73395e-06	1	1	0.487771	Mif;Cyp4a32;Cyp4a10;Avpr1a;Cyp4a31			Alox15
GO:0016713	oxidoreductase activity, acting on paired donors, with incorporation or reduction of molecular oxygen, reduced iron-sulfur protein as one donor, and incorporation of one atom of oxygen	MF	9	4.42508e-06	1	1	1	Cyp4a10;Cyp4a31;Cyp4a32
GO:0042758	long-chain fatty acid catabolic process	BP	10	7.14078e-06	1	1	1	Cyp4a10;Cyp4a31;Cyp4a32
GO:0006691	leukotriene metabolic process	BP	14	5.68668e-05	1	1	1	Cyp4a31;Cyp4a10;Cyp4a32
GO:0042274	ribosomal small subunit biogenesis	BP	28	0.000383915	1	1	0.279127	Rps16;Rps15;Rps14			Rps24
GO:0001656	metanephros development	BP	38	0.140335	1	0.209585	0.000114022	Egr1		Egr1	Myc;Wt1;Pdgfra;Id2;Hoxa11
GO:0008584	male gonad development	BP	52	0.247686	1	1	0.000786761	Prdx4			Hoxa11;Pdgfra;Wt1;Esr1;Hoxa10
GO:0046546	development of primary male sexual characteristics	BP	52	0.247686	1	1	0.000786761	Prdx4			Wt1;Pdgfra;Esr1;Hoxa11;Hoxa10
GO:0072001	renal system development	BP	137	0.471501	1	0.211826	0.0001161	Egr1		Mef2c;Egr1	Osr2;Emx2;Wt1;Itgb4;Myc;Pdgfra;Id2;Hoxa11;Sox17
GO:0001655	urogenital system development	BP	158	0.532319	1	0.260661	1.78306e-05	Egr1		Egr1;Mef2c	Pdgfra;Id2;Wt1;Myc;Esr1;Gata2;Emx2;Sox17;Hoxa11;Itgb4;Osr2
GO:0045761	regulation of adenylate cyclase activity	BP	20	1	1	0.000487506	1			Palm;Adrb1;Adcy2
GO:0021902	commitment of neuronal cell to specific neuron type in forebrain	BP	7	1	1	0.000731389	0.0135306			Fezf2;Tbr1	Gata2
GO:0022600	digestive system process	BP	27	1	1	0.000748298	1			Chrm1;Cckbr;Adrb1
GO:0031279	regulation of cyclase activity	BP	23	1	1	0.000748298	1			Palm;Adrb1;Adcy2
GO:0051339	regulation of lyase activity	BP	25	1	1	0.000906367	1			Adrb1;Adcy2;Palm
GO:0007586	digestion	BP	28	1	1	0.000992737	1			Cckbr;Adrb1;Chrm1
GO:0045214	sarcomere organization	BP	18	1	1	0.0808791	3.91383e-05			Mef2c	Krt19;Tcap;Krt8;Ldb3
GO:0045932	negative regulation of muscle contraction	BP	16	1	1	0.0918941	0.000488397			Adrb1	Mrvi1;Rgs2;Atp2a1
GO:0030239	myofibril assembly	BP	26	1	1	0.113535	7.24803e-06			Mef2c	Ldb3;Tcap;Krt8;Krt19;Pdgfra
GO:0031032	actomyosin structure organization	BP	40	1	1	0.185352	6.51793e-06			Mef2c	Tcap;Ldb3;Krt19;Cnn1;Krt8;Pdgfra
GO:0048565	digestive tract development	BP	54	1	1	0.316367	0.000856119			Cckbr	Sox17;Itgb4;Id2;Pkdcc;Pdgfra
GO:0005865	striated muscle thin filament	CC	11	1	1	1	2.2449e-08				Tpm1;Actn3;Tnnc2;Tnni2;Tpm2
GO:0036379	myofilament	CC	12	1	1	1	4.99625e-08				Tnni2;Tnnc2;Tpm1;Tpm2;Actn3
GO:0008307	structural constituent of muscle	MF	16	1	1	1	1.78224e-07				Krt19;Tcap;Mylpf;Myh11;Pdlim3
GO:0035878	nail development	BP	7	1	1	1	9.61724e-06				Msx1;Itgb4;Fzd6
GO:0045989	positive regulation of striated muscle contraction	BP	7	1	1	1	2.38041e-05				Atp1a1;Rgs2;Atp2a1
GO:0048736	appendage development	BP	91	1	1	1	4.87074e-05				Hoxa10;Pkdcc;Hoxd9;Itgb4;Msx1;Osr2;Hoxa11;Fzd6
GO:0060173	limb development	BP	91	1	1	1	4.87074e-05				Msx1;Pkdcc;Hoxa10;Hoxd9;Itgb4;Osr2;Fzd6;Hoxa11
GO:0005882	intermediate filament	CC	30	1	1	1	5.30396e-05				Krt8;Krt18;Des;Krt7;Krt19
GO:0023019	signal transduction involved in regulation of gene expression	BP	10	1	1	1	8.16674e-05				Sox17;Msx1;Pdgfra
GO:0035115	embryonic forelimb morphogenesis	BP	20	1	1	1	8.50058e-05				Hoxd9;Osr2;Hoxa11;Msx1
GO:0035136	forelimb morphogenesis	BP	22	1	1	1	0.000106545				Hoxa11;Hoxd9;Osr2;Msx1
GO:0045095	keratin filament	CC	11	1	1	1	0.000127521				Krt18;Krt7;Krt8
GO:0035107	appendage morphogenesis	BP	79	1	1	1	0.000158709				Fzd6;Pkdcc;Msx1;Hoxd9;Hoxa10;Hoxa11;Osr2
GO:0035108	limb morphogenesis	BP	79	1	1	1	0.000158709				Msx1;Fzd6;Pkdcc;Hoxa11;Hoxa10;Hoxd9;Osr2
GO:0005862	muscle thin filament tropomyosin	CC	4	1	1	1	0.000180098				Tpm1;Tpm2
GO:0035880	embryonic nail plate morphogenesis	BP	4	1	1	1	0.000181872				Fzd6;Msx1
GO:0060065	uterus development	BP	10	1	1	1	0.000192132				Hoxa10;Esr1;Hoxa11
GO:0010894	negative regulation of steroid biosynthetic process	BP	12	1	1	1	0.000271754				Dkk3;Insig1;Atp1a1
GO:0045939	negative regulation of steroid metabolic process	BP	12	1	1	1	0.000271754				Insig1;Atp1a1;Dkk3
GO:0016010	dystrophin-associated glycoprotein complex	CC	14	1	1	1	0.000364722				Krt8;Pgm5;Krt19
GO:0048806	genitalia development	BP	24	1	1	1	0.000381769				Esr1;Ror2;Pdgfra;Wt1
GO:0030325	adrenal gland development	BP	14	1	1	1	0.000488397				Pdgfra;Mdk;Wt1
GO:0005861	troponin complex	CC	4	1	1	1	0.000535507				Tnnc2;Tnni2
GO:0031944	negative regulation of glucocorticoid metabolic process	BP	5	1	1	1	0.00054076				Dkk3;Atp1a1
GO:0031947	negative regulation of glucocorticoid biosynthetic process	BP	5	1	1	1	0.00054076				Atp1a1;Dkk3
GO:0060316	positive regulation of ryanodine-sensitive calcium-release channel activity	BP	5	1	1	1	0.00054076				Gstm7;Jph2
GO:0030326	embryonic limb morphogenesis	BP	70	1	1	1	0.000556736				Hoxd9;Msx1;Hoxa10;Fzd6;Hoxa11;Osr2
GO:0035113	embryonic appendage morphogenesis	BP	70	1	1	1	0.000556736				Hoxd9;Osr2;Hoxa11;Msx1;Hoxa10;Fzd6
GO:0009954	proximal/distal pattern formation	BP	14	1	1	1	0.000628634				Hoxa10;Hoxa11;Hoxd9
GO:0045933	positive regulation of muscle contraction	BP	15	1	1	1	0.000980427				Rgs2;Atp1a1;Atp2a1
