# Supplementary material for: Common and unique transcriptional responses to dietary restriction and loss of insulin receptor substrate 1 (IRS1) in mice
Source: Aging (Albany NY). 2018 May 20;10(5):1027–52. doi: 10.18632/aging.101446 (PMC5990393; doi:10.18632/aging.101446)
Supplement: Supplementary Table S3 [file aging-10-101446-s004.xlsx]

## Sheet: GO_KO_down.txt
GO ID	GO Term	GO Category	Total Genes	WAT KOAL DOWN	BRAIN KOAL DOWN	SM KOAL DOWN	LIVER KOAL DOWN	WAT KOAL DOWN Genes	BRAIN KOAL DOWN Genes	SM KOAL DOWN Genes	LIVER KOAL DOWN Genes
GO:0045892	negative regulation of transcription, DNA-templated	BP	588	0.824894	1	0.343284	0.000396868	Mdfic;Cela1;Cited2;Tgfb1;Cdkn1c;Hr		Prmt2;Yy1;Nipbl;Vldlr;Lep	Trim11;Zbtb38;Rest;Med1;Zbtb18;Sik1;Cd36;Bahd1
GO:1902679	negative regulation of RNA biosynthetic process	BP	602	0.842964	1	0.362109	0.000469312	Tgfb1;Mdfic;Hr;Cited2;Cdkn1c;Cela1		Prmt2;Lep;Vldlr;Yy1;Nipbl	Zbtb18;Med1;Sik1;Trim11;Zbtb38;Cd36;Rest;Bahd1
GO:0051253	negative regulation of RNA metabolic process	BP	629	0.870047	1	0.397169	0.000632538	Cited2;Cela1;Hr;Tgfb1;Mdfic;Cdkn1c		Vldlr;Prmt2;Yy1;Lep;Nipbl	Zbtb38;Trim11;Rest;Bahd1;Zbtb18;Med1;Sik1;Cd36
GO:0010629	negative regulation of gene expression	BP	676	0.722681	1	0.465399	0.000961683	Cited2;Slit3;Mdfic;Tgfb1;Cela1;Cdkn1c;Vegfb;Hr		Yy1;Nipbl;Vldlr;Prmt2;Lep	Rest;Trim11;Bahd1;Zbtb38;Cd36;Zbtb18;Med1;Sik1
GO:2000113	negative regulation of cellular macromolecule biosynthetic process	BP	671	0.90445	1	0.280072	0.000971659	Hr;Mdfic;Tgfb1;Cela1;Cdkn1c;Cited2		Yy1;Lep;Prmt2;Pds5a;Vldlr;Nipbl	Zbtb18;Rest;Zbtb38;Bahd1;Cd36;Med1;Trim11;Sik1
GO:0007263	nitric oxide mediated signal transduction	BP	11	0.0003417	1	1	0.0167339	Mt1;Mt2;Thbs1			Cd36
GO:0072358	cardiovascular system development	BP	544	2.62914e-06	0.0599463	0.0710862	0.0181802	Cited2;Rgcc;Vegfb;Srpx2;Thbs2;Thbs1;Sfrp5;Lmo4;Cyr61;Lrg1;Agt;Lox;Anxa2;Adap2;Ccl11;Hmox1;Meox2;Anxa3;Cdh13;Ace;Mfge8;Fgfrl1;Pf4	AW551984;Sparc;Arhgap24	Nipbl;Thbs2;Pkp2;Sfrp5;Lox;Slc9a1;Axin2	Rest;Cd36;Sik1;Med1;Casp7
GO:0072359	circulatory system development	BP	544	2.62914e-06	0.0599463	0.0710862	0.0181802	Cited2;Thbs1;Mfge8;Lrg1;Lmo4;Srpx2;Sfrp5;Meox2;Agt;Cyr61;Vegfb;Anxa2;Thbs2;Ace;Hmox1;Pf4;Anxa3;Ccl11;Rgcc;Adap2;Fgfrl1;Cdh13;Lox	Arhgap24;AW551984;Sparc	Sfrp5;Slc9a1;Thbs2;Pkp2;Nipbl;Axin2;Lox	Cd36;Casp7;Rest;Med1;Sik1
GO:0040007	growth	BP	542	1.60104e-05	1	0.023334	0.0232069	Tgfb1;Ccl11;Emp1;Islr2;Cyr61;Ercc2;Thbs1;Sfrp5;Nedd9;Peg3;Cela1;Crim1;Wisp2;Cdkn1c;Serpine2;Trpv2;Mustn1;Slit3;Fam107a;Agt;Cdh13		Lep;Prmt2;Emp1;Sfrp5;Nedd9;Wisp2;Nipbl;Slc9a1	Med1;Cdkn2aip;Osgin1;Ppan;Cd36
GO:0001558	regulation of cell growth	BP	205	0.000130466	1	0.379616	0.0238673	Wisp2;Tgfb1;Cdh13;Slit3;Serpine2;Crim1;Agt;Trpv2;Cyr61;Islr2;Fam107a		Wisp2;Slc9a1	Cdkn2aip;Ppan;Osgin1
GO:0005615	extracellular space	CC	536	1.14036e-10	0.0484889	0.00156797	0.0274934	Hp;Adam9;C1qtnf1;Anxa2;Thbs1;Ctss;Atxn10;Serpina3n;Agt;Cdh13;Vegfb;Tgfb1;Mfge8;Fbln5;Slit3;Ccl11;Lrg1;Anxa5;Lgals3;Ccl6;C1qc;Serpine2;Timp4;Srpx2;Wisp2;Pf4;Ace;F13a1;Lgals1;Serpina3c;Wfdc21	Pmch;Spp1;Sparc	Sod3;Clu;Serpina3n;H2-Eb1;Lep;Acta2;Vldlr;Wisp2;Wdr60;Serpina3c	Cdk13;Cd36;Serpinb1a;Zbtb38;A1bg
GO:0051051	negative regulation of transport	BP	232	6.7771e-05	1	0.20485	0.0280751	Serpine2;Lgals3;Cnn2;Ace;Sfrp5;Cd74;Tgfb1;Hmox1;Mdfic;Thbs1;Arl6ip5;Rgcc		Lep;Sfrp5;Axin2	Rest;Oaz1;Cd36
GO:0072562	blood microparticle	CC	77	1.43537e-05	1	0.00856017	0.0330643	Agt;Serpina3n;Tgfb1;Hp;Serpina3c;F13a1;C1qc;Anxa5		Serpina3n;Serpina3c;Clu	Zbtb38;A1bg
GO:0065007	biological regulation	BP	5374	4.30957e-06	0.36133	0.000162204	0.039317	Npr3;Tgfb1;Plvap;Cyr61;Ace;Dock8;Peg3;Syp;Vegfb;Anxa3;Lgals3;Lmo4;Abat;C1qtnf1;C1qc;Cdkn1c;Hr;Adap2;F13a1;Serpine2;Hp;Anxa6;Dusp9;Adam9;Meox2;Slit3;Ptafr;Rgcc;Wisp2;Anxa5;Hmox1;Timp4;Fgfrl1;Crim1;Tmem37;Vgll3;Dclk3;Anxa2;Dmrt2;Rarres2;Thbs2;Thbs1;Ercc2;Sfrp5;Map1a;Fcgr3;Ehd3;Pcolce2;Mest;Agt;Gas7;Itih5;Ccl11;Abcg1;Ret;Ctss;Tril;Cnn2;Fbln5;Lgals1;Cdh13;Tln2;Aldh1a1;Btc;Srpx2;Phgdh;Trpv2;Cited2;Cel…	Spp1;Akap12;Irs4;Arhgap24;Sparc;Ret;Cd83;Ugt8a;Mrap2;Pmch;Gabrq	Homer1;Npr3;Osbpl8;Smurf2;Apcdd1;Prmt2;Smoc1;Usp28;H2-Ab1;Icosl;Slc9a1;Sp100;Axin2;Wisp2;Cd79b;Acta2;Dmrt2;Yy1;Epb4.1l2;Thbs2;Sfrp5;Vldlr;Akap12;Lep;Mest;Trim12c;H2-Aa;Itih5;Pds5a;Jak2;Cd79a;Ubxn2a;Tank;Ascc3;Sncg;Apc;Clu;Ranbp2;Nipbl;Serpina3n;Med23;Nedd9;Serpina3c;Pkp2;Ppfibp1;Zfp260;Hivep2;Mapk6;Sucnr1	Med1;Zbtb38;Mief2;Oaz1;Rest;Zbtb18;Irx1;Casp7;Cd36;Ppan;Sik1;Bahd1;Gadd45a;Trim11;Cdkn2aip;Serpinb1a;Upf1;Cdk13;Slc12a7;Thrsp;Osgin1;Dct
GO:0050793	regulation of developmental process	BP	1114	6.99347e-06	0.334386	0.00981049	0.0407235	Ret;Hmox1;Ccl11;Dmrt2;Agt;Anxa3;Gas7;Thbs1;Islr2;C1qc;Vegfb;Vnn1;Srpx2;Cyr61;Adam9;Thbs2;Lrg1;Cela1;Pf4;Sfrp5;Lgals1;Tgfb1;Lmo4;Cdc42ep3;Cd74;Trpv2;Serpine2;Ace;Abcg1;Cited2;Palmd;Btc;Rarres2;Rgcc	Ret;Sparc;Cd83	Nipbl;Dmrt2;Smoc1;Lep;Vldlr;Thbs2;Sfrp5;Pkp2;H2-Aa;Clu;Axin2;Apc;Epb4.1l2;Jak2	Trim11;Med1;Dct;Rest;Cd36;Mief2;Sik1
GO:0016049	cell growth	BP	256	0.000231567	1	0.0824307	0.0429251	Tgfb1;Slit3;Wisp2;Serpine2;Crim1;Fam107a;Emp1;Agt;Cdh13;Islr2;Cyr61;Trpv2		Wisp2;Emp1;Prmt2;Slc9a1	Osgin1;Ppan;Cdkn2aip
GO:0050789	regulation of biological process	BP	5158	0.000188657	0.466136	0.000132453	0.0496475	Cd74;Cited2;Npr3;Slit3;Cnn2;Plvap;Lgals3;Ret;C1qc;Prkcdbp;Dock8;Ercc2;Crim1;Rarres2;Sfrp5;Hp;Adap2;Syp;Hr;Wisp2;Thbs2;Mdfic;Dusp9;Tgfb1;Plekha2;Mfge8;Map1a;Btc;Fgfrl1;Ccl11;Anxa5;C1qtnf1;Rgcc;Arl6ip5;Lmo4;Dclk3;Wfdc21;Ctss;Ptafr;Anxa3;Tmem37;Cyr61;Fcgr3;Serpina3c;Agt;Thbs1;Vegfb;Anxa6;Gas7;Arid2;Vnn1;Ace;Serpine2;Srpx2;Lrg1;Dmrt2;Palmd;Hmox1;Peg3;Cdkn1c;Abcg1;Myo1c;Adam9;Lgals1;Phgdh;Timp4;Vgll3;…	Mrap2;Ret;Pmch;Arhgap24;Sparc;Gabrq;Spp1;Akap12;Irs4;Cd83	Prmt2;Npr3;Axin2;Smoc1;Vldlr;Homer1;Sfrp5;H2-Ab1;Wisp2;Thbs2;Epb4.1l2;Cd79b;Lep;Usp28;Nipbl;Apcdd1;Osbpl8;Sp100;H2-Aa;Pkp2;Icosl;Ubxn2a;Apc;Serpina3c;Tank;Pds5a;Dmrt2;Jak2;Yy1;Akap12;Ascc3;Trim12c;Cd79a;Sucnr1;Serpina3n;Slc9a1;Mest;Ranbp2;Ppfibp1;Smurf2;Itih5;Zfp260;Sncg;Hivep2;Nedd9;Mapk6;Med23;Clu	Mief2;Irx1;Oaz1;Ppan;Med1;Zbtb38;Thrsp;Zbtb18;Bahd1;Trim11;Cdk13;Cd36;Rest;Gadd45a;Sik1;Dct;Casp7;Serpinb1a;Osgin1;Upf1;Cdkn2aip
GO:0051094	positive regulation of developmental process	BP	523	6.2952e-08	0.24604	0.00561624	0.0591889	Anxa3;Islr2;Ret;Rarres2;Thbs2;Tgfb1;Lrg1;Btc;Adam9;Cd74;Hmox1;Srpx2;Ccl11;Dmrt2;Vegfb;Cited2;Trpv2;Pf4;Ace;Cyr61;Serpine2;Vnn1;Rgcc;Agt;Thbs1	Ret;Cd83	Axin2;H2-Aa;Thbs2;Dmrt2;Lep;Jak2;Vldlr;Apc;Clu	Cd36;Mief2;Dct;Med1
GO:0048731	system development	BP	2039	2.36323e-06	0.0233536	0.00259316	0.0628066	Slit3;Cdkn1c;Ret;Cdh13;Srpx2;Sfrp5;Serpine2;Thbs1;C1qc;Npr3;Tgfb1;Mfge8;Lmo4;Thbs2;Rarres2;Atxn10;Lrg1;Papss2;Rgcc;Anxa3;Hp;Lgals1;Agt;Gas7;Cela1;Islr2;Vegfb;Anxa2;Fgfrl1;Ccl11;Hmox1;Cyr61;Chrdl1;Ace;Peg10;Adap2;Pf4;Ercc2;Trpv2;Lgals3;Cited2;Lox;Dmrt2;Cnn2;Vnn1;Phgdh;Crtac1;Alg10b;Cd74;Lipa;Meox2;Aldh1a1	Ret;Ugt8a;Cd83;AW551984;Sparc;Adamts2;Arhgap24;Spp1	Lep;Smoc1;Upf2;Apc;H2-Ab1;Jak2;Sfrp5;Npr3;Nipbl;Thbs2;Yy1;Apcdd1;Vldlr;Axin2;Clu;Pkp2;Homer1;H2-Aa;Icosl;Lox;Dmrt2;Cd79a;Slc9a1	Med1;Rest;Rbm47;Trim11;Casp7;Cd36;Sik1;Zbtb18;Dct;Cdk13
GO:0048513	organ development	BP	1483	9.97502e-05	0.0400161	0.0052893	0.065929	Cdkn1c;Anxa2;Rarres2;Tgfb1;C1qc;Thbs1;Adap2;Sfrp5;Lmo4;Crtac1;Cela1;Chrdl1;Fgfrl1;Hp;Aldh1a1;Vegfb;Slit3;Ret;Serpine2;Cited2;Cd74;Ace;Lgals1;Ccl11;Papss2;Rgcc;Lox;Agt;Cyr61;Meox2;Pf4;Lipa;Alg10b;Phgdh;Ercc2;Vnn1;Cnn2;Peg10	AW551984;Adamts2;Ret;Spp1;Sparc;Cd83	H2-Aa;Nipbl;Sfrp5;Pkp2;Apcdd1;Lep;Cd79a;Jak2;Smoc1;Apc;Clu;Axin2;Yy1;Homer1;H2-Ab1;Lox;Upf2;Slc9a1	Zbtb18;Rbm47;Casp7;Med1;Dct;Rest;Cdk13;Sik1
GO:0051049	regulation of transport	BP	769	0.000126993	1	0.37713	0.0685434	Tmem37;Rgcc;Lgals3;Rarres2;C1qtnf1;Trpv2;Serpine2;Fcgr3;Anxa2;Myo1c;Arl6ip5;Cd74;Mfge8;Abcg1;Cnn2;Mdfic;Tgfb1;Thbs1;Cdh13;Hmox1;Adam9;Ace;Sfrp5;Agt		Lep;Homer1;Axin2;Jak2;Sncg;Sfrp5	Med1;Cd36;Oaz1;Rest;Sik1
GO:0002718	regulation of cytokine production involved in immune response	BP	24	0.000530711	1	1	0.0716225	Cd74;Tril;Tgfb1;Hmox1			Cd36
GO:0002367	cytokine production involved in immune response	BP	31	0.000100357	1	1	0.0902761	Tril;Crlf2;Tgfb1;Hmox1;Cd74			Cd36
GO:2000026	regulation of multicellular organismal development	BP	845	0.000221713	0.201642	0.0823853	0.0926319	Pf4;Vnn1;Cited2;Srpx2;Thbs1;Ace;Ret;Cd74;C1qc;Agt;Trpv2;Sfrp5;Tgfb1;Islr2;Ccl11;Dmrt2;Thbs2;Hmox1;Lgals1;Anxa3;Serpine2;Lrg1;Cyr61;Rgcc;Vegfb	Ret;Sparc;Cd83	Apc;Axin2;Lep;Sfrp5;Dmrt2;Thbs2;Nipbl;H2-Aa;Vldlr	Rest;Cd36;Med1;Trim11;Dct
GO:0048856	anatomical structure development	BP	2465	6.73206e-06	0.0212574	0.00743169	0.0957328	Tgfb1;Atxn10;Cdkn1c;Lmo4;Ccl11;Cdh13;Fgfrl1;Cited2;Ret;Adap2;Cdc42ep3;Serpine2;Rarres2;Anxa3;Ercc2;C1qc;Sfrp5;Agt;Hp;Rgcc;Mustn1;Mfge8;Peg3;Lgals1;Cyr61;Npr3;Trpv2;Cnn2;Thbs2;Palmd;Srpx2;Lrg1;Alg10b;Islr2;Vegfb;Dmrt2;Cela1;Lipa;Hmox1;Crtac1;Anxa2;Mmp12;Aldh1a1;Slit3;Peg10;Thbs1;Adam9;Chrdl1;Phgdh;Vnn1;Lox;Papss2;Gas7;Ace;Meox2;Cd74;Lgals3;Pf4	Arhgap24;Ret;Sparc;AW551984;Ugt8a;Adamts2;Tanc1;Cd83;Spp1	Prmt2;Axin2;Apcdd1;Lep;Yy1;Smoc1;Apc;Slc9a1;Sfrp5;Clu;H2-Ab1;Vldlr;Homer1;Nipbl;Npr3;Pkp2;Thbs2;Epb4.1l2;Cd79a;H2-Aa;Dmrt2;Jak2;Upf2;Lox;Icosl	Med1;Zbtb18;Mief2;Sik1;Trim11;Cd36;Casp7;Rest;Dct;Cdk13;Rbm47
GO:0050878	regulation of body fluid levels	BP	159	0.000119078	1	0.641235	0.0986783	F13a1;Btc;Serpine2;Papss2;Thbs1;C1qtnf1;Npr3;Pf4;Anxa5;Anxa2		Npr3	Med1;Cd36
GO:0000165	MAPK cascade	BP	368	7.47109e-05	0.483912	0.0774727	0.0991677	Tgfb1;Cyr61;Dusp9;Prkcdbp;Adam9;Ret;Sfrp5;Agt;Plvap;Vegfb;Ccl11;Mdfic;Thbs1;Arl6ip5;Cd74;C1qtnf1	Ret	Sfrp5;Apc;Mapk6;Lep;Jak2	Med1;Gadd45a;Cd36
GO:0034341	response to interferon-gamma	BP	31	1	1	3.78854e-05	0.102509			Jak2;H2-Aa;H2-Eb1;H2-Ab1	Med1
GO:0004857	enzyme inhibitor activity	MF	155	0.000107582	1	0.0582621	0.103061	Crim1;Serpina3c;Anxa2;Serpine2;Cdkn1c;Itih5;Timp4;Agt;Anxa3;Serpina3n		Serpina3c;Itih5;Serpina3n	Serpinb1a;Oaz1
GO:0002376	immune system process	BP	986	6.99347e-06	0.184944	0.0509711	0.103557	Cd74;Ccl6;Ccl11;C1qc;Dock8;Ptafr;Lgals3;Hmox1;Ret;Thbs1;Cited2;Hp;Fcgr3;Tril;Cd1d2;Rnasel;Lgals1;Adam9;Anxa2;Ercc2;Rgcc;Plvap;Lmo4;Cdkn1c;Tgfb1;Pf4;Vnn1;Ace;Vegfb;Anxa3;Cfp;Cnn2;Rarres2;Crlf2	Spp1;Ret;Cd83	Lep;Jak2;Cd79a;Apc;H2-Ab1;H2-Eb1;Cd79b;Icosl;H2-Aa;Clu;Trim12c	Trim11;Rbm47;Cd36;Med1;Rest;Cdk13
GO:0051128	regulation of cellular component organization	BP	1093	0.000133347	0.319709	0.143777	0.105911	Fcgr3;Adam9;Cdh13;Srpx2;Thbs2;Lmo4;Rgcc;Map1a;Myo1c;Tgfb1;Crim1;Cdc42ep3;Lgals3;Anxa2;Wisp2;Lgals1;Ccl11;Palmd;Serpine2;Btc;Cyr61;Ret;Mfge8;Agt;Gas7;Slit3;Trpv2;Cnn2;Islr2;Fam107a	Sparc;Arhgap24;Ret	Vldlr;Epb4.1l2;Thbs2;Clu;Nipbl;Wisp2;Apc;Pkp2;Axin2;Slc9a1	Mief2;Osgin1;Cdkn2aip;Upf1;Cd36;Ppan
GO:0008037	cell recognition	BP	43	0.000265657	1	1	0.111579	Crtac1;Fcgr3;Dock8;Mfge8;Lgals3			Cd36
GO:0023014	signal transduction by phosphorylation	BP	388	0.000139264	0.502162	0.0925077	0.113879	Tgfb1;Plvap;Prkcdbp;Arl6ip5;Agt;Sfrp5;Thbs1;Cyr61;Vegfb;Ret;Ccl11;Mdfic;Cd74;Adam9;Dusp9;C1qtnf1	Ret	Jak2;Sfrp5;Mapk6;Lep;Apc	Med1;Cd36;Gadd45a
GO:0009605	response to external stimulus	BP	814	2.07975e-06	0.756932	0.968466	0.114476	Fcgr3;Anxa5;C1qtnf1;Hp;Ccl6;Lgals3;Ccl11;Ear2;Pf4;Cnn2;Rarres2;Serpine2;Thbs1;Adamts5;Tgfb1;Ctss;Adam9;Cyr61;Map1lc3a;Slit3;Anxa3;Ace;Agt;Wfdc21;Vegfb;Cd74;Ptafr;Cdh13;Anxa2;Rnasel	Spp1	Jak2;Lep	Trim11;Sik1;Ppan;Med1;Cd36
GO:0016525	negative regulation of angiogenesis	BP	44	0.000533716	0.0610221	0.240399	0.114583	Agt;Thbs2;Rgcc;Pf4;Thbs1	Sparc	Thbs2	Cd36
GO:0007275	multicellular organismal development	BP	2331	5.40715e-05	0.0469399	0.0033717	0.134944	Ret;Lrg1;Fgfrl1;Srpx2;Rarres2;Ccl11;Sfrp5;Anxa2;Ace;Gas7;Tgfb1;Peg3;Agt;Cdh13;Aldh1a1;Npr3;Lgals3;Ercc2;Atxn10;Hp;Thbs1;Cited2;Islr2;Rgcc;Anxa3;Trpv2;Crtac1;Phgdh;Serpine2;Slit3;Cyr61;Papss2;Mfge8;Cdkn1c;Dmrt2;C1qc;Vnn1;Adap2;Lmo4;Vegfb;Meox2;Chrdl1;Thbs2;Lox;Peg10;Alg10b;Pf4;Cnn2;Hmox1;Cela1;Lipa;Lgals1;Cd74	Ret;Sparc;Ugt8a;Arhgap24;AW551984;Adamts2;Spp1;Cd83	Smoc1;Upf2;Homer1;Sfrp5;H2-Aa;Lep;Yy1;Npr3;Apcdd1;Axin2;Vldlr;Pkp2;Jak2;Clu;Icosl;Dmrt2;Zfr;Nipbl;Slc9a1;H2-Ab1;Thbs2;Lox;Apc;Cd79a;Zfp260	Casp7;Med1;Sik1;Dct;Zbtb18;Rest;Trim11;Cd36;Cdk13;Rbm47
GO:0030193	regulation of blood coagulation	BP	48	0.000757776	1	1	0.135334	Serpine2;Anxa2;Anxa5;Thbs1;C1qtnf1			Cd36
GO:1900046	regulation of hemostasis	BP	48	0.000757776	1	1	0.135334	Thbs1;C1qtnf1;Serpine2;Anxa5;Anxa2			Cd36
GO:0048518	positive regulation of biological process	BP	2537	0.000103249	0.137276	0.0698827	0.13546	Plvap;Hp;Lgals3;C1qc;Tril;Cela1;Btc;Islr2;C1qtnf1;Ctss;Rarres2;Thbs1;Rgcc;Lmo4;Ercc2;Srpx2;Plekha2;Mfge8;Mmp12;Lrg1;Cyr61;Tgfb1;Rnasel;Cited2;Anxa2;Vegfb;Ace;Anxa5;Trpv2;Anxa3;Cd1d2;Prkcdbp;Hmox1;Cd74;Ret;Ccl11;Fcgr3;Serpine2;Adam9;Ptafr;Thbs2;Lgals1;Vnn1;Arid2;Myo1c;Abcg1;Arl6ip5;Agt;Cdh13;Pf4;Mdfic;Dmrt2;Cnn2;Cfp;Aldh1a1;Meox2	Mrap2;Pmch;Spp1;Ret;Akap12;Sparc;Cd83	Jak2;H2-Aa;Smoc1;Nipbl;H2-Ab1;Osbpl8;Apc;Prmt2;Cd79b;Vldlr;Cd79a;Slc9a1;Trim12c;Clu;Axin2;Icosl;Lep;Thbs2;Yy1;Akap12;Dmrt2;Homer1	Gadd45a;Zbtb38;Med1;Oaz1;Mief2;Trim11;Casp7;Rest;Cd36;Dct;Cdkn2aip
GO:0004867	serine-type endopeptidase inhibitor activity	MF	37	1.95734e-05	1	0.000422562	0.143285	Serpina3n;Agt;Serpine2;Crim1;Itih5;Serpina3c		Serpina3n;Itih5;Serpina3c	Serpinb1a
GO:0052547	regulation of peptidase activity	BP	203	0.000194127	0.272838	0.035963	0.151188	Serpina3n;Serpina3c;Ret;Itih5;Thbs1;Agt;Arl6ip5;Pcolce2;Serpine2;Cyr61;Timp4	Ret	Serpina3n;Serpina3c;Itih5;Jak2	Rest;Serpinb1a
GO:0022603	regulation of anatomical structure morphogenesis	BP	475	5.85818e-07	0.210795	0.0774747	0.154404	Lrg1;Cited2;Vegfb;Thbs1;Dmrt2;Sfrp5;Ret;Gas7;Ccl11;Thbs2;Rgcc;Tgfb1;Anxa3;Srpx2;Cdc42ep3;Adam9;Agt;Trpv2;Islr2;Pf4;Hmox1;Palmd	Sparc;Ret	Axin2;Dmrt2;Apc;Sfrp5;Thbs2;Epb4.1l2	Cd36;Med1;Mief2
GO:0001525	angiogenesis	BP	251	1.44046e-07	0.0605485	0.796386	0.167784	Vegfb;Lrg1;Meox2;Srpx2;Thbs1;Hmox1;Anxa3;Thbs2;Ace;Mfge8;Cyr61;Ccl11;Rgcc;Pf4;Anxa2;Agt;Cdh13	Arhgap24;Sparc	Thbs2	Med1;Cd36
GO:0032502	developmental process	BP	2757	5.57666e-06	0.0406576	0.00195966	0.178449	C1qc;Atxn10;Tgfb1;Peg3;Anxa2;Thbs1;Phgdh;Sfrp5;Prelp;Mfge8;Cyr61;Cdkn1c;Mmp12;Lrg1;Ret;Cited2;Lmo4;Abcg1;Npr3;Papss2;Lgals3;Vegfb;Gas7;Serpine2;Mustn1;Btc;Agt;Ercc2;Cnn2;Islr2;Adap2;Rarres2;Srpx2;Rgcc;Mrc2;Thbs2;Lgals1;Adam9;Dmrt2;Lipa;Anxa3;Peg10;Pf4;Meox2;Slit3;Crtac1;Ccl11;Cdh13;Hmox1;Aldh1a1;Cd74;Cdc42ep3;Trpv2;Fgfrl1;Ace;Chrdl1;Wfdc21;Lox;Alg10b;Hp;Palmd;Vnn1;Cela1	Adamts2;Spp1;Sparc;Ret;AW551984;Ugt8a;Arhgap24;Cd83;Tanc1	Apc;Homer1;Pkp2;Lep;Apcdd1;H2-Aa;Sfrp5;Clu;Prelp;Prmt2;Yy1;Nipbl;Slc9a1;Npr3;Osbpl8;Axin2;Smoc1;Jak2;Vldlr;Thbs2;Dmrt2;Cd79a;Icosl;Zfr;Epb4.1l2;Upf2;Lox;H2-Ab1;Zfp260	Zbtb18;Trim11;Cdk13;Sik1;Med1;Cd36;Rest;Casp7;Dct;Mief2;Rbm47
GO:0061041	regulation of wound healing	BP	66	0.000333474	1	1	0.18101	Vegfb;Anxa2;Serpine2;Thbs1;C1qtnf1;Anxa5			Cd36
GO:0006955	immune response	BP	440	0.000273523	1	0.00586407	0.193691	Tril;Fcgr3;Tgfb1;Cd74;Ccl6;Ccl11;Rgcc;Anxa3;Cd1d2;Lgals1;Crlf2;C1qc;Vnn1;Lgals3;Pf4;Cfp;Ptafr;Hmox1		H2-Eb1;Trim12c;Cd79b;H2-Ab1;Jak2;H2-Aa;Cd79a;Icosl	Med1;Trim11;Cd36
GO:0004866	endopeptidase inhibitor activity	MF	64	5.59938e-05	1	0.00324771	0.218363	Serpina3c;Timp4;Agt;Serpine2;Itih5;Serpina3n;Crim1		Serpina3c;Itih5;Serpina3n	Serpinb1a
GO:0030414	peptidase inhibitor activity	MF	65	6.6689e-05	1	0.00364806	0.218363	Serpine2;Serpina3n;Itih5;Serpina3c;Timp4;Agt;Crim1		Serpina3n;Itih5;Serpina3c	Serpinb1a
GO:0032879	regulation of localization	BP	1114	6.13868e-06	0.639169	0.165317	0.223368	Tmem37;Thbs1;Myo1c;Plvap;Lgals3;Mest;Srpx2;Mfge8;Rarres2;Sfrp5;Trpv2;Adam9;Anxa3;Cd74;Ccl11;Ret;Anxa2;Anxa5;Agt;Cdh13;Tgfb1;Cyr61;C1qtnf1;Rgcc;Cited2;Arl6ip5;Mdfic;Fcgr3;Vegfb;Abcg1;Serpine2;Ace;Cnn2;Hmox1	Ret;Sparc	Apc;Sncg;Homer1;Osbpl8;Mest;Axin2;Sfrp5;Pkp2;Lep;Jak2	Oaz1;Sik1;Rest;Med1;Cd36
GO:0048514	blood vessel morphogenesis	BP	312	6.62862e-07	0.0877547	0.865206	0.227948	Ace;Anxa2;Rgcc;Srpx2;Thbs1;Cited2;Meox2;Anxa3;Mfge8;Lrg1;Agt;Vegfb;Hmox1;Thbs2;Cyr61;Ccl11;Pf4;Cdh13	Sparc;Arhgap24	Thbs2	Med1;Cd36
GO:0061135	endopeptidase regulator activity	MF	70	9.31021e-05	1	0.00453608	0.232051	Agt;Serpina3n;Timp4;Serpina3c;Crim1;Serpine2;Itih5		Serpina3n;Serpina3c;Itih5	Serpinb1a
GO:0032101	regulation of response to external stimulus	BP	292	0.000164661	1	0.565292	0.234205	Ctss;Serpine2;Agt;Thbs1;Vegfb;Anxa2;Rarres2;Cd74;Anxa5;Fcgr3;Tgfb1;Ace;C1qtnf1;Cdh13		Lep;Jak2	Cd36;Med1
GO:0006909	phagocytosis	BP	77	0.000204807	1	1	0.234822	Cd302;Fcgr3;Tgfb1;Thbs1;Cnn2;Mfge8;Anxa3			Cd36
GO:0060560	developmental growth involved in morphogenesis	BP	100	0.000364443	1	0.472095	0.234822	Ccl11;Sfrp5;Tgfb1;Thbs1;Slit3;Trpv2;Islr2		Sfrp5	Med1
GO:0006952	defense response	BP	485	1.61676e-07	1	0.0841283	0.238023	Hp;Anxa3;Tgfb1;Vnn1;Cfp;Lgals3;Ccl11;Adamts5;Agt;Cela1;Cd74;Crlf2;Rnasel;Lipa;Fcgr3;Hmox1;Serpina3n;C1qc;Rarres2;Ctss;Ace;Cd1d2;Tril;Thbs1;Ptafr		Jak2;Trim12c;H2-Ab1;H2-Eb1;Serpina3n;H2-Aa	Trim11;Cd36;Med1
GO:0080134	regulation of response to stress	BP	525	0.000253423	1	0.256609	0.23893	Tril;Hp;Serpine2;Fbln5;Ctss;Ace;Thbs1;Ptafr;Cd74;Fcgr3;Agt;Sfrp5;Anxa5;Vnn1;C1qtnf1;Arl6ip5;Anxa2;Vegfb;Mdfic		Jak2;Clu;Axin2;Sfrp5;Trim12c	Med1;Gadd45a;Cd36
GO:0002252	immune effector process	BP	275	2.79275e-05	1	0.525179	0.2455	Cd74;Fcgr3;Lgals1;Crlf2;Cd1d2;Cfp;Rnasel;C1qc;Tgfb1;Lgals3;Rgcc;Anxa3;Tril;Ace;Hmox1		Icosl;H2-Ab1	Trim11;Cd36
GO:0009725	response to hormone	BP	315	0.0653804	0.0983883	0.000831521	0.264384	Lox;Tgfb1;Cited2;Adam9;Rarres2;Hmox1;Serpina3n;Serpina3c	Ugt8a;Spp1	Jak2;Lox;Lep;Prmt2;Slc9a1;Osbpl8;Serpina3n;Serpina3c	Rest;Med1
GO:0043408	regulation of MAPK cascade	BP	327	0.000926319	1	0.149482	0.264384	Cyr61;Mdfic;Cd74;Agt;Dusp9;Vegfb;Thbs1;Sfrp5;Arl6ip5;Prkcdbp;C1qtnf1;Tgfb1;Adam9		Lep;Apc;Jak2;Sfrp5	Gadd45a;Cd36
GO:0001568	blood vessel development	BP	351	8.87399e-07	0.110445	0.666215	0.275731	Vegfb;Lrg1;Mfge8;Anxa3;Agt;Thbs1;Pf4;Thbs2;Ccl11;Srpx2;Ace;Cyr61;Cited2;Anxa2;Hmox1;Lox;Rgcc;Cdh13;Meox2	Arhgap24;Sparc	Thbs2;Lox	Cd36;Med1
GO:0008285	negative regulation of cell proliferation	BP	340	0.00303467	0.448325	0.000311727	0.275731	Tgfb1;Npr3;Slit3;Hmox1;Cdh13;Serpine2;Agt;Thbs1;Wisp2;Rgcc;Fgfrl1;Sfrp5	Sparc	Apc;Npr3;H2-Ab1;Jak2;H2-Aa;Wisp2;Axin2;Sfrp5;Pkp2	Rest;Med1
GO:0061134	peptidase regulator activity	MF	92	7.02028e-05	1	0.0112617	0.276869	Pcolce2;Serpina3c;Crim1;Serpine2;Serpina3n;Itih5;Agt;Timp4		Serpina3c;Serpina3n;Itih5	Serpinb1a
GO:0048584	positive regulation of response to stimulus	BP	839	1.39336e-05	0.164199	0.0402765	0.282348	Lgals1;Fcgr3;C1qc;Prkcdbp;Mdfic;Arl6ip5;Vegfb;Cd74;Rgcc;Cdh13;Myo1c;Lgals3;C1qtnf1;Ptafr;Pf4;Cyr61;Cited2;Hmox1;Thbs1;Tril;Ace;Rarres2;Ret;Ctss;Cfp;Cd1d2;Tgfb1;Lrg1;Agt	Pmch;Ret;Akap12	Jak2;Cd79a;Slc9a1;Clu;Cd79b;Trim12c;Osbpl8;Lep;Akap12;H2-Ab1	Cd36;Cdkn2aip;Med1;Gadd45a
GO:0044767	single-organism developmental process	BP	2737	4.36636e-06	0.0390719	0.00170691	0.285947	Agt;Abcg1;Cited2;Vegfb;Sfrp5;Anxa3;Lmo4;Mmp12;Thbs1;Anxa2;Prelp;Ret;Ercc2;Cdkn1c;Gas7;Ace;Cyr61;Fgfrl1;Pf4;Lrg1;Tgfb1;Srpx2;Mfge8;Hp;Npr3;Chrdl1;Slit3;Rgcc;Ccl11;Vnn1;Atxn10;Peg10;Thbs2;Mustn1;Rarres2;Adap2;Serpine2;Peg3;Meox2;Islr2;Aldh1a1;Lgals3;Adam9;Lgals1;Cdh13;Lox;Cd74;Crtac1;Lipa;Mrc2;Papss2;Hmox1;C1qc;Palmd;Cela1;Trpv2;Wfdc21;Btc;Cnn2;Cdc42ep3;Dmrt2;Phgdh;Alg10b	Ret;Spp1;AW551984;Arhgap24;Sparc;Ugt8a;Adamts2;Cd83;Tanc1	Prmt2;Smoc1;Sfrp5;Prelp;Clu;H2-Aa;Jak2;Pkp2;Lep;Npr3;Osbpl8;Yy1;Cd79a;Icosl;Thbs2;Apcdd1;Vldlr;Axin2;Lox;Epb4.1l2;H2-Ab1;Nipbl;Slc9a1;Upf2;Homer1;Zfp260;Apc;Dmrt2;Zfr	Casp7;Zbtb18;Rest;Cdk13;Dct;Sik1;Trim11;Rbm47;Med1;Cd36
GO:0001944	vasculature development	BP	374	5.06231e-07	0.124537	0.438238	0.29464	Mfge8;Cited2;Srpx2;Anxa3;Hmox1;Cyr61;Vegfb;Agt;Lrg1;Thbs2;Cdh13;Ccl11;Meox2;Ace;Anxa2;Lox;Pf4;Rgcc;Thbs1;Sfrp5	Sparc;Arhgap24	Thbs2;Lox;Sfrp5	Cd36;Med1
GO:0045765	regulation of angiogenesis	BP	116	1.3528e-06	0.167097	0.513233	0.294882	Vegfb;Lrg1;Pf4;Hmox1;Srpx2;Anxa3;Thbs1;Agt;Ccl11;Thbs2;Rgcc	Sparc	Thbs2	Cd36
GO:0045785	positive regulation of cell adhesion	BP	111	0.000214732	0.0134756	0.030498	0.297282	Lgals1;Cited2;Cyr61;Plekha2;Cdh13;Thbs1;Adam9;Ret	Spp1;Ret	Apc;Jak2;Smoc1	Cd36
GO:0009897	external side of plasma membrane	CC	127	1.27902e-05	0.166799	0.000937903	0.311021	Serpine2;Cd74;Anxa5;Cd1d2;Abcg1;Lgals3;Ace;Thbs1;Mfge8;Cdh13;Adam9	Cd83	H2-Ab1;Cd79a;Cd79b;H2-Aa;Icosl	Cd36
GO:1901342	regulation of vasculature development	BP	124	2.58311e-06	0.183632	0.541998	0.31152	Thbs2;Hmox1;Agt;Ccl11;Lrg1;Thbs1;Rgcc;Srpx2;Pf4;Vegfb;Anxa3	Sparc	Thbs2	Cd36
GO:0051239	regulation of multicellular organismal process	BP	1269	4.98484e-05	0.0690148	0.0125353	0.313422	Anxa3;C1qc;C1qtnf1;Trpv2;Cited2;Tgfb1;Lrg1;Lgals3;Thbs1;Ret;Cd1d2;Ccl11;Thbs2;Srpx2;Tril;Rgcc;Anxa5;Vnn1;Vegfb;Anxa2;Serpine2;Ace;Hmox1;Dmrt2;Cyr61;Ctss;Cd74;Lgals1;Agt;Adam9;Sfrp5;Islr2;Anxa6;Pf4;Fcgr3	Cd83;Spp1;Ret;Pmch;Sparc	Jak2;Apc;Lep;Axin2;Nipbl;H2-Aa;Smoc1;Thbs2;Icosl;Slc9a1;Vldlr;Clu;Dmrt2;Pkp2;Sfrp5	Cd36;Rest;Med1;Trim11;Dct
GO:0007596	blood coagulation	BP	110	0.000191788	1	1	0.316204	Anxa2;Anxa5;Thbs1;Serpine2;F13a1;Pf4;C1qtnf1;Papss2			Cd36
GO:0007599	hemostasis	BP	112	0.000214732	1	1	0.320856	F13a1;Serpine2;Anxa5;Anxa2;Papss2;Pf4;C1qtnf1;Thbs1			Cd36
GO:0050817	coagulation	BP	112	0.000214732	1	1	0.320856	Papss2;Pf4;F13a1;Serpine2;Anxa2;Thbs1;Anxa5;C1qtnf1			Cd36
GO:1901681	sulfur compound binding	MF	128	8.82585e-05	1	0.17345	0.335845	Thbs2;Thbs1;Pf4;Cyr61;Vegfb;Prelp;Serpine2;Fgfrl1;Pcolce2		Thbs2;Prelp	Sult2a3
GO:0044707	single-multicellular organism process	BP	2898	3.68315e-08	0.00610127	0.0158165	0.355448	Map1a;Npr3;Lmo4;Cdkn1c;Thbs1;Abcg1;Anxa2;Agt;Slit3;Vegfb;Cited2;Fgfrl1;Atxn10;Lgals1;Rgcc;Hp;Btc;Tgfb1;Serpine2;Sfrp5;Chrdl1;Lrg1;Tril;Dock8;Mfge8;Cd1d2;Cd74;Cyr61;Anxa3;Anxa6;Gas7;Islr2;Lipa;Ptafr;Phgdh;Trpv2;Dmrt2;Rarres2;C1qtnf1;Srpx2;F13a1;Crtac1;Hmox1;Peg3;Anxa5;Ace;Pf4;Fcgr3;Adam9;Abat;Ret;Meox2;Ercc2;Cdh13;Lox;Ccl11;C1qc;Thbs2;Mrc2;Adap2;Cnn2;Lgals3;Aldh1a1;Papss2;Alg10b;Man2b1;Crlf2;Vnn1;…	Ugt8a;Adamts2;Arhgap24;AW551984;Sparc;Mrap2;Pmch;Ret;Cd83;Tanc1;Spp1	Smoc1;Npr3;Jak2;Acta2;Apc;Sfrp5;Apcdd1;Icosl;Slc9a1;Axin2;Dmrt2;Vldlr;Cd79a;Lep;Nipbl;H2-Aa;Lox;Yy1;Upf2;Pkp2;Thbs2;Zfr;Homer1;Clu;Zfp260;H2-Ab1;Sncg	Cdk13;Cd36;Zbtb18;Rest;Casp7;Med1;Trim11;Rbm47;Sik1;Dct
GO:0065008	regulation of biological quality	BP	1606	0.000170579	0.162908	0.0358784	0.364849	Serpine2;Syp;Arl6ip5;Mt2;Ace;Mt1;Abat;Cd74;Thbs1;Ctss;Ehd3;Gas7;Anxa2;Trpv2;Npr3;Pf4;Btc;Abcg1;Ercc2;Mest;Srpx2;Islr2;Agt;Ccl11;C1qtnf1;Anxa5;Tln2;Hmox1;F13a1;Palmd;Tgfb1;Papss2;Cited2;Ret;Cdc42ep3;Thbs2;Aldh1a1;Ric3;Lipa	Ugt8a;Pmch;Spp1;Ret;Mrap2	Apc;Homer1;Osbpl8;Jak2;Slc9a1;Acta2;Sncg;Pkp2;Lep;Npr3;Clu;Epb4.1l2;Mest;Axin2;Ranbp2;Thbs2	Zbtb18;Med1;Cdkn2aip;Slc12a7;Rest;Cd36
GO:0044421	extracellular region part	CC	2130	5.41537e-11	0.254009	0.00185313	0.377724	Hebp1;Abat;Wisp2;Cyb5r1;Serpine2;Serpina3c;Lgals3;Adam9;Crim1;Loxl1;Aldh1a1;Lipa;Adamts5;Lrg1;Ccl6;Mgst3;Vnn1;Mfge8;Crtac1;Ace;Hp;Vegfb;Prelp;Pcolce2;Srpx2;C1qtnf1;Akr1b8;Lgals1;Thbs1;Anxa2;Arl6ip5;Tgfb1;Gstk1;Myo1c;Ctss;Slc7a8;Fcgr3;Lox;Anxa5;Mest;Atxn10;Wfdc21;Man2b1;Cd74;Tubb2a;Anxa6;Cdh13;Cnn2;Thbs2;Blvra;Timp4;F13a1;Pf4;Slit3;Mmp12;Sucnr1;C1qc;Aldh3b1;Agt;Npr3;Phgdh;Anxa3;Rarres2;Ccl11;Serpi…	Pmch;Spp1;Adamts2;Sparc;Ddc	Sncg;Slc9a1;Wisp2;Cd79b;Nipbl;Vldlr;Lep;Serpina3c;Sod3;Smoc1;H2-Eb1;Prelp;Clu;Uggt1;Icosl;Lox;Mest;Thbs2;Acta2;Sucnr1;Epb4.1l2;Npr3;Wdr60;Serpina3n	Zbtb38;Cd36;Zbtb18;Cdk13;B4galt5;Tdp2;A1bg;Serpinb1a
GO:0032501	multicellular organismal process	BP	2960	9.53408e-08	0.00717813	0.0209207	0.38463	Atxn10;C1qtnf1;Anxa3;Srpx2;Map1a;C1qc;Anxa2;Abcg1;Npr3;Tril;Tgfb1;Thbs1;Islr2;Papss2;Cyr61;Lrg1;Slit3;Trpv2;Rgcc;Adap2;Cited2;Meox2;Ret;Aldh1a1;Agt;Sfrp5;Ercc2;Cdkn1c;Mfge8;Gas7;Serpine2;Fcgr3;Lgals3;F13a1;Ptafr;Abat;Ctss;Anxa5;Lipa;Cnn2;Crlf2;Mrc2;Cd74;Hp;Lmo4;Thbs2;Crtac1;Lgals1;Peg3;Man2b1;Dmrt2;Vegfb;Ace;Pf4;Cdh13;Cd1d2;Fgfrl1;Adam9;Ccl11;Hmox1;Peg10;Btc;Vnn1;Chrdl1;Rarres2;Dock8;Cela1;Alg10b…	Adamts2;Spp1;Sparc;Ugt8a;Ret;Mrap2;Pmch;AW551984;Arhgap24;Cd83;Tanc1	Apc;Smoc1;Apcdd1;Vldlr;Lep;Npr3;Acta2;Nipbl;Cd79a;H2-Ab1;Axin2;Yy1;Sfrp5;Jak2;Pkp2;Slc9a1;Homer1;Thbs2;Clu;Dmrt2;Zfr;Sncg;Icosl;Upf2;H2-Aa;Zfp260;Lox	Med1;Zbtb18;Cdk13;Cd36;Casp7;Dct;Rest;Rbm47;Sik1;Trim11
GO:0042127	regulation of cell proliferation	BP	738	0.000134449	0.731018	0.00256861	0.386574	Cdh13;Ccl11;Serpine2;Tgfb1;Cela1;Slit3;Npr3;Rgcc;Cyr61;Fgfrl1;Cnn2;Btc;Agt;Anxa2;Lrg1;Hmox1;Wisp2;Lgals3;Sfrp5;Cd74;Mmp12;Vegfb;Pf4;Thbs1	Sparc	Icosl;Lep;Axin2;Npr3;Wisp2;H2-Ab1;Clu;Sfrp5;Apc;H2-Aa;Pkp2;Jak2	Dct;Med1;Rest
GO:0005488	binding	MF	7299	0.000854634	0.725225	0.0223212	0.392508	Vegfb;C1qtnf1;Rgcc;C1qc;Wisp2;Cdh13;Gcsh;Ear2;Hr;Atxn10;Anxa3;Hebp1;Cyr61;Myo1c;Hspb7;Dmrt2;Abcg1;Lmo4;Mmp12;Cdkn1c;Mdfic;Fgfrl1;Gas7;Hp;Ptafr;F13a1;Anxa5;Prelp;Dclk3;Lgals1;Retnla;Npr3;Gfpt2;Ccl6;Ercc2;Plekha2;Crim1;Agt;Folh1;Loxl1;Plvap;Cd302;Blvra;Lgals3;Arl6ip5;Mfge8;Thbs1;Synpo2;Mt2;Ehd3;Islr2;Thbs2;Crlf2;Rnasel;Ret;Tril;Vnn1;Mrc2;Cdc42ep3;Prrg3;Slit3;Hnrnpa3;Tgfb1;Igkv4-55;Adap2;Gstk1;Papss…	Spp1;Irs4;Adamts2;Tceanc2;Pmch;Akap12;Ret;Sparc;Ddc;Hist1h1c;Mrap2	Smoc1;Wisp2;Phf20l1;Prmt2;Fads3;H2-Eb1;Osbpl8;Apc;Dmrt2;Sp100;Apcdd1;Acta2;Tank;Erbb2ip;Homer1;Prelp;Clu;Epb4.1l2;Ranbp2;Yy1;Npr3;Icosl;Ascc3;Jak2;Eif3a;Cd79b;Uggt1;Hivep2;Lep;Dhx15;Trim12c;Akap12;Thbs2;Ubxn2a;H2-Ab1;H2-Aa;Lox;Zfr;Cd79a;Vldlr;Nipbl;Pkp2;Smurf2;Axin2;Sorbs2;Mapk6;Sod3;Sncg;Slc9a1;Zfp260;Sfrp5	Cdk13;Rest;Ppan;Cd36;Zbtb38;B4galt5;Sult2a3;Pi4k2b;Cdkn2aip;Gadd45a;Zbtb18;Med1;Sik1;Oaz1;Casp7;Osgin1;Trim11;Thrsp;Bahd1;Dct;Slc12a7;Tdp2;Rbm47;Upf1;Irx1
GO:0098552	side of membrane	CC	173	0.000132664	0.23044	0.0038896	0.400237	Cd74;Mfge8;Serpine2;Ace;Thbs1;Adam9;Cdh13;Lgals3;Abcg1;Anxa5;Cd1d2	Cd83	Cd79a;H2-Ab1;Cd79b;Icosl;H2-Aa	Cd36
GO:0051716	cellular response to stimulus	BP	2948	0.0143838	0.0599295	0.000889746	0.408471	Plvap;Ret;Dock8;Agt;Hmox1;C1qtnf1;Lgals3;Rgcc;Sfrp5;Dusp9;Thbs1;Ccl6;Cd74;Btc;Ptafr;Syp;Myo1c;Vegfb;Cited2;Tril;Dclk3;Slit3;Mdfic;Pf4;Npr3;Ercc2;Adam9;Rarres2;Chrdl1;Sucnr1;Hp;Fbln5;Peg10;Mt2;Cdh13;Ccl11;Fcgr3;Vnn1;Prkcdbp;Cyr61;Mt1;Serpine2;Cela1;Aldh3b1;Cd68;Lrg1;Fgfrl1;Map1lc3a;Cnn2;Tgfb1;Arl6ip5;Lgals1;Adap2;Anxa2	Ret;Akap12;Arhgap24;Spp1;Sparc;Ugt8a;Gabrq;Irs4;Pmch	Homer1;Smoc1;Smurf2;Usp28;Sfrp5;Apcdd1;Jak2;Akap12;Prmt2;Cd79b;Lep;Sod3;Apc;Hivep2;Npr3;Trim12c;Tank;Cd79a;Osbpl8;Sucnr1;H2-Ab1;Nipbl;Axin2;Yy1;Ascc3;Icosl;Clu;Ppfibp1;Mapk6;Slc9a1;Vldlr	Gadd45a;Sik1;Ppan;Med1;Upf1;Cd36;Tdp2;Cdkn2aip;Rest;Casp7
GO:0006950	response to stress	BP	1618	3.57298e-11	0.502153	0.00232394	0.437515	Vnn1;C1qtnf1;Hspb7;Tril;C1qc;Sfrp5;Adamts5;Lgals3;Mustn1;Rarres2;Agt;Cd1d2;Aldh1a1;Arl6ip5;Mt2;Tgfb1;Trpv2;Cited2;Adam9;Rnasel;Anxa5;Cd74;Hmox1;Cnn2;F13a1;Anxa2;Cela1;Lox;Ccl11;Ercc2;Rgcc;Thbs1;Serpina3n;Aldh3b1;Fcgr3;Anxa3;Papss2;Vegfb;Map1lc3a;Crlf2;Pf4;Mt1;Tsc22d2;Hp;Ace;Mmp12;Ctss;Serpine2;Ptafr;Lipa;Fbln5;Mdfic;Abat;Cyr61;Ret;Cfp	Arhgap24;Pmch;Ret	Jak2;Apc;Usp28;Sod3;Sfrp5;Ascc3;Trim12c;Slc9a1;Lox;H2-Eb1;Serpina3n;Yy1;Clu;Nipbl;Prmt2;H2-Aa;H2-Ab1;Vldlr;Axin2;Upf2	Med1;Trim11;Tdp2;Gadd45a;Cd36;Upf1
GO:1903034	regulation of response to wounding	BP	180	0.000506307	1	0.691108	0.439353	Agt;Anxa2;C1qtnf1;Ctss;Anxa5;Serpine2;Fcgr3;Thbs1;Vegfb;Ace		Jak2	Cd36
GO:0005576	extracellular region	CC	2289	7.14604e-16	0.317719	0.000316565	0.456766	Ccl6;Thbs1;Lgals3;C1qtnf1;Timp4;Wisp2;Adamts5;Mgst3;Anxa2;Cyb5r1;Gstk1;Mfge8;Itih5;Tgfb1;Pcolce2;Svep1;Hp;Akr1b8;Arl6ip5;Srpx2;C1qc;Lrg1;Ccl11;Anxa3;Rarres2;Ace;Chrdl1;Slit3;Phgdh;Serpina3c;Prelp;Anxa5;Loxl1;Cela1;Lgals1;Npr3;F13a1;Tubb2a;Fbln5;Slc7a8;Serpine2;Adam9;Hebp1;Vegfb;Myo1c;Lox;Cyr61;Pf4;Ctss;Fcgr3;Crtac1;Mmp12;Sucnr1;Thbs2;Cnn2;Atxn10;Retnla;Blvra;Crim1;Cd74;Serpina3n;Lipa;Cdh13;Prrg3;…	Adamts2;Ddc;Sparc;Spp1;Pmch	Sod3;Wisp2;Lep;Acta2;Itih5;Serpina3c;Prelp;Cd79b;Smoc1;Npr3;Uggt1;Sncg;Nipbl;H2-Eb1;Lox;Epb4.1l2;Sucnr1;Thbs2;Clu;Vldlr;Serpina3n;Wdr60;Icosl;Mest;Sfrp5;Slc9a1;Glb1l2	Cd36;Zbtb38;Serpinb1a;Cdk13;B4galt5;Zbtb18;A1bg;Tdp2
GO:0042060	wound healing	BP	183	1.17075e-08	0.245451	0.693205	0.463847	Serpine2;Anxa2;Mmp12;Tgfb1;Lox;Mustn1;Hmox1;F13a1;Papss2;Cyr61;C1qtnf1;Anxa5;Thbs1;Pf4;Vegfb;Cnn2	Arhgap24	Lox	Cd36
GO:0030155	regulation of cell adhesion	BP	210	6.50667e-05	0.049953	0.148689	0.483759	Cyr61;Serpine2;Rgcc;Lgals1;Thbs1;Adam9;Plekha2;Ret;Tgfb1;Cited2;Cdh13;C1qtnf1	Ret;Spp1	Jak2;Smoc1;Apc	Cd36
GO:0040017	positive regulation of locomotion	BP	208	1.06422e-07	0.0479256	0.39152	0.485533	Rarres2;Thbs1;Tgfb1;Cyr61;Srpx2;Ccl11;Myo1c;Cdh13;Anxa3;Vegfb;Plvap;Lgals3;Adam9;Agt;Ret;Cd74	Sparc;Ret	Apc;Jak2	Trim11
GO:0048646	anatomical structure formation involved in morphogenesis	BP	588	4.2837e-07	0.00264056	0.516678	0.499098	Hmox1;Mfge8;Dmrt2;Sfrp5;Vegfb;Thbs1;Cited2;Lrg1;Meox2;Cdh13;Adam9;Anxa2;Ace;Pf4;Anxa3;Rgcc;Ercc2;Thbs2;Cyr61;Lmo4;Ccl11;Aldh1a1;Agt;Ret;Srpx2	Arhgap24;Tanc1;Ugt8a;Sparc;Ret	Dmrt2;Sfrp5;Axin2;Thbs2	Cd36;Med1
GO:0007154	cell communication	BP	2588	0.0153565	0.0358174	0.000390123	0.506465	Slit3;Cd74;Plvap;Ptafr;Fgfrl1;Dusp9;C1qtnf1;Dock8;Myo1c;Syp;Abat;Sfrp5;Vnn1;Mt2;Agt;Chrdl1;Hmox1;Adam9;Cela1;Tgfb1;Thbs2;Cyr61;Pf4;Peg10;Cdh13;Lrg1;Fcgr3;Arl6ip5;Prkcdbp;Sucnr1;Npr3;Ret;Vegfb;Btc;Cited2;Dclk3;Thbs1;Lgals3;Adap2;Mdfic;Lgals1;Mt1;Map1lc3a;Tril;Ric3;Ccl11;Serpine2;Srpx2	Ddc;Sparc;Akap12;Irs4;Pmch;Ret;Arhgap24;Ugt8a;Gabrq	Smoc1;Usp28;Jak2;Apcdd1;Sfrp5;Homer1;Slc9a1;Cd79b;Lep;Apc;Clu;Pkp2;Tank;Akap12;Axin2;Thbs2;Prmt2;Osbpl8;Vldlr;Sucnr1;Npr3;Cd79a;Trim12c;Smurf2;Hivep2;Ppfibp1;Mapk6;Icosl;Sncg	Gadd45a;Casp7;Rest;Ppan;Sik1;Cdkn2aip;Cd36;Med1
GO:0044763	single-organism cellular process	BP	6008	5.09599e-06	0.0123322	0.0162629	0.508705	Map1a;Plvap;Hp;C1qtnf1;Agt;Cyr61;Vegfb;Lmo4;Wisp2;Lrg1;Btc;Thbs1;Mfge8;Dock8;Palmd;Slit3;Dusp9;Atxn10;Npr3;Trpv2;Abcg1;Tgfb1;Rgcc;Slc7a8;Sfrp5;Vnn1;Crlf2;Gas7;Mmp12;Crim1;Aldh1a1;Anxa3;C1qc;Cdkn1c;Adam9;Anxa6;Fgfrl1;Prelp;Map1lc3a;Serpine2;Gfpt2;Ercc2;Cdh13;Arid2;Ccl6;Srpx2;Pf4;Syp;Tln2;Ccl11;Cd1d2;Hebp1;Phgdh;Hmox1;Lgals3;Tmem37;Fbln5;Emp1;Aldh3b1;Mt2;Cnn2;Fam107a;Fcgr3;Folh1;Blvra;Thbs2;Mdfic;M…	Arhgap24;Ugt8a;Spp1;Crls1;Cd83;AW551984;Akap12;Adamts2;Mrap2;Irs4;Ret;Pmch;Ddc;Tanc1;Sparc;Gabrq	Osbpl8;Wisp2;Apcdd1;Cd79b;Jak2;Usp28;Npr3;Slc9a1;Sfrp5;Pds5a;Vldlr;Prmt2;Smoc1;Fads3;Homer1;Apc;Prelp;Icosl;Trim12c;Cd79a;Akap12;Wdr60;Uggt1;Emp1;Lep;Thbs2;Lox;Ranbp2;Hivep2;H2-Aa;Smurf2;H2-Ab1;Ascc3;Clu;Sod3;Sucnr1;Mapk6;Tank;Axin2;Nipbl;Yy1;Epb4.1l2;Sorbs2;Pkp2;Ppfibp1;Sncg;Nedd9	Rest;Ppan;Oaz1;Zbtb18;Dct;Slc12a7;Casp7;Sik1;Rbm47;Gadd45a;Cdkn2aip;Cd36;Tdp2;Aqp8;Trim11;Thrsp;Osgin1;Med1;Upf1
GO:0008283	cell proliferation	BP	925	9.75578e-05	0.806774	0.000682732	0.543374	Btc;Anxa2;Thbs1;Cdh13;Sfrp5;Npr3;Cited2;Lipa;Rgcc;Ercc2;Hmox1;Cela1;Tgfb1;Cnn2;Serpine2;Mmp12;Cyr61;Lrg1;Slit3;Wisp2;Pf4;Ccl11;Fgfrl1;Cd74;Agt;Dock8;Lgals3;Vegfb	Sparc	H2-Aa;Ascc3;Sfrp5;Npr3;Jak2;Icosl;Clu;Pkp2;Apc;Lep;Wisp2;Cd79a;Usp28;H2-Ab1;Axin2	Med1;Rest;Dct
GO:0034097	response to cytokine	BP	246	0.0353374	1	0.000158132	0.575987	Cd74;Serpina3n;Adam9;Wfdc21;Pf4;Plvap;Serpina3c;Slit3		Lep;Jak2;Serpina3n;Prmt2;H2-Aa;Serpina3c;H2-Eb1;H2-Ab1	Med1
GO:0001816	cytokine production	BP	266	0.000344339	0.330492	0.247078	0.584709	Tgfb1;Rgcc;Hmox1;Thbs1;Pf4;Lipa;Crlf2;Fcgr3;Agt;Cd74;Cd1d2;Tril;Ptafr	Cd83	Jak2;Icosl;Clu	Cd36
GO:0050896	response to stimulus	BP	3660	6.34556e-08	0.00270848	5.45424e-05	0.615419	Plvap;Sfrp5;Slit3;Ear2;Hspb7;C1qtnf1;Cited2;Btc;Abcg1;Rgcc;Thbs1;Ccl6;Anxa3;C1qc;Cdh13;Serpina3c;Agt;Dusp9;Cela1;Ccl11;Cd1d2;Srpx2;Pf4;Mmp12;Mt2;Vegfb;Myo1c;Cd74;Anxa2;Ercc2;Hp;Trpv2;Adamts5;Mustn1;Tgfb1;Adap2;Ctss;Ptafr;Lipa;Cnn2;Lgals3;Syp;Anxa5;Arl6ip5;Papss2;Ret;Fbln5;Fcgr3;Fgfrl1;Man2b1;Hmox1;Cd68;Rarres2;Mdfic;Cyr61;Dclk3;Lgals1;Vnn1;F13a1;Abat;Dock8;Rnasel;Aldh3b1;Adam9;Mt1;Lox;Prkcdbp;Lrg…	Arhgap24;Sparc;Spp1;Ugt8a;Ret;Irs4;Tanc1;Cd83;Ddc;Pmch;Akap12;Gabrq;Mrap2	Sfrp5;Homer1;Slc9a1;H2-Eb1;Osbpl8;Smoc1;Apc;Apcdd1;Usp28;H2-Ab1;Serpina3c;Prmt2;Cd79b;Upf2;Sod3;Nipbl;Tank;H2-Aa;Icosl;Jak2;Trim12c;Axin2;Lep;Clu;Smurf2;Yy1;Vldlr;Ascc3;Cd79a;Lox;Akap12;Hivep2;Sncg;Ppfibp1;Mapk6;Npr3;Mest;Serpina3n;Sucnr1	Rest;Trim11;Gadd45a;Ppan;Med1;Cdkn2aip;Cd36;Casp7;Sik1;Tdp2;Upf1
GO:0070887	cellular response to chemical stimulus	BP	986	2.40963e-06	0.077292	0.09661	0.622948	Anxa2;Myo1c;Fgfrl1;Tgfb1;Vegfb;Cdh13;Arl6ip5;Syp;Fbln5;Rarres2;Adam9;Ret;Cited2;Hmox1;Peg10;Ptafr;Lrg1;Plvap;Cd74;Slit3;Thbs1;Hp;Mt1;Vnn1;Pf4;Ccl6;Fcgr3;Agt;Rgcc;Cd68;Aldh3b1;Lgals3;Ccl11	Sparc;Spp1;Ret;Ugt8a	Jak2;Smurf2;H2-Ab1;Sod3;Slc9a1;Axin2;Prmt2;Osbpl8;Lep;Vldlr	Cd36;Rest;Med1
GO:0002684	positive regulation of immune system process	BP	285	6.40474e-06	0.345044	0.00904168	0.630944	Cd74;Vnn1;Rarres2;Cfp;Cd1d2;Fcgr3;Plvap;Lgals3;Thbs1;Rgcc;Ptafr;Lgals1;Tril;C1qc;Vegfb;Tgfb1;Hmox1	Cd83	H2-Ab1;Icosl;Cd79a;Cd79b;Trim12c;H2-Aa	Cd36
GO:0023052	signaling	BP	2526	0.0161049	0.0317508	0.000249223	0.635344	Slit3;Cited2;Serpine2;Syp;Ccl11;Dusp9;Agt;Fgfrl1;C1qtnf1;Arl6ip5;Fcgr3;Tgfb1;Srpx2;Cela1;Thbs1;Abat;Dclk3;Ret;Prkcdbp;Lgals1;Ptafr;Cdh13;Mt2;Vegfb;Sfrp5;Lgals3;Tril;Plvap;Sucnr1;Hmox1;Cd74;Btc;Npr3;Vnn1;Adap2;Thbs2;Myo1c;Mt1;Dock8;Mdfic;Cyr61;Adam9;Lrg1;Pf4;Chrdl1;Ric3;Peg10	Ugt8a;Akap12;Ret;Pmch;Arhgap24;Irs4;Sparc;Ddc;Gabrq	Smoc1;Osbpl8;Cd79b;Usp28;Prmt2;Apcdd1;Axin2;Akap12;Icosl;Vldlr;Slc9a1;Lep;Cd79a;Apc;Jak2;Smurf2;Sfrp5;Sncg;Sucnr1;Homer1;Npr3;Pkp2;Thbs2;Trim12c;Tank;Mapk6;Ppfibp1;Clu;Hivep2	Cd36;Med1;Casp7;Rest;Cdkn2aip;Sik1;Gadd45a
GO:0044700	single organism signaling	BP	2526	0.0161049	0.0317508	0.000249223	0.635344	Agt;C1qtnf1;Dusp9;Tril;Syp;Plvap;Dock8;Lgals3;Serpine2;Fgfrl1;Ret;Cited2;Lrg1;Adap2;Cyr61;Myo1c;Ptafr;Abat;Hmox1;Npr3;Mt2;Adam9;Tgfb1;Lgals1;Pf4;Mdfic;Cela1;Chrdl1;Btc;Cdh13;Cd74;Vnn1;Slit3;Arl6ip5;Ric3;Dclk3;Sfrp5;Fcgr3;Vegfb;Prkcdbp;Thbs2;Ccl11;Mt1;Peg10;Srpx2;Thbs1;Sucnr1	Arhgap24;Ddc;Ugt8a;Ret;Sparc;Irs4;Akap12;Pmch;Gabrq	Prmt2;Usp28;Jak2;Apcdd1;Cd79b;Homer1;Sncg;Osbpl8;Npr3;Lep;Smurf2;Cd79a;Tank;Icosl;Slc9a1;Akap12;Apc;Trim12c;Axin2;Smoc1;Sfrp5;Vldlr;Clu;Thbs2;Mapk6;Hivep2;Pkp2;Ppfibp1;Sucnr1	Cd36;Med1;Sik1;Cdkn2aip;Rest;Gadd45a;Casp7
GO:0009611	response to wounding	BP	322	7.99177e-08	0.407406	0.610216	0.652149	Anxa2;F13a1;Fcgr3;Ace;Mustn1;Lox;Papss2;Vegfb;Serpine2;Pf4;Ctss;Anxa5;Hmox1;Thbs1;Cyr61;Agt;Tgfb1;Cnn2;Mmp12;C1qtnf1	Arhgap24	Lox;Jak2	Cd36
GO:0005515	protein binding	MF	4601	0.000768685	0.289414	6.69909e-05	0.655484	Vegfb;Cdh13;Myo1c;C1qc;Hspb7;Atxn10;Cd74;Arl6ip5;Map1a;Wisp2;Lgals1;Fcgr3;Ccl6;Ctss;Map1lc3a;Rarres2;Rgcc;Anxa3;Synpo2;Cited2;Mdfic;Cdkn1c;Plekha2;Ace;Prkcdbp;C1qtnf1;Plvap;Islr2;Mfge8;Npr3;Fgfrl1;Gas7;Loxl1;Anxa5;Tln2;Lrg1;Ret;Syp;Cyr61;Agt;Tpm4;Srpx2;Fez2;Hr;Thbs2;Retnla;Slit3;Anxa6;Ehd3;Aldh1a1;Fbln5;Tgfb1;Cdc42ep3;Lgals3;Ubqln2;Pcolce2;Cnn2;Arid2;Lmo4;Hp;Anxa2;Pf4;Palmd;Gcsh;Dmrt2;Serpine2;Cr…	Akap12;Irs4;Ddc;Spp1;Ret;Pmch;Hist1h1c;Sparc;Mrap2	Acta2;Apcdd1;Pkp2;H2-Eb1;Wisp2;Uggt1;Apc;Eif3a;Akap12;Mapk6;Nipbl;Sp100;Homer1;Erbb2ip;Epb4.1l2;Slc9a1;Npr3;Osbpl8;H2-Ab1;Lep;Vldlr;Cd79b;Axin2;Icosl;Thbs2;Jak2;H2-Aa;Tank;Dhx15;Sorbs2;Dmrt2;Ranbp2;Prmt2;Trim12c;Smurf2;Yy1;Lox;Sod3;Ubxn2a;Clu;Cd79a;Sncg;Sfrp5	Rest;Trim11;Slc12a7;Cd36;Cdk13;Sik1;Zbtb38;Thrsp;Casp7;Med1;Osgin1;Cdkn2aip;Gadd45a;Oaz1
GO:0010033	response to organic substance	BP	1042	4.50299e-05	0.0261667	0.000199511	0.662088	Ret;Serpina3n;Thbs1;Syp;Cd74;Anxa5;Serpina3c;Abat;Wfdc21;Cdh13;Lrg1;Hmox1;Lox;Aldh1a1;Cited2;Vegfb;Plvap;Tgfb1;Cd68;Rarres2;Mest;Peg10;Adam9;Slit3;Ptafr;Ace;Fgfrl1;Myo1c;Abcg1;Pf4;Agt	Ret;Spp1;Ugt8a;Cd83;Sparc	Serpina3n;H2-Ab1;Lep;Serpina3c;Homer1;Jak2;Smurf2;Lox;H2-Eb1;Upf2;Mest;Osbpl8;Axin2;Slc9a1;H2-Aa;Clu;Prmt2	Cd36;Med1;Rest
GO:0009986	cell surface	CC	363	1.74626e-07	0.126115	0.00165164	0.662309	Abcg1;Mfge8;Cd74;Tgfb1;Wisp2;Ctss;Trpv2;Adam9;Lgals1;Cd1d2;Anxa5;Lgals3;Serpine2;Anxa2;Srpx2;Thbs1;Ace;Plvap;Mrc2;Cdh13;Islr2	Sparc;Cd83	Wisp2;Vldlr;H2-Aa;Slc9a1;Cd79b;Icosl;H2-Ab1;Cd79a	Cd36
GO:0005102	receptor binding	MF	734	4.49004e-07	0.0266058	0.0250826	0.696429	Wisp2;Ccl6;Cd74;Tgfb1;C1qc;Agt;Ace;Srpx2;Map1lc3a;Ccl11;Vegfb;Ric3;Serpine2;Pf4;Anxa5;Hr;Mfge8;Rarres2;Slit3;Tln2;Btc;Cyr61;Lrg1;Thbs1;Myo1c;Retnla;Crlf2;Adam9;Gstk1	Pmch;Irs4;Spp1;Mrap2	Wisp2;Homer1;Icosl;Erbb2ip;Jak2;Lep;Ubxn2a;Smurf2;Prmt2	Med1;Osgin1
GO:0008289	lipid binding	MF	350	0.000217855	1	0.871095	0.697462	Mfge8;Anxa5;Adap2;Plekha2;Myo1c;Anxa3;Cd1d2;Ptafr;Syp;Anxa6;Anxa2;Thbs1;Vnn1;Tril;Map1lc3a		Osbpl8	Cd36
GO:0040012	regulation of locomotion	BP	400	3.87437e-07	0.156285	0.253405	0.709934	Lgals3;Ret;Cyr61;Rarres2;Cdh13;Adam9;Thbs1;Cnn2;Plvap;Ace;Anxa3;Myo1c;Anxa5;Cd74;Rgcc;Ccl11;Cited2;Vegfb;Agt;Tgfb1;Srpx2	Ret;Sparc	Apc;Osbpl8;Jak2;Pkp2	Trim11
GO:0007165	signal transduction	BP	2306	0.0254057	0.117709	0.000951443	0.710268	Tril;Syp;Dusp9;Ptafr;Serpine2;Lgals3;Plvap;Thbs1;Vegfb;Mt2;Peg10;Dock8;Agt;Myo1c;Fcgr3;Chrdl1;Cela1;Vnn1;Cd74;Cdh13;Adam9;Prkcdbp;Sfrp5;Cyr61;Cited2;Slit3;Lrg1;Sucnr1;Lgals1;Tgfb1;Fgfrl1;Adap2;Arl6ip5;Dclk3;Ret;Hmox1;C1qtnf1;Mt1;Pf4;Ccl11;Mdfic;Npr3;Btc	Pmch;Irs4;Arhgap24;Gabrq;Akap12;Ret;Sparc	Apcdd1;Jak2;Prmt2;Axin2;Apc;Cd79b;Usp28;Icosl;Slc9a1;Clu;Homer1;Smoc1;Sfrp5;Tank;Trim12c;Sucnr1;Vldlr;Cd79a;Hivep2;Lep;Akap12;Smurf2;Osbpl8;Npr3;Ppfibp1;Mapk6	Sik1;Gadd45a;Casp7;Cdkn2aip;Med1;Cd36
GO:0044459	plasma membrane part	CC	874	0.00047942	0.0889387	0.00403878	0.721514	Anxa5;Ret;Myo1c;Cdh13;Sgce;Prkcdbp;Adam9;Cd74;Folh1;Abcg1;Mfge8;C1qtnf1;Ace;Srpx2;Syp;Anxa2;Plvap;Trpv2;Cd1d2;Fgfrl1;Lgals3;Serpine2;Anxa6;Hmox1;Thbs1	Ret;Cd83;Gabrq;Tanc1	Apc;Jak2;H2-Eb1;Cd79a;Slc9a1;Homer1;H2-Aa;Cd79b;Erbb2ip;Apcdd1;Icosl;H2-Ab1	Aqp8;Cd36
GO:0009653	anatomical structure morphogenesis	BP	1297	2.975e-06	0.0794797	0.307076	0.733637	Ace;Thbs1;Tgfb1;Lrg1;Cited2;Ret;Lmo4;Meox2;Slit3;Vegfb;Trpv2;Ccl11;Cela1;Lipa;Thbs2;Sfrp5;Dmrt2;Islr2;Pf4;Hmox1;Cdh13;Anxa2;Srpx2;Anxa3;Mmp12;Ercc2;Adam9;Mfge8;Palmd;Cyr61;Cdkn1c;Gas7;Aldh1a1;Agt;Fgfrl1;Cdc42ep3;Serpine2;Rgcc	Arhgap24;Ret;Ugt8a;Sparc;Tanc1	Yy1;Axin2;Clu;Thbs2;Sfrp5;Dmrt2;Nipbl;Apc;Pkp2;Epb4.1l2	Med1;Mief2;Cd36
GO:0044699	single-organism process	BP	6804	2.08888e-07	0.0495973	0.0060995	0.73624	Cyr61;Rgcc;Gfpt2;Gas7;Fgfrl1;C1qtnf1;Lmo4;Npr3;Tgfb1;Map1a;Dock8;Plvap;Cdkn1c;Trpv2;Peg3;Prelp;Abcg1;Slit3;Aldh1a1;Loxl1;Slc7a8;C1qc;Aldh3b1;Hr;Hmox1;Thbs2;Arl6ip5;Srpx2;Atxn10;Adam9;Abat;F13a1;Dusp9;Ret;Tmem37;Fbln5;Anxa5;Cd1d2;Fcgr3;Folh1;Cyb5r1;Btc;Cnn2;Adap2;Hnrnpa3;Hp;Papss2;Mgst3;Lgals3;Serpine2;Wisp2;Lipa;Ccl6;Anxa6;Islr2;Rarres2;Syp;Chrdl1;Crlf2;Agt;Vegfb;G6pd2;Meox2;Sfrp5;Lgals1;Lox;Anxa…	Ugt8a;Crls1;Arhgap24;Adamts2;Ret;Spp1;Sparc;Cd83;Mrap2;Ddc;Akap12;AW551984;Tanc1;Gabrq;Irs4;Pmch	Osbpl8;Apcdd1;Npr3;Smoc1;Cd79b;Acta2;Prelp;Thbs2;Ascc3;Lep;Apc;Icosl;Usp28;Prmt2;Wdr60;Wisp2;Cd79a;Upf2;Fads3;Hivep2;Mapk6;Vldlr;Epb4.1l2;Yy1;Sfrp5;Clu;Lox;Homer1;Pkp2;Uggt1;Pds5a;Akap12;Emp1;Slc9a1;Jak2;Ranbp2;Erbb2ip;Sorbs2;Sod3;Axin2;Trim12c;Sucnr1;H2-Ab1;H2-Aa;Tank;Dmrt2;Zfr;Zfp260;Nipbl;Ppfibp1;Nedd9;Smurf2;Sncg	Casp7;Ppan;Slc12a7;Cd36;Rest;Sik1;Med1;Zbtb18;Dct;Cdk13;Cdkn2aip;Aqp8;Thrsp;Trim11;Gadd45a;Osgin1;Oaz1;Upf1;Tdp2;Rbm47
GO:0007155	cell adhesion	BP	522	3.82893e-06	0.257888	0.00118803	0.791663	Svep1;Agt;Cyr61;Cited2;Vnn1;Rgcc;Cdh13;Srpx2;Fbln5;Plekha2;C1qtnf1;Tln2;Lgals1;Thbs1;Thbs2;Serpine2;Ret;Wisp2;Tgfb1;Nedd9;Mfge8;Adam9	Spp1;Ret	Ppfibp1;Lep;Sorbs2;Thbs2;Apc;Jak2;Wisp2;Smoc1;Pkp2;Nedd9	Cd36
GO:0022610	biological adhesion	BP	525	4.29584e-06	0.258512	0.00124548	0.794592	Svep1;Srpx2;Serpine2;Cyr61;Nedd9;Ret;Thbs2;Agt;C1qtnf1;Thbs1;Cited2;Rgcc;Lgals1;Adam9;Cdh13;Plekha2;Tln2;Tgfb1;Fbln5;Mfge8;Vnn1;Wisp2	Spp1;Ret	Nedd9;Thbs2;Jak2;Lep;Ppfibp1;Smoc1;Sorbs2;Apc;Pkp2;Wisp2	Cd36
GO:0048583	regulation of response to stimulus	BP	1728	2.40944e-05	0.35501	0.116353	0.808824	Cited2;Serpine2;Cd74;Tril;Myo1c;Arl6ip5;Rarres2;Cyr61;Ctss;C1qc;Fcgr3;Hmox1;Peg10;Lgals1;C1qtnf1;Vnn1;Dusp9;Adap2;Vegfb;Rgcc;Sfrp5;Ace;Thbs1;Lgals3;Hp;Anxa5;Mdfic;Ptafr;Ccl11;Pf4;Cdh13;Tgfb1;Chrdl1;Anxa2;Adam9;Prkcdbp;Agt;Slit3;Fgfrl1;Fbln5;Cd1d2;Syp;Ret;Cfp;Lrg1	Pmch;Arhgap24;Ret;Akap12	H2-Ab1;Prmt2;Apcdd1;Apc;Cd79b;Slc9a1;Sfrp5;Osbpl8;Trim12c;Cd79a;Jak2;Clu;Lep;Axin2;Akap12	Cd36;Gadd45a;Cdkn2aip;Med1
GO:0042221	response to chemical	BP	1440	3.1063e-08	0.0295334	0.00101271	0.857035	Ear2;Plvap;Tgfb1;Rgcc;Slit3;Rarres2;Serpina3c;Cyr61;Hmox1;Cd74;Ret;Agt;Anxa5;Ccl6;Abcg1;Cited2;Arl6ip5;Thbs1;Lgals3;Mt2;Ccl11;Aldh1a1;Vnn1;Syp;Fgfrl1;Hp;Aldh3b1;Vegfb;Lox;Adam9;Mest;Mt1;Ptafr;Abat;Cd68;Anxa2;Myo1c;Fcgr3;Pf4;Ace;Lrg1;Fbln5;Wfdc21;Peg10;Cdh13;Serpina3n	Ugt8a;Sparc;Ret;Spp1;Ddc;Cd83	Jak2;Osbpl8;Serpina3c;Homer1;Clu;Prmt2;Vldlr;Lox;Lep;Mest;H2-Eb1;H2-Aa;Upf2;Sod3;Axin2;Slc9a1;Smurf2;H2-Ab1;Serpina3n	Med1;Cd36;Rest
GO:0040011	locomotion	BP	737	3.74991e-07	0.0421429	0.168752	0.891671	Plvap;Cdh13;Ear2;Cnn2;Vegfb;Ccl6;Anxa3;Anxa5;Adam9;Ret;Srpx2;Dock8;Lgals3;Thbs1;Pf4;Rarres2;Agt;Ace;Mmp12;Tgfb1;Myo1c;Cd74;Ccl11;Rgcc;Ptafr;Cyr61;Slit3;Cited2;Fcgr3	Ret;Spp1;Arhgap24;Sparc	Sorbs2;Jak2;Apc;Osbpl8;Apcdd1;Lep;Pkp2	Trim11
GO:0031988	membrane-bounded vesicle	CC	2086	2.16989e-06	0.700649	0.0144424	0.925504	Mgst3;Ace;C1qc;Pf4;Cyb5r1;Wisp2;Anxa2;Syp;Rarres2;Adam9;Lgals3;Crtac1;Thbs1;Hp;Cd74;Mest;Tubb2a;Thbs2;Npr3;Anxa6;Crim1;Pcolce2;Gstk1;Cnn2;Serpine2;Myo1c;Serpina3c;Prelp;Tgfb1;Mfge8;Loxl1;Anxa5;Fbln5;Sucnr1;Hebp1;Lrg1;Akr1b8;Aldh3b1;Aldh1a1;Agt;Man2b1;Ehd3;Fcgr3;Anxa3;Abat;Lipa;Phgdh;Arl6ip5;Cdh13;Vnn1;Serpina3n;Lgals1;Slc7a8;Blvra	Spp1;Ddc;Sparc	Nipbl;Wisp2;H2-Eb1;Cd79b;Axin2;Mest;Thbs2;Clu;Slc9a1;Npr3;Uggt1;Serpina3c;Wdr60;Prelp;Sucnr1;Sncg;Epb4.1l2;Sod3;Acta2;Icosl;Serpina3n	B4galt5;A1bg;Serpinb1a;Dct
GO:0005886	plasma membrane	CC	1957	0.000191789	0.166259	0.000646342	0.93754	Atxn10;Anxa5;Plvap;Srpx2;C1qtnf1;Sfrp5;Wisp2;Plekha2;Abcg1;Folh1;Fcgr3;Mfge8;Emp1;Anxa2;Crlf2;Adap2;Myo1c;Ptafr;Thbs1;Tln2;Anxa6;Ace;Trpv2;Cdh13;Ubqln2;Serpine2;Slc7a8;Vnn1;Cd1d2;Prkcdbp;Cd74;Ehd3;Adam9;Anxa3;Lgals3;Fgfrl1;Hmox1;Alg10b;Cd68;Aldh3b1;Ret;Sgce;Btc;Syp;Sucnr1;Islr2	Irs4;Cd83;Mrap2;Ret;Tanc1;Gabrq	Apc;Apcdd1;Erbb2ip;Sfrp5;Wisp2;Pkp2;Cd79b;Axin2;Cd79a;H2-Eb1;Emp1;Homer1;H2-Aa;Jak2;Slc9a1;H2-Ab1;Pds5a;Icosl;Epb4.1l2;Sorbs2;Smurf2;Sucnr1;Sncg	Cd36;Slc12a7;Aqp8
GO:0071944	cell periphery	CC	2021	4.848e-05	0.182566	0.00105702	0.947302	Adam9;Fgfrl1;Myo1c;Sfrp5;C1qtnf1;Anxa3;Abcg1;Atxn10;Ace;Sucnr1;Prkcdbp;Anxa5;Wisp2;Cdh13;Serpine2;Btc;Ptafr;Islr2;Ehd3;Tpm4;Vnn1;Plvap;Trpv2;Hmox1;Plekha2;Folh1;Lgals3;Emp1;Alg10b;Mfge8;Cd1d2;Cd302;Crlf2;Cd74;Ret;Ubqln2;Aldh3b1;Srpx2;Anxa2;Thbs1;Cd68;Tln2;Anxa6;Sgce;Slc7a8;Adap2;Fcgr3;Syp;Sept8	Cd83;Ret;Irs4;Tanc1;Mrap2;Gabrq	Erbb2ip;Cd79a;Sfrp5;Sucnr1;Cd79b;Apcdd1;Wisp2;Smurf2;Axin2;Apc;Homer1;Emp1;Pkp2;H2-Eb1;Icosl;Pds5a;H2-Aa;Sncg;Slc9a1;Sorbs2;Epb4.1l2;H2-Ab1;Jak2	Aqp8;Cd36;Slc12a7
GO:0031982	vesicle	CC	2232	7.88928e-06	0.751468	0.029044	0.947781	Pf4;C1qc;Ace;Fcgr3;Syp;Prelp;Myo1c;Cyb5r1;Arl6ip5;Wisp2;Crtac1;Serpina3c;Phgdh;Vnn1;Hp;Ehd3;Abat;Mgst3;Tubb2a;Pcolce2;Mest;Lrg1;Cd74;Serpine2;Cnn2;Map1lc3a;Agt;Lgals1;Thbs2;Hebp1;Adam9;Sucnr1;Loxl1;Anxa5;Mfge8;Gstk1;Rarres2;Akr1b8;Blvra;Fbln5;Tgfb1;Lipa;Crim1;Man2b1;Anxa3;Aldh1a1;Lgals3;Anxa6;Aldh3b1;Serpina3n;Npr3;Cdh13;Slc7a8;Thbs1;Anxa2	Spp1;Ddc;Sparc	H2-Eb1;Prelp;Axin2;Sncg;Cd79b;Wisp2;Nipbl;Serpina3c;Icosl;Epb4.1l2;Slc9a1;Mest;Clu;Uggt1;Thbs2;Sucnr1;Sod3;Acta2;Wdr60;Serpina3n;Npr3	B4galt5;A1bg;Serpinb1a;Dct
GO:0070062	extracellular vesicular exosome	CC	1799	1.28143e-05	0.808798	0.0137466	0.949953	Adam9;Hebp1;Anxa3;Hp;Serpina3c;Lgals1;Slc7a8;Npr3;Pcolce2;Arl6ip5;Anxa5;Phgdh;Mfge8;Cyb5r1;Rarres2;Crtac1;Thbs1;C1qc;Akr1b8;Gstk1;Lrg1;Blvra;Fbln5;Lipa;Agt;Aldh1a1;Ace;Man2b1;Wisp2;Anxa2;Cdh13;Mest;Abat;Tubb2a;Myo1c;Cnn2;Vnn1;Crim1;Serpina3n;Prelp;Aldh3b1;Sucnr1;Anxa6;Mgst3;Fcgr3;Lgals3;Cd74	Ddc;Spp1	Cd79b;Icosl;Serpina3c;Npr3;Sod3;Acta2;Epb4.1l2;Uggt1;Slc9a1;Wdr60;Nipbl;Clu;Wisp2;H2-Eb1;Mest;Serpina3n;Prelp;Sucnr1;Sncg	B4galt5;A1bg;Serpinb1a
GO:0043230	extracellular organelle	CC	1802	1.35563e-05	0.809069	0.0139923	0.950526	Anxa5;Serpina3c;Mfge8;Vnn1;Anxa2;Abat;Cyb5r1;Prelp;Mgst3;Crtac1;Blvra;Arl6ip5;Adam9;Ace;Rarres2;Tubb2a;Thbs1;Lipa;Crim1;Akr1b8;Lgals1;Slc7a8;Sucnr1;Fbln5;Man2b1;Wisp2;Phgdh;Cnn2;Hebp1;Anxa6;C1qc;Lrg1;Lgals3;Cd74;Myo1c;Mest;Aldh1a1;Agt;Npr3;Gstk1;Hp;Aldh3b1;Pcolce2;Cdh13;Fcgr3;Anxa3;Serpina3n	Ddc;Spp1	Cd79b;Sncg;Serpina3c;Slc9a1;Prelp;Uggt1;Wdr60;Sucnr1;Sod3;Wisp2;Acta2;Clu;Epb4.1l2;Mest;Npr3;H2-Eb1;Icosl;Nipbl;Serpina3n	B4galt5;A1bg;Serpinb1a
GO:0065010	extracellular membrane-bounded organelle	CC	1802	1.35563e-05	0.809069	0.0139923	0.950526	Arl6ip5;Adam9;Serpina3c;Anxa5;Cdh13;Anxa2;Lgals1;Anxa3;Cyb5r1;Vnn1;Mfge8;Phgdh;Mest;Ace;Fcgr3;Wisp2;Aldh1a1;Akr1b8;Slc7a8;Lrg1;Fbln5;Man2b1;Blvra;Pcolce2;C1qc;Agt;Crim1;Npr3;Myo1c;Hp;Hebp1;Lipa;Thbs1;Rarres2;Prelp;Tubb2a;Abat;Mgst3;Lgals3;Anxa6;Gstk1;Crtac1;Cnn2;Serpina3n;Aldh3b1;Cd74;Sucnr1	Ddc;Spp1	H2-Eb1;Serpina3c;Mest;Wisp2;Sncg;Uggt1;Npr3;Clu;Epb4.1l2;Acta2;Icosl;Prelp;Wdr60;Cd79b;Slc9a1;Sod3;Serpina3n;Nipbl;Sucnr1	Serpinb1a;A1bg;B4galt5
GO:0001667	ameboidal cell migration	BP	178	0.000750298	0.0357326	1	1	Agt;Cdh13;Rgcc;Anxa3;Tgfb1;Thbs1;Adam9;Srpx2;Ret	Sparc;Ret
GO:0001775	cell activation	BP	396	6.3002e-05	0.469584	0.00317265	1	Tgfb1;Rgcc;Lgals3;Dock8;Thbs1;Adam9;C1qtnf1;Fcgr3;Anxa3;Cd74;Vnn1;Cd1d2;Pf4;Serpine2;Lgals1;Lmo4;Hmox1;Agt	Cd83	H2-Ab1;Icosl;Clu;Cd79a;H2-Aa;Jak2;Apc;Lep
GO:0001935	endothelial cell proliferation	BP	68	0.000359892	0.106688	1	1	Thbs1;Lrg1;Ccl11;Cdh13;Rgcc;Vegfb	Sparc
GO:0001936	regulation of endothelial cell proliferation	BP	61	0.000172454	0.0962246	1	1	Vegfb;Cdh13;Lrg1;Thbs1;Rgcc;Ccl11	Sparc
GO:0002443	leukocyte mediated immunity	BP	132	0.000272113	1	0.19795	1	Crlf2;Tgfb1;C1qc;Ace;Anxa3;Cd74;Hmox1;Fcgr3;Cd1d2		Icosl;H2-Ab1
GO:0002478	antigen processing and presentation of exogenous peptide antigen	BP	20	0.02544	1	0.000149319	1	Cd74;Fcgr3		H2-Eb1;H2-Aa;H2-Ab1
GO:0002495	antigen processing and presentation of peptide antigen via MHC class II	BP	17	0.212439	1	5.97933e-05	1	Cd74		H2-Eb1;H2-Ab1;H2-Aa
GO:0002504	antigen processing and presentation of peptide or polysaccharide antigen via MHC class II	BP	18	0.02544	1	7.73606e-05	1	Thbs1;Cd74		H2-Aa;H2-Eb1;H2-Ab1
GO:0002685	regulation of leukocyte migration	BP	63	0.000772409	1	1	1	Rarres2;Plvap;Cd74;Thbs1;Lgals3;Vegfb
GO:0002687	positive regulation of leukocyte migration	BP	46	0.000119406	1	1	1	Thbs1;Rarres2;Cd74;Lgals3;Plvap;Vegfb
GO:0003281	ventricular septum development	BP	31	0.000688873	1	1	1	Cyr61;Lmo4;Cited2;Fgfrl1
GO:0003330	regulation of extracellular matrix constituent secretion	BP	3	0.00017227	1	1	1	Rgcc;Agt
GO:0003331	positive regulation of extracellular matrix constituent secretion	BP	3	0.00017227	1	1	1	Rgcc;Agt
GO:0005509	calcium ion binding	MF	258	8.05346e-07	0.0739847	0.168776	1	Thbs2;Svep1;Anxa3;Sgce;Ehd3;Fbln5;Slit3;Crtac1;Prrg3;Anxa5;Mmp12;Anxa2;Ret;Thbs1;Cdh13;Anxa6	Ret;Sparc	Thbs2;Vldlr;Smoc1
GO:0005518	collagen binding	MF	43	1.10924e-06	0.0509218	1	1	Map1a;Mrc2;Thbs1;Pcolce2;C1qtnf1;Ctss;Adam9	Sparc
GO:0005539	glycosaminoglycan binding	MF	92	9.44241e-06	1	0.0940698	1	Fgfrl1;Thbs2;Serpine2;Vegfb;Pf4;Cyr61;Prelp;Thbs1;Pcolce2		Thbs2;Prelp
GO:0005543	phospholipid binding	MF	202	3.77827e-05	1	1	1	Mfge8;Thbs1;Adap2;Anxa3;Myo1c;Map1lc3a;Plekha2;Anxa5;Anxa6;Vnn1;Ptafr;Anxa2
GO:0005544	calcium-dependent phospholipid binding	MF	18	6.70371e-05	1	1	1	Anxa6;Anxa5;Anxa3;Anxa2
GO:0005578	proteinaceous extracellular matrix	CC	153	1.79086e-05	0.0239027	0.0155593	1	Lgals3;Anxa2;Adamts5;Mmp12;Crtac1;Loxl1;Prelp;Lgals1;Lox;Thbs2;Tgfb1	Sparc;Adamts2	Prelp;Smoc1;Lox;Thbs2
GO:0006928	cellular component movement	BP	798	1.25954e-05	0.0131626	0.218997	1	Fcgr3;Cnn2;Rgcc;Ccl6;Dock8;Plvap;Adam9;Cyr61;Thbs1;Agt;Cdh13;Slit3;Tgfb1;Ret;Pf4;Vegfb;Anxa5;Anxa3;Mmp12;Myo1c;Ace;Rarres2;Srpx2;Cd74;Lgals3;Cited2;Ccl11	Ret;Sparc;Arhgap24;Spp1;Ugt8a	Apc;Jak2;Apcdd1;Lep;Pkp2;Sorbs2;Osbpl8
GO:0006935	chemotaxis	BP	222	7.70498e-07	0.338365	1	1	Rarres2;Ear2;Ccl6;Vegfb;Slit3;Ccl11;Cdh13;Tgfb1;Cyr61;Lgals3;Thbs1;Fcgr3;Cd74;Pf4;Ptafr	Spp1
GO:0006954	inflammatory response	BP	246	5.60276e-07	1	0.44944	1	Rarres2;Vnn1;Fcgr3;Ace;Lipa;Serpina3n;Cela1;Ctss;Hp;Tril;Agt;Tgfb1;Thbs1;Ccl11;Ptafr;Hmox1;Crlf2		Jak2;Serpina3n
GO:0007062	sister chromatid cohesion	BP	22	1	1	0.00029822	1			Axin2;Pds5a;Nipbl
GO:0007162	negative regulation of cell adhesion	BP	77	0.000144285	1	0.399854	1	Tgfb1;Rgcc;Serpine2;Lgals1;Cdh13;Thbs1;C1qtnf1		Jak2
GO:0007260	tyrosine phosphorylation of STAT protein	BP	29	1	1	0.000740052	1			Jak2;Lep;Prmt2
GO:0007262	STAT protein import into nucleus	BP	6	1	1	0.00043273	1			Lep;Jak2
GO:0008201	heparin binding	MF	71	7.91749e-07	1	0.06335	1	Pcolce2;Thbs2;Fgfrl1;Prelp;Serpine2;Vegfb;Thbs1;Cyr61;Pf4		Thbs2;Prelp
GO:0010038	response to metal ion	BP	107	0.000796897	1	0.138898	1	Abat;Mt1;Adam9;Mt2;Anxa5;Hmox1;Thbs1		Sod3;Homer1
GO:0010273	detoxification of copper ion	BP	4	0.000512335	1	1	1	Mt2;Mt1
GO:0010594	regulation of endothelial cell migration	BP	63	0.000333474	0.100723	1	1	Srpx2;Anxa3;Thbs1;Rgcc;Tgfb1;Agt	Sparc
GO:0010595	positive regulation of endothelial cell migration	BP	38	0.000189219	0.0610221	1	1	Thbs1;Anxa3;Agt;Tgfb1;Srpx2	Sparc
GO:0010631	epithelial cell migration	BP	125	0.000384814	0.19043	1	1	Agt;Anxa3;Thbs1;Srpx2;Rgcc;Adam9;Cdh13;Tgfb1	Sparc
GO:0010632	regulation of epithelial cell migration	BP	89	0.000284354	0.143127	1	1	Rgcc;Agt;Thbs1;Anxa3;Adam9;Srpx2;Tgfb1	Sparc
GO:0010634	positive regulation of epithelial cell migration	BP	55	9.82658e-05	0.0886799	1	1	Agt;Thbs1;Adam9;Tgfb1;Anxa3;Srpx2	Sparc
GO:0016337	single organismal cell-cell adhesion	BP	182	0.000374297	0.281353	0.105754	1	Cyr61;Cited2;Lgals1;Ret;C1qtnf1;Serpine2;Srpx2;Vnn1;Tgfb1;Rgcc	Ret	Jak2;Lep;Pkp2
GO:0016477	cell migration	BP	605	1.18874e-06	0.0203014	0.0795958	1	Tgfb1;Plvap;Dock8;Anxa3;Vegfb;Srpx2;Ret;Fcgr3;Agt;Mmp12;Thbs1;Ace;Ccl6;Rgcc;Lgals3;Adam9;Cd74;Cdh13;Rarres2;Cnn2;Myo1c;Cited2;Ccl11;Pf4;Cyr61	Ret;Sparc;Spp1;Arhgap24	Apcdd1;Jak2;Sorbs2;Apc;Pkp2;Osbpl8;Lep
GO:0019815	B cell receptor complex	CC	6	1	1	0.000254567	1			Cd79b;Cd79a
GO:0019834	phospholipase A2 inhibitor activity	MF	5	0.000541725	1	1	1	Anxa2;Anxa3
GO:0019884	antigen processing and presentation of exogenous antigen	BP	26	0.00416173	1	0.000399033	1	Cd74;Cd1d2;Fcgr3		H2-Eb1;H2-Aa;H2-Ab1
GO:0019886	antigen processing and presentation of exogenous peptide antigen via MHC class II	BP	14	0.15839	1	4.506e-05	1	Cd74		H2-Ab1;H2-Aa;H2-Eb1
GO:0022407	regulation of cell-cell adhesion	BP	66	0.000359892	1	0.327017	1	Lgals1;C1qtnf1;Cited2;Rgcc;Serpine2;Tgfb1		Jak2
GO:0030195	negative regulation of blood coagulation	BP	21	8.13175e-06	1	1	1	C1qtnf1;Serpine2;Thbs1;Anxa2;Anxa5
GO:0030198	extracellular matrix organization	BP	113	6.03346e-06	0.161515	0.176274	1	Tgfb1;Cyr61;Fbln5;Ctss;Rgcc;Agt;Ercc2;Lox;Lgals3;Anxa2	Adamts2	Smoc1;Lox
GO:0030334	regulation of cell migration	BP	350	2.50012e-07	0.123436	0.183004	1	Myo1c;Ccl11;Lgals3;Cdh13;Cd74;Rgcc;Vegfb;Agt;Cited2;Plvap;Srpx2;Rarres2;Cyr61;Tgfb1;Ret;Adam9;Thbs1;Ace;Anxa3;Cnn2	Sparc;Ret	Osbpl8;Apc;Pkp2;Jak2
GO:0030335	positive regulation of cell migration	BP	199	5.561e-08	0.0443571	0.365212	1	Ccl11;Srpx2;Vegfb;Cyr61;Ret;Plvap;Anxa3;Adam9;Lgals3;Rarres2;Cd74;Agt;Tgfb1;Thbs1;Cdh13;Myo1c	Ret;Sparc	Apc;Jak2
GO:0030595	leukocyte chemotaxis	BP	71	3.4534e-05	0.10371	1	1	Lgals3;Pf4;Thbs1;Vegfb;Fcgr3;Ccl11;Rarres2;Cd74	Spp1
GO:0031012	extracellular matrix	CC	194	1.24343e-09	0.0404617	0.0016531	1	Adamts5;Lox;Anxa2;Tgfb1;Lgals3;Prelp;Mfge8;Fbln5;Rarres2;Lgals1;Thbs1;Mmp12;Cfp;Thbs2;Loxl1;Crtac1;Serpine2;Cyr61	Adamts2;Sparc	Lox;Smoc1;Prelp;Sod3;Thbs2;Clu
GO:0031091	platelet alpha granule	CC	12	2.00135e-05	0.0113908	0.0515418	1	Serpine2;Thbs1;Thbs2;Pf4	Sparc	Thbs2
GO:0032103	positive regulation of response to external stimulus	BP	110	7.97944e-05	1	0.503255	1	Fcgr3;Tgfb1;Vegfb;Rarres2;Thbs1;Ace;Cdh13;Cd74;Ctss		Jak2
GO:0033130	acetylcholine receptor binding	MF	8	0.0910589	1	0.000783507	1	Ric3		Ubxn2a;Jak2
GO:0033210	leptin-mediated signaling pathway	BP	8	1	1	0.000646298	1			Lep;Prmt2
GO:0035414	negative regulation of catenin import into nucleus	BP	8	0.100658	1	0.000646298	1	Sfrp5		Sfrp5;Axin2
GO:0042167	heme catabolic process	BP	5	0.000512335	1	1	1	Blvra;Hmox1
GO:0042330	taxis	BP	223	8.11359e-07	0.339483	1	1	Cdh13;Pf4;Fcgr3;Ear2;Thbs1;Cyr61;Rarres2;Tgfb1;Slit3;Vegfb;Lgals3;Ptafr;Ccl6;Ccl11;Cd74	Spp1
GO:0042503	tyrosine phosphorylation of Stat3 protein	BP	16	1	1	9.79894e-05	1			Jak2;Prmt2;Lep
GO:0042509	regulation of tyrosine phosphorylation of STAT protein	BP	28	1	1	0.000660966	1			Prmt2;Lep;Jak2
GO:0042516	regulation of tyrosine phosphorylation of Stat3 protein	BP	16	1	1	9.79894e-05	1			Jak2;Lep;Prmt2
GO:0042611	MHC protein complex	CC	22	0.286086	1	0.000245865	1	Cd74		H2-Aa;H2-Ab1;H2-Eb1
GO:0042613	MHC class II protein complex	CC	10	0.11417	1	5.39602e-06	1	Cd74		H2-Ab1;H2-Eb1;H2-Aa
GO:0043062	extracellular structure organization	BP	113	6.03346e-06	0.161515	0.176274	1	Lox;Fbln5;Agt;Lgals3;Rgcc;Ctss;Tgfb1;Ercc2;Anxa2;Cyr61	Adamts2	Lox;Smoc1
GO:0043236	laminin binding	MF	23	2.55965e-07	1	1	1	Plekha2;Adam9;Ctss;Lgals1;Thbs1;Lgals3
GO:0043434	response to peptide hormone	BP	162	0.392142	1	0.000623116	1	Rarres2;Serpina3n;Serpina3c		Lep;Jak2;Serpina3n;Osbpl8;Slc9a1;Serpina3c
GO:0043542	endothelial cell migration	BP	92	0.000364443	0.140265	1	1	Thbs1;Tgfb1;Srpx2;Anxa3;Agt;Rgcc;Cdh13	Sparc
GO:0045766	positive regulation of angiogenesis	BP	69	6.08897e-05	1	1	1	Hmox1;Thbs1;Srpx2;Anxa3;Lrg1;Ccl11;Vegfb
GO:0046149	pigment catabolic process	BP	5	0.000512335	1	1	1	Hmox1;Blvra
GO:0048520	positive regulation of behavior	BP	63	0.000517523	0.100723	1	1	Vegfb;Cdh13;Rarres2;Cd74;Thbs1;Tgfb1	Pmch
GO:0048870	cell motility	BP	642	1.00413e-06	0.0245699	0.101696	1	Tgfb1;Adam9;Fcgr3;Cnn2;Myo1c;Mmp12;Anxa5;Dock8;Ret;Ccl6;Cited2;Rarres2;Srpx2;Cyr61;Lgals3;Pf4;Thbs1;Cd74;Vegfb;Agt;Rgcc;Plvap;Anxa3;Cdh13;Ccl11;Ace	Arhgap24;Ret;Spp1;Sparc	Apc;Jak2;Apcdd1;Pkp2;Sorbs2;Osbpl8;Lep
GO:0050819	negative regulation of coagulation	BP	23	1.28492e-05	1	1	1	Serpine2;Anxa5;Thbs1;C1qtnf1;Anxa2
GO:0050840	extracellular matrix binding	MF	40	7.76266e-07	0.00134955	0.211432	1	Ctss;Plekha2;Thbs1;Lgals3;Cyr61;Adam9;Lgals1	Spp1;Sparc	Smoc1
GO:0050865	regulation of cell activation	BP	200	0.000544727	0.275281	0.00936961	1	Tgfb1;Lgals3;Cd1d2;Thbs1;Lgals1;Cd74;Lmo4;C1qtnf1;Vnn1;Serpine2;Hmox1	Cd83	H2-Ab1;Icosl;Jak2;H2-Aa;Lep
GO:0050866	negative regulation of cell activation	BP	71	0.000822935	1	0.0754028	1	Lgals3;Tgfb1;Hmox1;Cd74;Serpine2;C1qtnf1		H2-Ab1;H2-Aa
GO:0050867	positive regulation of cell activation	BP	118	0.0126629	0.169874	0.000951381	1	Cd74;Vnn1;Tgfb1;Lgals1;Cd1d2;Thbs1	Cd83	H2-Ab1;Icosl;H2-Aa;Lep;Jak2
GO:0050900	leukocyte migration	BP	117	2.35079e-05	0.15871	0.519775	1	Fcgr3;Vegfb;Rarres2;Plvap;Dock8;Ccl11;Cd74;Pf4;Thbs1;Lgals3	Spp1	Lep
GO:0050921	positive regulation of chemotaxis	BP	55	0.000285204	1	1	1	Thbs1;Rarres2;Tgfb1;Cd74;Vegfb;Cdh13
GO:0051270	regulation of cellular component movement	BP	407	4.16969e-07	0.162123	0.259291	1	Cited2;Agt;Cyr61;Thbs1;Rgcc;Anxa5;Plvap;Cnn2;Srpx2;Anxa3;Cd74;Vegfb;Lgals3;Rarres2;Tgfb1;Ccl11;Myo1c;Ret;Cdh13;Ace;Adam9	Sparc;Ret	Osbpl8;Pkp2;Apc;Jak2
GO:0051272	positive regulation of cellular component movement	BP	208	9.48366e-08	0.0479256	0.389147	1	Plvap;Cyr61;Anxa3;Tgfb1;Ccl11;Myo1c;Thbs1;Agt;Vegfb;Ret;Adam9;Srpx2;Rarres2;Lgals3;Cd74;Cdh13	Sparc;Ret	Apc;Jak2
GO:0051428	peptide hormone receptor binding	MF	8	1	1	0.000783507	1			Lep;Jak2
GO:0051674	localization of cell	BP	642	1.00413e-06	0.0245699	0.101696	1	Pf4;Plvap;Cd74;Anxa5;Cited2;Cyr61;Thbs1;Ccl11;Rgcc;Dock8;Ccl6;Myo1c;Adam9;Rarres2;Ret;Tgfb1;Srpx2;Agt;Mmp12;Vegfb;Anxa3;Cnn2;Lgals3;Ace;Fcgr3;Cdh13	Ret;Arhgap24;Spp1;Sparc	Lep;Apcdd1;Jak2;Apc;Osbpl8;Sorbs2;Pkp2
GO:0051896	regulation of protein kinase B signaling	BP	80	0.000931613	1	0.0912358	1	C1qtnf1;Tgfb1;Sfrp5;Vegfb;Thbs1;Prkcdbp		Sfrp5;Osbpl8
GO:0060326	cell chemotaxis	BP	104	4.69342e-05	0.148825	1	1	Pf4;Ccl11;Cd74;Lgals3;Ccl6;Rarres2;Vegfb;Fcgr3;Thbs1	Spp1
GO:0070661	leukocyte proliferation	BP	122	0.0492236	1	0.000111707	1	Tgfb1;Npr3;Cd74;Dock8;Lgals3		Npr3;H2-Ab1;Clu;H2-Aa;Cd79a;Icosl
GO:0071621	granulocyte chemotaxis	BP	34	3.66251e-05	0.0500531	1	1	Fcgr3;Ccl11;Lgals3;Rarres2;Thbs1;Cd74	Spp1
GO:0071674	mononuclear cell migration	BP	12	0.00073225	1	1	1	Rarres2;Thbs1;Lgals3
GO:0071675	regulation of mononuclear cell migration	BP	10	0.000451211	1	1	1	Lgals3;Rarres2;Thbs1
GO:0071855	neuropeptide receptor binding	MF	13	1	0.000161414	1	1		Mrap2;Pmch
GO:0085029	extracellular matrix assembly	BP	9	0.000177359	1	0.0521535	1	Tgfb1;Lox;Fbln5		Lox
GO:0090100	positive regulation of transmembrane receptor protein serine/threonine kinase signaling pathway	BP	57	0.000893074	1	1	1	Cyr61;Tgfb1;Thbs1;Lrg1;Cited2
GO:0090130	tissue migration	BP	126	0.00040457	0.191783	1	1	Adam9;Agt;Tgfb1;Thbs1;Rgcc;Anxa3;Cdh13;Srpx2	Sparc
GO:0090132	epithelium migration	BP	125	0.000384814	0.19043	1	1	Cdh13;Adam9;Srpx2;Rgcc;Agt;Thbs1;Tgfb1;Anxa3	Sparc
GO:0090279	regulation of calcium ion import	BP	14	0.000580928	1	0.101626	1	Lgals3;Ace;Trpv2		Homer1
GO:0090287	regulation of cellular response to growth factor stimulus	BP	114	2.63244e-05	1	1	1	Myo1c;Thbs1;Vegfb;Agt;Lrg1;Tgfb1;Fgfrl1;Peg10;Cited2
GO:0097529	myeloid leukocyte migration	BP	55	7.19878e-05	0.0810756	1	1	Vegfb;Thbs1;Fcgr3;Cd74;Ccl11;Lgals3;Rarres2	Spp1
GO:0097530	granulocyte migration	BP	34	5.81893e-05	0.0500531	1	1	Fcgr3;Rarres2;Cd74;Thbs1;Ccl11;Lgals3	Spp1
GO:1900047	negative regulation of hemostasis	BP	21	8.13175e-06	1	1	1	C1qtnf1;Anxa2;Anxa5;Thbs1;Serpine2
GO:1901652	response to peptide	BP	170	0.423995	1	0.000807717	1	Serpina3c;Rarres2;Serpina3n		Jak2;Serpina3c;Osbpl8;Slc9a1;Serpina3n;Lep
GO:1990169	stress response to copper ion	BP	4	0.000512335	1	1	1	Mt2;Mt1
GO:2000145	regulation of cell motility	BP	366	1.0785e-07	0.132867	0.20618	1	Agt;Ace;Adam9;Myo1c;Ret;Plvap;Cdh13;Cyr61;Srpx2;Anxa3;Lgals3;Ccl11;Thbs1;Rarres2;Cnn2;Anxa5;Vegfb;Cited2;Tgfb1;Cd74;Rgcc	Ret;Sparc	Apc;Jak2;Osbpl8;Pkp2
GO:2000147	positive regulation of cell motility	BP	202	6.66269e-08	0.0455349	0.37243	1	Plvap;Adam9;Cd74;Tgfb1;Thbs1;Agt;Vegfb;Cyr61;Ret;Ccl11;Myo1c;Anxa3;Cdh13;Rarres2;Lgals3;Srpx2	Sparc;Ret	Apc;Jak2
