# Supplementary material for: Common and unique transcriptional responses to dietary restriction and loss of insulin receptor substrate 1 (IRS1) in mice
Source: Aging (Albany NY). 2018 May 20;10(5):1027–52. doi: 10.18632/aging.101446 (PMC5990393; doi:10.18632/aging.101446)
Supplement: Supplementary Table S4 [file aging-10-101446-s005.xlsx]

## Sheet: DR_VENN
gene	locus	WT_DR vs WT_AL_BR Brain	WT_DR vs WT_AL_LI Liver	WT_DR vs WT_AL_SM Muscle	WT_DR vs WT_AL_WA White Adipose
Lrrc17	5:21483846-21645605	up	not expressed	-	-
Gas5,Gm22357,Gm22489,Gm23212,Gm23436,Gm24489,Gm25789,Gm26224,Mir5117,Snord47	1:160978584-161038539	up	-	-	-
Rny1	6:47788068-47788180	-	-	-	not expressed
mt-Nd2	MT:3913-5016	up	-	-	-
Gm13731	2:87333801-87333997	-	-	-	-
Gm13339	2:22227502-22618252	-	-	-	-
Gm29257	1:132959483-133030561	-	-	-	-
Rny3	6:47781623-47781725	-	not expressed	-	-
Hba-a2	11:32296488-32297298	-	-	-	-
Acta1	8:119910359-124345724	-	not expressed	-	-
D7Ertd715e,Gm22285	7:59619157-59904686	-	not expressed	not expressed	not expressed
Hba-a1	11:32283510-32284465	-	-	-	-
Gm26917	17:39843012-39846341	-	down	-	-
mt-Tl2,mt-Ts2	MT:11612-11741	-	-	-	-
mt-Rnr2	MT:1093-2675	-	-	-	up
Gm10247	16:8922056-8922389	-	-	-	-
Rnu3b3	11:87405064-87555823	-	-	-	-
mt-Rnr1	MT:69-1024	up	-	-	up
Gm11694	11:115493023-115493182	-	-	-	-
Gm13341	2:22227502-22618252	-	-	-	-
RP23-397E23.1	1:8361474-9299878	-	-	-	-
Rps27rt	9:114978568-115232225	-	-	-	-
Alas2	X:150519518-150643878	-	-	-	-
mt-Tf	MT:0-68	-	-	not expressed	not expressed
mt-Nd5	MT:11741-14070	-	-	-	-
Gm6654	6:146602351-146650602	-	-	-	-
Snora30	7:127510437-127573116	not expressed	not expressed	-	not expressed
mt-Ty	MT:5259-5326	-	not expressed	not expressed	not expressed
Rpl37	15:5116612-5119140	-	-	-	-
Gm16276	17:56005710-56036637	-	-	-	-
Nupl1	14:60219203-60251507	-	up	-	-
Gm10540	18:45268859-45896509	-	-	-	-
mt-Tq	MT:2750-3842	-	-	-	not expressed
Gpr25	1:136259406-136346104	-	not expressed	not expressed	not expressed
mt-Nd4,mt-Nd4l	MT:9876-11544	-	-	-	-
Gm27875,Jpx	X:103493557-103506425	-	-	-	-
mt-Tm	MT:3844-3913	up	-	-	-
Prss12	3:123446912-123506602	up	not expressed	not expressed	-
Ephx4	5:107402735-107435039	-	not expressed	not expressed	not expressed
mt-Nd3	MT:9458-9806	up	-	-	-
Gm24570	7:59572706-59572785	not expressed	not expressed	not expressed	not expressed
Dkkl1	7:45207524-45211883	up	not expressed	not expressed	not expressed
Gm10925	1:24613973-24614651	up	-	-	-
Gm28438	1:24612774-24613119	up	-	-	-
RP23-279D12.2	3:93064739-93064964	-	-	not expressed	-
Gm12009	11:15049157-15050257	-	-	-	-
Gm4482	6:122727808-122801640	-	-	-	-
Rpl37a	1:72711259-72713809	up	-	-	-
mt-Nd1	MT:2750-3842	-	-	-	-
Gm4076	13:85126998-85127514	-	-	-	-
Rnu3b4	11:87405064-87555823	-	-	-	-
Isg20	7:78913423-78920362	-	-	-	-
Rpl10	X:74270811-74273135	-	-	-	-
Gm11407	4:80002330-80003388	up	-	-	-
Gm24658	7:59619157-59904686	not expressed	not expressed	not expressed	not expressed
mt-Tr	MT:9807-9875	-	-	-	-
Gm11945	11:3452364-3479831	-	-	-	-
Gm10689	8:25454272-25454704	-	-	-	-
Mir6236	9:110281286-110281409	-	-	-	-
mt-Atp6,mt-Atp8,mt-Co3	MT:7765-9390	-	-	-	-
Rps26-ps1	8:107436397-107558594	-	-	up	-
Gm10222,Gm28439	1:24611534-24612700	up	-	-	-
Igfbp6	15:102144361-102149511	-	-	-	-
Kirrel2	7:30447533-30457690	-	not expressed	not expressed	not expressed
Gm14822	X:104746481-104746772	-	-	-	-
Cisd3	11:97685825-97688621	-	-	-	-
Rps12-ps16	X:125986965-125987364	-	-	-	-
Gm15464	1:60069784-60153953	-	-	-	-
Gm23444	11:83271497-83271688	not expressed	-	not expressed	-
Fezf2	14:12341891-12345865	up	not expressed	not expressed	not expressed
Nr4a1	15:101266845-101274792	up	-	-	-
Ntn5	7:45677688-45694556	-	not expressed	not expressed	not expressed
Gm3150	15:72589620-73061204	-	-	-	-
Yjefn3	8:69887787-69903518	-	-	-	-
Ly6g6e	17:35071442-35078804	-	not expressed	not expressed	not expressed
Rps29	12:69157721-69159186	-	-	up	-
Junb	8:84976908-84978748	-	-	-	-
Gm7079	X:8042942-8074760	-	-	-	-
Rpph1	14:50807448-50807767	not expressed	-	not expressed	not expressed
Gm28437	1:24613188-24613971	-	-	-	-
Gm26315	2:6539693-7509563	-	-	-	-
Tbr1	2:61802929-61814114	up	not expressed	not expressed	not expressed
A830036E02Rik	11:99415665-99425497	-	not expressed	not expressed	not expressed
Acvr1c	2:58267452-58357895	-	not expressed	not expressed	-
Rpl31-ps13	13:100407769-100446406	-	-	up	-
mt-Co2	MT:7012-7696	up	-	-	-
Cox20	1:178319129-178337797	-	-	-	-
Npas4	19:4984354-4989971	up	not expressed	not expressed	not expressed
Snord82	1:86344718-86359400	not expressed	-	-	-
1700086L19Rik	12:74284280-74295945	-	not expressed	not expressed	not expressed
Rps21	2:180257376-180258445	-	-	-	-
Gm25452	7:59591421-59591500	-	not expressed	not expressed	not expressed
mt-Tk	MT:7699-7764	-	not expressed	-	not expressed
Rps19-ps7	2:140073031-140073469	-	-	-	-
Gm20302	1:105382259-105663677	-	-	-	-
Gm28661	1:24614884-24615565	up	-	-	-
Gm10343	16:10801368-10801716	-	-	-	-
mt-Tv	MT:1024-1093	-	-	-	not expressed
Rps12-ps14	X:125857682-125858081	-	-	-	-
Rtn4rl2	2:84871923-84886710	-	not expressed	not expressed	-
R3hdm2	10:127380326-127499384	-	-	-	-
Cdhr1	14:37077849-37098311	-	not expressed	not expressed	not expressed
Rps27	3:90212724-90213615	-	-	-	-
Naca	10:128035345-128048637	-	-	-	-
Gm24601	6:94826780-94826923	-	down	not expressed	-
Sult2b1	7:45729982-45759612	-	not expressed	not expressed	not expressed
Brsk1	7:4690603-4725249	-	not expressed	not expressed	not expressed
Gm9703	17:27530066-27530409	-	-	-	-
Psme2	14:55587440-55591113	-	-	-	-
Dgkh	14:78569608-78725089	-	not expressed	not expressed	not expressed
1810022K09Rik	3:14578640-14611285	-	-	-	-
Cox7a2	9:79755240-79759853	-	up	up	-
Rpl31-ps12	16:16753015-16829456	-	-	up	-
Fam229b	10:39118803-39133914	-	not expressed	-	-
Gm25541	2:27539804-27539930	not expressed	-	not expressed	not expressed
2900055J20Rik	18:40256961-40257684	-	not expressed	not expressed	not expressed
Gm10012	17:25794570-25985680	-	-	-	-
mt-Ta	MT:5017-5086	-	-	-	-
Gm14633	X:56447887-56448366	-	up	-	-
Rps18-ps1	4:71370737-71371196	-	-	-	-
mt-Cytb	MT:14144-15288	up	-	-	-
Mrps18c	5:100798626-100804471	-	-	-	-
Gm14303	2:172509520-172509691	-	-	-	-
mt-Tn	MT:5088-5159	-	-	-	not expressed
Gm14044	2:130384882-130385329	-	up	-	-
Gm14173	2:156410896-156411174	-	-	-	-
Rpl30-ps8	12:99047229-99047577	-	-	-	-
Vip	10:5639217-5647614	up	not expressed	not expressed	not expressed
Gm23560	7:59617611-59617690	-	not expressed	not expressed	not expressed
Gm10712	7:13324654-13360672	-	-	-	-
Hbb-bt	7:103812523-103813996	-	-	-	-
Ntan1	16:13819231-13903131	-	-	-	-
Ndufb4	16:37647169-37654453	-	-	-	-
Satb2	1:56793980-57050084	-	not expressed	not expressed	not expressed
RP24-574O8.7	3:92262270-92263474	-	-	-	-
P2ry12	3:59006977-59351167	-	not expressed	not expressed	not expressed
Gm15899	8:119910359-124345724	-	-	-	-
mt-Te	MT:14070-14139	-	-	-	not expressed
Aaas	15:102338246-102350759	-	-	-	-
Klf5	14:99298690-99313405	-	not expressed	-	not expressed
Rps26	10:128624529-128626506	-	-	-	-
Cd52	4:134065911-134095082	-	-	-	-
Vipr1	9:121642715-121672954	up	-	not expressed	not expressed
Pygl	12:70190810-70234165	-	-	-	-
Rpl21-ps12	6:90844977-90845460	-	-	-	-
1810055G02Rik	19:3708332-3717881	-	-	-	-
Gm12079	11:27883111-27883355	-	not expressed	not expressed	-
Gm6404	13:116153780-116154134	-	-	-	-
Pigx	16:32084417-32099738	-	-	-	-
Rpl30-ps11	X:12456885-12457230	-	-	-	-
mt-Th	MT:11545-11612	-	-	-	not expressed
Mrpl42	10:95480805-95501927	-	-	up	-
Gm15027	X:13179442-13179580	-	-	-	-
Lrp1b	2:40595247-42653598	-	not expressed	not expressed	not expressed
mt-Tp	MT:15355-15422	-	not expressed	-	-
Rnu3b2	11:87405064-87555823	-	-	-	-
Gm24447	15:93234362-93234700	-	-	-	-
Ift74	4:94614490-94693229	-	not expressed	-	-
Gm27404,Gm27645,Gm27761,Zeb2os	2:44983633-45117395	-	not expressed	-	-
AW822252	X:53695854-53716772	-	not expressed	not expressed	not expressed
Gm10591	4:42612194-42612860	-	not expressed	-	not expressed
Gm12482	4:52814603-52828269	-	-	-	-
Gm12335	11:74898070-75164448	-	-	-	-
Mtx2	2:74825802-74878431	-	-	-	-
Gm5619	9:85781867-85782627	-	-	-	-
Gm9001	6:75782357-75782756	-	-	-	-
mt-Tc	MT:5191-5257	-	-	-	not expressed
Ppp1r2-ps1	17:6310546-6493180	-	-	-	-
8430408G22Rik	6:116633007-116673836	-	-	-	-
Nr1d1	11:98740637-98775333	-	-	-	-
Gm11575	1:60482291-60567104	-	-	-	-
Serpina11,Serpina9	12:103980242-104013755	-	-	not expressed	not expressed
C1qtnf4	2:90885859-90890525	-	not expressed	-	-
Ndufaf6	4:11051044-11076205	-	-	-	-
Wdfy2	14:62836907-62956886	-	-	-	-
Lmcd1	6:112273757-112330425	-	not expressed	-	-
Gpr88	3:116249653-116253484	up	not expressed	not expressed	not expressed
Hhatl	9:121784015-121792507	-	not expressed	-	not expressed
Zfp341	2:154612936-154646821	-	not expressed	-	-
Rpl37rt	5:115102922-115110268	-	-	-	-
Hbb-bs	7:103826533-103828096	-	-	-	-
Stard8	X:99003247-99074728	-	-	-	-
Plcd3	11:102838472-103101658	-	not expressed	-	-
2810455O05Rik	8:119910359-124345724	-	not expressed	not expressed	not expressed
Lca5	9:83390292-83454573	-	not expressed	not expressed	not expressed
B4galt2,Ccdc24	4:117834505-117883487	-	not expressed	-	-
Gm26374	7:59587675-59587754	not expressed	not expressed	not expressed	not expressed
Camk4	18:32915825-33195767	up	not expressed	not expressed	not expressed
Gm715	X:60223289-60807993	-	not expressed	not expressed	-
Gm15616	5:71699931-72138389	-	-	-	-
Ssbp4	8:70597490-70608314	-	not expressed	not expressed	-
Rps28	17:33810519-33824562	-	-	-	-
Mef2c	13:83504033-83667079	up	not expressed	-	-
Vstm2l	2:157914652-157944719	-	not expressed	not expressed	not expressed
mt-Tg	MT:9390-9458	-	not expressed	-	not expressed
Tmem218	9:37208332-37223210	-	-	-	-
Arhgap33	7:30522225-30534180	up	not expressed	not expressed	not expressed
Gpr6	10:41069988-41072285	up	not expressed	not expressed	not expressed
Ptprv	1:135108496-135132594	-	not expressed	not expressed	-
Gas7	11:67455436-67771153	-	not expressed	-	-
Tmem240	4:155734799-155740564	-	not expressed	not expressed	not expressed
Kcnh3	15:99224975-99242817	-	not expressed	not expressed	not expressed
Shisa8	15:82206951-82212815	-	not expressed	not expressed	not expressed
Erlin1	19:44034943-44069785	-	-	-	-
Wnt6	1:74771891-74785322	not expressed	not expressed	not expressed	not expressed
Gm5621	9:105560117-105560762	-	up	up	-
Ccl21b	4:42255766-42256432	-	not expressed	-	not expressed
Supt3	17:44495986-45119290	-	-	-	-
RP23-36C9.2	3:92215798-92256724	-	-	-	-
Wnt10a	1:74791515-74804179	-	not expressed	not expressed	not expressed
Ufc1	1:171288562-171295024	-	-	-	-
Snora7a	6:115805504-115808747	-	not expressed	not expressed	-
Gm19345	7:19852002-19861299	not expressed	not expressed	not expressed	not expressed
Pabpc1	15:36595660-36608973	-	-	-	-
Fut9	4:25609331-25800244	-	not expressed	not expressed	not expressed
Gm29216	1:24615705-24616197	-	-	-	-
Magoh	4:107879754-107887424	-	-	-	-
Mrc2	11:105292642-105351139	-	not expressed	down	down
Nsa2	13:97067286-97137926	-	-	-	-
Gm14109	2:147402953-147403262	-	-	-	-
Tesk1	4:43441938-43454628	-	-	-	-
Trhr2	8:119910359-124345724	-	not expressed	not expressed	not expressed
Gm5121	9:57334127-57334754	-	-	up	-
Gm6181	7:52755464-52755728	-	-	-	-
Dym	18:75018771-75286966	-	-	-	-
Egr4	6:85511130-85513589	-	not expressed	not expressed	not expressed
Gm20594	6:79818030-79818364	-	-	-	-
1810032O08Rik	11:116671659-116694868	-	-	-	-
Abracl	10:18011262-18023252	-	-	-	-
Kcnh7	2:62664284-63184287	-	not expressed	not expressed	not expressed
Gatc	5:115333241-115341178	-	-	-	-
Polr2f	15:79141350-79151774	-	-	-	-
Slc2a10	2:165503786-165519917	-	not expressed	not expressed	not expressed
Chrm1	19:8663788-8683587	-	not expressed	not expressed	not expressed
Jsrp1	10:80808495-80813498	-	not expressed	up	not expressed
Nkpd1	7:19518730-19525050	-	not expressed	not expressed	not expressed
Gm6133	18:78349753-78350701	-	-	-	-
Glrx2	1:143716337-143749676	-	-	-	-
Hs3st2	7:121392295-121501768	-	not expressed	not expressed	not expressed
Gm13192	2:4959544-4959752	-	up	-	-
Rell2	18:37955078-37969774	-	not expressed	not expressed	not expressed
Dlx2	2:71543407-71546754	-	not expressed	not expressed	not expressed
Dancr	5:74093059-74095405	-	-	-	not expressed
Gm12372	4:37139106-37139874	-	-	-	-
Gm14769	X:82948869-85206141	-	-	-	-
Col6a1	10:76708791-76726168	-	-	-	-
Kcnh4	11:100740375-100759942	-	not expressed	not expressed	not expressed
Stoml2	4:43027689-43053253	-	-	-	-
RP23-201I6.3	1:180721613-180722091	-	-	-	-
Mfge8	7:79133768-79149060	-	-	down	-
Mrps36-ps1	17:53866714-53867020	-	-	-	-
Foxp4	17:47867132-47924645	-	-	-	-
Gm18284	15:81663888-81697287	-	-	-	-
Tmem192	8:64947184-64969034	-	-	-	-
Emx2	19:59425103-59465357	-	not expressed	not expressed	-
Rpl28	7:4792873-4794562	-	-	-	-
Sec61g	11:16500529-16508484	-	-	-	-
Lingo1	9:56618474-56685253	-	not expressed	not expressed	not expressed
RP23-206J9.6	13:67612760-67614556	-	not expressed	not expressed	not expressed
Twistnb	12:33429623-33439380	-	-	-	-
Gm6570	3:87617558-87824306	-	-	-	-
Slirp	12:87425839-87472299	-	-	-	-
Egr1	18:34859822-34864984	up	-	-	-
Cpne5	17:29156549-29237797	-	not expressed	not expressed	not expressed
BC061194,Gm13334	2:18694031-18760862	-	not expressed	not expressed	not expressed
Gm8692	X:75987177-75987615	-	up	-	-
Nfkbil1	17:35220174-35238767	-	-	-	-
Trhde	10:114398822-114816831	-	not expressed	not expressed	-
Ppp1r2-ps4	9:66805305-66805938	up	-	-	-
Hist1h2ap	13:21833025-21833507	-	-	not expressed	-
Gm7857	X:134681519-134681877	-	-	-	-
1700101I11Rik	6:129532093-129542331	-	not expressed	not expressed	not expressed
Gm13623	2:69758032-69789575	-	-	-	-
Lgals9	11:78962973-78984946	-	-	-	-
Gm13612	2:68831016-68831406	-	-	-	-
Pdk3	X:93764606-93832201	-	not expressed	not expressed	-
Pan3	5:147430160-147548502	-	-	-	-
Fam171a2	11:102430314-102447682	-	not expressed	not expressed	-
Snord49a	11:62602876-62604807	-	-	-	-
Dlx6	6:6820188-6869531	-	not expressed	not expressed	not expressed
Runx1t1	4:13743435-13893649	-	not expressed	not expressed	not expressed
Sobp	10:43002499-43174530	-	not expressed	-	not expressed
Syn1	X:20797813-20921004	-	not expressed	not expressed	not expressed
Arpc2	1:74236083-74268209	-	-	-	-
Mrps36	13:100735954-100744659	-	-	-	-
Grin2b	6:135713231-136175664	-	not expressed	not expressed	not expressed
Cckbr	7:105425816-105470898	-	not expressed	not expressed	not expressed
A330076H08Rik,Mir344g	7:61930912-61982359	not expressed	not expressed	not expressed	not expressed
Gm13268	2:14603087-14987908	-	-	-	-
Spag5	11:78301528-78322457	-	not expressed	-	not expressed
Homer1	13:93303756-93404129	up	-	-	-
Nop56	2:130274429-130284547	-	up	-	-
Gm13305	4:42158841-42168603	-	-	-	-
Slc18a3	14:32408202-32483539	-	not expressed	not expressed	not expressed
Pantr1	1:42590781-42694842	-	not expressed	not expressed	not expressed
Ftx	X:103560906-103623755	-	-	not expressed	not expressed
Rpl30-ps1	6:38376806-38377154	-	-	-	-
Ldb2	5:44472132-44799707	-	-	-	-
Ppfia3	7:45339125-45370583	-	not expressed	not expressed	-
Tnnt2	1:135836353-135852260	-	not expressed	not expressed	not expressed
Gimap1,Gimap5,Gimap7,Gm28053	6:48718606-48754210	-	-	-	-
mt-Co1	MT:5327-6938	-	-	-	-
Gm1976	17:94750099-94834799	-	not expressed	-	-
Lrif1	3:106684986-106736577	-	-	-	-
mt-Nd6	MT:11741-14070	-	-	-	-
Rtn4r	16:18127641-18152408	-	not expressed	not expressed	not expressed
Lsp1	7:142460808-142516009	-	-	-	-
Pqlc2	4:139294028-139310708	-	-	-	-
Shf	2:122348891-122369162	-	-	-	-
Mrpl18	17:12911348-12940402	-	-	-	-
Nwd2	5:63649102-63810546	-	not expressed	not expressed	not expressed
Gm16323	2:30392253-30415813	-	not expressed	not expressed	not expressed
Ppan	9:20888174-20892178	up	-	-	-
Tpt1-ps6	X:101768534-101769057	-	-	-	-
RP23-330G24.3	X:152294827-152296304	-	not expressed	not expressed	not expressed
Rcor2	19:7267324-7275225	-	not expressed	not expressed	-
Gm22111	7:59445702-59453239	not expressed	not expressed	not expressed	not expressed
Git1	11:77493561-77507786	-	-	-	-
Pdlim2	14:70164217-70177681	-	-	-	-
Palm	10:79793571-79820896	-	-	-	-
Atp6ap1l	13:90883432-90905355	-	not expressed	not expressed	not expressed
Reln	5:21884453-22344702	-	-	-	not expressed
Cct7	6:85446809-85468477	-	-	-	-
Dpy30	17:74299473-74323944	-	-	-	-
Dedd2	7:25202839-25219859	-	-	-	-
1110054M08Rik	16:24391611-24992576	-	-	-	-
Pik3r2	8:70768175-70776713	-	-	-	-
Rnu3b1	11:87405064-87555823	-	-	-	-
Ap4m1	5:138161070-138187451	-	-	-	-
Gm13352	2:18649084-18649346	-	-	-	-
Alox5	6:116410076-116461178	not expressed	not expressed	not expressed	-
Atxn7l2	3:108202221-108210934	-	-	-	-
Emid1	11:5106264-5152257	-	not expressed	-	not expressed
Gm24759	7:59597034-59597113	not expressed	not expressed	not expressed	not expressed
Zmiz2	11:6389073-6406158	-	-	-	-
Rpl38	11:114668523-114672331	-	-	-	-
Hic1	11:75164564-75169519	-	-	-	-
Gm10125,Gm26575	18:5491502-5775467	-	not expressed	not expressed	not expressed
Igsf21	4:140026845-140246784	-	not expressed	not expressed	-
Ano3	2:110655200-110950923	up	not expressed	not expressed	not expressed
Lor	3:92080270-92083142	-	not expressed	not expressed	not expressed
Cecr6	6:120488938-120493807	up	not expressed	not expressed	not expressed
Ctgf	10:24549440-24598683	-	-	-	-
Pgr	9:8899832-8968611	-	not expressed	not expressed	not expressed
Rpl35a-ps5	5:33076037-33076370	-	-	-	-
Rn7sk	9:78175302-78175633	-	-	-	-
Gm27403	3:34560339-34560553	-	not expressed	not expressed	not expressed
Rcn3	7:45082912-45092221	-	-	-	-
Lrrc7	3:158084438-158562221	-	not expressed	not expressed	not expressed
Rpl30-ps3	2:90745369-90781021	-	-	-	-
Chchd10	10:75935572-75940672	up	-	-	up
Gm8508	5:109757521-109757931	-	-	-	-
Tmem246	4:49584505-49597876	-	not expressed	-	-
Ighg2c	12:113285324-113288932	-	-	-	-
Mrpl52	14:54426908-54429750	-	-	-	-
Cerkl,Neurod1	2:79255425-79461107	-	-	not expressed	not expressed
Park2	17:10840383-12063361	-	-	-	-
Ipcef1	10:6740628-7052478	-	not expressed	not expressed	not expressed
Rps8	4:117153826-117156243	-	-	-	-
Tmem234	4:129600667-129624059	-	-	-	-
Cdkl5	X:160768012-160994702	up	not expressed	not expressed	not expressed
Hhipl1	12:108306269-108328300	-	not expressed	not expressed	not expressed
Cyb5r4	9:87022013-87077774	-	-	-	-
Gm8880	X:88959216-88959670	-	-	-	-
n-R5-8s1	18:73533402-73533550	-	down	-	up
Sema3a	5:13396783-13602565	-	not expressed	not expressed	not expressed
Snhg12,Snora44,Snora61,Snord99	4:132308677-132311024	-	-	-	up
Plxnd1	6:115954810-115995005	-	-	-	-
Ccl27b	4:42655250-42656005	-	-	not expressed	not expressed
Kcnk12	17:87745836-87797994	-	not expressed	not expressed	not expressed
Rpl39	X:37082519-37085402	-	-	-	-
Rps11-ps3	4:10946607-10947093	-	-	-	-
Reep6	10:80329952-80336441	-	-	up	-
Vars	17:35000986-35016322	-	-	-	-
Arc	15:74669082-74672570	-	not expressed	not expressed	not expressed
Brix1	15:10474778-10485947	-	-	-	-
Hdgfrp2	17:56079656-56109803	-	-	-	-
Adrb1	19:56722371-56724862	-	not expressed	not expressed	-
Ikzf4	10:128630842-128649811	-	not expressed	not expressed	not expressed
Bola3	6:83349146-83360136	-	-	-	-
Gm5239	18:35536582-35536951	-	-	-	-
Dram2	3:106481981-106575890	-	-	-	-
Lrrc73	17:46254164-46257316	-	not expressed	not expressed	not expressed
Brms1	19:5041403-5049917	-	-	-	-
2410006H16Rik	11:62602876-62604807	-	-	-	-
Dlx1	2:71453275-71537891	-	not expressed	not expressed	not expressed
Wdr66	5:123252101-123327484	-	not expressed	not expressed	-
Rps18	17:33951998-33966984	-	up	-	-
Gm10051	5:133475122-133475536	-	-	up	-
Aimp2	5:143817787-143909847	-	-	-	-
Cttnbp2	6:18366477-18514869	-	not expressed	not expressed	not expressed
Il2	3:37063526-37125959	-	-	-	-
Gm14200	2:158409847-158499253	-	-	-	-
Ubqln4	3:88553757-88569725	-	-	-	-
Fam96b	8:104639838-104658587	-	-	-	-
Rps7	12:28630846-28635953	-	-	-	-
Rps23	13:90923130-90924942	-	up	-	-
Rpl23a	11:78176710-78183584	-	-	-	-
Supt5	7:28314897-28338719	-	-	-	-
Gm5611	9:17030044-17030899	-	-	-	-
Lmo4	3:144188529-144205220	-	-	-	-
Akip1	7:109703689-109723850	-	-	-	-
Nrxn3	12:88722875-90334935	-	not expressed	not expressed	not expressed
Raph1	1:60482291-60567104	-	-	-	-
Camk2n2	16:20611592-20646485	-	-	not expressed	-
Zfp628	7:4915216-4922003	-	-	-	-
Ier5l	2:30471536-30474219	-	not expressed	not expressed	-
Synpo	18:60593972-60660142	-	-	-	-
Inhba	13:16011850-16027211	-	-	not expressed	not expressed
Cetn4	3:37307748-37579096	-	not expressed	not expressed	-
Actn1	12:80167541-80260371	up	-	-	-
Drd2	9:49340661-49407214	-	not expressed	not expressed	not expressed
Rpl31-ps14	1:66948562-66948940	-	up	up	-
Rbp4	19:38116619-38125321	-	-	up	-
Map7d1	4:126232166-126256343	-	-	-	-
Panx1	9:15005160-15045478	-	not expressed	-	-
Man2b1	8:85083268-85098739	-	-	-	-
Mcm7	5:138161070-138187451	-	-	-	-
Psmb1	17:15475720-15498276	-	-	-	-
Ssbp2	13:91460282-91786148	-	not expressed	-	-
Cplx3	9:57600018-57606281	-	not expressed	not expressed	not expressed
Gm13680	2:83353156-83353949	-	-	-	-
Mzf1	7:13042302-13054764	-	not expressed	not expressed	not expressed
Adcy2	13:68620042-68999541	-	not expressed	-	not expressed
Endog	2:30171492-30178459	-	-	-	-
Zfp1	8:111643442-111671008	-	-	-	-
Aasdh	5:76873658-76905514	-	-	-	-
Diras1	10:81019588-81026567	-	not expressed	not expressed	not expressed
Gm13864	6:34780431-34859459	-	-	-	-
1700003E16Rik	6:83156403-83162975	-	not expressed	not expressed	not expressed
Ecd	14:20319858-20348121	-	-	-	-
Eif3e	15:43250039-43282736	-	-	-	-
Psmc5	11:106256153-106263120	-	-	-	-
Parl	16:20279819-20302387	-	-	-	-
Ptpla	2:13850281-14056135	-	-	-	-
Fam163b	2:27110379-27142491	-	not expressed	not expressed	not expressed
Celf5	10:81459226-81482709	up	not expressed	not expressed	not expressed
Neurod6	6:55677817-55681263	-	not expressed	not expressed	not expressed
Trip6	5:137309898-137314241	-	-	-	-
Ccdc80	16:45093401-45127924	-	-	down	-
6330418K02Rik	5:138259655-138280005	-	-	not expressed	-
Vprbp	9:106821873-107231909	-	-	-	-
Rpl30	15:34440504-34443640	-	-	-	-
Arhgef15	11:68943154-68957480	-	-	-	-
Katna1	10:7725999-7763150	-	-	-	-
Tmem203	2:25244820-25256292	-	-	-	-
Lcorl	5:45669921-45857615	-	-	not expressed	-
Exoc7	11:116288000-116309510	-	-	-	-
Sdhb	4:140961202-140979193	-	up	-	-
Pou2f2	7:25087343-25159922	-	not expressed	not expressed	not expressed
Arpp19	9:75037613-75060313	-	-	-	-
Gm11401	11:6242377-6242721	-	-	-	-
Mmp16	4:17852892-18119145	-	not expressed	not expressed	not expressed
Atp1a3	7:24978166-25005957	-	not expressed	not expressed	up
Zfp65	13:67705305-67729119	-	-	-	-
Wnt9a	11:59306927-59333552	-	not expressed	-	-
Pthlh	6:147252100-147264167	-	not expressed	not expressed	not expressed
Pyroxd1	6:142345653-142387087	-	-	-	-
Sirt2	7:28756173-28788665	-	-	-	-
Tbc1d7	13:43151743-43171501	-	-	-	-
Zfp758	17:22361452-22377281	-	-	-	-
Rbfox3	11:118489761-118911597	-	not expressed	not expressed	not expressed
Lars2	9:123366939-123462664	-	-	-	-
Gm3809	1:186960507-186961513	-	-	-	-
Rps12-ps11	X:124469958-124470357	-	-	-	-
Drap1	19:5406739-5424979	up	-	-	-
Hebp1	6:135137518-135168215	-	-	-	-
Tmem158	9:123259057-123260789	-	not expressed	-	-
Klhl40	9:121777606-121783819	-	not expressed	-	not expressed
Fabp5l2	18:7347961-7626863	-	not expressed	not expressed	-
Elmod1	9:53911459-53975301	up	not expressed	not expressed	not expressed
3110035E14Rik	1:9547947-9631175	-	not expressed	not expressed	not expressed
Loxl3	6:83034172-83057680	-	not expressed	not expressed	-
Sipa1l1	12:82170015-82451782	-	-	-	-
Gabrd	4:155384979-155398112	-	not expressed	not expressed	not expressed
Gm15378	X:75143423-75143630	-	not expressed	-	not expressed
Ttc9b	7:27653914-27656208	-	not expressed	not expressed	not expressed
Kctd14	7:97451333-97459553	-	not expressed	not expressed	not expressed
Actn4	7:28881655-28962340	-	-	-	-
Pde10a	17:8525371-8986648	-	not expressed	not expressed	not expressed
Zfp942	17:21926959-21962464	-	-	down	-
Gm6872	7:41666516-41727193	-	-	-	-
Ano1	7:144588548-144751974	not expressed	not expressed	-	-
Dhps	8:85071756-85082339	-	-	-	-
Nrgn	9:37544491-37552904	-	not expressed	not expressed	-
Timm13	10:80899449-80900969	-	-	-	-
Dlgap3	4:127169203-127237022	-	not expressed	not expressed	not expressed
Hspg2	4:137468768-137570630	-	-	-	-
Ctxn1	8:4257647-4259274	-	not expressed	not expressed	-
Syne1	10:5020202-5069063	up	-	-	-
Tmem126a	7:90450699-90457229	-	-	-	-
Rps12-ps18	X:124855728-124856127	-	-	-	-
Gm17258	2:176257248-176258516	-	not expressed	not expressed	not expressed
RP24-374C7.1	12:113381010-113381561	-	-	-	-
Tma7-ps	1:171711087-171711282	-	-	-	-
Snf8	11:96034884-96047430	-	-	-	-
Ndufa3	7:3617372-3620163	-	-	up	-
Kcnb1	2:167103377-167240604	-	not expressed	-	-
E2f3	13:29906574-29985668	-	-	-	-
9130221H12Rik	7:25228257-25237851	-	-	-	-
Gm10443	6:86334030-86334240	-	-	up	-
Il34	8:110741828-110807477	-	-	-	-
Zfp386	12:116047723-116063360	-	-	-	-
Cars	7:143557229-143600090	-	-	-	-
Gm10419	5:108369857-108378239	-	not expressed	not expressed	not expressed
Shisa7	7:4825551-4844696	-	not expressed	not expressed	not expressed
Gm17081	4:42239724-42240202	-	not expressed	not expressed	not expressed
Cacnb4	2:52425011-52676831	-	not expressed	not expressed	not expressed
Cd248	19:5068077-5070637	-	not expressed	-	-
Gm11549	3:36515056-36521813	-	not expressed	not expressed	not expressed
Pigp	16:94358762-94469222	-	-	-	-
Kalrn	16:33974257-34573532	-	-	-	not expressed
Gm3852	1:46011756-46012020	-	-	-	-
Shank1	7:44310252-44358351	-	not expressed	not expressed	not expressed
Asl	5:130011257-130025132	-	-	-	-
Trpt1	19:6996130-7019469	-	-	-	-
Usf2	7:30945251-30973464	-	-	-	-
Amn	12:111271110-111276426	-	not expressed	not expressed	not expressed
Rpl31-ps16	17:85498632-85499008	-	-	-	-
Gm9836	5:24256821-24257037	-	-	-	-
Cwc15	9:14500616-14510577	-	up	-	-
Setd6	8:95715914-95719010	-	-	-	-
Lrfn3	7:30355513-30362772	-	-	-	-
Plcb1	2:134786158-135583584	up	not expressed	not expressed	-
Pigt	2:164497519-164508301	-	-	-	-
Syt1	10:108497649-109010982	-	-	not expressed	-
Gm9828	13:98309895-98324415	-	not expressed	-	not expressed
B4galt3	1:171270327-171281186	-	-	-	-
Gm3883	4:42456964-42461867	-	not expressed	not expressed	not expressed
Mblac1	5:138194313-138195621	-	-	-	-
Tmem254c	14:26063918-26067355	-	-	-	-
Chsy3	18:59175400-59410446	-	-	not expressed	not expressed
Efemp1	11:28853203-28926743	-	-	-	-
Gm13904	2:107010937-107011774	-	-	-	-
Gucy1a2	9:3532353-3897342	-	not expressed	not expressed	not expressed
Rsph9	17:46110985-46144216	-	not expressed	not expressed	-
Gm8213	6:116195417-116195858	-	-	-	-
Neurl1a	19:47178819-47259440	-	not expressed	-	not expressed
Gm12244	11:57880895-57881186	-	-	-	-
Cav1	6:17197750-17385604	-	not expressed	-	-
Ctdsp1	1:74391508-74397285	-	-	-	-
Hlf	11:90336535-90390895	-	-	-	-
Slc16a3	11:120948479-120960868	-	not expressed	-	-
Gm7879	5:43913172-43913706	-	-	-	-
Rnf149	1:39547569-39577405	-	-	-	-
Jkamp	12:72085588-72185029	-	-	-	-
Ybx3	6:131364857-131388450	-	-	-	-
A930011O12Rik,Mir124a-1,Mir3078	14:64587330-64593961	-	not expressed	not expressed	not expressed
Arhgap32	9:32116135-32268446	-	not expressed	not expressed	-
Olfm2	9:20667985-20728219	-	not expressed	not expressed	-
Rpl31-ps11	3:94604407-94604784	-	-	-	-
Glt8d2	10:82629827-82690650	-	not expressed	not expressed	-
Crh	3:19693400-19695396	-	not expressed	not expressed	not expressed
Hsf4	8:105269800-105275845	-	-	-	-
Gm15501	7:93178982-93179669	-	-	up	-
Gm7117	X:105725127-105725514	-	-	-	-
Ngef	1:87476833-87597845	-	-	not expressed	not expressed
Rpl28-ps3	4:126058564-126092195	-	up	-	-
Mt1	8:94179088-94180325	-	-	-	down
Rps15a-ps5	5:105699968-105832436	-	-	-	-
Rpl17-ps8	X:96306177-96574485	-	-	-	-
Zfp277	12:40315045-40445790	-	-	-	-
Tank	2:61578584-61654171	-	-	-	-
Ndufb7	8:83566670-83571626	-	-	-	-
Rps5	7:12922289-12926686	-	up	-	-
Slc25a28	19:43663821-43674881	-	-	-	-
Trib1	15:59648349-59656550	-	-	-	-
Dusp1	17:26505589-26508519	-	-	-	-
Arrdc1	2:24925351-24935252	-	-	-	-
Cobl	11:12236607-12464960	-	-	-	-
Gm6863	12:96922419-96923061	-	-	-	-
Gm11585	11:102124071-102124640	-	-	-	-
Snrpe	1:133603870-133610291	-	-	-	-
Gda	19:21391306-21473445	up	-	-	-
Exosc1	19:41922979-41933314	-	-	-	-
Mir134,Mir3072,Mir369,Mir377,Mir382,Mir410,Mir412,Mir485,Mir668,Mirg	12:109729763-109749460	-	not expressed	not expressed	not expressed
Fabp3	4:130308161-130359943	-	not expressed	-	not expressed
Mlip	9:77102080-77352969	-	not expressed	-	not expressed
Usp28	9:48985384-49042517	-	-	-	not expressed
Ndufs6	13:73319873-73328542	-	-	up	-
Galntl6	8:57776224-57962564	-	not expressed	not expressed	not expressed
Rad23a	8:84831521-84840665	-	-	-	-
Gm11942	4:32964887-32965232	-	up	-	-
Gm11451	2:162898893-162899523	-	-	-	-
Gm13340	2:22227502-22618252	-	-	-	-
Gpr22	12:31654868-31950535	-	not expressed	not expressed	not expressed
Cactin	10:81321102-81326251	-	-	-	-
Sap30l	11:57801636-57810217	-	-	-	-
Itpr1	6:108213117-108551109	-	-	-	-
Igsf9b	9:27299227-27334763	-	not expressed	not expressed	not expressed
Gm13532	2:57628988-57629228	-	-	-	-
Bad	19:6938068-6951898	-	-	-	-
Dennd1a	2:37776248-38287390	-	-	-	-
Lamb1	12:31265233-31329644	-	-	-	-
Gng3	19:8836928-8848683	-	not expressed	not expressed	-
Gm5939	X:78855407-78858281	-	-	-	-
Erf	7:25242560-25250761	-	-	-	-
Nfxl1	5:72513300-72559684	-	-	-	-
Gm5806	15:82516310-82519278	-	-	-	-
Cox4i2	2:152754172-152765037	-	not expressed	-	-
Mpped2	2:106693268-106868356	-	not expressed	-	not expressed
Ppp1ca	19:4192157-4201603	-	-	-	-
Rpl31-ps15	3:37734729-37735104	-	-	-	-
2300009A05Rik	9:63394446-63602493	-	-	-	-
Gm4705	17:66336981-66449750	-	-	-	-
Atpif1	4:132530554-132533659	-	-	-	-
4930570G19Rik	3:156546752-156561746	-	not expressed	not expressed	-
Gm266	12:111484610-111485823	-	not expressed	not expressed	not expressed
Uchl3	14:101653966-101696124	-	-	-	-
Adrbk1	19:4286000-4306222	-	-	-	-
Gm16580	17:26252909-26285504	-	-	-	-
Gm10074	17:36226022-36226271	-	-	-	-
Msantd2	9:37489320-37524148	-	-	-	-
Dlx5	6:6877804-6882085	-	not expressed	not expressed	not expressed
Rbm24	13:46418299-46431090	-	not expressed	-	not expressed
Fosb	7:19302720-19310045	-	not expressed	not expressed	not expressed
Fxyd1	7:31051680-31055656	-	-	-	-
Atp2b1	10:98915151-99026143	-	-	-	-
Atp5k	5:108433243-108434448	-	-	-	-
Cmklr1	5:113612353-113650426	-	-	-	-
Hivep3	4:119733783-120138045	-	not expressed	-	-
Tesc	5:118027742-118061878	-	not expressed	not expressed	not expressed
Scai	2:39066213-39190730	-	not expressed	not expressed	not expressed
Mrpl40	16:18836577-18970309	-	-	-	-
Cd34	1:194938818-195038908	-	not expressed	-	-
Slc8a2	7:16130299-16160509	-	not expressed	not expressed	not expressed
Timm17b	X:7899356-7908351	-	-	-	-
Mrps10	17:47368886-47381417	-	-	-	-
Atxn2	5:121711336-121836859	-	-	-	-
Gm15843	1:72427111-72536930	-	-	-	-
Orc3	4:34570795-34614944	-	-	-	-
Gm7266	1:144312031-144312436	-	-	-	-
Hnrnpd	5:99958425-99978938	-	-	-	-
Fam162a	16:36043843-36071515	-	-	-	-
B230118H07Rik,Rag1	2:101560780-101649532	-	-	-	-
Gm13827	5:115011136-115098790	-	-	-	-
Cbfa2t3	8:119910359-124345724	-	-	-	-
Uqcrb	13:66900616-66998401	-	-	-	-
Gm6548	17:78850791-78851956	-	-	-	-
Dnajc7	11:100574903-100704271	-	-	-	-
Lrrc32	7:98494221-98501831	-	-	-	-
Stradb	1:58973521-58995715	-	-	-	-
Gm10263	13:73317843-73318143	-	-	-	-
Naa20	2:145902098-145916425	-	-	-	-
Nrm	17:35860917-35875596	-	not expressed	-	-
Fzd3	14:65201025-65262463	-	not expressed	not expressed	not expressed
Stx3	19:11775118-11819403	-	not expressed	not expressed	not expressed
Rps11	7:45122387-45124389	-	up	-	-
Uqcc3	19:8880015-8880933	-	-	-	-
Mark4	7:19426074-19458494	-	-	-	-
Strbp	2:37443278-37703859	-	-	-	-
St8sia3	18:64157720-64277180	-	not expressed	not expressed	not expressed
Lipt1	1:37871737-37890411	-	-	-	-
Ankrd13b	11:77470484-77489678	-	-	-	-
Cfap61	2:145917478-146215039	-	not expressed	not expressed	not expressed
Gm4468	15:99734880-99875428	-	-	-	-
Osbpl3	6:50293329-50456201	-	not expressed	-	-
Cnksr2	X:157821435-158043294	up	not expressed	not expressed	not expressed
Ltbp3	19:5740903-5771401	-	not expressed	-	-
Dnajc13	9:104002543-104263617	-	-	-	-
Coq7	7:118509658-118533356	-	-	-	-
Jph3	8:119910359-124345724	-	not expressed	not expressed	not expressed
Zfp358	8:3493137-3497208	-	-	-	-
Sympk	7:19024376-19054618	-	-	-	-
Ndufb10	17:24722059-24724478	-	-	-	-
Fam49a	12:12262138-12376359	up	not expressed	not expressed	-
Gm13226	4:145576888-145577292	-	-	-	-
Gm11948	11:3344255-3409189	-	not expressed	not expressed	not expressed
Gm13622	2:69722544-69754012	not expressed	-	-	-
Rpl36a-ps3	6:136488806-136489127	-	-	-	-
Mrps36-ps2	7:105634202-105721799	-	-	-	-
Serpinb8	1:107590005-107610484	-	-	-	-
Zbtb17	4:141444653-141538597	-	-	-	-
Rpl35a-ps4	2:108874925-108875258	-	-	-	-
Eif3h	15:51786557-51865481	-	-	-	-
Map3k11	19:5689130-5702862	-	-	-	-
Gpatch4	3:88043107-88055993	-	-	-	-
Zfp932	5:109996520-110010411	-	-	-	-
Scrt1	15:76516202-76522129	-	not expressed	not expressed	not expressed
Gm15921	5:130171797-130214342	-	-	-	-
Wbp2	11:116078572-116086995	-	-	-	-
Mrpl47	3:32706297-32751566	-	-	-	-
Rbm22	18:60560735-60572810	-	-	-	-
Pclo	5:14514917-14860184	-	not expressed	not expressed	not expressed
Gm26618	X:6027055-6092269	not expressed	not expressed	not expressed	not expressed
Cadm4	7:24482022-24504539	-	-	-	-
Rgs9	11:109225354-109298129	-	not expressed	not expressed	not expressed
Col6a2	10:76595761-76623630	-	not expressed	-	-
Mllt4	17:13482552-13906150	-	-	-	-
Cck	9:121489824-121495689	-	not expressed	not expressed	-
Igfbp7	5:77310146-77408045	-	-	-	-
E430024P14Rik	17:7881105-7979824	-	not expressed	not expressed	not expressed
Nnat	2:157556361-157571274	-	not expressed	-	-
Gabra4	5:71569733-71658308	-	not expressed	not expressed	not expressed
Gm16200	9:90163068-90270804	-	-	-	-
Taf10	7:105732206-105744361	-	-	-	-
Rrp9	9:106470321-106485424	-	-	-	-
Ppp2r2d	7:138835822-138883057	-	-	-	-
Zc3h6	2:128966592-129021756	-	not expressed	-	-
Gcnt2	13:40859767-41013019	-	-	-	-
Gm5045	15:59210907-59211720	-	-	-	-
3110039M20Rik,Foxg1	12:49382692-49407346	-	not expressed	not expressed	not expressed
Rnf39	17:36942917-36947986	-	-	not expressed	not expressed
Rtf1	2:119675067-119735407	-	-	-	-
Macrod1	19:7056767-7198061	-	-	up	-
Rpsa-ps1	1:163623792-163624678	-	-	-	-
Zscan22	7:12897814-12909083	-	-	-	-
Utp14a	X:48256861-48285426	-	up	-	-
Mcts2	2:152669460-152708670	-	-	-	-
Gm13304	4:42114816-42115917	-	not expressed	-	-
Gsk3a	7:25228257-25237851	-	-	-	-
Fbxl16	17:25794570-25985680	-	not expressed	not expressed	-
Akap5	12:76324890-76334153	-	not expressed	not expressed	not expressed
2010012O05Rik	19:46689905-46703382	-	-	-	-
Pkmyt1	17:23726335-23740330	-	not expressed	not expressed	-
Nmd3	3:69721984-69756373	-	-	-	-
Nt5c3	6:56882399-56923932	-	-	-	-
Tagln2	1:172500046-172507380	-	-	-	-
Bcl7c	7:127663352-127708933	-	-	-	-
Slx1b	7:126687458-126697058	-	-	-	-
Tmem88	11:69391924-69398234	-	-	-	-
Rpl35a-ps3	17:29135055-29148980	-	-	-	-
Cnih1	14:46775581-46788411	-	-	-	-
E130012A19Rik	11:97627388-97629702	-	not expressed	not expressed	not expressed
Gm24528	7:59415589-59415668	not expressed	not expressed	not expressed	not expressed
1110032F04Rik	3:68867916-68872163	-	not expressed	not expressed	not expressed
Ndufv3	17:31520114-31531326	-	-	-	-
Gpi1	7:34202121-34230289	-	-	-	-
Csrp2	10:110920176-110939599	-	-	-	-
Gcat	15:79030873-79043558	-	-	-	-
Aarsd1,Gm27029,Ptges3l	11:101406663-101435673	-	-	-	-
Enkur	2:21180730-21205365	-	not expressed	not expressed	not expressed
Zfp800	6:28215554-28398005	-	-	-	-
Mcoln1	8:3500456-3515232	-	-	-	-
Zfp260	7:30094776-30107622	-	-	-	-
Abcb6,Atg9a	1:75171716-75210813	-	-	-	-
Camk2a	18:60925617-60988152	-	not expressed	-	-
Saal1	7:46686107-46710680	-	-	-	-
Abhd17a	10:80583653-80590341	-	-	-	-
Gm15483	7:133686242-133881532	-	-	-	-
Rasgrp1	2:117279992-117343001	-	not expressed	not expressed	not expressed
Myl4	11:104550662-104595753	-	not expressed	-	-
Rpl4	9:64173386-64178562	-	-	-	-
Suds3	5:117091681-117118723	-	-	-	-
Tshz2	2:169633012-170071816	-	-	-	-
Bai2	4:129984869-130022633	-	not expressed	not expressed	-
Rhobtb2	14:69784989-69805530	-	-	-	-
Ndufc2	7:97400002-97407802	-	-	up	-
Chrm4	2:91927248-91928688	-	not expressed	not expressed	not expressed
Mllt1	17:56892611-56935388	-	-	-	-
Gm22680,Gm22744,Gm23246,Gm24452,Gm24453,Gm25855,Gm25894,Snhg1,Snord22	19:8723495-8726442	-	-	-	-
Slc8a1	17:81388690-81649607	-	not expressed	-	-
Atf7,Gm28047,Npff	15:102523838-102625464	-	-	-	-
Map1lc3a	2:155276296-155278073	-	-	-	-
Gm14336	2:173920351-173920826	-	-	-	-
Zfr2	10:81233154-81252123	-	not expressed	-	not expressed
Frmd6	12:70825513-70902232	-	-	-	-
Tom1l1	11:90638172-90688366	-	-	-	-
Gm13653	2:75138841-75322897	-	-	-	-
Zswim7	11:62267223-62281375	-	-	-	-
Rbfox1	16:6809221-7412479	-	not expressed	-	not expressed
Parp6	9:59617283-59650290	-	-	-	-
Psmc1	12:100110185-100123364	-	-	-	-
Prph	15:99055173-99058978	-	not expressed	not expressed	not expressed
Prdm8	5:98180868-98187448	-	not expressed	not expressed	not expressed
B3galnt2	13:13954673-14039638	-	-	-	-
Ddx26b	X:56454856-56507843	-	-	-	-
AW495222	13:93674432-93752831	-	not expressed	not expressed	not expressed
Rpl35a-ps6	5:123252101-123327484	-	-	-	-
Slc16a13	11:70216788-70221064	-	-	not expressed	-
Rps6-ps1	15:76337615-76338365	-	-	-	-
Gm15267	X:152016427-152062694	-	-	-	-
AF357355,DQ267100,Gm23508,Gm24895,Gm27350,Rian	12:109603881-109661716	-	not expressed	up	-
Clic1	17:35049965-35058749	-	-	-	-
Cox8a	19:7215157-7217616	-	-	-	-
Med14	X:12675368-12762073	-	-	-	-
Rpl8	15:76904070-76906318	-	-	-	-
Cyp4f13	17:32924687-32947402	-	-	-	-
Ppa2	3:133310109-133378235	-	-	-	-
Kcnj11	7:46098724-46099897	-	not expressed	-	not expressed
Zfp579	7:4983482-4996158	-	-	-	-
Tm2d1	4:98355369-98383306	-	-	-	-
Acot13	13:24817947-24831517	-	-	-	-
Ccdc88b	19:6844622-6858211	-	not expressed	not expressed	not expressed
Ino80dos	1:62958417-63180486	-	not expressed	-	-
Gm14274	2:172100620-172101235	-	-	-	-
Lrrc4	6:28475138-28935162	-	not expressed	not expressed	not expressed
Rpl27-ps1	1:171305086-171305494	-	-	-	-
Lmf2	15:89351003-89355659	-	-	-	-
Zfp771	7:127244525-127254803	-	-	-	-
Plekha5	6:140424098-140594906	-	-	not expressed	-
Ints1	5:139751281-139775678	-	-	-	-
Cxadr	16:78301495-78359785	-	-	not expressed	-
Gm10177	9:37229148-37255738	-	-	-	-
Wnt2	6:17988939-18030585	-	-	not expressed	not expressed
C130074G19Rik	1:184871925-184883218	up	-	-	-
Rps2-ps5	14:69158670-69159519	-	-	-	-
Gm7353	7:3108534-3111950	-	-	-	-
Arhgdib	6:136923522-136941899	-	-	-	-
Lppr3	10:79851380-79883174	-	not expressed	not expressed	-
Gm4246	17:36194595-36194811	-	-	-	-
Acsbg1	9:54604876-54661870	-	not expressed	not expressed	not expressed
Dyrk1b	7:28179468-28187294	-	-	-	-
Zfp160	17:21008940-21028852	-	-	-	-
Rpl13	8:119910359-124345724	-	-	-	-
Prkcb	7:122288750-122634402	up	not expressed	not expressed	-
6330408A02Rik	7:13258966-13311433	-	-	-	-
Pitpnm2	5:124118689-124249760	-	-	-	-
Rps12-ps10	2:122219992-122220391	-	-	-	-
Gm8186	17:26098871-26099257	-	-	-	-
Kcnh5	12:74897216-75177332	-	not expressed	not expressed	not expressed
Asf1a	10:53536328-53630439	-	-	-	-
Nfat5	8:107293469-107379517	-	-	-	-
Ankrd37	8:45975527-46029477	-	-	-	not expressed
Dnajc19-ps	7:103882653-103883004	-	-	-	-
Adra1d	2:131545849-131563179	-	not expressed	not expressed	-
Slc39a14	14:70303468-70351425	-	-	-	-
Zfp420	7:29859978-29877292	-	not expressed	-	-
Mrpl39	16:84717575-84735742	-	-	-	-
Nacc1	8:84670482-84699808	-	-	-	-
Slc25a23	17:57041774-57065918	-	-	-	-
TTC14,Ttc14	3:33800194-33844310	-	-	-	-
Rps12-ps12	X:124599363-124599762	-	-	-	-
Gpr26	7:130162450-133124354	-	not expressed	not expressed	not expressed
mt-Tl1	MT:2675-2750	-	-	-	-
Cacna1b	2:24603886-24763152	-	not expressed	not expressed	not expressed
4930447M23Rik	2:19344316-19351050	-	not expressed	not expressed	not expressed
Alpl	4:137741732-137796384	-	-	-	-
Gm25604	4:126753543-126968135	not expressed	not expressed	not expressed	not expressed
Atp9a	2:168634437-168742409	-	-	-	-
Gm6263	13:74009406-74035753	-	-	-	-
Angptl6	9:20868641-20879727	-	-	-	-
Camk2n1	4:138454313-138460123	-	-	-	-
Ubl5	9:20618117-20647140	-	-	-	-
RP23-103B18.6	1:191407665-191408247	-	-	-	-
Oxa1l	14:54360840-54409472	-	-	-	-
Foxo6	4:120267078-120287349	-	not expressed	-	not expressed
Tmsb15b1,Tmsb15b2,Tmsb15l	X:136954987-136976874	-	-	-	-
Pdzrn3	6:101149608-101377897	-	-	-	-
Rps4x	X:102184940-102189394	-	up	-	-
Cc2d2a	5:43662378-43740972	-	not expressed	-	-
Wnk4	11:101260566-101277409	-	not expressed	not expressed	not expressed
Gm3355	17:13482552-13906150	-	-	-	-
Rnf126	10:79758514-79766952	-	-	-	-
3110082I17Rik	5:139359738-139460502	-	-	-	-
Grin2a	16:9577709-9994921	-	not expressed	not expressed	not expressed
4931415C17Rik	8:12614276-12679229	not expressed	not expressed	not expressed	not expressed
Fuca1	4:135920734-135940311	-	-	-	-
Pus3	9:35558594-35690318	-	-	-	-
Sema4a	3:88435958-88461182	-	-	-	-
Man2c1os	9:57072039-57142722	-	-	-	-
Gm9385	9:115909454-116076176	-	-	-	-
Thbs4	13:92751589-92794818	-	not expressed	-	not expressed
Gm12013	11:17095489-17095644	-	-	-	-
Adamtsl5	10:80339109-80348412	-	not expressed	-	-
Ufsp2	8:45975527-46029477	-	-	-	-
Ggct	6:54982579-54992950	-	-	-	-
Taf4a	2:179912145-179979013	-	-	-	-
Tcte2	17:13482552-13906150	-	not expressed	not expressed	not expressed
Gm5472	15:45978357-45980037	-	not expressed	-	-
Txn2	15:77915046-77929006	-	-	-	-
Gm694	4:141432671-141436105	-	not expressed	not expressed	not expressed
Pitpnm1	19:4099997-4113965	-	-	-	-
Prrc2a	17:35149075-35164897	-	-	-	-
Gm3625	12:4592825-4592927	not expressed	not expressed	-	not expressed
Pnpla7	2:24976032-25054057	-	-	-	-
Gm6275	X:136929785-136930907	-	-	-	-
Zfp787	7:6131488-6155971	-	-	-	-
H1fx	6:87980420-88045270	-	not expressed	-	-
Ankrd63	2:118699102-118703963	-	not expressed	not expressed	not expressed
Plod3	5:136982163-136996648	-	-	-	-
Icam5	9:21015959-21039036	-	not expressed	not expressed	not expressed
Hivep2	10:13966074-14154446	-	-	-	-
Mbd2	18:70568188-70626131	-	-	-	-
Gstm1	3:108012254-108017973	-	-	-	-
RP23-243N8.1	3:3939143-3939462	-	-	-	-
Gm7467	5:76304875-76305527	-	not expressed	not expressed	not expressed
Htr2a	14:74640839-74706859	-	not expressed	not expressed	not expressed
Hagh	17:24840142-24864450	-	-	-	-
Gm21970,Ifnar2,Il10rb	16:91372782-91425834	-	-	-	-
Rfc5	5:117357303-117389047	-	-	-	-
Foxp2	6:14901348-15441977	-	not expressed	not expressed	not expressed
1110032A03Rik	9:50762827-50843542	-	-	-	-
Tmem63c	12:87021339-87090043	-	not expressed	not expressed	not expressed
B230307C23Rik	16:97994600-98010000	-	-	-	-
Arhgap10	8:77250365-77523898	-	not expressed	-	-
Pi4ka	16:17276299-17430826	-	-	-	-
Tubg1	11:101119937-101126419	-	-	-	-
Gm25017	7:59602646-59602725	not expressed	not expressed	not expressed	not expressed
Dcaf15	8:84097074-84104773	-	-	-	-
Gm5866	5:52582319-52583227	-	-	-	-
Mad2l1bp	17:46147389-46153553	-	-	-	-
Zcchc9	13:91796532-91807705	-	-	-	-
Stk32c	7:139103637-139242979	-	not expressed	not expressed	not expressed
Tmem191c	16:17276299-17430826	-	-	-	-
Tinagl1	4:130164453-130175122	-	-	-	-
Ptges	2:30889470-30929863	-	not expressed	-	-
Cited4	4:120666571-120667820	-	not expressed	-	not expressed
Fam181b	7:93006981-93104789	-	not expressed	not expressed	-
Drd1a	13:54051185-54055658	-	not expressed	not expressed	not expressed
Phactr1	13:42680622-43138526	-	not expressed	not expressed	-
Eef2	10:81176630-81182507	-	-	-	-
Ubap2l	3:89999588-90068347	-	-	-	-
Arsb	13:93771678-93943016	-	-	-	-
Slc35b3	13:38932139-38966299	-	-	-	-
Gm7694,Nos1ap	1:170298198-170589861	-	-	not expressed	-
Gp9	6:87778135-87779762	not expressed	not expressed	not expressed	not expressed
Ankrd34a	3:96596635-96599775	-	not expressed	not expressed	not expressed
Mon1a	9:107888150-107903139	-	-	-	-
Ebf1	11:44617316-45008091	not expressed	not expressed	-	-
Gpx8	13:113035110-113091195	-	not expressed	-	-
Cep128	12:90998491-91384409	-	not expressed	not expressed	-
Ube2r2	4:41135742-41193380	-	-	-	-
Mapk8	14:33377897-33447158	-	-	-	-
Lxn	3:67430095-67476529	-	-	-	-
Poc1a	9:106281060-106350521	-	-	-	-
Nmbr	10:14705590-14770850	-	not expressed	not expressed	not expressed
Gm13675	2:82507215-82507744	-	-	-	-
Lmo7	14:101729956-101934710	-	-	-	-
Rpsa-ps4	11:33038815-33039703	-	-	-	-
Lcmt1	7:123377981-123430358	-	-	-	-
Gm27000	X:88759470-88760312	-	not expressed	up	-
Dgkz	2:91932823-91975864	-	-	-	-
Gm13215	4:132148412-132148884	-	-	-	-
Ephb6	6:41605481-41620509	-	-	-	-
Psmd12	11:107479483-107504362	-	-	-	-
Rnf214	9:45838579-45936058	-	-	-	-
Dxo	17:34837018-34850210	-	-	-	-
Gm10221	5:24581457-24581879	-	-	-	-
Kcnip4	5:48389501-49524904	-	not expressed	not expressed	not expressed
Sugp1	8:70042812-70071953	-	-	-	-
Tuba4a	1:75210837-75219865	-	-	-	-
Map3k6	4:133240817-133252929	-	not expressed	-	-
Gm12226	11:54370651-54426790	-	-	-	-
Rpl7a-ps10	9:97179178-97179976	-	-	-	-
Nin	12:70011434-70111925	-	not expressed	-	-
Pamr1	2:102550011-102643041	-	-	-	-
Rab3ip	10:116905783-116950380	-	-	-	-
Zfp354a	11:51059256-51072799	-	-	-	-
Rpl17	18:75000476-75003381	-	up	-	-
Rpl36al	12:69182730-69184083	-	-	-	-
Necab3	2:154544398-154558890	-	not expressed	not expressed	not expressed
Gm7808	9:19927895-19928282	-	up	-	-
Ptpmt1	2:90894633-90918258	-	-	-	-
Nbn	4:15957924-15992589	-	-	-	-
Rps12-ps1	X:103489516-103489917	-	-	-	-
Psmb2	4:126677629-126709714	-	-	-	-
Slc26a6	9:108853282-108913049	-	-	-	-
Otx1	11:21994763-22002897	-	not expressed	not expressed	not expressed
Eif3s6-ps1	11:9737151-9737621	-	-	-	-
Rpl24,Zbtb11	16:55966274-56029739	-	-	-	-
Gm10136	19:28990493-29017569	-	up	-	-
Kcnv1	15:45106283-45114934	-	not expressed	not expressed	not expressed
Gm12034	11:20446411-20446810	-	-	-	-
Cacng2	15:77991747-78144142	-	not expressed	not expressed	not expressed
Hgs	11:120467634-120483984	-	-	-	-
Ing1	8:11556065-11563250	-	-	-	-
Bmp2	2:133552158-133562885	-	-	not expressed	-
Crip2	12:113140235-113145504	-	down	-	-
Cln6	9:62838784-62875918	-	-	-	-
Gm4899	8:81197626-81198214	-	-	-	-
Map6	7:99267446-99337137	-	not expressed	-	-
Serinc2	4:130253494-130279205	-	down	-	not expressed
Gm13430	2:36389131-36389419	-	-	-	-
Mypop	7:18989553-19001766	-	down	-	-
Ndufa2	18:36735067-36744557	-	up	-	-
Gm7545	6:86284886-86285894	-	-	-	-
Flrt1	19:7056767-7198061	-	not expressed	not expressed	not expressed
Coq10b	1:55051318-55072702	-	-	-	-
Gm6623	17:36179113-36179657	-	-	-	-
Insm1	2:146221920-146225020	-	not expressed	not expressed	not expressed
Eri3	4:117550364-117674297	-	-	-	-
Cript	17:87025549-87035810	-	-	-	-
Wdr74	19:8735838-8740623	-	-	-	-
Ccni	5:93181932-93206495	-	-	-	-
Cacna1d	14:30009022-30527056	-	not expressed	not expressed	not expressed
Cyba	8:119910359-124345724	-	-	-	-
Eed	7:89954655-89981848	-	-	-	-
Gm16485	9:8971790-8975773	-	not expressed	not expressed	not expressed
Trpv4	5:114622151-114658421	not expressed	not expressed	not expressed	-
Pelo	13:114958078-115101964	-	-	-	-
H2afy3	15:62037985-62378096	-	not expressed	not expressed	not expressed
Dnhd1,Timm10b	7:105634202-105721799	-	-	-	-
Ndufb5	3:32706297-32751566	-	-	-	-
Bmp7	2:172868011-172940321	-	not expressed	not expressed	not expressed
Tma16	8:66474329-66486530	-	not expressed	-	-
Rps18-ps3	8:107262816-107263248	-	-	-	-
Ndufaf3	9:108560285-108567434	-	-	-	-
Gm6433	5:141241489-142215586	-	-	-	-
Hmgn1	16:96120617-96127729	-	-	-	-
Kctd1	18:14968684-15151446	-	not expressed	not expressed	not expressed
Fgf12	16:28160119-28445227	-	not expressed	not expressed	not expressed
Klhdc4	8:119910359-124345724	-	-	-	-
2610008E11Rik	10:79064373-79097600	-	-	-	-
Vars2	17:35651827-35667592	-	-	-	-
Eml5	12:98746967-98901484	-	not expressed	not expressed	not expressed
Gm12380	4:38263917-38264461	not expressed	-	not expressed	-
Ppp1r1b	11:98348403-98358283	-	-	not expressed	not expressed
Gabarap	11:69991142-69994951	-	-	-	-
Tiparp	3:65507256-65555518	-	-	-	-
Pglyrp1	7:18884689-18890438	-	not expressed	not expressed	-
B9d2	7:25681157-25686558	-	-	-	-
Ndufb9	15:58933809-58939489	-	-	-	-
Crlf2	5:109554710-109558993	-	-	-	-
Tlcd1	11:78176710-78183584	-	-	-	-
Fgd6	10:94036000-94145339	-	-	-	not expressed
Npy	6:49822709-49829507	-	not expressed	not expressed	not expressed
Gm15361	X:74494378-74494822	-	-	-	-
Rps9	7:3703992-3706901	-	-	-	-
Chat	14:32408202-32483539	-	not expressed	not expressed	not expressed
Fam78b	1:167001416-167091302	-	not expressed	not expressed	-
Gm25117	10:111473191-111498142	-	not expressed	not expressed	-
Pth1r	9:110722087-110743686	-	-	not expressed	-
Hnmt	2:24002909-24049394	up	-	-	-
Vsnl1	12:11325246-11436649	-	not expressed	not expressed	-
Numb	12:83794033-83921934	-	-	-	-
Fer	17:63896017-64139494	-	-	-	-
Gm21981,Prickle4,Tomm6	17:47611581-47704286	-	-	-	-
Gpm6a	8:54954727-55060877	-	not expressed	not expressed	-
Tgfbi	13:56609602-56639339	not expressed	-	-	-
Ext1	15:53064037-53346159	-	-	-	-
Gm8565	3:69566450-69567464	-	-	-	-
Gm2007	2:175741536-175751419	-	-	-	-
Tatdn2	6:113697049-113711069	-	-	-	-
Casp3	8:46617448-46638706	-	-	not expressed	-
Btbd17	11:114791216-114795945	-	not expressed	not expressed	not expressed
Lsm5	6:56701062-56704692	not expressed	-	not expressed	-
Slc7a8	14:54722215-54781886	-	not expressed	-	-
Ntng2	2:29194540-29253006	-	-	-	-
Xpa	4:46038934-46196311	-	-	-	-
Zfhx2	14:55053868-55106593	-	-	-	not expressed
Zcchc10	11:53324678-53333301	-	-	-	-
Lcat	8:105934332-105966115	-	-	not expressed	-
Dnph1	17:46442447-46831413	-	-	-	not expressed
Rpgr,Srpx	X:10037976-10216920	-	not expressed	-	-
Gm5303	6:28215554-28398005	-	-	-	-
Gm7436	9:105545436-105545827	-	-	up	-
Wrap73	4:154142371-154167420	-	-	-	-
Snrpa1	7:66060298-66074582	-	-	-	-
Kcnb2	1:15287253-15723750	-	not expressed	not expressed	not expressed
Syndig1l	12:84677277-84698807	-	not expressed	not expressed	not expressed
Cdh10	15:18818946-19014236	-	not expressed	not expressed	not expressed
Ccs	19:4825365-4839322	-	-	-	-
Txn1	4:57943372-57956411	-	-	-	-
Rpsa-ps12	4:149142496-149143388	-	-	-	-
Rsg1	4:141213955-141226756	-	not expressed	not expressed	not expressed
Mvk	5:114444268-114460591	-	-	-	-
Grm2	9:106644536-106656109	-	not expressed	not expressed	not expressed
Lyar	5:38220469-38234306	-	-	-	-
B9d1	11:61505143-61512931	-	not expressed	-	-
Srpk1	17:28587647-28622521	-	-	-	-
Rps20	4:3831333-3835665	-	-	-	-
Cops5	1:10024600-10136768	-	-	-	-
Lppr5	3:117575226-117689507	-	not expressed	not expressed	not expressed
Ezr	17:6673457-6782784	-	-	not expressed	-
Ovol2	2:144305174-144332639	-	not expressed	not expressed	not expressed
Rgs7bp	13:104947152-105054930	-	not expressed	not expressed	not expressed
Tcf4	18:69344145-69687967	-	-	-	-
A830052D11Rik	18:32359056-32435736	not expressed	not expressed	-	not expressed
Hat1	2:71388957-71441622	-	-	-	-
Sox12	2:152393610-152398063	-	-	not expressed	-
Immp1l	2:105904637-105965558	-	-	-	-
Scn1b	7:31116523-31126945	-	-	-	-
Usp3	9:66514636-66593142	-	-	-	-
H6pd	4:149979474-150009023	-	-	-	-
Fbxo2	4:148160620-148166424	-	not expressed	not expressed	not expressed
Mrpl17	7:105752988-105863650	-	-	-	-
Nenf	1:191306788-191318194	-	-	-	-
Zfp553	7:127233060-127238179	-	-	-	-
Hs3st1	5:39613934-39755475	-	not expressed	-	-
Car10	11:93098027-93601749	-	not expressed	not expressed	not expressed
Btf3l4	4:108814294-108833614	-	-	-	-
Atp5j2	5:145183697-145192062	-	-	-	-
Palm3	8:84021470-84042575	-	not expressed	not expressed	not expressed
Gm5421	10:22158568-22374139	-	-	-	-
Gm6142	16:4287528-4420498	-	-	-	-
Gprc5c	11:114851151-114872617	-	-	-	-
Map3k1	13:111746427-111808993	-	-	-	-
Rab11fip2	19:59902883-59943654	-	-	-	-
Etv4	11:101769741-101785371	-	not expressed	not expressed	not expressed
Ptms	6:124913680-124925844	-	-	-	-
Ftl1	7:45457943-45459884	-	-	-	-
Gm14639	X:56155527-56156393	-	-	-	-
Kcnj8	6:142564938-142571356	-	-	-	-
Shank3	15:89499622-89560261	-	-	-	-
Glrx	13:75839867-75850151	-	-	-	-
Gm4149	13:75644863-75645226	-	-	-	-
Calb1	4:15881263-15908064	-	not expressed	not expressed	not expressed
Dguok	6:83480216-83506969	-	-	-	-
Psmb6-ps2	1:101385885-101386590	-	-	-	-
Aebp1	11:5861946-5872088	-	-	-	-
Gpr34	X:13517079-13851367	-	not expressed	not expressed	-
Ablim3	18:61799394-61911852	-	-	-	-
Slc46a3	5:147878436-147894815	-	-	-	-
Fam124a	14:62555736-62608486	-	-	not expressed	-
Gm6374	1:83254138-83408200	-	-	-	-
Pnpla2	7:141455197-141460743	-	-	-	-
Snord71	8:109778553-109868455	-	-	-	-
Fkbp2	19:6977740-6980461	-	-	-	-
D7Ertd715e	7:59619157-59904686	not expressed	not expressed	not expressed	not expressed
Cacng3	7:122670491-122769393	-	not expressed	not expressed	not expressed
Tmem160	7:16452778-16455489	-	-	-	-
Ppp1r11	17:36948355-36951741	-	-	-	-
Atn1,Grcc10	6:124739182-124756524	-	-	-	-
Plscr3	11:69846375-69858730	-	-	-	-
Lrrc24	15:76710622-76723845	-	-	-	-
Mrpl23	7:142532798-142540747	-	-	-	-
C1ql1	11:102838472-103101658	-	not expressed	not expressed	not expressed
Eif3l	15:79075222-79094400	-	-	-	-
Pcgf2	11:97688822-97700497	-	-	-	-
Cidea	18:67321208-67367794	-	not expressed	-	-
C130071C03Rik,Mir9-2	13:83721380-83884194	-	not expressed	not expressed	not expressed
Lclat1	17:73107984-73243368	-	-	-	-
Tfg	16:56690331-56717450	-	-	-	-
Sap130	18:31634370-31723061	-	-	-	-
Ier3	17:35821683-35822923	-	-	-	-
Cog2	8:124520766-124552008	-	-	-	-
Gm11918	4:29125945-29126124	-	-	-	-
Ube3b	5:114380627-114421168	-	-	-	-
Cyp2d22	15:82370527-82380260	-	-	-	-
B3galnt1	3:69574157-69598960	-	not expressed	-	-
Npas2	1:39193730-39363236	-	not expressed	not expressed	not expressed
Eef1d	15:75894795-75909556	-	-	-	-
Zbtb45	7:13004935-13009822	-	-	-	-
Snrpd2	7:19149721-19152735	-	-	-	-
Ino80b	6:83121764-83125431	-	-	-	-
Pde3b	7:114415280-114539251	-	-	-	-
Ccdc130	8:84257794-84270380	-	-	-	-
Psmd8	7:29174187-29180701	-	-	-	-
Cmc2	8:116888684-116921455	-	-	-	-
Clpb	7:101663632-101790168	-	-	-	-
Wdr55	18:36760238-36766214	-	-	-	-
Ndufs5	4:123712709-123718202	-	-	up	-
Gins4	8:23226609-23237668	-	-	-	-
Doc2a	7:126847415-126865377	-	not expressed	not expressed	not expressed
Nktr	9:121719168-121759943	-	-	-	-
Gm21541	4:41893277-41943124	-	not expressed	-	-
Rps23-ps2	8:3567989-3584939	-	-	-	-
Prr7	13:55464266-55473155	-	not expressed	not expressed	-
Hmgb1-ps3	11:63846182-63846818	-	-	-	-
Pak6	2:118663302-118698020	-	not expressed	not expressed	not expressed
Rab5a	17:53479233-53539451	-	-	-	-
Msrb1	17:24736641-24742778	-	-	-	-
Gm14830	X:94774977-94775677	-	-	-	-
P2ry6	7:100937637-100964391	-	-	not expressed	-
Nrtn	17:56751324-56757530	-	-	-	not expressed
Ndst2	14:20723738-20730327	-	-	-	-
Dvl3	16:20511132-20532520	-	-	-	-
Rapgefl1	11:98836784-98853697	-	not expressed	not expressed	not expressed
Gm12338	11:75588096-75628804	-	-	-	-
Eif4g3	4:137993021-138208508	-	-	-	-
Cmc1	9:118040498-118150196	-	-	-	-
Rpl14	9:120571516-120574653	-	-	-	-
Coro2b	9:62419491-62537044	-	not expressed	-	-
Zic4	9:91358057-91389348	-	not expressed	not expressed	not expressed
Rabac1	7:24969749-24972728	-	-	-	-
Rpl7a-ps3	15:36308143-36308956	-	-	-	-
Sox5	6:143828424-144781977	-	-	not expressed	not expressed
Acp2	2:91202884-91236982	-	-	-	-
Dlg2	7:91090705-92447003	-	not expressed	not expressed	not expressed
Klc4	17:46442447-46831413	-	-	-	-
2210018M11Rik	7:98590614-98656569	-	-	-	-
Prkch	12:73584796-73778185	-	-	-	-
Kcnq5	1:21398402-21962530	-	not expressed	-	not expressed
Cacna1h	17:25369272-25433783	-	not expressed	-	not expressed
Ciz1	2:32308470-32381938	-	-	-	-
Cdh22	2:165111506-165234853	-	not expressed	not expressed	not expressed
Gm6910	13:66007671-66009240	-	-	-	-
Rpl13-ps3	14:58893505-58894129	-	-	-	-
Rxrg	1:167598383-167639623	-	-	-	-
Zdhhc18	4:133605298-133650154	-	-	-	-
Gm12312	11:70358137-70358781	-	-	-	-
Syne1	10:5336948-5550692	up	-	-	-
Mta1	12:113098277-113137206	-	-	-	-
Gm8707	9:41654302-41655282	-	not expressed	not expressed	not expressed
Syngap1	17:26941383-26972434	-	not expressed	not expressed	not expressed
Eif4ebp2	10:61432496-61452669	-	-	-	-
Nphp4	4:152390741-152563183	-	not expressed	not expressed	not expressed
Evc2	5:37338498-37425055	-	not expressed	-	-
Dtnb	12:3572380-3781796	-	-	not expressed	-
Nptx2	5:144545886-144557478	-	not expressed	not expressed	not expressed
Ncor1	11:62281472-62514417	-	-	-	-
Gm8824	16:50111072-50112062	-	-	-	-
Gpr4	7:19212537-19224176	-	not expressed	not expressed	-
Smpd3	8:106210935-106425889	-	not expressed	not expressed	-
Fosl2	5:32136471-32157831	-	-	-	-
Ostc	3:130695920-130709444	-	-	-	-
Olfm1	2:28192991-28230736	-	-	-	-
Zdhhc22	12:86983380-86988676	-	not expressed	not expressed	not expressed
Cyth2	7:45806636-45814581	-	-	-	-
Ccnd3	17:47505050-47611492	-	-	-	-
Baiap2	11:119942762-120006782	-	-	-	-
Rgs7	1:175059086-175492500	-	not expressed	not expressed	-
Gm10561	1:55170158-55235622	-	not expressed	not expressed	not expressed
Rasa2	9:96539299-96631617	-	not expressed	-	-
A230050P20Rik	9:20868641-20879727	-	-	-	-
Grik5	7:25009852-25072369	-	-	not expressed	-
Lta4h	10:93453395-93484896	-	-	-	-
Ppp1r12a	10:108162399-108277575	-	-	-	-
Gm21983,Mia,Rab4b	7:27168423-27181157	-	-	-	-
Pias3	3:96696383-96708560	-	-	-	-
Ccdc9	7:16274041-16286795	-	-	-	-
Idh3b	2:130274429-130284547	-	-	-	-
Tnfaip3	10:19000909-19015657	-	not expressed	-	-
Gm16049,Gm16052	17:13482552-13906150	-	not expressed	not expressed	not expressed
Gm13563	2:26381525-26389316	-	not expressed	not expressed	not expressed
Fam149b	14:20348161-20383489	-	-	-	-
Cmbl	15:31568790-31590119	-	-	-	-
Fam212b	3:105704598-105720842	-	not expressed	-	-
Gm5597	7:76244745-76245938	-	-	-	-
Gm12254	11:58508790-58509261	-	-	-	-
4931414P19Rik	14:54583662-54605908	-	-	-	-
Tmem44	16:30511854-30550842	-	not expressed	-	-
Igsf8	1:172261640-172319841	-	-	-	-
Diras2	13:52504374-52530836	-	not expressed	not expressed	not expressed
Atp13a4	16:29395852-29544864	-	not expressed	not expressed	not expressed
Slc1a6	10:78780495-78814825	-	not expressed	not expressed	not expressed
Gm10086	5:108517178-108517532	-	-	-	-
Slc6a13	6:121300226-121337733	-	-	-	-
Lzts3	2:130632838-130642803	-	-	-	-
Dpysl4	7:139086000-139102704	-	not expressed	not expressed	not expressed
Pram1,Zfp414	17:33629089-33645706	-	-	-	-
Plekha2	8:25025450-25102194	-	not expressed	-	-
Cmtm3	8:104340593-104347672	-	-	-	-
Gm14269	2:170463513-170463819	-	-	-	-
Pde2a	7:101421690-101512829	-	-	-	-
BC002163	16:42875880-43642602	-	-	-	-
Rasd2	8:75213943-75224113	-	not expressed	-	not expressed
Mtg2	2:180070587-180085902	-	-	-	-
Zfp3	11:70764208-70772928	-	-	-	-
Csnk1g2	10:80622779-80640771	-	-	-	-
Rps24-ps3	X:79195046-79195448	-	-	-	-
Lrrtm2	18:35118887-35254773	-	not expressed	not expressed	not expressed
Zfp768	7:127342796-127345314	-	-	-	-
Asun	6:146549631-146599198	-	-	-	-
Gm19807	17:37130908-37131575	-	-	-	-
Mlx	11:101087276-101095436	-	-	-	-
Cnot6l	5:96070332-96164171	-	-	-	-
Tle6	10:81590903-81601073	-	-	-	-
Zfp428	7:24507005-24515682	-	not expressed	-	-
Brf1	12:112959861-113001926	-	-	-	-
Polb	8:22628118-22653437	-	-	-	-
Rragd	4:32983036-33022180	-	not expressed	-	not expressed
Slc13a5	11:72241993-72268575	-	not expressed	not expressed	not expressed
Atp5l	9:44913249-44920742	-	-	-	-
Gm14438	2:175270555-175271179	-	-	-	-
Rasgef1c	11:49901834-49980994	up	not expressed	not expressed	not expressed
Nol4	18:22693180-23041653	-	not expressed	not expressed	not expressed
Cetn3	13:81778772-81797143	-	-	-	-
Tbkbp1	11:97136170-97151495	-	-	-	-
Rpl21-ps11	3:96666514-96666982	-	-	-	-
Chmp2a	7:13032005-13034777	-	-	-	-
Nkain1	4:130531601-130574173	-	not expressed	-	-
Fjx1	2:102449365-102452499	-	not expressed	not expressed	-
Uimc1	13:55027879-55100300	-	-	-	-
Klhl23	2:69821943-69836651	-	not expressed	-	not expressed
Mrps9	1:42851232-42905682	-	-	-	-
Ext2	2:93642383-93822568	-	-	-	-
Gm5457	14:12867552-12867888	-	-	-	-
Gm13039	4:143107390-143212995	-	-	-	-
Rpl10a	17:28328470-28331032	-	-	-	-
Fbxw5	2:25498650-25505471	-	-	-	-
Plekhf1	7:38220653-38227994	-	-	-	-
Tpm2	4:43514710-43523765	-	-	-	-
Fbxo6	4:148145715-148152140	-	-	-	-
Gadd45gip1	8:84831521-84840665	-	-	-	-
Nanos1	19:60755986-60759913	-	not expressed	not expressed	not expressed
Dact1	12:71309883-71321660	-	not expressed	not expressed	-
Mrto4	4:139347434-139352576	-	-	-	-
Gpr137	19:6938068-6951898	-	-	-	-
Rps8-ps2	2:175804982-175805606	-	-	-	-
Prmt5	14:54507186-54517525	-	-	-	-
Dhx34	7:16197146-16222037	-	-	-	-
Arap2	5:62602444-62766198	-	-	not expressed	-
Prex2	1:10993464-11303681	-	not expressed	not expressed	-
Gm12276	11:62281472-62514417	-	-	-	not expressed
Cdk5rap1	2:154335379-154373010	-	-	-	-
Cops3	11:59810079-59880968	-	-	-	-
Rmnd5b	11:51619734-51635896	-	-	-	-
Osgin2	4:15997120-16013888	-	-	-	-
Stub1	17:25794570-25985680	-	-	-	-
Nfu1	6:87009235-87028461	-	-	-	-
Gm27718,Gm27913,Gm27957,Pvt1	15:62037985-62378096	-	not expressed	-	-
Cdk10	8:119910359-124345724	-	-	-	-
Sidt1	16:44240179-44333196	-	not expressed	not expressed	not expressed
Ankrd33b	15:31291478-31367759	-	-	-	not expressed
RP23-241H7.1	3:59431536-59433348	-	-	-	-
Rps19-ps4	18:42202349-42262122	-	-	-	-
Fcgr3	1:171051173-171064935	-	-	-	-
Cxxc1	18:74216130-74221491	-	-	-	-
Kcnj12	11:61022563-61071131	-	not expressed	-	not expressed
Eng	2:32646594-32704145	-	-	-	-
Lin7a	10:107271842-107425143	-	-	not expressed	not expressed
Hcn1	13:117602479-117976802	-	not expressed	not expressed	not expressed
Kcna4	2:107290638-107298502	-	not expressed	not expressed	not expressed
Gm10171	1:172144273-172144901	-	-	-	-
Dnajc17	2:119172499-119217049	not expressed	-	-	-
Dhx38	8:109548016-109565601	-	-	-	-
Cacnb3	15:98632219-98644530	-	not expressed	not expressed	-
Atp5g2	15:102662863-102672352	-	-	-	-
Arhgef9	X:95048934-95196821	-	not expressed	-	-
Gm27733,Gm27927,Xist	X:103414466-103484957	-	-	-	-
Tmem205	9:21921009-21935872	-	-	-	-
Dlgap4	2:156613704-156764363	-	-	-	-
Gnai2	9:107614124-107635367	-	-	-	-
Adamts3	5:89673840-89883334	-	not expressed	not expressed	not expressed
Gm2962	1:170917575-170927583	-	-	-	-
Ndufa1	X:37187587-37191163	-	-	-	-
Nol8	13:49653349-49679015	-	-	-	-
1700028K03Rik,A830010M20Rik	5:107497377-107688015	-	not expressed	-	-
Nup153	13:46679904-46727940	-	-	-	-
Hrasls	16:29209694-29230531	-	not expressed	-	not expressed
Slc35b1	11:95384691-95391776	-	-	-	-
Ddx59	1:136411915-136440158	-	-	-	-
Rock2	12:16894977-16988274	-	-	-	-
Cep170b	12:112722173-112746591	-	-	-	-
Rpl38-ps1	4:138425787-138426002	-	-	-	-
Zc3h3	15:75754431-75841915	-	-	-	-
Trim47,Trim65	11:116105751-116131128	-	-	-	-
Pgm2l1	7:100227393-100278868	-	not expressed	-	-
4930555K19Rik	15:41173700-41173871	-	not expressed	not expressed	not expressed
Gm14111	2:146754706-146755705	-	-	-	-
Zswim6	13:107724617-107890064	-	not expressed	not expressed	not expressed
Gm20900	13:120304193-120304655	-	-	-	-
Capn3,Ganc	2:120355311-120504913	-	-	-	-
Sumo2	11:115523101-115536276	-	-	-	-
Gm27004	5:112582644-112589996	-	not expressed	not expressed	not expressed
Mta3	17:83706162-83821516	-	-	-	-
Mical2	7:112225855-112355194	-	-	-	-
Prpsap2	11:61729649-61762088	-	-	-	-
B2m	2:122120107-122186189	-	-	-	-
Hnrnpab	11:51584756-51606847	-	-	-	-
Gng7	10:80948623-81014945	-	not expressed	-	-
Gm11273	13:21500952-21501430	-	-	-	-
Gp1bb,Sept5	16:18620318-18629938	-	not expressed	-	-
Zfp961	8:71951037-72009626	-	-	-	-
Ptpn12	5:20986644-21055911	-	-	-	-
Trap1	16:4032838-4077827	-	-	-	-
Ppp1r2-ps6	17:6253902-6254523	-	-	-	-
Tor1a	2:30960626-30967933	-	-	-	-
Snrnp40	4:130360131-130390026	-	-	-	-
Thoc6	17:23668613-23675227	-	-	-	-
Trmt5	12:73280409-73286711	-	-	-	-
Exosc8	3:54692822-54735393	-	-	-	-
Thoc5	11:4895319-4928867	-	-	-	-
Tmem181b-ps	17:6310546-6493180	-	not expressed	-	-
Ppp1r2-ps2	6:90905818-90906453	-	-	-	-
Cd320	17:33843090-33849774	-	-	-	-
Rpl12	2:32876113-32965345	-	-	-	-
Pcbp3	10:76761856-76961887	-	-	-	-
Gm9144	12:7859826-7861205	-	-	-	-
Ncln	10:81486248-81496392	-	-	-	-
Prdm10	9:31280537-31378543	-	not expressed	not expressed	not expressed
Kcnq4	4:120696137-120748612	-	not expressed	-	-
Bean1	8:104170512-104219092	-	not expressed	not expressed	not expressed
Agpat3	10:78269177-78352489	-	-	-	-
Phf20l1	15:66577571-66645255	-	-	-	-
Gm8666	X:75459962-75485753	-	-	-	-
Tasp1	2:139833479-140066805	-	-	-	-
Zfp791	8:85109646-85119637	-	not expressed	not expressed	not expressed
Suz12	11:79993105-80034123	-	-	-	-
Ephx2	14:66084376-66124500	-	-	-	-
Gpr137b-ps	13:12619083-12650297	-	not expressed	not expressed	-
Mamdc4,Phpt1	2:25563114-25575224	-	-	-	-
Kptn	7:16119894-16127516	-	-	-	-
Spaca6	17:17830718-17843009	-	-	-	-
Cdc42ep3	17:79334024-79358022	-	not expressed	-	-
Drc1	5:30281387-30366708	-	not expressed	not expressed	not expressed
Slc39a10	1:46807543-46892852	-	not expressed	not expressed	-
Gm3362	15:37923951-37961318	-	-	-	-
Mast2	4:116306761-116464183	-	-	-	-
Cfp	X:20925453-20931555	-	-	-	-
Gm13935	2:110418169-110419619	not expressed	-	-	-
Pdia3	2:121392630-121438687	-	-	-	-
Slc29a3	10:60712071-60752794	-	-	-	-
Tomm7	5:23838943-23844161	-	-	-	-
Slc6a8	X:73673149-73682502	-	-	-	-
Gpatch3	4:133574744-133584243	-	-	-	-
Slc38a3	9:107650633-107669530	-	-	-	-
Gm14127	2:150469410-150470165	-	-	-	-
Oard1	17:48410013-48417266	-	-	-	-
Cacng8	7:3390682-3415648	-	not expressed	not expressed	not expressed
Xrcc6bp1	10:126868429-126901371	-	-	not expressed	-
5730508B09Rik	3:127869687-127896323	-	-	-	-
Prpf6	2:181569148-181655660	-	-	-	-
Ecsit	9:22055459-22086122	-	-	-	-
Grasp	15:101224206-101232755	-	not expressed	-	-
Plp2	X:7657259-7671390	-	-	-	-
Rpl5-ps2	2:154703808-154704699	-	-	-	-
Gm7008	12:40201566-40248504	-	not expressed	-	not expressed
Gm11224	4:69954165-69955276	-	-	-	-
Spns1	7:126370059-126377450	-	-	-	-
Sprn	7:140137563-140154877	-	not expressed	not expressed	not expressed
M5C1000I18Rik	9:67758711-67760930	-	not expressed	not expressed	not expressed
Apoe	7:19696108-19699166	-	-	up	-
Gm11696	11:109346838-109401369	-	not expressed	not expressed	not expressed
Scx	15:76380260-76477269	-	not expressed	-	not expressed
Phf21a	2:92043372-92364666	-	-	-	-
Bag6	17:35135177-35147322	-	-	-	-
Armc2	10:41914989-42018442	-	not expressed	not expressed	not expressed
Phf12	11:77982753-78037866	-	-	-	-
Ggt5	10:75589339-75617200	-	-	-	-
Scarb1	5:125277086-125341094	-	-	-	-
Celf4	18:25477631-25753983	-	not expressed	not expressed	not expressed
Ctsk	3:95499285-95509362	-	not expressed	-	-
Gltscr2	7:15937837-15946108	-	-	-	-
Porcn	X:8193847-8206525	-	-	-	-
Abi3	11:95700105-95845734	-	-	-	-
Gm14290	2:167098793-167101826	-	not expressed	-	-
P2ry13	3:59006977-59351167	-	-	not expressed	not expressed
Rgs20	1:4909575-5162529	-	not expressed	not expressed	not expressed
0610009B22Rik	11:51685385-51688874	-	-	-	-
Srcin1	11:97509339-97576186	-	not expressed	not expressed	not expressed
Kctd16	18:40258360-40531168	-	not expressed	not expressed	not expressed
Adora2a	10:75316942-75334788	-	-	not expressed	-
Gm7030	17:36109233-36129692	-	-	-	-
Arpp21	9:112065090-112348925	-	not expressed	down	not expressed
Slc25a32	15:39094190-39112716	-	-	-	-
Epha4	1:77367184-77515088	-	not expressed	not expressed	not expressed
Ccdc62,Denr	5:123907174-123969895	-	-	-	-
Naa50	16:44139829-44163366	-	-	-	-
Slc17a7	7:45163920-45176138	-	not expressed	not expressed	-
Tmem259	10:79970714-79984330	-	-	-	-
Myadm	7:3289037-3299345	-	-	-	-
Kpna3	14:61365185-61439947	-	-	-	-
Kiz	2:146855863-146970097	-	-	-	-
Nab2	10:127642985-127701049	-	-	-	-
Purg	8:33386324-33417468	-	not expressed	-	-
1700037C18Rik	16:3847267-3941147	-	not expressed	-	-
Osbp2	11:3703730-3863903	-	not expressed	not expressed	-
Gm15946	17:12962767-12963190	-	-	-	-
Egln3	12:54178980-54203860	-	-	down	up
Scube1	15:83602582-83725021	-	not expressed	not expressed	not expressed
Bdp1	13:100017993-100104070	-	-	-	-
Mvp,Pagr1a,Pagr1b,Prrt2	7:126986859-127021211	-	-	-	-
Fbrs	7:127485220-127491513	-	-	-	-
Elmsan1	12:84149175-84218881	-	down	-	-
Gm2308	7:42116470-42195776	-	-	-	-
Rnf169	7:99920256-99980458	-	-	-	-
Egr3	14:70077444-70080157	-	not expressed	not expressed	not expressed
Tmem59l	8:70483875-70487358	-	not expressed	not expressed	not expressed
Katnb1	8:95081200-95142540	-	not expressed	-	-
Rpl31	1:39367841-39478755	-	-	-	-
Dclk3	9:111439080-111489608	-	-	not expressed	-
Syt5	7:4539767-4546567	-	not expressed	not expressed	not expressed
Caskin1	17:24488782-24534210	-	not expressed	not expressed	not expressed
RP23-399N18.1	1:191001424-191001851	-	not expressed	not expressed	not expressed
Gm21992,Rbm14,Rbm4	19:4711207-4811634	-	-	-	-
Dph6	2:114516415-114697839	-	-	-	-
Stx1b	7:127803899-127849019	-	-	-	-
Rpap3	15:97675104-97705822	-	-	-	-
Tshz3	7:36698117-36773553	-	not expressed	not expressed	not expressed
Rpp38	2:3328948-3332643	-	-	-	-
Basp1	15:25363284-25413764	-	-	not expressed	-
Tbc1d8	1:39367841-39478755	-	-	-	-
Gm24924	18:14624197-14682914	not expressed	not expressed	not expressed	not expressed
R3hdm1	1:128103300-128237736	-	-	-	-
Kcns1	2:164163618-164171113	-	not expressed	not expressed	not expressed
Wash	17:66111545-66120503	-	-	-	-
Car4	11:84957785-84966044	-	not expressed	down	-
Gm14414	2:177460274-177460847	-	-	-	-
S100a13	3:90514434-90524581	-	-	-	-
Cystm1	18:36345618-36402980	-	-	-	-
Malat1	19:5795689-5802672	-	-	-	-
Zcchc11	4:108459425-108559421	-	-	-	-
Zfp335	2:164879303-164919953	-	-	-	-
Gm12428	3:98821037-98821764	-	-	-	-
Myo16	8:10272571-10634741	-	not expressed	not expressed	not expressed
Cherp	8:72443879-72475233	-	-	-	-
Gm8399	13:80957664-81633154	-	down	-	-
Nipsnap3b	4:53011879-53022060	-	-	-	-
Utp3	5:88554482-88556083	-	-	-	-
Supv3l1	10:62429208-62451322	-	-	-	-
Dtx3	10:127190377-127211622	-	-	-	-
Clcn2	16:20693281-20722267	-	-	not expressed	-
3110057O12Rik	3:40846969-40938138	-	-	-	-
Gm336	19:11090597-11092077	-	not expressed	not expressed	not expressed
Prkaa2	4:105029873-105109890	-	-	-	not expressed
Fam160a2	7:105371210-105400054	-	-	-	-
Pmepa1	2:173224457-173276533	-	-	down	-
Gm10132	14:77156762-77721760	-	-	-	-
Aptx	4:40682381-40703194	-	-	-	-
Plekho1	3:95988428-95996001	-	-	-	-
Kxd1,Uba52	8:70508262-70535328	-	-	-	-
Gm11518	11:93996090-94126085	-	-	-	-
Wdfy1	1:79702261-79781445	-	-	-	-
Prdx6	1:161240111-161251219	-	-	-	-
Cdkl3	11:51949881-52286179	-	not expressed	-	-
Gm10260	13:97751111-97760965	-	-	-	-
Gm10243	6:48523517-48523850	-	-	-	-
9030617O03Rik	12:100779056-100908198	-	-	-	-
Ldb1	19:46032592-46072915	-	-	-	-
Mal2	15:54571365-54602846	-	-	not expressed	-
Zcchc17	4:130308161-130359943	-	-	-	-
Mrpl14	17:45660170-45698495	-	-	-	-
Yam1	17:39846957-39848829	-	-	-	up
Ptprd	4:75941237-78214177	-	-	-	-
Caln1	5:130369475-130840645	-	-	not expressed	not expressed
Prkcg	7:3303531-3331094	-	not expressed	not expressed	not expressed
Gm4875	6:117997206-117997992	-	-	-	-
Klf4	4:55527142-55532466	-	not expressed	-	-
Rpl14-ps1	7:45303154-45333780	-	-	-	-
Gm15784	6:149361685-149363147	-	-	-	-
Ascl1	10:87490818-87493660	-	not expressed	not expressed	not expressed
Cdc25b	2:131146323-131198497	-	not expressed	-	-
Sema6c	3:95160456-95174024	-	not expressed	-	-
Gm9061	16:64911272-64912278	-	-	-	-
Dmxl1	18:49832669-49965473	-	not expressed	-	-
Letm2	8:25578491-25597989	-	-	-	-
Coch	12:51593340-51605773	-	not expressed	not expressed	not expressed
Gpr150	13:76054850-76056996	-	not expressed	not expressed	not expressed
Znrd1	17:36954355-36958559	-	-	-	-
Gm4342	8:119910359-124345724	-	-	-	-
Unc79	12:102948858-103184065	-	not expressed	not expressed	not expressed
Dscaml1	9:45416625-45753164	-	not expressed	not expressed	not expressed
Lysmd3	13:81657805-81671888	-	-	-	-
Plekhg5	4:152072497-152115400	-	-	-	-
Mrpl15	1:4773205-4785739	-	-	-	-
Rps15	10:80292452-80294114	-	up	-	-
Gm9396	3:130068411-130068978	-	-	-	-
Gm16581	1:55127296-55128287	-	-	-	-
Speg	1:75375296-75432320	-	not expressed	-	-
Snrnp27	6:86675220-86684522	-	-	-	-
Ttc17	2:94300766-94438136	-	-	-	-
Rheb	5:24802822-24842624	-	-	-	-
Satb1	17:51736186-51834723	-	not expressed	-	-
Pde1a	2:79834452-80129458	-	-	not expressed	-
Atrip,Trex1	9:109057932-109074124	-	-	-	-
Dcaf10	4:45316612-45379759	-	-	-	-
Rpl21-ps10	3:38107439-38107922	-	-	-	-
Ablim2	5:35757879-35884973	-	-	-	-
Eif5a	11:69916713-69921958	-	-	-	-
RP23-349K2.1	3:33621607-33622403	-	-	-	-
2610002M06Rik	X:107782750-107872909	-	-	-	-
1500012F01Rik	2:167035792-167065862	-	-	-	-
Wdr89	12:75630289-75669537	-	-	-	-
Aldh1l1	6:90486426-90600203	-	-	-	-
Cops6	5:138161070-138187451	-	-	-	-
Ankhd1,Eif4ebp3	18:36559986-36665917	-	-	-	-
Cux1	5:136248134-136567490	-	-	-	-
Psmb10	8:105934332-105966115	-	-	-	-
Mpped1	15:83779466-83858494	-	not expressed	not expressed	not expressed
Lonp2	8:86624042-86723873	-	-	-	-
Fam117a	11:95336010-95384507	-	not expressed	-	-
St6galnac6	2:32599708-32620806	-	-	-	-
Mvd	8:119910359-124345724	-	-	-	-
Ccdc167	17:29549787-29717012	-	-	-	-
Syt3	7:44360042-44400187	-	-	-	-
Bak1	17:26973166-27036378	-	-	-	-
Srrm2	17:23790531-23829109	-	-	-	-
Csad	15:102176997-102189043	-	-	-	-
Efs	14:54916542-54926788	-	not expressed	not expressed	-
Irf2bp1	7:19004064-19006761	-	-	-	-
Fcho1	8:71708386-71725716	-	not expressed	not expressed	not expressed
Gria2	3:80681449-80802835	-	not expressed	not expressed	not expressed
Pacsin3	2:91250742-91264679	-	-	-	-
Psmc4	7:28041706-28050101	-	-	-	-
Vps72	3:95111021-95123051	-	-	-	-
Gm9320,RP23-85E24.2	17:70853766-71475343	-	-	-	-
Erbb4	1:68032185-69108059	-	not expressed	not expressed	not expressed
Tiam1	16:89787110-89980080	-	not expressed	-	-
Dclk1	3:55242525-55539064	-	not expressed	not expressed	-
Prkca	11:107933386-108414396	-	-	-	-
Ago3	4:126331703-126429556	-	-	not expressed	not expressed
Apool	X:112311333-112372755	not expressed	-	-	-
Slc12a4	8:105934332-105966115	-	-	-	-
Pde7a	3:19223107-19311322	-	-	-	-
Med7	11:46436924-46447248	-	-	-	-
Mettl15	2:109092296-109341747	-	-	-	-
Ccdc94	17:55952622-55967949	-	-	-	-
Egfl8,Ppt2	17:34604261-34628510	-	-	-	-
Ndnf	6:65671589-65706930	-	not expressed	not expressed	not expressed
Arl6ip4	5:124116088-124118196	-	-	-	-
Bri3	5:144241689-144446757	-	-	-	-
Tnni1	1:135779433-135810989	-	not expressed	-	not expressed
Mcph1	8:18595130-18803189	-	not expressed	-	-
Klf10	15:38294412-38300707	-	-	-	-
Cox4i1	8:119910359-124345724	-	-	-	-
Gm12525	3:108361550-108362256	-	not expressed	not expressed	not expressed
Tufm	7:126487354-126490730	-	-	-	-
Gdap1l1	2:163438475-163455324	-	not expressed	not expressed	not expressed
Fam26e	10:34037596-34109813	-	not expressed	not expressed	-
Izumo1,Rasip1	7:45621810-45639093	-	-	-	-
Wwox	8:114439654-115352708	-	-	-	-
Zfand5	19:21272277-21282289	-	-	-	-
Rnf220	4:117271462-117500602	-	-	-	-
Ddx28	8:105984943-106053840	-	-	-	-
Dlgap2	8:14095864-14847680	-	not expressed	not expressed	not expressed
Cyyr1	16:85421532-85553943	-	-	-	-
Psmg1	16:95979932-95990960	-	-	-	-
Gng4	13:13784058-13827897	-	not expressed	not expressed	not expressed
Zfp563	17:33089309-33106203	-	not expressed	-	-
Hps3	3:19957053-20035315	-	-	-	-
Lhx2	2:38339280-38369733	-	-	not expressed	not expressed
Nudt22	19:6993017-6996117	-	-	-	-
Manea	4:26324505-26346891	-	-	-	-
Garnl3	2:32986223-33131654	-	not expressed	not expressed	-
Tenm2	11:36006655-37235964	-	not expressed	not expressed	not expressed
Ccdc34	2:110017816-110173360	-	-	-	-
Otx2	14:48657678-48667644	-	not expressed	not expressed	not expressed
Gm14251	2:156311846-156375638	-	-	-	-
Rps27a-ps2	9:83390292-83454573	-	-	-	-
Srbd1	17:85984664-86145175	-	-	not expressed	-
Gm3436	9:70798128-70934808	-	-	-	-
Sstr2	11:113244852-113684155	-	not expressed	not expressed	not expressed
Snrpb2	2:143063038-143072853	-	-	-	-
Dok3	13:55523234-55528538	-	-	not expressed	-
Nckap5l	15:99422034-99457748	-	not expressed	not expressed	-
Cep83	10:94688789-94790336	-	-	-	-
Med29	7:28386145-28392708	-	-	-	-
Ttbk1	17:46442447-46831413	-	not expressed	not expressed	not expressed
Neto1	18:86394951-86501897	-	not expressed	not expressed	not expressed
Ecm1	3:95734146-95739569	-	-	-	-
Gm6478	13:62035419-62036163	-	not expressed	-	-
Lynx1	15:74747851-74753046	-	not expressed	-	-
Adrm1	2:180171484-180176286	-	-	-	-
Rpl17-ps9	7:36118273-36118828	-	-	-	-
Slc2a6	2:27021362-27027998	-	not expressed	not expressed	not expressed
Dcakd	11:102838472-103101658	-	-	-	-
Clptm1	7:19631580-19665030	-	-	-	-
Klhl15	X:94234598-94277724	-	not expressed	not expressed	not expressed
Rpl27-ps3	18:6332589-6333064	-	-	-	-
Mpp2	11:102057014-102088515	-	not expressed	not expressed	-
Usp39	6:72318677-72345184	-	-	-	-
Gm9892	8:52196064-52197056	-	-	-	-
Nipbl	15:8291224-8444463	-	-	down	-
Fxyd7	7:31042516-31051462	-	not expressed	-	not expressed
Rps15-ps2	6:58017505-58017943	-	-	-	-
Far1	7:113513833-113571511	-	not expressed	-	-
Mgat5b	11:116918862-116986948	-	not expressed	not expressed	not expressed
Kcnj4	15:79483717-79505241	-	not expressed	not expressed	not expressed
Prrt1	17:34629532-34633126	-	not expressed	not expressed	-
Zmiz1	14:25455736-25666743	-	-	-	-
Fam173a	17:25786579-25792284	-	-	-	-
Fzr1	10:81357490-81378516	-	-	-	-
Rph3a	5:120940501-121009518	-	not expressed	not expressed	not expressed
Zfp366	13:99184822-99247037	-	not expressed	-	-
Pias2	18:77065207-77155708	-	-	-	-
Gm13690	2:80617044-80658906	-	-	-	-
Rtn2	7:19282661-19296164	-	not expressed	-	-
Prps1	X:140456612-140476140	-	-	-	-
Gm13142	4:146153455-147492201	-	-	-	-
Myt1l	12:29528383-29923209	-	not expressed	not expressed	not expressed
Cs	10:128337831-128362479	-	-	-	-
Clpx	9:65294259-65330658	-	-	-	-
Kcnk2	1:189207929-189402273	-	not expressed	not expressed	-
Oaz1	10:80826655-80829290	-	-	-	-
Gm27366,Gm27419,Gm27544,Gm27582,Gm27608,Gm27621,Gm27753,Gm27999,Rmst	10:92071036-92165170	-	not expressed	-	not expressed
1700030K09Rik	8:72443879-72475233	-	-	-	-
Ube2m	7:13035119-13038275	-	-	-	-
Nsdhl	X:72918556-72958514	-	up	-	-
Ddx24	12:103407975-103425867	-	-	-	-
Gm26920,Zfp566,Zfp82	7:30054488-30090527	-	not expressed	-	-
Gm11249	4:67930880-67931739	-	-	up	up
Psma1	7:114264605-114276118	-	-	-	-
Apitd1	4:149127120-149137629	-	not expressed	not expressed	not expressed
Wnk2	13:49036302-49148014	-	not expressed	-	not expressed
Zfp943	17:21962551-22071168	-	-	-	-
Camk1g	1:193346345-193370298	-	not expressed	not expressed	not expressed
Kcnj6	16:94749265-94997696	-	not expressed	not expressed	not expressed
Tsg101	7:46888948-46919969	-	-	-	-
Gbas	5:129725062-129758327	-	-	-	-
Cdipt	7:126976348-126980499	-	-	-	-
Gm14491	X:11913090-11913289	-	-	-	-
Klf9	19:23141225-23166911	-	-	-	-
Rps6-ps3	9:53684109-53706232	-	-	-	-
Timm50	7:28305515-28312072	-	-	-	-
Robo2	16:73892305-74411825	-	not expressed	not expressed	not expressed
Tctn3	19:40596445-40612233	-	not expressed	-	-
Tshz1	18:84011626-84086404	-	-	-	-
Gtdc1	2:44564411-44927657	-	-	-	-
Smt3h2-ps4	1:14839868-14840156	-	-	-	-
Zyx	6:42349827-42381215	-	-	-	-
Gm28049	14:69337173-69523605	-	-	-	-
Rae1	2:173000116-173015739	-	-	-	-
Gm12366	4:35191284-35262222	-	-	-	-
Tmem200c	17:68837135-68843138	-	not expressed	not expressed	not expressed
A430033K04Rik	5:138622858-138648903	-	-	-	-
Pmpcb	5:21737140-21757152	-	-	-	-
Rpl28-ps1	1:127954183-128103047	-	-	-	-
Dyrk3	1:131127454-131138340	-	not expressed	not expressed	not expressed
Tanc2	11:105589985-105929304	-	not expressed	not expressed	-
Coq6	12:84345308-84373796	-	-	-	-
Gtf2a2	9:70012549-70022866	-	-	-	-
Actr8	14:29978336-29993221	-	-	-	-
Lyl1	8:84699875-84800344	-	not expressed	-	-
Gm13080	4:143611657-143612077	-	-	-	-
Asap1	15:64086856-64382919	-	-	-	-
Il1rapl1	X:86740869-88115645	-	not expressed	not expressed	not expressed
Pam16	16:4594712-4624988	-	-	-	-
Gm12291	11:64759716-64760027	-	-	-	-
Higd2a	13:54590206-54591158	-	-	-	-
Tle2	10:81572611-81590845	-	-	-	-
Slc4a10	2:62046461-62326730	-	not expressed	not expressed	not expressed
Cops4	5:100518308-100547803	-	-	-	-
Nhsl2	X:101849384-102092055	-	not expressed	not expressed	-
Lmtk3	7:45783737-45804144	-	not expressed	not expressed	not expressed
Rilpl1	5:124493081-124531391	-	-	-	-
Bzw2	12:36091845-36156825	-	-	-	-
Grm4	17:27422386-27513341	-	not expressed	not expressed	not expressed
Rrbp1	2:143947394-144011263	-	-	-	-
Uaca	9:60794547-60880370	-	-	-	-
Gtf2h4	17:35667729-35673739	-	-	-	-
Lppr1	4:49059272-49340259	-	not expressed	not expressed	not expressed
Kcnma1	14:23289430-24004859	-	not expressed	-	not expressed
C1galt1	6:7844841-7872047	-	-	-	-
Gm16379	9:14845364-14847835	-	up	-	-
Vcan	13:89655311-90143907	-	not expressed	not expressed	-
Prickle1	15:93499113-93595891	-	-	-	-
Tab3	X:85574021-85634469	-	not expressed	-	-
C330006A16Rik	2:26136813-26140521	-	-	-	-
Cox7c	13:86044815-86046904	-	-	-	-
Ndufa9	6:126821862-126849144	-	-	-	-
Snrpa	7:27187004-27205386	-	-	-	-
Gm5873	6:6735426-6736492	-	up	-	up
Bcr	10:75060895-75184923	-	-	not expressed	-
Nfic	10:81396185-81431005	-	-	-	-
Vps37b	5:124003590-124032260	-	-	-	-
3830406C13Rik	14:12284208-12303231	-	-	-	-
Gnb2l1	11:48800331-48817353	-	-	-	-
Ydjc	16:17139063-17202649	-	not expressed	not expressed	-
Sh3yl1	12:30911667-30960162	-	-	not expressed	-
Gm5459	14:31019137-31128930	-	-	-	-
C230037L18Rik	15:89472475-89484847	-	not expressed	not expressed	not expressed
Lrch2	X:147470374-147554081	-	not expressed	not expressed	not expressed
Rnf40	7:127588697-127603605	-	-	-	-
Chac2	11:30954394-31102704	-	-	-	-
Mtmr1	X:71364759-71419196	-	-	-	-
2900011O08Rik	16:13981701-14101500	-	not expressed	not expressed	not expressed
Ndufa6	15:82350138-82354291	-	-	-	-
Map1a	2:121289599-121355396	-	not expressed	-	-
Galnt9	5:110544344-110621382	-	not expressed	not expressed	not expressed
Ranbp2	10:58446851-58494155	-	-	-	-
C230004F18Rik	X:61116385-61175991	-	not expressed	not expressed	not expressed
2700062C07Rik	18:24470860-24477765	-	-	-	-
Rer1	4:155074109-155086382	-	-	-	-
S1pr1	3:115710432-115715055	-	-	-	-
Ppp1r3g	13:35958838-35970388	-	-	not expressed	not expressed
Eri2	7:119760922-119848943	-	-	not expressed	-
Uhrf1bp1l	10:89744990-89819869	-	-	down	-
Tcf19	17:35512733-35516824	-	-	not expressed	-
6430573F11Rik	8:36457547-36514320	-	-	not expressed	-
Ipo13	4:117894485-117914999	-	-	-	-
Gm11400	11:3131849-3266415	-	-	-	-
Rps15a-ps7	2:152185290-152185682	-	up	-	-
Rgs4	1:169741476-169747642	-	not expressed	-	-
Osbpl8	10:111164801-111297247	-	-	-	-
Pip5k1c	10:81292962-81319973	-	-	-	-
Cox6a1	5:115345641-115348981	-	-	-	-
Clta	4:44004451-44032846	-	-	-	-
Spata7	12:98628156-98669815	-	not expressed	-	not expressed
Zfp938	10:82224849-82241280	-	not expressed	-	-
Atrnl1	19:57611033-58133338	-	-	-	-
Atcay	10:81194608-81230833	-	not expressed	not expressed	not expressed
Ube2a	X:36874357-36884215	-	-	-	-
Dis3l	9:64306755-64341288	-	-	-	-
Eef1a2	2:181147652-181157014	-	not expressed	-	-
Babam1	8:71396854-71404772	-	-	-	-
Cbll1	12:31484828-31499616	-	-	-	-
Kcnd1	X:7822288-7838280	-	not expressed	not expressed	not expressed
Sgtb	13:104109740-104141735	-	not expressed	not expressed	-
Reep2	18:34840588-34847463	-	not expressed	not expressed	-
BC052040	2:115581715-115778768	-	-	-	not expressed
Slc35f4	14:49298518-49526046	-	not expressed	not expressed	not expressed
Ppp2r5b	19:6226379-6235872	-	-	-	-
Pde1b	15:103503297-103530052	-	not expressed	not expressed	-
Xab2	8:3587449-3621316	-	-	-	-
2017-03-11	15:26309047-26409576	-	not expressed	not expressed	not expressed
Acer3	7:98213657-98321208	-	-	not expressed	not expressed
Atp1a2	1:172261640-172319841	-	not expressed	-	-
Acvrl1	15:101128521-101145336	-	not expressed	-	-
Cacna1e	1:154390730-154884501	-	not expressed	not expressed	not expressed
Amy1,Rnpc3	3:113555709-113630149	-	-	-	-
Lyn	4:3678114-3813122	-	-	-	-
Plagl2	2:153227758-153241426	-	-	-	-
Cope	8:70302517-70312993	-	-	-	-
Pacrg	17:10403011-10840311	-	not expressed	-	not expressed
Dctn3	4:41699988-41774247	-	-	-	-
Fnbp1l	3:122538718-122619667	-	-	not expressed	-
Cspp1	1:10024600-10136768	-	-	-	-
Cabp1	5:115168688-115194381	-	not expressed	not expressed	not expressed
Entpd6	2:150748280-150771675	-	-	-	-
Pms1	1:53189186-53297018	-	not expressed	-	not expressed
Vwa3a	7:120739556-120805742	-	not expressed	not expressed	-
Ndufb3	1:58586383-58595964	-	-	-	-
Akirin2	4:34550936-34566908	-	-	-	-
Gm13320	2:14174522-14221993	not expressed	-	-	-
Hist1h4d	13:23581597-23581990	-	-	-	not expressed
Lypla2	4:135968223-135972626	-	-	-	-
Zfp644	5:106500893-106697287	-	-	-	-
Ccdc74a	16:17646469-17650738	-	not expressed	not expressed	not expressed
Zfp865	7:5020375-5033138	-	-	-	-
Mab21l2	3:86224679-86782692	not expressed	not expressed	not expressed	not expressed
Klf12	14:99874485-100149764	-	-	not expressed	not expressed
Pnrc1	4:33245422-33290163	-	-	-	-
Rps24	14:24490680-24496146	-	up	-	-
Cpsf3	12:21286296-21315056	-	up	-	-
Rpl31-ps8	15:90764278-90764656	-	-	up	-
Lamtor4	5:138255607-138259398	-	-	-	-
Gm11974,Gm22457	11:6525590-6528760	-	-	-	not expressed
Polr1c	17:46243919-46248054	-	-	-	-
Tox	4:6686352-6991557	-	-	not expressed	not expressed
Epc2	2:49451485-49551948	-	-	-	-
Rps3a3	13:108449947-109953461	-	-	-	-
Baalc	15:38726868-39006185	-	not expressed	not expressed	not expressed
Gm14231	2:156789811-156790403	-	-	-	-
Kcnn1	8:70842048-70857008	-	-	-	-
Aes	10:81559493-81566362	-	-	up	-
Uggt2	14:118985038-119115074	-	not expressed	-	-
Vcp	4:42969603-43000507	-	-	-	-
Hmgxb3	18:61105571-61177050	-	-	-	-
Shfm1	6:6557293-6578658	-	up	-	-
Mchr1	15:81235498-81238963	-	not expressed	not expressed	not expressed
Tspan13	12:36014556-36042500	-	not expressed	up	-
Gm15867	1:192844487-192856246	-	not expressed	-	-
Map9	3:82358043-82395268	-	not expressed	not expressed	-
Incenp	19:9872296-9899533	-	not expressed	not expressed	not expressed
Ica1	6:8630526-8778488	-	not expressed	not expressed	-
Uqcr10	11:4701972-4704342	-	-	-	-
Tiam2	17:3326572-3557713	-	-	not expressed	not expressed
Ppp1r14a	7:29289319-29293390	-	-	not expressed	-
Pltp	2:164830731-164857711	-	-	-	-
Gm21093	4:42033016-42039512	-	not expressed	not expressed	not expressed
Ackr1,Cadm3	1:173331885-173466040	-	-	-	-
Gm4596	3:116513069-116549976	-	-	-	-
Fkbp1b	12:4833174-4841595	-	not expressed	not expressed	-
C1qc	4:136889803-136893065	-	-	-	-
Gm19412	17:33915898-33929288	-	not expressed	not expressed	-
Xkr4	1:3205900-3671498	-	not expressed	not expressed	not expressed
Nabp2	10:128377114-128411492	-	-	-	-
Atp6v1h	1:4909575-5162529	-	-	-	-
Rfx7	9:72532239-72622937	-	-	-	-
Zfp467	6:48427696-48445825	-	-	-	-
Rpl23a-ps3	14:34170654-34171168	-	-	-	-
Smarcd1	15:99702175-99713995	-	-	-	-
Lrrk1	7:66226911-66388350	-	-	-	-
Mdn1	4:32657118-32775217	-	-	-	-
Chil1	1:134182175-134190181	-	-	not expressed	not expressed
Mcts1	X:38600577-38613426	-	-	-	-
Gad1	2:70489939-70602014	-	not expressed	not expressed	not expressed
Tnrc6c	11:117654288-117763439	-	-	-	-
Alad	4:62509168-62519918	-	-	-	-
Mrpl38	11:116131816-116138868	-	-	-	-
Slc46a1	11:78465696-78472059	-	-	not expressed	-
N6amt2	14:57549597-57571569	-	-	-	-
Alg12	15:88805243-88819318	-	-	-	-
Cyp4f14	17:32905070-32917342	-	-	not expressed	not expressed
Gmppb	9:108049241-108085003	-	-	-	-
Rab40b	11:121356124-121388251	-	not expressed	-	-
Rpl41	10:128548113-128549305	-	-	-	-
Arpc5l	2:39008075-39015877	-	-	-	-
Larp1b	3:40950630-41040234	-	-	-	-
Pex11a	7:79735956-79743131	-	-	-	-
Mtfmt	9:65435781-65453054	-	-	-	-
Dkk3	7:112116018-112159057	-	-	up	-
Bmi1	2:18677017-18686629	-	-	-	-
Phyh	2:4919018-4938730	-	-	up	-
Kdm7a	6:39118407-39206789	-	-	-	-
Gpr68	12:100779056-100908198	-	not expressed	not expressed	-
Naa35	13:59585258-59634798	-	-	-	-
Arl15	13:113794504-114157461	-	-	-	-
Tipin	9:64281606-64304792	-	-	-	-
Ndufa4l2	10:127514938-127522444	-	-	-	-
Chtf18	17:25717170-25727419	not expressed	not expressed	not expressed	-
Zfp775	6:48613179-48623227	-	-	-	-
Dnm1	2:32308470-32381938	-	not expressed	-	-
Dagla	19:10245264-10304877	-	not expressed	-	-
Rpf2	10:40223245-40247036	-	-	-	-
Frrs1l	4:56957172-56990391	-	not expressed	not expressed	not expressed
Cnot4	6:35022065-35133737	-	-	-	-
Tbc1d19	5:53809626-53904380	-	not expressed	-	-
Galk1	11:116008456-116012719	-	-	-	-
AI837181	19:5425156-5427313	-	-	-	-
Tmem143	7:45896940-45917413	-	-	-	-
Fam107a	14:8296273-8318023	-	not expressed	not expressed	-
Cc2d1b	4:108619939-108637441	-	-	-	-
Dnajb5	4:42949813-42959425	-	-	-	-
Ybx1	4:119277980-119294604	-	-	-	-
Gm6419	10:74862987-74863419	-	-	up	-
Zfpm1	8:119910359-124345724	-	-	-	-
Dcun1d5	9:7184565-7207031	-	-	-	-
Apold1	6:134982000-134986836	-	not expressed	not expressed	not expressed
Nlk	11:78567167-78697373	-	-	-	-
Mettl2	11:105126424-105140394	-	-	-	-
Fam81a	9:70089309-70142560	-	not expressed	not expressed	not expressed
Rspo1	4:124957646-125009099	-	not expressed	not expressed	-
Rpp25	9:57504101-57505447	-	not expressed	not expressed	-
Il17ra	6:120463196-120483727	-	-	-	-
Tcerg1l	7:138208973-138397730	-	not expressed	not expressed	not expressed
Cav2	6:17197750-17385604	-	not expressed	-	-
Proser1	3:53463665-53481755	-	-	-	-
Slc17a5	9:78536487-78588041	-	-	-	-
Ncapd2	6:125168006-125191701	-	-	-	-
Ddx54	5:120613129-120634235	-	-	-	-
2900076A07Rik,Mir1839	7:81523549-81532521	-	-	-	-
Map3k10	7:27656374-27674598	-	-	-	-
C030014I23Rik	9:44477923-44482180	-	not expressed	not expressed	not expressed
Nr4a2	2:57106829-57124003	-	not expressed	not expressed	-
Gm13408	2:34406770-34624950	-	-	-	-
Car11	7:45699842-45704682	-	not expressed	-	-
Crym	7:120186379-120202111	-	not expressed	-	-
Slc35f6	5:30647932-30659731	-	-	-	-
Rprml	11:103649569-103650579	-	not expressed	not expressed	-
Zfp651	9:121760032-121771742	-	not expressed	-	-
D430041D05Rik	2:104143072-104410334	-	not expressed	-	not expressed
Gstp2	19:4040284-4042236	-	up	-	-
Gm4799	10:82954343-82955000	-	-	-	-
Nbea	3:55625204-56183701	-	not expressed	not expressed	-
Calr-ps	2:140395308-142392966	-	-	-	-
Ppp1r1a	15:103530278-103537992	-	not expressed	up	-
Zdhhc4	5:143316488-143332704	-	-	-	-
Rbp1	9:98422960-98446575	-	up	-	-
Enc1	13:97241104-97253039	-	-	not expressed	-
Tmem178	17:80944631-81001816	-	not expressed	not expressed	not expressed
Zfp804a	2:82053221-82259879	up	not expressed	not expressed	not expressed
Khdrbs3	15:68928419-69093512	-	-	-	-
Eif5al3-ps	5:90132228-90132675	-	-	-	-
Psmd10	X:140948428-140956728	-	-	-	-
Pnpla8	12:44221369-44312343	-	-	-	-
Adcy1	11:7063488-7178506	-	not expressed	not expressed	not expressed
Zfp281	1:136624900-136630053	-	-	-	-
Slc25a16	10:62920632-62946498	-	-	-	-
Mfsd4	1:131962953-132068062	-	not expressed	-	not expressed
Slc2a13	15:91267695-91573261	-	not expressed	not expressed	-
Rspo2	15:43020810-43170818	-	not expressed	not expressed	not expressed
AI854517	7:79500025-79534403	-	not expressed	not expressed	not expressed
Sorbs2	8:45507787-45827906	-	-	down	down
Gm6733	11:72796225-72927120	-	-	-	-
Dmtn	14:70602183-70636048	-	not expressed	not expressed	-
Jakmip2	18:43531407-43687773	-	not expressed	not expressed	not expressed
Cwf19l1	19:44108643-44135876	-	-	-	-
Rps27a	11:29545845-29578367	-	-	-	-
Arhgap20	9:51765336-51875886	-	not expressed	-	-
Mir124-2hg,Mir124a-2	3:17789920-17808970	-	not expressed	not expressed	not expressed
Trim9	12:70244538-70347614	-	not expressed	not expressed	not expressed
Lgi1	19:38264781-38308939	-	not expressed	not expressed	not expressed
Aspg	12:112106682-112127573	not expressed	-	not expressed	-
Gm8805	1:65552681-65552994	-	-	-	-
Ift27	15:78159464-78174108	-	-	-	-
Gm10651	7:27949154-27949763	-	-	-	-
Ogfrl1	1:23366423-23397772	-	-	-	-
Csmd2	4:127987856-128567656	-	not expressed	not expressed	not expressed
C1qbp	11:70977835-70983026	up	-	-	-
H2-Q5	17:35394125-35397800	not expressed	-	-	-
Zc2hc1a	3:7503482-7553836	-	not expressed	-	-
Lztfl1	9:123635387-123851899	-	-	-	-
Gm6285	X:104947784-104948282	-	-	-	-
Nyap1	5:137730882-137741607	-	not expressed	not expressed	not expressed
Plk2	13:110395043-110400844	up	-	-	-
Mansc1	6:134609209-134632488	-	not expressed	not expressed	-
Bsn	9:108096021-108190384	-	not expressed	not expressed	not expressed
Pomc	12:3954950-3960618	down	not expressed	not expressed	not expressed
Matn2	15:34306679-34436242	-	not expressed	not expressed	-
Ncoa3	2:165992635-166155663	-	-	-	-
Eif4ebp1	8:27260326-27275656	-	-	-	-
Rpl5-ps1	1:14865071-14865965	-	-	-	-
Fzd2	11:102604395-102608058	-	not expressed	not expressed	-
Gm5829	1:71709704-71710055	-	-	-	-
Gm24862	7:59384596-59411173	-	not expressed	not expressed	not expressed
Nlrx1	9:44252712-44268599	-	-	-	-
Gm11225	4:70047156-70048205	-	up	-	-
Agbl3	6:34780431-34859459	-	-	not expressed	-
Rem2	14:54476099-54480431	-	not expressed	not expressed	not expressed
Lrp10	14:54464163-54471497	-	-	-	-
Ubtd1	19:41981762-42034641	-	-	-	-
Gtf2f1	17:57003404-57011288	-	-	-	-
Gm15443	1:149025227-149026047	-	-	-	-
Nxph3	11:95509844-95514570	-	not expressed	not expressed	-
Fech	18:64456549-64489066	-	-	-	-
Bend6	1:33852051-33907816	-	not expressed	not expressed	-
Pnisr	4:21847582-21876475	-	-	-	-
Trpc1	9:95705081-95750375	-	not expressed	not expressed	not expressed
Zfp61	7:24291038-24301232	-	not expressed	-	-
Gca	2:62664284-63184287	-	not expressed	-	-
Xbp1	11:5520658-5525893	-	-	-	-
Emc10	7:44489936-44496529	-	-	-	-
Ambra1	2:91730133-91918849	-	-	-	-
Tet1	10:62804569-62899118	-	not expressed	not expressed	not expressed
Ddt,Gm20441,Gstt3	10:75771229-75781414	-	-	-	-
Kctd15	7:34639013-34660416	-	-	-	-
Gm10705	3:87207544-87208005	-	-	-	-
Acbd6	1:155558119-155691330	-	-	-	-
Unc5a	13:54949410-55021385	-	not expressed	-	up
Rps23-ps	3:37714189-37724490	-	-	-	-
Gm561	2:144594053-144595366	-	-	-	-
Cyp4f15	17:32685626-32703352	-	-	not expressed	not expressed
Cib2	9:54538983-54560218	-	-	-	-
Ppp1r9b	11:94991034-95006899	-	-	-	-
Pak1	7:97842934-97912381	-	not expressed	-	-
Atp6v0c	17:24163865-24169702	-	-	-	-
Fiz1	7:5007056-5014697	-	-	-	-
Sec14l1	11:117115167-117159268	-	-	-	-
Lrrc8b	5:105415774-105486189	-	not expressed	not expressed	-
Gm18737	17:37860806-37861743	-	-	-	-
2017-09-15	3:144570303-144597680	-	-	-	-
Smap1	1:23761752-23922317	-	-	-	-
Mink1	11:70562880-70614483	-	-	-	-
AW554918	18:24709444-25467321	-	not expressed	-	-
Tuba8	6:121210733-121226854	-	-	-	not expressed
[truncated: 16,644 more rows]
