# Supplementary material for: Common and unique transcriptional responses to dietary restriction and loss of insulin receptor substrate 1 (IRS1) in mice
Source: Aging (Albany NY). 2018 May 20;10(5):1027–52. doi: 10.18632/aging.101446 (PMC5990393; doi:10.18632/aging.101446)
Supplement: Supplementary Table S5 [file aging-10-101446-s006.xlsx]

## Sheet: GO_DR_up.txt
GO ID	GO Term	GO Category	Total Genes	LIVER WTDR UP	SM WTDR UP	BRAIN WTDR UP	WAT WTDR UP	LIVER WTDR UP Genes	SM WTDR UP Genes	BRAIN WTDR UP Genes	WAT WTDR UP Genes
GO:0044281	small molecule metabolic process	BP	1549	0.214569	3.47123e-05	0.317645	4.71049e-08	Nsdhl;Gstp1;Rbp1;Lpl;Fdps;Sdhb;Nit2;Pcsk9;Cyp2c54;Ass1;Grhpr;Upp2;Mif;Gstp2;Aldoc	Elovl6;Actc1;Apoa1;Ndufs6;Dkk3;Phyh;Ak4;Rbp4;Apoa2;Hmgcs2;Apoc1;Ehhadh;Slc37a4;Ramp1;Ache;Ttr;Apoe;Acaa1b;Ndufc2;Agt;Prkag3;Ddx1;Adh1;Macrod1	Arhgap33;Vip;Elmod1;Gda;Plcb1;Chchd10;Cdkl5	Elovl6;Acaca;Fdps;Pmvk;Egln3;Tkt;Mrap;Acss2;Mpc1;Atp1a3;Chchd10;Rdh11;Ckm;Me1;Rasd1;Acly
GO:0006084	acetyl-CoA metabolic process	BP	23	1	1	1	1.62506e-07				Acaca;Pmvk;Acly;Acss2
GO:0044711	single-organism biosynthetic process	BP	759	0.549975	0.00143234	0.525477	6.69456e-07	Lpl;Fdps;Zpr1;Mif;Nsdhl;Ass1	Elovl6;Apoa1;Ak4;Dkk3;Agt;Ramp1;Prkag3;Adh1;Hmgcs2;Apoa2;Thrsp;Rbp4;Apoe	Vip;Chchd10;C1qbp	Elovl6;Atp1a3;Acly;Ckm;Fdps;Acss2;Tkt;Pmvk;Acaca;Chchd10;Mrap
GO:0044283	small molecule biosynthetic process	BP	262	0.0612935	0.000306447	1	2.33694e-06	Ass1;Lpl;Fdps;Nsdhl;Mif	Elovl6;Apoa1;Dkk3;Prkag3;Agt;Apoa2;Hmgcs2;Apoe		Elovl6;Fdps;Acss2;Acaca;Pmvk;Acly;Ckm
GO:0090407	organophosphate biosynthetic process	BP	279	0.873029	0.036657	0.279222	2.9927e-06	Fdps	Apoa2;Ramp1;Apoa1;Ak4;Apoe	Vip;Chchd10	Atp1a3;Fdps;Ckm;Mrap;Pmvk;Tkt;Chchd10
GO:0044444	cytoplasmic part	CC	4367	0.00216768	0.0340583	0.539833	5.48322e-06	Vti1b;Rps6;Rpl26;Rpl17;Ndufa4;Cox7a2;Rbp1;Ass1;Rps17;Ndufa2;Fdps;Tceb1;Nsdhl;Gstp1;Fmo3;Gsta4;Rps16;Pcsk9;Grhpr;Ndufs8;Rps15;Rps14;Atp6v0d2;Rpl32;Cyp2c70;Rps24;Rps18;Rps11;Cyp2c54;Ppib;Rps23;Cyp2j9;Sdhb;Hsd17b6;Rps27l;Rps4x;Fau;Nit2;Rps25;Slc17a8;Aldoc;Rps5;Gstp2;Serpina1e;Etnppl;Cyp3a11	Actc1;Elovl6;Phyh;Cisd1;Mrps21;Reep6;Slc25a47;Cox7a2;Ndufa3;Mrpl42;Hmgcs2;Apoe;Ndufs6;Ehhadh;Adh1;Ndufs5;Dad1;Mpst;Rpl7a;Macrod1;Rps29;Serpina1b;Tfrc;Ddx1;Ak4;Cox6b1;Ache;Cyp2e1;Slc37a4;Rps27l;Ndufc2;Acaa1b;Apoa1;Mrpl34;Thrsp;Ndufc1;H2-Q10;Jsrp1;Rgma	Actn1;Chchd10;Syne1;C1qbp;Btbd1;Mef2c;Prss12;Cdkl5;Homer1;Plcb1;Plk2;Chgb;Prkcb;Cnksr2;Rpl37a;Gpr6	Elovl6;Me1;Tkt;Chchd10;Oxtr;Mrap;Fdps;Bhlhe40;Mpc1;Slc25a1;Enpep;Atp1a3;Rasd1;Actn3;Acly;Fn3k;Parm1;Pmvk;Egln3;Acaca;Rdh11;Tnni2
GO:0006637	acyl-CoA metabolic process	BP	51	1	0.278656	1	5.96008e-06		Ehhadh		Pmvk;Acly;Acaca;Acss2
GO:0035383	thioester metabolic process	BP	51	1	0.278656	1	5.96008e-06		Ehhadh		Acaca;Acly;Acss2;Pmvk
GO:0005737	cytoplasm	CC	6340	0.0813174	0.324732	0.70331	2.19042e-05	Rpl17;Ndufs8;Ndufa2;Zpr1;Rbp1;Etnppl;Hipk3;Vti1b;Cox7a2;Grhpr;Serpina1e;Hsd17b6;Gsta4;Ndufa4;Ass1;Fdps;Rps6;Rpl26;Rps11;Nit2;Rps17;Rps14;Pcsk9;Mif;Nsdhl;Atp6v0d2;Upp2;Fmo3;Ppib;Aox3;Rps24;Slc17a8;Cyp2c70;Gstp1;Rps5;Rps16;Rps18;Cyp2c54;Rps25;Rpl32;Tceb1;Fau;Cyp3a11;Sult3a1;Rps27l;Sdhb;Rps23;Rps15;Rps4x;Cyp2j9;Gstm6;Aldoc;Nop56;Gstp2	Ndufs5;Actc1;Cox7a2;Reep6;Aqp4;Mrps21;Socs2;Ehhadh;Cisd1;Dusp23;Slc25a47;Serpina1b;Tfrc;Hmgcs2;Cyp2e1;Apoe;Mrpl34;Rps29;Slc37a4;Dupd1;Mpst;Nrep;Mrpl42;Ndufc2;Elovl6;Ndufs6;Macrod1;Ache;H2-Q10;Dad1;Ddx1;Rpl7a;Ak4;Apoa1;Alb;Phyh;Ppp1r1a;Cox6b1;Jsrp1;Ndufc1;Ndufa3;Rps27l;Acaa1b;Adh1;Thrsp;Rgma;Agt	Syne1;C1qbp;Homer1;Chchd10;Nr4a1;Btbd1;Actn1;Plcb1;Prss12;Camk4;Prkcb;Arhgap33;Hnmt;Upf3a;Egr1;Cnksr2;Mef2c;Gpr6;Plk2;Chgb;Cdkl5;Rpl37a	Slc25a1;Enpep;Stk40;Pmvk;Tkt;Acss2;Chchd10;Fdps;Oxtr;Acaca;Mrap;Atp1a3;Fn3k;Me1;Rdh11;Elovl6;Mpc1;Acly;Parm1;Tnni2;Actn3;Bhlhe40;Ckm;Egln3;Rasd1
GO:0044710	single-organism metabolic process	BP	3094	0.0112776	0.00148635	0.703606	3.07767e-05	Aldoc;Nsdhl;Lpl;Rbp1;Rarres2;Fdps;C8b;Cyp3a11;Gstp1;Hipk3;Ass1;Fmo3;Nit2;Cyp2j9;Ndufa4;Serpina6;Cyp2c44;Mif;Grhpr;Ndufs8;Cyp2c54;Cyp2c67;Pcsk9;Upp2;Rps27l;Ndufa2;Cyp2c70;Zpr1;Sdhb;Hsd17b6;Cyp2c68;Aox3;Shfm1;Gstp2	Ndufs5;Ehhadh;Elovl6;Apoa1;Ndufs6;Agt;Hmgcs2;Ak4;Thrsp;Prkag3;Apoc1;Actc1;Apoa2;Ttr;Serpina1b;Acaa1b;Ndufa3;Adh1;Ddx1;Rbp4;Ache;Apoe;Cisd1;Ramp1;Rps27l;Cyp2e1;Macrod1;Ndufc2;Slc37a4;Ndufc1;Ppp1r1a;Phyh;Dkk3	Prkcb;C1qbp;Plcb1;Arhgap33;Gda;Elmod1;Mef2c;Chchd10;Cdkl5;Vip	Acly;Mpc1;Elovl6;Acss2;Atp1a3;Acaca;Ckm;Oxtr;Fdps;Pmvk;Mrap;Tkt;Egln3;Chchd10;Me1;Rdh11;Stk40;Rasd1
GO:0019752	carboxylic acid metabolic process	BP	552	0.00599254	0.00342078	1	3.41893e-05	Gstp2;Mif;Aldoc;Rbp1;Gstp1;Sdhb;Ass1;Lpl;Cyp2c54;Grhpr;Nit2	Acaa1b;Elovl6;Prkag3;Ndufs6;Apoa2;Adh1;Slc37a4;Agt;Phyh;Ehhadh		Ckm;Acaca;Elovl6;Me1;Acss2;Acly;Egln3;Mpc1
GO:0006732	coenzyme metabolic process	BP	162	1	0.657893	1	3.66698e-05		Ehhadh		Acaca;Acss2;Acly;Tkt;Pmvk
GO:0043436	oxoacid metabolic process	BP	584	0.00848595	0.00519098	1	5.11521e-05	Gstp2;Grhpr;Rbp1;Gstp1;Aldoc;Mif;Ass1;Sdhb;Cyp2c54;Lpl;Nit2	Elovl6;Acaa1b;Apoa2;Agt;Ehhadh;Adh1;Prkag3;Phyh;Ndufs6;Slc37a4		Egln3;Acaca;Elovl6;Ckm;Acly;Me1;Acss2;Mpc1
GO:0016053	organic acid biosynthetic process	BP	172	0.168065	0.104192	1	5.478e-05	Mif;Ass1;Lpl	Elovl6;Agt;Prkag3		Acaca;Acss2;Elovl6;Ckm;Acly
GO:0046394	carboxylic acid biosynthetic process	BP	172	0.168065	0.104192	1	5.478e-05	Ass1;Mif;Lpl	Elovl6;Agt;Prkag3		Acaca;Ckm;Acss2;Acly;Elovl6
GO:0006082	organic acid metabolic process	BP	592	0.00966275	0.00567644	1	5.63519e-05	Ass1;Gstp1;Rbp1;Cyp2c54;Mif;Nit2;Aldoc;Sdhb;Grhpr;Lpl;Gstp2	Ehhadh;Elovl6;Adh1;Acaa1b;Slc37a4;Phyh;Apoa2;Agt;Prkag3;Ndufs6		Egln3;Acaca;Ckm;Me1;Elovl6;Acly;Mpc1;Acss2
GO:0006633	fatty acid biosynthetic process	BP	90	0.150352	0.0226302	1	6.46281e-05	Lpl;Mif	Prkag3;Elovl6;Agt		Acaca;Elovl6;Acly;Acss2
GO:0032787	monocarboxylic acid metabolic process	BP	314	0.120998	3.75974e-05	1	8.30942e-05	Cyp2c54;Lpl;Aldoc;Mif;Rbp1	Elovl6;Prkag3;Ndufs6;Slc37a4;Acaa1b;Ehhadh;Adh1;Apoa2;Phyh;Agt		Elovl6;Egln3;Acaca;Mpc1;Acly;Acss2
GO:0008610	lipid biosynthetic process	BP	317	0.250174	0.000216514	1	9.39866e-05	Nsdhl;Mif;Lpl;Fdps	Hmgcs2;Apoa2;Thrsp;Apoa1;Elovl6;Prkag3;Dkk3;Agt;Apoe		Acaca;Acly;Elovl6;Acss2;Fdps;Pmvk
GO:0051186	cofactor metabolic process	BP	199	1	0.737579	1	9.8773e-05		Ehhadh		Acly;Acss2;Acaca;Pmvk;Tkt
GO:0006793	phosphorus metabolic process	BP	2093	0.991908	0.235839	0.240894	0.000113225	Hipk3;Rarres2;Gstp1;Pcsk9;Upp2;Fdps;Mif;Aldoc	Apoe;Ddx1;Ehhadh;Mark3;Ahsg;Prkag3;Apoa1;Agt;Vtn;Rgma;Ramp1;Dusp23;Actc1;Ndufc2;Dupd1;Ak4;Apoa2	Plcb1;Mef2c;Plk2;Prkcb;Chchd10;Camk4;Cdkl5;Arhgap33;Vip;Elmod1	Stk40;Pmvk;Acaca;Ckm;Chchd10;Atp1a3;Tkt;Mrap;Acss2;Oxtr;Acly;Fdps;Fn3k;Rasd1
GO:0006720	isoprenoid metabolic process	BP	43	0.00637916	3.07937e-07	1	0.000120269	Rarres2;Fdps;Rbp1	Rbp4;Hmgcs2;Ttr;Adh1;Phyh;Cyp2e1		Fdps;Rdh11;Pmvk
GO:0072330	monocarboxylic acid biosynthetic process	BP	113	0.241013	0.0381508	1	0.000145051	Mif;Lpl	Elovl6;Prkag3;Agt		Acly;Acss2;Elovl6;Acaca
GO:0044255	cellular lipid metabolic process	BP	489	0.0930964	1.56114e-09	1	0.000149216	Lpl;Cyp2c54;Rbp1;Fdps;Mif;Rarres2;Pcsk9	Prkag3;Thrsp;Acaa1b;Rbp4;Elovl6;Ehhadh;Adh1;Agt;Apoe;Cyp2e1;Phyh;Apoa1;Slc37a4;Ttr;Ndufs6;Hmgcs2;Apoa2;Apoc1		Acaca;Elovl6;Pmvk;Fdps;Acly;Acss2;Rdh11
GO:0005865	striated muscle thin filament	CC	11	1	1	1	0.00015524				Actn3;Tnni2
GO:0046390	ribose phosphate biosynthetic process	BP	124	1	0.188266	0.0824582	0.000155327		Ramp1;Apoe	Vip;Chchd10	Atp1a3;Mrap;Chchd10;Tkt
GO:0044237	cellular metabolic process	BP	5688	0.784458	0.208082	0.656711	0.000180201	Hipk3;Utp14a;Rbp1;Grhpr;Mif;Rps4x;Ppib;Rarres2;Shfm1;Upp2;Cpsf3;Rps6;Sdhb;Ass1;Rpl32;Cwc15;Apcs;Zpr1;Rps17;Tceb1;Rps16;Rps11;Rps15;Rps23;Lpl;Pcsk9;Rpl26;Rps14;Aldoc;Gstp2;Rpl17;Gstp1;Nit2;Fmo3;Cyp2c54;Rps18;Rps5;Rps24;Fdps;Rps27l	Dbp;Ak4;Apoa2;Ttr;Ddx1;Cisd1;Actc1;Adh1;Rbp4;Agt;Apoe;Elovl6;Acaa1b;Ehhadh;Prkag3;Ndufc2;Rgma;Hmgcs2;Dusp23;Ahsg;Thrsp;Apoa1;Pfdn1;Ache;Mrpl34;Dupd1;Ppp1r1a;Macrod1;Apoc1;Vtn;Slc37a4;Rps29;Ramp1;Phyh;Dkk3;Mpst;Serpina1b;Aes;Mark3;Mrps21;Ndufs6;Rps27l;Cyp2e1	Camk4;Drap1;Upf3a;Nr4a1;Fezf2;Npas4;Tbr1;C1qbp;Arhgap33;Plk2;Chchd10;Plcb1;Cdkl5;Prkcb;Mef2c;Gda;Elmod1;Egr1;Rpl37a;Vip	Atp1a3;Mrap;Acaca;Ckm;Pmvk;Enpep;Chchd10;Elovl6;Tkt;Fn3k;Acly;Oxtr;Parm1;Stk40;Acss2;Bhlhe40;Mpc1;Me1;Rdh11;Tnni2;Egln3;Rasd1;Fdps
GO:0036379	myofilament	CC	12	1	1	1	0.000199298				Tnni2;Actn3
GO:0019842	vitamin binding	MF	48	0.328892	0.0372546	1	0.000240192	Rbp1	Phyh;Rbp4		Tkt;Acaca;Egln3
GO:0003012	muscle system process	BP	149	0.535371	0.0293522	0.103848	0.000265161	Fdps	Agt;Jsrp1;Ndufs6;Actc1	Homer1;Mef2c	Actn3;Oxtr;Tnni2;Fdps
GO:0003008	system process	BP	609	0.325805	0.0179655	0.00371129	0.000359907	Mif;Slc17a8;Grhpr;Kng1;Fdps	Agt;Ndufs6;Actc1;Apoe;Rbp4;Jsrp1;Apoa2;Apoa1;Aqp4	Vip;Egr1;Camk4;Mef2c;Gpr88;Plk2;Plcb1;Homer1	Stk40;Atp1a3;Oxtr;Enpep;Fdps;Actn3;Tnni2
GO:0006085	acetyl-CoA biosynthetic process	BP	13	1	1	1	0.000372764				Acly;Acss2
GO:0016405	CoA-ligase activity	MF	16	1	1	1	0.00052043				Acss2;Acly
GO:0035384	thioester biosynthetic process	BP	16	1	1	1	0.000590367				Acss2;Acly
GO:0071616	acyl-CoA biosynthetic process	BP	16	1	1	1	0.000590367				Acss2;Acly
GO:0006790	sulfur compound metabolic process	BP	170	0.40649	0.308216	1	0.000744493	Gstp1;Gstp2	Mpst;Ehhadh		Acly;Acaca;Acss2;Pmvk
GO:0008299	isoprenoid biosynthetic process	BP	18	0.143009	0.115931	1	0.000762372	Fdps	Hmgcs2		Pmvk;Fdps
GO:0006629	lipid metabolic process	BP	663	0.0387169	2.58082e-08	0.915409	0.000859603	Rbp1;Nsdhl;Lpl;Serpina6;Hsd17b6;Mif;Fdps;Rarres2;Cyp2c54;Pcsk9	Ehhadh;Prkag3;Elovl6;Adh1;Apoe;Rbp4;Hmgcs2;Apoa2;Slc37a4;Apoa1;Thrsp;Ttr;Agt;Ndufs6;Cyp2e1;Acaa1b;Apoc1;Dkk3;Phyh	Plcb1	Acaca;Elovl6;Pmvk;Rdh11;Fdps;Acly;Acss2
GO:0006721	terpenoid metabolic process	BP	27	0.00193974	1.9876e-05	1	0.00166163	Rarres2;Rbp1;Fdps	Ttr;Rbp4;Cyp2e1;Adh1		Rdh11;Fdps
GO:0006631	fatty acid metabolic process	BP	218	0.251631	9.319e-05	1	0.0018239	Mif;Cyp2c54;Lpl	Phyh;Agt;Apoa2;Ndufs6;Acaa1b;Elovl6;Ehhadh;Prkag3		Acaca;Acss2;Elovl6;Acly
GO:0006066	alcohol metabolic process	BP	188	0.0664871	3.20502e-07	1	0.010446	Fdps;Rbp1;Pcsk9;Nsdhl	Rbp4;Ttr;Adh1;Hmgcs2;Ache;Apoe;Dkk3;Apoc1;Apoa1;Apoa2		Fdps;Rdh11;Pmvk
GO:0008203	cholesterol metabolic process	BP	79	0.0331655	0.000115796	1	0.0153658	Nsdhl;Fdps;Pcsk9	Apoe;Apoa2;Hmgcs2;Apoc1;Apoa1		Fdps;Pmvk
GO:0046165	alcohol biosynthetic process	BP	82	0.133714	0.000197909	1	0.0165045	Fdps;Nsdhl	Apoa1;Apoe;Dkk3;Apoa2;Hmgcs2		Fdps;Pmvk
GO:0030017	sarcomere	CC	102	1	0.602916	0.000210784	0.0165049		Actc1	Mef2c;Actn1;Homer1;Syne1	Tnni2;Actn3
GO:0016125	sterol metabolic process	BP	84	0.0381938	0.000163144	1	0.0172833	Fdps;Pcsk9;Nsdhl	Apoa1;Apoa2;Apoc1;Hmgcs2;Apoe		Fdps;Pmvk
GO:1901615	organic hydroxy compound metabolic process	BP	241	0.127625	2.95777e-07	1	0.0194064	Nsdhl;Rbp1;Fdps;Pcsk9	Ache;Apoa1;Rbp4;Adh1;Slc37a4;Apoc1;Dkk3;Apoa2;Ttr;Apoe;Hmgcs2		Pmvk;Fdps;Rdh11
GO:0055114	oxidation-reduction process	BP	640	7.48856e-05	1.4005e-05	1	0.0195239	Cyp2c68;Grhpr;Sdhb;Cyp2c67;Cyp2j9;Fmo3;Aox3;Cyp2c54;Nsdhl;Ndufa2;Cyp3a11;Hsd17b6;Ndufa4;Cyp2c70;Cyp2c44;Ndufs8	Ehhadh;Ndufs5;Cyp2e1;Ndufc1;Apoa1;Adh1;Ndufc2;Phyh;Slc37a4;Prkag3;Ppp1r1a;Ndufs6;Cisd1;Apoa2;Ndufa3		Me1;Rdh11;Stk40;Tkt;Egln3
GO:0044449	contractile fiber part	CC	114	1	0.634603	0.000321656	0.0209199		Actc1	Actn1;Homer1;Mef2c;Syne1	Actn3;Tnni2
GO:0030016	myofibril	CC	120	1	0.663793	0.000390465	0.022635		Actc1	Mef2c;Homer1;Syne1;Actn1	Actn3;Tnni2
GO:1901617	organic hydroxy compound biosynthetic process	BP	100	0.178913	0.000463542	1	0.0227158	Fdps;Nsdhl	Apoa2;Apoe;Dkk3;Apoa1;Hmgcs2		Fdps;Pmvk
GO:0042572	retinol metabolic process	BP	12	0.0854383	4.1675e-05	1	0.0241613	Rbp1	Adh1;Ttr;Rbp4		Rdh11
GO:0007611	learning or memory	BP	135	1	1	2.22967e-05	0.0245124			Plcb1;Egr1;Vip;Camk4;Mef2c;Plk2	Oxtr;Atp1a3
GO:0043292	contractile fiber	CC	130	1	0.688326	0.000539923	0.0266991		Actc1	Actn1;Syne1;Mef2c;Homer1	Actn3;Tnni2
GO:0005829	cytosol	CC	995	0.000127692	0.830565	0.144787	0.0306526	Rpl17;Rpl32;Rps17;Gstp2;Rps14;Fau;Rps6;Rps16;Rps23;Rps11;Grhpr;Rbp1;Rps15;Rpl26;Rps24;Rps18;Gstp1;Rps25;Rps5	Adh1;Thrsp;Rps29;Ehhadh;Rpl7a	C1qbp;Mef2c;Prkcb;Rpl37a;Gpr6;Plcb1	Oxtr;Fn3k;Pmvk;Me1;Egln3;Acaca
GO:0050890	cognition	BP	144	1	1	4.09255e-05	0.0312398			Plk2;Mef2c;Egr1;Plcb1;Vip;Camk4	Atp1a3;Oxtr
GO:0016491	oxidoreductase activity	MF	494	1.08426e-06	0.0397475	1	0.0326107	Ndufs8;Ndufa4;Cyp2j9;Nsdhl;Fmo3;Cyp2c54;Cyp2c70;Cyp2c68;Cyp2c67;Cox7a2;Aox3;Grhpr;Sdhb;Cyp2c44;Hsd17b6;Cyp3a11;Ndufa2	Cyp2e1;Ehhadh;Ndufc2;Adh1;Cox7a2;Phyh;Cox6b1		Egln3;Me1;Rdh11;Fn3k
GO:0034308	primary alcohol metabolic process	BP	17	0.128961	0.000153973	1	0.0360304	Rbp1	Adh1;Rbp4;Ttr		Rdh11
GO:0005739	mitochondrion	CC	1331	0.164368	0.000118478	0.953695	0.0362419	Ass1;Sdhb;Fdps;Ndufa2;Aldoc;Gstp1;Gsta4;Ndufa4;Etnppl;Ndufs8;Rps14;Nit2;Gstp2;Cox7a2	Hmgcs2;Slc25a47;Ehhadh;Ndufs6;Cisd1;Mrps21;Ndufa3;Ndufs5;Ak4;Ndufc2;Phyh;Macrod1;Cox6b1;Mrpl42;Mpst;Adh1;Tfrc;Cox7a2;Mrpl34;Acaa1b;Ndufc1;Cyp2e1	Chchd10;C1qbp	Chchd10;Mpc1;Fdps;Acaca;Me1;Acly;Slc25a1
GO:0031406	carboxylic acid binding	MF	134	0.000748884	0.206448	1	0.0419819	Gsta4;Ass1;Gstp1;Fmo3;Gstp2;Grhpr	Phyh;Alb		Egln3;Acaca
GO:0043177	organic acid binding	MF	135	0.000779173	0.209111	1	0.0425545	Gsta4;Gstp1;Fmo3;Ass1;Grhpr;Gstp2	Phyh;Alb		Egln3;Acaca
GO:2000243	positive regulation of reproductive process	BP	22	1	1	7.58043e-05	0.0430852			C1qbp;Plcb1;Vip	Oxtr
GO:0001523	retinoid metabolic process	BP	21	0.0158637	0.000227741	1	0.0454257	Rbp1;Rarres2	Rbp4;Adh1;Ttr		Rdh11
GO:0045940	positive regulation of steroid metabolic process	BP	22	0.163663	7.05832e-06	1	0.0477607	Fdps	Agt;Apoe;Apoa2;Apoa1		Fdps
GO:0008202	steroid metabolic process	BP	152	0.0134753	3.46594e-07	1	0.049566	Fdps;Pcsk9;Nsdhl;Serpina6;Hsd17b6	Apoe;Slc37a4;Apoa1;Apoc1;Cyp2e1;Apoa2;Agt;Dkk3;Hmgcs2		Pmvk;Fdps
GO:0016101	diterpenoid metabolic process	BP	23	0.018487	0.000321188	1	0.0500902	Rbp1;Rarres2	Ttr;Rbp4;Adh1		Rdh11
GO:0022600	digestive system process	BP	27	1	0.000574997	1	0.0639527		Apoa1;Rbp4;Apoa2		Oxtr
GO:0007586	digestion	BP	28	1	0.000653751	1	0.0662442		Rbp4;Apoa1;Apoa2		Oxtr
GO:0044708	single-organism behavior	BP	228	1	0.32154	6.68802e-05	0.0722555		Alb;Adh1	Egr1;Plcb1;Mef2c;Camk4;Plk2;Homer1;Vip	Oxtr;Atp1a3
GO:0034754	cellular hormone metabolic process	BP	39	0.295104	0.000137366	1	0.0776206	Rbp1	Adh1;Dkk3;Rbp4;Ttr		Rdh11
GO:2000241	regulation of reproductive process	BP	40	1	1	0.000649558	0.093324			C1qbp;Plcb1;Vip	Oxtr
GO:0016765	transferase activity, transferring alkyl or aryl (other than methyl) groups	MF	49	3.18135e-05	1	1	0.107372	Gstm6;Fdps;Gsta4;Gstp2;Gstp1			Fdps
GO:0019218	regulation of steroid metabolic process	BP	56	0.381359	2.79341e-05	1	0.121808	Fdps	Agt;Apoe;Apoa1;Dkk3;Apoa2		Fdps
GO:0055088	lipid homeostasis	BP	63	0.117546	0.000643299	1	0.136787	Pcsk9;Lpl	Apoa1;Apoe;Apoa2;Slc37a4		Acaca
GO:0044429	mitochondrial part	CC	534	0.130103	4.80109e-06	0.848435	0.137867	Ndufa4;Sdhb;Ndufa2;Fdps;Ass1;Cox7a2;Ndufs8	Mrpl34;Ndufa3;Mpst;Hmgcs2;Slc25a47;Ndufs6;Ak4;Ndufs5;Mrpl42;Ndufc2;Ndufc1;Cox6b1;Cox7a2;Cisd1;Mrps21	C1qbp	Slc25a1;Mpc1;Fdps
GO:0042445	hormone metabolic process	BP	73	0.45272	0.000133255	1	0.153605	Rbp1	Agt;Adh1;Rbp4;Ttr;Dkk3		Rdh11
GO:0005743	mitochondrial inner membrane	CC	310	0.102963	1.2336e-05	1	0.171931	Ndufa2;Sdhb;Ndufs8;Cox7a2;Ndufa4	Cox6b1;Ndufc1;Slc25a47;Mpst;Ndufa3;Ndufc2;Hmgcs2;Cox7a2;Ndufs5;Mrps21;Ndufs6		Slc25a1;Mpc1
GO:0065007	biological regulation	BP	5374	0.983072	0.726668	0.000532581	0.184199	Rbp1;Tceb1;Igfbp1;Gstp1;Rps24;Serpina1e;Nsdhl;Mif;Rarres2;Cpb2;Rps14;Ass1;Zpr1;Lpl;Rps6;Rps27l;Pcsk9;Fetub;Hipk3;Apcs;Kng1;Ppib;Hamp2;Rps17;Rps5;Serpina6;Rsl1d1;Mug2;C8b;Fdps	Actc1;Ache;Adh1;Nrep;Cisd1;Socs2;Dbp;Ppp1r1a;Ttr;Ddx1;Ramp1;Rgma;Alb;Vtn;Reep6;Dad1;Tfrc;Agt;H2-Q10;Apoa1;Rps27l;Ahsg;Serpina1b;Kcnc4;Rbp4;Aqp4;Dkk3;Apoa2;Slc37a4;Apoe;Thrsp;Itgb6;Aes;Jsrp1	Homer1;Nr4a1;Camk4;Ano3;Tbr1;Mef2c;C1qbp;Gpr88;Drap1;Syne1;Npas4;Arhgap33;Ppan;Vip;Gpr6;Cnksr2;Plk2;Elmod1;Vipr1;Fezf2;Prkcb;Egr1;Dkkl1;Lrrc17;Chchd10;Actn1;Plcb1;Upf3a;Rasgef1c;Cdkl5;Hnmt	Unc5a;Oxtr;Atp1a3;Rdh11;Mrap;Egln3;Tnni2;Parm1;Bhlhe40;Enpep;Chchd10;Tkt;Stk40;Rasd1;Fdps;Acaca
GO:0007610	behavior	BP	350	0.604201	0.336888	2.76971e-06	0.18583	Rarres2;Mif	Agt;Adh1;Alb	Vip;Gpr88;Plk2;Camk4;Homer1;Fezf2;Plcb1;Mef2c;Egr1;C1qbp	Atp1a3;Oxtr
GO:0019866	organelle inner membrane	CC	331	0.121834	2.38382e-05	1	0.190207	Ndufa4;Sdhb;Ndufa2;Ndufs8;Cox7a2	Ndufs6;Ndufs5;Ndufc1;Ndufa3;Mpst;Cox6b1;Mrps21;Slc25a47;Hmgcs2;Ndufc2;Cox7a2		Slc25a1;Mpc1
GO:0015850	organic hydroxy compound transport	BP	92	1	0.000252732	0.313331	0.198247		Apoa1;Rbp4;Apoa2;Agt;Apoe	Prkcb	Oxtr
GO:0031966	mitochondrial membrane	CC	403	0.0974903	2.68902e-05	1	0.257281	Ndufs8;Cox7a2;Ass1;Ndufa2;Ndufa4;Sdhb	Mpst;Cox7a2;Mrps21;Ndufc2;Ndufa3;Ndufs6;Slc25a47;Cox6b1;Ndufs5;Hmgcs2;Ndufc1;Cisd1		Slc25a1;Mpc1
GO:0022892	substrate-specific transporter activity	MF	441	0.349947	9.25211e-05	0.881073	0.274027	Ndufa4;Slc17a8;Cox7a2;Atp6v0d2	Rbp4;Ramp1;Kcnc4;Apoa1;Cox7a2;Aqp4;Apoe;Tfrc;Apoa2;Cox6b1;Slc37a4	Ano3	Atp1a3;Mpc1
GO:0005740	mitochondrial envelope	CC	428	0.12029	4.71559e-05	1	0.279932	Ndufa2;Ndufs8;Ass1;Ndufa4;Sdhb;Cox7a2	Mrps21;Ndufa3;Slc25a47;Ndufc2;Hmgcs2;Ndufs6;Mpst;Ndufc1;Ndufs5;Cisd1;Cox6b1;Cox7a2		Slc25a1;Mpc1
GO:0015980	energy derivation by oxidation of organic compounds	BP	137	0.654264	0.000364868	1	0.287923	Sdhb	Ppp1r1a;Cisd1;Prkag3;Ndufc2;Slc37a4;Ndufs6		Stk40
GO:0019216	regulation of lipid metabolic process	BP	167	0.372009	0.000883791	1	0.342261	Fdps;Rarres2	Dkk3;Thrsp;Apoe;Apoa2;Apoa1;Agt		Fdps
GO:0005215	transporter activity	MF	530	0.16665	0.000406303	0.919132	0.356781	Rbp1;Cox7a2;Slc17a8;Atp6v0d2;Nupl1;Ndufa4	Apoa1;Kcnc4;Aqp4;Cox7a2;Ramp1;Cox6b1;Tfrc;Rbp4;Apoe;Slc37a4;Apoa2	Ano3	Atp1a3;Mpc1
GO:0007517	muscle organ development	BP	195	0.709169	0.461895	0.000576004	0.37883	Fdps	Actc1;Rbp4	Mef2c;Nr4a1;Plcb1;Egr1;Homer1	Fdps
GO:0009891	positive regulation of biosynthetic process	BP	920	0.912987	0.615685	0.000349404	0.396062	Ass1;Rps27l;Zpr1;Fdps	Dbp;Apoa2;Ramp1;Apoe;Agt;Rps27l	Mef2c;Npas4;Upf3a;Vip;Nr4a1;Egr1;Plcb1;C1qbp;Tbr1;Camk4;Fezf2	Tnni2;Mrap;Fdps
GO:0051241	negative regulation of multicellular organismal process	BP	206	0.178035	9.30335e-06	0.163835	0.413439	Cpb2;Gstp1;Pcsk9	Ahsg;Agt;Socs2;Rbp4;Apoe;Aqp4;Apoa1;Apoa2;Slc37a4	C1qbp;Mef2c	Oxtr
GO:0014706	striated muscle tissue development	BP	216	0.755448	0.242289	0.000948634	0.41636	Fdps	Agt;Actc1;Rbp4	Homer1;Mef2c;Egr1;Plcb1;Nr4a1	Fdps
GO:0031967	organelle envelope	CC	631	0.215135	0.00014199	0.897355	0.462337	Ndufs8;Ndufa2;Cox7a2;Ndufa4;Sdhb;Ass1;Nupl1	Ndufs5;Cox7a2;Ndufa3;Mrps21;Apoe;Ache;Cox6b1;Ndufs6;Ndufc1;Cisd1;Ndufc2;Slc25a47;Mpst;Hmgcs2	Syne1	Slc25a1;Mpc1
GO:0031975	envelope	CC	633	0.218676	0.000146954	0.89773	0.464808	Ndufs8;Ndufa2;Cox7a2;Sdhb;Ndufa4;Ass1;Nupl1	Ndufc2;Slc25a47;Ndufc1;Ache;Mrps21;Ndufa3;Apoe;Cox7a2;Ndufs5;Cox6b1;Ndufs6;Cisd1;Mpst;Hmgcs2	Syne1	Mpc1;Slc25a1
GO:0070062	extracellular vesicular exosome	CC	1799	4.69667e-05	0.00198707	0.254786	0.475998	Sdhb;Cpb2;Ndufa4;Rps5;Rps11;Gstp2;Lpl;Kng1;Rpl26;Serpina6;Ppib;Atp6v0d2;Rarres2;Aldoc;Fetub;Rps25;Ass1;Nit2;Rps17;Rps18;Rps16;Grhpr;Cox7a2;Serpina1e;Apcs;Mif;Rps14;C8b;Gstp1	Dad1;Rgma;Actc1;Apoa2;H2-Q10;Serpina1b;Ak4;Rbp4;Itgb6;Rpl7a;Agt;Ttr;Vtn;Apoe;Rps29;Apoa1;Alb;Ahsg;Cox7a2;Cisd1;Tfrc;Dusp23;Mpst	Rpl37a;Plcb1;Prkcb;Camk4;Hnmt;Actn1;Gda;Cnksr2	Pmvk;Tkt;Acaca;Enpep;Acly
GO:0043230	extracellular organelle	CC	1802	4.90698e-05	0.00203526	0.255805	0.478024	Kng1;Rps5;Apcs;Cpb2;Lpl;Rps11;Mif;Rarres2;Rps14;Serpina1e;Gstp1;Cox7a2;Atp6v0d2;Grhpr;Rpl26;Rps18;Nit2;Ndufa4;C8b;Rps16;Ppib;Serpina6;Gstp2;Rps25;Sdhb;Fetub;Rps17;Ass1;Aldoc	Rbp4;Serpina1b;Ahsg;Cisd1;Dad1;Apoa2;Actc1;Tfrc;Apoe;Cox7a2;Alb;Rps29;Ttr;Dusp23;Apoa1;Mpst;Rgma;H2-Q10;Agt;Itgb6;Rpl7a;Vtn;Ak4	Gda;Actn1;Prkcb;Cnksr2;Plcb1;Hnmt;Camk4;Rpl37a	Enpep;Acaca;Tkt;Acly;Pmvk
GO:0065010	extracellular membrane-bounded organelle	CC	1802	4.90698e-05	0.00203526	0.255805	0.478024	Sdhb;Ass1;Apcs;Lpl;Serpina6;Kng1;Rps16;Ndufa4;Mif;Rps17;Cox7a2;Rps11;Rps18;Aldoc;Grhpr;Atp6v0d2;Rpl26;Serpina1e;Fetub;Nit2;C8b;Rps14;Cpb2;Rarres2;Rps5;Rps25;Gstp2;Ppib;Gstp1	Vtn;Actc1;Tfrc;Apoa2;Cox7a2;Apoa1;H2-Q10;Dad1;Ahsg;Cisd1;Ak4;Agt;Ttr;Dusp23;Itgb6;Alb;Mpst;Rps29;Serpina1b;Apoe;Rgma;Rpl7a;Rbp4	Actn1;Gda;Camk4;Hnmt;Plcb1;Prkcb;Cnksr2;Rpl37a	Acaca;Pmvk;Enpep;Tkt;Acly
GO:0031982	vesicle	CC	2232	0.00010917	0.0245752	0.248	0.486624	Gstp1;Ndufa4;Mif;Serpina1e;Apcs;C8b;Cox7a2;Lpl;Rps16;Rps5;Slc17a8;Serpina6;Ass1;Vti1b;Rarres2;Cpb2;Rps25;Gstp2;Grhpr;Aldoc;Ppib;Kng1;Sdhb;Rps11;Rps14;Fetub;Atp6v0d2;Nit2;Pcsk9;Rps18;Rpl26;Rps17	Apoa2;Tfrc;Apoe;Cox7a2;Itgb6;Cisd1;Actc1;Rps29;Alb;H2-Q10;Agt;Rbp4;Serpina1b;Mpst;Apoa1;Ak4;Ttr;Dusp23;Vtn;Ahsg;Rgma;Rpl7a;Dad1	Prkcb;Plcb1;Gda;Camk4;Prss12;Actn1;Chgb;Rpl37a;Cnksr2;Hnmt	Tkt;Acaca;Atp1a3;Pmvk;Enpep;Acly
GO:0061061	muscle structure development	BP	318	0.876164	0.463754	0.000779418	0.545817	Fdps	Agt;Rbp4;Actc1	Mef2c;Nr4a1;Homer1;Syne1;Egr1;Plcb1	Fdps
GO:0036477	somatodendritic compartment	CC	416	0.446654	0.709324	0.000519974	0.592062	Rps6;Zpr1;Ass1	Apoe;Ache	Plk2;Prss12;Vip;Homer1;Actn1;Syne1;Cnksr2;Cdkl5	Atp1a3
GO:0009986	cell surface	CC	363	0.446654	0.000563378	0.727534	0.610999	Pcsk9;Lpl;Mif	Apoe;Ache;H2-Q10;Ramp1;Itgb6;Aqp4;Tfrc;Apoa1;Rgma	C1qbp	Enpep
GO:0031988	membrane-bounded vesicle	CC	2086	2.87472e-05	0.0118268	0.298617	0.611915	Ass1;Serpina1e;C8b;Rarres2;Rps16;Cox7a2;Apcs;Mif;Kng1;Rps11;Lpl;Ndufa4;Cpb2;Gstp2;Rps25;Rps5;Slc17a8;Rpl26;Pcsk9;Vti1b;Grhpr;Nit2;Fetub;Rps17;Serpina6;Rps18;Rps14;Sdhb;Aldoc;Gstp1;Atp6v0d2;Ppib	Apoe;Tfrc;Itgb6;Cox7a2;Apoa2;Rpl7a;Actc1;Cisd1;H2-Q10;Rps29;Vtn;Ak4;Mpst;Alb;Serpina1b;Rbp4;Rgma;Ttr;Agt;Apoa1;Dad1;Ahsg;Dusp23	Gda;Actn1;Cnksr2;Rpl37a;Chgb;Prkcb;Plcb1;Camk4;Hnmt	Enpep;Acaca;Tkt;Pmvk;Acly
GO:2000026	regulation of multicellular organismal development	BP	845	0.508127	0.193888	0.00027322	0.625358	Apcs;Zpr1;Cpb2;Rbp1;Mif;Fdps	Ahsg;Ache;Apoe;Agt;Nrep;Apoa1;Socs2;Rbp4	Plcb1;Lrrc17;Mef2c;Cdkl5;Prkcb;Syne1;C1qbp;Fezf2;Plk2;Egr1;Tbr1	Oxtr;Fdps
GO:0044421	extracellular region part	CC	2130	1.50923e-05	3.76281e-05	0.175231	0.646043	Mif;Apcs;Lpl;Igfbp1;Cox7a2;Atp6v0d2;Ndufa4;Cpb2;Kng1;Rps17;Nit2;Fau;C8b;Pcsk9;Rps11;Mug2;Rpl26;Sdhb;Fetub;Rps16;Serpina1e;Rps14;Serpina6;Aldoc;Gstp1;Grhpr;Rps18;Rps25;Ass1;Ppib;Rps5;Rarres2;Gstp2	Apoc1;Apoa2;Rbp4;Ahsg;Vtn;Cox7a2;Dkk3;Tfrc;Ttr;Prkag3;Itgb6;Actc1;Cisd1;Dusp23;Ache;Mpst;Ramp1;Apoe;H2-Q10;Rgma;Rps29;Fmod;Alb;Dad1;Serpina1b;Ppp1r1a;Agt;Apoa1;Rpl7a;Ak4	Lrrc17;Prkcb;Gda;C1qbp;Camk4;Hnmt;Plcb1;Cnksr2;Actn1;Rpl37a	Pmvk;Tkt;Acly;Enpep;Acaca
GO:0060284	regulation of cell development	BP	440	0.783318	0.143317	0.000484142	0.647422	Fdps;Mif	Apoa1;Nrep;Apoe;Ache;Socs2	Tbr1;C1qbp;Mef2c;Syne1;Plk2;Fezf2;Cdkl5;Plcb1	Fdps
GO:0031328	positive regulation of cellular biosynthetic process	BP	901	0.96497	0.597213	0.000294151	0.661159	Zpr1;Rps27l;Ass1	Ramp1;Dbp;Agt;Rps27l;Apoe;Apoa2	Tbr1;Egr1;Npas4;Mef2c;Vip;Camk4;Nr4a1;Plcb1;C1qbp;Fezf2;Upf3a	Tnni2;Mrap
GO:0005576	extracellular region	CC	2289	7.48759e-06	0.000122165	0.017141	0.714531	Rps5;Rps14;Igfbp1;Serpina1e;Mup21;Lpl;Serpina6;Pcsk9;Rps17;Apcs;Kng1;Rarres2;C8b;Hamp2;Grhpr;Mug2;Ass1;Fetub;Nit2;Rps18;Ndufa4;Mif;Cpb2;Ppib;Rps25;Gstp2;Gstp1;Atp6v0d2;Rps16;Fau;Sdhb;Cox7a2;Aldoc;Rps11;Rpl26	Apoc1;Cisd1;Dkk3;Rps29;Apoa2;Rbp4;Actc1;Dad1;Vtn;Rpl7a;Tfrc;Ttr;Prkag3;Dusp23;Apoe;Alb;Rgma;Apoa1;Serpina1b;Ramp1;Ahsg;Ache;H2-Q10;Itgb6;Ppp1r1a;Fmod;Cox7a2;Agt;Ak4;Mpst	C1qbp;Gda;Plcb1;Vip;Prss12;Lrrc17;Prkcb;Camk4;Chgb;Actn1;Dkkl1;Cnksr2;Hnmt;Rpl37a	Pmvk;Enpep;Acly;Acaca;Tkt
GO:0050793	regulation of developmental process	BP	1114	0.368127	0.482637	0.000697442	0.777938	Lpl;Rbp1;Mif;Cpb2;Zpr1;Rsl1d1;Fdps;Apcs;Rarres2	Socs2;Agt;Apoa1;Rbp4;Nrep;Ahsg;Ache;Apoe	Syne1;Prkcb;Plk2;Lrrc17;Egr1;Mef2c;Plcb1;Dkkl1;Fezf2;C1qbp;Tbr1;Cdkl5	Oxtr;Fdps
GO:0045595	regulation of cell differentiation	BP	806	0.482412	0.635998	0.000907636	0.870459	Mif;Lpl;Apcs;Rarres2;Rbp1;Fdps	Ache;Socs2;Nrep;Apoe;Apoa1	Plk2;Fezf2;Lrrc17;Cdkl5;Mef2c;C1qbp;Plcb1;Syne1;Dkkl1;Tbr1	Fdps
GO:0010557	positive regulation of macromolecule biosynthetic process	BP	851	0.988476	0.715114	0.000750389	0.886542	Zpr1;Rps27l	Apoa2;Dbp;Agt;Ramp1;Rps27l	Nr4a1;Mef2c;Egr1;C1qbp;Upf3a;Tbr1;Npas4;Camk4;Fezf2;Plcb1	Tnni2
GO:0044822	poly(A) RNA binding	MF	994	2.1292e-06	0.575228	0.283636	0.924667	Rbm7;Fdps;Rpl26;Rps16;Rsl1d1;Ppib;Rps27l;Nop56;Fau;Rps15;Rps17;Rps18;Rps5;Rps23;Rpl17;Rps24;Pcsk9;Utp14a;Ass1;Rps25;Rps11;Rps6;Rps14	Mrps21;Rps27l;H2-Q10;Ddx1;Mrpl42;Tfrc;Rpl7a	Upf3a;Ppan;Rpl37a;Syne1;C1qbp	Fdps
GO:0003723	RNA binding	MF	1254	8.90559e-06	0.807544	0.161109	0.962926	Rps17;Utp14a;Rbm7;Rps23;Rps15;Rps14;Cpsf3;Rps24;Rpl17;Rps27l;Ass1;Rpl26;Rps6;Rps11;Rps18;Rps16;Fau;Pcsk9;Rps5;Ppib;Rps4x;Rps25;Rsl1d1;Nop56;Fdps	Mrps21;Ddx1;Rps27l;H2-Q10;Tfrc;Mrpl42;Rpl7a	Syne1;Upf3a;Ppan;C1qbp;Actn1;Rpl37a;Mef2c	Fdps
GO:0032991	macromolecular complex	CC	3061	0.000603462	0.0801636	0.816398	0.998125	Ndufa4;Rps14;Rps6;Upp2;Rps5;Rps17;C8b;Tceb1;Gstp1;Rps23;Utp14a;Rps24;Rps18;Shfm1;Rps4x;Rps11;Rps16;Cpsf3;Rpl26;Zpr1;Rps25;Vti1b;Fau;Rpl17;Apcs;Nop56;Nupl1;Ndufa2;Cwc15;Atp6v0d2;Ndufs8;Rpl32;Rps15;Rps27l;Lpl;Sdhb;Gstp2	Prkag3;Ddx1;H2-Q10;Apoe;Apoc1;Mrps21;Pfdn1;Apoa2;Actc1;Mrpl34;Ramp1;Ndufc2;Rpl7a;Rps29;Aqp4;Ndufa3;Dad1;Mrpl42;Ttr;Apoa1;Itgb6;Ndufc1;Kcnc4;Alb;Rps27l;Ahsg;Ndufs6;Rbp4	Btbd1;Syne1;Mef2c;Plcb1;Npas4;Rpl37a;Vipr1;Upf3a;Nr4a1	Atp1a3;Tnni2
GO:0000028	ribosomal small subunit assembly	BP	12	4.82447e-07	1	1	1	Rps25;Rps17;Rps15;Rps14
GO:0002374	cytokine secretion involved in immune response	BP	6	1	0.000305197	1	1		Apoa1;Apoa2
GO:0002573	myeloid leukocyte differentiation	BP	105	0.178913	0.51354	0.000472034	1	Rbp1;Apcs	Tfrc	Mef2c;Camk4;Plcb1;Lrrc17
GO:0002739	regulation of cytokine secretion involved in immune response	BP	6	1	0.000305197	1	1		Apoa1;Apoa2
GO:0002740	negative regulation of cytokine secretion involved in immune response	BP	4	1	5.13451e-05	1	1		Apoa1;Apoa2
GO:0003735	structural constituent of ribosome	MF	122	9.86894e-16	0.0102827	0.345829	1	Fau;Rps16;Rps6;Rps25;Rps14;Rps18;Rps11;Rps27l;Rps17;Rps24;Rpl32;Rpl17;Rps4x;Rps23;Rps5;Rps15	Mrps21;Mrpl34;Rps27l;Rps29	Rpl37a
GO:0004364	glutathione transferase activity	MF	23	1.8841e-05	1	1	1	Gsta4;Gstp1;Gstp2;Gstm6
GO:0004497	monooxygenase activity	MF	72	1.20088e-06	0.231481	1	1	Cyp2c44;Cyp2c68;Cyp3a11;Cyp2c67;Fmo3;Cyp2c70;Cyp2j9;Cyp2c54	Cyp2e1
GO:0004857	enzyme inhibitor activity	MF	155	0.00899832	0.000541057	1	1	Kng1;Serpina6;Serpina1e;Fetub;Mug2	Apoa1;Ppp1r1a;Serpina1b;Ahsg;Agt;Apoa2
GO:0004866	endopeptidase inhibitor activity	MF	64	0.000250777	0.00534819	1	1	Fetub;Mug2;Serpina6;Kng1;Serpina1e	Agt;Ahsg;Serpina1b
GO:0005198	structural molecule activity	MF	279	1.72581e-10	0.143611	0.268762	1	Rps6;Rps24;Rpl32;Rps25;Rps23;Rps5;Rpl17;Rps11;Rps27l;Rps15;Rps17;Rps4x;Rps16;Fau;Rps14;Rps18	Mrps21;Rps27l;Rps29;Mrpl34	Homer1;Rpl37a
GO:0005319	lipid transporter activity	MF	45	1	7.9245e-05	0.143979	1		Apoe;Apoa1;Rbp4;Apoa2	Ano3
GO:0005521	lamin binding	MF	11	1	1	0.000448537	1			Plcb1;Syne1
GO:0005615	extracellular space	CC	536	1.02067e-05	1.78738e-09	0.258112	1	Pcsk9;Lpl;Apcs;Igfbp1;Cpb2;Serpina6;C8b;Serpina1e;Gstp2;Gstp1;Fetub;Fau;Mif;Kng1;Mug2	Prkag3;Ramp1;Apoa1;Agt;Fmod;Apoa2;Apoe;Rbp4;Ahsg;Ache;Vtn;Apoc1;Dkk3;Tfrc;Alb;Ttr;Actc1;Ppp1r1a;Serpina1b	Actn1;C1qbp;Lrrc17
GO:0005746	mitochondrial respiratory chain	CC	51	3.60509e-05	2.92862e-05	1	1	Sdhb;Ndufa2;Ndufs8;Cox7a2;Ndufa4	Cox7a2;Ndufc2;Ndufa3;Ndufc1;Ndufs6
GO:0005747	mitochondrial respiratory chain complex I	CC	37	0.0307392	0.000110283	1	1	Ndufa2;Ndufs8	Ndufs6;Ndufc2;Ndufa3;Ndufc1
GO:0005840	ribosome	CC	184	3.16691e-14	0.00209522	0.465954	1	Rps24;Rpl17;Rps11;Rps18;Rps17;Rps23;Rps5;Rps15;Rps6;Rps4x;Rpl26;Rps14;Rpl32;Rps16;Rps27l;Fau;Rps25	Rps29;Rpl7a;Mrpl42;Mrpl34;Mrps21;Rps27l	Rpl37a
GO:0006364	rRNA processing	BP	109	2.33926e-05	1	1	1	Rps6;Rps24;Utp14a;Rps17;Rpl26;Rps16;Rps15
GO:0006412	translation	BP	383	1.31253e-06	0.288923	0.15014	1	Rps6;Rps27l;Rps4x;Rps18;Rpl17;Rps24;Rps5;Rps23;Rps16;Rps15;Rps14;Rpl32;Rps11;Rps17	Rps27l;Mrps21;Mrpl34;Rps29	Rpl37a;C1qbp;Upf3a
GO:0006638	neutral lipid metabolic process	BP	68	0.104494	3.79645e-06	1	1	Pcsk9;Lpl	Cyp2e1;Apoa2;Apoe;Apoc1;Slc37a4;Thrsp
GO:0006639	acylglycerol metabolic process	BP	68	0.104494	3.79645e-06	1	1	Pcsk9;Lpl	Apoc1;Thrsp;Apoa2;Slc37a4;Apoe;Cyp2e1
GO:0006641	triglyceride metabolic process	BP	60	0.0894175	3.07978e-05	1	1	Lpl;Pcsk9	Apoc1;Thrsp;Apoe;Slc37a4;Cyp2e1
GO:0006898	receptor-mediated endocytosis	BP	95	0.483179	0.000539072	0.303569	1	Pcsk9	Apoe;Ramp1;Tfrc;Vtn;Ache	Syne1
GO:0007519	skeletal muscle tissue development	BP	114	1	1	3.74578e-05	1			Plcb1;Mef2c;Egr1;Nr4a1;Homer1
GO:0008035	high-density lipoprotein particle binding	MF	7	1	0.000514351	1	1		Apoa2;Apoa1
GO:0009055	electron carrier activity	MF	48	0.000539291	0.0439634	1	1	Ndufa4;Aox3;Cox7a2;Sdhb	Cox6b1;Cox7a2
GO:0010092	specification of organ identity	BP	15	1	1	0.000904482	1			Tbr1;Mef2c
GO:0010872	regulation of cholesterol esterification	BP	10	1	8.57283e-08	1	1		Apoa2;Apoe;Apoa1;Agt
GO:0010873	positive regulation of cholesterol esterification	BP	8	1	3.6942e-08	1	1		Agt;Apoe;Apoa1;Apoa2
GO:0010901	regulation of very-low-density lipoprotein particle remodeling	BP	4	1	5.13451e-05	1	1		Apoa2;Apoa1
GO:0010903	negative regulation of very-low-density lipoprotein particle remodeling	BP	4	1	5.13451e-05	1	1		Apoa1;Apoa2
GO:0014904	myotube cell development	BP	43	1	1	0.000411642	1			Plcb1;Homer1;Mef2c
GO:0015248	sterol transporter activity	MF	8	1	1.46771e-06	1	1		Apoe;Apoa2;Apoa1
GO:0015748	organophosphate ester transport	BP	48	1	0.000187006	0.151836	1		Slc37a4;Apoe;Apoa1;Apoa2	Ano3
GO:0015914	phospholipid transport	BP	32	1	0.000831163	0.10913	1		Apoa1;Apoa2;Apoe	Ano3
GO:0015935	small ribosomal subunit	CC	64	6.93059e-16	0.00952119	1	1	Rps25;Rps23;Rps5;Rps4x;Rps6;Rps16;Rps18;Rps24;Rps11;Fau;Rps15;Rps17;Rps14	Mrps21;Mrpl42;Rps29
GO:0016072	rRNA metabolic process	BP	112	2.8e-05	1	1	1	Rps24;Rps6;Utp14a;Rpl26;Rps17;Rps15;Rps16
GO:0016597	amino acid binding	MF	80	0.000370571	1	1	1	Gstp2;Ass1;Gsta4;Gstp1;Fmo3
GO:0017127	cholesterol transporter activity	MF	8	1	1.46771e-06	1	1		Apoe;Apoa1;Apoa2
GO:0018158	protein oxidation	BP	6	1	0.000305197	1	1		Apoa2;Apoa1
GO:0018206	peptidyl-methionine modification	BP	5	1	0.000153315	1	1		Apoa2;Apoa1
GO:0021877	forebrain neuron fate commitment	BP	12	1	1	0.000904482	1			Fezf2;Tbr1
GO:0021902	commitment of neuronal cell to specific neuron type in forebrain	BP	7	1	1	0.000246765	1			Fezf2;Tbr1
GO:0022613	ribonucleoprotein complex biogenesis	BP	229	1.86145e-06	1	0.549842	1	Nop56;Rps24;Rpl26;Rps17;Rps18;Rps6;Rps15;Rps16;Utp14a;Rps14;Rps25		C1qbp
GO:0022626	cytosolic ribosome	CC	84	3.06174e-17	0.121593	0.242381	1	Rps6;Rps18;Rps16;Rps17;Rps23;Rpl26;Rps14;Rps25;Rps24;Rps5;Rpl17;Rpl32;Fau;Rps11;Rps15	Rpl7a;Rps29	Rpl37a
GO:0022627	cytosolic small ribosomal subunit	CC	41	5.26012e-17	0.24166	1	1	Rps5;Rps6;Rps17;Rps14;Rps24;Rps11;Fau;Rps25;Rps23;Rps16;Rps18;Rps15	Rps29
GO:0030258	lipid modification	BP	117	1	0.000142096	1	1		Ehhadh;Apoa1;Apoe;Phyh;Apoa2;Agt
GO:0030299	intestinal cholesterol absorption	BP	6	1	0.000305197	1	1		Apoa2;Apoa1
GO:0030300	regulation of intestinal cholesterol absorption	BP	5	1	0.000153315	1	1		Apoa2;Apoa1
GO:0030414	peptidase inhibitor activity	MF	65	0.000250777	0.00598295	1	1	Serpina6;Fetub;Serpina1e;Kng1;Mug2	Ahsg;Serpina1b;Agt
GO:0030529	ribonucleoprotein complex	CC	508	2.11872e-10	0.0779922	0.524394	1	Rps24;Nop56;Rps25;Cwc15;Rps15;Rpl26;Rps4x;Rps17;Rpl17;Rps18;Rps6;Rpl32;Utp14a;Rps5;Rps23;Rps16;Rps11;Rps14;Fau;Rps27l;Cpsf3	Mrps21;Rps29;Ddx1;Mrpl42;Mrpl34;Rps27l;Rpl7a	Btbd1;Rpl37a
GO:0030964	NADH dehydrogenase complex	CC	37	0.0307392	0.000110283	1	1	Ndufa2;Ndufs8	Ndufa3;Ndufs6;Ndufc1;Ndufc2
GO:0032371	regulation of sterol transport	BP	20	1	0.000271878	1	1		Apoa1;Apoa2;Apoe
GO:0032372	negative regulation of sterol transport	BP	7	1	0.000506285	1	1		Apoa2;Apoe
GO:0032374	regulation of cholesterol transport	BP	20	1	0.000271878	1	1		Apoa2;Apoa1;Apoe
GO:0032375	negative regulation of cholesterol transport	BP	7	1	0.000506285	1	1		Apoa2;Apoe
GO:0032488	Cdc42 protein signal transduction	BP	5	1	0.000153315	1	1		Apoa1;Apoe
GO:0032691	negative regulation of interleukin-1 beta production	BP	7	0.0319433	0.000755881	1	1	Gstp1	Aqp4;Apoa1
GO:0032870	cellular response to hormone stimulus	BP	212	0.488464	0.420072	0.000948634	1	Pcsk9;Rarres2	Socs2;Ahsg	Mef2c;Prkcb;Egr1;Plcb1;Nr4a1
GO:0032994	protein-lipid complex	CC	25	0.229447	7.96209e-06	1	1	Lpl	Apoe;Apoa2;Apoa1;Apoc1
GO:0033344	cholesterol efflux	BP	25	1	0.00050259	1	1		Apoa1;Apoe;Apoa2
GO:0033700	phospholipid efflux	BP	8	1	7.09159e-06	1	1		Apoe;Apoa2;Apoa1
GO:0034103	regulation of tissue remodeling	BP	34	1	0.00093024	1	1		Agt;Tfrc;Ahsg
GO:0034190	apolipoprotein receptor binding	MF	5	0.0326149	0.000155769	1	1	Pcsk9	Apoa1;Apoa2
GO:0034358	plasma lipoprotein particle	CC	23	0.216772	4.78928e-06	1	1	Lpl	Apoe;Apoa2;Apoa1;Apoc1
GO:0034361	very-low-density lipoprotein particle	CC	13	0.114915	3.44912e-07	1	1	Lpl	Apoe;Apoa1;Apoa2;Apoc1
GO:0034364	high-density lipoprotein particle	CC	13	1	2.15129e-05	1	1		Apoa1;Apoa2;Apoe
GO:0034365	discoidal high-density lipoprotein particle	CC	4	1	5.45369e-05	1	1		Apoa1;Apoe
GO:0034366	spherical high-density lipoprotein particle	CC	4	1	0.000162821	1	1		Apoa1;Apoa2
GO:0034367	macromolecular complex remodeling	BP	13	0.107461	1.96513e-05	1	1	Lpl	Apoa1;Apoa2;Apoe
GO:0034368	protein-lipid complex remodeling	BP	13	0.107461	1.96513e-05	1	1	Lpl	Apoa1;Apoe;Apoa2
GO:0034369	plasma lipoprotein particle remodeling	BP	13	0.107461	1.96513e-05	1	1	Lpl	Apoe;Apoa2;Apoa1
GO:0034370	triglyceride-rich lipoprotein particle remodeling	BP	8	0.0704591	3.56427e-06	1	1	Lpl	Apoa2;Apoe;Apoa1
GO:0034372	very-low-density lipoprotein particle remodeling	BP	8	0.062879	1.43314e-06	1	1	Lpl	Apoa2;Apoe;Apoa1
GO:0034374	low-density lipoprotein particle remodeling	BP	6	1	0.000153315	1	1		Apoe;Apoa2
GO:0034375	high-density lipoprotein particle remodeling	BP	7	1	0.000305197	1	1		Apoa2;Apoe
GO:0034377	plasma lipoprotein particle assembly	BP	13	1	4.1675e-05	1	1		Apoe;Apoa2;Apoa1
GO:0034380	high-density lipoprotein particle assembly	BP	9	1	7.09159e-06	1	1		Apoa2;Apoa1;Apoe
GO:0034384	high-density lipoprotein particle clearance	BP	5	1	0.000153315	1	1		Apoa2;Apoe
GO:0034385	triglyceride-rich lipoprotein particle	CC	13	0.114915	3.44912e-07	1	1	Lpl	Apoc1;Apoa2;Apoe;Apoa1
GO:0034433	steroid esterification	BP	12	1	8.57283e-08	1	1		Agt;Apoe;Apoa1;Apoa2
GO:0034434	sterol esterification	BP	12	1	8.57283e-08	1	1		Apoe;Apoa2;Agt;Apoa1
GO:0034435	cholesterol esterification	BP	12	1	8.57283e-08	1	1		Apoa1;Agt;Apoe;Apoa2
GO:0035376	sterol import	BP	7	1	0.000506285	1	1		Apoa2;Apoa1
GO:0035382	sterol transmembrane transport	BP	7	1	0.000506285	1	1		Apoa2;Apoa1
GO:0035730	S-nitrosoglutathione binding	MF	4	6.72748e-05	1	1	1	Gstp1;Gstp2
GO:0035731	dinitrosyl-iron complex binding	MF	4	6.72748e-05	1	1	1	Gstp2;Gstp1
GO:0035914	skeletal muscle cell differentiation	BP	44	1	1	0.000472605	1			Egr1;Mef2c;Nr4a1
GO:0042254	ribosome biogenesis	BP	157	3.70467e-08	1	0.414363	1	Rps17;Nop56;Rpl26;Rps14;Rps15;Utp14a;Rps18;Rps24;Rps16;Rps25;Rps6		C1qbp
GO:0042255	ribosome assembly	BP	21	1.39564e-05	1	0.0643294	1	Rps25;Rps14;Rps17;Rps15		C1qbp
GO:0042274	ribosomal small subunit biogenesis	BP	28	5.3062e-10	1	1	1	Rps6;Rps16;Rps24;Rps17;Rps25;Rps15;Rps14
GO:0042627	chylomicron	CC	8	0.0706038	0.000324073	1	1	Lpl	Apoa2;Apoe
GO:0042632	cholesterol homeostasis	BP	46	0.33962	0.000123184	1	1	Pcsk9	Apoa2;Apoe;Slc37a4;Apoa1
GO:0043178	alcohol binding	MF	45	0.294509	4.83701e-06	1	1	Rbp1	Apoa2;Apoa1;Adh1;Rbp4;Ache
GO:0043295	glutathione binding	MF	18	0.000184535	1	1	1	Gstp1;Gstp2;Gsta4
GO:0043508	negative regulation of JUN kinase activity	BP	10	0.00063479	1	1	1	Gstp1;Hipk3
GO:0043691	reverse cholesterol transport	BP	10	1	7.09159e-06	1	1		Apoa1;Apoe;Apoa2
GO:0044241	lipid digestion	BP	7	1	0.000506285	1	1		Apoa2;Apoa1
GO:0044391	ribosomal subunit	CC	127	1.27876e-15	0.00209159	0.343335	1	Rps18;Rps17;Rps5;Rpl17;Rps25;Fau;Rps6;Rps23;Rpl32;Rpl26;Rps11;Rps4x;Rps14;Rps15;Rps24;Rps16	Rps29;Rpl7a;Mrpl42;Mrps21;Mrpl34	Rpl37a
GO:0044445	cytosolic part	CC	156	4.39666e-13	0.312497	0.412896	1	Rps15;Rpl26;Rps24;Rps23;Rps14;Rps17;Rps18;Rps5;Rps6;Fau;Rpl32;Rps25;Rps11;Rps16;Rpl17	Rps29;Rpl7a	Rpl37a
GO:0045271	respiratory chain complex I	CC	37	0.0307392	0.000110283	1	1	Ndufa2;Ndufs8	Ndufc2;Ndufc1;Ndufa3;Ndufs6
GO:0045663	positive regulation of myoblast differentiation	BP	14	1	1	0.000767023	1			Plcb1;Mef2c
GO:0046486	glycerolipid metabolic process	BP	179	0.420599	0.000184063	1	1	Lpl;Pcsk9	Slc37a4;Thrsp;Apoa1;Apoc1;Apoa2;Cyp2e1;Apoe
GO:0048741	skeletal muscle fiber development	BP	41	1	1	0.000355986	1			Mef2c;Homer1;Plcb1
GO:0048747	muscle fiber development	BP	55	1	1	0.000911642	1			Homer1;Plcb1;Mef2c
GO:0055092	sterol homeostasis	BP	47	0.344986	0.000137366	1	1	Pcsk9	Apoa2;Slc37a4;Apoe;Apoa1
GO:0055102	lipase inhibitor activity	MF	8	1	0.000767896	1	1		Apoa1;Apoa2
GO:0060228	phosphatidylcholine-sterol O-acyltransferase activator activity	MF	6	1	3.68855e-07	1	1		Apoe;Apoa1;Apoa2
GO:0060352	cell adhesion molecule production	BP	4	1	0.000153315	1	1		Aqp4;Apoa1
GO:0060353	regulation of cell adhesion molecule production	BP	3	1	5.13451e-05	1	1		Apoa1;Aqp4
GO:0060354	negative regulation of cell adhesion molecule production	BP	3	1	5.13451e-05	1	1		Apoa1;Aqp4
GO:0060538	skeletal muscle organ development	BP	117	1	1	4.44732e-05	1			Mef2c;Nr4a1;Homer1;Egr1;Plcb1
GO:0061134	peptidase regulator activity	MF	92	9.96204e-05	0.00222286	1	1	Rps27l;Serpina1e;Fetub;Serpina6;Mug2;Kng1	Ahsg;Rps27l;Serpina1b;Agt
GO:0061135	endopeptidase regulator activity	MF	70	0.000348094	0.00738305	1	1	Fetub;Serpina1e;Kng1;Serpina6;Mug2	Ahsg;Agt;Serpina1b
GO:0065005	protein-lipid complex assembly	BP	16	1	7.56154e-05	1	1		Apoa2;Apoa1;Apoe
GO:0070325	lipoprotein particle receptor binding	MF	16	0.124288	0.000100113	1	1	Pcsk9	Apoa2;Apoe;Apoa1
GO:0070330	aromatase activity	MF	26	0.000966869	1	1	1	Cyp2c54;Cyp3a11;Cyp2c70
GO:0070469	respiratory chain	CC	58	6.49354e-05	2.98757e-06	1	1	Sdhb;Ndufa2;Cox7a2;Ndufs8;Ndufa4	Ndufs6;Cox7a2;Ndufc2;Ndufa3;Ndufs5;Ndufc1
GO:0070498	interleukin-1-mediated signaling pathway	BP	10	1	1	0.000421159	1			Plcb1;Egr1
GO:0070508	cholesterol import	BP	7	1	0.000506285	1	1		Apoa1;Apoa2
GO:0070653	high-density lipoprotein particle receptor binding	MF	4	1	5.2169e-05	1	1		Apoa2;Apoa1
GO:0071813	lipoprotein particle binding	MF	20	0.145832	0.00023311	1	1	Pcsk9	Apoe;Apoa1;Apoa2
GO:0071814	protein-lipid complex binding	MF	20	0.145832	0.00023311	1	1	Pcsk9	Apoa2;Apoa1;Apoe
GO:0071825	protein-lipid complex subunit organization	BP	22	0.170437	0.000227741	1	1	Lpl	Apoe;Apoa2;Apoa1
GO:0071827	plasma lipoprotein particle organization	BP	20	0.156833	0.000153973	1	1	Lpl	Apoe;Apoa2;Apoa1
GO:0072562	blood microparticle	CC	77	0.150865	8.35846e-10	1	1	Kng1;Apcs	Vtn;Agt;Actc1;Ahsg;Alb;Apoa2;Apoa1;Tfrc;Apoe
GO:0097057	TRAF2-GSTP1 complex	CC	4	6.4774e-05	1	1	1	Gstp2;Gstp1
GO:1900750	oligopeptide binding	MF	18	0.000184535	1	1	1	Gstp1;Gsta4;Gstp2
GO:1903037	regulation of leukocyte cell-cell adhesion	BP	7	0.00063479	1	1	1	Ass1;Gstp1
GO:1903038	negative regulation of leukocyte cell-cell adhesion	BP	6	0.000382882	1	1	1	Gstp1;Ass1
