# Supplementary material for: Common and unique transcriptional responses to dietary restriction and loss of insulin receptor substrate 1 (IRS1) in mice
Source: Aging (Albany NY). 2018 May 20;10(5):1027–52. doi: 10.18632/aging.101446 (PMC5990393; doi:10.18632/aging.101446)
Supplement: Supplementary Table S6 [file aging-10-101446-s007.xlsx]

## Sheet: GO_DR_down.txt
GO ID	GO Term	GO Category	Total Genes	WAT WTDR DOWN	BRAIN WTDR DOWN	SM WTDR DOWN	LIVER WTDR DOWN	WAT WTDR DOWN Genes	BRAIN WTDR DOWN Genes	SM WTDR DOWN Genes	LIVER WTDR DOWN Genes
GO:1901187	regulation of ephrin receptor signaling pathway	BP	5	1	1	1	0.000291868				Notch1;Anks1
GO:0006955	immune response	BP	440	0.446289	0.2428	0.0767636	0.000335846	Ccl6;Slc11a1	H2-D1;Cited1;Isg15;Bst2	H2-Eb1;Syk;Trim12c;Ighd;Cd79b;H2-Ab1;Cxcl13;Lcp1;H2-Aa;Icosl;Gbp6	Sbno2;Ighm;Apoa4;Ifit1;Vnn1;Notch1;Isg15;Rsad2;Oasl1;Tlr12;Nrros;Axl;Gadd45g
GO:0046461	neutral lipid catabolic process	BP	14	1	1	0.161753	0.000486255			Lpl	Mgll;Apoa4;Plin5
GO:0046464	acylglycerol catabolic process	BP	14	1	1	0.161753	0.000486255			Lpl	Mgll;Apoa4;Plin5
GO:0045087	innate immune response	BP	227	0.532987	0.118121	0.128972	0.000531035	Slc11a1	Bst2;Cited1;Isg15	H2-Eb1;H2-Aa;Trim12c;H2-Ab1;Gbp6;Syk	Ifit1;Axl;Isg15;Vnn1;Tlr12;Rsad2;Oasl1;Nrros;Apoa4
GO:0006638	neutral lipid metabolic process	BP	68	1	1	0.2759	0.000557264			Cat;Lpl	Plin5;Lpin1;Mgll;Sik1;Apoa4
GO:0006639	acylglycerol metabolic process	BP	68	1	1	0.2759	0.000557264			Cat;Lpl	Lpin1;Sik1;Plin5;Apoa4;Mgll
GO:0090209	negative regulation of triglyceride metabolic process	BP	5	1	1	1	0.000579948				Sik1;Plin5
GO:0015291	secondary active transmembrane transporter activity	MF	75	0.205503	1	0.700611	0.000728252	Slc11a1		Slc9a1	Slc22a5;Mfsd2a;Slc9a1;Slc12a7;Slc36a1
GO:0048534	hematopoietic or lymphoid organ development	BP	455	0.776942	0.345329	0.232499	0.000771858	Ercc2	Fzd9;Ret;Isg15;Anln	Zbtb16;Cxcl13;Zfp36l1;Cebpd;Syk;H2-Aa;Lep;Igkc;Adipoq;H2-Ab1	Rsad2;Vnn1;Notch1;Lrp5;Axl;Mafb;Sbno2;Isg15;Gadd45g;Hist1h4i;Sirpa;Crip2
GO:0006952	defense response	BP	485	0.817253	0.335978	0.000604396	0.000905961	Slc11a1	Bst2;Agt;Cited1;Isg15	Ddit4;Hp;Syk;Serpine1;Gbp6;Adipoq;Adamts5;Aoc3;Rnasel;Trim12c;Optn;H2-Ab1;Cxcl13;H2-Eb1;Serpina3n;Acp5;H2-Aa;Thbs1	Sbno2;Vnn1;Apoa4;Rsad2;Isg15;Nrros;Ighm;Axl;Notch1;Tlr12;Mgll;Ifit1;Oasl1
GO:0035457	cellular response to interferon-alpha	BP	7	1	1	1	0.000960312				Ifit1;Axl
GO:0042074	cell migration involved in gastrulation	BP	8	1	1	1	0.000960312				Lrp5;Megf8
GO:0048523	negative regulation of cellular process	BP	2089	0.172637	0.172458	0.000213986	0.00203789	Sema3f;Gpc1;Adm;Sfrp5;Wisp2;Mt1;Peg10;Pdk4;Dock8	Rbm38;Glra1;Phlda3;Limk1;Tsc22d3;Cited1;Efna1;Bst2;Sfrp5;Olig2;Wnt3;Agt;Spp1;Isg15;Arhgap24;Rnd1;Cdkn1a;Ldoc1;Cyp26b1	Anxa4;Zbtb16;Adipoq;Lmod2;Zeb2;Btg1;Prmt2;Coro1a;Thbs1;Hp;Xirp1;Slc9a1;Map4k4;Rnasel;Htra3;H2-Aa;Angptl4;Ddit4;Dlc1;Eid1;Sptbn1;Sfrp5;Igfbp3;Lep;Ankrd2;Wwtr1;Ntrk2;App;Tgif1;Hspa1b;Acp5;Gnai1;Ctnna1;H2-Ab1;Fam129a;Wisp2;Atp1a1;Yy1;Cat;Apcdd1;Nipbl;Prkar2b;Sparc;Prkcdbp;Optn;Npr3;Pdk4;Pmepa1;Cebpd;Slit3;Cxcl13;Kirrel;Serpine1;Arntl	Rsad2;Zbtb38;Tsc22d1;Pim1;Plin5;Oasl1;Hk1;Slc9a1;Sbno2;Apoa4;Mafb;Axl;Lrp5;Cda;Mgll;Hist1h4i;Mypop;Bahd1;Rreb1;Notch1;Sik1;Mmrn2;Gadd45g;Cbx4;Vnn1;Lpin1;Rita1;Isg15;Tsku;Cdkn1a;Anks1
GO:0072593	reactive oxygen species metabolic process	BP	106	0.293897	0.138885	4.74393e-06	0.00327401	Pdk4	Agt;Cdkn1a	Thbs1;Fbln5;Acp5;Cat;Pdk4;Sod3;Ddit4;Lep;Syk;Hp	Sh3pxd2a;Nrros;Plin5;Apoa4;Cdkn1a
GO:0048519	negative regulation of biological process	BP	2276	0.0709171	0.202363	4.74144e-05	0.00737032	Mt1;Sfrp5;Sema3f;Gpc1;Dock8;Thbs2;Wisp2;Adm;Slc11a1;Peg10;Pdk4	Efna1;Agt;Sfrp5;Bst2;Cited1;Spp1;Tsc22d3;Glra1;Olig2;Pomc;Wnt3;Rnd1;Limk1;Rbm38;Cdkn1a;Ldoc1;Arhgap24;Cyp26b1;Isg15;Phlda3	Anxa4;Tgif1;Oxtr;Coro1a;Lep;Yy1;Zbtb16;Dlc1;Sptbn1;Sparc;Sfrp5;Ntrk2;Eid1;Hspa1b;Fam129a;Serpine1;H2-Ob;Adipoq;Gnai1;Prmt2;Btg1;Smtnl1;Cxcl13;Thbs1;Rnasel;Slc9a1;Igfbp3;Il6ra;Hp;Htra3;Ankrd2;Xirp1;Thbs2;Wisp2;Apcdd1;H2-Ab1;Atp2a2;H2-Aa;Nipbl;Ddit4;Pmepa1;Optn;Acp5;Zeb2;Npr3;Kirrel;Ctnna1;Angptl4;Atp1a1;App;Lmod2;Arntl;Map4k4;Wwtr1;Prkcdbp;Pdk4;Cebpd;Slit3;Cat;Prkar2b	Sbno2;Apoa4;Rita1;Rsad2;Mafb;Sik1;Notch1;Mmrn2;Cbx4;Plin5;Slc9a1;Bahd1;Gadd45g;Hk1;Mgll;Cda;Vnn1;Lrp5;Zbtb38;Oasl1;Pim1;Mypop;Lpin1;Tsku;Tsc22d1;Cdkn1a;Hist1h4i;Isg15;Anks1;Axl;Rreb1
GO:0048513	organ development	BP	1483	0.157557	0.00911119	1.20586e-05	0.0140411	Adap2;Sfrp5;Sema3f;Alg10b;Ercc2;Peg10;Adm	Isg15;Th;Cyp26b1;Sfrp5;Lhx5;Efna1;Tsc22d3;Akr1b3;Adamts2;Dmp1;Lrig1;Olig2;Fzd9;Ret;Spp1;Cited1;Wnt3;Agt;Anln	H2-Aa;Nipbl;Syk;Adipoq;Zfp36l1;Cebpd;Thbs1;Bcar3;Xirp1;Wwtr1;Zbtb16;Sfrp5;Apcdd1;Lep;Tgif1;Serpine1;Csrp3;Hp;Smtnl1;Myh7;Igfbp3;Slit3;Maff;Btg1;Ddit4;Parva;Arntl;Zeb2;Smoc1;Anxa4;Ankrd2;Il6ra;Myh6;Cxcl13;Ntrk2;Sparc;App;Igkc;Yy1;Dlc1;Nid1;H2-Ab1;Lox;Cat;Slc9a1;Acp5	Sirpa;Crip2;Sbno2;Isg15;Celsr1;Lrp5;Slc25a25;Notch1;Axl;Nrp2;Mafb;Tsku;Megf8;Rsad2;Slc22a5;Gadd45g;Hist1h4i;Fam83h;Sik1;Vnn1;Slc9a1
GO:0002696	positive regulation of leukocyte activation	BP	113	1	0.51681	0.00052149	0.0174418		Cdkn1a	Coro1a;Icosl;H2-Ab1;Zbtb16;Thbs1;Ighd;H2-Aa;Syk	Cdkn1a;Vnn1;Axl;Ighm
GO:0048731	system development	BP	2039	0.0321383	0.00748228	6.39652e-07	0.0178168	Sfrp5;Sema3f;Thbs2;Palld;Adm;Peg10;Adap2;Ercc2;Trpv2;Alg10b;Gpc1	Olig2;Hapln2;Wnt3;Ret;Sfrp5;Lhx5;Cldn11;Cited1;Fzd9;Tsc22d3;Rnd1;Th;Isg15;Lrig1;Limk1;Akr1b3;Agt;Klk6;Cyp26b1;Anln;Efna1;Dmp1;Adamts2;Arhgap24;Spp1	Lep;Slit3;Tgif1;Smoc1;Csrp3;H2-Ab1;Zbtb16;Ntrk2;Il6ra;Sfrp5;Ighd;Zeb2;Thbs1;Npr3;Nipbl;Ankrd2;Xirp1;Mfge8;Parva;Thbs2;Smtnl1;Ctnna1;Yy1;Hp;Serpine1;Apcdd1;Ndrg1;Tnfrsf12a;Anxa4;Angptl4;Dlc1;Adipoq;Cebpd;Bcar3;Btg1;App;Maff;Zfp36l1;Cat;Igfbp3;Ddit4;H2-Aa;Sparc;Ablim1;Igkc;Acp5;Wwtr1;Oxtr;Map4k4;Icosl;Syk;Lox;Dmrt2;Myh7;Cxcl13;Myh6;Nid1;Arntl;Mbp;Slc9a1	Lrp5;Sirpa;Nrp2;Tsku;Mmrn2;Isg15;Notch1;Celsr1;Clstn3;Rsad2;Slc25a25;Crip2;Sbno2;Rita1;Mgll;Megf8;Mafb;Sik1;Gadd45g;Fam83h;Slc22a5;Vnn1;Axl;Ncmap;Slc9a1;Hist1h4i
GO:0050867	positive regulation of cell activation	BP	118	1	0.536393	0.000135638	0.0198515		Cdkn1a	Syk;H2-Ab1;Zbtb16;Icosl;H2-Aa;Ighd;Lep;Coro1a;Thbs1	Axl;Vnn1;Cdkn1a;Ighm
GO:0044057	regulation of system process	BP	212	0.453704	0.0906177	0.000162911	0.0204814	Adm	Glra1;Pomc;Th;Agt	Trim63;Lep;Atp1a1;Atp2a2;Fbxo32;Slc9a1;Adipoq;Myh6;Smtnl1;Oxtr;Csrp3;Myh7	Mgll;Slc9a1;Ncmap;Slc22a5;Apoa4
GO:0098542	defense response to other organism	BP	166	0.417398	0.204113	0.000166334	0.0225426	Slc11a1	Isg15;Bst2	Gbp6;Syk;Hp;Cxcl13;Ddit4;Rnasel;Acp5;Serpine1;Adamts5;Optn	Isg15;Ifit1;Rsad2;Ighm;Oasl1
GO:0071944	cell periphery	CC	2021	0.0617885	0.010989	7.34636e-08	0.0259678	Sfrp5;Wisp2;Slco3a1;Slc11a1;Ehd3;Trpv2;Alg10b;Gpc1;Sorbs2;Adap2	Rhog;Glra1;Sfrp5;Th;Cpm;Efna1;Slc29a4;H2-D1;Fzd9;Epn3;Cldn11;Phlda3;Ret;Kcng4;Cabp7;Tanc1;Rnd1;Dio3;Mrap2;Arrdc2;Gjc2;Gjb1;Anln;Bst2;Hspa1a	Oxtr;Erbb2ip;Parva;Sfrp5;Lpl;App;H2-Ob;Cd79b;Apcdd1;Prkcdbp;Tpm3;Wisp2;Smurf2;Ctnna1;Sorbs1;Pmepa1;Dstn;Eltd1;Ntrk2;Plin4;Lcp1;Dlc1;Tpm4;Cdc42ep1;Mbp;Ighd;Atp2a2;Il6ra;Aoc3;Utrn;Coro1a;Tnfrsf12a;Emp1;Mfge8;H2-Eb1;Kirrel;Nid1;Prkar2b;Cat;Atp1a1;Icosl;Anxa4;H2-Aa;Sncg;Thbs1;Mpz;Sptbn1;Gnai1;Car4;Slc9a1;Ndrg1;Prx;Syk;Zbtb16;Sorbs2;Fam129a;H2-Ab1;Hspa1a;Abra	Slc22a5;Crip2;Celsr1;Ighm;Chrna2;Cdc42ep2;Laptm5;Nrp2;Vnn1;Hk1;Sytl1;Mfsd2a;Ly6d;Arl4d;Axl;Clstn3;Slc36a1;Ncmap;Slc9a1;Paqr7;Notch1;Lrp5;Slc12a7;Sirpa;Nrros
GO:0007155	cell adhesion	BP	522	0.0737548	0.0180255	3.38248e-09	0.0265827	Sorbs2;Thbs2;Wisp2;Nedd9	Dmp1;Agt;Tnfaip6;Cldn11;Spp1;Rnd1;Hapln2;Ret;Efna1	Cxcl13;Parva;Ppfibp1;Syk;Lep;Sorbs1;Ccdc80;Nuak1;Nid1;Utrn;Sorbs2;Tnfrsf12a;Fbln5;Coro1a;Ctnna1;Thbs1;Serpine1;Thbs2;Kirrel;Wisp2;Aoc3;Smoc1;Adipoq;App;Nedd9;Zfp36l1;Dlc1;Mfge8	Axl;Celsr1;Sdc3;Vnn1;Clstn3;Sirpa;Apoa4;Nrp2;Notch1
GO:0022610	biological adhesion	BP	525	0.0753721	0.0183874	8.8089e-10	0.0280024	Nedd9;Thbs2;Sorbs2;Wisp2	Tnfaip6;Spp1;Ret;Agt;Dmp1;Efna1;Cldn11;Hapln2;Rnd1	Adipoq;Kirrel;Ctnna1;Nedd9;Parva;Thbs2;Ccdc80;Coro1a;Dlc1;Tnfrsf12a;Lep;Ppfibp1;App;Thbs1;Utrn;Sorbs1;Serpine1;Zfp36l1;Gbp6;Smoc1;Syk;Nid1;Nuak1;Cxcl13;Aoc3;Sorbs2;Fbln5;Mfge8;Wisp2	Notch1;Sdc3;Nrp2;Clstn3;Sirpa;Axl;Celsr1;Apoa4;Vnn1
GO:0044459	plasma membrane part	CC	874	0.732302	0.00953068	2.59415e-06	0.028243	Slco3a1;Trpv2	Ret;Gjc2;H2-D1;Efna1;Gjb1;Kcng4;Cldn11;Glra1;Tanc1;Epn3;Fzd9;Hspa1a;Bst2;Th	Syk;Il6ra;Lcp1;Sorbs1;Ctnna1;Prkcdbp;H2-Eb1;Dlc1;Anxa4;Mfge8;Atp1a1;Kirrel;Coro1a;Slc9a1;H2-Aa;Atp2a2;Gnai1;Cd79b;Utrn;Ighd;Erbb2ip;Apcdd1;H2-Ob;Oxtr;Icosl;Ntrk2;H2-Ab1;Car4;Hspa1a;Sptbn1;Thbs1	Slc22a5;Ighm;Clstn3;Laptm5;Chrna2;Celsr1;Hk1;Sirpa;Slc9a1;Mfsd2a;Ncmap;Sytl1;Notch1
GO:0019815	B cell receptor complex	CC	6	1	1	2.03844e-05	0.0301441			Syk;Ighd;Cd79b	Ighm
GO:0005886	plasma membrane	CC	1957	0.0505735	0.0153958	8.17726e-07	0.0310265	Sfrp5;Wisp2;Slc11a1;Slco3a1;Adap2;Trpv2;Ehd3;Alg10b;Gpc1;Sorbs2	Fzd9;Efna1;Sfrp5;Dio3;Gjb1;Rhog;H2-D1;Hspa1a;Epn3;Rnd1;Phlda3;Glra1;Cldn11;Slc29a4;Cpm;Gjc2;Mrap2;Bst2;Cabp7;Th;Arrdc2;Ret;Tanc1;Kcng4	Lcp1;Mpz;Apcdd1;Ctnna1;Anxa4;Syk;Atp2a2;Erbb2ip;Sfrp5;Wisp2;Sorbs1;Coro1a;Cd79b;Mfge8;H2-Eb1;Emp1;Kirrel;Hspa1a;H2-Aa;Pmepa1;Cat;Il6ra;Ntrk2;Plin4;Abra;Thbs1;Atp1a1;Eltd1;Parva;Aoc3;Ighd;Utrn;Cdc42ep1;Prx;Tnfrsf12a;Prkar2b;Slc9a1;Prkcdbp;H2-Ab1;Oxtr;Mbp;H2-Ob;Car4;App;Ndrg1;Icosl;Fam129a;Sptbn1;Lpl;Gnai1;Zbtb16;Sorbs2;Smurf2;Dlc1;Sncg	Cdc42ep2;Hk1;Ly6d;Ighm;Sirpa;Paqr7;Laptm5;Chrna2;Slc12a7;Notch1;Slc36a1;Celsr1;Slc22a5;Sytl1;Vnn1;Ncmap;Slc9a1;Mfsd2a;Nrp2;Lrp5;Arl4d;Clstn3;Axl;Nrros
GO:0051239	regulation of multicellular organismal process	BP	1269	0.0829646	0.004464	1.25702e-06	0.0362662	Slc11a1;Trpv2;Thbs2;Sema3f;Adm;Pdk4;Sfrp5	Cited1;Efna1;Olig2;Lhx5;Isg15;Glra1;Tsc22d3;Spp1;Dio3;Pomc;Ret;Cyp26b1;Th;Limk1;Klk6;Agt;Sfrp5;Wnt3	Atp2a2;Adipoq;App;Atp1a1;Ctnna1;Smtnl1;Map4k4;Lep;Tgif1;Serpine1;Wwtr1;Nipbl;H2-Aa;Fbxo32;Thbs1;Cebpd;Trim63;Il6ra;Zeb2;Smoc1;Thbs2;Syk;Myh6;Icosl;Csrp3;Cxcl13;Slc9a1;Zbtb16;Ntrk2;Tnfrsf12a;Dmrt2;Sparc;Acp5;Ankrd2;Pdk4;Anxa4;Igfbp3;Sfrp5;Btg1;Maff;Arntl;Oxtr;Myh7	Lrp5;Slc22a5;Rsad2;Apoa4;Notch1;Isg15;Axl;Mmrn2;Celsr1;Hist1h4i;Vnn1;Slc9a1;Megf8;Ncmap;Mafb;Slc25a25;Mgll
GO:0048856	anatomical structure development	BP	2465	0.0223262	0.0191118	2.40107e-06	0.0393479	Adap2;Palld;Adm;Gpc1;Ercc2;Sfrp5;Mustn1;Sema3f;Peg3;Trpv2;Thbs2;Alg10b;Peg10	Cldn11;Wnt3;Arhgap24;Olig2;Rbm38;Ret;Akr1b3;Lhx5;Tsc22d3;Sfrp5;Agt;Fzd9;Cited1;Lrig1;Th;Hapln2;Limk1;Adamts2;Cyp26b1;Dmp1;Isg15;Klk6;Efna1;Tanc1;Spp1;Anln;Rnd1	Smtnl1;Prmt2;Cebpd;Syk;Xirp1;Anxa4;Apcdd1;Myh7;Ighd;Cxcl13;Tgif1;Lep;Yy1;Smoc1;Ablim1;Angptl4;Csrp3;Ddit4;Slc9a1;Sfrp5;Sparc;Hp;Zeb2;H2-Ab1;Parva;Mfge8;Peg3;Zbtb16;Btg1;Bcar3;Nipbl;Oxtr;Serpine1;Top1;Npr3;Igkc;Tnfrsf12a;Ntrk2;Wwtr1;Thbs2;Palmd;Dlc1;Ndrg1;Acp5;Nid1;Il6ra;Cdc42ep1;H2-Aa;Mbp;Dmrt2;Maff;Utrn;Cat;Slit3;Ctnna1;Thbs1;Myh6;Adipoq;App;Ankrd2;Lox;Zfp36l1;Igfbp3;Icosl;Arntl;Coro1a;Map4k4	Cdc42ep2;Crip2;Axl;Sbno2;Mafb;Lrp5;Sik1;Slc9a1;Notch1;Mfsd2a;Rita1;Nrp2;Sirpa;Mgll;Celsr1;Mmrn2;Slc25a25;Megf8;Gadd45g;Isg15;Rsad2;Fam83h;Clstn3;Vnn1;Paqr7;Slc22a5;Ncmap;Hist1h4i;Tsku
GO:0005509	calcium ion binding	MF	258	0.175664	0.313224	3.94357e-05	0.0443063	Thbs2;Ehd3	Pvalb;Ret;Cabp7	Thbs2;Lcp1;Anxa4;Eltd1;Nid1;Aoc3;Fbln5;Slit3;Smoc1;S100a11;Atp2a2;Thbs1;Sparc;Edem1	Notch1;Slc25a25;Celsr1;Clstn3;Megf8
GO:0050793	regulation of developmental process	BP	1114	0.246424	0.0362455	4.43316e-05	0.0502552	Thbs2;Sema3f;Sfrp5;Trpv2;Adm	Ret;Efna1;Lhx5;Agt;Rbm38;Limk1;Cited1;Wnt3;Cyp26b1;Sfrp5;Olig2;Tsc22d3;Klk6;Isg15	Nipbl;Lpl;Dmrt2;Zeb2;Smoc1;Ctnna1;Thbs1;Coro1a;Lep;Ntrk2;Zbtb16;Ankrd2;App;Map4k4;Oxtr;Thbs2;Tnfrsf12a;Serpine1;Cdc42ep1;Sparc;Maff;Sfrp5;Myh6;Tgif1;Igfbp3;Wwtr1;H2-Aa;Adipoq;Cebpd;Btg1;Arntl;Nuak1;Parva;Dlc1;Palmd;Syk	Notch1;Cdc42ep2;Axl;Megf8;Lrp5;Vnn1;Celsr1;Hist1h4i;Mmrn2;Mafb;Mgll;Ncmap;Isg15;Sik1;Lpin1
GO:0007275	multicellular organismal development	BP	2331	0.0341041	0.034482	1.47791e-05	0.0529251	Sema3f;Sfrp5;Peg3;Ercc2;Trpv2;Adm;Palld;Adap2;Thbs2;Peg10;Alg10b;Gpc1	Ret;Efna1;Tsc22d3;Cited1;Sfrp5;Cyp26b1;Lhx5;Agt;Olig2;Dmp1;Wnt3;Hapln2;Lrig1;Th;Arhgap24;Limk1;Adamts2;Isg15;Akr1b3;Fzd9;Cldn11;Spp1;Rnd1;Klk6;Anln	Arntl;Smoc1;Zeb2;Serpine1;Ankrd2;Sparc;Cebpd;Ntrk2;Acp5;Dlc1;Sfrp5;Tnfrsf12a;H2-Aa;Lep;Yy1;Peg3;Il6ra;Zbtb16;Map4k4;Zfp36l1;Myh6;Npr3;Igkc;Wwtr1;Xirp1;Apcdd1;Ctnna1;Syk;Ddit4;Ndrg1;Oxtr;Hp;Bcar3;Thbs1;Myh7;Tgif1;Csrp3;Parva;Ighd;App;Slit3;Cat;Anxa4;Maff;Top1;Mfge8;Smtnl1;Icosl;Dmrt2;Nid1;Ablim1;Nipbl;Cxcl13;Btg1;Slc9a1;H2-Ab1;Thbs2;Lox;Igfbp3;Angptl4;Mbp;Adipoq	Nrp2;Crip2;Mafb;Rita1;Lrp5;Notch1;Hist1h4i;Celsr1;Mmrn2;Axl;Sirpa;Sik1;Mgll;Gadd45g;Slc22a5;Paqr7;Slc25a25;Isg15;Ncmap;Clstn3;Fam83h;Megf8;Rsad2;Vnn1;Tsku;Slc9a1;Sbno2
GO:0044767	single-organism developmental process	BP	2737	0.00872631	0.036528	1.56905e-06	0.0529717	Sfrp5;Sema3f;Prelp;Ercc2;Adm;Gpc1;Peg10;Thbs2;Mustn1;Adap2;Peg3;Palld;Mrc2;Trpv2;Alg10b	Agt;Wnt3;Sfrp5;Lhx5;Cyp26b1;Ret;Cldn11;Rbm38;Efna1;Limk1;Spp1;Klk6;Th;Akr1b3;Arhgap24;Isg15;Olig2;Fzd9;Cdkn1a;Tsc22d3;Rnd1;Cited1;Hapln2;Adamts2;Dmp1;Tanc1;Lrig1;Anln	Anxa4;Ndrg1;Xirp1;Ntrk2;Prmt2;Adipoq;Arntl;Wwtr1;Smoc1;Sfrp5;Eid1;Tgif1;Serpine1;Thbs1;Prelp;Parva;H2-Aa;Zeb2;Oxtr;Zbtb16;Ablim1;Syk;Cxcl13;Il6ra;Ighd;Lep;Mfge8;Hp;Igkc;Npr3;Slit3;Myh6;Sparc;Yy1;Acp5;Icosl;Ctnna1;Thbs2;Bcar3;Utrn;Apcdd1;App;Coro1a;Angptl4;Btg1;Peg3;Smtnl1;Tnfrsf12a;Dlc1;Zfp36l1;Ankrd2;Csrp3;Cebpd;Cdc42ep1;Lox;Lpl;H2-Ab1;Mbp;Top1;Nipbl;Igfbp3;Ifi27l2a;Slc9a1;Mrc2;Ddit4;Palmd;Maff;…	Megf8;Cdc42ep2;Crip2;Sbno2;Rsad2;Nrp2;Notch1;Paqr7;Slc22a5;Rita1;Celsr1;Slc25a25;Isg15;Mgll;Vnn1;Mmrn2;Lpin1;Cdkn1a;Hist1h4i;Lrp5;Mafb;Sik1;Sirpa;Axl;Mfsd2a;Gadd45g;Fam83h;Slc9a1;Tsku;Clstn3;Ncmap
GO:0065007	biological regulation	BP	5374	0.0125843	0.271546	1.82841e-08	0.0556406	Dock8;Peg3;Palld;Adap2;Slc11a1;Wisp2;Acta2;Pdk4;Thbs2;Ercc2;Sfrp5;Ehd3;Pcolce2;Sema3f;Mest;Trpv2;Arid2;Nedd9;Mt1;Mt2;Peg10;Adm;Gpc1	Fzd9;Rhog;Cyp26b1;Vamp1;Lhx5;Bst2;Wnt3;Th;Pvalb;Tsc22d3;Spp1;Glrx5;Phlda3;Klk6;Rbm38;Rab37;Sfrp5;Glra1;Efna1;Arhgap24;Hmga1;Agt;Ret;Olig2;Kcng4;Cited1;Rassf4;Dio3;Mrap2;Tnfaip6;Rnd1;H2-D1;Akr1b3;Limk1;Hspa1a;Pomc;Dmp1;Avpi1;Isg15;Cdkn1a;Cldn11;Ldoc1;Arrdc2	Ccnd2;Coro1a;Npr3;Peg3;Cebpd;Rab31;Smurf2;Bcar3;Apcdd1;Ankrd2;Sorbs1;Eid1;Prmt2;Wwtr1;Angptl4;Zfp36l1;Smoc1;Tgif1;Igfbp3;Map4k4;Ctnna1;Gnai1;Adipoq;H2-Ab1;Htra3;Zeb2;Smtnl1;Icosl;Parva;Hp;Atp1a1;Btg1;Slc9a1;Dlc1;Cdc42ep1;Sp100;Xirp1;Hspa1b;Slit3;Oxtr;Wisp2;Abra;Ntrk2;Timp4;Cd79b;Acta2;Zbtb16;Cxcl13;Optn;Cat;Prkar2b;Dstn;Dmrt2;Pdk4;Ighd;Yy1;Myh6;Thbs2;Thbs1;Eltd1;Sfrp5;Fam129a;Akap12;App;Egln3;Rca…	Crip2;Notch1;Rita1;Sbno2;Hk1;Nrp2;Cdc42ep2;Zbtb38;Mypop;Celsr1;Slc9a1;Mafb;Megf8;Sik1;Lrp5;Bahd1;Arl4d;Plin5;Mlxip;Cbx4;Chrna2;Cidec;Ncmap;Tsc22d1;Mgll;Slc25a25;Apoa4;Pim1;Serpinb1a;Rsad2;Gadd45g;Serinc2;Slc22a5;Agk;Lpin1;Sirpa;Rreb1;Ighm;Cda;Axl;Mmrn2;Ckb;Jade2;Paqr7;Tlr12;Slc12a7;Isg15;Anks1;Hist1h4i;Cyp17a1;Cdkn1a;Vgll4;Tsku;Vnn1;Zfp574;Oasl1
GO:0050789	regulation of biological process	BP	5158	0.0413562	0.471326	3.94502e-08	0.0557016	Sema3f;Dock8;Ercc2;Sfrp5;Adap2;Palld;Wisp2;Thbs2;Slc11a1;Pdk4;Arid2;Peg3;Gpc1;Mt1;Adm;Mest;Peg10;Mt2;Trpv2;Nedd9;Pcolce2	Limk1;Cited1;Tsc22d3;Glrx5;Mrap2;Rhog;Ret;Sfrp5;Glra1;Pomc;Akr1b3;Fzd9;Cdkn1a;Arhgap24;Isg15;Hmga1;Phlda3;H2-D1;Arrdc2;Wnt3;Rnd1;Efna1;Agt;Klk6;Lhx5;Cyp26b1;Rbm38;Rassf4;Olig2;Kcng4;Spp1;Bst2;Avpi1;Tnfaip6;Dmp1;Rab37;Dio3;Ldoc1;Th	Prmt2;Npr3;Slit3;Ndrg1;Zfp36l1;Zbtb16;Kirrel;Smoc1;Ighd;Zeb2;Angptl4;Nid1;Coro1a;Prkcdbp;Serpine1;Ctnna1;Gnai1;Cdc42ep1;Sfrp5;Hp;Sorbs1;Wwtr1;H2-Ab1;Sptbn1;Myh6;Wisp2;Thbs2;Xirp1;Syk;App;Aoc3;Atp2a2;Atp1a1;Ankrd2;Map4k4;Ablim1;Dlc1;Lmod2;Cd79b;Lep;Fam129a;Nipbl;Apcdd1;Btg1;Eltd1;Mfge8;Ccnd2;Sp100;Sik2;Trim63;H2-Aa;Tgif1;Il6ra;Lpl;Oxtr;Lcp1;H2-Ob;Cebpd;Icosl;Ntrk2;Smtnl1;Myh7;Sdpr;Pdk4;Anxa4;Optn;…	Paqr7;Apoa4;Rita1;Mypop;Sbno2;Sirpa;Notch1;Tsc22d1;Zbtb38;Ncmap;Vgll4;Tlr12;Pim1;Bahd1;Mlxip;Mafb;Gadd45g;Hk1;Slc22a5;Crip2;Cdkn1a;Isg15;Lpin1;Lrp5;Slc25a25;Cda;Celsr1;Plin5;Serinc2;Sik1;Jade2;Arl4d;Vnn1;Serpinb1a;Nrp2;Megf8;Rsad2;Tsku;Agk;Cyp17a1;Axl;Chrna2;Mgll;Hist1h4i;Mmrn2;Anks1;Slc9a1;Cbx4;Rreb1;Cdc42ep2;Zfp574;Cidec;Ighm;Oasl1
GO:0032502	developmental process	BP	2757	0.00935792	0.0393843	2.21228e-06	0.0587462	Peg3;Sfrp5;Prelp;Sema3f;Mustn1;Ercc2;Adap2;Palld;Mrc2;Thbs2;Peg10;Adm;Trpv2;Alg10b;Gpc1	Wnt3;Hapln2;Rbm38;Adamts2;Sfrp5;Lhx5;Efna1;Klk6;Spp1;Ret;Fzd9;Isg15;Agt;Arhgap24;Akr1b3;Lrig1;Tsc22d3;Olig2;Cdkn1a;Cyp26b1;Cited1;Th;Rnd1;Limk1;Cldn11;Tanc1;Dmp1;Anln	App;Ndrg1;Ighd;Acp5;Wwtr1;Peg3;Lep;Apcdd1;Arntl;Tnfrsf12a;Thbs1;H2-Aa;Bcar3;Sfrp5;Prelp;Prmt2;Mfge8;Ntrk2;Yy1;Nipbl;Zfp36l1;Coro1a;Igkc;Zbtb16;Sparc;Cat;Syk;Slc9a1;Myh7;Npr3;Angptl4;Cebpd;Tgif1;Xirp1;Map4k4;Zeb2;Ctnna1;Igfbp3;Btg1;Adipoq;Ankrd2;Cxcl13;Smoc1;Parva;Utrn;Ablim1;Csrp3;Mrc2;Serpine1;Thbs2;Ddit4;Dlc1;Dmrt2;Il6ra;Top1;Myh6;Cdc42ep1;Slit3;Maff;Icosl;Smtnl1;Nuak1;Oxtr;Mbp;Anxa4;Eid1;Lox;H…	Rita1;Sbno2;Celsr1;Axl;Nrp2;Sik1;Mfsd2a;Slc25a25;Mgll;Notch1;Mmrn2;Megf8;Slc9a1;Lrp5;Isg15;Rsad2;Gadd45g;Cdc42ep2;Sirpa;Crip2;Cdkn1a;Slc22a5;Ncmap;Fam83h;Paqr7;Tsku;Hist1h4i;Mafb;Clstn3;Lpin1;Vnn1
GO:0048589	developmental growth	BP	193	0.000239383	0.0563498	0.00532108	0.0659555	Sfrp5;Mustn1;Adm;Sema3f;Trpv2	Sfrp5;Wnt3;Agt;Limk1	Tnfrsf12a;App;Sfrp5;Slit3;Lep;Nipbl;Thbs1;Myh6;Prmt2	Nrp2;Megf8;Mgll;Notch1
GO:0019814	immunoglobulin complex	CC	10	1	1	0.000171605	0.0689412			Syk;Ighd;Cd79b	Ighm
GO:0001786	phosphatidylserine binding	MF	13	1	1	0.000786028	0.0759491			Thbs1;Sdpr;Mfge8	Axl
GO:0072358	cardiovascular system development	BP	544	0.0903006	0.083016	0.000432537	0.0787171	Thbs2;Adm;Sfrp5;Adap2	Sfrp5;Agt;Cited1;Efna1;Fzd9;Th;Arhgap24	Tnfrsf12a;Nipbl;Zfp36l1;Thbs2;Thbs1;Myh6;Angptl4;Parva;Btg1;Sfrp5;Lox;Serpine1;Syk;Dlc1;Sparc;Ntrk2;Xirp1;Mfge8;Csrp3;Slc9a1;Myh7	Slc22a5;Mmrn2;Lrp5;Nrp2;Notch1;Sik1;Megf8;Slc9a1
GO:0072359	circulatory system development	BP	544	0.0903006	0.083016	0.000432537	0.0787171	Adm;Sfrp5;Thbs2;Adap2	Fzd9;Arhgap24;Cited1;Sfrp5;Agt;Th;Efna1	Serpine1;Csrp3;Parva;Thbs1;Mfge8;Ntrk2;Xirp1;Sfrp5;Angptl4;Dlc1;Slc9a1;Thbs2;Myh6;Tnfrsf12a;Zfp36l1;Nipbl;Myh7;Syk;Btg1;Sparc;Lox	Lrp5;Mmrn2;Nrp2;Megf8;Notch1;Slc9a1;Slc22a5;Sik1
GO:0050794	regulation of cellular process	BP	4869	0.262265	0.585313	1.31031e-05	0.0803719	Ercc2;Dock8;Sfrp5;Sema3f;Slc11a1;Wisp2;Palld;Pdk4;Thbs2;Mt2;Mt1;Gpc1;Arid2;Adap2;Trpv2;Adm;Peg10	Rbm38;Glra1;Sfrp5;Wnt3;Lhx5;Mrap2;Cited1;Tsc22d3;Akr1b3;Hmga1;Klk6;Rassf4;Rhog;Bst2;Pomc;Fzd9;Arhgap24;Avpi1;Ret;Rab37;Isg15;Cyp26b1;Rnd1;Efna1;Dmp1;Cdkn1a;Glrx5;Kcng4;Olig2;Spp1;Tnfaip6;Limk1;Agt;Phlda3;Arrdc2;Ldoc1	Eltd1;Hp;Smoc1;Sfrp5;Gnai1;Anxa4;Npr3;Igfbp3;Slit3;Cebpd;Zbtb16;Oxtr;Bcar3;Zeb2;Cd79b;Apcdd1;Ccnd2;Coro1a;Palmd;Ablim1;Angptl4;Lpl;Sp100;Zfp36l1;Rab31;Ctnna1;Sdpr;Ighd;Yy1;Wisp2;Ddit4;Icosl;Lgals12;App;Dstn;Sorbs1;Syk;Sparc;Htra3;Sik2;H2-Aa;Serpine1;Mfge8;Ntrk2;Prmt2;Tgif1;Pdk4;Utrn;Tnfrsf12a;Wwtr1;Adipoq;Ankrd2;Dlc1;Atp2a2;Aoc3;Nid1;Prkar2b;Thbs2;Arntl;Lmod2;Rnasel;Prx;Xirp1;Fam129a;Parva;Il6ra;…	Tsc22d1;Zbtb38;Crip2;Cdc42ep2;Rita1;Apoa4;Paqr7;Sbno2;Tlr12;Nrp2;Ncmap;Plin5;Axl;Megf8;Bahd1;Cda;Chrna2;Cbx4;Pim1;Hk1;Lrp5;Rsad2;Anks1;Ighm;Mypop;Notch1;Lpin1;Oasl1;Sik1;Celsr1;Arl4d;Gadd45g;Isg15;Hist1h4i;Mafb;Jade2;Cyp17a1;Mgll;Vnn1;Cdkn1a;Sirpa;Agk;Vgll4;Cidec;Tsku;Mlxip;Mmrn2;Rreb1;Zfp574;Slc9a1
GO:0007167	enzyme linked receptor protein signaling pathway	BP	445	0.151473	0.415398	0.000335752	0.0856747	Peg10;Pdk4;Gpc1	Efna1;Ret;Cited1;Agt	Myh6;Lep;Sorbs1;Thbs1;App;Pdk4;Sptbn1;Pmepa1;Syk;Smurf2;Ntrk2;Ddit4;Adipoq;Sik2;Tgif1;Igfbp3;Wwtr1;Htra3	Axl;Notch1;Megf8;Nrp2;Anks1;Jade2;Mmrn2
GO:0009986	cell surface	CC	363	0.025933	0.0381679	1.44139e-07	0.0874341	Slco3a1;Wisp2;Trpv2;Mrc2	Bst2;Fzd9;H2-D1;Cpm;Glra1;Vamp1	Anxa4;Mfge8;Ntrk2;Wisp2;Sparc;Il6ra;H2-Aa;Slc9a1;Cd79b;Icosl;Lpl;Car4;Tpm3;App;Tnfrsf12a;H2-Ab1;Thbs1;Aoc3;Mrc2;Ighd;Adipoq	Notch1;Axl;Slc9a1;Ighm;Apoa4;Ly6d
GO:2000026	regulation of multicellular organismal development	BP	845	0.107024	0.0105809	0.000407986	0.0895744	Trpv2;Sfrp5;Thbs2;Sema3f;Adm	Tsc22d3;Ret;Cyp26b1;Isg15;Agt;Klk6;Sfrp5;Olig2;Cited1;Limk1;Efna1;Lhx5;Wnt3	Ntrk2;Ctnna1;Maff;Thbs1;Sparc;Zbtb16;Serpine1;Lep;Sfrp5;Tgif1;Adipoq;Arntl;Dmrt2;Zeb2;Syk;Thbs2;Map4k4;Wwtr1;Nipbl;Btg1;Ankrd2;Oxtr;Myh6;App;Igfbp3;Tnfrsf12a;H2-Aa	Mgll;Vnn1;Isg15;Axl;Notch1;Celsr1;Megf8;Mmrn2;Ncmap;Mafb;Hist1h4i
GO:0044092	negative regulation of molecular function	BP	505	0.799661	0.468918	0.000609552	0.096274	Sfrp5	Limk1;Agt;Cdkn1a;Sfrp5	App;Wwtr1;Serpine1;Smtnl1;Hspa1b;Angptl4;Cat;Itih5;Prmt2;Anxa4;Timp4;Serpina3n;Sfrp5;Prkar2b;Hp;Serpina3c;Thbs1;Adipoq;Npr3	Serpinb1a;Sik1;Pim1;Gadd45g;Plin5;Lrp5;Cdkn1a;Notch1
GO:0040007	growth	BP	542	2.39469e-05	0.201904	0.00155706	0.106305	Ercc2;Sfrp5;Nedd9;Sema3f;Peg3;Wisp2;Trpv2;Mustn1;Adm	Cdkn1a;Sfrp5;Limk1;Wnt3;Agt;Dio3	Zfp36l1;Wwtr1;Lep;Prmt2;Emp1;Igfbp3;Il6ra;Thbs1;Myh6;Sfrp5;Nedd9;Peg3;Wisp2;Nipbl;Htra3;Slit3;App;Tnfrsf12a;Slc9a1	Megf8;Cdkn1a;Notch1;Mgll;Slc25a25;Cda;Nrp2;Slc9a1
GO:0007165	signal transduction	BP	2306	0.149442	0.152628	0.000339654	0.111012	Pdk4;Mt2;Slc11a1;Sema3f;Peg10;Dock8;Sfrp5;Adap2;Gpc1;Mt1	Wnt3;Cyp26b1;Rbm38;Cdkn1a;Avpi1;Cited1;Akr1b3;Agt;Rnd1;Sfrp5;Phlda3;Glra1;Arhgap24;Rassf4;Fzd9;Klk6;Rab37;Rhog;Arrdc2;Ret;Pomc;Efna1	Apcdd1;Gnai1;Oxtr;Prmt2;Cxcl13;Tnfrsf12a;Cd79b;Syk;Lgals12;Map4k4;Sorbs1;Sik2;Thbs1;Icosl;Pmepa1;Pdk4;Wwtr1;Slc9a1;Serpine1;Ddit4;Optn;Htra3;Cat;Eltd1;Bcar3;Ntrk2;Smoc1;Prkcdbp;Abra;Il6ra;Sfrp5;Hmha1;Arntl;Slit3;Zeb2;Trim12c;Lcp1;Ctnna1;Igfbp3;Myh6;Rab31;Dlc1;Lep;Adipoq;Coro1a;Cdc42ep1;Akap12;Smurf2;App;Tgif1;Sptbn1;Sparc;Npr3;Ppfibp1;Rcan3;Atp2a2	Nrp2;Megf8;Gadd45g;Rsad2;Cdkn1a;Tsku;Ighm;Sik1;Axl;Jade2;Plin5;Paqr7;Slc9a1;Lrp5;Celsr1;Chrna2;Notch1;Vnn1;Mgll;Anks1;Agk;Rita1;Tlr12;Mmrn2;Arl4d
GO:0002026	regulation of the force of heart contraction	BP	21	0.0556273	1	1.14169e-06	0.113108	Adm		Myh6;Myh7;Csrp3;Atp1a1;Slc9a1;Atp2a2	Slc9a1
GO:0032288	myelin assembly	BP	15	0.000668552	1	1	0.113108	Ercc2;Gpc1			Ncmap
GO:2000377	regulation of reactive oxygen species metabolic process	BP	62	1	0.0521384	0.000411729	0.116495		Agt;Cdkn1a	Lep;Syk;Thbs1;Acp5;Fbln5;Hp	Plin5;Cdkn1a
GO:0007166	cell surface receptor signaling pathway	BP	1235	0.327108	0.509305	0.000236319	0.130011	Sema3f;Sfrp5;Gpc1;Pdk4;Peg10	Agt;Fzd9;Wnt3;Cited1;Klk6;Ret;Sfrp5;Glra1;Efna1;Pomc	Prmt2;Htra3;Cd79b;Tnfrsf12a;Syk;Gnai1;Wwtr1;Eltd1;Apcdd1;Sik2;Myh6;Ntrk2;Ddit4;Cxcl13;Sfrp5;Igfbp3;Zeb2;Thbs1;Arntl;Serpine1;Il6ra;Sorbs1;Ctnna1;Adipoq;Coro1a;Lep;Oxtr;Npr3;App;Tgif1;Smurf2;Slit3;Pmepa1;Pdk4;Sptbn1	Megf8;Notch1;Axl;Jade2;Nrp2;Rita1;Mgll;Tsku;Ighm;Celsr1;Anks1;Lrp5;Agk;Mmrn2
GO:0043086	negative regulation of catalytic activity	BP	370	0.691825	0.262209	0.000306075	0.131337	Sfrp5	Agt;Sfrp5;Cdkn1a;Limk1	Angptl4;Serpina3c;Thbs1;Npr3;Timp4;Itih5;Serpine1;App;Sfrp5;Smtnl1;Prkar2b;Wwtr1;Hp;Hspa1b;Adipoq;Serpina3n	Notch1;Gadd45g;Lrp5;Cdkn1a;Plin5;Serpinb1a
GO:0002684	positive regulation of immune system process	BP	285	0.637646	0.51042	0.000585152	0.140152	Slc11a1	H2-D1;Cdkn1a	H2-Ab1;Icosl;Ighd;Syk;Aoc3;Cxcl13;Serpine1;Cd79b;Thbs1;Trim12c;Coro1a;Zbtb16;H2-Aa	Vnn1;Ighm;Axl;Cdkn1a;Rsad2
GO:0023052	signaling	BP	2526	0.0611583	0.0141976	0.000533488	0.149312	Pdk4;Mt2;Sfrp5;Gpc1;Sema3f;Adap2;Thbs2;Adm;Mt1;Dock8;Slc11a1;Peg10	Wnt3;Rhog;Agt;Rbm38;Glra1;Pomc;Cdkn1a;Vamp1;Cited1;Lhx5;Ret;Olig2;Akr1b3;Th;Fzd9;Cyp26b1;Cldn11;Sfrp5;Arhgap24;Klk6;Gjc2;Efna1;Avpi1;Arrdc2;Rassf4;Phlda3;Rnd1;Ddc;Rab37	Smoc1;Slit3;Igfbp3;Gnai1;Sorbs1;Hmha1;Lcp1;Ntrk2;Optn;Cd79b;Zeb2;Prmt2;Pdk4;Cat;Coro1a;Bcar3;Sik2;Apcdd1;Syk;App;Akap12;Dlc1;Icosl;Abra;Lgals12;Thbs1;Myh6;Il6ra;Slc9a1;Lep;Cxcl13;Prkcdbp;Eltd1;Cdc42ep1;Ddit4;Wwtr1;Map4k4;Smurf2;Sfrp5;Tnfrsf12a;Tgif1;Mbp;Sncg;Htra3;Rab31;Arntl;Sptbn1;Adipoq;Oxtr;Npr3;Ctnna1;Rcan3;Sparc;Thbs2;Trim12c;Ppfibp1;Atp2a2;Pmepa1;Serpine1	Notch1;Rita1;Anks1;Megf8;Nrp2;Rsad2;Jade2;Cdkn1a;Ighm;Slc9a1;Tlr12;Lrp5;Mmrn2;Agk;Mgll;Clstn3;Paqr7;Vnn1;Axl;Plin5;Celsr1;Tsku;Gadd45g;Sik1;Chrna2;Arl4d
GO:0044700	single organism signaling	BP	2526	0.0611583	0.0141976	0.000533488	0.149312	Dock8;Adap2;Gpc1;Adm;Mt2;Pdk4;Sfrp5;Thbs2;Sema3f;Mt1;Slc11a1;Peg10	Agt;Cyp26b1;Lhx5;Arhgap24;Avpi1;Akr1b3;Cldn11;Wnt3;Cited1;Th;Ddc;Efna1;Cdkn1a;Ret;Pomc;Rhog;Rbm38;Glra1;Olig2;Vamp1;Gjc2;Fzd9;Rassf4;Arrdc2;Klk6;Sfrp5;Rnd1;Phlda3;Rab37	Prmt2;Syk;Apcdd1;Lcp1;Hmha1;Rab31;Arntl;Optn;Cd79b;Coro1a;Bcar3;Oxtr;Zeb2;Tgif1;Ctnna1;Igfbp3;Sncg;Wwtr1;Tnfrsf12a;Ddit4;Map4k4;Gnai1;Htra3;Sparc;Npr3;Eltd1;Lep;Serpine1;Ntrk2;Sorbs1;Smurf2;Il6ra;Rcan3;Adipoq;Cxcl13;App;Icosl;Cdc42ep1;Slc9a1;Akap12;Trim12c;Pdk4;Slit3;Atp2a2;Smoc1;Sfrp5;Sik2;Sptbn1;Mbp;Prkcdbp;Thbs2;Lgals12;Abra;Pmepa1;Dlc1;Cat;Thbs1;Myh6;Ppfibp1	Nrp2;Lrp5;Rita1;Axl;Cdkn1a;Mmrn2;Ighm;Notch1;Jade2;Megf8;Paqr7;Rsad2;Tlr12;Slc9a1;Mgll;Sik1;Plin5;Celsr1;Vnn1;Agk;Clstn3;Gadd45g;Arl4d;Chrna2;Tsku;Anks1
GO:0042742	defense response to bacterium	BP	79	0.219443	0.304292	1.79529e-05	0.167596	Slc11a1	Isg15	Serpine1;Gbp6;Syk;Acp5;Cxcl13;Adamts5;Hp;Optn	Ighm;Isg15
GO:0003008	system process	BP	609	0.251216	0.0659342	0.000681992	0.182478	Acta2;Adm;Alg10b	Agt;Lrig1;Glra1;Th;Fzd9;Olig2;Cldn11;Pomc;Tanc1	Acta2;Lep;Atp2a2;Smtnl1;Atp1a1;Nipbl;Myh7;Oxtr;Prkar2b;Kirrel;App;Mbp;Csrp3;Aoc3;Ntrk2;Npr3;Fbxo32;Trim63;Myh6;Adipoq;Slc9a1	Mgll;Slc22a5;Lrp5;Ncmap;Apoa4;Xpnpep3;Slc9a1
GO:0005488	binding	MF	7299	0.229552	0.410862	2.60571e-06	0.184738	Wisp2;Hspb7;Pdk4;Acta2;Palld;Prelp;Ccl6;Ercc2;Mt2;Ehd3;Thbs2;Mrc2;Slc11a1;Hnrnpa3;Adap2;Arid2;Adm;Pcolce2;Gpc1;Peg3;Sorbs2;Peg10;Mt1;Sfrp5	Cpm;Carns1;Wnt3;Pvalb;H2-D1;Fzd9;C1ql2;Tsc22d3;Glra1;Gjb1;Limk1;Rbm38;Hdc;Cldn11;Cdkn1a;Efna1;Iscu;Spp1;Hapln2;Agt;Cyp26b1;Hspa1a;Rab37;Cited1;Adamts2;Th;Tceanc2;Isg15;Ret;Lhx5;Epn3;Phlda3;Glrx5;Vamp1;Ddc;Sh3bgr;Rhog;Pomc;Tnfaip6;Cabp7;Rnd1;Olig2;Hmga1;Mrap2;Dmp1;Zfp747;Anln;Tuba1c;Nt5m;Gpt;Sfrp5;Tppp3	Eltd1;Zeb2;Smoc1;Ablim1;Tns1;Lcp1;Tgif1;Wisp2;Ppp1r3c;Ccnd2;Gnai1;Prmt2;Coro1a;Rab31;Fads3;App;H2-Eb1;Prkar2b;Btg1;Cebpd;Hspb7;Pdk4;Dmrt2;Kirrel;Sp100;Ntrk2;Syk;Sik2;Apcdd1;Acta2;Myh6;Kctd10;Fkbp5;Plin1;Hp;Htra3;Xirp1;Csrp3;Erbb2ip;Smtnl1;Lgals12;S100a11;Prelp;Lmod2;Adipoq;Eid1;Ddit4;Sorbs1;Yy1;Npr3;Ankrd2;Nid1;Optn;Icosl;Igkc;Edem1;Ascc3;Igfbp3;Ctnna1;Hspa1a;Parva;Atp2a2;Egln3;Hmha1;Mfge8;Utrn;C…	Crip2;Tsc22d1;Cyp3a44;Notch1;Cdc42ep2;Tsku;Zbtb38;Rita1;Jade2;Rsad2;Inhbe;Peo1;Mafb;Sytl1;Sult2a3;Sbno2;Cyp17a1;Mypop;Apoa4;Slc25a25;Cdkn1a;Mllt6;Mlxip;Sept9;Gga2;Hk1;Agk;Cda;Sirpa;Clstn3;Paqr7;Sik1;Isg15;Sdc3;Celsr1;Vnn1;Oasl1;Ckb;Abcd4;Axl;Megf8;Slc22a5;Endod1;Znfx1;Pim1;Xpnpep3;Anks1;Lpin1;Gadd45g;Rreb1;Mgll;Lrp5;Bahd1;Slc12a7;Cbx4;Chrna2;Hist1h1c;Arl4d;Mup17;Nrros;Nrp2;Sh3pxd2a;Ighm;Plin5;Pdp…
GO:0007154	cell communication	BP	2588	0.0714297	0.0100577	0.000590703	0.190295	Dock8;Pdk4;Sfrp5;Sema3f;Mt2;Thbs2;Peg10;Adm;Adap2;Slc11a1;Gpc1;Mt1	Lhx5;Glra1;Cyp26b1;Th;Cited1;Ddc;Sfrp5;Rnd1;Gjc2;Avpi1;Akr1b3;Klk6;Agt;Rhog;Rbm38;Wnt3;Cdkn1a;Cldn11;Vamp1;Rassf4;Fzd9;Ret;Arhgap24;Gjb1;Pomc;Efna1;Rab37;Phlda3;Arrdc2;Olig2	Slit3;Coro1a;Smoc1;Tgif1;Htra3;Apcdd1;Cxcl13;Pdk4;Igfbp3;Oxtr;Optn;Dlc1;Sfrp5;Map4k4;Il6ra;Angptl4;Syk;Ntrk2;Lgals12;Wwtr1;Pmepa1;Sik2;Hmha1;Sparc;Tnfrsf12a;Slc9a1;Cd79b;Lep;Eltd1;Akap12;Arntl;Zeb2;Bcar3;Sorbs1;Abra;Cat;Cdc42ep1;Thbs2;Prmt2;Gnai1;Ddit4;Lcp1;Mbp;Rab31;Prkcdbp;Myh6;Adipoq;Npr3;Rcan3;Trim12c;Thbs1;Ctnna1;Smurf2;Sptbn1;App;Serpine1;Atp2a2;Ppfibp1;Icosl;Sncg	Rsad2;Megf8;Rita1;Mgll;Lrp5;Axl;Vnn1;Jade2;Plin5;Notch1;Gadd45g;Slc9a1;Celsr1;Tlr12;Mmrn2;Nrp2;Cdkn1a;Paqr7;Chrna2;Agk;Sik1;Anks1;Tsku;Clstn3;Arl4d;Ighm
GO:0004857	enzyme inhibitor activity	MF	155	1	0.255014	0.00081499	0.195153		Agt;Cdkn1a	Angptl4;Serpine1;Serpina3c;Smtnl1;Itih5;Timp4;Serpina3n;App;Prkar2b	Serpinb1a;Cdkn1a;Notch1
GO:0070887	cellular response to chemical stimulus	BP	986	0.188188	0.692538	4.52646e-05	0.199356	Peg10;Mt1;Ccl6;Pdk4;Gpc1	Akr1b3;Cited1;Spp1;Ret;Rhog;Agt	Serpine1;Smurf2;Parva;H2-Ab1;Sparc;Sorbs1;Sod3;Pmepa1;Cxcl13;Adipoq;Fbln5;Map4k4;Fbxo32;Slc9a1;Ntrk2;Sik2;Slit3;Thbs1;Prmt2;Il6ra;Hp;Gbp6;Coro1a;Cat;Htra3;Ctnna1;Pdk4;Rab31;Lep;Ddit4;Syk;Trim63;Arntl	As3mt;Lpin1;Lrp5;Paqr7;Slc9a1;Mmrn2;Ifit1;Vnn1;Nrp2;Axl;Notch1;Apoa4
GO:0005515	protein binding	MF	4601	0.24595	0.459097	2.26538e-11	0.199908	Acta2;Hspb7;Wisp2;Palld;Ccl6;Thbs2;Slc11a1;Ehd3;Adm;Pcolce2;Arid2;Sorbs2;Ercc2;Mrc2;Gpc1;Sfrp5	Fzd9;H2-D1;Pvalb;Iscu;Wnt3;Tsc22d3;Olig2;Isg15;Rab37;Pomc;Limk1;Vamp1;Cited1;Ddc;Efna1;Spp1;Ret;Agt;Hspa1a;Epn3;Gjb1;Rhog;Anln;Th;Cldn11;Rnd1;Hmga1;C1ql2;Sh3bgr;Cdkn1a;Tppp3;Mrap2;Sfrp5	Lcp1;Cdc42ep1;Acta2;Apcdd1;App;Htra3;Gnai1;Hspb7;Tns1;Zbtb16;Fkbp5;Igfbp3;Coro1a;Syk;Ntrk2;Prx;Prkar2b;Utrn;Ppp1r3c;H2-Eb1;Adipoq;Ddit4;Plin1;Cebpd;Wisp2;Kctd10;Kirrel;Ccnd2;Tpm3;Zeb2;Akap12;Myom3;Hspa1b;Arpp21;Nipbl;Ldhb;Mpz;Parva;Sp100;Btg1;Cat;Prkcdbp;Erbb2ip;Ctnna1;S100a11;Myh6;Eltd1;Slc9a1;Mfge8;Rcan3;Npr3;Tnfrsf12a;H2-Ab1;Sorbs1;Arntl;Csrp3;Lep;Sptbn1;Cd79b;Lpl;Atp2a2;Smtnl1;Tpm4;Icosl;Myoz…	Rita1;Cdc42ep2;Lpin1;Slc12a7;Isg15;Crip2;Celsr1;Tsc22d1;Mafb;Sytl1;Slc22a5;Cda;Pim1;Nrp2;Mgll;Sik1;Slc9a1;Cbx4;Zbtb38;Tsku;Hk1;Notch1;Ighm;Mypop;Nrros;Axl;Ckb;Sirpa;Mlxip;Sh3pxd2a;Hist1h1c;Apoa4;Inhbe;Anks1;Rsad2;Sbno2;Gadd45g;Gga2;Sdc3;Plin5;Cdkn1a;Lrp5;Clstn3;Peo1;Ifit1
GO:0044707	single-multicellular organism process	BP	2898	0.00178759	0.0284835	4.52215e-07	0.201404	Acta2;Palld;Sfrp5;Dock8;Gpc1;Trpv2;Adm;Peg3;Ercc2;Sema3f;Thbs2;Mrc2;Adap2;Alg10b;Pdk4;Slc11a1;Peg10	Cyp26b1;Lhx5;Wnt3;Agt;Akr1b3;Th;Cldn11;Sfrp5;Adamts2;Cited1;Limk1;Efna1;Tsc22d3;Arhgap24;Hapln2;Mrap2;Dio3;Olig2;Klk6;Isg15;Fzd9;Dmp1;Lrig1;Ret;Pomc;Glra1;Tanc1;Spp1;Rnd1;Anln	Ankrd2;Xirp1;Smoc1;Myh7;Npr3;Zfp36l1;Thbs1;Trim63;Ndrg1;Ntrk2;Slit3;Ighd;Cebpd;Arntl;Zbtb16;App;Hp;Coro1a;Acta2;Sfrp5;Bcar3;Ctnna1;Adipoq;Kirrel;Apcdd1;Myh6;Syk;Csrp3;Mfge8;Icosl;Smtnl1;Acp5;Map4k4;Slc9a1;Top1;Ablim1;Tnfrsf12a;Sparc;Atp2a2;Wwtr1;Zeb2;Dmrt2;Oxtr;Tgif1;Hspa1b;Lpl;Igkc;Lep;Nipbl;Atp1a1;H2-Aa;Prkar2b;Serpine1;Peg3;Parva;Ddit4;Il6ra;Anxa4;Lox;Yy1;Fbxo32;Thbs2;Mrc2;Igfbp3;Aoc3;Maff;Cxc…	Apoa4;Tsku;Slc25a25;Nrp2;Sbno2;Notch1;Celsr1;Slc22a5;Megf8;Rita1;Crip2;Slc9a1;Lrp5;Ncmap;Rsad2;Isg15;Sirpa;Mmrn2;Clstn3;Gadd45g;Mgll;Xpnpep3;Paqr7;Fam83h;Mafb;Sik1;Hist1h4i;Vnn1;Axl
GO:0031589	cell-substrate adhesion	BP	176	1	0.0313018	2.57024e-05	0.202711		Efna1;Agt;Dmp1;Spp1	Sorbs1;Ccdc80;Parva;Serpine1;Smoc1;Dlc1;Thbs1;Tnfrsf12a;Ppfibp1;Utrn;Nid1;Coro1a	Axl;Notch1;Sirpa
GO:1901652	response to peptide	BP	170	0.413821	0.685238	0.00059353	0.202711	Pdk4	Cited1	Adipoq;Sorbs1;Atp2a2;Serpina3c;Sik2;Rab31;Pdk4;Slc9a1;Serpina3n;Lep	Lpin1;Slc9a1;Notch1
GO:0036293	response to decreased oxygen levels	BP	113	1	0.542745	0.00052149	0.218051		Th	Cat;Oxtr;Ddit4;Prmt2;Acot2;Sod3;Slc9a1;Egln3	Notch1;Slc9a1
GO:0070482	response to oxygen levels	BP	118	1	0.552113	0.000709205	0.232732		Th	Ddit4;Egln3;Acot2;Cat;Prmt2;Oxtr;Sod3;Slc9a1	Notch1;Slc9a1
GO:0032501	multicellular organismal process	BP	2960	0.00231324	0.0212701	1.17333e-06	0.241248	Sema3f;Acta2;Pdk4;Trpv2;Adap2;Sfrp5;Palld;Ercc2;Mrc2;Thbs2;Adm;Peg3;Slc11a1;Peg10;Dock8;Gpc1;Alg10b	Cyp26b1;Fzd9;Wnt3;Limk1;Adamts2;Dmp1;Spp1;Lhx5;Cldn11;Hapln2;Pomc;Tsc22d3;Olig2;Ret;Agt;Hmga1;Sfrp5;Th;Glra1;Mrap2;Lrig1;Dio3;Rnd1;Cited1;Arhgap24;Akr1b3;Tanc1;Klk6;Isg15;Anln;Efna1	App;Syk;Acp5;Wwtr1;Arntl;Coro1a;Zfp36l1;Smoc1;Bcar3;Apcdd1;Xirp1;Tnfrsf12a;Igfbp3;Lep;Npr3;Atp1a1;Thbs1;Acta2;Ntrk2;Sparc;Pdk4;Nipbl;Slit3;Kirrel;Atp2a2;Ighd;Serpine1;H2-Ab1;Ablim1;Cat;Yy1;Cebpd;Sfrp5;Adipoq;Mfge8;Csrp3;Tgif1;Myh6;Btg1;Hspa1b;Trim63;Il6ra;Zeb2;Zbtb16;Ankrd2;Slc9a1;Igkc;Optn;Top1;Mrc2;Hp;Thbs2;Parva;Angptl4;Mbp;Peg3;Anxa4;Oxtr;Fbxo32;Dmrt2;Prkar2b;Ctnna1;Dlc1;Aoc3;Ddit4;Sncg;Icosl…	Slc22a5;Sbno2;Rita1;Apoa4;Nrp2;Crip2;Mafb;Axl;Sirpa;Slc25a25;Mmrn2;Megf8;Rsad2;Paqr7;Lrp5;Gadd45g;Notch1;Slc9a1;Xpnpep3;Celsr1;Ncmap;Fam83h;Isg15;Clstn3;Sik1;Vnn1;Mgll;Hist1h4i;Tsku
GO:0005576	extracellular region	CC	2289	0.0779579	0.000612637	1.23527e-05	0.247339	Ccl6;Wisp2;Acta2;Pcolce2;Prelp;Sema3f;Thbs2;Gpc1;Mest;Sfrp5;Adm	Efna1;Adamts2;Ddc;Wnt3;Pvalb;Hapln2;Rhog;Akr1b3;Psmb5;Phlda3;Fibin;Klk6;Pomc;Cpm;Spp1;Epn3;Cldn11;Gpt;Dmp1;H2-D1;Sfrp5;Enho;Agt;C1ql2;Hspa1a;Isg15;Tnfaip6;Tppp3	Angptl4;Thbs1;Sod3;Coro1a;Timp4;Sparc;Gbp6;Igfbp3;Htra3;Wisp2;Lep;Adamts5;Lcp1;Acta2;Mfge8;Lpl;Itih5;Nid1;Atp1a1;Cxcl13;Prkar2b;Hp;Tuba1a;Aoc3;Dstn;Tpm3;Utrn;Cobll1;Fam129a;Slit3;Gnai1;Serpina3c;Prelp;Ccdc80;Cd79b;Cat;Smoc1;Npr3;Fbln5;Sncg;Nipbl;H2-Eb1;Lox;Acot2;Car4;Thbs2;Adipoq;Ndrg1;Serpine1;Serpina3n;Icosl;Sfrp5;Kirrel;Ldhb;App;Il6ra;Slc9a1;Glb1l2;Anxa4;Sptbn1;Hspa1a	Apoa4;Endod1;Rreb1;Sirpa;Ckb;Zbtb38;Slc22a5;Mup17;Ighm;Serpinb1a;Mmrn2;Tsku;Inhbe;Jade2;Serinc2;Sytl1;Megf8;Fam65a;Vnn1;Axl;Slc25a25;Clstn3;Hist1h4i;Slc9a1;Isg15
GO:0040011	locomotion	BP	737	0.187893	0.18805	0.000479909	0.250445	Sema3f;Sorbs2;Ccl6;Dock8	Wnt3;Rhog;Tnfaip6;Ret;Efna1;Agt;Spp1;Arhgap24	Coro1a;Sorbs2;Syk;Igfbp3;Dlc1;Serpine1;Thbs1;Adipoq;Parva;Ctnna1;Ddit4;Aoc3;Ntrk2;Zeb2;Slit3;Apcdd1;App;Lep;Ablim1;Lcp1;Cxcl13;Tnfrsf12a;Tns1;Sparc	Nrp2;Megf8;Notch1;Mmrn2;Celsr1;Lrp5;Axl;Sirpa
GO:0005615	extracellular space	CC	536	0.0956283	0.0212334	3.28442e-07	0.250566	Ccl6;Acta2;Adm;Wisp2	Agt;Wnt3;Hspa1a;Pomc;Spp1;Akr1b3;Tnfaip6;Klk6	Hp;Sod3;Angptl4;Serpine1;Lpl;Igfbp3;Cat;Thbs1;Serpina3n;App;H2-Eb1;Mfge8;Fbln5;Slit3;Lep;Hspa1a;Cxcl13;Il6ra;Acta2;Lcp1;Timp4;Adipoq;Aoc3;Wisp2;Sparc;Serpina3c	Apoa4;Ighm;Serpinb1a;Zbtb38;Mmrn2;Tsku;Axl
GO:0042221	response to chemical	BP	1440	0.0091215	0.220114	1.05093e-07	0.253215	Pdk4;Sema3f;Ccl6;Slc11a1;Mt2;Adm;Mest;Mt1;Gpc1;Peg10	Akr1b3;Ret;Gjc2;Agt;Spp1;Isg15;Wnt3;Cited1;Th;Ddc;Efna1;Bst2;Rhog	Cxcl13;Map4k4;Parva;Gbp6;Sparc;Atp2a2;Pmepa1;App;Slit3;Il6ra;Serpina3c;Pdk4;Atp1a1;Fbxo32;Syk;Htra3;Sorbs1;Prmt2;Thbs1;Hp;Ntrk2;Aoc3;Coro1a;Lox;Rab31;Arntl;Smtnl1;Lep;Edem1;Oxtr;Ctnna1;Cat;Ablim1;Mbp;H2-Eb1;H2-Aa;Sik2;Dusp18;Adipoq;Trim63;Sod3;Ddit4;Fbln5;Acp5;Slc9a1;Smurf2;Serpine1;H2-Ab1;Serpina3n	Megf8;Notch1;Mmrn2;Lrp5;As3mt;Apoa4;Nrp2;Slc22a5;Isg15;Vnn1;Ifit1;Slc25a25;Axl;Lpin1;Paqr7;Slc9a1
GO:0006950	response to stress	BP	1618	0.0225501	0.113695	8.79001e-05	0.256808	Hspb7;Sfrp5;Mustn1;Mt2;Trpv2;Pdk4;Adm;Slc11a1;Ercc2;Mt1	Cited1;Th;Sfrp5;Akr1b3;Agt;Bst2;Isg15;Cdkn1a;Rbm38;Phlda3;Hspa1a;Psmb5;Tsc22d3;Arhgap24;Ret	Oxtr;Hspb7;Arpp21;Angptl4;Lcp1;Syk;Acp5;Sod3;Sfrp5;Hspa1b;Ddit4;Adamts5;Ascc3;Zeb2;Cxcl13;Tnfrsf12a;Serpine1;Trim12c;Pdk4;Rnasel;Cat;Map4k4;Slc9a1;Lox;App;Hspa1a;H2-Eb1;Thbs1;Nuak1;Adipoq;Serpina3n;Arntl;Yy1;Egln3;Acot2;Hp;Nipbl;Aoc3;Gbp6;Fbln5;Prmt2;H2-Aa;Edem1;Optn;Fam129a;H2-Ab1	Mgll;Vnn1;Apoa4;Hk1;Sbno2;Gadd45g;Axl;Oasl1;Isg15;Cdkn1a;Notch1;Slc9a1;Rsad2;Nrros;Ighm;Tlr12;Celsr1;Ifit1
GO:0051094	positive regulation of developmental process	BP	523	0.212602	0.0964668	0.00029396	0.259497	Thbs2;Trpv2;Adm	Wnt3;Isg15;Ret;Limk1;Olig2;Cyp26b1;Agt	Zbtb16;Adipoq;Btg1;Tgif1;H2-Aa;Serpine1;Thbs2;Oxtr;Arntl;Dmrt2;Syk;Lep;Tnfrsf12a;Wwtr1;Igfbp3;Lpl;Cebpd;Zeb2;Thbs1;Ntrk2	Megf8;Notch1;Isg15;Vnn1;Axl;Lrp5
GO:0071310	cellular response to organic substance	BP	764	0.43068	0.7959	0.000279028	0.266811	Pdk4;Peg10;Gpc1	Cited1;Akr1b3;Agt;Ret	Gbp6;Map4k4;Coro1a;Ntrk2;Fbxo32;Pdk4;Ddit4;Il6ra;Htra3;Cxcl13;Adipoq;Thbs1;Sparc;Serpine1;Slc9a1;Rab31;Sorbs1;Sik2;Pmepa1;Trim63;Smurf2;Prmt2;Ctnna1;Lep;H2-Ab1;Slit3	Lrp5;Lpin1;Axl;Slc9a1;Ifit1;Notch1;Mmrn2;Nrp2;Paqr7
GO:0051716	cellular response to stimulus	BP	2948	0.0887326	0.355816	3.1388e-06	0.269011	Dock8;Sfrp5;Sema3f;Ccl6;Ercc2;Peg10;Mt2;Adm;Mt1;Pdk4;Adap2;Gpc1;Slc11a1	Ret;Avpi1;Agt;Sfrp5;Cyp26b1;Wnt3;Glra1;Fzd9;Cited1;Klk6;Rhog;Rbm38;Akr1b3;Pomc;Arhgap24;Spp1;Rab37;Rnd1;Efna1;Cdkn1a;Rassf4;Arrdc2;Hspa1a;Phlda3	Cdc42ep1;Ctnna1;Ntrk2;Gnai1;Smoc1;Rab31;Htra3;Gbp6;Smurf2;Sorbs1;Sfrp5;Apcdd1;App;Thbs1;Lcp1;Akap12;Sik2;Tnfrsf12a;Coro1a;Prmt2;Cd79b;Syk;Lep;Oxtr;Parva;Eltd1;Sod3;Rcan3;Arpp21;Hspa1b;Bcar3;Atp1a1;Serpine1;Adipoq;Hmha1;Cat;Slit3;Npr3;Map4k4;Trim12c;Sparc;Wwtr1;Ddit4;Myh6;Dlc1;Hp;Abra;Igfbp3;Pmepa1;Lgals12;Angptl4;H2-Ab1;Fbln5;Nipbl;Optn;Egln3;Fbxo32;Prkcdbp;Trim63;Atp2a2;Tgif1;Pdk4;Fam129a;Yy1;Cx…	Rita1;Axl;Notch1;Megf8;Gadd45g;Celsr1;Nrp2;Sik1;Apoa4;Jade2;Mgll;Ighm;Lpin1;As3mt;Lrp5;Plin5;Tlr12;Mmrn2;Cdkn1a;Agk;Anks1;Vnn1;Rsad2;Paqr7;Chrna2;Arl4d;Tsku;Ifit1;Slc9a1
GO:0016043	cellular component organization	BP	2907	0.0750726	0.105263	0.00016271	0.274419	Trpv2;Sema3f;Wisp2;Palld;Thbs2;Nedd9;Slc11a1;Ercc2;Gpc1;Ehd3;Arid2;Adm;Sorbs2	Efna1;Wnt3;Hapln2;Ret;Iscu;Arhgap24;Gjb1;Glra1;Dmp1;Vamp1;Limk1;Anln;Cited1;Hspa1a;Klk6;Adamts2;Kcng4;Cdkn1a;Tuba1c;Rhog;Agt;Bst2;C1ql2;Rnd1;Tanc1;Cyp26b1;Tppp3	Slit3;Adipoq;Myh6;Mpz;Sptbn1;Parva;Wisp2;Ablim1;Kirrel;Prkcdbp;Ctnna1;Lcp1;Optn;Sncg;Pmepa1;Coro1a;Rab31;Xirp1;Sorbs1;Utrn;Htra3;Kctd10;App;Map4k4;Lmod2;Smoc1;Syk;Serpine1;Ndrg1;Dstn;Dram1;Hspa1a;Ntrk2;Eid1;Thbs1;Tns1;Zeb2;Ccdc80;Cat;Thbs2;Dusp18;Top1;Tuba1a;Hspa1b;Fbln5;Tnfrsf12a;Igfbp3;Nid1;Tuba1c;Prmt2;Palmd;Nedd9;Cxcl13;Yy1;Cdc42ep1;Angptl4;Mbp;Csrp3;Nipbl;Wwtr1;Dlc1;Mfge8;Sparc;Oxtr;Lox;Ddit…	Cdc42ep2;Slc22a5;Notch1;Bahd1;Nrp2;Peo1;Cda;Celsr1;Ncmap;Jade2;Hist1h1c;Sept9;Megf8;Lpin1;Sirpa;Axl;Hist1h4i;Apoa4;Cbx4;Ighm;Clstn3;Cdkn1a;Lrp5;Tsku;Mgll;Chrna2;Slc9a1;Cidec;Plin5
GO:0050896	response to stimulus	BP	3660	0.0266556	0.0373418	1.14131e-09	0.274763	Sfrp5;Hspb7;Ccl6;Slc11a1;Pdk4;Sema3f;Mt2;Ercc2;Trpv2;Mustn1;Adap2;Dock8;Mt1;Gpc1;Adm;Peg10;Mest	Sfrp5;Avpi1;Arhgap24;Th;Glra1;Cyp26b1;Cdkn1a;Hspa1a;Wnt3;Psmb5;Spp1;Agt;Fzd9;Rbm38;Akr1b3;Tsc22d3;Efna1;H2-D1;Gjc2;Rhog;Isg15;Klk6;Rab37;Rassf4;Ret;Tanc1;Cited1;Bst2;Rnd1;Ddc;Fv1;Pomc;Arrdc2;Mrap2;Phlda3	Gbp6;Cdc42ep1;Sfrp5;Slit3;Rab31;Ctnna1;Gnai1;Slc9a1;Hspb7;H2-Eb1;Bcar3;Ablim1;Smoc1;Sparc;App;Apcdd1;Thbs1;Ighd;Lcp1;Hspa1a;H2-Ab1;Arntl;Serpina3c;Ntrk2;Coro1a;Prmt2;Pdk4;Eltd1;Tnfrsf12a;Angptl4;Sorbs1;Cd79b;Optn;Arpp21;Parva;Map4k4;Csrp3;Syk;Dusp18;Wwtr1;Sod3;Nipbl;Sik2;Hmha1;Pmepa1;Fam129a;Il6ra;Hspa1b;Adipoq;H2-Aa;Hp;Icosl;Adamts5;Htra3;Trim12c;Rcan3;Tgif1;Trim63;Igfbp3;Cxcl13;Lep;Prkar2b;Egln…	Rita1;Nrp2;Slc9a1;Apoa4;Sbno2;Slc22a5;Cdkn1a;Gadd45g;Megf8;Paqr7;Notch1;Mmrn2;Hk1;Lpin1;Lrp5;Axl;As3mt;Jade2;Isg15;Oasl1;Slc25a25;Anks1;Rsad2;Mgll;Sik1;Agk;Vnn1;Plin5;Celsr1;Tsku;Ighm;Ifit1;Chrna2;Nrros;Arl4d;Tlr12
GO:1901701	cellular response to oxygen-containing compound	BP	387	0.348471	0.755719	0.000195514	0.280196	Pdk4;Mt1	Ret;Akr1b3	Trim63;Fbln5;Hp;Pdk4;Rab31;Adipoq;Sorbs1;Fbxo32;Sod3;Cat;Gbp6;Sik2;Map4k4;Slc9a1;Lep;Serpine1;Ctnna1	Lrp5;Axl;Apoa4;Lpin1;Slc9a1
GO:1901681	sulfur compound binding	MF	128	0.000596865	0.565266	0.00507759	0.308605	Thbs2;Gpc1;Prelp;Pcolce2	Glra1	Thbs2;Thbs1;Ccdc80;App;Lpl;Cxcl13;Prelp	Nrp2;Sult2a3
GO:0006928	cellular component movement	BP	798	0.218138	0.258085	4.36951e-05	0.309959	Sema3f;Ccl6;Dock8;Sorbs2	Wnt3;Agt;Ret;Tnfaip6;Arhgap24;Spp1;Rhog;Efna1	Atp1a1;Myh7;Tns1;Myh6;Dstn;Thbs1;Igfbp3;Slit3;App;Apcdd1;Aoc3;Cxcl13;Lep;Sparc;Ntrk2;Ctnna1;Ddit4;Sorbs2;Coro1a;Dlc1;Serpine1;Adipoq;Zeb2;Parva;Tnfrsf12a;Ablim1;Syk;Lcp1	Megf8;Sirpa;Notch1;Mmrn2;Nrp2;Axl;Celsr1;Lrp5
GO:0048518	positive regulation of biological process	BP	2537	0.695726	0.0315492	0.000134908	0.314583	Palld;Ercc2;Trpv2;Adm;Slc11a1;Thbs2;Arid2	Rbm38;Akr1b3;Avpi1;Lhx5;Wnt3;Klk6;H2-D1;Mrap2;Glra1;Dmp1;Spp1;Rhog;Ret;Efna1;Cdkn1a;Cited1;Olig2;Dio3;Tnfaip6;Agt;Cyp26b1;Isg15;Limk1;Pomc;Phlda3;Hmga1	Ccnd2;Hp;H2-Aa;Ntrk2;Ighd;Smoc1;Kirrel;Nipbl;H2-Ab1;Arntl;Prmt2;Adipoq;Lpl;Ctnna1;Thbs1;Cebpd;Coro1a;Cd79b;Sdpr;Atp1a1;Optn;Abra;Mfge8;Tgif1;Bcar3;Oxtr;Rnasel;Cxcl13;Ddit4;Tnfrsf12a;Slc9a1;Trim12c;Dlc1;Prkcdbp;Syk;App;Zeb2;Sorbs1;Il6ra;Ndrg1;Wwtr1;Icosl;Angptl4;Smtnl1;Lep;Ccdc80;Serpine1;Igfbp3;Utrn;Thbs2;Yy1;Akap12;Fam129a;Dstn;Btg1;Ablim1;Cat;Aoc3;Sparc;Dmrt2;Nid1;Cdc42ep1;Zbtb16	Zbtb38;Cdc42ep2;Axl;Tsc22d1;Gadd45g;Crip2;Notch1;Lpin1;Apoa4;Ighm;Ncmap;Slc9a1;Sbno2;Lrp5;Sirpa;Pim1;Cdkn1a;Cyp17a1;Slc22a5;Vnn1;Rsad2;Plin5;Megf8;Mafb;Isg15
GO:0030029	actin filament-based process	BP	359	0.668906	0.257701	0.000296175	0.33999	Sorbs2	Limk1;Bst2;Rhog;Rnd1	Parva;Dstn;Lmod2;Dlc1;Sorbs1;Sptbn1;Coro1a;Csrp3;Myh6;Lcp1;Xirp1;Myh7;Sorbs2;Prkcdbp;Kirrel;Atp1a1	Cdc42ep2;Lpin1;Celsr1;Sirpa
GO:0065008	regulation of biological quality	BP	1606	0.00154205	0.00677626	0.000288487	0.34579	Mt2;Mt1;Acta2;Ehd3;Pdk4;Trpv2;Adm;Ercc2;Mest;Sema3f;Slc11a1;Thbs2	Rbm38;Cldn11;Glra1;Cyp26b1;Hspa1a;Pomc;Wnt3;Spp1;Th;Agt;Limk1;Pvalb;Dio3;Akr1b3;Isg15;Glrx5;Olig2;Tsc22d3;Vamp1;Ret;Mrap2	Serpine1;Zfp36l1;Smtnl1;Cdc42ep1;Cxcl13;Adipoq;Atp1a1;Slc9a1;Acta2;Hspa1b;Csrp3;Sptbn1;Sncg;Dstn;Thbs1;Lep;Hspa1a;App;Pdk4;Lmod2;Xirp1;Myh6;Npr3;Ntrk2;Tnfrsf12a;Kirrel;Myh7;Palmd;Parva;Dlc1;Map4k4;Car4;Oxtr;Angptl4;Lpl;Coro1a;Syk;Acp5;Arntl;Thbs2;Mbp;Atp2a2;Aoc3	Ckb;Plin5;Celsr1;Slc9a1;Cdc42ep2;Mafb;Slc22a5;Apoa4;Hk1;Slc12a7;Axl;Lrp5;Isg15;Megf8;Cyp17a1;Mgll
GO:0004867	serine-type endopeptidase inhibitor activity	MF	37	1	0.156148	6.22333e-05	0.346455		Agt	Serpina3n;App;Itih5;Serpina3c;Serpine1	Serpinb1a
GO:0009725	response to hormone	BP	315	0.619194	0.653614	0.00018621	0.346811	Pdk4	Cited1;Spp1	Lox;Lep;Prmt2;Fbxo32;Pdk4;Adipoq;Rab31;Sorbs1;Atp2a2;Sik2;Slc9a1;Trim63;Oxtr;Serpina3n;Serpina3c	Lpin1;Paqr7;Notch1;Slc9a1
GO:0001725	stress fiber	CC	52	0.143548	1	1.74094e-06	0.349083	Palld		Lcp1;Sorbs1;Ablim1;Myh6;Tpm4;Dlc1;Tpm3;Myh7	2009-09-01
GO:0032432	actin filament bundle	CC	53	0.146103	1	2.04211e-06	0.355718	Palld		Tpm3;Tpm4;Myh6;Lcp1;Ablim1;Dlc1;Myh7;Sorbs1	2009-09-01
GO:0030856	regulation of epithelial cell differentiation	BP	53	1	0.327761	0.00027348	0.356513		Cited1	Adipoq;Arntl;Maff;Wwtr1;Zeb2;Btg1	Notch1
GO:0071840	cellular component organization or biogenesis	BP	3014	0.0954291	0.143344	0.00031001	0.361344	Wisp2;Sema3f;Nedd9;Ehd3;Palld;Thbs2;Ercc2;Gpc1;Adm;Trpv2;Slc11a1;Sorbs2;Arid2	Adamts2;Hspa1a;Hapln2;Agt;Gjb1;Efna1;Tuba1c;Limk1;Arhgap24;Dmp1;Rhog;Tanc1;Vamp1;Kcng4;Cyp26b1;Glra1;Cited1;Wnt3;Klk6;Iscu;C1ql2;Bst2;Cdkn1a;Ret;Rnd1;Anln;Tppp3	Eid1;Rnasel;Ddit4;Angptl4;Coro1a;Adipoq;Sorbs1;Oxtr;Nipbl;Ctnna1;Hspa1a;Lcp1;Sparc;Syk;Wisp2;Ntrk2;Kirrel;Htra3;Sptbn1;Smoc1;Prkcdbp;Hspa1b;Sncg;Prmt2;Tnfrsf12a;Thbs1;Zeb2;Wwtr1;Tns1;App;Lpl;Tuba1c;Optn;Mbp;Kctd10;Serpine1;Myh6;Nedd9;Fbln5;Igfbp3;Lmod2;Rab31;Dstn;Top1;Cdc42ep1;Yy1;Mpz;Lox;Ndrg1;Dusp18;Dram1;Thbs2;Ablim1;Csrp3;Mfge8;Slit3;Xirp1;Slc9a1;Utrn;Parva;Tuba1a;Palmd;Ccdc80;Nid1;Pmepa1;Cat…	Megf8;Cdc42ep2;Sept9;Bahd1;Hist1h1c;Sirpa;Jade2;Cda;Celsr1;Ncmap;Slc22a5;Lrp5;Slc9a1;Peo1;Mgll;Axl;Clstn3;Plin5;Nrp2;Tsku;Lpin1;Cdkn1a;Ighm;Notch1;Apoa4;Chrna2;Hist1h4i;Cbx4;Cidec
GO:0010033	response to organic substance	BP	1042	0.099173	0.447651	8.10638e-06	0.376854	Pdk4;Mest;Peg10;Slc11a1;Gpc1;Adm	Ret;Cited1;Spp1;Akr1b3;Isg15;Bst2;Th;Agt	Serpina3n;Thbs1;Oxtr;Pmepa1;Sorbs1;Sik2;H2-Ab1;Lep;Serpina3c;Coro1a;Il6ra;Pdk4;Smurf2;Lox;Edem1;Syk;H2-Eb1;Map4k4;Acp5;Slit3;Ddit4;Cxcl13;Htra3;Sparc;Ctnna1;Fbxo32;Slc9a1;H2-Aa;Ntrk2;Atp2a2;Gbp6;Rab31;Trim63;Adipoq;Serpine1;Prmt2	Mmrn2;Apoa4;Lrp5;Axl;Isg15;Paqr7;Lpin1;Notch1;Slc9a1;Nrp2;Ifit1
GO:0042641	actomyosin	CC	59	0.16378	1	5.6673e-06	0.381595	Palld		Myh7;Myh6;Lcp1;Sorbs1;Tpm3;Tpm4;Ablim1;Dlc1	2009-09-01
GO:0044421	extracellular region part	CC	2130	0.198443	0.00949919	3.4993e-05	0.385383	Wisp2;Ccl6;Prelp;Pcolce2;Mest;Gpc1;Adm;Thbs2;Acta2	Pvalb;Hapln2;Akr1b3;Cldn11;Klk6;Cpm;Psmb5;H2-D1;Spp1;Wnt3;Adamts2;Efna1;Phlda3;Epn3;Hspa1a;Rhog;Dmp1;Agt;Gpt;Pomc;Ddc;Tnfaip6;Tppp3	Sncg;Cxcl13;Ldhb;Slc9a1;Lpl;Angptl4;Wisp2;Car4;Kirrel;Cd79b;Nipbl;Il6ra;Lcp1;Lep;Serpina3c;Tpm3;Dstn;Igfbp3;Sod3;Smoc1;H2-Eb1;Adamts5;Gbp6;Sptbn1;Atp1a1;Mfge8;Fam129a;Hp;Prelp;Nid1;Prkar2b;Thbs1;Utrn;App;Ndrg1;Icosl;Serpine1;Gnai1;Lox;Acot2;Coro1a;Ccdc80;Adipoq;Thbs2;Hspa1a;Tuba1a;Anxa4;Timp4;Acta2;Slit3;Aoc3;Sparc;Npr3;Cobll1;Serpina3n;Cat;Fbln5	Apoa4;Slc9a1;Ckb;Jade2;Mmrn2;Zbtb38;Ighm;Serinc2;Axl;Endod1;Sytl1;Rreb1;Vnn1;Sirpa;Tsku;Hist1h4i;Serpinb1a;Fam65a;Slc25a25;Megf8;Slc22a5;Clstn3
GO:0034097	response to cytokine	BP	246	0.562285	0.195753	1.04243e-05	0.428727	Slc11a1	Bst2;Cited1;Isg15	Lep;Cxcl13;Serpine1;Serpina3n;Prmt2;H2-Aa;Coro1a;Serpina3c;Acp5;Il6ra;Gbp6;H2-Eb1;Slit3;Adipoq;H2-Ab1	Axl;Isg15;Ifit1
GO:1901700	response to oxygen-containing compound	BP	574	0.0324314	0.375684	0.000134664	0.42957	Mest;Slc11a1;Adm;Mt1;Pdk4	Akr1b3;Th;Cited1;Spp1;Ret	Gbp6;Serpine1;Rab31;Fbxo32;Hp;Fbln5;Sorbs1;Acp5;Lep;Serpina3n;Trim63;Serpina3c;Cat;Thbs1;Slc9a1;Adipoq;Pdk4;Sod3;Atp2a2;Map4k4;Ctnna1;Sik2	Apoa4;Notch1;Axl;Slc9a1;Lrp5;Lpin1
GO:0044763	single-organism cellular process	BP	6008	0.00336699	0.0176622	2.77401e-05	0.435529	Wisp2;Dock8;Sema3f;Trpv2;Slc11a1;Pdk4;Sfrp5;Palld;Gpc1;Prelp;Ercc2;Arid2;Ccl6;Mt2;Thbs2;Mrc2;Peg3;Hnrnpa3;Peg10;Adap2;Adm;Mt1;Alg10b;Slco3a1;Sorbs2;Nedd9	Lhx5;Cyp26b1;Carns1;Arhgap24;Agt;Cited1;Hapln2;Cdkn1a;Rbm38;Wnt3;Limk1;Slc29a4;Pvalb;Th;Akr1b3;Sfrp5;Isg15;Spp1;Dio3;Crls1;Fzd9;Hspa1a;Kcng4;Glrx5;Anln;Rab37;Glra1;Rassf4;Cldn11;Vamp1;Tnfaip6;Adamts2;Klk6;Rnd1;Mrap2;Hdc;Tsc22d3;Gjb1;Avpi1;Gjc2;Nt5m;Ret;Olig2;Tuba1c;Pomc;Bst2;Ddc;Efna1;Rhog;Tanc1;Arrdc2;Phlda3;Dmp1;Tppp3	Hp;Arntl;Htra3;Anxa4;Lcp1;Wisp2;Cdc42ep1;Zfp36l1;Apcdd1;Thbs1;Cd79b;Coro1a;Mfge8;Syk;Palmd;Serpine1;Sorbs1;Slit3;Npr3;Lmod2;Xirp1;Zbtb16;Ndrg1;Cebpd;Slc9a1;Pdk4;Hspa1b;Adipoq;Hmha1;Atp1a1;Ccnd2;Ldhb;Sfrp5;Csrp3;Bcar3;Prmt2;Gnai1;Smoc1;Fads3;Ablim1;Zeb2;Ddit4;Egln3;Prelp;Icosl;Myh6;Ppp1r3c;Dlc1;Angptl4;Dram1;Lgals12;Prkar2b;Trim12c;Map4k4;Wwtr1;Top1;Lpl;Ntrk2;Hspa1a;Akap12;Eltd1;Igkc;Cxcl13;Il6ra;…	Megf8;Apoa4;Serinc2;Nrp2;Notch1;Peo1;Cdkn1a;Rita1;Cdc42ep2;Jade2;Celsr1;Slc9a1;Vnn1;Isg15;Slc25a25;Slc12a7;Hk1;Lrp5;Clstn3;Tsc22d1;Sbno2;Tsku;Sytl1;Mgll;Abcd4;Plin5;Sik1;Sirpa;Rsad2;Mafb;Paqr7;Pim1;Hist1h4i;Ckb;Tlr12;Gadd45g;Mfsd2a;Slc22a5;Ighm;Lpin1;Ncmap;Sept9;Cyp17a1;Mmrn2;Agk;Chrna2;Slc25a45;As3mt;Cda;Cidec;Arl4d;Uck1;Axl;Slc36a1;Anks1
GO:0008201	heparin binding	MF	71	0.00133893	1	0.000132597	0.43683	Pcolce2;Thbs2;Prelp		Thbs2;App;Prelp;Thbs1;Lpl;Ccdc80;Cxcl13	Nrp2
GO:0043434	response to peptide hormone	BP	162	0.399298	0.669593	0.000399812	0.441617	Pdk4	Cited1	Sorbs1;Lep;Sik2;Atp2a2;Rab31;Pdk4;Serpina3n;Adipoq;Slc9a1;Serpina3c	Lpin1;Slc9a1
GO:0031988	membrane-bounded vesicle	CC	2086	0.170414	0.0367722	0.000549354	0.444987	Wisp2;Slc11a1;Gpc1;Mest;Thbs2;Pcolce2;Prelp;Ehd3;Acta2	Pvalb;Rhog;Hspa1a;Efna1;Vamp1;Psmb5;Epn3;Cldn11;Phlda3;Akr1b3;Spp1;Rab37;Pomc;Th;Cpm;Ddc;Gpt;Agt;H2-D1;Klk6;Tppp3	Tpm3;Nipbl;Gbp6;Anxa4;Wisp2;H2-Eb1;Cd79b;Atp1a1;Hspa1a;Car4;Kirrel;Lcp1;Fam129a;Ldhb;Igfbp3;Sptbn1;Thbs1;Hp;Prkar2b;Lpl;Hip1r;Thbs2;Utrn;Slc9a1;Syk;Serpine1;Npr3;Cobll1;Cat;Optn;Adipoq;App;Serpina3c;Prelp;Nid1;Mfge8;Acot2;Fbln5;Sncg;Dstn;Sod3;Sparc;Rab31;Tuba1a;Acta2;Icosl;Gnai1;Ctnna1;Serpina3n;Coro1a;Ndrg1;Atp2a2	Serinc2;Endod1;Slc25a25;Sirpa;Gga2;Apoa4;Mmrn2;Megf8;Ckb;Notch1;Rreb1;Jade2;Sytl1;Slc9a1;Axl;Serpinb1a;Hist1h4i;Fam65a;Clstn3;Vnn1;Slc22a5
GO:0008015	blood circulation	BP	195	0.113882	0.20098	2.31582e-05	0.455059	Adm;Acta2	Agt;Pomc;Th	Atp1a1;Csrp3;Slc9a1;Myh7;Myh6;Aoc3;Lep;Smtnl1;Acta2;Oxtr;Npr3;Atp2a2;Adipoq	Slc9a1;Lrp5
GO:0008217	regulation of blood pressure	BP	78	0.214694	0.120599	3.42257e-05	0.457587	Acta2	Pomc;Agt	Myh6;Lep;Aoc3;Npr3;Atp1a1;Adipoq;Acta2;Oxtr	Lrp5
GO:0003013	circulatory system process	BP	196	0.11486	0.204483	2.45047e-05	0.458391	Adm;Acta2	Th;Agt;Pomc	Myh6;Smtnl1;Aoc3;Atp1a1;Lep;Oxtr;Acta2;Npr3;Atp2a2;Slc9a1;Csrp3;Adipoq;Myh7	Lrp5;Slc9a1
GO:0050870	positive regulation of T cell activation	BP	73	1	1	0.000920255	0.468393			Icosl;H2-Ab1;Zbtb16;Syk;H2-Aa;Coro1a	Vnn1
GO:0004866	endopeptidase inhibitor activity	MF	64	1	0.29284	0.000198333	0.495135		Agt	Serpine1;Serpina3c;Timp4;App;Itih5;Serpina3n	Serpinb1a
GO:0030414	peptidase inhibitor activity	MF	65	1	0.29746	0.000248152	0.495135		Agt	Serpina3n;Itih5;Serpine1;Serpina3c;Timp4;App	Serpinb1a
GO:0009628	response to abiotic stimulus	BP	429	0.140893	0.0370636	2.13252e-05	0.51798	Ercc2;Trpv2;Hspb7	Th;Tanc1;Cdkn1a;Agt;Hspa1a;Akr1b3;Tsc22d3	Csrp3;Nipbl;Slc9a1;Oxtr;Arpp21;Acot2;Egln3;Ddit4;Hspa1b;Hspb7;Prmt2;Atp1a1;App;Yy1;Fbxo32;Hspa1a;Cat;Trim63;Sod3;Thbs1	Slc9a1;Sik1;Cdkn1a;Notch1
GO:0061135	endopeptidase regulator activity	MF	70	1	0.320112	0.000377029	0.519623		Agt	Serpina3n;Serpine1;Timp4;Serpina3c;Itih5;App	Serpinb1a
GO:0005539	glycosaminoglycan binding	MF	92	0.00288159	0.128955	0.000485633	0.529086	Thbs2;Prelp;Pcolce2	Hapln2;Tnfaip6	App;Cxcl13;Thbs2;Ccdc80;Lpl;Prelp;Thbs1	Nrp2
GO:0071495	cellular response to endogenous stimulus	BP	437	0.145797	0.960928	0.000888662	0.557329	Gpc1;Pdk4;Peg10	Cited1	Sik2;Slc9a1;Lep;Htra3;Ctnna1;Thbs1;Pmepa1;Prmt2;Adipoq;Trim63;Cxcl13;Sorbs1;Smurf2;Coro1a;Pdk4;Rab31;Fbxo32	Slc9a1;Paqr7;Notch1;Lpin1
GO:0042127	regulation of cell proliferation	BP	738	0.410021	0.266084	8.96014e-06	0.62846	Adm;Wisp2;Sfrp5	Ldoc1;Agt;Sfrp5;Lhx5;Cdkn1a;Rbm38;Akr1b3	Zbtb16;Btg1;Dlc1;Icosl;Ntrk2;Ccnd2;Tgif1;Slit3;Lep;Adipoq;Syk;Npr3;Serpine1;Sparc;Ctnna1;Igfbp3;Il6ra;Egln3;Coro1a;Wisp2;Wwtr1;S100a11;H2-Ab1;Ighd;Sfrp5;H2-Aa;Optn;Xirp1;Thbs1	Lrp5;Tsc22d1;Notch1;Cdkn1a;Ighm;Crip2
GO:0005578	proteinaceous extracellular matrix	CC	153	0.0126149	0.017187	0.000696805	0.645023	Prelp;Gpc1;Thbs2	Dmp1;Hapln2;Adamts2;Wnt3	Sparc;Angptl4;Nid1;Adamts5;Prelp;Ccdc80;Smoc1;Lox;Thbs2	Mmrn2
GO:0009897	external side of plasma membrane	CC	127	1	0.166817	0.000605879	0.648663		Glra1;H2-D1	H2-Ab1;Cd79b;Ighd;Thbs1;Mfge8;H2-Aa;Car4;Icosl	Ighm
GO:0015629	actin cytoskeleton	CC	268	0.0423234	0.837562	1.16833e-07	0.650805	Acta2;Palld;Hspb7	Anln	Abra;Myh6;Lcp1;Dlc1;Coro1a;Tpm3;Sptbn1;Tpm4;Acta2;Dstn;Ablim1;Myh7;Utrn;Parva;Myoz2;Sorbs1;Hspb7;Ctnna1;Cdc42ep1	Sh3pxd2a;Sept9
GO:0022414	reproductive process	BP	497	0.186211	0.000999828	0.112934	0.65395	Adm;Sfrp5;Peg10	Glra1;Hmga1;Cldn11;Adamts2;Sfrp5;Cited1;Agt;Wnt3;Cyp26b1;Fzd9;Th	Lep;Hspa1b;Yy1;App;Oxtr;Nipbl;Arntl;Mfge8;Serpine1;Sfrp5;Zfp36l1;Zbtb16	Notch1;Axl;Paqr7;Slc22a5
GO:0044699	single-organism process	BP	6804	0.000758061	0.0326368	4.86069e-05	0.667807	Sema3f;Dock8;Acta2;Trpv2;Peg3;Prelp;Thbs2;Slco3a1;Slc11a1;Palld;Pdk4;Adap2;Hnrnpa3;Wisp2;Ccl6;Sfrp5;Gpc1;Ercc2;Mt2;Alg10b;Arid2;Mt1;Mustn1;Mrc2;Peg10;Sorbs2;Adm;Ehd3;Nedd9	Cited1;Crls1;Th;Carns1;Hapln2;Gjb1;H2-D1;Slc29a4;Glra1;Arhgap24;Rbm38;Cldn11;Lhx5;Cyp26b1;Gjc2;Adamts2;Ret;Pvalb;Wnt3;Spp1;Rhog;Tsc22d3;Vamp1;Avpi1;Kcng4;Akr1b3;Limk1;Klk6;Dmp1;Agt;Rnd1;Cdkn1a;Glrx5;Bst2;Sfrp5;Mrap2;Hdc;Pomc;Ddc;Dio3;Fzd9;Efna1;Tanc1;Olig2;Rassf4;Rab37;Lrig1;Hmga1;Tuba1c;Nt5m;Tnfaip6;Hspa1a;Isg15;Arrdc2;Phlda3;Ldoc1;Tppp3;Anln	Plin1;Ldhb;Kirrel;Wwtr1;Syk;Coro1a;Ppp1r3c;Apcdd1;Npr3;Ablim1;Smoc1;Cd79b;Acta2;Htra3;Zfp36l1;Peg3;Prelp;Serpine1;Slit3;Xirp1;Ctnna1;Ntrk2;Dlc1;Zeb2;Arntl;Angptl4;Rab31;Ankrd2;Thbs2;Bcar3;Map4k4;Lcp1;Tgif1;Sorbs1;Fbln5;Ascc3;Lep;Pdk4;Zbtb16;Dusp18;Ighd;Icosl;Gnai1;Hp;Ndrg1;Prmt2;Sparc;Wisp2;Sik2;App;Eltd1;Fads3;Csrp3;Mbp;Cdc42ep1;Lpl;Lpgat1;Oxtr;Cat;Aoc3;Atp2a2;Atp1a1;Lmod2;Yy1;Igfbp3;Sfrp5;Sptbn…	Rita1;Hk1;Lrp5;Apoa4;Peo1;Crip2;Cdc42ep2;Gadd45g;Agk;Slc12a7;Slc25a25;Sirpa;Megf8;Sbno2;Cyp17a1;Cyp3a44;Mfsd2a;Mafb;Serinc2;Tlr12;Celsr1;Ncmap;Sik1;Nrp2;Arl4d;Fam83h;Abcd4;Pim1;Lpin1;Sytl1;Paqr7;Ckb;Mgll;Cdkn1a;Mmrn2;Xpnpep3;Rsad2;As3mt;Ighm;Clstn3;Slc9a1;Vnn1;Sdr42e1;Plin5;Axl;Jade2;Chrna2;Anks1;Tsku;Notch1;Tsc22d1;Cidec;Sept9;Slc22a5;Slc25a45;Cda;Isg15;Hist1h4i;Slc36a1;Uck1
GO:0010466	negative regulation of peptidase activity	BP	109	1	0.492928	0.000306236	0.672434		Agt	Serpine1;App;Timp4;Itih5;Hspa1b;Serpina3c;Serpina3n;Thbs1	Serpinb1a
GO:0008283	cell proliferation	BP	925	0.062119	0.321602	1.38171e-05	0.709377	Slc11a1;Adm;Sfrp5;Ercc2;Wisp2;Dock8	Akr1b3;Cdkn1a;Sfrp5;Rbm38;Ldoc1;Lhx5;Fzd9;Agt	Btg1;Ctnna1;Sparc;H2-Aa;Thbs1;Igfbp3;Dlc1;Ascc3;Sfrp5;Il6ra;Ntrk2;Npr3;Serpine1;Ighd;Adipoq;Zfp36l1;Egln3;Syk;Icosl;Ddit4;Wwtr1;Zbtb16;Slit3;Lep;Wisp2;Coro1a;Zeb2;Xirp1;Tgif1;Optn;S100a11;Ccnd2;H2-Ab1	Ighm;Pim1;Cdkn1a;Tsc22d1;Notch1;Lrp5;Crip2
GO:0008092	cytoskeletal protein binding	MF	485	0.415556	0.865452	1.83429e-08	0.74971	Hspb7;Palld	Anln;Tppp3	Utrn;Lmod2;Xirp1;Ctnna1;Parva;Sptbn1;Tpm3;Coro1a;Dstn;Csrp3;Lcp1;Myh6;Ndrg1;Tpm4;Hspb7;Hip1r;Trim63;Kirrel;Atp1a1;Tns1;Myh7;Abra;Ablim1;Ankrd2;Dlc1;Myoz2;Rcan3;Sncg	Axl;Sdc3;Rita1
GO:0031012	extracellular matrix	CC	194	0.0262937	0.0436778	8.33477e-07	0.757765	Gpc1;Prelp;Thbs2	Adamts2;Wnt3;Dmp1;Hapln2	Adamts5;Lox;Smoc1;Nid1;Sparc;Prelp;Mfge8;Angptl4;Fbln5;Thbs1;Ccdc80;Sod3;Lpl;Thbs2;Serpine1	Mmrn2
GO:0009719	response to endogenous stimulus	BP	589	0.266006	0.931394	0.000211372	0.784278	Gpc1;Pdk4;Peg10	Cited1;Spp1	Sorbs1;Pmepa1;Coro1a;Thbs1;Sik2;Pdk4;Lep;Serpina3c;Cxcl13;Trim63;Prmt2;Adipoq;Atp2a2;Htra3;Ctnna1;Lox;Oxtr;Fbxo32;Serpina3n;Rab31;Slc9a1;Smurf2	Lpin1;Notch1;Paqr7;Slc9a1
GO:0008285	negative regulation of cell proliferation	BP	340	0.0872646	0.0949241	0.000128538	0.80162	Adm;Wisp2;Sfrp5	Ldoc1;Rbm38;Agt;Cdkn1a;Sfrp5	Igfbp3;Tgif1;Zbtb16;Npr3;Slit3;H2-Ab1;Ctnna1;H2-Aa;Thbs1;Wisp2;Dlc1;Sparc;Adipoq;Btg1;Sfrp5;Xirp1	Notch1;Cdkn1a
GO:0005102	receptor binding	MF	734	0.376144	0.0304197	0.00023526	0.895856	Wisp2;Ccl6;Adm	Hmga1;Wnt3;Agt;Pomc;Hspa1a;Efna1;Spp1;H2-D1;Mrap2;Rnd1	Wisp2;Gnai1;Syk;Il6ra;Serpine1;Hspa1a;Cxcl13;Utrn;Acot2;Icosl;Erbb2ip;Lpl;Adipoq;Sorbs1;Mfge8;App;Slit3;Lep;Thbs1;Atp2a2;Smurf2;Cat;Arntl;Prmt2;Ntrk2	Lpin1;Anks1;Cdc42ep2;Inhbe
GO:0005925	focal adhesion	CC	293	0.0598883	0.0418032	0.000355162	0.941299	Ehd3;Mrc2;Palld	Hmga1;Arhgap24;Limk1;Hspa1a;Rhog	Cat;Lcp1;Myh7;Slc9a1;Tns1;Ppfibp1;Myh6;Dlc1;Hspa1a;Mrc2;Parva;Ctnna1;Cdc42ep1;Akap12	Slc9a1
GO:0005924	cell-substrate adherens junction	CC	298	0.0618097	0.0439578	0.000129281	0.943713	Mrc2;Ehd3;Palld	Rhog;Arhgap24;Hmga1;Hspa1a;Limk1	Lcp1;Myh6;Tns1;Slc9a1;Cat;Mrc2;Sorbs1;Dlc1;Ppfibp1;Cdc42ep1;Hspa1a;Parva;Myh7;Ctnna1;Akap12	Slc9a1
GO:0030055	cell-substrate junction	CC	301	0.0632699	0.045617	4.01512e-05	0.944883	Mrc2;Ehd3;Palld	Arhgap24;Hspa1a;Hmga1;Limk1;Rhog	Tns1;Dlc1;Ctnna1;Sorbs1;Parva;Myh6;Lcp1;Mrc2;Hspa1a;Ppfibp1;Cdc42ep1;Slc9a1;Myh7;Akap12;Cat;Erbb2ip	Slc9a1
GO:0030054	cell junction	CC	705	0.141056	0.00342467	0.000362294	0.946375	Ehd3;Sorbs2;Palld;Mrc2	Hspa1a;Gjb1;Arhgap24;Gjc2;Glra1;Vamp1;Hmga1;Limk1;Cldn11;Akr1b3;Rnd1;Tanc1;Rhog	Kirrel;Hspa1a;Parva;Oxtr;Ctnna1;Sorbs2;Sorbs1;Lcp1;Akap12;Coro1a;Ndrg1;Tns1;Myh6;App;Myh7;Xirp1;Mrc2;Erbb2ip;Slc9a1;Dlc1;Cat;Ppfibp1;Cdc42ep1	Sh3pxd2a;Chrna2;Slc9a1
GO:0005912	adherens junction	CC	332	0.0792938	0.0220508	8.0689e-06	0.961053	Ehd3;Mrc2;Palld	Rnd1;Hspa1a;Rhog;Arhgap24;Limk1;Hmga1	Xirp1;Lcp1;Akap12;Sorbs1;Cat;Dlc1;Ctnna1;Tns1;Mrc2;Ndrg1;Ppfibp1;Oxtr;Hspa1a;Cdc42ep1;Myh7;Parva;Slc9a1;Myh6	Slc9a1
GO:0070161	anchoring junction	CC	339	0.0831408	0.0238682	1.04739e-05	0.963053	Mrc2;Ehd3;Palld	Arhgap24;Rnd1;Hspa1a;Limk1;Rhog;Hmga1	Mrc2;Xirp1;Myh6;Ctnna1;Slc9a1;Parva;Ppfibp1;Dlc1;Cat;Cdc42ep1;Tns1;Oxtr;Lcp1;Hspa1a;Sorbs1;Ndrg1;Akap12;Myh7	Slc9a1
GO:0005856	cytoskeleton	CC	1178	0.124057	0.773993	0.000352796	0.978125	Nedd9;Acta2;Hspb7;Ercc2;Palld;Sorbs2	Tuba1c;Anln;Hspa1a;Arhgap24;Klk6;Tppp3;Rnd1	Tuba1a;Tpm3;Odf3l2;Nedd9;Acta2;Ctnna1;Parva;Tpm4;Tuba1c;Csrp3;Dstn;Ndrg1;Hspb7;Lcp1;Nuak1;Coro1a;Cdc42ep1;Abra;Utrn;Myh7;Gnai1;Dlc1;Hip1r;Sptbn1;Hspa1a;Sncg;Myh6;Sorbs1;Ablim1;Sorbs2;Ntrk2;Myoz2;Akap12;App;Prkar2b	Sept9;Rita1;Cdc42ep2;Sh3pxd2a;Fam110a
GO:0002495	antigen processing and presentation of peptide antigen via MHC class II	BP	17	1	1	7.87286e-05	1			H2-Eb1;H2-Ab1;H2-Aa;H2-Ob
GO:0002504	antigen processing and presentation of peptide or polysaccharide antigen via MHC class II	BP	18	1	1	4.01425e-06	1			H2-Aa;Thbs1;H2-Eb1;H2-Ab1;H2-Ob
GO:0002577	regulation of antigen processing and presentation	BP	11	0.035491	1	0.000275627	1	Slc11a1		Thbs1;H2-Ob;H2-Ab1
GO:0002578	negative regulation of antigen processing and presentation	BP	5	1	1	0.000901064	1			Thbs1;H2-Ob
GO:0002580	regulation of antigen processing and presentation of peptide or polysaccharide antigen via MHC class II	BP	5	1	1	0.000303855	1			Thbs1;H2-Ob
GO:0002581	negative regulation of antigen processing and presentation of peptide or polysaccharide antigen via MHC class II	BP	4	1	1	0.000303855	1			Thbs1;H2-Ob
GO:0003012	muscle system process	BP	149	0.327472	0.289725	0.000539029	1	Acta2	Glra1;Agt	Csrp3;Myh6;Fbxo32;Trim63;Atp1a1;Myh7;Oxtr;Atp2a2;Lep;Acta2
GO:0003779	actin binding	MF	258	0.5288	0.823705	3.36344e-07	1	Palld	Anln	Hip1r;Ablim1;Utrn;Lcp1;Dstn;Lmod2;Myh6;Tpm4;Tpm3;Abra;Coro1a;Xirp1;Myoz2;Parva;Myh7;Ctnna1;Tns1;Sptbn1
GO:0005518	collagen binding	MF	43	0.000226122	1	0.00606086	1	Gpc1;Mrc2;Pcolce2		Nid1;Sparc;Mrc2;Thbs1
GO:0005913	cell-cell adherens junction	CC	40	1	1	0.000318571	1			Ctnna1;Ndrg1;Oxtr;Xirp1;Sorbs1
GO:0006584	catecholamine metabolic process	BP	37	1	6.99701e-05	1	1		Th;Ddc;Akr1b3;Hdc
GO:0006882	cellular zinc ion homeostasis	BP	11	0.000310889	1	1	1	Mt2;Mt1
GO:0007263	nitric oxide mediated signal transduction	BP	11	0.000387882	1	0.176421	1	Mt1;Mt2		Thbs1
GO:0007631	feeding behavior	BP	42	1	0.00938616	0.000284213	1		Th;Agt;Mrap2	Ntrk2;Lep;Oxtr;App;Aoc3
GO:0008065	establishment of blood-nerve barrier	BP	4	1	0.000136624	1	1		Hapln2;Agt
GO:0009712	catechol-containing compound metabolic process	BP	37	1	6.99701e-05	1	1		Ddc;Th;Akr1b3;Hdc
GO:0009713	catechol-containing compound biosynthetic process	BP	13	1	3.51805e-05	1	1		Hdc;Th;Ddc
GO:0010273	detoxification of copper ion	BP	4	2.62012e-05	1	1	1	Mt2;Mt1
GO:0010737	protein kinase A signaling	BP	11	1	1	0.000781269	1			Adipoq;Lcp1;Akap12
GO:0010739	positive regulation of protein kinase A signaling	BP	3	1	1	0.000901064	1			Adipoq;Akap12
GO:0010757	negative regulation of plasminogen activation	BP	5	1	1	0.000901064	1			Thbs1;Serpine1
GO:0014878	response to electrical stimulus involved in regulation of muscle adaptation	BP	4	1	1	0.000901064	1			Fbxo32;Trim63
GO:0015842	synaptic vesicle amine transport	BP	3	1	4.57435e-05	1	1		Th;Ddc
GO:0018958	phenol-containing compound metabolic process	BP	45	1	8.00065e-07	0.411318	1		Cited1;Th;Akr1b3;Dio3;Hdc;Ddc	Zeb2
GO:0019838	growth factor binding	MF	84	0.0278544	1	0.000564425	1	Gpc1;Wisp2		Il6ra;Ntrk2;Igfbp3;Cxcl13;Thbs1;Htra3;Wisp2
GO:0030016	myofibril	CC	120	1	1	4.29713e-05	1			Abra;Csrp3;Fbxo32;Myh6;Smtnl1;Timp4;Myom3;Sptbn1;Ankrd2;Myoz2;Myh7
GO:0030017	sarcomere	CC	102	1	1	9.10386e-06	1			Ankrd2;Myom3;Smtnl1;Csrp3;Timp4;Myh7;Sptbn1;Myoz2;Fbxo32;Abra;Myh6
GO:0030863	cortical cytoskeleton	CC	49	1	1	7.89296e-05	1			Coro1a;Dstn;Tpm4;Utrn;Sptbn1;Tpm3
GO:0030864	cortical actin cytoskeleton	CC	28	1	1	0.000713775	1			Sptbn1;Coro1a;Utrn;Dstn
GO:0031091	platelet alpha granule	CC	12	0.0379308	1	0.000171605	1	Thbs2		Sparc;Thbs1;Thbs2
GO:0031433	telethonin binding	MF	5	1	1	0.000904855	1			Csrp3;Myoz2
GO:0031674	I band	CC	76	1	1	0.000943861	1			Csrp3;Ankrd2;Smtnl1;Myh7;Myh6;Myoz2;Fbxo32
GO:0031779	melanocortin receptor binding	MF	3	1	4.17019e-05	1	1		Mrap2;Pomc
GO:0031781	type 3 melanocortin receptor binding	MF	3	1	4.17019e-05	1	1		Pomc;Mrap2
GO:0031782	type 4 melanocortin receptor binding	MF	3	1	4.17019e-05	1	1		Mrap2;Pomc
GO:0032863	activation of Rac GTPase activity	BP	9	1	0.000939581	1	1		Arhgap24;Rhog
GO:0042423	catecholamine biosynthetic process	BP	13	1	3.51805e-05	1	1		Th;Ddc;Hdc
GO:0042611	MHC protein complex	CC	22	1	0.10854	0.000418715	1		H2-D1	H2-Aa;H2-Ab1;H2-Eb1;H2-Ob
GO:0042613	MHC class II protein complex	CC	10	1	1	5.84537e-06	1			H2-Ob;H2-Ab1;H2-Eb1;H2-Aa
GO:0043292	contractile fiber	CC	130	0.27143	1	2.81854e-06	1	Acta2		Smtnl1;Csrp3;Fbxo32;Ankrd2;Abra;Myom3;Myh6;Myh7;Myoz2;Timp4;Trim63;Sptbn1;Acta2
GO:0044448	cell cortex part	CC	75	1	0.39017	0.000969277	1		Anln	Tpm4;Sptbn1;Tpm3;Coro1a;Dstn;Utrn
GO:0044449	contractile fiber part	CC	114	0.24245	1	3.47794e-06	1	Acta2		Fbxo32;Myh6;Ankrd2;Myoz2;Csrp3;Myh7;Acta2;Sptbn1;Myom3;Abra;Timp4;Smtnl1
GO:0046189	phenol-containing compound biosynthetic process	BP	15	1	1.88819e-06	0.146824	1		Cited1;Hdc;Th;Ddc	Zeb2
GO:0046688	response to copper ion	BP	11	0.000473188	1	0.131631	1	Mt2;Mt1		Sod3
GO:0046916	cellular transition metal ion homeostasis	BP	41	0.000243217	1	0.470615	1	Mt2;Mt1;Slc11a1		App
GO:0050839	cell adhesion molecule binding	MF	102	1	1	0.000986833	1			Thbs1;Erbb2ip;Ctnna1;Ndrg1;Utrn;Mfge8;Syk
GO:0051917	regulation of fibrinolysis	BP	7	1	1	0.000901064	1			Thbs1;Serpine1
GO:0051918	negative regulation of fibrinolysis	BP	6	1	1	0.000901064	1			Serpine1;Thbs1
GO:0051969	regulation of transmission of nerve impulse	BP	4	1	0.000674105	1	1		Glra1;Agt
GO:0055069	zinc ion homeostasis	BP	11	0.000310889	1	1	1	Mt1;Mt2
GO:0055076	transition metal ion homeostasis	BP	66	0.000949004	1	0.641524	1	Mt2;Slc11a1;Mt1		App
GO:0070252	actin-mediated cell contraction	BP	24	1	1	0.000998157	1			Atp1a1;Parva;Myh6;Myh7
GO:0070996	type 1 melanocortin receptor binding	MF	3	1	4.17019e-05	1	1		Mrap2;Pomc
GO:0090183	regulation of kidney development	BP	28	1	0.000704728	0.0751166	1		Cited1;Ret;Agt	Wwtr1;Adipoq
GO:0097501	stress response to metal ion	BP	5	5.23039e-05	1	1	1	Mt1;Mt2
GO:1901617	organic hydroxy compound biosynthetic process	BP	100	1	0.000668093	0.208265	1		Cited1;Th;Ddc;Akr1b3;Hdc	Ldhb;Zeb2;Lep
GO:1990169	stress response to copper ion	BP	4	2.62012e-05	1	1	1	Mt2;Mt1
