# Supplementary material for: Common and unique transcriptional responses to dietary restriction and loss of insulin receptor substrate 1 (IRS1) in mice
Source: Aging (Albany NY). 2018 May 20;10(5):1027–52. doi: 10.18632/aging.101446 (PMC5990393; doi:10.18632/aging.101446)
Supplement: Supplementary Table S7 [file aging-10-101446-s008.xlsx]

## Sheet: KO_AL_vs_WT_DR Liver
gene	locus	WT_DR Liver FPKM	KO_AL Liver FPKM	log2(fold_change)	test_stat	p_value	q_value
Gm28041,Gm28044,Zfp456,Zfp595,Zfp953	13:67312997-67375810	2.68828	2.68814	-7.75894e-05	0.000102673	0.99985	0.999933
Zfp1	8:111643442-111671008	5.12294	5.12279	-4.45118e-05	8.27636e-05	0.9946	0.998861
Gm25381	15:39198331-39681940	99.079	5.92634	-4.06337	4.26662	0.2538	0.789861
Ddx5	11:106780354-106789185	644.443	55.4346	-3.5392	0.712443	0.0027	0.10977
Gm14541	X:36823736-36874111	127.955	11.8118	-3.43734	1.91904	0.22745	0.770876
Thrsp	7:97412937-97417730	189.321	18.2598	-3.37409	4.37341	5e-05	0.00661738
Gm11204	11:79905980-79906127	51.3223	5.19192	-3.30524	3.68721	0.0218	0.335966
Snhg7,Snora17,Snora43	2:26637176-26640244	24.7533	2.60414	-3.24874	4.54854	5e-05	0.00661738
Dbp	7:45705087-45720835	147.165	15.6889	-3.22962	1.88947	0.02665	0.369337
Gm19774	18:38601533-39389425	73.9089	8.10779	-3.18837	0.427235	0.31165	0.826937
Gm27875,Jpx	X:103493557-103506425	34.9275	4.16471	-3.06807	1.33283	0.0838	0.579348
Gm14536	X:13189537-13189675	38.0158	5.19131	-2.87243	3.14963	0.0362	0.421778
Gm14039	2:129362758-129362859	86.4308	12.0291	-2.84502	17.8829	0.24385	0.782901
Per3	4:150914561-151861876	9.24483	1.39982	-2.72341	2.95778	0.00015	0.0157786
Sult2a7	7:14465158-14492926	25.1416	3.80772	-2.72307	4.55263	5e-05	0.00661738
Mrm1	11:84813060-84819515	9.78309	1.52984	-2.67691	1.23026	0.0216	0.334766
Gm11966	11:5818496-5818583	150.255	24.0533	-2.6431	20.4065	0.0388	0.433232
Gm22750	13:8921335-8921438	84.9533	13.871	-2.6146	3.16166	0.0255	0.362001
Fabp5	3:10012547-10016607	7.60546	1.26106	-2.5924	3.00087	5e-05	0.00661738
A330023F24Rik,Mir29b-2,Mir29c	1:194938818-195038908	19.6588	3.42818	-2.51966	2.74327	0.00065	0.0454075
Upp2	2:58567297-58792971	154.884	28.6346	-2.43536	3.12097	5e-05	0.00661738
Ciart	3:95871521-95892005	5.7949	1.08075	-2.42275	1.93739	0.00165	0.0821783
Gm22137,Gm7541	16:8623162-8623720	5.97911	1.13292	-2.39989	1.72392	0.1292	0.661061
Gm11572	11:97116795-97116915	43.8618	8.498	-2.36777	2.33687	0.16095	0.704591
Gm5822	19:28835048-28967800	122.642	23.8091	-2.36487	4.00303	5e-05	0.00661738
Fdps	3:89093591-89101967	61.1394	11.9199	-2.35874	3.11131	5e-05	0.00661738
C1qtnf6	15:78523345-78529625	6.20774	1.26277	-2.29747	2.81203	0.023	0.344571
Gm15151	X:151758016-151758193	78.4369	15.99	-2.29436	1.62085	0.0327	0.403449
Gm16238	3:127670398-127780527	9.68299	1.98162	-2.28877	1.77766	0.01505	0.280422
Tcf24	1:9960162-10009136	6.53977	1.37565	-2.24913	3.29306	5e-05	0.00661738
Mir6240	5:114851947-114852064	50.1201	10.6965	-2.22826	15.1631	0.0663	0.532749
Gm6166	9:57483912-57484585	21.4393	4.64309	-2.2071	3.58221	5e-05	0.00661738
Gm22579	9:15316675-15316808	27.2452	5.91896	-2.20258	8.57655	0.2237	0.767745
Cyp2j9	4:96568428-96591578	17.5765	3.84018	-2.1944	3.86936	5e-05	0.00661738
Gm4761	6:67414430-67415012	4.57927	1.00171	-2.19265	1.8546	0.0092	0.218378
Gm11410	4:80003988-80005131	21.9228	4.8439	-2.17819	3.38231	5e-05	0.00661738
Gm16053	7:97400002-97407802	7.6939	1.70406	-2.17474	0.385599	0.3972	0.873809
Rbp1	9:98422960-98446575	13.1161	2.91213	-2.17119	3.87803	5e-05	0.00661738
Gm13685	2:83538534-83538675	14.9212	3.34981	-2.15521	5.07364	0.214	0.759153
Rpl36-ps10	X:19870823-19871039	13.4075	3.02552	-2.14779	2.15079	0.11665	0.641764
Gm15027	X:13179442-13179580	45.2158	10.3082	-2.13304	1.14371	0.0878	0.587906
Scd1	19:44394450-44407709	748.882	172.033	-2.12206	3.0156	5e-05	0.00661738
Pcsk9	4:106442328-106464329	17.9331	4.16609	-2.10586	2.84653	5e-05	0.00661738
RP24-372I24.3	3:65968901-65969151	19.6355	4.59235	-2.09616	2.4817	0.0363	0.422283
Gm11488	4:73497614-73498477	14.0486	3.30397	-2.08815	3.13337	5e-05	0.00661738
Serpina6	12:103646629-103657212	625.539	148.597	-2.0737	3.49989	5e-05	0.00661738
Gm5265	1:169453527-169453869	5.54975	1.33284	-2.05792	1.34049	0.058	0.507063
Nsdhl	X:72918556-72958514	29.1154	7.13274	-2.02926	3.192	5e-05	0.00661738
Gm16415	18:42441018-42441507	6.13518	1.51835	-2.0146	1.75527	0.01625	0.291333
Gm20091	10:96408849-96409038	20.0408	5.06802	-1.98345	1.98277	0.13355	0.667501
Hipk3	2:104426480-104494446	44.2835	11.2312	-1.97926	4.47161	5e-05	0.00661738
Gm15452	1:8361474-9299878	91.1442	23.2213	-1.9727	1.74678	0.0106	0.234899
Cyp2b10	7:25897619-25926624	22.787	5.89173	-1.95145	2.22342	0.00035	0.0292274
Cyp2g1	7:26808926-26821197	5.50541	1.42432	-1.95058	2.75257	5e-05	0.00661738
Gm3571	10:93778610-93779772	121.448	31.568	-1.9438	2.56221	5e-05	0.00661738
Gm4899	8:81197626-81198214	4.5303	1.20772	-1.90732	1.6619	0.02075	0.328868
WI1-298L18.1	3:52425407-52425648	12.3242	3.31709	-1.89351	1.98801	0.05275	0.489772
Gm12891	4:122925832-122926072	6.72994	1.81293	-1.89227	1.52031	0.0576	0.505856
Msmo1	8:64718138-64733792	229.599	62.5876	-1.87517	1.66755	0.00085	0.0538205
1700066M21Rik	1:57377619-57385423	23.4374	6.60737	-1.82667	1.82297	0.0015	0.0773753
Gm8019	X:137099515-137100102	4.50039	1.28972	-1.80299	1.59442	0.02035	0.325994
Nupl1	14:60219203-60251507	16.7231	4.79585	-1.80199	2.69195	0.00275	0.111088
Tdp2	13:24831678-24842153	9.79884	2.84044	-1.7865	4.44072	5e-05	0.00661738
Gm12504	4:44121892-44124123	10.1352	2.96945	-1.77111	1.38331	0.03415	0.411597
Rnf19a	15:36239933-36283147	42.6712	12.5036	-1.77092	0.345674	0.119	0.645648
Idi1	13:8885500-8892451	21.4544	6.35204	-1.75598	2.69913	5e-05	0.00661738
RP23-243J5.2	1:177983422-178172704	5.83029	1.75377	-1.73311	1.21338	0.3163	0.829981
Abca8a	11:110025633-110095978	18.0984	5.51017	-1.71569	0.806935	0.04805	0.473176
Gm6091	8:126476247-126476412	121.558	37.2601	-1.70594	1.52623	0.02305	0.344849
Marcksl1-ps4	13:4248734-4249025	15.1797	4.6932	-1.6935	1.62978	0.01125	0.241993
Gm4997	X:155150951-155151311	51.0268	15.8484	-1.68691	2.33633	0.00045	0.0349616
Gm15796	5:38507462-38507666	20.8093	6.46799	-1.68584	0.945282	0.13535	0.670462
Gm11838	4:14623619-14796060	33.1229	10.3346	-1.68035	1.40773	0.02945	0.386035
Ddx26b	X:56454856-56507843	3.26876	1.02572	-1.67211	1.49291	0.01195	0.249897
RP24-341I21.6	3:92937680-92938072	12.9189	4.05652	-1.67117	1.68427	0.0077	0.198899
Gm27684	7:115172272-115172352	306.057	97.546	-1.64964	0.915815	0.1525	0.694741
Tada2a	11:84078919-84129600	5.4418	1.74292	-1.64258	0.910682	0.06075	0.516434
Gm7123	X:142412754-142412967	9.02701	2.9037	-1.63635	1.48432	0.17055	0.715374
9130409I23Rik	1:181051236-181060667	3.93796	1.26801	-1.63488	2.37728	0.00025	0.023074
Gm15032	X:142622491-142622902	3.67346	1.18429	-1.63312	1.12396	0.0832	0.577622
Gm22752,Gm5278	3:93306467-93465359	1732.55	559.227	-1.63139	1.81046	0.00795	0.202273
Cyp51	5:4081144-4104746	39.2988	12.698	-1.62989	2.45373	0.0004	0.0322049
6720427I07Rik	13:48535522-48537822	4.46098	1.45219	-1.61913	1.23205	0.0064	0.179651
Gm24539	13:62129915-62173419	19.0737	6.21305	-1.61821	6.13144	0.2723	0.801515
Gm16265	X:12654878-12673668	34.6549	11.2935	-1.61756	4.49595	0.5355	0.925527
Hamp	7:30942370-30944017	11090.4	3657.74	-1.60028	1.85822	0.00105	0.0617525
Ndufaf6	4:11051044-11076205	33.6883	11.1728	-1.59226	0.957527	0.0766	0.562181
Gadd45a	6:67035095-67080654	8.57143	2.85827	-1.5844	2.03818	0.0007	0.0476587
Rpl31-ps17	12:54701328-54701706	19.0796	6.39658	-1.57665	1.81457	0.0069	0.187459
Aacs	5:125475813-125517412	9.09763	3.05688	-1.57343	1.77239	0.00055	0.0403981
Impg2	16:56204312-56273756	5.45703	1.83584	-1.57168	0.67288	0.23525	0.776708
Gm11759	2:145167753-145642166	7.9735	2.69129	-1.56691	1.41095	0.07065	0.545656
Gm11889	4:23517361-23518440	18.8531	6.36419	-1.56675	2.69566	5e-05	0.00661738
Gm5528	1:71958997-72038731	3.37184	1.14038	-1.56402	1.24462	0.05465	0.496056
Gm14328	18:74283089-74359986	9.60194	3.25041	-1.5627	1.56809	0.01055	0.234376
Rpl31-ps4	16:87549061-87549451	32.7501	11.1083	-1.55986	2.14792	0.001	0.0599471
Gm10804	2:93419110-93469871	3.51608	1.20672	-1.54288	0.454408	0.2538	0.789861
3110052M02Rik	17:21657581-21662540	3.72782	1.27974	-1.54248	2.25721	0.0074	0.194644
2810008D09Rik	11:117076789-117078955	16.4287	5.64413	-1.54139	1.39995	0.0174	0.301929
Rpl32-ps	3:69716939-69717445	5.6273	1.93648	-1.53901	1.35899	0.03165	0.397763
Hook2	8:84990594-85003364	9.19635	3.17427	-1.53464	3.23416	5e-05	0.00661738
Cbwd1	19:24919915-24961616	3.83475	1.32667	-1.53132	2.14865	0.0018	0.0867171
1110038B12Rik,Gm25744,Snord52	17:34950237-34952471	33.7138	11.697	-1.52719	2.0408	0.0001	0.0114993
Usp2	9:44066326-44121947	18.9557	6.58881	-1.52454	1.19906	0.05535	0.4985
Gm6293	19:5406739-5424979	63.9272	22.2652	-1.52164	0.414065	0.4756	0.906209
Rps27-ps1	1:62958417-63180486	3.15562	1.10057	-1.51967	0.113101	0.483	0.908732
Gm6954	X:80666312-80666537	4.0719	1.42706	-1.51265	0.957451	0.3006	0.819453
Gm17511	7:127286040-127286385	100.705	35.3082	-1.51206	2.49805	5e-05	0.00661738
Ighv1-53	12:115158402-115158835	6.46685	2.26814	-1.51155	1.42081	0.0916	0.595117
Insig1	5:28071362-28078662	56.7315	19.9377	-1.50865	3.73347	5e-05	0.00661738
Gm15236	X:165680203-165680582	4.72104	1.66232	-1.50591	1.19071	0.0544	0.495537
Gm5873	6:6735426-6736492	36.6775	12.9285	-1.50434	1.99374	0.00065	0.0454075
Gm2830	13:54499704-54500089	5.8737	2.07087	-1.50403	1.27157	0.0437	0.455136
Gm16305	1:138963708-139176043	2.95073	1.04956	-1.49129	0.559081	0.5876	0.939708
Ppp4r4	12:103532282-103613831	3.20002	1.13864	-1.49077	1.10907	0.0099	0.226469
Gm12229	11:54717455-54787675	3.06101	1.0893	-1.4906	0.48598	0.58545	0.939268
Gm8163	X:60223289-60807993	4.50592	1.60571	-1.48861	0.38486	0.55425	0.93106
Nrep	18:33437018-33464029	7.38572	2.64075	-1.48379	2.75947	0.00015	0.0157786
Gm11512	11:90476491-90638084	8.60529	3.08204	-1.48134	0.966872	0.12005	0.647303
Gm10639	9:78289922-78305525	8.39501	3.01047	-1.47954	1.66839	0.007	0.188704
RP23-396I19.1	3:69963281-69963470	90.7027	32.5303	-1.47936	2.27273	0.03155	0.39727
9930021J03Rik	19:29714401-29805989	4.81789	1.73135	-1.4765	2.39195	5e-05	0.00661738
Gm14325	2:177831790-177840336	3.00958	1.08157	-1.47644	0.895872	0.09605	0.603791
RP23-206D14.7	2:127269448-127270054	2.8785	1.03465	-1.47618	0.97091	0.3591	0.854237
Atp6v0d2	4:19876840-19922605	9.87021	3.558	-1.47201	1.08085	0.0492	0.477361
Hmgcr	13:96648966-96670936	26.7097	9.63243	-1.47139	1.18433	0.00085	0.0538205
Gm14046	2:129749900-129750409	15.4263	5.58634	-1.46541	1.93122	0.0053	0.162013
Gm24095	13:62543202-62543335	14.8029	5.36823	-1.46336	4.58993	0.44905	0.896803
Gm28049	14:69337173-69523605	2.87472	1.04499	-1.45994	0.388596	0.42315	0.885949
Gm18343	5:25271797-25498783	2.7797	1.01116	-1.45892	0.469197	0.64795	0.954206
Rpl19-ps4	14:13777813-13778440	686.838	249.99	-1.4581	0.277267	0.3741	0.862312
D730045B01Rik	5:151367719-151428210	4.69261	1.71628	-1.4511	0.753931	0.1666	0.71114
Osgin1	8:119434123-119446256	148.076	54.316	-1.44689	4.78715	0.0001	0.0114993
Gm11694	11:115493023-115493182	52.4438	19.28	-1.44367	1.00002	0.102	0.6155
Pmvk	3:89459117-89469013	48.0714	17.7228	-1.43957	2.31047	0.0002	0.0195433
Rps27l	9:66946085-66949516	195.091	72.2519	-1.43304	2.67199	5e-05	0.00661738
Gm16570	12:81573556-81595008	8.26624	3.0685	-1.4297	0.769631	0.27375	0.802695
Mdn1	4:32657118-32775217	7.66487	2.854	-1.42528	1.01533	0.12355	0.652413
Gm11832	4:11558921-11615805	5.63741	2.09946	-1.42501	1.04931	0.25485	0.790613
Gm14420	2:177464732-177478129	3.86355	1.44237	-1.42149	1.49694	0.01665	0.295167
Tusc3	8:39005866-39165112	3.04218	1.13747	-1.41927	1.66381	0.0065	0.181324
Igkv5-43	6:69823354-69823911	3.07518	1.15296	-1.41533	0.929317	0.1559	0.698398
Fam25c	14:34351880-34355433	146.327	54.875	-1.41498	2.69113	5e-05	0.00661738
Cenpa	5:30666776-30674827	4.70566	1.77597	-1.40579	1.62784	0.0054	0.163634
Olfr20,Spata22	11:73329740-73355913	3.44642	1.30205	-1.40431	1.73155	0.00945	0.221227
Arhgap6	X:168795098-169320372	2.7014	1.02111	-1.40356	1.24208	0.016	0.288964
Gm20257	1:58646687-58695989	11.6473	4.40701	-1.40213	2.09538	0.21015	0.755958
RP23-99I7.2	3:86224679-86782692	8.83211	3.34629	-1.4002	0.466602	0.48955	0.911147
Coq10b	1:55051318-55072702	15.9566	6.05832	-1.39716	2.2302	0.0005	0.0377141
Bbs2	8:94067953-94098811	4.95712	1.89051	-1.39072	1.27842	0.05785	0.506512
Sqle	15:59315076-59331192	14.8774	5.68527	-1.38782	1.81945	0.00375	0.133511
Gm4673	7:30945251-30973464	5.28461	2.01962	-1.38771	0.721827	0.4747	0.905964
4921513D11Rik	17:79614899-79682152	2.99684	1.14938	-1.38258	0.590962	0.48075	0.907798
H60b,Raet1d,Raet1e	10:22158568-22374139	59.0539	22.6544	-1.38224	1.06836	0.10465	0.620411
Gm15067	X:144268048-144268204	97.2194	37.349	-1.38017	1.21056	0.0581	0.507496
Gstm3	3:107963695-107969283	30.6515	11.7757	-1.38014	2.36877	5e-05	0.00661738
GBP11,Gbp11	5:105323041-105346472	3.57702	1.3767	-1.37754	2.14342	0.0016	0.0806254
Depdc7	2:104721783-104742878	15.6366	6.02032	-1.37702	2.61008	5e-05	0.00661738
Evc	5:37242079-37336894	2.8401	1.09545	-1.37442	1.44858	0.0035	0.128299
Gm4986	X:39870499-40475561	4.0048	1.5483	-1.37105	1.04231	0.07225	0.549798
Gm14794	X:88749451-88749643	39.8224	15.4064	-1.37005	1.21283	0.05935	0.51151
Arl5b	2:14995130-15082456	16.6509	6.4584	-1.36635	1.51324	0.01225	0.253032
Lor	3:92080270-92083142	3.02842	1.17471	-1.36626	1.6649	0.01455	0.27599
Hnrnph1	11:50376989-50386528	80.0789	31.1412	-1.3626	0.571918	0.1245	0.653918
Gm27529	15:7873054-8099209	250.615	97.6508	-1.35977	0.665367	0.5061	0.916155
Srebf1	11:60105012-60222581	155.59	60.6693	-1.35871	1.09277	0.0206	0.327745
Etnppl	3:130617447-130635750	72.0263	28.1622	-1.35476	1.98105	0.0004	0.0322049
Utp14a	X:48256861-48285426	11.3239	4.42798	-1.35465	2.87873	0.0001	0.0114993
Cenpm	15:82233778-82244747	3.57717	1.40157	-1.35178	1.51555	0.01805	0.307847
2310001H17Rik	6:129208411-129237982	16.3252	6.41644	-1.34725	1.79059	0.0056	0.167206
Ddit3	10:127289695-127311786	20.6143	8.12533	-1.34315	0.908832	0.13985	0.676692
B4galt5	2:167298443-167349183	7.48029	2.95606	-1.33942	2.34994	5e-05	0.00661738
Ugcg	4:59189256-59222833	6.35454	2.53071	-1.32825	2.4283	0.00075	0.0498428
Gm17196	10:41538845-41709300	2.7339	1.08995	-1.32669	0.504479	0.512	0.918348
Gga3	11:115584254-115612969	8.42239	3.38501	-1.31507	0.18149	0.311	0.826576
Spc25	2:69193894-69206194	11.145	4.48467	-1.31332	1.7453	0.00265	0.108926
Eif4a1	11:69666935-69672423	240.477	96.8008	-1.31281	0.696144	0.0472	0.46977
Tceal8	X:136168983-136172342	11.4655	4.63705	-1.30602	2.03057	0.00035	0.0292274
Hook3	8:26021420-26119224	4.04781	1.64371	-1.30018	1.17706	0.00165	0.0821783
Gm8258	5:104775778-104777227	4.51427	1.83744	-1.2968	2.11352	0.00185	0.088338
Gm6028	1:111880734-111881308	8.21714	3.36981	-1.28597	1.55495	0.01255	0.256205
Itgav	2:83724396-83806916	4.39729	1.80504	-1.28458	0.795729	0.06785	0.537177
Mid1ip1	X:10707175-10719690	32.8287	13.4773	-1.28443	1.73735	0.0036	0.130527
Gm21811	8:20136501-20151665	4.64714	1.90818	-1.28415	1.72097	0.01015	0.229331
Sc5d	9:42254176-42264300	148.885	61.1511	-1.28375	2.2131	0.00035	0.0292274
Gm6947	1:71493736-71493814	49.437	20.3147	-1.28307	11.2921	0.5314	0.924387
Pogz	3:94837566-94882326	14.2989	5.88231	-1.28145	0.605131	0.25425	0.790225
1110020A21Rik	17:84954966-85023991	3.10837	1.28498	-1.27441	0.299609	0.5641	0.933876
Coq10a	10:128363096-128370032	14.8838	6.16093	-1.27252	2.6622	5e-05	0.00661738
Ccdc84	9:44407713-44418003	6.86327	2.85236	-1.26674	0.556245	0.3806	0.865776
Zfp354a	11:51059256-51072799	6.54976	2.72386	-1.26579	1.25119	0.01735	0.30151
Pus7	5:23740647-23783711	3.87106	1.61049	-1.26523	1.8375	0.00065	0.0454075
Anks3	16:4941414-4964237	4.17758	1.74357	-1.26063	1.97259	0.0009	0.0559783
Gm7114	1:33100906-33102695	5.46062	2.2807	-1.25959	2.15742	0.0007	0.0476587
Rpl12-ps1	1:36957929-36958427	5.51196	2.30397	-1.25845	1.22285	0.04085	0.443176
Supt20	3:54692822-54735393	7.10573	2.97084	-1.25811	1.75001	0.00465	0.150946
Aqp8	7:123462293-123468003	55.1654	23.1446	-1.25308	1.99169	0.0017	0.083784
Mug-ps1	6:122176014-122248563	68.3563	28.7042	-1.25181	1.58213	0.00265	0.108926
Gmcl1	6:86691767-86733378	3.7247	1.56769	-1.24849	2.05292	0.00055	0.0403981
Gm6564	5:22931389-22932034	5.08775	2.14249	-1.24774	1.1406	0.0345	0.413263
Gm6750	12:116485719-117337022	17.4682	7.36019	-1.24691	0.977659	0.11295	0.635432
Gm5621	9:105560117-105560762	94.2036	39.7525	-1.24474	2.27964	0.00015	0.0157786
Syne2	12:75818133-76110926	15.1757	6.41018	-1.24332	1.23781	0.0193	0.317471
Eva1a	6:82041042-82093099	126.41	53.4117	-1.24289	2.41452	0.00025	0.023074
Vta1	10:14654754-14705560	19.7044	8.32732	-1.24259	1.27212	0.0292	0.384679
Gm13604	2:67565870-68122689	5.08122	2.15039	-1.24057	0.414751	0.3651	0.857692
Eps8l1	7:4445696-4479404	9.4079	3.98549	-1.23912	1.10011	0.08135	0.573506
Gm26384	17:21284102-21284212	114.248	48.4291	-1.23822	1.35479	0.28265	0.807985
Aox3	1:58113129-58200698	45.9866	19.5276	-1.2357	1.50904	0.00015	0.0157786
Gm12499	3:108029599-108031361	2.95554	1.25547	-1.23519	1.03169	0.08945	0.590844
Rsl1d1	16:11192969-11203331	43.2621	18.411	-1.23254	2.78039	5e-05	0.00661738
Smad9	3:54755581-54801257	4.50585	1.92603	-1.22617	2.0555	0.00025	0.023074
Cbx3	6:51470359-51483704	8.86075	3.79515	-1.22327	2.13753	0.00045	0.0349616
Mug2	6:122006797-122085967	77.4841	33.1974	-1.22283	2.12336	0.00085	0.0538205
Gm8722	X:77757377-77758146	19.4937	8.37649	-1.21859	2.18464	0.00135	0.0724871
Gm12587	11:121886541-121886968	2.65755	1.14533	-1.21433	0.807014	0.16725	0.71173
Ngef	1:87476833-87597845	13.4508	5.79802	-1.21406	2.01346	0.00055	0.0403981
BC021614	19:4057476-4059446	31.0499	13.4042	-1.2119	2.00389	0.0005	0.0377141
Gm11974,Gm22457	11:6525590-6528760	6.98723	3.01805	-1.21111	1.43895	0.03935	0.436003
Gm5263	1:146419435-146902472	2.69657	1.16551	-1.21017	0.857801	0.17775	0.723342
Rpl31-ps18	19:51792225-51792602	10.0959	4.36598	-1.20939	1.28583	0.04665	0.467316
Rpl21-ps7	17:83288545-83289028	3.78796	1.63816	-1.20934	1.03064	0.1015	0.614642
Gm12852	4:98936664-99120915	9.17836	3.96995	-1.20911	0.119829	0.3812	0.866052
Acss2	2:155490378-155594955	50.0347	21.6707	-1.20719	1.10793	0.0586	0.509072
2610005L07Rik	8:20262612-20424814	2.71872	1.17763	-1.20705	0.664584	0.24725	0.785393
Rev1	1:37998009-38129801	7.88954	3.41952	-1.20615	0.530014	0.10555	0.622311
Rpl31-ps7	6:47785995-47786374	3.46583	1.50502	-1.20342	1.05002	0.1482	0.688645
Gm10784	13:49945095-49945335	18.6237	8.09299	-1.20239	1.03233	0.09535	0.602286
Gm15566	9:120303935-120474841	3.36717	1.4655	-1.20015	1.04169	0.0678	0.536964
Gm11686	2:143881176-143881509	3.70396	1.6122	-1.20004	0.783681	0.18745	0.733248
S100a11	3:93520487-93526287	10.0411	4.37713	-1.19786	1.46668	0.01715	0.299768
Ppargc1b	18:61298135-61400431	2.48506	1.08627	-1.19389	1.08116	0.0091	0.217125
Slc17a8	10:89574019-89621253	5.54547	2.42529	-1.19315	2.8106	0.0001	0.0114993
Arhgap17	7:123279149-123369915	3.50308	1.53421	-1.19112	2.07301	0.00075	0.0498428
Pcgf6	19:47033618-47050845	4.99844	2.19213	-1.18914	1.97236	0.0012	0.0670609
Gm7363	7:3983786-3984187	14.7261	6.45924	-1.18894	1.4396	0.0166	0.294659
RP23-299B23.1	3:7192777-7193210	2.97777	1.30755	-1.18737	0.937976	0.1109	0.632105
Gm2735	9:59750895-59928866	5.30071	2.33446	-1.1831	0.486165	0.54555	0.928583
Gm13142	4:146153455-147492201	15.6305	6.89566	-1.18061	1.22862	0.0652	0.529446
Shroom3	5:92683434-92965318	3.32464	1.46782	-1.17952	1.04574	0.05715	0.504304
Gm13306	4:42153435-42158839	3.54459	1.56636	-1.17821	0.903938	0.08395	0.57974
Smyd2	1:189879934-189922363	29.2221	12.9454	-1.17462	1.84763	0.0027	0.10977
RP24-188H2.6	1:160978584-161038539	4.21488	1.86742	-1.17445	0.03804	0.5546	0.931132
Gsta1	9:78230655-78242684	7.73811	3.43045	-1.17358	1.56691	0.00815	0.204927
Eid1	2:125627446-125724148	9.45543	4.19625	-1.17204	2.28095	0.00035	0.0292274
Fam132a	4:155962317-155966629	3.89442	1.73245	-1.1686	0.992721	0.14415	0.683113
Fdft1	14:63122461-63177793	36.2917	16.1518	-1.16795	0.559625	0.65235	0.955166
Sult2a6	7:14222402-14254870	62.6781	27.9275	-1.16627	2.24531	0.0001	0.0114993
Gls2	10:128194456-128211794	321.351	143.711	-1.16098	1.87934	0.00085	0.0538205
Fam151b	13:92449621-92484031	5.15826	2.30702	-1.16085	1.74783	0.00495	0.156327
Cyp2c70	19:40153352-40187333	174.148	77.8961	-1.16069	2.10085	0.00095	0.0579755
Ccnd1	7:144915099-144939869	63.8375	28.5596	-1.16043	1.52529	0.00215	0.0963547
Tmem237	1:59100589-59237231	3.46684	1.55159	-1.15987	0.308876	0.26155	0.794184
Trim12c	7:104244456-104353362	8.02419	3.59506	-1.15834	1.47011	0.0344	0.412781
Abcc2	19:43782191-43840740	175.677	78.7312	-1.15792	1.15308	0.0324	0.40177
Gm8973	15:99006055-99006370	4.37307	1.95985	-1.1579	1.01797	0.18385	0.729689
Fcor	8:3671187-3672336	3.79101	1.70084	-1.15634	0.920975	0.12035	0.647646
F830016B08Rik	18:60293379-60303016	11.9569	5.37615	-1.1532	2.15692	0.00095	0.0579755
Gm11450	2:162805589-162805922	3.54568	1.59692	-1.15077	0.758516	0.22835	0.771596
Mvd	8:119910359-124345724	9.97948	4.4949	-1.15068	0.0922507	0.5121	0.918348
Arfgef1	1:10137570-10232670	16.8903	7.61543	-1.1492	1.09584	0.0415	0.446253
Sec61b	4:47474657-47483242	88.0551	39.7054	-1.14907	2.11074	0.00025	0.023074
Lamtor3	3:137918525-137928765	14.8343	6.69885	-1.14695	2.05721	0.00105	0.0617525
A1bg	15:60917588-60921270	900.364	406.94	-1.14569	1.67835	0.0024	0.102681
Gm24400	19:43847966-43912392	14.4372	6.52807	-1.14506	1.42317	0.6075	0.94445
Snora24	3:123507936-123508066	25.685	11.6452	-1.14119	0.952036	0.1821	0.727758
Slc44a3	3:121459528-121535438	2.43188	1.10338	-1.14015	1.14037	0.04695	0.468659
9330151L19Rik	12:69189086-69199868	4.59701	2.08608	-1.1399	1.1733	0.0979	0.607439
Akap8l	17:32321424-32350581	13.6161	6.18274	-1.139	2.26814	0.00035	0.0292274
Hrsp12	15:34484020-34495255	567.452	257.87	-1.13786	2.13928	0.00055	0.0403981
Mnd1-ps	14:9550091-11162035	5.62628	2.56241	-1.13468	0.821648	0.1164	0.641203
1700040L02Rik	10:68430952-68541896	2.36307	1.07666	-1.1341	1.07307	0.0552	0.498137
Cyp7a1	4:6265611-6275633	47.7179	21.7419	-1.13405	1.3038	0.0065	0.181324
Taf15	11:83473085-83506743	20.8006	9.47972	-1.13371	2.2115	0.00015	0.0157786
Lpl	8:68880490-68907448	8.52354	3.90755	-1.12519	1.72776	0.0031	0.119489
Lum	10:97565500-97572703	2.80464	1.28607	-1.12485	8.92282	0.00295	0.115975
Luc7l2	6:38551333-38609470	41.4605	19.0323	-1.12329	1.45964	0.0071	0.190148
Yes1	5:32458973-32687066	3.08164	1.41562	-1.12227	0.976414	0.10185	0.615302
Sqrdl	2:122765236-122809569	243.784	112.211	-1.11938	1.64369	0.00645	0.180429
Rpl38-ps1	4:138425787-138426002	122.991	56.683	-1.11757	1.58618	0.00705	0.189449
Gm12990	4:135403188-135403656	5.90912	2.72744	-1.1154	1.10427	0.0665	0.533286
Prss8	7:127912516-127930113	5.77936	2.66933	-1.11443	1.10352	0.1477	0.687935
Inmt	6:55170625-55175043	1391.54	643.24	-1.11325	2.00872	0.00415	0.14139
Gm6378	18:21072343-21100199	9.40661	4.34955	-1.11281	1.19611	0.0353	0.417147
Gm6781	14:18531362-18532460	37.7749	17.4754	-1.1121	2.03816	0.00055	0.0403981
Mcl1	3:95658720-95663176	39.9004	18.4802	-1.11042	2.60578	0.0002	0.0195433
Gm8116	9:78820637-78821838	9.9576	4.61874	-1.1083	1.89443	0.0016	0.0806254
Gamt	10:80258150-80261012	382.624	177.506	-1.10806	1.44812	0.01385	0.269123
Gm5292	5:43943901-43944483	2.19819	1.02	-1.10775	1.06532	0.12205	0.650492
Gm14138	2:119172499-119217049	10.0731	4.68381	-1.10475	0.787286	0.17915	0.724766
Slc22a30	19:8335370-8405111	64.0928	29.8711	-1.10141	2.24384	0.00095	0.0579755
Snhg6	1:9908637-9944118	31.6975	14.7807	-1.10065	1.71794	0.0062	0.176861
Gm16124	9:53614581-53681265	14.3983	6.72362	-1.09859	0.678278	0.2303	0.773125
Gm11826	4:13482754-13483192	45.9678	21.4659	-1.09858	1.88551	0.00205	0.0938249
Cryl1	14:57275033-57398483	28.8747	13.4862	-1.09832	2.31135	0.0004	0.0322049
Gm6133	18:78349753-78350701	9.15096	4.27513	-1.09796	1.58288	0.01025	0.230765
Tcf19	17:35512733-35516824	3.62938	1.69936	-1.09473	1.42554	0.0189	0.314304
Gm15952	3:35933044-35942717	3.37034	1.57842	-1.09441	0.834723	0.1233	0.652146
4921524J17Rik	8:85408758-85433323	6.09777	2.85641	-1.09408	1.71553	0.00475	0.15265
Gm9200	X:106574345-106710557	2.48653	1.16647	-1.09198	1.23893	0.05365	0.492654
Pnn	12:59066918-59074017	11.4482	5.37071	-1.09193	2.01007	0.00085	0.0538205
Gm8054	8:78869400-78869868	8.96454	4.20576	-1.09186	1.21383	0.03805	0.429763
Casp3	8:46617448-46638706	7.48883	3.51481	-1.09129	1.84242	0.00315	0.120556
Lyrm4	13:35978796-36117357	10.1894	4.78303	-1.09107	2.18167	0.00165	0.0821783
Gm15900	10:127948218-127948560	8.86665	4.16533	-1.08996	0.960301	0.1177	0.643542
Gm28530	9:98287434-98420438	16.1191	7.5746	-1.08953	0.952262	0.1073	0.626102
Ttc5	14:50765414-50785518	3.87236	1.82199	-1.0877	1.41407	0.0223	0.33953
Ncl	1:86344718-86359400	77.8392	36.6346	-1.08729	1.38859	0.0201	0.323673
Rwdd3	3:121155399-121171695	3.84398	1.80935	-1.08713	1.79617	0.01	0.227584
Ces2c	8:104847067-104854483	5.88134	2.76901	-1.08677	0.907783	0.12875	0.660336
Gm4995	X:142533438-142533870	32.7081	15.4213	-1.08473	1.65998	0.0068	0.185731
Acat3	17:12911348-12940402	146.516	69.1066	-1.08416	1.53618	0.0172	0.300177
1700110I07Rik	7:41048658-41048847	6.02402	2.84239	-1.08362	2.22426	0.25005	0.787296
Gm12854	4:116066964-116075071	12.4181	5.86421	-1.08244	0.178769	0.61335	0.945912
Nr6a1	2:38723369-38927688	4.67125	2.20599	-1.08238	0.821891	0.0447	0.459364
Gm16060	3:138742194-138904433	6.17752	2.91939	-1.08136	0.945748	0.12975	0.661849
Zfp182	X:21028938-21062316	2.1797	1.03053	-1.08074	1.63093	0.0136	0.266881
Lect1	14:79637689-79662170	4.0659	1.92277	-1.08039	1.08657	0.05055	0.48199
Fnbp4	2:90745369-90781021	14.0504	6.64496	-1.08028	1.07326	0.07345	0.552969
B230307C23Rik	16:97994600-98010000	6.01406	2.84869	-1.07804	0.654439	0.53065	0.924096
Adamts7	9:90163068-90270804	4.72839	2.24181	-1.07669	0.592481	0.27685	0.8046
Guca1a	17:47394559-47400584	3.73965	1.77413	-1.07579	2.18739	0.01995	0.322526
Fam47e	5:92555068-92591279	14.2894	6.78184	-1.0752	1.34853	0.03	0.389166
Hyi	4:118359989-118409273	85.3021	40.5017	-1.0746	1.79627	0.0042	0.142417
Efna1	3:89271732-89281142	50.3384	23.9512	-1.07156	2.40131	0.00025	0.023074
5830473C10Rik	5:90561208-90597906	46.9231	22.3268	-1.07152	2.47902	0.00025	0.023074
Gm12966	4:129899092-129899902	152.632	72.6301	-1.07141	1.90841	0.00105	0.0617525
2310010J17Rik	7:90124857-90129474	16.1755	7.70478	-1.06999	1.39439	0.01745	0.30236
C730036E19Rik	1:151138033-151142345	6.32519	3.01367	-1.06959	1.66568	0.02145	0.333844
Zfp945	17:22846696-22867134	8.15405	3.88601	-1.06923	1.18485	0.08295	0.577026
Hsd3b2	3:98709254-98724576	10.0175	4.77822	-1.06797	1.70757	0.00585	0.171524
Sult1c2	17:53829636-53846339	9.97745	4.75915	-1.06797	1.85531	0.00185	0.088338
Gkap1	13:58233350-58274188	6.83219	3.25928	-1.06779	1.8023	0.00255	0.106543
Rab26os	17:24488782-24534210	20.1363	9.61498	-1.06645	0.604729	0.41535	0.882463
Tpr	1:150361304-150466165	34.7504	16.5996	-1.06588	0.832904	0.1036	0.618406
Kdm5b	1:134560170-134635285	2.96952	1.41877	-1.06559	1.05583	0.0694	0.541852
Tgm1	14:55700008-55713492	7.6723	3.66676	-1.06515	1.87952	0.001	0.0599471
Nox4	7:87246095-87398710	2.38284	1.13894	-1.06499	1.7006	0.00525	0.161451
Slk	19:47579677-47645246	8.59068	4.11596	-1.06155	1.23083	0.0012	0.0670609
Haus4	14:54541784-54554361	6.88696	3.30035	-1.06125	1.70928	0.0049	0.155407
Gm28900	1:56451406-56451562	133.658	64.0668	-1.06089	1.19945	0.04425	0.457667
Cyp2a5	7:26835304-26843548	1207.82	578.971	-1.06085	1.17557	0.06905	0.540796
Gm5937	X:77456585-77457228	3.63733	1.74567	-1.0591	1.10748	0.0804	0.571072
2200002D01Rik	7:29238328-29248432	3.95377	1.89902	-1.05797	0.433782	0.53805	0.926322
Ddx17	15:79516407-79546741	39.2923	18.8828	-1.05717	1.95002	0.00135	0.0724871
Cdan1,Ttbk2	2:120629125-120850604	6.09813	2.93309	-1.05595	0.768859	0.1211	0.648899
WI1-1003N17.1	1:191997204-192151026	1082.4	522.006	-1.0521	1.75518	0.004	0.138611
Zfp871	17:32771235-32788287	2.81833	1.35979	-1.05146	1.67256	0.0026	0.10781
RP23-204N23.1	1:179924951-179925411	3.82974	1.85076	-1.04913	1.04107	0.0921	0.595814
Hsd17b6	10:127990940-128000678	395.977	191.56	-1.04762	1.88257	0.0031	0.119489
Nek4	14:30951485-30987439	3.62998	1.75829	-1.04579	1.87096	0.0054	0.163634
Ppp2r3d	9:124441769-124442748	10.3611	5.01929	-1.04563	1.02208	0.0703	0.544476
Eif2ak3	6:70844514-70905245	5.28507	2.56179	-1.04477	0.69808	0.09805	0.607702
Dsc2	18:20030632-20059554	15.3754	7.45456	-1.04443	1.85148	0.0016	0.0806254
Hnf1aos1,Hnf1aos2	5:114942157-114998042	24.7693	12.0519	-1.03929	0.483777	0.39255	0.87119
Hirip3	7:126847415-126865377	5.20298	2.53366	-1.03812	0.763063	0.1486	0.689078
Akr1c14	13:4049010-4090422	87.9836	42.8538	-1.03781	2.15669	0.00065	0.0454075
Gm6254	14:122107037-122159604	6.5951	3.21801	-1.03522	0.45925	0.65385	0.955586
Cox6c	15:35371545-35938246	226.349	110.449	-1.03517	1.38137	0.0307	0.392508
Tpp2	1:43933646-44003000	10.1652	4.9607	-1.03502	1.60632	0.00555	0.166447
Gm20545	17:36226814-36227024	15.8846	7.76994	-1.03165	0.734585	0.21245	0.757896
Slc22a29	19:8160164-8218900	9.39157	4.5973	-1.03058	1.38638	0.0221	0.338156
Tmx4	2:134594184-134644145	2.10628	1.0336	-1.02702	1.655	0.00335	0.125152
Rnf152	1:105276913-105361737	4.94002	2.42434	-1.02693	1.78311	0.0016	0.0806254
Izumo4	10:80702692-80705382	5.69675	2.79793	-1.02578	1.27492	0.0357	0.419123
Gm29201	18:12333818-12583013	3.32062	1.63095	-1.02574	0.513932	0.4014	0.875575
Gm12943	4:127141278-127141488	11.8623	5.83107	-1.02455	0.635261	0.2604	0.793251
Cep95	11:106789251-106819930	4.68443	2.30269	-1.02455	0.869836	0.13675	0.672084
Pik3c3	18:30272746-30348126	5.26695	2.58997	-1.02403	2.74794	0.00075	0.0498428
Gm4895	10:22153279-22154416	5.61241	2.76004	-1.02393	1.50323	0.00785	0.200825
Becn1	11:101277967-101302286	88.3557	43.4627	-1.02355	0.436255	0.33465	0.841144
Gm13339	2:22227502-22618252	1107.97	545.155	-1.02318	0.422888	0.68635	0.962433
Mnat1	12:73123716-73273988	5.6176	2.7703	-1.01991	1.54778	0.00975	0.224763
Ints8	4:11191350-11254258	5.21033	2.5697	-1.01978	0.764252	0.15305	0.695317
Gm10916	14:50765414-50785518	7.99229	3.94513	-1.01854	0.6012	0.2581	0.792065
Sult1b1	5:87513338-87538195	16.1474	7.9824	-1.01641	1.56904	0.0064	0.179651
Gm4189	10:127289695-127311786	2.5185	1.24518	-1.01621	0.199016	0.57445	0.936447
Bdh2	3:135281220-135304426	6.81203	3.36991	-1.01538	1.53774	0.03615	0.421512
Usp9x	X:13071497-13173328	8.81101	4.37161	-1.01114	1.00173	0.0922	0.595964
Zfp369	13:65278813-65304221	4.27969	2.12548	-1.00972	1.35299	0.0137	0.267771
Akr1b8	6:34354118-34368463	3.71989	1.84841	-1.00898	1.34362	0.0278	0.375977
Gm9104	17:45448936-45474938	21.2893	10.5831	-1.00836	1.50958	0.01155	0.245499
Gm11246	4:75941237-78214177	4.02218	2.00085	-1.00737	0.130432	0.5843	0.939024
Msantd2	9:37489320-37524148	4.13712	2.05913	-1.00659	1.73225	0.0044	0.14648
Snx32	19:5495277-5510489	2.02799	1.00947	-1.00645	1.31205	0.06505	0.529
Psip1	4:83417723-83486459	8.17309	4.0686	-1.00635	1.10652	0.05075	0.482711
Gm8812	1:66062964-66063376	3.20162	1.59382	-1.00631	0.782727	0.1553	0.697858
Gm15289	13:111361675-111368680	230.322	114.662	-1.00627	1.7247	0.00305	0.118456
Nrg4	9:55208924-55326844	5.18459	2.58215	-1.00566	0.530503	0.32165	0.83308
Gm15795	1:20057778-20618064	6.46024	3.21912	-1.00492	0.556975	0.34735	0.847863
Ap4s1	12:51608540-51738939	9.19479	4.5842	-1.00415	0.864966	0.1506	0.692211
Atp11c	X:60223289-60807993	27.2741	13.5982	-1.00411	1.52637	0.01465	0.276746
Clasrp	7:19581043-19604468	4.96769	2.47725	-1.00384	1.85604	0.01465	0.276746
Gm17199	7:29833619-29859025	2.99303	1.49373	-1.00268	0.552166	0.37705	0.863838
Rnf170-ps	7:26061494-26096196	6.99331	3.49172	-1.00204	0.187205	0.58035	0.937966
Gm4790	7:39566945-39570556	4.78558	2.38993	-1.00172	1.75974	0.00285	0.113516
Gm13487	2:50522123-50522987	3.38214	1.68922	-1.00158	1.16232	0.0644	0.527362
Slc5a6	5:31036035-31054633	6.96087	3.47901	-1.00059	0.454087	0.36685	0.85872
Pmpcb	5:21737140-21757152	154.898	77.4374	-1.00022	1.12135	0.05915	0.510802
Gm7867	1:93305963-93373489	6.33098	3.16845	-0.998649	0.401461	0.64245	0.952984
Chmp5	4:40948406-40965303	21.393	10.7137	-0.997689	2.41927	0.00075	0.0498428
Gm6397	1:143598799-143702893	6.2124	3.1113	-0.997633	1.00874	0.09485	0.601401
Samd8	14:21733393-21798725	3.813	1.9097	-0.997582	1.51011	0.02295	0.344237
Gm3355	17:13482552-13906150	21.3205	10.6799	-0.997344	0.534008	0.3896	0.869766
Gm27216	9:83240480-83254540	73.3409	36.782	-0.995617	1.66216	0.00525	0.161451
Gm16740	3:95181765-95228677	4.40959	2.21468	-0.993548	0.439896	0.49905	0.913942
Polr3gl	3:96576983-96594181	5.4601	2.74337	-0.992979	1.43767	0.16765	0.712309
Rpl27a-ps1	10:61309829-61310276	8.16068	4.1049	-0.991341	1.08975	0.06215	0.520815
Rpl12	2:32876113-32965345	73.9236	37.1967	-0.990861	1.37517	0.03835	0.431191
Gm14857	X:106281911-106285096	2.5564	1.28836	-0.988574	1.55356	0.0083	0.206871
Mup5	4:61831318-61835233	2.86474	1.44578	-0.986556	1.12981	0.0761	0.560742
Med12,Nlgn3	X:101274029-101325963	20.4128	10.3261	-0.983182	0.877392	0.1361	0.671227
Cstf3	2:104590522-104712169	7.82677	3.96031	-0.982804	0.890142	0.1724	0.717274
Gm6039	X:75172714-75396459	3.61373	1.82878	-0.982609	0.699719	0.2744	0.803123
Papd5	8:88199212-88259722	13.4844	6.83912	-0.979404	1.36833	0.02095	0.33031
Gm6484	9:21800183-21852635	68.8767	34.9592	-0.978342	1.72287	0.00785	0.200825
Ppp1r3g	13:35958838-35970388	2.05479	1.04297	-0.978286	0.989442	0.032	0.399361
Gm17971	1:55051318-55072702	3.95233	2.0065	-0.97802	0.497115	0.42415	0.88632
Mup4	4:59956803-59960710	2.50899	1.27394	-0.977808	1.05464	0.10055	0.612542
Gm12870	4:107314362-107359823	3.02774	1.54114	-0.97424	0.468759	0.4988	0.913792
Enpp2	15:54838897-54920146	12.7262	6.48197	-0.973303	1.99595	0.00125	0.0688842
Gm4953	1:159168159-159168642	2.80534	1.42903	-0.973142	0.793085	0.1804	0.725867
Tle3	9:61372365-61418497	4.38378	2.23635	-0.971026	0.890919	0.0366	0.423578
Ank3	10:69533771-70027438	4.01693	2.04965	-0.970716	1.05225	0.01115	0.241011
Rpl35	2:38996712-39006168	131.048	66.9562	-0.968807	1.19237	0.0377	0.428394
H2-Bl	17:36080114-36084223	25.6058	13.0828	-0.968798	1.68306	0.0036	0.130527
Gm5940	X:80456741-80457809	8.28735	4.24104	-0.966491	1.59825	0.0075	0.196126
Gm10653	9:62838784-62875918	10.7364	5.4959	-0.966079	1.06702	0.07385	0.553854
Ighv1-12	12:114615849-114616318	3.26922	1.6755	-0.964358	0.652659	0.4789	0.907205
Homer1	13:93303756-93404129	2.61994	1.34422	-0.962768	1.27964	0.00905	0.216695
9630013D21Rik	4:109569213-109657853	11.9337	6.12593	-0.962039	0.858818	0.17065	0.71552
Sox5os4	6:143828424-144781977	2.38556	1.22481	-0.961774	0.238673	0.62945	0.949866
Gm8228	9:84973052-84976515	7.83853	4.02761	-0.960657	1.87096	0.00275	0.111088
Hmgcs1	13:119690461-119708086	62.7106	32.2707	-0.958486	1.68361	0.00875	0.212945
Tk1	11:117809667-117839908	44.5155	22.9097	-0.958347	0.416579	0.47605	0.906368
Vamp4	1:162570514-162599084	7.07803	3.64423	-0.957734	1.41244	0.01455	0.27599
Gm13502	2:53696120-53696804	29.9811	15.4454	-0.956874	1.31779	0.01895	0.3147
Gm15975	5:55624187-55625593	10.2072	5.26068	-0.956273	1.65605	0.00565	0.16804
Gpr21,Rabgap1	2:37443278-37703859	3.53616	1.82652	-0.953084	0.788234	0.0716	0.548075
Sucnr1	3:60081868-60087566	39.5992	20.4776	-0.951427	1.71344	0.0056	0.167206
Gm5745	9:73175428-73175741	1.94554	1.00634	-0.951051	0.504721	0.4176	0.883461
Ccbl1	2:30185123-30205847	46.5345	24.0858	-0.950121	1.71254	0.00335	0.125152
Rab23	1:33719886-33742564	2.83858	1.47038	-0.948975	1.06449	0.0451	0.461299
Gm12912	4:75147608-75148989	5.54197	2.87296	-0.94786	1.55268	0.0151	0.280834
Hnmt	2:24002909-24049394	11.5958	6.02353	-0.944925	1.8557	0.0029	0.114796
Vegfa	17:46016992-46032377	165.261	85.8906	-0.944176	1.25009	0.01975	0.321089
RP24-498P8.3	9:108096021-108190384	12.4966	6.49677	-0.943743	1.18035	0.0485	0.474847
Cblc	7:19778880-19796809	16.319	8.48427	-0.943689	0.892333	0.1335	0.66743
Trnt1	6:106769119-106800074	7.07301	3.67938	-0.942863	0.654448	0.1002	0.61197
Gm15531	6:97807057-98021349	4.28406	2.23069	-0.941488	0.379422	0.57725	0.937346
Gm10269	18:20682591-20682963	244.304	127.265	-0.940842	1.8254	0.002	0.092594
Nlrp6	7:140920901-140929192	108.504	56.5317	-0.940611	1.8483	0.00575	0.169875
Gstm6	3:107938846-107943749	47.7061	24.8716	-0.939675	1.88071	0.00195	0.0912885
Gm20784	13:119962243-119963227	3.41586	1.78094	-0.939608	1.13333	0.0791	0.568352
Rpl21-ps15	X:151198077-151471842	51.5522	26.8845	-0.939257	1.43222	0.01925	0.317152
Wdr6	9:108569885-108578739	8.35153	4.35533	-0.939257	1.26568	0.0363	0.422283
1700113A16Rik	3:88142371-88177785	2.7373	1.42804	-0.938717	0.311243	0.71175	0.966662
Hsf4	8:105269800-105275845	5.0209	2.62142	-0.937597	1.33	0.0233	0.346793
Ppib	9:66060168-66069731	226.989	118.53	-0.937367	1.78158	0.00155	0.0790897
Zcchc11	4:108459425-108559421	15.5534	8.12918	-0.93605	0.982683	0.0792	0.568665
Col27a1	4:63214003-63334991	2.85369	1.49297	-0.934645	1.0484	0.0809	0.572467
Hhex	19:37434809-37440731	55.6511	29.1363	-0.933592	2.36957	0.00155	0.0790897
Gm14336	2:173920351-173920826	23.6985	12.4088	-0.93343	1.36703	0.01665	0.295167
N4bp2l1	5:150571642-150594525	27.3796	14.356	-0.931449	1.89274	0.0012	0.0670609
Gm15727	5:117319265-117355005	4.03324	2.11604	-0.930572	0.501733	0.3146	0.82887
Timm44	8:4259730-4275913	41.5151	21.7826	-0.930464	1.29523	0.0276	0.374809
Gm6134	6:112976212-112976383	7.13551	3.74411	-0.930394	1.34086	0.5886	0.939952
Acat2	17:12942889-12960747	54.944	28.8313	-0.930327	2.14637	0.0128	0.258645
Vldlr	19:27216483-27254231	4.8081	2.52392	-0.929799	0.986279	0.0175	0.302888
Commd2	3:57642903-57651715	22.1119	11.6182	-0.928443	1.72679	0.00445	0.147381
Taf1d	9:15283336-15312104	5.3203	2.79619	-0.928047	0.309934	0.59345	0.941328
BC002059	17:16951538-16974157	2.30067	1.21104	-0.925812	1.4182	0.08875	0.589438
Gm6195	1:9798106-9900845	8.99987	4.73753	-0.925769	0.376504	0.596	0.941845
Gm12469	4:54235669-54235876	51.1446	26.9499	-0.924303	0.966668	0.0947	0.600971
RP24-549O22.1	3:60860706-60861085	2.20005	1.15939	-0.924176	0.639926	0.37745	0.864043
Gm21181	13:119912094-119929272	2.84141	1.49749	-0.924058	0.543151	0.30305	0.821351
Snhg5,Snord50a,Snord50b	9:88521049-88522929	8.34616	4.40056	-0.923424	0.830991	0.0843	0.580383
Cetn3	13:81778772-81797143	18.3841	9.69347	-0.92337	1.58139	0.01	0.227584
RP24-468O23.2	3:28697902-28781108	42.4783	22.4245	-0.921654	0.4217	0.48465	0.90954
Med21	6:146602351-146650602	22.2986	11.7716	-0.921645	0.537682	0.42655	0.887469
Gm11633	11:97923237-97986444	72.2954	38.1809	-0.921052	2.10193	0.01025	0.230765
Brd9	13:73937837-73960894	4.47789	2.36705	-0.919731	1.57087	0.0079	0.201455
Gm5883	6:123218952-123219447	7.69588	4.07115	-0.918651	1.06501	0.05845	0.508492
Cyp3a11	5:145854425-145879964	947.492	501.408	-0.918127	1.21855	0.0305	0.391725
Clec2d	6:129180614-129186534	167.944	88.8979	-0.917764	1.61883	0.00535	0.162687
Nupr1	7:126623248-126630861	4.26166	2.25589	-0.917722	0.759845	0.15295	0.695177
RP23-442I7.3	3:4890265-4891231	2.80925	1.48746	-0.917332	0.971225	0.1008	0.613263
Zfp7	15:76879258-76892392	2.16212	1.1455	-0.916478	1.5401	0.04285	0.451367
Ythdc1	5:86804220-86836659	10.2911	5.45326	-0.916206	1.34438	0.0167	0.295534
Rps12-ps17	X:125547772-125548171	23.1695	12.2965	-0.913979	1.21306	0.04285	0.451367
Gm6161	1:9547947-9631175	7.49573	3.97841	-0.913878	0.470158	0.4942	0.912488
Gm8618	1:134109367-134109799	4.82597	2.56143	-0.913869	0.821238	0.14805	0.68842
Gsta4	9:78191965-78209348	108.877	57.8419	-0.912508	1.74169	0.00345	0.127343
Stk38l	6:146724994-146778812	2.74623	1.45953	-0.911951	1.63862	0.0317	0.397855
Dguok	6:83480216-83506969	23.6971	12.6002	-0.91126	0.983261	0.09175	0.595192
Tmem68	4:3549040-3574853	3.51425	1.86869	-0.911192	1.07313	0.02125	0.332439
Grid1	14:34819824-35583379	3.47913	1.85055	-0.910769	0.547719	0.2878	0.81151
Gm4968	6:127233761-127234619	4.83549	2.57294	-0.910248	1.11133	0.05495	0.497229
Znhit6	3:145576207-145605245	2.96683	1.57874	-0.910154	1.42384	0.0156	0.285615
Zfp143	7:109998375-110151202	2.67724	1.42513	-0.909648	0.785454	0.22135	0.765453
Tcea3	4:136247728-136274898	25.3982	13.5231	-0.909308	1.74914	0.0022	0.0976793
Rps12-ps12	X:124599363-124599762	20.0968	10.7055	-0.908616	1.19467	0.04035	0.440741
Gm8775	3:4211717-4213044	3.96491	2.11298	-0.908009	1.36375	0.02365	0.349158
Gm10074	17:36226022-36226271	8.7936	4.68641	-0.90797	0.596167	0.2971	0.817182
Gys2	6:142422612-142473109	171.491	91.4118	-0.907676	0.786044	0.16445	0.708716
Gm13981	2:117055565-117056012	4.08465	2.17775	-0.907375	0.801871	0.17885	0.724606
Abca8b	11:109932189-109995845	7.22873	3.85426	-0.907289	1.78492	0.0021	0.0950511
Msh3	13:92211871-92389053	8.73932	4.66221	-0.906508	0.655507	0.18955	0.735694
Zranb2	3:157534159-157548390	16.5155	8.81313	-0.906099	1.7162	0.0057	0.168947
Gm7722	X:46473584-46774099	7.30271	3.89879	-0.905405	1.06398	0.0583	0.507981
Sfpq	4:127021323-127061152	45.8533	24.488	-0.90495	0.849963	0.1233	0.652146
Gm8880	X:88959216-88959670	23.3455	12.4742	-0.904195	1.32489	0.02505	0.358963
Gm15443	1:149025227-149026047	5.80098	3.10033	-0.903873	1.3284	0.04535	0.46241
Haus1	18:77757566-77767780	3.7998	2.03242	-0.902722	1.10538	0.05485	0.496927
Gm4849	1:19330938-19333184	3.57356	1.91378	-0.900936	2.08123	0.011	0.239449
Cyp2r1	7:114550165-114562972	7.57595	4.05835	-0.900535	1.54656	0.0078	0.200206
Papss2	19:32620004-32667187	56.6509	30.3555	-0.90014	1.7167	0.0049	0.155407
Slc2a2	3:28697902-28781108	140.189	75.1877	-0.898808	1.39317	0.0242	0.353082
Snrnp25	11:32205414-32208984	6.50158	3.48821	-0.898305	0.948099	0.10295	0.617165
Dhcr7	7:143823144-143848410	27.6599	14.8438	-0.89794	1.01372	0.02375	0.349872
Gm6767	16:51362451-51363832	184.97	99.2732	-0.897818	2.1949	0.00315	0.120556
Ccdc71l	12:32378703-32382943	1.95351	1.04866	-0.897518	1.44746	0.01535	0.283222
Gm6793	8:112011358-112020528	6.62165	3.55457	-0.897517	0.989461	0.0932	0.598133
Rnf19b	4:129058270-129085886	22.9805	12.3427	-0.896748	1.59279	0.0093	0.219494
Gm12944	4:127021323-127061152	72.1179	38.7404	-0.896516	0.665708	0.23325	0.775124
Nabp1	1:51465861-51478425	3.20322	1.72151	-0.895847	1.41447	0.0159	0.288079
Gpcpd1	2:132529081-132587729	14.003	7.5265	-0.895684	1.57914	0.00585	0.171524
Rad1	15:10486017-10499063	3.35093	1.80164	-0.89525	1.04892	0.06805	0.537801
Simc1	13:54503778-54565435	3.33104	1.791	-0.895204	0.433783	0.2562	0.791174
Nit2	16:57156670-57167332	68.3436	36.7588	-0.894716	1.93319	0.00185	0.088338
Atg16l2	7:101289391-101302251	14.1878	7.6353	-0.89389	1.12831	0.06475	0.528301
Gm5459	14:31019137-31128930	9.38702	5.05311	-0.893497	0.442589	0.5659	0.934299
Noxo1	17:24696233-24707660	4.23148	2.27791	-0.893451	0.461349	0.41325	0.881282
6430550D23Rik	2:155956457-156007977	2.24733	1.21049	-0.892616	0.361637	0.3179	0.830973
Otud6b	4:14809497-14826587	9.81947	5.28971	-0.892457	1.7301	0.0036	0.130527
Hiatl1	13:65064662-65112982	9.05203	4.87869	-0.891746	1.38465	0.0103	0.231346
Gm8724	6:128530917-128531304	2.00262	1.07968	-0.891286	0.557362	0.3345	0.841042
Car1	3:14766215-14808368	3.18245	1.71596	-0.891122	0.705824	0.1917	0.737983
Isg20l2	3:87919505-87940686	6.04184	3.26027	-0.889998	0.685395	0.24185	0.781522
Pi4kb	3:94974730-95015448	31.0037	16.7376	-0.889344	0.854092	0.1485	0.688957
Sep15	3:144570303-144597680	122.348	66.0833	-0.888638	1.89657	0.0021	0.0950511
Gm11619	11:101353308-101353545	2.21402	1.19635	-0.888028	0.587061	0.59725	0.942146
Gm14032	2:55292064-55293090	2.47344	1.33884	-0.88553	0.98786	0.1105	0.631418
Prkaa2	4:105029873-105109890	7.71684	4.18017	-0.884447	1.80797	0.0019	0.0898278
Gm12508	4:55131207-55279479	5.61945	3.04423	-0.884353	0.884101	0.1196	0.646682
Gm8602	6:4359026-4359507	2.95303	1.59982	-0.884288	0.685469	0.2099	0.755627
Gm5093	17:46439577-46440099	30.7574	16.6706	-0.883626	1.5768	0.01185	0.248853
Gm15129	X:150397772-150459154	7.05505	3.82447	-0.883397	0.453926	0.6794	0.961059
Zfp120	2:150114405-150136708	2.55657	1.38725	-0.881984	1.40452	0.01155	0.245499
Lin52	12:84451507-84531533	2.66658	1.44765	-0.881275	1.26705	0.0354	0.417508
Kin	2:10080592-10092806	11.3958	6.18724	-0.881139	1.48333	0.02775	0.375615
Ropn1l	15:31441209-31453689	16.1147	8.74957	-0.881097	1.37883	0.0139	0.269504
Slc35a5	16:45139572-45158706	5.34174	2.90259	-0.879971	1.07215	0.0392	0.43513
Set	2:30057377-30072577	21.4675	11.666	-0.879837	1.7719	0.00705	0.189449
1810008I18Rik	7:65803110-65806449	44.5612	24.2219	-0.879475	1.45546	0.0124	0.254481
E430025E21Rik	15:59331997-59374167	6.08887	3.3111	-0.878866	1.84201	0.00485	0.154584
Exosc8	3:54692822-54735393	16.6721	9.07554	-0.877379	0.729359	0.19335	0.739758
Zfp949	9:88548019-88571061	5.0209	2.73471	-0.876557	0.937684	0.1018	0.615229
Mup-ps21	4:62029341-62031662	4.77817	2.60339	-0.876068	0.783277	0.1802	0.725587
Gm4853	X:38396934-38397328	17.6977	9.64871	-0.875154	1.08368	0.074	0.554332
Slc46a3	5:147878436-147894815	41.3172	22.5293	-0.874943	1.08922	0.0612	0.51772
Cdk2	10:128697938-128705051	5.02082	2.74184	-0.872779	1.48329	0.01365	0.267355
Dhx57	17:80238303-80297473	2.39958	1.3104	-0.872777	1.3264	0.03765	0.428217
Gm14026	2:129158665-129180667	14.4043	7.86956	-0.872146	1.77569	0.00355	0.129457
Gm3851	1:119652466-119837613	9.07072	4.95905	-0.871153	0.457167	0.4168	0.883067
Gm5321	7:6019021-6019468	4.40962	2.41178	-0.870555	0.734408	0.1833	0.729098
Maff	15:79347540-79359072	5.94634	3.25751	-0.868232	1.39912	0.0183	0.309673
Snai2	16:14705851-14709395	4.14822	2.27248	-0.868226	1.38722	0.0269	0.370857
Nek3	8:22128282-22166435	2.00089	1.09762	-0.866259	0.891738	0.1043	0.619795
4932438A13Rik	3:36863105-37060035	8.38045	4.59725	-0.866258	1.08565	0.04255	0.450204
Gm11423	11:82779600-82781042	4.68984	2.57391	-0.865576	0.903936	0.12575	0.655981
Gm7329	1:65095226-65095436	294.615	161.793	-0.864676	1.43269	0.01475	0.277846
Syt1	10:108497649-109010982	2.96438	1.62822	-0.864434	1.40741	0.0093	0.219494
Usp48	4:137593754-137658537	27.5754	15.1467	-0.864378	1.07149	0.0818	0.57443
Thoc7	14:13918443-13961225	47.3578	26.0193	-0.864023	1.79331	0.0025	0.10528
Tusc2	9:107551554-107572779	119.821	65.85	-0.86363	0.516127	0.2673	0.79831
Dock5	14:67751927-67933572	2.22364	1.22272	-0.862825	2.02039	0.00315	0.120556
Zcchc9	13:91796532-91807705	13.0655	7.18698	-0.862309	0.951987	0.09115	0.59404
Gm6665	18:31804056-31908987	654.96	360.328	-0.862095	1.2339	0.04535	0.46241
Hnrnph3	10:62980222-63024217	14.4661	7.95874	-0.862068	1.02862	0.1029	0.617064
Gm23924	6:74451796-74451904	10.5413	5.80417	-0.860893	2.87383	0.66905	0.95916
Gm13653	2:75138841-75322897	16.6122	9.14891	-0.860569	0.193296	0.60725	0.94437
Sertad1	7:27486909-27490316	13.1638	7.25026	-0.860466	1.35403	0.02655	0.368568
Zpr1	9:46273063-46282643	57.6659	31.7666	-0.860207	1.0069	0.02765	0.375119
Ppwd1	13:104205120-104228844	1.92552	1.06149	-0.859162	1.2075	0.0385	0.431888
Gm10343	16:10801368-10801716	26.6958	14.7168	-0.859147	1.17251	0.05035	0.481129
Pltp	2:164830731-164857711	50.1424	27.6439	-0.859071	0.677397	0.22855	0.771761
Sf3a3	4:124714775-124732460	8.29465	4.57308	-0.859015	1.45426	0.01685	0.297088
Gm9531	9:81677597-81678677	73.3763	40.4626	-0.858724	1.55955	0.00965	0.223633
Esco1	18:10566601-10610352	3.29309	1.81652	-0.858265	1.20917	0.04755	0.471177
Ugp2	11:21321137-21374161	129.451	71.4314	-0.85778	1.38456	0.015	0.28005
Gm10045	17:29308137-29308620	46.2631	25.5302	-0.857657	1.54927	0.00945	0.221227
Uchl4	9:64185769-64253631	11.1348	6.14659	-0.857219	0.644734	0.2823	0.807784
Pkn1	8:83666832-83699179	25.6596	14.1757	-0.856076	0.921752	0.112	0.633915
Snx25	8:46033260-46195590	9.16733	5.06463	-0.856045	0.58701	0.31	0.825994
Rps12-ps11	X:124469958-124470357	19.0805	10.5492	-0.854969	1.13736	0.0547	0.496268
Cntrob	11:69299486-69323775	4.29282	2.37444	-0.854338	0.70958	0.1719	0.716922
Mup21	4:62147931-62150863	101.332	56.1224	-0.852443	1.74212	0.0068	0.185731
Hmgn5	X:109004533-109013404	15.7268	8.72455	-0.850071	1.83278	0.0044	0.14648
Supv3l1	10:62429208-62451322	36.7519	20.3888	-0.850042	0.376086	0.11265	0.634961
Gm27219	9:36813132-36813874	9.46853	5.25345	-0.849877	1.30367	0.03035	0.391025
Gmnn	13:24751844-24761923	8.3767	4.64787	-0.849813	1.21127	0.0216	0.334766
Gm15028	X:20797813-20921004	9.8905	5.48879	-0.849557	0.20747	0.697	0.964148
Slc25a37	14:69241847-69305355	9.04171	5.01975	-0.84898	1.5797	0.0199	0.322235
Apbb2	5:66298860-66618828	2.33551	1.29807	-0.847369	0.596364	0.0848	0.581408
Bccip	7:133686242-133881532	147.187	81.9269	-0.845239	1.01247	0.08875	0.589438
Sgce	6:4674349-4747204	3.79581	2.11428	-0.844242	0.93731	0.08095	0.572527
C1qbp	11:70977835-70983026	90.3672	50.355	-0.843665	1.74712	0.0056	0.167206
Aifm3	16:17489610-17507485	2.02149	1.12649	-0.843579	1.00137	0.07855	0.56698
Rdh13	7:4424769-4445649	7.31997	4.07914	-0.843572	0.6409	0.0951	0.601901
Rpl38	11:114668523-114672331	88.7874	49.4985	-0.84297	1.56473	0.0165	0.293738
Cep57l1	10:41718839-41809871	2.86964	1.59997	-0.842827	1.03103	0.0422	0.448654
Gm6736	12:13269126-13583810	2.23852	1.24819	-0.842707	0.398246	0.54105	0.927152
Hao2	3:98874576-98893239	27.3979	15.2929	-0.8412	1.66734	0.00715	0.190925
Nadsyn1	7:143795583-143822849	13.4743	7.52258	-0.840906	1.00184	0.0647	0.528286
Gm16378	8:119910359-124345724	94.0698	52.5497	-0.840049	0.079579	0.54525	0.928501
Fchsd2	7:101108774-101284405	4.94949	2.76717	-0.838867	0.822667	0.08365	0.578837
Gm6576	15:27025385-27026207	66.8839	37.3976	-0.838713	1.6468	0.0048	0.153687
Psph	5:129765557-129787252	6.21643	3.47783	-0.837896	0.91716	0.1253	0.655128
Gm13094	4:150228034-150228443	8.06882	4.51679	-0.837059	0.82151	0.1484	0.688853
RP24-550N13.2	3:49603560-49603876	3.16543	1.77343	-0.83586	0.493952	0.33555	0.841547
Fam208a	14:27428846-27508460	2.57376	1.44207	-0.835731	1.43968	0.01425	0.273051
Ccdc141	2:77009901-77170636	10.1948	5.71545	-0.834895	0.629047	0.2882	0.811741
Fndc3a	14:72537945-72710003	8.20077	4.5996	-0.834252	1.01537	0.01745	0.30236
Rpl23a-ps1	1:45981547-45982012	5.71661	3.2064	-0.834202	0.823876	0.1479	0.688127
Sh3gl1	17:56005710-56036637	11.7759	6.60943	-0.833245	0.637812	0.2787	0.80578
Col5a3	9:20770049-20815067	3.60417	2.02389	-0.832535	1.379	0.0271	0.371895
Hnrnpd	5:99958425-99978938	45.2355	25.4185	-0.831578	1.18178	0.05245	0.48874
Gm8731	18:60778982-60779394	5.36923	3.01777	-0.831231	0.777778	0.1631	0.707018
2700029M09Rik	8:60890417-60907580	6.45797	3.63159	-0.830479	0.987614	0.1016	0.614848
Upf2	2:5951468-6056703	4.83919	2.72144	-0.830393	1.31622	0.01725	0.300642
Gm10268	18:38238404-38262629	76.0672	42.7882	-0.830064	0.814929	0.17695	0.722421
Pnisr	4:21847582-21876475	37.0338	20.8433	-0.829262	0.666111	0.15725	0.700371
Gm15638	16:45746242-46010218	11.1805	6.29444	-0.828838	0.327188	0.4446	0.895134
Ccdc57	11:120826528-120932872	2.00943	1.13131	-0.828791	0.754458	0.16235	0.70633
Gm12242	11:57449106-57449844	4.53014	2.55072	-0.828652	0.910326	0.10515	0.621585
Prpf40b	15:99295086-99317018	15.5422	8.76159	-0.826928	0.927395	0.09225	0.59606
Nr1d2	14:18204053-18239127	18.0544	10.1834	-0.82613	1.61844	0.0077	0.198899
Bahcc1	11:120232946-120292296	2.78844	1.57298	-0.825957	0.884245	0.1195	0.646507
Scd2	19:44293675-44306864	1.78593	1.00824	-0.824834	0.378117	0.2091	0.754745
Gm5970	18:60212079-60247820	3.04325	1.71868	-0.824311	0.25536	0.77485	0.975825
Zbtb12	17:34856373-34898265	6.56801	3.7096	-0.82419	0.102217	0.5951	0.941693
Eef2k	7:120842830-120907219	4.05207	2.29215	-0.821958	0.532207	0.18725	0.733027
Gm13537	2:33133416-33371486	3.15516	1.78503	-0.821763	0.188412	0.69605	0.964061
Gm11631	11:98063887-98064043	22.6255	12.8007	-0.821723	0.802048	0.38785	0.869092
RP23-433P9.3	1:184695033-184695461	7.0849	4.00854	-0.82167	0.863177	0.13555	0.670564
Hbs1l	10:21295978-21368889	28.0767	15.8859	-0.821628	1.90542	0.00335	0.125152
Fam135a	1:24011092-24100341	5.86383	3.31907	-0.821066	1.0494	0.0499	0.479781
Gps2	11:69913887-69916591	19.7444	11.179	-0.82065	1.18342	0.06495	0.528995
Cyp2c54	19:40037940-40073811	148.126	83.9059	-0.819981	1.6667	0.0164	0.292867
Gm16174	7:19808461-19822770	4.91975	2.78859	-0.819049	0.265561	0.68665	0.962438
Gm11235	4:72542665-72542998	11.0349	6.25618	-0.818721	0.854266	0.13105	0.664
Apol7a	15:77388220-77399110	104.154	59.0568	-0.818546	1.4083	0.01005	0.228025
Akr1c6	13:4434305-4457530	613.379	347.876	-0.818207	1.37804	0.0142	0.272457
Gyg	3:20122083-20155317	3.21436	1.82331	-0.817974	1.20912	0.0374	0.427225
Cox5a	9:57521231-57543187	194.403	110.289	-0.817762	1.79194	0.0139	0.269504
Gm11517	11:96789126-96808640	1.88674	1.07115	-0.816729	0.193679	0.7389	0.970781
Iah1	12:21316391-21373632	211.375	120.064	-0.816003	1.73829	0.015	0.28005
Abcb11	2:69238281-69342616	344.189	195.525	-0.81585	0.894081	0.12105	0.64879
Xrn2	2:147012995-147078000	12.9254	7.34767	-0.814849	0.645262	0.1916	0.737849
Uimc1	13:55027879-55100300	8.94103	5.08638	-0.813801	0.430426	0.2895	0.812418
Gm19503	1:151520446-151520687	58.6799	33.3869	-0.813585	1.08068	0.0622	0.520953
Paxbp1	16:90936091-91044543	9.42063	5.36211	-0.813024	0.775816	0.154	0.696526
Serf1	13:100106794-100114571	14.6341	8.33409	-0.81224	1.18301	0.037	0.425394
Zfp429	13:67389308-67399767	1.78974	1.02017	-0.810947	1.09761	0.10245	0.616259
Rarb	14:16430841-16575472	2.30489	1.31524	-0.809371	1.20883	0.0329	0.404578
Sept10	10:59164112-59221847	2.40282	1.37146	-0.809013	1.20178	0.03975	0.43809
Gsap	5:21186266-21291701	3.74077	2.13578	-0.808574	1.46007	0.0137	0.267771
Axin1	17:26138687-26195811	12.4131	7.09089	-0.80782	0.66288	0.09605	0.603791
Gm10155	7:126299433-126299916	35.8508	20.4848	-0.807448	1.34389	0.02115	0.331849
Gm10319	6:122136627-122152016	14.546	8.31722	-0.806453	1.27253	0.02505	0.358963
Gbas	5:129725062-129758327	14.1622	8.09845	-0.806331	0.425611	0.1489	0.689748
Zc3hc1	6:30366379-30391028	16.2922	9.31802	-0.806088	0.783992	0.16985	0.714578
Ube2q1	3:89773608-89783997	12.4914	7.14675	-0.805575	1.78234	0.00545	0.164587
Hnrnpdl	5:100033576-100039664	37.931	21.7169	-0.804557	1.51381	0.03475	0.414631
Tnfaip8	18:49979426-50107173	3.08057	1.76411	-0.804259	0.830455	0.06755	0.536466
Mllt3	4:87769924-88033364	1.88134	1.07771	-0.803793	0.706179	0.15765	0.700754
Ppp1r2-ps1	17:6310546-6493180	2.53166	1.45052	-0.803514	0.343259	0.67605	0.960448
Gm8292	1:55248657-55363469	95.8643	54.9408	-0.803115	1.4028	0.01235	0.253986
Ppp1r15a	7:45472955-45526268	25.8488	14.8223	-0.80233	0.250548	0.5996	0.942728
Sox6os	7:115471343-116038744	4.92172	2.82251	-0.802185	0.334874	0.65115	0.95486
Gm12074	11:27051696-27051915	6.02347	3.45465	-0.802055	0.650789	0.5126	0.918398
Tubd1	11:86544990-86567360	1.95423	1.12095	-0.801878	0.84156	0.1589	0.702015
Slc4a1ap	5:31514568-31554042	8.60946	4.93909	-0.801678	0.81796	0.15715	0.700185
Elovl6	3:129532385-129638495	6.26677	3.59545	-0.801551	1.63346	0.01615	0.29049
Dclk3	9:111439080-111489608	6.12985	3.51925	-0.800583	1.49963	0.02045	0.326642
Hamp2	7:30922371-30924181	671.389	385.489	-0.800459	1.45868	0.01425	0.273051
Zfp451	1:33761544-33814595	3.07397	1.76519	-0.800284	0.837098	0.0431	0.452453
Stap2	17:55997080-56005570	18.7362	10.7607	-0.800057	1.60206	0.00785	0.200825
Ino80	2:119373041-119477687	3.05893	1.7574	-0.799579	1.40699	0.0119	0.249411
Srsf10	4:135855746-135869908	7.5588	4.34484	-0.798855	1.07607	0.0144	0.274416
Gm10925	1:24613973-24614651	22233.9	12780.8	-0.79878	0.976655	0.08065	0.571719
Nsun6	2:14995130-15082456	2.66484	1.53273	-0.797946	0.275805	0.4242	0.88635
Dcun1d4	5:73481001-73560794	11.5866	6.66528	-0.797724	1.88537	0.00385	0.135556
Slc16a12	19:34668402-34747289	17.5617	10.1135	-0.79615	2.18219	0.0092	0.218378
Ppm1k	6:57506501-57535426	16.2339	9.35411	-0.795339	2.04782	0.00725	0.192478
Gtf3c6	10:40249202-40257665	11.5683	6.66635	-0.795208	1.39683	0.02165	0.334956
Kbtbd2	6:56777523-56797813	3.781	2.1793	-0.794907	0.878268	0.05735	0.505005
1190002N15Rik	9:94517863-94538081	12.2394	7.05503	-0.794814	1.67781	0.0061	0.175458
RP24-97D20.2	3:84160438-84305446	3.86229	2.22638	-0.794757	0.38549	0.4575	0.899712
Slc35d1	4:103170648-103215164	31.3974	18.1019	-0.794504	1.67141	0.0106	0.234899
Ndufa4	6:11900372-11907446	517.213	298.392	-0.793548	1.56414	0.0083	0.206871
Upf3a	8:13785614-13798538	12.6608	7.30845	-0.792734	1.57089	0.01445	0.274961
Brd7	8:88331038-88362194	37.6892	21.7596	-0.792504	0.917812	0.136	0.671133
Tprkb	6:85915737-85930284	98.6352	56.9508	-0.792388	1.35056	0.00695	0.187982
Fundc2	X:75172714-75396459	10.3743	5.99096	-0.792151	0.393274	0.45055	0.897538
Bend3	10:43479139-43515396	1.97409	1.14005	-0.792097	1.47099	0.01685	0.297088
Hdac2	10:36974543-37001889	8.49997	4.91	-0.791733	0.966131	0.1223	0.651033
Gm5453	13:98839018-98926384	110.326	63.743	-0.791427	0.730958	0.2095	0.755238
Gal3st1	11:3983635-3999326	6.05951	3.50279	-0.790698	1.31016	0.03485	0.415094
Fasn	11:120805939-120824178	125.33	72.4633	-0.790408	0.639814	0.291	0.813321
Myo10	15:25622524-25813673	5.22305	3.02208	-0.78935	0.752685	0.0396	0.43733
Slc22a28	19:8062208-8131982	21.8808	12.6721	-0.788015	1.66853	0.0111	0.240502
Ankib1	5:3689999-3803109	3.05202	1.7681	-0.787565	1.64826	0.01005	0.228025
RP24-374C7.1	12:113381010-113381561	8.23515	4.7714	-0.787384	0.966315	0.10915	0.629232
Proscos	8:27042376-27056131	6.06628	3.51557	-0.787054	0.236978	0.65875	0.95683
1810013L24Rik	16:8830099-8858916	5.88868	3.41589	-0.785683	1.86333	0.00905	0.216695
Gm6433	5:141241489-142215586	56.6389	32.8586	-0.785524	1.57077	0.0074	0.194644
Spata24	18:35656689-35662186	3.21015	1.8627	-0.785248	0.808527	0.1611	0.704759
Rasa4	5:136083915-136111860	1.90438	1.1052	-0.785006	0.43085	0.17855	0.724233
Mapk6	9:75369061-75410005	8.58663	4.98662	-0.784029	0.997635	0.02385	0.350611
Nr3c1	18:39410544-39491301	14.9138	8.66238	-0.783808	0.827028	0.0586	0.509072
Cdk13	13:17715961-17805097	3.18807	1.85205	-0.783557	2.06582	0.0075	0.196126
2410004B18Rik	3:145938013-145944829	9.00664	5.23321	-0.783294	0.90203	0.11305	0.63562
Cd9	6:125460265-125499668	8.6224	5.01172	-0.782783	1.17786	0.0404	0.441029
Gm8074	9:78321298-78322357	3.2259	1.8753	-0.782582	0.405627	0.4678	0.903711
Gm16973	14:56668247-56701268	1.87901	1.09232	-0.78257	0.509759	0.38705	0.86872
Gm10157	9:118606689-119043998	222.208	129.184	-0.782486	0.868509	0.1526	0.694933
Kdm3a	6:71588973-71632905	3.65428	2.12464	-0.782367	1.45777	0.01615	0.29049
Smlr1	10:25527942-25536267	81.7373	47.5251	-0.782305	1.35074	0.02	0.322914
Ctc1	11:69015910-69036473	4.68987	2.72756	-0.781938	0.541951	0.3172	0.830395
Gas1	13:60174404-60177365	11.2315	6.53337	-0.781646	1.53276	0.0102	0.23014
Ccnl2	4:155812488-155824543	51.9398	30.2342	-0.780656	1.26456	0.0248	0.357193
Rpsa-ps12	4:149142496-149143388	29.5427	17.2012	-0.780294	1.48842	0.01125	0.241993
Gm16416	13:103397108-103397591	11.5841	6.7494	-0.779317	1.03695	0.07755	0.564176
Fbxo11	17:87975049-88065291	6.36406	3.71038	-0.778379	1.15671	0.0875	0.587184
Snx30	4:59805839-59904737	27.2155	15.8724	-0.777911	0.864469	0.128	0.659247
Daam1	12:71831077-71992367	5.44958	3.18	-0.777118	1.8958	0.01	0.227584
Hnrnph2	X:134601178-134607060	16.9737	9.9049	-0.777086	1.65405	0.00885	0.214274
BC052040	2:115581715-115778768	2.23298	1.30328	-0.776822	1.2111	0.0386	0.43232
Chchd1	14:20703026-20704417	44.1494	25.7802	-0.776132	1.41071	0.01455	0.27599
Calcoco1	15:102706778-102722178	22.983	13.4426	-0.773762	1.25455	0.06515	0.529328
Tmem106a	11:101582241-101591788	7.17721	4.19943	-0.773228	1.19351	0.0375	0.427555
Hsd3b3	3:98741523-98763128	87.9495	51.4663	-0.773048	1.45099	0.01555	0.28519
Dhfr	13:92211871-92389053	8.65929	5.0692	-0.772491	1.54076	0.03065	0.3923
Pde4b	4:102087542-102607259	3.40708	1.9953	-0.771929	1.2195	0.01485	0.278758
Gm4835	18:15988367-15989339	6.23931	3.654	-0.771909	1.1541	0.0491	0.476925
Dffb	4:153964448-153975126	3.73956	2.19028	-0.771755	0.462878	0.29675	0.817097
mt-Nd4,mt-Nd4l	MT:9876-11544	30404	17811.8	-0.771428	0.606929	0.21245	0.757896
Gm28659	1:10868687-10869446	2.10367	1.23414	-0.769401	0.78072	0.19305	0.739377
Acot10	15:20665218-20666750	2.07451	1.21768	-0.768638	0.954024	0.1162	0.64105
Cenpl	1:161070712-161086724	3.18714	1.87116	-0.768328	1.08849	0.0455	0.463065
Zbtb44	9:31030643-31075879	6.63568	3.89658	-0.768036	1.60834	0.0139	0.269504
Sept1	7:127214446-127218498	4.29366	2.52362	-0.766716	0.638291	0.2038	0.749849
Gm15702	1:25067475-25829707	3.61509	2.12479	-0.766709	0.571594	0.30245	0.820823
Gm11954	11:4002456-4002805	1.75398	1.03109	-0.766453	0.537326	0.4972	0.913308
Ppp1r2-ps3	19:30538927-30539554	5.88927	3.46368	-0.765783	0.869227	0.13735	0.673036
Azgp1	5:137981520-137990233	1603.48	943.136	-0.765669	1.28099	0.03545	0.417728
Srek1	13:103741614-103764504	5.67981	3.3413	-0.765436	1.34989	0.0163	0.292005
Rasa1	13:85189407-85289029	16.0878	9.46703	-0.764981	0.714027	0.269	0.799434
Brwd1	16:95992091-96082526	10.2516	6.03295	-0.764908	0.794902	0.078	0.565551
Mir142hg	11:87755576-87757270	4.17241	2.45547	-0.764882	0.630094	0.4135	0.881442
Rpl21-ps4	14:11227551-11227992	15.9476	9.3893	-0.76425	1.06166	0.063	0.523571
Gm21887	X:170009658-170019281	24.8818	14.6512	-0.764066	1.24825	0.05365	0.492654
Scnm1	3:95129535-95134011	11.7807	6.93739	-0.763958	1.0228	0.10965	0.629922
Gm13410	2:24178833-24180317	2.05915	1.21295	-0.763531	0.961876	0.1308	0.663581
Slbp	5:33634951-33652574	10.436	6.14883	-0.763183	1.31061	0.22645	0.770049
Itga6	2:71745615-71858416	1.76295	1.03883	-0.763029	0.751086	0.11205	0.633948
Tef	15:81800790-81826861	61.3251	36.1365	-0.763023	0.964847	0.0365	0.423262
Herpud2	9:25108129-25151781	9.73415	5.73712	-0.762727	1.72572	0.0112	0.241308
Mtpap	18:4373668-4397330	8.45446	4.9866	-0.761656	1.56563	0.0122	0.252588
Acvr2b	9:119402443-119433501	2.27033	1.3391	-0.761635	0.967423	0.09815	0.608049
Gm17149	8:18595130-18803189	7.2974	4.30492	-0.761396	0.506006	0.3883	0.869405
Ep400	5:110664372-110770717	9.71298	5.73045	-0.761267	0.442522	0.23255	0.774725
0610040B10Rik	5:143316488-143332704	4.88365	2.88347	-0.760152	0.334427	0.7577	0.973651
2210404O09Rik	17:21879569-21909926	1.84837	1.09192	-0.759381	0.688659	0.2383	0.778748
Rps12-ps19	11:74898070-75164448	20.4476	12.0849	-0.758724	0.201732	0.70985	0.966329
Rbm6-ps1	1:17397411-17400281	2.75087	1.62619	-0.758392	1.28661	0.0312	0.395347
Jade1	3:41555730-41616864	12.5393	7.41797	-0.757356	1.10506	0.00745	0.195394
Adh4	3:138415465-138430892	39.7516	23.5227	-0.756959	1.26395	0.013	0.260918
Gm14897	X:114857886-114858093	26.5565	15.716	-0.756835	1.05035	0.32575	0.835535
Anapc1	2:128610103-128687391	9.1011	5.38668	-0.756644	0.630739	0.25505	0.79072
Plk2	13:110395043-110400844	3.34252	1.97935	-0.75591	1.26349	0.04245	0.449772
Otud1	2:19657751-19660583	3.97307	2.35295	-0.755785	1.24925	0.0396	0.43733
Cep83	10:94688789-94790336	2.99031	1.77224	-0.75472	1.33299	0.0519	0.486865
Wapal	14:34673927-34747983	11.4896	6.81016	-0.754563	1.01866	0.05315	0.491149
Cnot6	11:49671502-49712723	5.31912	3.15303	-0.754449	0.731828	0.22665	0.770224
Zfp944	17:22337988-22361400	3.92193	2.32487	-0.754414	1.4452	0.03435	0.412487
Cdkn2c	4:109660875-109667189	10.9505	6.49245	-0.754168	1.21347	0.04115	0.44449
RP24-84B18.1	1:194819729-194820087	4.08454	2.42364	-0.752995	0.591568	0.27635	0.804301
RP24-363G13.1	3:86786150-86920852	3.769	2.23805	-0.751938	0.517098	0.32475	0.834987
Dpt	1:164796643-164936775	2.46784	1.46582	-0.751536	0.964692	0.087	0.586109
Mycbp	4:123898632-123917269	10.7145	6.3655	-0.75122	0.847002	0.0684	0.538887
2900093K20Rik	2:163405821-163424697	6.55223	3.8935	-0.750918	0.314133	0.7181	0.967719
Exoc6	19:37550417-37683245	4.02507	2.3936	-0.749835	1.39354	0.0252	0.35995
Rbm7	9:48488708-48495330	37.0809	22.056	-0.749507	1.60586	0.01025	0.230765
Gm16061	5:135670032-135735326	14.1738	8.43601	-0.748595	0.115867	0.61815	0.947087
Ankrd12	17:65967500-66077089	2.22744	1.32581	-0.748508	0.560513	0.17215	0.717066
Otud4	8:79639617-79677724	2.94833	1.75492	-0.748492	1.11637	0.0178	0.305513
Frg1	8:41397456-41417118	6.55291	3.90144	-0.748128	1.17999	0.0594	0.511799
Gm9242	16:97471049-97504936	7.47451	4.4511	-0.747818	1.2534	0.0394	0.43631
Gm20432	5:25271797-25498783	13.611	8.10793	-0.747364	0.206021	0.7612	0.974168
Rpl36a-ps1	14:98993979-98994300	65.5834	39.0722	-0.747187	1.20314	0.04335	0.45343
Gpbp1l1	4:116557657-116600266	20.8465	12.4216	-0.74695	0.598991	0.2895	0.812418
Slc17a4	13:23897737-23915007	12.2296	7.28775	-0.746829	1.48873	0.01385	0.269123
Gm6177	1:160893119-160893584	7.35739	4.38581	-0.74635	0.761827	0.18355	0.729419
Mnd1	3:84087932-84155786	4.69073	2.79688	-0.745994	1.01258	0.1059	0.623192
Rbm12b2	4:12027504-12096243	1.86665	1.11409	-0.744584	0.96585	0.1066	0.624511
Nmnat3	9:98287434-98420438	5.41614	3.23332	-0.744248	0.840146	0.1076	0.626763
Rnf128	X:139563315-139673145	63.5939	37.9666	-0.74416	1.60568	0.0069	0.187459
Sh3bgrl3	4:134102569-134128789	111.714	66.6993	-0.744063	1.27232	0.03095	0.393907
Gm6132	13:70004049-70028348	11.1919	6.68256	-0.743975	0.879015	0.12355	0.652413
Gigyf1	5:137483019-137540718	7.9452	4.74418	-0.743925	0.579465	0.32005	0.832134
Ehbp1	11:22005827-22342292	2.26042	1.35076	-0.742811	1.04766	0.03145	0.396668
Wdr62	7:30240137-30290237	2.44393	1.46053	-0.742707	0.437107	0.45125	0.897733
Sparcl1	5:104079110-104119687	2.60573	1.55734	-0.742603	1.25982	0.04	0.439339
Tbpl1	10:22645010-22731938	13.8579	8.28291	-0.7425	0.629254	0.29975	0.818904
Gm24888	7:109519146-109522367	13.6042	8.13176	-0.74241	0.658439	0.74185	0.971281
Gm21378	13:120099348-120100332	3.73918	2.23515	-0.742349	0.921457	0.11795	0.644002
Gm6222	X:103697413-103821965	52.4001	31.3334	-0.741866	0.31787	0.72075	0.968274
Pspc1	14:56722440-56778316	2.93181	1.75399	-0.741152	1.05935	0.0466	0.467217
Zfp85	13:67729261-67756838	1.67917	1.00571	-0.739543	1.01734	0.1433	0.681816
5730508B09Rik	3:127869687-127896323	3.38879	2.03047	-0.738956	1.21805	0.05705	0.503887
Rrn3	16:13780698-13814840	3.8095	2.28275	-0.738827	2.11233	0.02165	0.334956
Gm9387	3:128953781-128955098	2.96011	1.77392	-0.738708	0.988222	0.12295	0.651793
Gm4987	X:46455886-46456294	3.67934	2.20522	-0.738524	0.607349	0.2671	0.798199
E2f5	3:14578640-14611285	3.53898	2.12146	-0.738279	0.832768	0.15425	0.696718
Gm12176	11:46896252-47988969	5.02388	3.01295	-0.737627	0.91904	0.11505	0.639456
Gm29216	1:24615705-24616197	26731.3	16032.4	-0.737538	0.89328	0.1083	0.627828
1110028F11Rik	11:87662721-87735539	3.95525	2.37282	-0.737165	0.244283	0.6906	0.962979
Fam50a	X:74313032-74320149	10.6309	6.37838	-0.737004	1.09819	0.03745	0.427312
Osbpl5	7:143688761-143756985	3.96595	2.37951	-0.736999	0.609113	0.25275	0.789064
Eef1e1	13:38645697-38659028	7.91192	4.74794	-0.736727	1.23539	0.04605	0.465169
Abhd10	16:45729724-45742955	4.61856	2.77165	-0.736697	0.809532	0.1574	0.700462
Lsm8	6:18848578-18855751	9.2448	5.54813	-0.73664	0.943405	0.1006	0.612696
Tram1	1:13564697-13589910	23.9931	14.4014	-0.736411	2.0466	0.0094	0.220597
Gm9396	3:130068411-130068978	126.245	75.7891	-0.736158	1.45872	0.01095	0.238932
Rufy3	5:88583573-88642671	2.68957	1.61468	-0.73613	1.25971	0.02975	0.387555
Gm11805	4:3678114-3813122	2.03013	1.21923	-0.735601	0.271842	0.75545	0.97327
C1galt1	6:7844841-7872047	6.39495	3.84181	-0.735147	1.35606	0.0258	0.364014
Cxcl10	5:92331826-92414628	13.7774	8.28129	-0.734371	0.879485	0.1181	0.644056
Gm15432	X:29564013-29564208	23.0441	13.8589	-0.733584	0.612665	0.32015	0.832208
Rps19-ps3	4:147821776-147822202	214.802	129.223	-0.733141	1.46602	0.0118	0.24825
Gm13641	2:71271062-71367749	1.73782	1.04571	-0.732799	0.217625	0.78845	0.977664
BC023829	X:70459752-70477180	16.0002	9.63122	-0.732299	1.43766	0.0091	0.217125
Rpl21-ps14	8:4861168-4861651	6.07625	3.65911	-0.731687	0.778816	0.1738	0.718781
Utp23	15:51877428-51884614	5.54967	3.34281	-0.731339	0.724929	0.2227	0.766671
Ttpa	4:20007937-20030785	208.122	125.428	-0.730574	1.55272	0.02085	0.329612
Sirt5	13:43370709-43395202	8.43935	5.08815	-0.729991	1.19776	0.04005	0.439551
Hdac8	X:102252521-102505359	2.31963	1.39861	-0.729904	0.692405	0.1885	0.734434
Alb	5:90460888-90476603	56554.9	34111.5	-0.729395	0.492399	0.3779	0.864319
Scarf1	11:75513539-75526582	10.3691	6.25457	-0.729308	1.53656	0.0232	0.346023
Gm10167	5:147957319-148316065	28.1933	17.0073	-0.729197	1.57627	0.0191	0.315854
A930005H10Rik	3:115881580-115934361	31.3225	18.8973	-0.729024	0.827041	0.17715	0.72251
Gm12013	11:17095489-17095644	773.302	466.545	-0.729015	1.19776	0.0342	0.411906
Lage3	X:74351275-74353618	38.3738	23.1522	-0.728977	1.34112	0.02245	0.340686
Scamp1	13:94201309-94285857	11.6627	7.03657	-0.72896	1.50803	0.01015	0.229331
Gtf2a2	9:70012549-70022866	33.6574	20.3126	-0.72855	1.29276	0.0385	0.431888
Gm12335	11:74898070-75164448	5.88038	3.54905	-0.728476	0.0899316	0.63065	0.950048
Ap3s1-ps1	X:38685591-38686170	23.375	14.1086	-0.728392	1.20149	0.03925	0.435374
Tm2d1	4:98355369-98383306	19.4079	11.7192	-0.727766	1.10618	0.082	0.574946
Nae1	8:104511027-104534637	11.7727	7.11001	-0.727525	0.843065	0.166	0.710466
Gm11225	4:70047156-70048205	34.24	20.6793	-0.727498	1.44963	0.0172	0.300177
Erich1	8:14027564-14090327	2.05456	1.2413	-0.726976	0.946952	0.13455	0.669134
Gm28046,Rdh1,Rdh9	10:127759720-127792697	110.934	67.0597	-0.726178	1.21996	0.031	0.394153
Rpp21	17:36255644-36258069	48.4006	29.2611	-0.726043	1.11364	0.06175	0.519402
Abcg5	17:84658233-84700333	81.886	49.5695	-0.724165	0.856555	0.1349	0.669686
RP23-174P13.1	3:59729789-59752333	25.2293	15.2744	-0.723988	0.627834	0.5373	0.92605
Gm16056	5:26817202-27727505	72.5217	43.9284	-0.723258	0.891439	0.41375	0.881627
Ap3s1	18:46741916-46790826	10.5183	6.37306	-0.722841	1.31185	0.03425	0.412003
Kdm6a	X:18162574-18279936	2.45351	1.48674	-0.722692	1.10266	0.1538	0.696213
Dcun1d5	9:7184565-7207031	10.5082	6.36968	-0.722223	1.27814	0.0343	0.412311
Cry2	2:92403645-92434043	10.9711	6.6535	-0.72152	1.3275	0.01355	0.266419
Ociad2	5:73322198-73338947	11.8982	7.22053	-0.72057	1.19154	0.04185	0.447666
Tagap1	17:6954964-6961156	3.00429	1.82336	-0.720426	1.93883	0.04275	0.451015
Alkbh2	5:114123925-114128218	11.4068	6.92959	-0.719059	1.19625	0.0407	0.442554
Dmxl2	9:54365157-54501760	4.44849	2.70373	-0.718368	0.771242	0.0948	0.601247
Gm21092	8:20550330-20581999	4.44884	2.70429	-0.71818	1.40147	0.0374	0.427225
Rpl21-ps6	17:55915402-55915870	20.3849	12.393	-0.717979	1.04501	0.06335	0.524631
Mup-ps5	4:60597596-60597695	33.2415	20.2093	-0.717965	7.36392	0.67755	0.960676
Zfp560	9:20345135-20385177	10.6634	6.48359	-0.717805	0.85903	0.14405	0.682943
Gm10059	5:33739672-33782817	54.6325	33.243	-0.716707	0.164567	0.7113	0.96659
Serpina1e	12:103946930-103958975	1219.66	742.203	-0.716588	1.13941	0.05285	0.490212
Cd9-ps	7:41666516-41727193	4.15807	2.53085	-0.716292	0.427205	0.43055	0.889475
Cdk1	10:69336634-69352938	3.00574	1.8302	-0.715718	0.450343	0.3626	0.856267
Lrrc51	7:101881324-101933895	5.06142	3.08219	-0.715586	0.366226	0.56245	0.93337
C1s2	6:124624624-124636085	9.5108	5.79307	-0.71524	1.42421	0.02075	0.328868
Gm12444	4:46243013-46243890	4.75339	2.89564	-0.715072	1.01142	0.0872	0.586481
Vrk2	11:26386134-26593999	2.324	1.41596	-0.71483	0.439815	0.2754	0.803824
Ppat	5:76913248-76967509	6.40177	3.90301	-0.713884	0.388506	0.55715	0.931865
Gm6457	18:14570100-14570915	11.29	6.88489	-0.71354	1.16184	0.05135	0.48456
Plac8	5:100553724-100572245	6.77746	4.13367	-0.71332	0.741922	0.2205	0.764834
4931406C07Rik	9:15283336-15312104	85.8645	52.3805	-0.713032	1.52305	0.02235	0.339833
Gm12397	4:40912740-40913355	3.20889	1.95783	-0.71282	0.722737	0.2418	0.78149
Ctdsp2	10:126978716-126999975	43.4185	26.4937	-0.712659	0.990351	0.03635	0.422535
Limd2	11:106156255-106161158	17.1999	10.4964	-0.7125	0.7907	0.16035	0.703658
Pstk	7:130162450-133124354	20.2964	12.3866	-0.712445	0.0473657	0.4486	0.896672
Kdm1a	4:136469760-136602723	7.36059	4.49244	-0.712323	0.592482	0.30535	0.823004
Gm9800	14:8799588-8800504	93.9108	57.3234	-0.712167	1.64286	0.0115	0.244897
Rps2-ps9	17:27751231-27820558	13.7706	8.40733	-0.711867	0.148923	0.6734	0.960093
Casd1	6:4600839-4643381	5.25806	3.21169	-0.711198	1.52769	0.0627	0.522476
Gm10275	10:29698745-29699380	377.88	230.892	-0.71071	1.36363	0.02	0.322914
Gm15793	1:66830838-66863277	123.278	75.3367	-0.71049	0.392027	0.48065	0.907756
Rdh11	12:79174336-79192293	18.5243	11.3209	-0.710428	1.18576	0.04465	0.45923
Pold3	7:100082110-100121565	4.54347	2.77702	-0.710257	0.444268	0.18905	0.735001
Rpl28-ps3	4:126058564-126092195	178.277	108.997	-0.709828	1.3977	0.01555	0.28519
E2f3	13:29906574-29985668	4.1744	2.55253	-0.709642	0.879895	0.2301	0.772975
Vapa	17:65580055-65613555	38.1505	23.3303	-0.709498	1.53195	0.01185	0.248853
Gm5801	14:56010535-56011315	31.8284	19.4673	-0.709262	1.34781	0.02205	0.337891
Ptges3	10:128058953-128077272	27.6096	16.8881	-0.709164	1.50815	0.01575	0.286839
Tyw5	1:57388236-57417953	15.7054	9.6078	-0.708981	0.475611	0.3957	0.873039
Zeb1	18:5491502-5775467	3.85291	2.35734	-0.708788	1.20657	0.01265	0.257063
Ttc4	4:106662255-106678944	39.7005	24.2911	-0.708731	0.973065	0.09835	0.608358
Ints6	14:62663666-62830126	2.80826	1.71867	-0.708385	1.22899	0.0365	0.423262
Phc3	3:30899370-30969415	2.12098	1.29826	-0.708155	1.22704	0.0174	0.301929
Pdzk1ip1	4:115088707-115093899	4.44334	2.72097	-0.707522	0.696098	0.2016	0.747614
Slc50a1	3:89268245-89270570	9.50308	5.82153	-0.706996	1.0406	0.06635	0.532875
Gm14539	X:20581140-20581314	2218.52	1359.24	-0.706793	1.37451	0.0194	0.318329
Gm6483	8:19682267-19698275	2.69399	1.6507	-0.706668	0.972889	0.0749	0.557232
Mettl9	7:121033251-121076834	28.7984	17.6498	-0.706343	1.36896	0.0261	0.365823
BC021891	8:125910449-125947439	2.46869	1.51322	-0.706126	1.29335	0.02705	0.371674
Fyttd1	16:32821702-32908963	9.94292	6.09631	-0.705733	0.554929	0.1769	0.722368
Rps12-ps14	X:125857682-125858081	19.8706	12.1882	-0.705147	0.953621	0.08975	0.59139
Gm12020	11:18325629-18327671	3.82289	2.34617	-0.704356	1.15877	0.04865	0.475254
Nudcd1	15:44375226-44437685	3.44152	2.11227	-0.704251	0.689184	0.23935	0.77952
Mib1	18:10725547-10818704	8.29226	5.0909	-0.703845	1.17463	0.04185	0.447666
Rps25	9:44407713-44418003	213.591	131.173	-0.703379	1.36096	0.02225	0.339198
Gm14648	X:47900344-47900827	47.1208	28.9388	-0.703357	1.26778	0.0288	0.382097
Taf4a	2:179912145-179979013	4.43054	2.72123	-0.703226	1.0682	0.0596	0.512385
Arid4a	12:71015989-71098592	3.15174	1.93599	-0.703075	1.03269	0.06395	0.526047
BC027231	16:44724300-44746363	3.76356	2.31292	-0.702385	0.760804	0.16225	0.706176
Tmx3	18:90510153-90543267	2.65675	1.63288	-0.702249	1.2372	0.04015	0.440078
Rpp30	19:36083715-36104772	3.94405	2.42464	-0.70191	1.19824	0.0897	0.591374
Gm6900	7:10656478-10656820	84.0565	51.6781	-0.701805	1.21106	0.0429	0.451638
A130014A01Rik	8:119910359-124345724	1.62945	1.00183	-0.701745	0.0319152	0.61105	0.945286
Sltm	9:70542919-70592237	8.02541	4.93459	-0.701644	1.42387	0.0183	0.309673
Arrdc3	13:80883383-80896035	47.9317	29.5082	-0.699866	0.529156	0.22685	0.770447
Smad7	18:75367528-75395935	9.5938	5.9075	-0.699554	0.939729	0.1241	0.653179
Urah	7:140835017-140846769	701.802	432.198	-0.699371	1.31386	0.0306	0.392144
Tuba8	6:121210733-121226854	4.38661	2.70287	-0.698611	0.989836	0.09965	0.610853
Ypel5	17:72836703-72851195	19.8147	12.2096	-0.69855	1.45316	0.01965	0.320372
Masp1	16:23451784-23520590	7.78647	4.79984	-0.697983	1.87738	0.01955	0.319594
Sirt1	10:63319004-63381704	3.80799	2.34916	-0.696886	1.1211	0.0327	0.403449
Mup-ps19	4:61957148-61959911	18.5114	11.4246	-0.696268	1.05943	0.07185	0.54867
mt-Nd2	MT:3913-5016	17163.5	10594	-0.696099	0.190085	0.1241	0.653179
mt-Co1	MT:5327-6938	22279	13756	-0.695622	0.676283	0.2422	0.78165
Gm10307	1:31615148-31616661	24.7151	15.2769	-0.694038	1.13783	0.04295	0.451884
Gm12978,Gm12992	4:131873616-131920029	1.92303	1.18888	-0.69377	0.140681	0.6696	0.959266
Suclg2	6:95474133-95718837	105.32	65.1189	-0.693631	1.56879	0.01995	0.322526
RP23-310C14.2	1:141356788-141357277	2.83234	1.75189	-0.693079	0.643866	0.30645	0.823791
Klf6	13:5861488-5870393	4.07528	2.52087	-0.692977	1.33621	0.02835	0.379477
Aptx	4:40682381-40703194	14.4983	8.9689	-0.692882	1.13654	0.04725	0.469904
RP23-302C16.5	1:136789181-136789520	27.592	17.0761	-0.692271	0.971783	0.1018	0.615229
Kmt2a	9:44803354-44881296	3.37064	2.08612	-0.692199	0.909124	0.07965	0.569373
Cspp1	1:10024600-10136768	14.5182	8.98747	-0.691873	0.433519	0.4316	0.889981
Kansl1l	1:66700830-66817562	2.88092	1.78362	-0.691722	0.619948	0.25795	0.792013
Ebpl	14:61339762-61360445	45.7361	28.3208	-0.691473	1.47185	0.01995	0.322526
Rictor	15:6708380-6800398	2.09463	1.29713	-0.69137	1.22173	0.02995	0.388801
Zfp119a	17:55864891-55878930	1.6796	1.04031	-0.691109	0.932861	0.1179	0.643955
Car3	3:14863511-14872523	1329.02	823.284	-0.690897	1.06024	0.0615	0.518458
Fmnl2	2:52857859-53134202	1.83405	1.13631	-0.690672	0.895608	0.0958	0.603237
Rpl21-ps11	3:96666514-96666982	82.5595	51.1936	-0.68947	1.30838	0.02285	0.343567
Aida	1:183276351-183325476	6.10408	3.78653	-0.688897	0.618685	0.3229	0.83382
Keg1	19:12695785-12721247	18.2081	11.3011	-0.68812	1.31472	0.02155	0.334715
Anapc15-ps	10:95672990-95673451	6.74555	4.18687	-0.688065	0.777649	0.19495	0.741154
Gm12090	11:29545845-29578367	2.46231	1.52881	-0.687608	0.289627	0.68295	0.961945
Fgfr1op	17:8165500-8196804	4.77788	2.96674	-0.687492	1.21453	0.03195	0.399084
Gm15766	6:147271836-147272649	4.55712	2.82978	-0.687435	0.758908	0.1662	0.710523
Rilp	11:75510093-75513168	43.7101	27.1643	-0.686254	1.62819	0.016	0.288964
Ddx6	9:44604891-44640731	15.0915	9.38046	-0.686006	1.45572	0.0148	0.278268
Cpsf3	12:21286296-21315056	20.795	12.9271	-0.685837	1.53863	0.0179	0.30641
Gm5398	X:77289831-77290815	7.6568	4.76322	-0.684806	1.05255	0.07085	0.545978
2210418O10Rik	2:176226568-176240328	2.68823	1.67333	-0.683934	0.626851	0.1866	0.732718
Gm11663	11:104550662-104595753	17.0759	10.6313	-0.683639	0.561718	0.3729	0.861849
Rpl21-ps12	6:90844977-90845460	19.4185	12.0919	-0.68339	1.01496	0.0823	0.575576
Gar1	3:129824911-129831396	16.5339	10.3099	-0.681406	0.922	0.1153	0.639777
Ocln	13:100496506-100552718	6.97746	4.3519	-0.681057	1.14741	0.0401	0.439854
Gm5778	10:73099341-74649737	10.8738	6.78522	-0.680391	1.13799	0.0469	0.468524
Snrnp48	13:38204938-38227663	9.21235	5.7487	-0.680334	1.07731	0.0731	0.551906
Pcsk4	10:80321282-80329498	38.3482	23.9411	-0.679669	1.2127	0.03795	0.429459
Swap70	7:110221702-110283503	2.0398	1.27378	-0.679313	1.09025	0.0525	0.488888
Rad21	15:51962604-51991760	11.2927	7.05205	-0.679278	1.37124	0.01625	0.291333
Gm12091	11:29601783-29602613	61.1775	38.2082	-0.679121	1.34168	0.02005	0.323259
Fbxl3	14:103080238-103099566	10.9501	6.84095	-0.678682	0.915905	0.08755	0.587287
Zfp330	8:82763620-82774160	7.11559	4.44538	-0.678676	1.19343	0.06025	0.514743
Atf3	1:191170295-191218039	2.15379	1.34564	-0.67858	0.625973	0.192	0.738301
Gm15362	X:74504014-74504402	4.20025	2.62605	-0.677578	0.664938	0.35865	0.853983
Eif3a	19:60761115-60790693	25.7161	16.0817	-0.677249	1.42782	0.01925	0.317152
Gm13082	4:143671123-143671684	7.74199	4.84322	-0.676738	0.828363	0.16325	0.707257
Chn1os3	2:73596525-73775346	2.31879	1.45233	-0.675006	0.627111	0.3744	0.862459
Gsta2	9:78331017-78355788	24.7713	15.5172	-0.674795	0.987688	0.0828	0.576703
Ascc3	10:50592668-50851202	2.62063	1.64171	-0.674708	1.33501	0.02715	0.372143
Naa15	3:51415147-51476507	4.1311	2.58819	-0.674581	0.82587	0.1323	0.665744
Pign	1:105382259-105663677	2.66704	1.67103	-0.674501	0.30806	0.2646	0.796302
Gm15790	1:129273301-130219278	10.9272	6.84662	-0.674466	0.412388	0.45905	0.900361
Car8	4:8143361-8239041	17.8052	11.1601	-0.673946	1.48041	0.02145	0.333844
Rpp14	14:8080366-8091834	16.8531	10.5676	-0.673375	0.812965	0.1637	0.707742
Lpp	16:24391611-24992576	4.60013	2.88519	-0.67301	1.14102	0.06555	0.5306
Ankrd24	10:81628539-81647610	5.58146	3.50217	-0.672393	0.588385	0.18175	0.727393
Hsf2	10:57486384-57513133	10.46	6.56341	-0.672367	1.27065	0.03005	0.389367
Frat1	19:41830167-41830809	2.91616	1.83174	-0.670858	0.640042	0.30665	0.823978
Gm5578	6:112605543-112606779	6.87007	4.31647	-0.670472	1.06525	0.06835	0.538801
Rps12-ps13	X:125674832-125675231	19.5981	12.3159	-0.670195	0.915887	0.10405	0.619396
Cwc15	9:14500616-14510577	79.5074	49.9679	-0.670088	1.54795	0.01945	0.318855
Gm15495	7:25442151-25443463	1.86983	1.17515	-0.670056	0.748412	0.20465	0.750708
Aktip	8:91070056-91134465	4.56383	2.87036	-0.669012	0.489093	0.364	0.857107
Eea1	10:95940662-96045518	4.59521	2.89099	-0.66857	1.3524	0.0204	0.326305
Gm10923	15:85064690-85131957	1.79863	1.13175	-0.668347	0.279765	0.5372	0.926001
Csnk2a2	8:95446095-95488820	3.17225	1.99607	-0.66834	1.16288	0.0463	0.465964
4930430F08Rik	10:100488288-100589259	2.2702	1.42956	-0.667243	1.14625	0.10845	0.628121
Mzt1	14:99034543-99046136	6.7539	4.25307	-0.667217	1.16188	0.0431	0.452453
Tob1	11:94211453-94215495	64.1403	40.3935	-0.667108	1.28408	0.02535	0.361055
Slc6a6	6:91684066-91759063	19.6795	12.3966	-0.666746	1.29626	0.0286	0.380936
Fam210a	18:68260186-68300333	12.0463	7.58829	-0.666741	0.568457	0.17185	0.716898
Mrpl47	3:32706297-32751566	13.1537	8.28625	-0.666679	0.315288	0.56105	0.933074
Wwox	8:114439654-115352708	5.76071	3.63035	-0.666137	0.836599	0.1514	0.693434
Apba3	10:81268171-81291267	90.1857	56.8497	-0.665746	1.51534	0.06645	0.533103
Gm17782	17:36141757-36163176	4.12995	2.60355	-0.665646	0.74393	0.229	0.772064
Ccdc61	7:18890882-18910415	3.5744	2.25344	-0.665569	0.889486	0.1053	0.621772
Gm14056	2:136399061-136399703	17.3481	10.9418	-0.664923	1.03451	0.0659	0.531459
Gm15883	7:27119908-27133660	2.0169	1.27294	-0.663978	0.0791073	0.7027	0.965155
Pin4	X:102119446-102127669	4.64198	2.93048	-0.663604	0.654676	0.2333	0.775166
Micu2	14:57916279-57999262	16.1795	10.2145	-0.663546	1.27133	0.02535	0.361055
Gm10163	9:88376749-88482574	65.909	41.6147	-0.663383	0.727324	0.23005	0.772919
Ddx46	13:55635026-55681256	7.68663	4.85439	-0.663062	1.39398	0.0202	0.324596
Ube2e3	2:78868123-78921293	32.671	20.6397	-0.66259	0.826543	0.15275	0.695071
Nup43	10:7629372-7681136	4.3189	2.72974	-0.661899	0.31191	0.5644	0.933966
Klhl24	16:20097553-20127744	6.45839	4.0841	-0.661157	1.33602	0.02115	0.331849
Ttll4	1:74661744-74703730	6.867	4.34314	-0.660941	0.583854	0.1661	0.710472
Rbm47	5:66016548-66191335	13.9084	8.80027	-0.660337	1.47402	0.03155	0.39727
Gm15536	10:6740628-7052478	2008.85	1271.93	-0.65935	1.03181	0.08875	0.589438
Gm20746,Gm26445	10:130592135-130592705	625.327	396.02	-0.65904	0.334829	0.5367	0.925819
Mtx3	13:92844786-92858230	3.48374	2.20747	-0.658245	1.1451	0.0472	0.46977
Zfp119b	17:55938380-55949500	2.22688	1.41112	-0.658182	0.978604	0.1309	0.663772
3110002H16Rik	18:12168716-12236400	20.2545	12.8368	-0.657955	0.261365	0.46615	0.903047
Gm9081	10:122169372-122170363	2.49828	1.58362	-0.65771	0.684784	0.23295	0.77495
Ccdc115	1:34436669-34449356	8.68804	5.5085	-0.657372	0.5876	0.30375	0.821933
Arfgap3	15:83299739-83350247	2.6588	1.68773	-0.655689	1.01028	0.08395	0.57974
Mgam	6:40628830-40769123	5.95739	3.78244	-0.655363	1.32249	0.02755	0.374513
Vprbp	9:106821873-107231909	13.552	8.60978	-0.654452	0.185244	0.55835	0.932266
Akap11	14:78492245-78536860	3.17815	2.01954	-0.654161	1.63535	0.02445	0.354716
Lactb	9:66955392-66975484	32.3884	20.5847	-0.653908	1.41478	0.01775	0.30516
Cd63	10:128908918-128912816	5.30598	3.37229	-0.653892	0.89102	0.146	0.685802
Gm8893	12:103728155-103830373	1020.54	648.85	-0.653368	0.143804	0.68145	0.961507
Gm7809	17:21962551-22071168	3.55461	2.26039	-0.653116	0.467111	0.4401	0.893396
Dut	2:125247189-125258608	5.58822	3.55483	-0.652606	0.92915	0.11685	0.642059
Rdh10	1:16105773-16133734	9.68035	6.15811	-0.652572	1.29275	0.03125	0.395578
Dynlt1b	17:6310546-6493180	7.71124	4.90658	-0.652247	0.817348	0.24535	0.783982
Nmrk1	19:18631949-18652194	19.0336	12.1136	-0.65192	1.11247	0.06005	0.514
Narf	11:121237252-121255856	12.9184	8.22506	-0.651325	0.996334	0.0228	0.343217
Lama5	2:180176372-180225859	1.80118	1.14682	-0.651301	0.374507	0.54575	0.928686
Cdkn1c	7:143458349-143461050	4.06829	2.59241	-0.65013	0.94951	0.0968	0.605351
Qk	17:10206470-10319361	9.83922	6.27026	-0.650019	1.29606	0.03445	0.412996
RP24-286C21.2	1:184610279-184629473	14.226	9.06653	-0.649911	0.907175	0.11325	0.636015
Lss	10:76531587-76562226	14.04	8.94857	-0.649814	0.386979	0.34855	0.84863
Jarid2	13:44729473-44921643	1.70306	1.08577	-0.649401	0.556722	0.06575	0.531112
Hebp1	6:135137518-135168215	266.858	170.136	-0.649384	1.26466	0.03395	0.410581
Serp1	3:58521968-58557501	74.2558	47.3502	-0.649133	1.21583	0.04575	0.464126
Rnf38	4:44126209-44233789	2.54656	1.62447	-0.648576	0.411706	0.19475	0.741068
Gm16536	9:45838579-45936058	11.3717	7.25447	-0.648505	0.412592	0.50295	0.915209
Gm12344	11:77089914-77188968	14.0528	8.9682	-0.647973	0.362305	0.5107	0.917946
Hdac11	6:91156664-91174692	36.3218	23.1799	-0.647958	1.32881	0.0179	0.30641
Gm7860	16:91539181-91540060	7.36592	4.70117	-0.647846	0.964133	0.09765	0.607111
Smarcad1	6:65042666-65116050	1.78016	1.13645	-0.647474	1.06622	0.0734	0.552771
Gm15528	13:75869536-75943925	2.0449	1.30578	-0.647117	0.388205	0.5131	0.918562
Zfp579	7:4983482-4996158	13.7024	8.74983	-0.647099	0.964381	0.14425	0.683274
Mapk12	15:89130584-89140703	2.39858	1.53238	-0.646405	0.916976	0.1277	0.658813
Fuom	7:140093394-140102441	62.4767	39.9341	-0.645697	0.968001	0.0866	0.585043
Ppp1r21	17:88530117-88588367	19.9497	12.7567	-0.645111	0.753535	0.15605	0.698524
Ccnl1	3:65946150-65962036	22.074	14.1161	-0.645006	0.678456	0.1893	0.73536
Ptpn2	18:67665510-67724595	5.95704	3.80959	-0.644959	1.04128	0.0807	0.571953
Cks2	13:51645231-51650660	10.2998	6.58832	-0.644638	0.952739	0.1015	0.614642
Abcd2	15:91145883-91191807	27.0917	17.3293	-0.644633	1.29859	0.02765	0.375119
Gm5513	19:14959548-14960766	3.67979	2.35393	-0.644552	0.935016	0.13085	0.66369
Atp1b1	1:164289799-164458355	40.4561	25.9033	-0.643225	1.00347	0.053	0.490797
Pcbp2	15:102455525-102517064	250.463	160.373	-0.643167	0.247614	0.50125	0.914715
Acaca	11:84129671-84401651	5.31288	3.40207	-0.643079	0.724284	0.0541	0.494314
Prmt1	7:44975988-44986492	11.5281	7.3851	-0.64247	0.916971	0.0843	0.580383
Rock1	18:10064400-10181792	3.00257	1.92355	-0.642424	1.1815	0.0466	0.467217
Wwtr1	3:57455648-57575910	3.98206	2.55142	-0.642218	1.24787	0.0444	0.458189
B3galnt2	13:13954673-14039638	7.03061	4.50471	-0.642217	1.05285	0.10195	0.615457
Snora73b	4:132331918-132353686	23.3332	14.9529	-0.64196	0.273116	0.72715	0.969236
Sel1l3	5:53107083-53213452	2.64002	1.69277	-0.641164	1.40748	0.051	0.483583
Cyp3a57	5:145345278-145390512	7.91225	5.07352	-0.6411	1.18183	0.06085	0.516671
Dnttip2	3:122245556-122293547	7.52155	4.8258	-0.640264	0.290943	0.73495	0.970164
Fam98b	2:117249738-117271540	4.8923	3.1391	-0.640162	1.0046	0.07245	0.550376
5830428H23Rik	19:60889748-61140840	18.098	11.6209	-0.639106	0.801006	0.2254	0.769125
Gm13359	2:26722386-26723081	3.06161	1.96603	-0.639003	0.6759	0.2636	0.79576
Gm12988	4:135756217-135756695	34.8125	22.3603	-0.638664	1.0832	0.05825	0.507819
Gm12728	4:105789868-105794711	4.62047	2.96805	-0.638524	0.625079	0.2816	0.807405
Tpd52l1	10:31332379-31445921	12.4168	7.97781	-0.638226	1.19189	0.0481	0.473343
Heatr3	8:88137854-88172027	10.4312	6.7022	-0.638199	0.971535	0.06095	0.517073
Mvk	5:114444268-114460591	14.8053	9.51408	-0.637979	0.820069	0.1208	0.648429
P4ha1	10:59323295-59373304	2.85845	1.83702	-0.637871	1.23011	0.06945	0.541902
Gm6168	7:13846160-13847616	2.89784	1.86256	-0.637689	0.501603	0.38635	0.868419
Gm8615	5:149119564-149184063	7.69247	4.94502	-0.637471	0.853263	0.15725	0.700371
Gm13268	2:14603087-14987908	29.5933	19.0297	-0.637014	0.699124	0.21225	0.757742
Rpsa-ps3	11:22386291-22388196	3.33915	2.14768	-0.636699	0.770328	0.19235	0.738624
Gm6428	1:36548638-36683183	5.67501	3.6527	-0.63566	0.277251	0.65755	0.956478
Rps12-ps15	X:124973549-124973948	20.8036	13.3909	-0.635581	0.880732	0.12805	0.65925
0610007P14Rik	12:85815447-85824550	63.5931	40.9338	-0.635575	1.3446	0.0579	0.506664
Gsta3	1:21240588-21271593	539.673	347.468	-0.635207	1.03261	0.074	0.554332
Alcam	16:52248995-52454074	6.8535	4.41573	-0.63419	0.735134	0.04365	0.454984
Ribc1	X:152004581-152016295	1.68581	1.08621	-0.63414	0.633707	0.2612	0.793956
Kif16b	2:142617473-142901531	2.10628	1.35721	-0.634049	1.02146	0.085	0.581656
Ube2c	2:164769897-164779967	2.30104	1.48281	-0.633955	0.279759	0.4041	0.876877
Sec61g	11:16500529-16508484	29.3307	18.9015	-0.633911	0.912202	0.11295	0.635432
Gm18025	12:34290273-34291092	18.9187	12.1919	-0.633894	1.09964	0.0621	0.520631
Cat	2:103453848-103485160	1055.66	680.43	-0.633622	0.946672	0.1269	0.657717
Akr1d1	6:37530172-37568815	52.3743	33.7806	-0.632664	0.831705	0.0469	0.468524
Cobll1	2:65088338-65239675	13.2835	8.56942	-0.63236	1.18742	0.02375	0.349872
Tmem50a	4:134897848-134915024	91.6198	59.1078	-0.632311	1.4322	0.03125	0.395578
Commd10	18:46958861-47087992	4.74924	3.06475	-0.631929	0.974175	0.0905	0.593165
Zmym5	14:56790584-56811716	8.82045	5.69503	-0.631149	1.23126	0.04015	0.440078
Ccdc23	4:119195305-119201298	23.6854	15.2931	-0.631118	1.10934	0.05845	0.508492
Gm7729	18:27598643-27599756	10.459	6.75389	-0.630959	1.01347	0.09715	0.606035
Rpsa-ps11	4:59162267-59163156	38.5875	24.9205	-0.630801	1.1183	0.04395	0.45621
Cdkn2aip	8:47709343-47715021	3.51703	2.27144	-0.63075	1.2836	0.0668	0.534255
Tmem243	5:9100736-9161776	139.164	89.9058	-0.630297	1.19999	0.05535	0.4985
Ppp2r3d	9:124422621-124424154	3.36739	2.17583	-0.630064	0.573188	0.34605	0.847108
Tbcel	9:42412315-42507809	14.6878	9.49107	-0.629975	1.39253	0.0263	0.367135
Gm28035,Gm28038,Lrrc8a,Nup188,Phyhd1	2:30236794-30344266	120.876	78.1096	-0.62996	0.773146	0.2182	0.76277
Gdi1	X:74304997-74311862	33.606	21.7196	-0.629725	0.93898	0.03425	0.412003
Gm11975	11:6546886-6596744	2.31917	1.49986	-0.628784	0.184664	0.7938	0.978434
Zfp385b	2:77410633-77819639	6.79578	4.39578	-0.62852	0.572251	0.1681	0.71284
Mrps15	4:126046924-126055532	27.331	17.6832	-0.628161	1.19205	0.0476	0.471385
Las1l	X:95935334-95956962	16.4955	10.6763	-0.627663	1.07941	0.07715	0.563367
TTC14,Ttc14	3:33800194-33844310	2.87987	1.86394	-0.627653	0.875995	0.09425	0.599985
Spaca6	17:17830718-17843009	17.9467	11.616	-0.627603	0.460844	0.42825	0.888268
Ogfod1	8:94037197-94067921	3.10764	2.01282	-0.626606	0.717581	0.1117	0.633568
Gm11401	11:6242377-6242721	16.0584	10.4019	-0.626482	0.745239	0.19005	0.736125
Ppp1r35	5:137778848-137780110	43.4327	28.1349	-0.626419	0.985757	0.08845	0.588841
Ccar1	10:62743927-62792368	6.37419	4.12991	-0.626131	1.29827	0.0326	0.402976
Pank3	11:35769483-35791285	9.8205	6.36333	-0.626013	1.29008	0.02975	0.387555
Amd2	10:35708690-35711891	4.15581	2.69352	-0.625635	1.20561	0.06155	0.518656
Slc22a7	17:46432184-46438477	10.6815	6.92377	-0.625481	1.04355	0.05225	0.48806
Gm14398	2:181216726-181217799	1.75794	1.13959	-0.625375	0.757849	0.2209	0.765096
Adam10	9:70678996-70780229	3.80398	2.46609	-0.625283	1.0893	0.0373	0.426855
Gm17181	1:87476833-87597845	23.1004	14.981	-0.624787	0.715524	0.7536	0.973003
Bms1	6:118383382-118419417	4.93248	3.19953	-0.624451	1.24369	0.03565	0.418932
Psme1	14:55578122-55585302	114.909	74.5536	-0.624137	0.68272	0.2428	0.782097
Nob1	8:107412485-107425051	15.4862	10.048	-0.624073	1.10502	0.06385	0.525804
Coa7	4:108328139-108341544	53.114	34.4665	-0.623895	0.921296	0.1158	0.640559
Krtcap3	5:31251690-31253202	1.97978	1.28521	-0.623342	0.415993	0.2763	0.804243
Zfyve9	4:108637465-108781904	3.16281	2.05529	-0.621866	1.26865	0.04585	0.464446
Mup20	4:62050233-62054158	30.5033	19.8232	-0.621776	1.18398	0.04255	0.450204
Gm11425	11:83027499-83027997	60.548	39.3489	-0.621757	1.16014	0.0405	0.441461
Gm13194	2:4942173-4942484	20.3818	13.2476	-0.621551	0.770149	0.18585	0.731998
Cdyl	13:35659861-35874064	1.60596	1.04394	-0.621396	0.977445	0.09905	0.609672
Igfbp3	11:7206085-7213923	10.0576	6.53845	-0.621262	1.29742	0.03375	0.409317
Bmf	2:118528756-118549687	6.95223	4.52109	-0.620805	0.333771	0.3791	0.864935
Rasl11b	5:74195287-74199481	3.84958	2.5035	-0.620755	1.07345	0.09805	0.607702
Tnfsf12,Tnfsf12Tnfsf13,Tnfsf13	11:69682137-69696098	8.12765	5.28744	-0.620269	1.25372	0.0797	0.569578
1110059G10Rik	9:122945088-122951000	10.1783	6.62461	-0.619583	1.18504	0.11615	0.640972
Cdk8	5:146231229-146302874	13.7517	8.9513	-0.619436	1.12021	0.04075	0.442813
Soat2	15:102150525-102163474	22.7708	14.8231	-0.619337	1.25413	0.0311	0.394792
Gspt1	16:11203382-11254270	35.1103	22.8627	-0.618899	0.908753	0.13305	0.666862
Gm5239	18:35536582-35536951	31.4606	20.49	-0.618626	0.965058	0.0977	0.607128
Pkn2	3:142790901-142882004	6.75999	4.40304	-0.618521	0.816267	0.06465	0.528191
Brd4	17:32196273-32284722	10.714	6.98014	-0.618165	1.25146	0.0348	0.414896
Gm28437	1:24613188-24613971	19100	12444.8	-0.61803	0.679229	0.24775	0.785689
Gm13080	4:143611657-143612077	4.77177	3.11046	-0.617398	0.547014	0.3176	0.830702
Xrn1	9:95855417-96057803	1.54371	1.00629	-0.617354	0.629811	0.2502	0.787349
Zbed6,Zc3h11a	1:133619861-133661380	23.9581	15.6327	-0.615949	0.649691	0.12405	0.653128
Rbm17	2:11585436-11604153	71.0885	46.3938	-0.615683	0.963756	0.10505	0.621339
Gm13712	2:85156100-85158642	6.14144	4.00839	-0.615554	1.13836	0.06125	0.517849
Cul9	17:46442447-46831413	5.77539	3.76984	-0.615417	0.0287674	0.51415	0.918913
Mcm10	2:4989713-5012791	39.4727	25.7724	-0.615032	1.234	0.04855	0.474962
Lrif1	3:106684986-106736577	5.98428	3.90787	-0.614797	0.887765	0.10315	0.61745
Wdr43	17:71616214-71659031	6.16267	4.02486	-0.614617	1.29092	0.0402	0.440199
Ruvbl1	6:88465408-88497572	9.24675	6.03932	-0.61456	1.14585	0.0575	0.505502
Anp32b	4:46450901-46472657	15.3028	9.99949	-0.613866	1.70037	0.0362	0.421778
Paox	7:140125656-140134334	17.4254	11.3894	-0.613496	0.942153	0.0892	0.590417
Gm7399	10:59702476-59864132	2.88155	1.88387	-0.613142	0.22086	0.74945	0.972363
Gm5045	15:59210907-59211720	40.912	26.7474	-0.613126	1.38061	0.0419	0.447707
Cpeb3	19:37021290-37222139	2.92445	1.91218	-0.612947	0.225609	0.50075	0.914515
Rps12-ps5	7:30240137-30290237	25.2755	16.5341	-0.61229	0.649576	0.2587	0.792409
Senp5	16:31962505-32003287	3.64128	2.38204	-0.612247	0.932477	0.1525	0.694741
Mkln1	6:31356742-31516811	103.22	67.5366	-0.611985	0.74946	0.21455	0.759586
Upf3b	X:37091677-37110322	7.72181	5.05296	-0.61181	1.16415	0.0614	0.518201
Rfc5	5:117357303-117389047	6.00719	3.93117	-0.611731	0.184215	0.4675	0.903637
Pdk1	2:71873223-71903858	25.8495	16.9213	-0.611295	1.21892	0.06875	0.539967
Zfml	6:83914352-83986869	3.587	2.34955	-0.610391	1.23912	0.04265	0.450712
Smarcd2	11:106263178-106272972	38.283	25.0785	-0.610252	0.961868	0.075	0.557487
Gm12960	4:111719983-111829184	6.20356	4.06447	-0.61003	0.963311	0.10935	0.629625
Gm13375	2:20969053-20969997	6.80238	4.45777	-0.609718	0.894	0.1597	0.70285
Gm12447	4:46300006-46346412	2.14781	1.40765	-0.609582	0.411988	0.43085	0.889621
Papola	12:105784693-105838944	31.1364	20.4067	-0.609564	0.492173	0.20925	0.754979
Gm10540	18:45268859-45896509	16.904	11.0788	-0.609561	0.250127	0.7807	0.976498
Rps6-ps1	15:76337615-76338365	30.4721	19.9735	-0.609407	1.10626	0.04955	0.478564
BC005537	13:24801656-24814013	33.9065	22.2306	-0.609019	2.0835	0.0307	0.392508
Gid4	11:60400625-60450927	8.42639	5.52476	-0.609004	1.22237	0.10505	0.621339
Akap7	10:25169089-25307870	3.07758	2.01886	-0.608257	0.571314	0.19925	0.745434
Gm12155	11:44387114-44387274	49.7013	32.6114	-0.607904	0.800383	0.4271	0.887646
Gstm7	3:107926333-107931817	48.6021	31.8953	-0.607672	1.14387	0.0448	0.459935
Thap3	4:151982638-151988997	17.7403	11.6477	-0.606991	1.03809	0.1194	0.64636
Tgif1	17:70844204-70853546	22.6542	14.8775	-0.606653	1.16405	0.0712	0.546855
Usmg5	19:47067747-47090625	110.758	72.7469	-0.60646	0.960007	0.11385	0.637244
Akap8	17:32303675-32321153	8.33493	5.47597	-0.606055	1.22233	0.0396	0.43733
Acsm5	7:119526303-119543793	41.5119	27.2747	-0.605959	1.29592	0.03745	0.427312
Trmt13	3:116562972-116630984	5.1366	3.37535	-0.605778	0.790562	0.202	0.748019
Ppfia1	7:144476757-144553729	16.0647	10.5596	-0.605339	0.538356	0.34325	0.845502
Gm5871	5:109016197-109016915	3.40236	2.2371	-0.604909	0.71076	0.2432	0.782465
Dhrs3	4:144892826-144928209	158.488	104.281	-0.603896	1.27823	0.0532	0.491306
Arhgap29	3:121953325-122016151	12.1539	7.99858	-0.603605	1.23654	0.037	0.425394
Alyref	11:120592120-120598365	11.9145	7.84251	-0.603333	0.848638	0.1656	0.709953
Hint3	10:30608140-30618479	48.9402	32.2167	-0.603211	1.03198	0.08475	0.581312
Nt5c3	6:56882399-56923932	17.8098	11.7255	-0.603023	0.892325	0.0964	0.604493
Terf1	1:15805645-15844052	6.91238	4.55135	-0.602887	0.891116	0.13805	0.674011
Gm10068	1:58646687-58695989	10.3027	6.79065	-0.601399	0.759387	0.2032	0.749128
Socs4	14:47276930-47296098	2.17632	1.43471	-0.601132	1.60855	0.05135	0.48456
Gm8444	15:81843342-81843699	5.43123	3.5823	-0.600393	0.628989	0.3674	0.858981
Cyp3a25	5:145977193-146009618	363.852	239.992	-0.600363	0.886517	0.09235	0.596355
Agl	3:116739998-116808166	9.38193	6.19031	-0.599874	1.10678	0.0364	0.422813
Gm6275	X:136929785-136930907	6.97593	4.60373	-0.599583	0.963465	0.106	0.623436
Gm11703	11:115724325-115724808	29.1276	19.2233	-0.599532	0.99768	0.08435	0.580502
Car5a	8:119910359-124345724	39.0974	25.806	-0.599367	0.1005	0.6973	0.964148
Nat8b	6:85932680-85933379	9.8503	6.50176	-0.599338	0.853099	0.13855	0.6748
Fam188a	2:12347262-12419470	25.8243	17.0461	-0.599288	0.803766	0.1715	0.716505
Man2b2	5:36806920-36830653	33.2328	21.9563	-0.597975	0.771548	0.1036	0.618406
Bid	6:120836229-120916853	10.4805	6.92439	-0.597954	0.401118	0.41925	0.884011
Smad3	9:63646766-63757994	3.77524	2.49531	-0.597347	0.94599	0.05275	0.489772
Gm28911	1:123205148-123205265	1012.93	669.643	-0.597069	0.945294	0.11035	0.631229
ZNF383	7:29908222-29916813	1.69448	1.12027	-0.596999	0.790971	0.16415	0.708343
Btg3	16:78359859-78377192	1.52631	1.00909	-0.596997	0.548339	0.2646	0.796302
Fdx1	9:51943306-51963533	85.2627	56.3754	-0.596848	1.23239	0.0515	0.485275
Gm28529	18:6435950-6516108	2.24158	1.48223	-0.596746	0.242675	0.7653	0.974644
Gm8129	6:52346729-52346942	424.843	280.978	-0.59647	1.10574	0.0522	0.487862
Rpl17-ps5	5:22550436-22807850	128.485	84.9773	-0.596449	1.20787	0.0388	0.433232
Gm13991	2:116527842-116528490	32.0547	21.2007	-0.59642	1.14141	0.05565	0.499344
Gm11767	11:119935802-119942698	2.40442	1.59069	-0.596036	0.43877	0.42845	0.888411
Gstm5	3:107877229-107898686	8.32788	5.51103	-0.595627	0.754931	0.1979	0.744074
Cic	7:25267703-25294159	32.4129	21.4632	-0.594705	0.514633	0.384	0.867401
Upf1	8:70315774-70353273	9.59423	6.35378	-0.594552	1.43753	0.03665	0.42388
Sfswap	5:129501230-129571383	7.68826	5.09305	-0.594126	1.25924	0.05	0.480074
Ttc23	7:67647409-67726576	24.9477	16.5271	-0.594075	0.867869	0.07015	0.543958
Gm5564	5:138504711-138505951	13.2263	8.76241	-0.594011	1.11977	0.06455	0.527941
Fam109b,Smdt1	15:82338941-82349091	141.48	93.7365	-0.593911	1.1754	0.1119	0.63383
Mbl2	19:30232927-30239685	757.951	502.285	-0.593598	1.14574	0.0667	0.534005
Ehmt2	17:34898468-34914052	92.5207	61.345	-0.59283	0.928519	0.16095	0.704591
Gm14472	2:153407461-153529971	47.1187	31.2442	-0.592713	0.544599	0.32255	0.833661
Igf1	10:87826376-87937042	696.311	461.86	-0.592275	0.714206	0.2446	0.783446
Aldoc	11:78322967-78327781	12.9766	8.60803	-0.592152	0.710773	0.2045	0.750564
Anxa7	14:20455260-20480133	37.6945	25.0138	-0.591631	1.22283	0.03875	0.432972
Rab11a	9:64715298-64737758	104.449	69.312	-0.59162	1.0385	0.0878	0.587906
Stt3a	9:36729343-36767679	16.2016	10.7539	-0.591276	0.594348	0.33715	0.842403
Fnip1	11:54438198-54518235	5.37326	3.56655	-0.591269	1.14536	0.04665	0.467316
Mgst3	1:167371965-167393841	24.7375	16.432	-0.590194	1.07624	0.06065	0.516184
Gm7781	X:130524636-130525424	2.62717	1.74585	-0.589578	0.594554	0.2705	0.800611
Krcc1	6:71213939-71322233	43.0551	28.6148	-0.589421	1.12949	0.06535	0.52996
Oraov1	7:144915099-144939869	11.4517	7.61343	-0.588947	0.208786	0.69545	0.963925
Ppp1r2-ps6	17:6253902-6254523	4.13235	2.74758	-0.588799	0.661094	0.27135	0.801004
A1cf	19:31868760-31949406	20.1002	13.3652	-0.588735	1.23943	0.042	0.447907
Gm9364	3:122861883-122862676	2.19185	1.45749	-0.588668	0.650146	0.2831	0.808243
Ccdc9	7:16274041-16286795	21.3786	14.2213	-0.588112	0.752053	0.1419	0.679614
Setd6	8:95715914-95719010	42.1021	28.0102	-0.58794	0.444697	0.4237	0.886115
Gm13433	2:25517981-25546940	16.2709	10.8258	-0.587821	0.24827	0.7972	0.978724
Ccl9	11:83572918-83578636	22.5255	14.9883	-0.587724	1.0084	0.08595	0.583677
Pfas	11:68985696-69008460	1.94564	1.29522	-0.587054	0.400604	0.34915	0.848987
Dnajc10	2:80315465-80354043	7.52007	5.00695	-0.586814	0.632976	0.24155	0.781312
Rragc	4:123917445-123936997	26.6334	17.7329	-0.58681	1.19661	0.03505	0.41608
Snapc1	12:73964529-73984820	1.71125	1.13945	-0.586716	0.794693	0.1956	0.741787
Gm10240	15:68309818-68310301	67.0614	44.6727	-0.586088	1.11141	0.0528	0.490065
Pnrc2	4:135870917-135873850	31.7489	21.1517	-0.585934	0.262332	0.2525	0.788825
Lats1	10:7681208-7716458	3.3936	2.26181	-0.585341	1.28837	0.04735	0.470296
Srp9	1:182124736-182132407	69.0355	46.0347	-0.584617	1.12691	0.0543	0.495098
Dlat	9:50634632-50659780	22.0895	14.7319	-0.584419	0.615352	0.2761	0.80412
Hnf4aos	2:163492317-163572910	8.59559	5.73312	-0.584276	0.0460457	0.60665	0.944228
Rps6	4:86854659-86857412	351.7	234.587	-0.584225	1.12365	0.05815	0.507624
Dnajc28	16:91611467-91646952	5.45121	3.63626	-0.584122	0.52046	0.31165	0.826937
Gm14287	2:157528868-157528985	51.9437	34.6785	-0.582907	0.56711	0.6267	0.949144
Akr1a1	4:116636509-116651680	364.09	243.163	-0.582367	0.616275	0.24155	0.781312
Ddx50	10:62616022-62651218	13.6744	9.13379	-0.582195	1.18855	0.03555	0.418562
Rsrc2	5:123728425-123749414	12.2924	8.21232	-0.581901	0.937214	0.0812	0.573197
Ltv1	10:13178639-13193137	5.8557	3.91321	-0.581487	1.13503	0.0712	0.546855
Rps12-ps6	X:124349724-124350123	23.4194	15.6506	-0.581482	0.808945	0.1587	0.701706
Acly	11:100476352-100528000	25.8703	17.2888	-0.581457	0.844434	0.0668	0.534255
Enpp3	10:24773813-24836195	10.3692	6.92974	-0.581435	1.22236	0.0535	0.492089
Rpl10-ps2	8:106927768-106928413	20.5689	13.7484	-0.581206	0.916083	0.1119	0.63383
Slc35d2	13:64096309-64129330	21.9468	14.6727	-0.580873	1.15422	0.0388	0.433232
C8a	4:104815678-104876398	66.6676	44.5724	-0.580835	0.53175	0.3513	0.850055
Tmem87a	2:120355311-120504913	3.57046	2.38755	-0.580581	0.477318	0.4015	0.875619
Kng1	16:23057864-23082068	1655.01	1107.06	-0.58011	0.840261	0.13465	0.669301
Gtpbp10	5:5537453-5559538	4.20625	2.81465	-0.57958	0.746749	0.13575	0.670805
Ppp4r2	6:100833637-100868717	4.6185	3.09192	-0.578919	1.35309	0.05705	0.503887
Phlda1	10:111506285-111508645	39.9583	26.7605	-0.578391	1.09241	0.0498	0.479327
Ncapd2	6:125168006-125191701	3.77912	2.53117	-0.578247	0.563367	0.28725	0.811155
Gm10311	8:69373527-69373914	3.97574	2.66339	-0.577959	0.605526	0.45305	0.898202
Sub1	15:11981338-11996983	57.3821	38.4594	-0.577263	0.690671	0.242	0.78165
Pias4	10:81153265-81167923	16.0858	10.7955	-0.575364	0.656671	0.1499	0.691168
Gm6377,Sh3bgrl	X:109095364-109200439	29.3033	19.6778	-0.574494	1.36401	0.0459	0.464624
Gm5835	1:143093346-143094616	283.591	190.46	-0.574325	1.14151	0.0556	0.499124
Unc13b	4:43058952-43264871	1.99867	1.34238	-0.574249	0.488311	0.2129	0.758319
Gm12112	11:32903136-32926160	90.293	60.6499	-0.574109	0.850543	0.13925	0.675877
mt-Atp6,mt-Atp8,mt-Co3	MT:7765-9390	82122.9	55198	-0.573168	0.302486	0.4649	0.902492
Gm11893	4:25541790-25542281	4.68506	3.14983	-0.572794	0.548091	0.3528	0.850702
Ccdc167	17:29549787-29717012	10.2284	6.87684	-0.572765	0.27308	0.7569	0.973566
Cnot11	1:39534991-39546889	6.17277	4.15041	-0.572664	0.994677	0.0774	0.563811
Jmy	13:93430096-93499808	2.2585	1.51896	-0.572285	1.12958	0.06385	0.525804
Clk1	1:58410188-58424066	55.4807	37.3147	-0.57224	0.674452	0.2923	0.814091
Gm16288	5:30232580-30272012	23.4219	15.7534	-0.572201	0.308631	0.63275	0.950505
Abcg8	17:84658233-84700333	51.3844	34.571	-0.571768	0.81256	0.15465	0.697139
Nudt19	7:35547184-35556935	76.3287	51.3641	-0.571465	0.967258	0.12585	0.656108
Rp9	9:22448310-22468356	79.1695	53.2903	-0.571073	1.15103	0.04675	0.467765
Lemd3	10:120923412-120979332	1.84089	1.23914	-0.571057	0.930216	0.1126	0.634881
Paip1	13:119428600-119458218	15.5553	10.4719	-0.57088	0.828291	0.2361	0.777194
Cul3	1:80264922-80340480	48.8958	32.9199	-0.570749	0.69631	0.26365	0.795769
Gm7516	1:81797240-81797946	3.83347	2.582	-0.57016	0.580715	0.2731	0.802184
Camta1	4:150914561-151861876	3.88509	2.61797	-0.569502	0.214259	0.6383	0.951953
Zrsr1	11:22758598-22982382	8.25467	5.56302	-0.569342	0.511137	0.4288	0.888603
Casp9	4:141793611-141846990	5.80696	3.91414	-0.569086	0.737143	0.20185	0.747879
Cfdp1	8:111768472-111854310	25.4797	17.1775	-0.568826	1.14858	0.04825	0.473968
Gm6829	X:9327748-9328108	24.3655	16.4302	-0.568495	0.800461	0.1694	0.714095
Ctnna1	18:35118887-35254773	41.55	28.0201	-0.568388	1.3164	0.042	0.447907
Plekhg3	12:76533559-76579039	15.0057	10.1229	-0.567898	1.17568	0.04655	0.467118
Cyp2c38	19:39389555-39463075	81.8968	55.2555	-0.567689	1.14546	0.05415	0.494565
Htatsf1	X:57053582-57067183	10.6883	7.21148	-0.567665	1.15017	0.05785	0.506512
Parp2	14:50807945-50821300	2.44992	1.65338	-0.567316	0.878104	0.14685	0.686946
Pum1	4:130663320-130781564	10.3782	7.00417	-0.567277	1.15699	0.04535	0.46241
Eif4a-ps4	1:60703931-60705149	290.705	196.224	-0.567054	1.13164	0.0543	0.495098
Gm15148	X:151493113-151493269	251.311	169.658	-0.566841	0.787698	0.16295	0.706944
Ncoa1	12:4247362-4477182	2.13303	1.44028	-0.566559	1.18469	0.06195	0.520216
Cyp2b9	7:26173410-26210661	324.133	218.881	-0.566438	1.00989	0.09195	0.595578
Gm8213	6:116195417-116195858	28.8831	19.506	-0.56631	0.898216	0.114	0.637509
Wwp1	4:19575161-19708993	10.8884	7.3537	-0.566247	1.00978	0.0906	0.593184
Gm10364	14:55038461-55042979	4.60174	3.10792	-0.566229	0.792911	0.15455	0.697032
H2-K2	17:33974830-33978790	20.4507	13.8153	-0.565883	1.11109	0.0688	0.540086
Dclre1c	2:3424130-3475031	2.33051	1.5746	-0.565656	0.48738	0.29845	0.817973
4931440P22Rik	3:65507256-65555518	1.55805	1.05281	-0.565494	0.301911	0.7234	0.968644
Gm18889	15:36009478-36140400	3.02975	2.04745	-0.565369	0.75583	0.2089	0.754608
Prkra	2:76629897-76648015	12.3786	8.36542	-0.56534	1.02297	0.0861	0.583962
Aste1	9:105162155-105527319	3.25026	2.19665	-0.565251	0.350404	0.4514	0.897763
Gm7803	X:50325517-50326532	15.4239	10.4301	-0.564422	1.04481	0.0831	0.577401
Proser3	7:30539133-30559838	2.52385	1.70732	-0.563887	0.257931	0.60155	0.943149
Ces1b	8:93056726-93080017	88.0827	59.6015	-0.563509	1.06963	0.0711	0.546583
Ifngr1	10:19591948-19610229	15.7335	10.6468	-0.563425	0.719555	0.0977	0.607128
Slc35c2	2:165276553-165287869	27.7722	18.794	-0.563368	0.947364	0.1169	0.642107
Cpb2	14:75242286-75283551	156.26	105.787	-0.562785	1.11485	0.05905	0.510624
Gm4342	8:119910359-124345724	101.179	68.502	-0.562689	0.0626271	0.67485	0.960228
Prr3	17:35972540-35989462	6.04349	4.09174	-0.562666	0.289212	0.51615	0.919458
C1galt1c1	X:38630784-38635087	21.7941	14.7618	-0.562066	1.11002	0.0612	0.51772
Arsk	13:76060421-76098660	2.21113	1.49768	-0.562052	0.715176	0.1481	0.688438
Pi4k2b	5:52741586-52769344	8.20879	5.56308	-0.561285	1.2491	0.04965	0.478835
Gm15596	6:18156336-18157120	4.13046	2.79976	-0.560998	0.668494	0.24705	0.785247
Gm11196	11:78567167-78697373	9.23848	6.26467	-0.560416	0.308153	0.59525	0.941712
Chd1	17:15704966-15772610	4.23971	2.87523	-0.560288	0.879265	0.0852	0.582234
Xrcc4	13:89655311-90143907	3.00038	2.03483	-0.560238	0.281101	0.59615	0.941915
CAAA01116243.1	1:182976275-182976429	31.4555	21.3348	-0.560105	0.344254	0.57025	0.935274
Zmynd15	11:70453982-70466202	2.15164	1.45984	-0.559622	0.363339	0.411	0.880211
Gm13370	2:24976032-25054057	73.0206	49.5656	-0.558965	0.375042	0.52135	0.921091
Gm14584	X:53418330-53418967	14.5833	9.90152	-0.558593	0.885341	0.1366	0.67187
Rab20	8:11453391-11480241	7.94161	5.39226	-0.558542	0.949925	0.1071	0.62563
Arl13b	16:62793684-62847040	3.2501	2.20694	-0.558433	0.439477	0.44445	0.895084
Slc22a4	11:53983122-54028090	1.69554	1.15165	-0.558045	0.491282	0.3242	0.834684
Khdrbs3	15:68928419-69093512	17.0417	11.5755	-0.558001	1.1868	0.05205	0.487303
Ddx42	11:106216925-106249139	10.7593	7.31494	-0.556672	0.795663	0.07425	0.555145
Zfp97	17:17121414-17146831	1.95012	1.32586	-0.556636	0.920412	0.17335	0.718435
Gckr	5:31297580-31327300	53.9805	36.7027	-0.556551	1.197	0.052	0.487153
Sepsecs	5:52640086-52669729	13.8765	9.43528	-0.556502	1.1112	0.05175	0.486168
Ireb2	9:54863754-54912534	9.5745	6.51361	-0.555739	1.14602	0.0475	0.470983
Gxylt1	15:93239741-93275161	2.26929	1.54406	-0.555512	1.78924	0.08665	0.585147
Mast2	4:116306761-116464183	7.73801	5.26557	-0.555373	0.373968	0.3052	0.823004
Ccnh	13:85189407-85289029	17.395	11.8378	-0.555271	0.400476	0.49985	0.91417
Gm26965,Zfp58,Zfp87	13:67490166-67526177	13.0535	8.88345	-0.555241	0.462078	0.41315	0.881255
Ubxn1	19:8871558-8875663	143.505	97.669	-0.555127	1.2046	0.0543	0.495098
Capn7	14:31336637-31436078	7.12625	4.85139	-0.554746	0.541339	0.36925	0.860096
Tomm5	4:45105207-45108114	42.5147	28.9456	-0.554617	1.03774	0.0758	0.559771
Dync1li1	9:114688789-114724302	4.33997	2.95531	-0.554378	1.53831	0.069	0.540632
2010010A06Rik	18:75288654-75297329	5.41099	3.68672	-0.553554	0.294469	0.5579	0.932108
Tlr5	1:182954787-182976044	5.25385	3.57985	-0.553476	0.827682	0.14415	0.683113
Skp1a	11:51949881-52286179	110.633	75.4177	-0.552803	0.582525	0.34525	0.846635
Med13	11:86201369-86357602	2.46515	1.68079	-0.552536	0.522669	0.23515	0.776646
Akr1b3	6:34290264-34324249	4.6282	3.15609	-0.552313	0.604516	0.3204	0.832347
4921531C22Rik	2:179912145-179979013	1.6574	1.13038	-0.552117	0.313633	0.6401	0.952425
Epb4.1l1	2:156420908-156543214	1.95538	1.33366	-0.552061	0.39052	0.43725	0.892281
Paip2	18:35598616-35627244	72.2945	49.3108	-0.551981	0.818413	0.1581	0.701299
Ewsr1	11:5069688-5106093	83.2546	56.793	-0.551818	0.719308	0.305	0.822837
Ttc32	12:9029996-9036394	11.5639	7.8899	-0.551555	0.895293	0.1273	0.658216
Rps6-ps2	8:88806390-88807140	11.3944	7.77428	-0.551546	0.853088	0.1281	0.659325
Cutc	19:43689671-43768638	22.7133	15.498	-0.55146	0.527469	0.4038	0.876695
Gm13430	2:36389131-36389419	8.54616	5.83186	-0.551322	0.484263	0.38395	0.867401
Rnf2	1:151428541-151500955	4.60152	3.14012	-0.551291	0.453203	0.2613	0.794013
Slc30a3	5:31086105-31112526	1.50932	1.03009	-0.551132	0.268443	0.44505	0.895257
Cdv3	9:103353093-103365840	37.2855	25.4508	-0.550905	1.09085	0.06585	0.531401
Akr1c12	13:4268171-4279433	68.4517	46.731	-0.550705	1.11732	0.0598	0.51311
Snapc5	9:64179296-64182684	26.3492	17.9908	-0.550498	1.15313	0.0873	0.586698
Wwc1	11:35838399-35980527	30.7358	20.9937	-0.549966	0.621356	0.1057	0.622654
Gstp1	19:4035406-4037921	330.823	225.984	-0.549835	1.00865	0.0721	0.549521
Azi2	9:118040498-118150196	27.2802	18.6356	-0.54979	0.732989	0.15055	0.692152
Pah	10:87521794-87584136	390.681	266.926	-0.549554	0.73556	0.211	0.756693
Lyar	5:38220469-38234306	8.3909	5.73723	-0.548471	0.967277	0.10525	0.621742
Polr2g	19:8793128-8798557	10.8227	7.40094	-0.548274	0.892795	0.12415	0.653313
Sin3a	9:57072039-57142722	6.77118	4.63187	-0.547814	0.401787	0.2814	0.807273
Ptk2	15:73205104-73423191	3.74419	2.56139	-0.547726	1.035	0.08165	0.574047
Haus7	X:73437314-73459044	16.341	11.18	-0.547584	0.678455	0.2305	0.77326
Bzw2	12:36091845-36156825	3.05925	2.09349	-0.54727	0.80456	0.1711	0.716094
Acap3	4:155891821-155907251	2.72546	1.8653	-0.547094	0.576506	0.2455	0.784105
Zfp131	13:119765186-119790805	3.63073	2.48539	-0.546788	0.921737	0.10655	0.624365
Gm28062,Hnrnpu	1:178319129-178337797	76.1977	52.1641	-0.546689	0.453925	0.24355	0.7827
Nemf	12:69311543-69357176	3.97836	2.72482	-0.546011	1.02822	0.08865	0.589236
Gm6548	17:78850791-78851956	231.046	158.256	-0.545917	1.15296	0.0734	0.552771
Mia3	1:183326724-183351108	88.7348	60.7804	-0.545893	0.58604	0.1336	0.667545
Ctnnal1	4:56810934-56865188	1.84951	1.26714	-0.545572	0.457924	0.24595	0.7845
Thumpd1	7:119715095-119720765	8.46172	5.79836	-0.545305	1.23492	0.0566	0.502581
6430573F11Rik	8:36457547-36514320	5.93633	4.06819	-0.545185	0.825079	0.2176	0.762145
Gm20563	13:62006665-62006941	120.485	82.5701	-0.545168	0.943433	0.1002	0.61197
Dbi	1:120113279-120121078	1506.98	1032.79	-0.545119	0.978837	0.0943	0.600129
F3	3:121723536-121735052	1.86649	1.27919	-0.54509	0.721057	0.223	0.766875
Pgam5	5:110259129-110286186	9.89387	6.78178	-0.544872	0.242397	0.64805	0.954206
Cox11	11:90638172-90688366	4.62252	3.16925	-0.544535	0.484909	0.42225	0.885422
Tbca	13:94788942-94842899	41.484	28.4526	-0.543993	1.06209	0.07665	0.562216
Tom1l1	11:90638172-90688366	8.65993	5.94296	-0.543173	0.751269	0.219	0.763382
Rcn2	9:56041844-56061882	4.58616	3.14853	-0.542608	1.01428	0.102	0.6155
Ctage5	12:59129719-59191583	85.762	58.885	-0.542438	0.852224	0.11675	0.641936
Nsun4	4:116032841-116053876	18.1098	12.4356	-0.542288	0.579809	0.16895	0.713724
Epb4.1l2	10:25359797-25523519	1.75127	1.20271	-0.542106	0.90151	0.11525	0.6397
Stk3	15:34875495-35155806	3.06395	2.10474	-0.541754	0.922101	0.09545	0.60252
Me1	9:86581370-86701253	40.8303	28.061	-0.541077	1.0858	0.05095	0.48338
Svil	18:4920539-5119299	6.0661	4.16916	-0.54101	0.539804	0.3441	0.845952
Rmi1	13:58391141-58411149	2.46858	1.69739	-0.540364	0.290414	0.67035	0.959459
Orc5	5:22486484-22550429	86.5342	59.5135	-0.540055	0.99979	0.1581	0.701299
B2m	2:122120107-122186189	3835.28	2638.94	-0.539373	0.958385	0.13585	0.670908
Fbxl17	17:63057451-63500017	8.30998	5.71853	-0.5392	0.830089	0.12235	0.651113
Madd	2:91137359-91183837	8.81505	6.06732	-0.538911	0.393139	0.5429	0.927725
Armc10	5:21645812-21662694	4.86373	3.34803	-0.538748	0.883115	0.1015	0.614642
Igkv4-55	6:69600065-69617424	4.06907	2.80102	-0.538747	0.368528	0.49865	0.913747
Rps11-ps2	11:116336352-116413032	90.2924	62.1588	-0.538647	0.940582	0.11095	0.632158
Kansl2	15:98518820-98534244	8.94434	6.15763	-0.538602	1.03683	0.0824	0.575768
Gm17491	8:22462614-22569607	4.23369	2.91653	-0.537665	0.243432	0.75125	0.972664
Gtdc1	2:44564411-44927657	6.31467	4.35082	-0.537419	0.728903	0.13965	0.676427
Hmg20a	9:56418643-56496884	4.48156	3.08909	-0.536819	1.00876	0.0892	0.590417
Gopc	10:52337023-52382124	5.07786	3.50012	-0.536816	1.05411	0.06995	0.543301
Ilf2	3:90476200-90491033	7.44202	5.12982	-0.536787	0.614666	0.29035	0.812888
Cdc16	8:13757675-13781938	14.557	10.0371	-0.536378	0.836542	0.1489	0.689748
Kat2b-ps	5:93390601-93393091	5.85747	4.03972	-0.536023	1.05873	0.09975	0.611034
Timm9	12:71111427-71136675	60.3655	41.6656	-0.534869	1.08271	0.07365	0.553501
Rps24	14:24490680-24496146	305.712	211.01	-0.534862	1.01184	0.0866	0.585043
2210408F21Rik	6:31220350-31337404	19.1376	13.2121	-0.53455	0.80206	0.21525	0.760223
Rapgef2	3:79062515-79286517	2.35418	1.62538	-0.534444	0.620958	0.1153	0.639777
Uevld	7:46923538-46958527	1.51615	1.04683	-0.534389	0.715043	0.1491	0.690074
Ppp2r3d	9:124438994-124440897	7.43702	5.13524	-0.534293	0.580503	0.3092	0.825488
Acy1	9:106432980-106438319	26.6932	18.4362	-0.533934	0.784782	0.18725	0.733027
Phf20l1	15:66577571-66645255	3.11435	2.15124	-0.53376	1.00252	0.0967	0.605081
Pik3ca	3:32397670-32468486	9.12729	6.30537	-0.533607	0.262273	0.5458	0.928686
Msh2	17:87672329-87723713	3.82361	2.64164	-0.533503	0.81284	0.0953	0.602286
Eps15	4:109280267-109387817	11.6442	8.04479	-0.53349	0.632253	0.2483	0.786062
Gm20425,Srprb,Trf	9:103188031-103230444	21617.8	14943.1	-0.532743	0.322404	0.6608	0.957425
Slc30a4	2:122681232-122721456	1.9344	1.33734	-0.532522	1.09386	0.10025	0.612025
Ccdc132	6:3498381-3603319	3.46796	2.39774	-0.532412	0.364744	0.45055	0.897538
Mreg	1:72159441-72212307	11.9917	8.29234	-0.532181	0.982867	0.07815	0.565912
Asap3	4:136206364-136245216	4.26247	2.94808	-0.531914	1.03512	0.08955	0.591065
9030616G12Rik	10:128971196-128978115	32.8136	22.7028	-0.531422	0.92455	0.11365	0.636851
Gm8430	6:122447295-122486313	323.25	223.669	-0.531282	1.09992	0.06245	0.52164
Tbce	13:13954673-14039638	14.9763	10.3628	-0.531269	0.621635	0.40685	0.878115
Serpinb8	1:107590005-107610484	9.20388	6.3687	-0.531243	0.440717	0.45915	0.900418
Aldoart2	12:55565238-55566896	1.69998	1.17646	-0.531067	0.595148	0.2675	0.798491
Fbxo28	1:182313101-182341629	5.0722	3.5105	-0.530935	0.674038	0.22245	0.766334
Smim11	16:92301285-92313041	68.9425	47.7246	-0.530659	1.01673	0.08755	0.587287
Dennd6a	14:26579577-26669883	1.9884	1.37655	-0.530551	0.256375	0.6907	0.962979
Poc1a	9:106281060-106350521	2.09765	1.45242	-0.530317	0.454188	0.43955	0.893238
Gm28778,Ormdl1,Osgepl1	1:53297094-53352752	19.0867	13.2169	-0.530181	0.755664	0.4018	0.875787
Rpl21-ps10	3:38107439-38107922	32.0237	22.1783	-0.529993	0.901126	0.1206	0.648074
Cd79a	7:24897380-24902197	1.55548	1.0774	-0.529804	0.598889	0.2763	0.804243
Cpsf4	5:145167212-145182041	10.7812	7.46805	-0.529718	0.915503	0.1066	0.624511
Adss	1:177762961-177796511	10.0974	6.99891	-0.528781	0.983317	0.1028	0.616921
Zfp292	4:34803112-34882960	2.54642	1.76538	-0.528494	0.985042	0.0855	0.582692
Gm14163	2:152604326-152612729	6.31409	4.37752	-0.528459	0.272884	0.6237	0.948489
A930001C03Rik	19:4425458-4477447	2.41048	1.67138	-0.528281	0.24629	0.7021	0.965099
Dek	13:47084774-47106201	23.7506	16.4729	-0.527872	0.972503	0.0872	0.586481
Bckdhb	9:83925144-84124240	88.3334	61.2807	-0.527527	0.886856	0.13825	0.674343
Gm8494	5:146575193-146576123	14.4798	10.0455	-0.527493	1.01255	0.1011	0.613975
Gm12222	11:54177771-54213285	107.782	74.7762	-0.527462	0.861645	0.12675	0.657425
Xrcc6	15:81987834-82040085	10.9678	7.61142	-0.527037	0.31173	0.42855	0.888455
Cyp2c68	19:39688833-39741054	310.944	215.791	-0.52702	1.05731	0.0855	0.582692
Pfdn2	1:171345669-171360798	22.9986	15.9613	-0.526964	0.868141	0.21855	0.763041
1110034G24Rik	2:132686930-132751055	11.723	8.13615	-0.526929	0.766881	0.19695	0.743126
Gltscr2	7:15937837-15946108	72.6447	50.4231	-0.526774	1.19027	0.0738	0.553814
Polr2h	16:20693281-20722267	15.4835	10.751	-0.526261	0.445227	0.43535	0.891425
Sat1	X:155213131-155216449	77.8552	54.061	-0.526206	1.0258	0.10095	0.613614
Gm20430	14:57581001-57758388	361.796	251.26	-0.525997	0.532144	0.3587	0.853983
Ranbp2	10:58446851-58494155	5.74168	3.98772	-0.525907	1.05622	0.07485	0.55696
Clk4	11:51253650-51281766	45.9596	31.924	-0.525723	0.564587	0.3381	0.842872
Pcgf3	5:108461231-108506976	4.80706	3.33917	-0.525668	0.835654	0.0799	0.570231
Gm2950	9:99220047-99220567	2.91261	2.02347	-0.525479	0.444276	0.42165	0.88509
Crbn	6:106769119-106800074	12.4009	8.61679	-0.525221	0.908129	0.128	0.659247
Mprip	11:59661304-59780860	23.7303	16.4896	-0.525172	0.870685	0.1199	0.647074
Nars2	7:96947577-97064761	4.60323	3.19902	-0.525014	0.639796	0.25045	0.787364
Sh3yl1	12:30911667-30960162	4.84721	3.36859	-0.525012	0.857942	0.1522	0.694384
Erbb2ip	13:103818786-103920514	11.8865	8.26124	-0.524892	1.06438	0.06605	0.531898
Taok1	11:77508098-77607815	2.34157	1.62748	-0.524838	0.458588	0.4261	0.88727
Zfp318	17:46383730-46420920	5.81845	4.04611	-0.5241	0.570133	0.1903	0.736381
Irak1bp1	9:82829539-82847687	1.47883	1.02837	-0.524092	0.590372	0.3424	0.844972
Gm18737	17:37860806-37861743	2.67745	1.86197	-0.524031	0.61252	0.27845	0.805619
Mtrf1l	10:5811886-5823910	4.29454	2.98661	-0.523993	0.388335	0.4732	0.905353
Tnfrsf19	14:60963833-61046855	2.04565	1.42275	-0.523875	0.886802	0.1545	0.697019
Snrpg	6:86371582-86378902	44.9322	31.2546	-0.523679	0.835712	0.15225	0.694451
Txnrd3	6:89643987-89675529	3.30405	2.29906	-0.523189	0.864357	0.1358	0.670857
Btbd1	7:81792074-81829431	14.674	10.2112	-0.523104	1.14056	0.05955	0.512179
Diap2	X:129749741-130465834	1.81717	1.2646	-0.52301	0.564699	0.1792	0.724826
Abtb1	6:88835914-88841935	27.2767	18.9833	-0.522936	1.10927	0.0718	0.548536
Gm12807	4:110397660-111664324	2.24102	1.55978	-0.522815	0.391655	0.5031	0.915286
Zfp946	17:22424221-22456689	3.26248	2.27118	-0.522529	0.814594	0.15835	0.701498
Gm8885	1:72087856-72088454	5.53252	3.85211	-0.52229	0.628589	0.27095	0.80076
Gm14044	2:130384882-130385329	94.1071	65.5273	-0.522208	1.02171	0.07025	0.544337
Cyp2c44	19:44005021-44029247	302.102	210.384	-0.522007	1.01623	0.0981	0.60785
Mat2a	6:72432798-72439558	30.5052	21.2478	-0.521745	1.0821	0.07125	0.547002
Mpc1	17:8282903-8311080	352.929	245.828	-0.521732	1.06667	0.0734	0.552771
Gm20517,Med20,Usp49	17:47611581-47704286	8.62081	6.00624	-0.521362	0.386771	0.5058	0.916134
Gm28438	1:24612774-24613119	6019.7	4196.03	-0.520669	0.849277	0.12775	0.658825
Tenc1	15:102102987-102116401	22.1599	15.451	-0.520253	1.09973	0.0776	0.564342
Vps37a	8:40423814-40634797	7.37012	5.13919	-0.520147	0.843537	0.15705	0.700058
Mr1	1:155127276-155146814	1.87588	1.30819	-0.519999	0.727034	0.21625	0.761093
Gm14269	2:170463513-170463819	37.4827	26.1397	-0.519981	0.800567	0.1656	0.709953
Vbp1	X:75514298-75534942	4.67732	3.26246	-0.519721	0.976369	0.14005	0.676992
Cops2	2:125830303-126152004	23.8505	16.6366	-0.519661	0.957481	0.12135	0.64952
Tbc1d31	15:57912198-57970067	3.43976	2.39977	-0.519409	0.557711	0.3603	0.854855
Naga	15:82329531-82338826	28.0607	19.5775	-0.519352	1.11701	0.06665	0.533869
Ermard	17:15041640-15074993	6.26275	4.37185	-0.518555	0.845681	0.1346	0.669177
2700097O09Rik	12:55045660-55080110	4.81985	3.36463	-0.518542	0.579663	0.292	0.813906
Nedd1	10:92684745-92722420	4.27414	2.98404	-0.518367	0.947945	0.1036	0.618406
Arl2bp	8:94666754-94674417	5.85243	4.08642	-0.518197	0.904249	0.1126	0.634881
Gm10320	13:98489347-98492001	100.945	70.4951	-0.517972	1.02119	0.07655	0.562069
Ipo7	7:109998375-110151202	8.09621	5.65432	-0.517893	0.877595	0.1535	0.69592
Baz2b	2:59899362-60209839	9.37628	6.54927	-0.517682	0.359963	0.5924	0.940988
Malt1	18:65430962-65478823	1.52124	1.06268	-0.517544	0.81652	0.1508	0.692507
Gm10288	3:146838810-146839347	704.91	492.57	-0.51711	1.07874	0.0937	0.598888
Smarca2	19:26605114-26823907	30.8286	21.548	-0.516712	0.81825	0.14195	0.679696
Asun	6:146549631-146599198	12.5011	8.73998	-0.516356	0.401795	0.5178	0.919966
Mical1	10:41476313-41490369	1.72382	1.20519	-0.516346	0.172486	0.59155	0.940769
Pfdn4	2:170482707-170519123	14.9985	10.4861	-0.51634	0.755084	0.1863	0.732486
Gm12848	4:115652388-115653480	2.90983	2.0347	-0.516116	0.597905	0.2914	0.813572
Macrod1	19:7056767-7198061	28.6719	20.0491	-0.5161	0.90926	0.1217	0.650133
Pkdcc	17:83215291-83225070	17.8463	12.4805	-0.515943	0.83314	0.1283	0.659662
Slc2a4rg-ps	2:181384249-181387586	3.37107	2.35755	-0.515919	0.931406	0.1226	0.651367
Lrrfip2	9:111118110-111225668	8.28078	5.79123	-0.515896	1.03266	0.07435	0.555358
9430008C03Rik,Gm23925,Gm26003,RP23-132A3.5	2:158353699-158361580	8.29855	5.80434	-0.515727	0.48083	0.2124	0.757896
1110019D14Rik	6:13871525-14044373	1.56873	1.09728	-0.515662	0.535566	0.34385	0.845912
Agxt	1:93135239-93145421	571.579	399.844	-0.515515	0.859291	0.13525	0.670361
Phf14	6:11907808-12081197	5.73717	4.01365	-0.515426	0.635316	0.173	0.718038
Gpd1l	9:114899340-114933987	10.5568	7.38692	-0.515131	1.04301	0.07	0.543485
Rc3h1	1:160906417-160974978	1.5109	1.05732	-0.514995	0.890796	0.1086	0.628492
1500017E21Rik	19:36554638-36705641	22.3426	15.6353	-0.514994	0.859079	0.1363	0.671466
Gm9294	7:42953599-42954388	110.844	77.5741	-0.514878	0.978851	0.09075	0.593436
Gm14859	X:102208401-102208758	3.88127	2.71668	-0.514687	0.39642	0.4956	0.91283
Rpl31-ps11	3:94604407-94604784	60.0755	42.052	-0.514603	0.890122	0.12335	0.652216
Gm14730	X:71197126-71198171	3.11119	2.17838	-0.51421	0.713217	0.2339	0.775714
Arhgap1	2:91649859-91672326	5.11065	3.5789	-0.51399	0.805434	0.40655	0.877971
Pigv	4:133660386-133672647	5.22862	3.66266	-0.513539	0.639776	0.26865	0.799325
Cyp4a30-ps	4:115343787-115363115	1.70199	1.19227	-0.513507	0.523961	0.35775	0.853477
Spag7	11:70663770-70669416	34.8096	24.3888	-0.513268	1.08515	0.0885	0.588901
1810044D09Rik	6:91440986-91441755	17.5098	12.2731	-0.512668	0.711989	0.21755	0.762127
Shfm1	6:6557293-6578658	50.4126	35.3376	-0.51258	1.02049	0.0695	0.541997
Paxip1	5:27740666-27791339	3.05125	2.13933	-0.512242	1.08802	0.09255	0.596736
Cacul1	19:60524695-60581023	8.81665	6.18259	-0.51202	1.35663	0.07365	0.553501
Gm5417	15:83375606-83464606	4.03847	2.83201	-0.511983	0.114377	0.79305	0.978354
Chmp2b	16:65539132-65562697	13.7386	9.63669	-0.511627	1.20768	0.0803	0.571062
Psmb10	8:105934332-105966115	32.9388	23.1043	-0.511625	0.108776	0.75455	0.973123
Tifa	3:127789871-127837492	8.55247	5.99904	-0.51161	0.538899	0.38515	0.868062
Slc44a1	4:53440412-53622478	10.3241	7.24188	-0.511585	0.791449	0.11685	0.642059
Gm28980	1:64454358-64454577	5.57751	3.91265	-0.511474	0.278985	0.61245	0.9456
Gtf2h1	7:46796102-46823800	12.7238	8.92676	-0.51132	0.834009	0.1553	0.697858
Echdc1	10:29313165-29362442	17.9397	12.5872	-0.511191	0.709138	0.2031	0.74907
Pcf11	7:92639738-92669933	4.40895	3.09363	-0.511133	0.428338	0.31135	0.826683
Ddah1	3:145758674-145894277	54.7384	38.4147	-0.510895	0.926944	0.08035	0.571072
Echdc3	2:6188464-6321611	93.7095	65.7644	-0.51089	0.946957	0.1001	0.6118
Pcmtd2	2:181837853-181857461	10.7668	7.55788	-0.510535	0.555288	0.2423	0.781729
Pwp2	10:78170909-78185149	3.12226	2.19222	-0.510201	1.31934	0.10095	0.613614
Zfp354b	11:50921822-50931633	1.79825	1.26273	-0.51004	0.486737	0.3735	0.861968
Gm14016	2:118594078-118594564	2.70467	1.89927	-0.51001	0.432851	0.45735	0.899678
Npb	11:120608476-120609093	1.50448	1.05656	-0.509885	0.328179	0.5286	0.923638
Zfp260	7:30094776-30107622	11.9994	8.4274	-0.509807	0.569906	0.3353	0.841385
Tlk2	11:105177725-105283959	7.37586	5.18045	-0.509732	0.713273	0.12845	0.659841
Btf3l4	4:108814294-108833614	11.3046	7.93999	-0.5097	0.593973	0.3156	0.829429
Vps13d	4:144972621-145195005	29.4191	20.6699	-0.509222	0.424701	0.44	0.893364
Rab13	3:90213694-90226385	5.14127	3.61247	-0.509137	0.800162	0.2106	0.756328
Nudt2	4:41465150-41480926	21.5524	15.1447	-0.509029	0.896631	0.1395	0.676227
Cbx5	15:103191543-103239816	2.91076	2.04555	-0.508907	0.579508	0.1386	0.674902
Cebpzos	17:78916499-78937070	25.0481	17.6051	-0.508706	0.402022	0.4959	0.912949
Ezh2	6:47530273-47595341	1.87095	1.31518	-0.508508	0.380698	0.40355	0.876633
Gm12312	11:70358137-70358781	6.03703	4.24455	-0.50823	0.704602	0.25735	0.791621
Flii	11:60699722-60727263	60.1652	42.3043	-0.508126	0.549153	0.34475	0.846305
Tfcp2	15:100502798-100552008	1.78867	1.258	-0.507748	0.788414	0.1744	0.719586
Zfp101	17:33360506-33394641	2.13109	1.49896	-0.507634	0.615525	0.20085	0.746922
Meiob	17:24804381-24839787	2.06552	1.45325	-0.507218	0.672645	0.25625	0.791174
Gm5471	15:44971793-44972135	17.4634	12.2927	-0.506534	0.619946	0.28355	0.808617
Anp32b-ps1	4:143389658-143390416	17.4473	12.2824	-0.50641	0.989456	0.10645	0.624162
Nop10	2:112261925-112263269	62.7496	44.1818	-0.506156	1.05553	0.07245	0.550376
Trim39	17:36258872-36272247	5.35071	3.76749	-0.506129	0.568655	0.2903	0.812876
Fhit	14:9550091-11162035	3.96009	2.7889	-0.505841	0.411071	0.4511	0.897689
Isoc2b	7:4844958-4866193	34.0187	23.9579	-0.505827	0.707796	0.19935	0.745532
Gm16373	X:116886880-116887183	84.3043	59.3817	-0.505588	0.862715	0.13245	0.665942
Tiparp	3:65507256-65555518	1.84234	1.29786	-0.505398	0.635482	0.18925	0.735288
Zfp386	12:116047723-116063360	5.74242	4.04896	-0.504109	0.771459	0.1604	0.703737
Gm12261	11:59577991-59578636	3.11411	2.19605	-0.503908	0.561225	0.36575	0.858154
Dpyd	3:118562128-119432918	98.479	69.451	-0.503819	0.9114	0.0907	0.593297
Ergic2	6:148006579-148212374	31.1642	22.0003	-0.502367	0.656008	0.18645	0.732627
Srrm2	17:23790531-23829109	184.298	130.15	-0.501861	0.375026	0.45435	0.898717
Foxn2	17:88440710-88490533	2.56403	1.81082	-0.501769	0.851422	0.11845	0.644579
Gm10247	16:8922056-8922389	35.3007	24.9468	-0.500841	0.753019	0.17755	0.723089
Arl5a	2:52397950-52424901	17.4181	12.3124	-0.500472	0.860949	0.07875	0.567522
Gm28661	1:24614884-24615565	17207.3	12166.6	-0.500103	0.585225	0.2974	0.817301
Acot13	13:24817947-24831517	149.184	105.491	-0.499968	1.00198	0.0846	0.58101
Nckap1	2:80500511-80581380	17.7984	12.5866	-0.499857	0.93489	0.0642	0.526696
Gm26318	X:102252521-102505359	18.3059	12.9456	-0.499845	1.55367	0.7258	0.968913
Nufip2	11:77686154-77741921	2.92878	2.07138	-0.499713	0.811169	0.1449	0.68411
mt-Cytb	MT:14144-15288	16496.3	11667.2	-0.499684	0.634169	0.32275	0.833756
Smg1	7:118131307-118243637	3.26776	2.31146	-0.4995	0.43011	0.16825	0.71303
RP23-235F22.1	3:49892525-50443614	1.70185	1.20423	-0.498987	0.216511	0.73585	0.970369
Abcb1a	5:8660076-8748575	5.59365	3.9584	-0.498872	0.784131	0.1293	0.661119
RP24-272N10.3	1:164462441-164463989	3.7745	2.67148	-0.498647	0.517513	0.4	0.87499
Cdk18	1:132112236-132142800	15.0907	10.6827	-0.498391	0.576743	0.29055	0.813008
2700089E24Rik	6:133105238-133110899	66.7834	47.2801	-0.498257	0.619847	0.29385	0.815234
Gm7589	9:59145676-59146210	58.5237	41.4389	-0.498037	0.975655	0.1024	0.616237
Rpl19-ps1	1:84990637-85285491	202.257	143.231	-0.497849	0.441667	0.2909	0.813255
Pds5b	5:150673738-150810690	2.7897	1.97562	-0.4978	0.693875	0.1977	0.743907
Atxn3	12:101918900-101958246	2.09245	1.482	-0.497646	0.849536	0.12285	0.651652
Zfp397	18:23954687-23964671	3.96737	2.81009	-0.497567	0.930709	0.12155	0.64989
Edem3	1:151755370-151822051	3.68187	2.6081	-0.497442	0.944198	0.0953	0.602286
Slc35b3	13:38932139-38966299	5.04204	3.57205	-0.497254	0.80352	0.16435	0.708621
Zfand5	19:21272277-21282289	25.4777	18.0525	-0.497033	0.536228	0.16605	0.710472
Ddx10	9:53098453-53248112	2.96237	2.09927	-0.496869	0.876224	0.13085	0.66369
Lrrc45	11:120713924-120721128	14.6963	10.4165	-0.496579	0.852869	0.24215	0.78165
Gm13244	4:145745745-145747401	5.69969	4.04011	-0.496488	0.791286	0.17515	0.720272
Maea	5:33335571-33373294	19.676	13.9476	-0.496419	1.05359	0.07275	0.551184
Rdm1	11:101627194-101636100	11.5923	8.21798	-0.496311	0.633632	0.2347	0.776281
Aspg	12:112106682-112127573	94.0005	66.6768	-0.495485	1.15718	0.0866	0.585043
Pld1	3:27938694-28133362	1.67292	1.18745	-0.494504	0.660954	0.20815	0.754187
Slc17a2	13:23806992-23825180	93.922	66.6694	-0.494437	0.779321	0.1723	0.717218
2610015P09Rik	16:43861406-43964314	4.74395	3.36816	-0.494129	0.394883	0.53995	0.926848
Snx9	17:5841327-5931033	8.42504	5.98293	-0.493831	1.00362	0.1107	0.63168
Rps12-ps16	X:125986965-125987364	21.9545	15.595	-0.493428	0.68966	0.22595	0.769683
Kctd12	14:102976580-102982637	5.04244	3.58208	-0.493324	0.467122	0.3008	0.819586
Rpl17	18:75000476-75003381	53.6461	38.111	-0.493267	0.982047	0.09205	0.595749
Gm13573	2:60251992-60284488	30.4705	21.6498	-0.493056	0.225762	0.76405	0.974504
Fndc3b	3:27416161-27711307	1.84315	1.30998	-0.492626	0.731528	0.17255	0.717449
Gm16335	13:100759673-100775899	20.0246	14.2355	-0.492281	0.584143	0.3045	0.822464
Txnip	3:96555764-96566801	235.321	167.326	-0.491966	0.483802	0.3902	0.870021
Wnk4	11:101260566-101277409	1.53909	1.09455	-0.49175	0.268559	0.7027	0.965155
Gm7665	18:16274647-16274944	2.066	1.46933	-0.491683	0.288305	0.6375	0.951801
Gm15318	17:31152751-31165053	9.9818	7.09934	-0.491616	0.843255	0.1468	0.686859
Gm15483	7:133686242-133881532	53.5951	38.1204	-0.491537	0.236569	0.7276	0.969238
Cyb5b	8:107150660-107187470	83.6861	59.5287	-0.491403	0.937618	0.10145	0.614549
Dlg1	16:31663442-31873356	11.3831	8.09983	-0.490927	0.649175	0.1034	0.618014
Zfp704	3:9403063-9610085	1.42536	1.01432	-0.490807	0.809384	0.1046	0.620302
Sult2a5	7:13623966-13670807	96.7131	68.836	-0.490547	0.755603	0.1833	0.729098
Kctd2	11:115420127-115431274	19.0684	13.5723	-0.490516	0.857174	0.12365	0.652571
Cela1	15:100674424-100687920	11.0049	7.83393	-0.49034	0.860143	0.1434	0.681943
Yipf4	17:74489492-74500277	11.4572	8.15707	-0.490133	1.03291	0.10195	0.615457
Usp3	9:66514636-66593142	16.002	11.3944	-0.489934	0.52647	0.30065	0.819453
Gm6563	19:23675843-23676712	23.6629	16.8636	-0.488711	0.930456	0.11095	0.632158
Rpl32	6:115805504-115808747	982.982	700.741	-0.488284	0.844872	0.1373	0.672959
RP24-283F19.2	3:49643706-49644127	6.47771	4.61787	-0.488258	0.484688	0.4026	0.876203
Sdpr	1:51218385-51333779	5.93018	4.22809	-0.48807	0.909711	0.126	0.656229
Gm12565	3:37599423-37600072	16.098	11.4841	-0.487244	0.852772	0.1559	0.698398
Ing2	8:47667177-47677055	42.3117	30.1971	-0.486647	0.85821	0.1546	0.697032
Vezt	10:93939164-94035817	8.87365	6.33305	-0.486627	0.462898	0.35565	0.852577
March7	2:60209886-60250676	8.77199	6.26073	-0.486573	0.725997	0.14	0.676934
Sh2d4a	8:68276566-68347694	3.18026	2.27025	-0.486295	0.786011	0.1765	0.721921
Dcaf4	12:83520465-83541988	1.5646	1.11723	-0.485867	0.634497	0.26315	0.795407
Cox7b	X:106015699-106022450	3568.74	2548.56	-0.48573	0.484079	0.4132	0.881276
Gsr	8:33652522-33698163	19.5695	13.978	-0.485451	0.951338	0.09775	0.607247
Rpl35a-ps5	5:33076037-33076370	79.9116	57.0859	-0.48527	0.853357	0.1401	0.677058
Pitpnc1	11:107207891-107470699	6.89406	4.925	-0.485231	0.956635	0.09475	0.601135
Stim2	5:53998416-54121057	12.037	8.5991	-0.485214	0.684495	0.2543	0.790242
Gm16391	17:76284414-76284861	2.58485	1.84663	-0.485188	0.450232	0.46905	0.904129
Oard1	17:48410013-48417266	19.3503	13.8266	-0.484906	0.927319	0.1194	0.64636
Cyp2b13	7:26061494-26096196	261.44	186.895	-0.484256	0.752149	0.18635	0.732528
Gm11605	1:63364719-63365365	135.386	96.8012	-0.483981	0.983794	0.09075	0.593436
Usp15	10:123113243-123196971	8.27732	5.91897	-0.483818	0.874274	0.107	0.625497
3010026O09Rik	11:50174443-50210827	6.70429	4.7951	-0.483523	0.0846557	0.748	0.97215
Zfp335os	2:164879303-164919953	3.03352	2.17029	-0.483103	0.182706	0.85155	0.984902
Gm17388	4:136355773-136359440	2.31334	1.6552	-0.482976	0.661696	0.30695	0.824047
Wdr33	18:31804056-31908987	5.35609	3.83229	-0.482974	0.737653	0.2713	0.800994
Gm6612	15:80948489-80970947	4.37678	3.13159	-0.482973	0.168169	0.83425	0.983259
Rpl27a	7:109519146-109522367	88.8482	63.5756	-0.48287	0.894594	0.10535	0.62188
Gm7117	X:105725127-105725514	28.9873	20.7428	-0.482805	0.762033	0.1803	0.725739
Bud13	9:46283007-46298783	9.13131	6.53433	-0.482782	0.662182	0.308	0.824674
Syne1	10:5020202-5069063	8.10902	5.80384	-0.48252	1.27336	0.11515	0.639564
Dynlt3	X:9654266-9663003	36.9531	26.4495	-0.482454	0.943892	0.084	0.579785
Zfp639	3:32510258-32520833	17.1717	12.2944	-0.482037	0.727152	0.1518	0.693995
Gm6285	X:104947784-104948282	39.604	28.3581	-0.481886	0.818634	0.1452	0.684581
Phf13	4:151989632-151996258	1.76729	1.26556	-0.481765	0.788129	0.1946	0.741056
Gm5814	17:47410362-47410740	9.84473	7.05034	-0.481658	0.619135	0.28475	0.809388
Ccdc50-ps	4:100567107-100568048	3.39875	2.43457	-0.481335	0.653628	0.3004	0.819305
Rnd3	2:51130437-51149111	6.64383	4.76022	-0.480987	0.848878	0.12845	0.659841
Eri1	8:35465264-35495533	2.75692	1.97541	-0.480908	0.867991	0.1362	0.6714
Gm6153	1:87476833-87597845	1.45762	1.04447	-0.480848	0.201375	0.85505	0.98528
Asnsd1,Gm28551	1:53297094-53352752	20.1102	14.4105	-0.480804	0.684743	0.3769	0.863802
Setd8	5:124439929-124462308	13.6863	9.80774	-0.480741	0.88065	0.09695	0.60576
Fam120a	13:48879218-48968017	28.1869	20.1992	-0.480722	0.966013	0.09225	0.59606
Mtch2	2:90847154-90866810	147.166	105.487	-0.480388	0.585182	0.34	0.84381
Tppp	13:74009406-74035753	2.83601	2.03287	-0.480343	0.341753	0.3175	0.830615
mt-Co2	MT:7012-7696	17366.9	12449.6	-0.480249	0.563687	0.3132	0.828061
Deb1	9:121710388-121712921	64.2018	46.0259	-0.480167	0.930359	0.10375	0.618756
Trim28	7:13024151-13031035	120.238	86.1998	-0.480138	0.773202	0.19895	0.745097
Rps27a	11:29545845-29578367	105.971	75.9746	-0.480085	0.917482	0.11785	0.643908
Prkaca	8:83972977-83996445	24.7498	17.7475	-0.479798	0.988474	0.10245	0.616259
Pdcd4	19:53892230-54033268	18.4089	13.2024	-0.479609	0.753894	0.22155	0.765583
Anxa4	6:86736839-86793584	18.3618	13.1689	-0.479575	0.964314	0.09615	0.603911
Fhod1	8:105326353-105347953	2.41114	1.72964	-0.479244	0.240711	0.63515	0.951187
Katna1	10:7725999-7763150	19.4213	13.9327	-0.47917	0.610576	0.2917	0.813752
Scfd1	12:51377579-51450096	4.14044	2.97044	-0.479109	0.833739	0.1669	0.711288
Enpep	3:129269174-129332720	26.024	18.6711	-0.479037	0.980806	0.085	0.581656
Hltf	3:20057810-20118490	2.87181	2.06068	-0.478839	0.727309	0.2132	0.758459
Gm5643	X:142297564-142298530	3.2925	2.36272	-0.478733	0.650682	0.2826	0.80796
Camsap1	2:25926837-25983282	2.68461	1.92689	-0.478437	0.442183	0.1919	0.738219
Dnajc9	14:20384637-20388910	2.59446	1.8623	-0.47835	1.16009	0.20155	0.747518
RP23-411B11.2	1:189207929-189402273	143.668	103.125	-0.478341	0.943971	0.0953	0.602286
Prdm9	17:15543078-15564354	2.43347	1.74728	-0.477903	0.435333	0.39995	0.874973
Zfp942	17:21926959-21962464	4.05127	2.90968	-0.477512	0.950871	0.176	0.721396
Gm15186	X:159526687-159593081	2.47176	1.7755	-0.477311	0.217779	0.77165	0.975443
Cdc14b	13:64192544-64274973	5.43694	3.90647	-0.476927	0.779745	0.19215	0.738449
Tprn	2:25262617-25269885	2.34945	1.68816	-0.476869	0.520126	0.2713	0.800994
Gm8802	5:7857107-7857847	5.71152	4.10411	-0.476803	0.655383	0.26405	0.795997
Uqcrb	13:66900616-66998401	312.857	224.846	-0.476562	0.673457	0.26045	0.7933
Arl14ep	2:106962526-106974424	3.21109	2.30821	-0.47629	0.723588	0.20245	0.748421
Gm6023	X:36213523-36214129	35.1281	25.2537	-0.476133	0.815012	0.14895	0.689877
Dnajb5	4:42949813-42959425	3.05427	2.19619	-0.475826	0.52088	0.29415	0.81538
Gm4963	5:137993046-137993424	159.384	114.635	-0.475458	0.931971	0.1062	0.623785
Copg2	6:30723546-30896794	8.85634	6.37038	-0.47533	0.412213	0.26295	0.795347
Rapgef6	11:54522846-54699285	2.14787	1.54549	-0.474843	0.601613	0.15985	0.703045
Brpf3	17:28801089-28838546	21.6527	15.5805	-0.474805	0.782642	0.12245	0.651171
Gm12460	4:51190106-51190463	12.6753	9.12105	-0.474746	0.527146	0.3467	0.847592
Tcf21	10:22817278-22820128	6.48348	4.6659	-0.474613	0.802862	0.2059	0.752155
Sin3b	8:72723287-72758203	36.7336	26.4412	-0.474311	0.739006	0.21735	0.762125
Abhd14a	9:106440050-106447678	12.9286	9.30764	-0.474083	0.779673	0.1912	0.737401
Nup153	13:46679904-46727940	8.83849	6.36338	-0.474007	0.392419	0.4966	0.913124
Atf4	15:80255183-80257540	78.0756	56.2339	-0.473432	0.925995	0.1022	0.615978
Gm7618	6:148900967-148901138	5.06036	3.64505	-0.473299	0.244046	0.69515	0.963855
Gab1	8:80764433-80880479	3.0474	2.19521	-0.473218	1.0158	0.1222	0.650844
Riok2	17:17374331-17395303	8.79177	6.33343	-0.473166	0.949709	0.10785	0.626994
Gm7160	1:105979349-105990282	6.25812	4.50824	-0.473164	0.630774	0.28085	0.806857
Wtap	17:12966795-12992546	12.4423	8.96332	-0.473147	1.01761	0.10355	0.618375
Ndufb11	X:20615325-20650901	243.711	175.591	-0.472953	0.837987	0.1575	0.700639
Uap1l1	2:25359888-25365682	13.5853	9.78858	-0.472877	0.556191	0.38905	0.869585
Gm12276	11:62281472-62514417	4.56975	3.29272	-0.472835	0.0771754	0.7952	0.978491
Strn	17:78649912-78737196	1.56925	1.13079	-0.472742	0.82282	0.12545	0.655388
Fam49b	15:63929096-64060448	3.11796	2.24694	-0.472639	0.671509	0.2447	0.783462
Pttg1	11:43420249-43426251	61.3398	44.2067	-0.472559	0.73483	0.1968	0.743072
Pan2	10:128303334-128321358	5.56389	4.01013	-0.472444	0.894276	0.11965	0.646783
Elp5	11:69968221-69990601	31.2046	22.4912	-0.472398	0.398711	0.50505	0.915856
Rorc	3:94372830-94397839	18.3873	13.253	-0.472394	0.863165	0.14615	0.686022
Rpl22	4:152325741-152334071	609.235	439.183	-0.472176	0.715108	0.2277	0.771155
Gm8815	17:36094967-36096805	4.03695	2.91026	-0.472118	0.533653	0.354	0.851557
Nnt	13:119335447-119408997	32.9061	23.7243	-0.471989	1.04171	0.1078	0.626968
Gm5766	16:4229229-4231206	3.47133	2.50335	-0.471625	0.518049	0.34815	0.84836
Sybu	15:44671858-44805827	2.83018	2.04125	-0.471444	0.770943	0.21665	0.761458
Ttll5	12:85824658-86079041	4.79701	3.45985	-0.471428	0.585886	0.25275	0.789064
1500012F01Rik	2:167035792-167065862	16.3904	11.8222	-0.47136	0.255145	0.6473	0.954016
Sde2	1:180851126-180868113	4.31795	3.1147	-0.471256	0.80194	0.50365	0.915428
Gm8185	13:76384534-77031810	39.1331	28.2289	-0.471216	0.905622	0.12845	0.659841
Gm17082	14:122107037-122159604	1.55181	1.11946	-0.471153	0.107512	0.7803	0.97649
Atp6v1g1	4:63544771-63550750	43.7666	31.5779	-0.470916	0.962528	0.10385	0.618996
Ppp4r1l-ps	2:173579319-173659640	7.75433	5.595	-0.470864	0.558116	0.2751	0.803675
H2-M3	17:37270219-37274484	2.06087	1.48706	-0.47079	0.635769	0.3104	0.826307
Firre	X:50555743-50635321	8.41475	6.07377	-0.470328	0.732772	0.263	0.795347
Ppp4c	7:126785906-126792471	19.6101	14.159	-0.469878	0.961199	0.10925	0.629409
Fzd6	15:39006279-39038186	1.81212	1.30869	-0.469549	0.729332	0.2102	0.75597
Myo18a	11:77763245-77865980	51.8175	37.4254	-0.469421	0.364647	0.50335	0.915405
Gm3788	3:86224679-86782692	451.248	326.013	-0.468989	0.330161	0.59	0.94044
Smc5	19:23206440-23273897	1.91994	1.38732	-0.468764	0.814706	0.1617	0.705487
1700010N08Rik	7:38791660-38860532	2.59985	1.8789	-0.468541	0.653813	0.598	0.942332
Ppcdc	9:57412667-57440114	7.0801	5.11787	-0.468225	0.882208	0.1186	0.644933
Fbxo8	8:56551089-56592393	26.2652	18.9871	-0.46813	1.15781	0.09795	0.607497
Slc38a6	12:73286778-73354049	2.88581	2.08647	-0.46791	0.310457	0.4691	0.904156
Gm3191	12:106459149-106459495	6.34849	4.59033	-0.467816	0.450767	0.43325	0.890555
A530017D24Rik	11:61864567-61868058	2.34846	1.69846	-0.467486	0.604722	0.2931	0.814675
Hist1h2ba	13:23933772-23934156	3.8894	2.81305	-0.467415	0.398686	0.46775	0.903708
Slc8b1	5:120511167-120534024	27.2892	19.7424	-0.467031	0.575054	0.23665	0.777535
Phf3	1:30802338-30873921	17.3214	12.5322	-0.466917	0.771241	0.12495	0.654593
Gm11263	4:79327707-79328456	58.703	42.497	-0.466075	0.910626	0.1099	0.630455
Cml1	6:85910153-85915687	263.755	190.976	-0.465807	0.889538	0.13125	0.664119
Pnpla6	8:3515383-3544266	4.31579	3.12549	-0.465545	0.901998	0.14705	0.687243
Srsf5	12:80945503-80950507	115.446	83.6279	-0.465159	0.489256	0.3759	0.863289
Ypel2	11:86936424-86993707	4.34616	3.14838	-0.465135	0.824124	0.1541	0.696638
Sdhb	4:140961202-140979193	151.34	109.636	-0.465075	0.896227	0.1296	0.661618
D030056L22Rik	19:18713192-18718428	3.36126	2.43542	-0.464831	0.711589	0.21405	0.759193
Vma21-ps	4:52496938-52497244	19.3647	14.032	-0.464716	0.503457	0.37715	0.863871
Gm13202	4:148068030-148068492	295.676	214.258	-0.464668	0.928335	0.1119	0.63383
Gm12751	4:34354042-34354423	94.2583	68.3054	-0.46462	0.89184	0.11635	0.641203
Osbpl8	10:111164801-111297247	3.02025	2.18967	-0.463954	0.879834	0.12995	0.662343
1110002L01Rik	12:3365131-3506852	3.3126	2.40181	-0.46384	0.3671	0.4781	0.906881
Gm13731	2:87333801-87333997	41.9731	30.433	-0.46383	0.460273	0.4414	0.893908
2610021A01Rik	7:41599260-41628533	1.88846	1.36926	-0.463809	0.795117	0.20755	0.75374
Cd59b	2:104069848-104091187	3.67098	2.66173	-0.463802	0.375585	0.47785	0.906774
Col14a1	15:55307749-55520803	4.38506	3.17959	-0.463755	0.723229	0.20475	0.750794
Rbm12b1	4:12140263-12146731	3.74995	2.71963	-0.463457	0.723549	0.17475	0.71993
Gm15787	5:110135839-110176504	1.52049	1.10294	-0.463186	0.181456	0.59995	0.942814
Gm5963	16:35541144-35664732	686.41	497.915	-0.463171	0.817734	0.1858	0.731998
Smad1	8:79338394-79399518	4.95944	3.59823	-0.462889	0.809083	0.1536	0.696009
Rpl22l1	3:28805435-28813985	116.213	84.3196	-0.462826	0.474438	0.25615	0.791174
Cnot1	8:95719450-95821728	8.98623	6.52037	-0.462763	0.969225	0.1051	0.621467
Grb2	11:115644044-115708597	30.0656	21.816	-0.462726	0.594141	0.2026	0.748522
Hmgb1-ps7	7:42011791-42058981	3.66415	2.65885	-0.462677	0.482716	0.442	0.894159
Fahd2a	2:127436214-127444565	31.3499	22.7504	-0.462573	0.540872	0.35585	0.85271
Grem2	1:174833784-174921819	3.36494	2.44194	-0.462556	0.794681	0.1728	0.717784
Crls1	2:132845998-132866785	46.2364	33.5537	-0.462554	0.899903	0.12045	0.647782
Shoc2	19:53892230-54033268	6.80366	4.93776	-0.462454	0.518174	0.3808	0.865914
Papd4	13:93147399-93192283	2.16832	1.5737	-0.46241	0.636931	0.2604	0.793251
Ddx3x	X:13280969-13294052	31.1498	22.6089	-0.462329	0.830469	0.09915	0.609895
Rpl11	4:136028264-136053428	224.866	163.286	-0.461668	0.749886	0.2046	0.750665
Msl2	9:101074100-101104800	4.71434	3.42418	-0.461296	1.26159	0.13015	0.662647
Sept7	9:25252438-25308571	9.55475	6.94041	-0.461197	0.910209	0.1149	0.639194
Ccbl2	3:142701050-142744910	405.446	294.575	-0.460876	0.541699	0.335	0.841198
Glrx3	7:137437647-137468594	28.5688	20.7571	-0.46084	0.932066	0.10735	0.626178
Smarce1	11:99209046-99231017	17.5946	12.789	-0.460226	0.712668	0.2182	0.76277
Arglu1	8:8666576-8690537	12.9805	9.43565	-0.46015	1.09597	0.15875	0.701793
Rnf43	11:87662721-87735539	18.7628	13.6398	-0.460056	0.479685	0.2828	0.808086
mt-Nd3	MT:9458-9806	7125.31	5180.14	-0.459962	0.74269	0.17885	0.724606
Gm7334	17:50698524-50699880	3.13641	2.2803	-0.459888	0.634188	0.276	0.804093
Crtap	9:114368302-114390675	9.61342	6.98942	-0.459877	0.567551	0.36985	0.860321
Bcl2a1b,Gm29094,Mthfs	9:89199208-89377713	54.8816	39.9022	-0.459854	0.558518	0.326	0.835699
Rps19-ps7	2:140073031-140073469	46.1985	33.5929	-0.459688	0.859265	0.1486	0.689078
Rpl36-ps3	12:12911985-12912369	205.217	149.267	-0.459254	0.92331	0.12475	0.654327
Zcrb1	15:93386096-93398334	38.3902	27.9275	-0.459053	0.783223	0.1845	0.730495
Rpl30-ps8	12:99047229-99047577	102.342	74.4516	-0.459023	0.855137	0.13725	0.672873
Idh2	7:80094845-80115392	149.406	108.691	-0.459007	0.779013	0.19755	0.743763
Pan3	5:147430160-147548502	6.71115	4.88439	-0.45838	0.395249	0.418	0.883461
Uchl3	14:101653966-101696124	10.5586	7.68549	-0.458204	0.763364	0.2035	0.749455
Rpl36a	X:134585653-134588062	42.4171	30.8756	-0.458177	0.760522	0.19625	0.742393
Gm5776	7:54412157-54412478	45.0335	32.7837	-0.45802	0.696259	0.22145	0.765515
Ap3s1-ps2	8:94405210-94405792	16.8908	12.2973	-0.457895	0.753527	0.19445	0.740909
Uri1	7:37960001-38019542	10.1536	7.39231	-0.457891	1.04787	0.09215	0.595848
Zfand4	6:116264221-116330298	3.40902	2.48298	-0.457284	0.728207	0.22155	0.765583
Gm15675	1:130388536-130437914	1.39232	1.01435	-0.456935	0.60389	0.25745	0.791645
Sap30	8:57482706-57487860	1.91344	1.39402	-0.456914	0.544309	0.3365	0.842015
Rps6-ps3	9:53684109-53706232	61.3627	44.7082	-0.456821	0.888012	0.1174	0.642948
Gm5903	7:130162450-133124354	2.08691	1.52068	-0.456652	0.0534175	0.77	0.975216
Gm17837	1:18250979-18265138	3.92852	2.86358	-0.456162	0.576	0.3061	0.823483
Plcxd2	16:45746242-46010218	8.68296	6.32947	-0.456103	0.616727	0.296	0.816579
Gm12428	3:98821037-98821764	6.99116	5.09728	-0.455803	0.624564	0.29955	0.818682
Cyb5r3	15:83153493-83172592	163.15	118.983	-0.455447	0.806723	0.15045	0.692017
Gm13443	2:35340408-35340963	522.642	381.483	-0.454203	0.919275	0.1095	0.629759
Casp7	19:56397128-56442344	7.16197	5.22867	-0.453912	0.827283	0.15015	0.691567
Emc2	15:43477228-43527777	12.675	9.2583	-0.45317	0.893245	0.1515	0.693509
Telo2	17:25099569-25115967	8.5754	6.26394	-0.453132	0.399	0.5078	0.916894
Fam76a	4:132899212-132922558	7.53205	5.50284	-0.452868	0.884113	0.1147	0.638826
Crlf2	5:109554710-109558993	6.48357	4.73856	-0.45234	0.729355	0.22245	0.766334
Rps27a-ps1	1:52522238-52522701	7.19582	5.26027	-0.452022	0.516045	0.3755	0.863076
Auh	13:52835118-52929681	28.6215	20.9256	-0.451829	0.72829	0.1719	0.716922
2210013O21Rik	X:153723589-153741920	3.22605	2.35866	-0.451802	0.472688	0.3609	0.855189
Sall1	8:89027247-89044162	12.4309	9.0906	-0.451484	1.20061	0.136	0.671133
Anks4b	7:120173857-120183716	28.0723	20.5329	-0.451208	0.90382	0.1219	0.650474
Apaf1	10:90989310-91082770	2.43954	1.7844	-0.451176	0.270141	0.6046	0.943743
Prox1os	1:190118034-190217276	23.1357	16.9236	-0.451087	0.228918	0.71965	0.968099
Gm3150	15:72589620-73061204	671.239	491.017	-0.451052	0.627696	0.27245	0.801622
Gm13829	5:115279665-115296972	4.51997	3.30703	-0.450775	0	1	1
RP23-436F15.2	3:10232179-10232311	47.8407	35.0032	-0.450753	0.290061	0.61535	0.946474
Zfp12	5:143235162-143248834	3.4584	2.53104	-0.450373	0.675866	0.1739	0.71894
Sfr1	19:47731755-47735588	40.557	29.6875	-0.450094	1.00307	0.1218	0.65034
Gm14633	X:56447887-56448366	146.185	107.008	-0.450082	0.916693	0.1125	0.634759
C430014B12Rik	1:82586920-82752394	2.95605	2.1639	-0.450039	0.220777	0.80495	0.980016
Tubgcp3	8:12614276-12679229	9.2126	6.74441	-0.449915	0.605792	0.2465	0.784824
Rpl30-ps11	X:12456885-12457230	18.3043	13.4055	-0.449356	0.574793	0.3038	0.821997
Gm10224	6:122698413-122699028	13.3827	9.80324	-0.449034	0.775851	0.23015	0.77299
Fkbp7	2:76663043-76673116	2.80367	2.05389	-0.44896	0.464039	0.391	0.870461
Ankle2	5:110231003-110256651	3.704	2.71493	-0.44817	0.912541	0.12575	0.655981
Brk1	6:113604771-113616948	44.4285	32.5726	-0.447828	1.21436	0.11415	0.637812
Eapp	12:54670339-54695897	22.8324	16.7396	-0.447824	0.640134	0.28345	0.808542
Pla2g12a	3:129878621-129895821	36.9305	27.0777	-0.447707	0.888259	0.12905	0.660765
Lmnb1	18:56707812-56753424	1.48204	1.08688	-0.447393	0.395144	0.45295	0.898184
Gm12141	11:41498736-41500458	111.785	81.9902	-0.447197	0.915844	0.1144	0.638309
Edf1	2:25557846-25562082	350.246	256.897	-0.447178	0.761695	0.2093	0.754999
Bin1	18:32359056-32435736	6.87434	5.04304	-0.446929	0.867695	0.1626	0.706618
Kpna4	3:69067148-69127113	5.93813	4.35659	-0.44681	0.602651	0.26545	0.797045
Zfand1	3:10339952-10351317	13.1722	9.66481	-0.446685	0.636944	0.3661	0.858337
Ercc3	18:32240299-32270151	9.0381	6.63156	-0.446671	0.54402	0.3509	0.849838
Galm	17:80127470-80185101	76.8608	56.4089	-0.446326	0.829642	0.1252	0.654964
Mak16	8:31150315-31168724	7.19083	5.27935	-0.445797	0.587009	0.3325	0.839844
Gm13340	2:22227502-22618252	1568.92	1151.95	-0.445695	0.484351	0.4145	0.881989
Cwc22	2:77879752-77946375	4.41293	3.24014	-0.445679	0.620656	0.21635	0.761172
Vps16	2:130417246-130444269	41.1616	30.2234	-0.445634	0.511973	0.4613	0.901273
Zcchc6	13:59769964-59823147	15.0498	11.0525	-0.445365	0.942489	0.1137	0.636921
Ak4	4:101419276-101466995	16.1157	11.8366	-0.44521	0.588955	0.2455	0.784105
Zbtb26,Zbtb6	2:37425499-37443171	1.53709	1.12899	-0.445169	0.714495	0.2173	0.762118
Gm13215	4:132148412-132148884	24.6639	18.1157	-0.445155	0.752865	0.2152	0.760176
Nxt2	X:142226769-142239692	13.9146	10.2214	-0.445	0.912681	0.1206	0.648074
Hspa2	12:76404175-76406934	2.88421	2.11895	-0.444828	0.783827	0.19645	0.74266
Zfp160	17:21008940-21028852	2.68547	1.97325	-0.4446	0.815301	0.2115	0.757022
Cap1	4:122836241-122886056	53.3786	39.2246	-0.444504	0.801836	0.152	0.694211
Epb4.1l5	1:119545036-119649000	22.792	16.7487	-0.444478	0.604633	0.2817	0.807437
Col12a1	9:79598990-79718831	1.64143	1.20641	-0.444235	0.264498	0.6327	0.950502
Mrfap1	5:36794866-36796772	63.7241	46.8436	-0.443988	1.09886	0.11095	0.632158
Scaf4	16:90228956-90284425	2.6132	1.92124	-0.44378	1.0071	0.17405	0.719105
Ahnak	19:8989283-9076919	2.49412	1.8338	-0.443694	0.378799	0.51765	0.919919
Rnaseh2b	14:62276230-62372992	2.8087	2.06518	-0.443631	0.390167	0.45115	0.897702
Dclre1a	19:56529166-56548222	8.43816	6.20466	-0.443577	0.478654	0.2936	0.815068
Rdh19	10:127849927-127861176	7.79069	5.72893	-0.443485	0.837108	0.14645	0.686281
Gtpbp4	13:8972070-8996017	6.47231	4.75961	-0.443437	0.832781	0.14265	0.680791
Met	6:17463799-17573980	10.9685	8.06783	-0.44311	0.842473	0.09885	0.609337
Xylb	9:119169454-119393797	65.2269	47.9788	-0.443069	0.333864	0.5681	0.934891
Tmem5	10:122078113-122097371	12.5244	9.21394	-0.442852	0.719069	0.1884	0.734343
Dhdh	7:45472955-45526268	40.7818	30.0056	-0.442694	0.510967	0.37775	0.864284
Ift74	4:94614490-94693229	1.63889	1.20591	-0.442606	0.471324	0.41695	0.883169
Gm13392	2:23908440-23908590	183.423	134.988	-0.44234	0.519975	0.37405	0.862276
Gm9386	17:80938333-80938714	2.70753	1.9928	-0.44218	0.361009	0.5823	0.938483
Gm14681	X:66778441-66778852	120.989	89.0585	-0.442052	0.876025	0.12715	0.657943
Chuk	19:44073334-44107480	42.9061	31.5871	-0.441847	0.572852	0.26705	0.798197
Slc30a5	13:100802648-100833427	7.99663	5.88707	-0.441843	0.878864	0.1281	0.659325
Gnb2l1	11:48800331-48817353	608.004	447.62	-0.441807	0.570567	0.2739	0.802844
Acot3	12:84038378-84059565	221.513	163.203	-0.44072	0.601533	0.3009	0.819623
Gstp2	19:4040284-4042236	135.939	100.157	-0.440703	0.838787	0.13005	0.662472
Reps1	10:18055860-18125155	6.52508	4.80879	-0.440322	0.552086	0.28555	0.809914
Eif4g2	7:111070567-111083030	305.931	225.463	-0.440312	0.398168	0.5258	0.922871
Adora1	1:134193447-134235431	13.6621	10.07	-0.440119	0.728177	0.16535	0.709747
Huwe1	X:151800806-151935417	19.8715	14.6469	-0.440109	0.163448	0.38895	0.869544
Gm12430	4:47453631-47454953	3.16843	2.33555	-0.440006	0.695253	0.2828	0.808086
Pum2	12:8674133-8752581	6.92946	5.10814	-0.439946	0.669938	0.13125	0.664119
Ccdc137	11:120458114-120464358	5.93486	4.37498	-0.439938	0.574951	0.205	0.751083
Nfyb	10:82748700-82764144	15.238	11.2332	-0.439898	0.550431	0.2871	0.811021
Gm11492,Sept4	11:87566652-87590539	14.5626	10.7383	-0.439501	0.624071	0.29045	0.812941
Gm28285,Matr3	18:35553370-35593835	25.5933	18.8735	-0.439405	0.783179	0.1075	0.626504
Tnpo1	13:98839018-98926384	5.52815	4.07749	-0.439115	0.677751	0.2715	0.801045
Rpl4	9:64173386-64178562	470.021	346.738	-0.438877	0.793277	0.1608	0.704464
Raver1	9:21074167-21128393	9.04468	6.67277	-0.438785	0.607784	0.271	0.800787
Traf3ip1	1:91494646-91529307	2.4084	1.77692	-0.438692	0.673651	0.25585	0.79114
Fam120aos	13:48968286-48972031	2.23914	1.65224	-0.438526	0.681611	0.29005	0.812749
Il1a	2:129297369-129309972	1.62521	1.19931	-0.438427	0.545899	0.4329	0.890351
Nthl1	17:24632681-24638838	7.55219	5.5737	-0.438261	0.763964	0.22685	0.770447
Zfp956	6:47943170-47965300	2.28176	1.68419	-0.438087	0.471591	0.2855	0.809877
Larp4	15:99970073-100016351	5.20412	3.84125	-0.438078	1.04671	0.13	0.662426
2410127L17Rik	19:18670779-18704788	3.11143	2.29675	-0.437985	0.704905	0.24245	0.781861
Erdr1	Y:90784737-90816464	23.2457	17.1607	-0.437852	0.777813	0.24805	0.785912
Top2b	14:16365178-16430787	5.9265	4.37754	-0.437062	0.450014	0.3166	0.830067
Aifm1	X:48474943-48513563	37.1841	27.4675	-0.436957	0.77998	0.1652	0.70956
Vps4a	8:107031221-107056689	13.7661	10.1697	-0.436839	0.331234	0.5063	0.916299
Grap	11:61653264-61720826	2.79214	2.06288	-0.436714	0.511773	0.37375	0.862145
F13b	1:139501701-139523752	78.9639	58.3444	-0.436598	0.563077	0.314	0.828619
Parp1	1:180568923-180601254	12.3928	9.15739	-0.436493	0.491609	0.2057	0.751896
Cyp2c29	19:39229253-39330713	635.157	469.497	-0.435997	0.749166	0.2161	0.761018
Dnajc24	2:105966708-106406151	13.1852	9.74698	-0.435898	0.558832	0.28425	0.809096
Rdx	9:52047149-52088737	37.3625	27.6202	-0.435866	0.899432	0.133	0.666791
Kcnn2	18:45268859-45896509	22.2198	16.4288	-0.435617	0.826659	0.17205	0.717042
Scyl3	1:163929099-163994796	8.65541	6.39983	-0.435567	0.554091	0.2522	0.788708
Gm6776	19:42788946-43388311	5.31094	3.92821	-0.435096	0.624247	0.28975	0.812606
Ppp1r10	17:35916433-35932283	10.4219	7.70864	-0.435072	0.666195	0.1497	0.69098
Gm12669	4:91805546-91806555	115.848	85.6902	-0.435033	0.852458	0.1467	0.686606
Bclaf1	10:20312468-20344613	19.3453	14.3101	-0.434954	0.515538	0.4334	0.890594
Mtmr2	9:13748409-13806481	5.89657	4.3621	-0.434853	0.709527	0.1545	0.697019
Gm12821	4:112537060-112537660	3.0239	2.23715	-0.43475	0.43267	0.4407	0.893635
B3gnt2,Commd1,Gm28048,RP23-242C19.8	11:22758598-22982382	190.873	141.238	-0.43449	0.683715	0.263	0.795347
Mcee	7:64392644-64412121	76.1722	56.3753	-0.434202	0.886655	0.12165	0.650024
Mipep	14:60768133-60903610	8.89826	6.58636	-0.434041	0.797051	0.17115	0.71615
Gm15782	6:149353381-149353826	33.2353	24.6011	-0.433991	0.716227	0.2214	0.765515
Ftl2,Mir692-2	4:125490699-125714173	3259.3	2412.77	-0.433869	0.173082	0.4781	0.906881
Zbtb41	1:139422382-139453007	1.44651	1.07097	-0.433653	0.778568	0.17895	0.724609
Ppp1r14b	19:6975047-6977324	29.2459	21.6532	-0.43365	0.835362	0.14285	0.681153
Gm9105	7:109279222-109444893	11.0039	8.1475	-0.433581	0.870802	0.16385	0.707947
Tbp	17:15499887-15528379	6.25282	4.63017	-0.433441	0.302328	0.5162	0.919468
Fbxo3	2:103957985-104063240	29.2911	21.6927	-0.433252	0.815812	0.1639	0.70804
Klhl20	1:161088374-161131511	1.55332	1.15047	-0.433134	0.823889	0.26505	0.796711
Rbm15	3:107326109-107333289	4.45202	3.29744	-0.433113	0.812893	0.18365	0.729478
Timeless	10:128225837-128252941	1.62536	1.20386	-0.433089	0.272774	0.51185	0.918348
Kidins220	12:24974931-25059697	9.14176	6.77114	-0.433074	0.868474	0.135	0.669897
Phf11d	14:59347406-59365470	1.83241	1.35726	-0.433043	0.600837	0.35275	0.850702
Gpx8	13:113035110-113091195	1.60802	1.19185	-0.43208	0.394946	0.4639	0.902276
Tlcd2	11:75461538-75470899	139.577	103.454	-0.432073	0.766096	0.1963	0.74247
Sun1	5:139200636-139249840	4.329	3.20915	-0.431842	0.488179	0.1666	0.71114
Ccpg1,Dyx1c1,Dyx1c1Ccpg1	9:72958784-73042779	31.1274	23.0758	-0.431803	0.709189	0.1771	0.722488
Usp33	3:152346477-152393612	6.66517	4.94119	-0.431782	0.828996	0.13565	0.670765
1700080G11Rik	4:127531621-127532885	29.8311	22.1157	-0.431744	0.68477	0.24945	0.786822
Aldh1b1	4:45799021-45804604	60.5878	44.9288	-0.431387	0.632582	0.2449	0.783592
Gm12247	11:58097103-58097773	6.17487	4.57966	-0.431169	0.553048	0.33	0.83825
Srp14	2:118475849-118479711	74.2168	55.047	-0.43108	0.785273	0.1822	0.727868
Gm13798	2:95677716-95677855	12.141	9.00637	-0.430868	1.20853	0.6847	0.962276
Rpl31-ps10	4:137395298-137395676	14.4435	10.7148	-0.430819	0.543402	0.3348	0.841144
Lsm2	17:34981861-34985891	25.4241	18.8613	-0.43077	0.610292	0.26085	0.793701
Nlrc5	8:94472762-94527272	9.85411	7.31093	-0.430672	0.50821	0.37125	0.860912
Magoh	4:107879754-107887424	12.452	9.24005	-0.430402	0.619009	0.30675	0.824
Rps12-ps18	X:124855728-124856127	21.1067	15.6645	-0.430201	0.59214	0.29405	0.81534
Pts	9:50521617-50528641	37.3291	27.7075	-0.43002	0.862855	0.13605	0.671184
Nus1	10:52417546-52440192	11.9574	8.87675	-0.429804	0.665057	0.31985	0.832061
Dld	12:31331563-31351437	33.3831	24.7827	-0.42978	0.921188	0.1199	0.647074
Ghr	15:3317759-3583492	192.951	143.242	-0.429779	0.570579	0.33405	0.840835
Gtf3c3	1:54396003-54438971	1.95003	1.44767	-0.429758	0.471887	0.26305	0.795356
Pde8a	7:81213595-81334533	11.7	8.6868	-0.429617	0.674443	0.2817	0.807437
Trim23	13:104178796-104203372	2.39771	1.78026	-0.429567	0.49102	0.3109	0.826576
Gm6851	7:40190934-40191324	47.1866	35.0368	-0.429505	0.752132	0.18735	0.733111
Snrnp70	7:45376461-45395692	59.9484	44.5262	-0.429067	1.10194	0.13835	0.674487
Traf2	2:25517981-25546940	7.70496	5.7229	-0.429041	0.807766	0.20235	0.748311
Rint1	5:23787710-23831897	6.18409	4.59454	-0.428642	0.480098	0.3004	0.819305
Tmem184c	8:77595981-77610698	6.26014	4.65121	-0.428589	0.562573	0.26185	0.79446
Zcchc7	4:44755876-44932215	7.49435	5.56843	-0.428534	0.369477	0.43445	0.89111
Sulf2	2:165992635-166155663	9.52982	7.08285	-0.428119	0.490613	0.36775	0.859217
Smc6	12:11265885-11319785	2.65196	1.97141	-0.427827	0.852588	0.16805	0.71279
Grik5	7:25009852-25072369	2.49095	1.85193	-0.427665	0.724435	0.2138	0.75892
Traf5	1:191997204-192151026	5.23658	3.89361	-0.427515	0.0880367	0.7214	0.968278
Ftcd	10:76575647-76590338	149.009	110.8	-0.427433	0.791808	0.1717	0.716738
Thnsl2	6:71128165-71144346	30.3833	22.5945	-0.427306	0.831115	0.1579	0.701054
Chac2	11:30954394-31102704	16.5319	12.2949	-0.427191	0.736114	0.2224	0.766334
Rabep1	11:70844777-70969973	11.1773	8.31426	-0.426911	0.604632	0.2312	0.773651
Fubp1	3:152210457-152236830	2.75796	2.05186	-0.426669	0.746691	0.1974	0.743544
Inpp5f	7:128611327-128696425	8.58655	6.38943	-0.426391	0.68393	0.17985	0.725367
Epm2aip1	9:111271928-111279097	3.60246	2.68106	-0.426182	0.761929	0.1958	0.741994
Nup54	5:92415539-92435219	6.59028	4.90516	-0.426041	0.665368	0.15935	0.702413
Sik1	17:31844247-31855792	3.89255	2.8981	-0.425609	1.04005	0.1639	0.70804
Col1a2	6:4504813-4541543	1.42411	1.06041	-0.425439	0.363172	0.3134	0.828179
Kmt2d	15:98831668-98871204	8.408	6.26099	-0.425372	0.361603	0.5042	0.915575
Cyp3a59	5:146079257-146113285	44.0616	32.8128	-0.425264	0.847523	0.13565	0.670765
[truncated: 10,532 more rows]

## Sheet: KO_AL_vs_WT_DR Muscle
gene	locus	WT_DR Muscle FPKM	KO_AL Muscle FPKM	log2(fold_change)	test_stat	p_value	q_value
Gm16418	1:166431704-166431875	3253.74	3253.57	-7.43926e-05	0.000151696	0.9989	0.999597
Serpina1c	12:103894925-103904887	199.783	1.93058	-6.69325	7.35938	0.01455	0.27599
Serpinc1	1:160978584-161038539	159.074	1.55633	-6.6754	3.55132	0.00185	0.088338
Serpina1d	12:103728155-103830373	139.265	1.41539	-6.62049	5.57093	0.03595	0.420337
Fabp1	6:71199826-71205023	184.037	2.04454	-6.49207	6.66673	5e-05	0.00661738
Apoa1	9:46228579-46230466	652.747	7.74678	-6.39678	12.6208	5e-05	0.00661738
Serpina1b	12:103728155-103830373	166.871	2.29568	-6.18367	2.57509	5e-05	0.00661738
Ahsg	16:22892041-22899438	164.767	2.27005	-6.18156	7.84658	5e-05	0.00661738
Alb	5:90460888-90476603	987.374	13.6358	-6.17812	9.56554	5e-05	0.00661738
Serpina1a	12:103853588-103863562	175.254	2.4251	-6.17526	8.4776	5e-05	0.00661738
Hpd	5:123047372-123250131	87.4597	1.29745	-6.07487	1.07286	0.01775	0.30516
Apoc2,Apoc4	7:19671578-19681423	80.7098	1.343	-5.90921	4.60791	5e-05	0.00661738
Fga	3:83026075-83033627	83.6003	1.44267	-5.85669	7.71399	0.0403	0.440595
Hamp	7:30942370-30944017	160.116	2.85585	-5.80905	4.6273	0.0011	0.0635893
Serpina3k,Serpina3m	12:104338485-104394257	48.0747	1.16184	-5.3708	6.444	5e-05	0.00661738
Apoc3	9:46232932-46235636	162.907	4.51172	-5.17423	4.80954	5e-05	0.00661738
Aldob	4:49535994-49549546	43.1858	1.24343	-5.11816	3.97122	0.0423	0.44914
Apoa2	1:171225053-171226379	471.096	16.9242	-4.79887	6.86402	0.0375	0.427555
Slc27a5	7:12988345-12998192	24.7873	1.05596	-4.55298	2.92059	5e-05	0.00661738
Uox	3:146597076-146632305	22.5233	1.07283	-4.39192	2.71261	0.12455	0.654014
Ttr	18:20558073-20674324	76.3769	3.87595	-4.30052	3.68387	0.0215	0.334343
Ttc36	9:44799399-44802951	19.0813	1.20302	-3.98743	3.82788	0.0002	0.0195433
Snord118	11:69073426-69073561	51.6485	3.44848	-3.90469	10.1106	0.234	0.775777
Apoc1	7:19689483-19692658	254.217	17.7378	-3.84116	5.28666	5e-05	0.00661738
Ddx5	11:106780354-106789185	1107.63	77.3307	-3.8403	0.471276	0.0478	0.472361
Gm27454,Gm27492,Gm27543,Gm27695,Gm28032,Hoxa11os	6:52242105-52249799	33.5345	2.43415	-3.78416	1.85925	0.01465	0.276746
Gnmt	17:46442447-46831413	93.9802	7.06281	-3.73404	0.795364	0.1297	0.661784
Gm5424	10:62071014-62072609	80.1391	6.7814	-3.56285	6.58509	5e-05	0.00661738
Ass1	2:31470206-31520672	16.3463	1.39369	-3.55199	3.6115	5e-05	0.00661738
Hmgcs2	3:98280434-98310738	38.9606	3.55228	-3.4552	6.01141	5e-05	0.00661738
RP24-372I24.3	3:65968901-65969151	12.3688	1.25662	-3.29909	2.55856	0.088	0.587936
Gm11438	11:83681537-83681726	9.25871	1.05734	-3.13038	2.08983	0.2465	0.784824
Gm15181	1:75514106-75514283	10.9926	1.46291	-2.90962	2.18391	0.24345	0.782667
Vtn	11:78499090-78502324	102.044	13.6	-2.9075	4.22628	5e-05	0.00661738
Pcbd1	10:61089342-61094328	8.17492	1.15379	-2.82482	2.3946	0.0044	0.14648
Cbs	17:31612622-31637199	7.75487	1.22795	-2.65885	1.73961	0.0011	0.0635893
Slc25a47	12:108851128-108856814	17.2014	2.75642	-2.64166	3.49548	5e-05	0.00661738
Gm4479	14:56787516-56787687	9.95028	1.69944	-2.54968	3.95937	0.2781	0.805529
Ugt1a1,Ugt1a10,Ugt1a2,Ugt1a5,Ugt1a6a,Ugt1a6b,Ugt1a7c,Ugt1a8,Ugt1a9	1:88055387-88220002	15.9482	2.72421	-2.54949	3.19252	5e-05	0.00661738
C8g	2:25498650-25505471	12.7154	2.27553	-2.4823	0.762301	0.045	0.460808
Gm3625	12:4592825-4592927	102.183	18.6697	-2.45238	20.4477	0.3117	0.826964
Slc27a2	2:126521201-126588243	28.3248	5.20154	-2.44505	1.19244	0.0062	0.176861
Reep6	10:80329952-80336441	27.8931	5.44013	-2.35819	4.32712	5e-05	0.00661738
Gm12732	11:77639853-77640033	4.8519	1.00135	-2.2766	2.25611	0.32005	0.832134
Dbp	7:45705087-45720835	125.077	25.843	-2.27497	2.2776	0.0033	0.124193
Apoe	7:19696108-19699166	1514.06	317.367	-2.25419	5.88849	5e-05	0.00661738
Gm8648	X:157667564-157667785	5.2539	1.1016	-2.25378	1.55241	0.1654	0.709773
Gm22486	6:71880647-71908762	18.998	4.01704	-2.24164	2.00969	0.4313	0.889806
Rab11fip5	6:85334962-85374634	67.3659	14.4282	-2.22312	4.98246	5e-05	0.00661738
Kcng4	8:119623853-119635680	7.56822	1.65211	-2.19564	5.77154	5e-05	0.00661738
Gm3852	1:46011756-46012020	5.00476	1.09557	-2.19162	1.39362	0.14485	0.68409
1500012F01Rik	2:167035792-167065862	40.0302	8.82953	-2.18068	1.42599	0.0204	0.326305
Gm22579	9:15316675-15316808	16.1231	3.6868	-2.12869	5.14214	0.32105	0.832689
Cxcl10	5:92331826-92414628	4.78246	1.09419	-2.12788	0.346535	0.1543	0.696809
Mup9	4:60418045-60421952	7.74038	1.78068	-2.11998	1.36914	0.00825	0.206217
Gm16391	17:76284414-76284861	5.01364	1.15394	-2.11929	1.49504	0.06225	0.521103
B230312C02Rik	2:180370490-180385885	5.49795	1.28554	-2.09652	2.61351	0.0002	0.0195433
Gm11007	2:175643977-175653860	5.19865	1.24067	-2.06702	1.60722	0.1348	0.669616
Hrsp12	15:34484020-34495255	22.1618	5.30653	-2.06223	2.88844	5e-05	0.00661738
n-R5s33	16:32914099-33127695	35.388	8.54455	-2.05018	1.49136	0.436	0.891678
Mup16	4:61515591-61519531	4.37196	1.06056	-2.04346	1.36971	0.01295	0.260419
Gm11266	4:82290172-82705750	11.2753	2.77457	-2.02283	1.01582	0.33895	0.843271
Gm22743	11:104231389-104332090	16.1125	4.0414	-1.99525	0.953461	0.4652	0.902633
RP24-550N13.2	3:49603560-49603876	7.63038	1.91763	-1.99243	1.2739	0.03495	0.415541
2310065F04Rik	11:67112460-67120080	35.6599	8.9663	-1.99172	3.26955	5e-05	0.00661738
Gm23820	3:103074013-103099714	7.80516	1.97867	-1.9799	0.116638	0.3371	0.84234
Apbb2	5:66298860-66618828	137.1	35.9946	-1.92938	0.617466	0.21445	0.759513
Sardh	2:27188392-27248337	11.6989	3.08357	-1.9237	1.74273	0.00315	0.120556
Acaa1b	9:119102477-119157093	54.8023	14.5336	-1.91485	4.0238	5e-05	0.00661738
Gm8649	6:6248658-6378675	4.16545	1.11328	-1.90365	0.83312	0.48285	0.908725
Cth	3:157894247-157925077	11.916	3.21572	-1.88968	1.68327	0.0117	0.247193
Tnrc6b	15:80711318-80941086	10.4717	2.83472	-1.88522	2.55234	0.0007	0.0476587
Snrpn,Snurf	7:59937370-60140219	171.451	46.5292	-1.88159	1.69989	0.02365	0.349158
Rbp4	19:38116619-38125321	90.2883	24.6201	-1.8747	3.39515	5e-05	0.00661738
Gm27684	7:115172272-115172352	500.585	136.555	-1.87413	1.91649	0.142	0.679796
Dhcr24	4:106561037-106589113	4.86583	1.34987	-1.84987	2.77982	5e-05	0.00661738
Cldn3	5:134986213-135001350	7.30715	2.03564	-1.84383	2.07584	0.00705	0.189449
Gm11966	11:5818496-5818583	368.744	103.531	-1.83255	1.58806	0.13775	0.673535
2310015D24Rik	16:13514130-13521107	6.69975	1.88334	-1.83082	2.87797	5e-05	0.00661738
Gm23952	13:50679536-50679645	27.5282	7.92875	-1.79575	1.20525	0.3668	0.858682
Adamts2	11:50599297-50807573	7.83603	2.26324	-1.79173	0.742802	0.1037	0.618676
Nop58	1:59684970-59719044	42.8438	12.4344	-1.78475	2.94078	0.0004	0.0322049
Itgb6	2:60598291-60722643	6.19268	1.80165	-1.78125	2.99481	0.0002	0.0195433
Gm18699	1:89048973-89049216	5.21308	1.53131	-1.76737	1.13207	0.23805	0.778599
C2,Cfb,Gm20547	17:34856373-34898265	21.8557	6.50122	-1.74923	1.95623	0.0012	0.0670609
Gm26384	17:21284102-21284212	23.634	7.0342	-1.74841	7.29958	0.39645	0.873453
Snhg7,Snora17,Snora43	2:26637176-26640244	9.68755	2.91146	-1.73439	1.6201	0.0067	0.184351
Pemt	11:59970613-60046489	18.857	5.67658	-1.732	1.53666	0.0109	0.238372
CAAA01116243.1	1:182976275-182976429	8.40761	2.57093	-1.70941	3.30733	0.38005	0.865423
Gm15446	5:109922648-109943936	17.7387	5.43045	-1.70775	1.65581	0.00875	0.212945
Gm20490	2:173020497-173034734	8.30756	2.55355	-1.70192	0.180765	0.38665	0.868471
Gm29138	1:55370015-55370363	3.25205	1.01306	-1.68263	0.966813	0.1867	0.732748
Mup10	4:60578259-60582199	10.6417	3.32637	-1.6777	1.79664	0.0019	0.0898278
Ky	9:102505749-102546239	83.3371	26.0537	-1.67747	2.99007	5e-05	0.00661738
Nrep	18:33437018-33464029	31.4297	9.92054	-1.66364	4.82157	5e-05	0.00661738
Dkk3	7:112116018-112159057	13.6773	4.33249	-1.65852	3.01628	5e-05	0.00661738
Gm20425,Srprb,Trf	9:103188031-103230444	463.834	147.51	-1.6528	1.56416	0.0272	0.372417
Marc1	1:184786766-184811313	6.39908	2.03576	-1.65229	2.03126	0.0012	0.0670609
Per3	4:150914561-151861876	13.4173	4.31031	-1.63823	3.20919	0.00345	0.127343
Pbld1	10:63061581-63077962	3.84791	1.24368	-1.62946	1.89079	0.00385	0.135556
Wfdc21	11:83746939-83752642	24.8074	8.04839	-1.624	1.45622	0.01565	0.286011
Mup13	4:61224306-61228286	6.15499	1.99771	-1.62341	1.43952	0.015	0.28005
Gm27517,Gm27624,Gm27640,Gm27937,Tug1	11:3639784-3690477	65.0568	21.1705	-1.61965	0.676448	0.14545	0.684884
Gm27256	7:14837773-14838029	14.5371	4.7472	-1.61459	1.22031	0.07585	0.559974
Mup11	4:60658465-60662411	12.2354	4.00152	-1.61244	1.08771	0.0171	0.299287
Gm15151	X:151758016-151758193	88.9207	29.1617	-1.60845	1.09083	0.03995	0.439087
Mir7091	X:74273216-74290151	101.153	33.3331	-1.60151	3.33547	0.554	0.930967
Gm18709	8:119910359-124345724	7.5377	2.51999	-1.58071	0.00625125	0.3499	0.849204
Gm14122	2:150398255-150399399	3.52376	1.17828	-1.58043	1.48472	0.01855	0.311584
Gm14327	2:177897095-177925613	3.31412	1.10831	-1.58026	1.10885	0.2543	0.790242
Gm14541	X:36823736-36874111	44.4066	14.8714	-1.57823	0.790542	0.55655	0.931598
Gm24300	13:50118005-50118114	24.8248	8.36195	-1.56987	5.83471	0.1604	0.703737
Pbld1	10:63024314-63058813	4.23336	1.45445	-1.54133	1.1588	0.056	0.500508
Gsta3	1:21240588-21271593	7.00765	2.42645	-1.53008	1.74723	0.0015	0.0773753
Chpf2	5:24586740-24602012	17.0724	5.97612	-1.51439	0.830916	0.0545	0.495769
Tex38	4:115779833-115781018	2.85381	1.00893	-1.50006	1.18067	0.071	0.546321
Rpl21-ps7	17:83288545-83289028	4.20908	1.5021	-1.48653	1.13263	0.08695	0.585952
Mup2	4:60135931-60154289	6.59614	2.35852	-1.48374	1.39332	0.00625	0.177499
Mup8	4:60218620-60222599	4.13614	1.49234	-1.47071	1.17481	0.023	0.344571
Nrn1	13:36725624-36734477	3.81147	1.38247	-1.4631	1.38366	0.0413	0.445271
Snora73b	4:132331918-132353686	12.5328	4.56103	-1.45828	0.579271	0.55945	0.932636
Map3k7cl	16:87553329-87595336	15.3274	5.57915	-1.45799	2.38869	0.0002	0.0195433
Gm7820	X:132888107-132889159	3.32571	1.2147	-1.45307	1.16795	0.069	0.540632
Eva1a	6:82041042-82093099	2.75571	1.00761	-1.45149	1.29149	0.01165	0.246696
Gm14399	2:175129492-175142012	6.79439	2.48702	-1.44992	0.620746	0.21195	0.757483
Rps27l	9:66946085-66949516	97.8306	35.9029	-1.44619	2.32354	0.00035	0.0292274
Fam78a	2:31974435-32084857	14.1545	5.23823	-1.43411	1.66002	0.00525	0.161451
Mup1	4:60498011-60501960	4.0509	1.51189	-1.42189	1.14488	0.02395	0.351153
Mup7	4:60066468-60070475	6.77481	2.53041	-1.42081	1.32218	0.01255	0.256205
Ptx3	3:66053557-66296837	3.44083	1.29081	-1.41448	2.16841	0.00475	0.15265
Recql	6:142345653-142387087	7.49683	2.81681	-1.41222	0.688204	0.08965	0.591374
Mylk4	13:32700826-32783954	385.044	145.322	-1.40577	1.50649	0.02135	0.333331
Spata6	4:111719983-111829184	3.30929	1.2546	-1.3993	0.881202	0.03725	0.426597
Rpl19-ps4	14:13777813-13778440	355.903	134.947	-1.39909	0.893831	0.3604	0.854918
Gm7191	8:97565602-97566592	2.85056	1.08186	-1.39773	1.0862	0.07435	0.555358
Gm5621	9:105560117-105560762	64.0809	24.4387	-1.39073	2.50806	5e-05	0.00661738
Gdap1	1:17145361-17164271	5.65045	2.164	-1.38467	2.66381	0.00025	0.023074
Fam154b	7:82632959-82648528	2.8827	1.10406	-1.38459	0.814498	0.18555	0.731694
Gm15065	X:75705408-75705681	3.24786	1.25607	-1.37057	1.09657	0.3053	0.823004
Rpl21-ps14	8:4861168-4861651	6.24775	2.42009	-1.36828	1.05284	0.08455	0.580923
RP23-436F15.2	3:10232179-10232311	96.5547	37.4188	-1.36758	0.904468	0.1228	0.651508
2310047D07Rik	5:149231331-149247682	22.9606	8.90959	-1.36573	1.99763	0.0015	0.0773753
Crlf1	8:70493157-70504081	7.13577	2.77555	-1.36229	0.940155	0.1275	0.658483
Gm5356	8:89186945-89187560	4.02073	1.56844	-1.35813	1.23985	0.04465	0.45923
Gm12318	11:70762106-70762379	75.1444	29.3352	-1.35703	13.064	0.5816	0.938301
Fam19a3	3:104767405-104786018	5.90609	2.30956	-1.35459	0.496688	0.20545	0.751513
Mup19	4:61778323-61782269	5.58296	2.18811	-1.35135	1.09078	0.205	0.751083
Rpl31-ps18	19:51792225-51792602	9.30244	3.6538	-1.34821	1.03637	0.0951	0.601901
Mup18	4:61670176-61674136	6.74162	2.66054	-1.34138	1.27087	0.01885	0.313892
Igkv4-91	6:68768567-68769103	4.08483	1.61518	-1.33858	1.02831	0.3012	0.819747
Mical2	7:112225855-112355194	83.3468	33.0148	-1.33602	1.57577	0.0067	0.184351
BC049352	9:45172725-45250020	7.17728	2.85158	-1.33168	1.32703	0.02845	0.380161
Gm26913	13:84690209-84690941	2.94877	1.17207	-1.33105	1.00448	0.0992	0.609971
Hpn	7:31098724-31115290	30.1559	12.0094	-1.32828	1.57199	0.0171	0.299287
Tmem233	5:116038754-116083244	130.594	52.1301	-1.3249	2.66452	5e-05	0.00661738
Gamt	10:80258150-80261012	23.0506	9.23136	-1.32019	1.76553	0.0019	0.0898278
Gm14420	2:177464732-177478129	7.29519	2.96386	-1.29947	1.36719	0.02125	0.332439
Cmtm8	9:114789344-114844152	2.99186	1.218	-1.29653	1.26402	0.0484	0.474516
Smt3h2-ps	X:7752129-7752414	4.11298	1.67458	-1.29638	0.914515	0.23875	0.778982
Agt	8:124556533-124569706	40.4352	16.4886	-1.29415	2.65238	5e-05	0.00661738
Gm19774	18:38601533-39389425	27.1197	11.0621	-1.29372	1.61601	0.5652	0.934173
Gm6322	X:139676086-139677489	2.60275	1.06502	-1.28915	1.08684	0.069	0.540632
Adh1	3:138260990-138307022	53.129	21.7407	-1.2891	2.52567	0.0002	0.0195433
Rnf170-ps	7:26061494-26096196	13.0076	5.33546	-1.28567	0.994777	0.0479	0.472635
Qprt	7:127107113-127122226	2.92105	1.20116	-1.28206	1.35592	0.0178	0.305513
Col18a1	10:77032240-77166548	4.69666	1.94346	-1.27301	1.65826	0.01025	0.230765
Gm4953	1:159168159-159168642	2.80535	1.16297	-1.27037	0.899814	0.12185	0.650402
Gm7741	3:35863876-35864865	5.5878	2.343	-1.25393	1.32534	0.03155	0.39727
Golga7b	19:42247573-42270348	4.58624	1.9348	-1.24513	2.31994	0.00195	0.0912885
Mss51	14:20482863-20496901	60.7114	25.6361	-1.24379	2.55567	0.0003	0.0262458
Mup12	4:60737382-60741326	4.46329	1.88565	-1.24305	1.02124	0.0486	0.475177
Ralgapa1	12:55602928-55821580	9.60977	4.0603	-1.24291	2.17434	0.00015	0.0157786
Gm14480	X:10696931-10697364	2.39362	1.01137	-1.24288	0.752822	0.2217	0.765754
Depdc7	2:104721783-104742878	2.79736	1.18221	-1.24258	1.42821	0.0238	0.350166
Gm9364	3:122861883-122862676	2.46108	1.04031	-1.24227	0.962525	0.1172	0.64258
Mup14	4:61300022-61304000	8.87826	3.7597	-1.23966	1.15398	0.02625	0.366794
Gm13827	5:115011136-115098790	16.6431	7.04928	-1.23937	0.585378	0.4514	0.897763
Gm14650	X:58630186-58632738	2.7206	1.15256	-1.23908	1.05048	0.0843	0.580383
Gm4468	15:99734880-99875428	109.145	46.2398	-1.23904	0.771389	0.21595	0.761018
Gm24727	8:33652522-33698163	8.50911	3.61267	-1.23594	0.911591	0.5448	0.928294
Lrp2bp	8:45975527-46029477	5.89888	2.50486	-1.23571	1.43258	0.0202	0.324596
RP23-99I7.2	3:86224679-86782692	10.6267	4.5189	-1.23365	0.388671	0.6042	0.943652
Pld2	11:70540022-70558110	5.89849	2.51447	-1.23009	1.05203	0.0136	0.266881
Plcd4	1:74409375-74588246	42.644	18.2163	-1.22711	1.28701	0.02385	0.350611
Psme2	14:55587440-55591113	10.3983	4.44192	-1.22709	1.2264	0.0766	0.562181
Gm20432	5:25271797-25498783	35.2845	15.088	-1.22563	0.353771	0.6355	0.951252
Gm13222	4:145579035-145579173	9.14397	3.92412	-1.22045	3.46348	0.52315	0.921546
Ang,Rnase4	14:51091076-51106151	94.3343	40.5661	-1.21751	2.04621	0.00085	0.0538205
Mup15	4:61435789-61439743	4.96212	2.13403	-1.21737	1.07617	0.0363	0.422283
Tnfaip2	12:111442468-111455018	35.639	15.3459	-1.21561	1.15236	0.03115	0.395063
Tpmt	13:47025169-47084613	3.09913	1.34	-1.20963	0.405185	0.4857	0.909829
Foxo6	4:120267078-120287349	4.17719	1.80801	-1.20813	1.78346	0.01875	0.313305
Ciart	3:95871521-95892005	8.29865	3.59564	-1.20663	1.37119	0.04965	0.478835
Vrk2	11:26386134-26593999	4.46556	1.93496	-1.20654	1.09841	0.0243	0.353572
Slc35d1	4:103170648-103215164	2.81075	1.2199	-1.20419	1.70073	0.00285	0.113516
Man2c1os	9:57072039-57142722	2.7995	1.21786	-1.20083	0.321531	0.3634	0.856755
Gm9826	1:7177738-7179037	23.486	10.2625	-1.19443	2.02977	0.0008	0.051952
Myl1	1:66924294-66945404	8863.75	3875.33	-1.1936	1.42528	0.013	0.260918
Mpped2	2:106693268-106868356	6.20658	2.71556	-1.19255	0.685386	0.29015	0.812749
Gm20519	9:21526175-21545333	2.7265	1.1941	-1.19113	0.524651	0.45655	0.899443
Gm18343	5:25271797-25498783	6.84608	3.00115	-1.18976	0.456267	0.5041	0.915559
Gm11694	11:115493023-115493182	53.9099	23.6965	-1.18588	0.787555	0.1747	0.719915
Gm9847	12:14494560-14495157	8.35506	3.67548	-1.18472	1.14071	0.0607	0.516268
D1Ertd622e	1:97606317-97662074	8.35772	3.67965	-1.18354	1.76397	0.01065	0.235489
Polr2k	15:36174009-36177010	7.96603	3.52217	-1.1774	1.17767	0.04565	0.46368
Hist1h4b	13:23756202-23757620	4.72909	2.09554	-1.17424	0.841711	0.1648	0.709142
2310015K22Rik	1:80225043-80228792	6.26737	2.78017	-1.17268	1.52472	0.01225	0.253032
Gm17218	17:26554253-26656931	2.55684	1.13743	-1.16858	0.245122	0.6144	0.946235
RP23-433P9.4	1:184736976-184739520	6.84663	3.04762	-1.16771	0.844049	0.13955	0.676294
Gm12300	11:67200051-67237573	36.267	16.1545	-1.16672	0.137564	0.2358	0.777092
Wfdc17	11:83703990-83706268	3.1296	1.39603	-1.16465	0.818338	0.14985	0.691057
Gm27018	6:6248658-6378675	24.7716	11.0804	-1.16067	0.51809	0.3349	0.841169
Gm12038	11:20847475-20847682	21.2834	9.52159	-1.16045	0.925314	0.2043	0.750362
Gm11893	4:25541790-25542281	4.22122	1.89246	-1.1574	0.862179	0.1527	0.695032
Igfbp5	1:72857931-72874884	45.6668	20.4794	-1.15697	3.93972	0.0003	0.0262458
Foxo6os	4:120291349-120303892	10.17	4.56997	-1.15406	1.90431	0.00105	0.0617525
9130204K15Rik	11:79781978-79872394	2.4241	1.09011	-1.15297	0.723225	0.10955	0.629833
Gm24017	13:50262393-50262502	55.0565	24.8171	-1.14958	0.586865	0.33325	0.840377
Lrtm1	14:28904942-29721864	11.6774	5.26878	-1.14817	2.66661	0.0007	0.0476587
Gm15707	6:145315612-145316608	7.80713	3.52426	-1.14747	1.38244	0.0277	0.375333
Gm29164	9:83925144-84124240	2.71242	1.22722	-1.14418	0.620728	0.4246	0.886569
Obsl1	1:75479309-75506452	49.8656	22.6044	-1.14144	1.31363	0.03365	0.408783
Ppp1r2-ps6	17:6253902-6254523	14.088	6.40554	-1.13708	1.43092	0.0258	0.364014
RP23-58N8.6	9:85687359-85750429	2.22272	1.01113	-1.13635	0.364649	0.6514	0.954923
Gm12833	4:115480799-115481276	2.39357	1.09003	-1.13479	0.776438	0.15965	0.702813
Gm5393	X:112302195-112302467	11.6655	5.31756	-1.13342	0.953199	0.2357	0.777058
Tceal5	X:136200947-136203876	16.396	7.47824	-1.13258	1.73967	0.0023	0.100221
Gm28980	1:64454358-64454577	9.15414	4.1783	-1.13151	0.666302	0.243	0.782308
Lnp	2:74520290-74584544	14.8429	6.77951	-1.13052	1.75406	0.0741	0.554658
Lrrc28	7:67513410-67645268	8.44058	3.85814	-1.12944	1.29012	0.01655	0.294164
Gm15756	6:90486426-90600203	6.71401	3.0711	-1.12842	0.567412	0.31825	0.831212
Hoxa11	6:52242105-52249799	2.42188	1.10785	-1.12836	0.980529	0.1151	0.639515
Gm3235	8:91313531-91668439	4.3227	1.98132	-1.12547	0.251666	0.56715	0.934545
Arl5b	2:14995130-15082456	5.05167	2.31837	-1.12365	1.00213	0.08585	0.583445
Gm28688	9:96809755-96810023	6.10347	2.80109	-1.12364	0.661734	0.2566	0.791313
Gm14472	2:153407461-153529971	36.7583	16.8968	-1.12132	0.910481	0.12775	0.658825
Gm8927	6:22703435-22704416	6.66199	3.06873	-1.11831	1.30323	0.02595	0.364915
Ak3l2-ps	2:72633935-72634607	13.08	6.03205	-1.11664	1.32968	0.0288	0.382097
Junos,n-R5s189	4:95049033-95167318	10.6024	4.89942	-1.11371	0.291637	0.3311	0.838928
Gm12263	11:59474283-59475765	22.9781	10.6594	-1.10814	2.14507	0.00035	0.0292274
Vamp7-ps	2:174046618-174047273	10.222	4.75829	-1.10316	1.71812	0.01655	0.294164
Eif4a1	11:69666935-69672423	93.5757	43.6003	-1.1018	0.802569	0.13135	0.664282
Gm13360	2:19909779-20810713	36.6369	17.0936	-1.09984	0.699012	0.21235	0.757859
Gm7784	1:23479538-23480527	2.74101	1.27903	-1.09966	1.11749	0.08415	0.580068
Mettl11b	1:163702255-163725232	11.3933	5.34616	-1.0916	2.12959	0.0024	0.102681
Gm8292	1:55248657-55363469	90.7778	42.6496	-1.08981	1.78765	0.0034	0.126349
Gm11229	4:71285941-71286378	2.47625	1.164	-1.08907	0.698368	0.2374	0.778051
Tceal7	X:136213971-136226100	54.7205	25.7572	-1.0871	1.68274	0.0056	0.167206
Elovl6	3:129532385-129638495	11.5355	5.43731	-1.08512	2.94476	0.00525	0.161451
Atp1b4	X:38316183-38336769	4.50008	2.12115	-1.08511	2.14698	0.0023	0.100221
Gm17837	1:18250979-18265138	2.54901	1.20175	-1.0848	1.13161	0.0574	0.505087
Gm7075	10:63421400-63421739	2.60293	1.22786	-1.08399	0.668042	0.31875	0.831474
Rasgrp3	17:75435904-75529043	11.7253	5.53923	-1.08187	2.20756	0.0003	0.0262458
Zcchc11	4:108459425-108559421	19.1728	9.06877	-1.08008	1.01757	0.1335	0.66743
Fam83d	2:158768092-158786637	4.15295	1.96658	-1.07845	1.53472	0.03505	0.41608
Crot	5:8966032-8997427	16.9682	8.04008	-1.07755	1.92218	0.00085	0.0538205
Lrsam1	2:32876113-32965345	7.19883	3.41603	-1.07544	0.421624	0.10955	0.629833
Gm12722	4:105374453-105374946	6.67469	3.16796	-1.07515	1.01654	0.086	0.583783
Gm28610	1:151852402-152090125	11.3233	5.37835	-1.07406	0.282836	0.66785	0.958857
Gm8529	18:50220070-50220815	2.67094	1.26898	-1.07368	0.931133	0.10515	0.621585
Gm27300,Meg3,Mir1906-1,Mir770	12:109541000-109571726	67.9472	32.3376	-1.0712	0.644404	0.11695	0.642173
Gm20746,Gm26445	10:130592135-130592705	76.6917	36.5031	-1.07105	0.600995	0.39835	0.874316
Lin9	1:180641149-180690694	3.84622	1.83501	-1.06765	1.42456	0.0329	0.404578
Hist2h2ac	3:96220360-96220880	2.46883	1.18029	-1.06468	0.562577	0.31685	0.830187
Zfp433	10:81718918-81721468	2.49693	1.19575	-1.06224	1.11893	0.0554	0.498565
Sh3bgr	16:96200469-96228933	1246.01	596.902	-1.06175	1.89785	0.00235	0.101533
Glce	9:62057247-62122655	3.88688	1.86412	-1.06011	0.797894	0.11225	0.634241
Gm4899	8:81197626-81198214	5.0416	2.41901	-1.05946	0.939462	0.11175	0.633568
Ehhadh	16:21761286-21787844	30.3755	14.6291	-1.05407	2.25921	0.00125	0.0688842
Mafa	15:75746842-75747922	55.8029	26.918	-1.05177	2.09009	0.0014	0.0741463
Tceal6	X:135208686-135210687	3.16502	1.52811	-1.05046	1.13857	0.05865	0.509293
Gm15934	10:45178097-45318452	2.78914	1.34986	-1.04701	0.246876	0.6278	0.949537
Prkag3	1:74738921-74749221	62.2082	30.153	-1.0448	1.71843	0.0016	0.0806254
Rpl32-ps	3:69716939-69717445	3.61758	1.75479	-1.04373	0.80226	0.1983	0.744548
Gm14470	X:10680963-10681429	6.81013	3.30492	-1.04307	0.886368	0.1051	0.621467
Gemin2	12:59013392-59028470	3.05297	1.48417	-1.04056	1.07022	0.07715	0.563367
Gm10059	5:33739672-33782817	32.9094	15.999	-1.04052	0.158892	0.62305	0.948302
Gm13937	2:110196888-110256131	4.82697	2.35874	-1.0331	1.08216	0.07015	0.543958
Gm14897	X:114857886-114858093	27.5211	13.4667	-1.03114	0.674458	0.24485	0.783547
Ift122	6:115853469-115926699	4.62858	2.26502	-1.03104	0.885868	0.0582	0.50768
Gm7329	1:65095226-65095436	493.194	241.414	-1.03065	1.74256	0.0035	0.128299
Carns1	19:4164323-4175479	17.8804	8.75469	-1.03025	2.10185	0.0005	0.0377141
Gm11796	4:5644089-6108223	2.49606	1.22219	-1.03018	0.559823	0.4755	0.906172
Gm14287	2:157528868-157528985	58.2787	28.5477	-1.02959	5.65201	0.2562	0.791174
Sfrp4	13:19623174-19632821	3.3513	1.64223	-1.02906	1.23799	0.0324	0.40177
Gm6954	X:80666312-80666537	10.8172	5.30688	-1.02739	0.623935	0.25645	0.79121
Lurap1	4:116123839-116159849	4.24902	2.08476	-1.02725	0.351763	0.5624	0.93337
Cpeb2	5:43151688-43289724	5.87638	2.89407	-1.02183	2.04009	0.00585	0.171524
Gm12201	11:51099010-51113200	2.35952	1.16291	-1.02075	0.993588	0.11355	0.636741
Gm15502	5:137892931-137921619	332.957	164.142	-1.02039	1.24431	0.0212	0.332186
RP23-240E15.2	3:87968185-87968606	2.16026	1.06631	-1.01858	0.728825	0.23525	0.776708
Ppapdc3	2:32095527-32110820	140.27	69.3342	-1.01657	1.63047	0.00715	0.190925
Paip1	13:119428600-119458218	43.5416	21.5243	-1.01643	1.42603	0.0514	0.484835
Gm16053	7:97400002-97407802	12.9431	6.4055	-1.01479	0.0976207	0.59955	0.942706
Josd2	7:44467979-44471652	152.454	75.5701	-1.01249	2.36957	0.0028	0.112305
Mre11a	9:14784653-14837123	5.80048	2.87582	-1.0122	0.654212	0.1693	0.714021
Tfrc	16:32608919-32632794	18.123	8.99701	-1.01031	1.21372	0.03325	0.406641
Gm2950	9:99220047-99220567	10.505	5.22464	-1.00768	1.03957	0.0667	0.534005
Nabp1	1:51465861-51478425	10.6325	5.29098	-1.00687	2.30763	0.01685	0.297088
Gm10064	5:122697201-122697600	2.58309	1.28611	-1.00609	0.66025	0.25505	0.79072
Relt	7:100845847-100863446	7.62615	3.80854	-1.00172	0.779141	0.06475	0.528301
Gm21974,Prss53,Vkorc1	7:127865169-127895617	57.0428	28.5057	-1.0008	1.05574	0.0685	0.539219
Itpa	2:130667609-130681614	10.424	5.21289	-0.999749	2.01485	0.0037	0.132516
Gm29323	10:21743866-21747006	4.09087	2.04786	-0.99829	0.638996	0.30385	0.822043
1500015A07Rik	18:61726389-61786702	3.19162	1.59885	-0.997258	1.1301	0.3152	0.829225
Ccdc88c	12:100912699-101028983	11.064	5.548	-0.995838	2.4046	0.00115	0.0653844
Gm14853	X:105797614-105929397	6.94234	3.4816	-0.995673	0.433698	0.61065	0.945206
Tatdn1	15:58889228-58933730	2.96069	1.48577	-0.994729	0.401013	0.52215	0.921247
Fmod	1:134037253-134048277	19.0938	9.58515	-0.994231	1.71025	0.00415	0.14139
Gm15408	5:148874331-149015813	2.36692	1.1929	-0.988537	0.646404	0.29155	0.813619
Gm7363	7:3983786-3984187	11.0722	5.5861	-0.987036	0.884392	0.1359	0.670995
Gm2735	9:59750895-59928866	3.77333	1.90408	-0.986743	0.204601	0.7017	0.964998
Tnfrsf23	7:143665808-143685872	2.47234	1.248	-0.986259	2.56333	0.03685	0.424704
Scin	12:40059768-40134228	2.15529	1.08822	-0.985905	1.23293	0.0395	0.436834
Acly	11:100476352-100528000	16.7035	8.43791	-0.985189	1.43841	0.0099	0.226469
Gm4819	14:56250068-56251077	4.29631	2.17075	-0.984908	1.05148	0.07825	0.566141
Gm5405	16:32591300-32591909	2.60377	1.31599	-0.984458	0.690395	0.20245	0.748421
Tnfsf13os	11:69682137-69696098	4.88042	2.46768	-0.983847	0.535366	0.48915	0.910958
Gm4737	16:46152996-46155077	20.12	10.1836	-0.982386	1.90042	0.00115	0.0653844
Gm14794	X:88749451-88749643	113.671	57.5349	-0.982359	0.917184	0.1246	0.654129
H2-Q10	17:35470088-35474563	56.2583	28.4986	-0.981177	2.31204	0.0043	0.144676
Mir6240	5:114851947-114852064	30.2339	15.3225	-0.980511	5.38836	0.3857	0.868262
Gm7867	1:93305963-93373489	3.63924	1.84839	-0.977369	0.32239	0.5908	0.940522
9930104L06Rik	4:124918464-124944656	9.7111	4.93579	-0.976354	0.926492	0.09625	0.604223
Smco1	16:32271467-32274779	32.9723	16.7834	-0.974215	6.384	0.00075	0.0498428
Lrrc38	4:143349756-143371032	25.7288	13.0996	-0.973862	1.98033	0.00095	0.0579755
Gm12319	11:70654740-70656493	119.786	61.0151	-0.973226	1.55	0.01045	0.233043
Hlf	11:90336535-90390895	7.67124	3.91452	-0.970624	0.389275	0.50795	0.916918
A330023F24Rik,Mir29b-2,Mir29c	1:194938818-195038908	6.85522	3.49824	-0.970573	0.923012	0.0671	0.535185
Hist1h3i	13:21782959-21783370	2.27201	1.16014	-0.96967	0.60873	0.35695	0.853135
Smyd2	1:189879934-189922363	272.006	138.946	-0.969114	1.65665	0.01105	0.239921
Fam114a1	5:64970070-65041874	2.03483	1.03957	-0.968918	0.918171	0.1081	0.627488
Gm5706	1:182392542-182393535	5.47955	2.80182	-0.967692	1.11434	0.05775	0.506183
Gm28527	1:46896582-46896879	3.11987	1.5963	-0.966757	0.536454	0.39785	0.874104
Gm29107	1:23293728-23294075	6.26744	3.21288	-0.964008	0.782756	0.2462	0.784591
Angptl2	2:33133416-33371486	26.1953	13.4686	-0.95971	1.90737	0.0017	0.083784
Gm29170	1:143777271-143807466	6.9666	3.58244	-0.959512	0.605778	0.34575	0.846969
Rpl31-ps4	16:87549061-87549451	29.5622	15.2044	-0.959267	1.12028	0.06875	0.539967
Gm12155	11:44387114-44387274	69.1246	35.557	-0.959065	0.682389	0.2404	0.78041
Gm9013	14:59647530-60197179	7.00918	3.61102	-0.956838	0.755496	0.1991	0.745277
Gm13529	2:33652388-33652798	4.41155	2.27367	-0.956262	0.698615	0.2274	0.770797
Gm5809	16:22230390-22230919	3.94717	2.035	-0.955791	0.693017	0.24205	0.78165
Gm13537	2:33133416-33371486	4.68353	2.416	-0.954976	0.176441	0.6167	0.946738
Gm5270	2:161254455-161255457	9.83651	5.07582	-0.954504	1.28034	0.0409	0.443409
Gm12362	4:34941007-34941349	11.2619	5.81677	-0.953162	0.822657	0.1426	0.680701
Igf1	10:87826376-87937042	16.5194	8.54227	-0.95147	0.938252	0.29015	0.812749
Ube2d1	10:71254979-71285262	136.139	70.4086	-0.951252	1.3661	0.21325	0.758492
Kcnq5	1:21398402-21962530	5.9717	3.08893	-0.951034	0.996309	0.11775	0.643673
Clcn3	8:60910388-60983300	17.7406	9.19256	-0.948516	3.33837	0.0014	0.0741463
Gm11507	11:87944402-87944814	6.91719	3.58626	-0.947706	0.771384	0.1596	0.70275
Gm17748	17:9421942-9422464	2.0911	1.08519	-0.946315	0.59611	0.28235	0.807841
Actr3b	5:25759996-25850342	2.67125	1.38758	-0.944943	1.04992	0.08445	0.580739
1110020A21Rik	17:84954966-85023991	4.63536	2.40918	-0.944141	0.189735	0.6137	0.946048
Tnfrsf21	17:43016554-43089188	6.46962	3.36516	-0.943006	2.23419	0.003	0.117211
Frmd8os	19:5845622-5875274	3.01318	1.56869	-0.94173	0.403373	0.51535	0.919233
Noxo1	17:24696233-24707660	2.76741	1.44134	-0.941122	0.386804	0.37525	0.862908
Vwa3b	1:37026595-37187613	8.555	4.4607	-0.939497	0.756461	0.26945	0.799796
Becn1	11:101277967-101302286	102.625	53.5912	-0.937311	0.461008	0.4032	0.876541
A230050P20Rik	9:20868641-20879727	4.7457	2.47967	-0.936469	0.860431	0.19755	0.743763
Gm27023	17:61781682-61781967	88.3934	46.2207	-0.935399	1.1983	0.0418	0.447503
Mdga1	17:29827955-29970087	6.22482	3.25549	-0.93516	0.920407	0.1581	0.701299
Gm13758	2:88572051-88579744	5.83398	3.05294	-0.934283	0.981081	0.09885	0.609337
2310001H17Rik	6:129208411-129237982	24.4737	12.8254	-0.932231	1.33493	0.02955	0.386449
Gm5652	12:5589616-5590624	6.74419	3.5344	-0.932181	1.09671	0.06205	0.520504
Aldh3a2	11:61223416-61267464	13.3618	7.00829	-0.930978	1.661	0.00365	0.131546
Dupd1	14:21676581-21714576	38.6326	20.2649	-0.930837	1.67978	0.0032	0.121794
Hmgb1-ps8	10:22158568-22374139	24.7286	12.9847	-0.929364	0.166925	0.61835	0.94716
Hspb3	13:113662895-113663676	62.4336	32.7974	-0.928741	1.90431	0.0021	0.0950511
Mylpf	7:127211607-127214298	59815	31434.5	-0.928158	0.688219	0.09075	0.593436
Ldha-ps2	4:119322892-119415521	119.431	62.8179	-0.926931	1.91766	0.00145	0.0756865
Rtel1	2:181319738-181356616	12.5982	6.63177	-0.925751	0.872241	0.12645	0.657048
Tmem87a	2:120355311-120504913	12.83	6.7564	-0.925189	0.789644	0.2171	0.761919
RP24-360M7.1	3:71465228-71465669	173.563	91.5192	-0.923311	1.23598	0.03245	0.402029
1700123M08Rik	4:11966564-11994280	14.6831	7.75056	-0.921787	1.10098	0.07635	0.561419
Spata2l	8:119910359-124345724	2.30926	1.22046	-0.920003	0.00916343	0.4107	0.880124
Hist1h2bp	13:21787460-21789213	3.99132	2.11142	-0.918654	0.712214	0.2627	0.795201
F830016B08Rik	18:60293379-60303016	3.90657	2.0689	-0.917034	1.15281	0.03435	0.412487
Gm26740	10:22158568-22374139	20.0487	10.6208	-0.916616	0.191294	0.5686	0.934983
Tmem55a	4:14864075-14915176	7.5925	4.02378	-0.916024	4.13512	0.00495	0.156327
Kdelc1,Tex30	1:44086612-44118808	6.01258	3.1869	-0.915831	0.840374	0.06095	0.517073
Gm12322	11:70844777-70969973	3.83424	2.0331	-0.915263	0.155459	0.63985	0.952307
Gm23924	6:74451796-74451904	12.0646	6.40067	-0.914491	0	1	1
Arhgap12	18:6024426-6136098	9.70028	5.15058	-0.91329	0.719407	0.07885	0.567749
Gm17800	19:24683015-24861855	1.93108	1.02585	-0.912592	0.402785	0.5997	0.942728
Gm13216	2:5293456-5714515	5.81942	3.11023	-0.903855	0.51207	0.3662	0.858404
Klhl20	1:161088374-161131511	3.07759	1.64513	-0.903602	3.30864	0.01275	0.258194
Tpm1	9:67022589-67049406	8317.87	4446.54	-0.903531	0.789362	0.1246	0.654129
Gfra1	19:58204138-58455909	3.65405	1.95451	-0.902691	0.671597	0.0444	0.458189
Tmem254b	14:26081515-26235744	2.73233	1.46169	-0.902498	0.436457	0.5604	0.932864
Gm15510	7:5050729-5060785	13.1965	7.06837	-0.900711	0.480659	0.3777	0.864249
RP23-131N18.1	2:15526478-16255555	2.67105	1.43158	-0.899803	0.606567	0.484	0.909227
Gm14056	2:136399061-136399703	6.83252	3.66249	-0.899593	0.935351	0.10635	0.624037
Zfp467	6:48427696-48445825	25.0757	13.4429	-0.899441	1.04473	0.0613	0.517978
Gm29649	1:16758204-16758623	2.00734	1.07625	-0.899274	0.568084	0.40605	0.877664
Myh8	11:67277123-67308634	404.574	216.957	-0.898992	1.54279	0.0285	0.380351
Itm2a	X:107397098-107403376	69.4728	37.2617	-0.898756	2.37011	0.0019	0.0898278
Gm7707	14:32201948-32297550	4.48963	2.40867	-0.89836	0.671237	0.25535	0.790834
Gm15795	1:20057778-20618064	3.12614	1.68223	-0.894007	0.687039	0.24385	0.782901
Gm7862	12:76120418-76177259	44.7102	24.0676	-0.89351	0.884948	0.1241	0.653179
Dhx35	2:158794806-158858214	15.3402	8.26764	-0.891772	0.70971	0.1926	0.738891
Esr1	10:4611592-5005614	5.58449	3.01069	-0.891332	2.02627	0.0049	0.155407
Zfp160	17:21008940-21028852	2.71834	1.46556	-0.891273	1.81326	0.0217	0.335298
Gm8722	X:77757377-77758146	33.7331	18.1933	-0.890756	1.56133	0.00985	0.225825
Gm9211	7:36234291-36235266	7.08115	3.81973	-0.890511	1.08682	0.07515	0.557856
Cuedc1	11:88098057-88194140	145.941	78.7354	-0.890302	1.11959	0.00385	0.135556
Gm10524	18:82593592-82694176	4.61144	2.48808	-0.890185	3.05611	0.11195	0.633901
Clu	14:65968482-65981548	123.371	66.5815	-0.889805	1.76182	0.00535	0.162687
Clcn1	6:42286684-42324643	66.231	35.7875	-0.888051	1.37807	0.0034	0.126349
Fam188a	2:12347262-12419470	7.85614	4.25012	-0.886318	0.903129	0.08055	0.571412
Phf21a	2:92043372-92364666	5.47164	2.96151	-0.885641	0.699399	0.12225	0.650934
Fubp3	2:31572650-31617526	6.83313	3.69922	-0.885324	0.587775	0.36035	0.854875
Gm13712	2:85156100-85158642	1.96381	1.06498	-0.882824	1.03063	0.1046	0.620302
Gm5863	X:120160709-120161717	4.11371	2.23146	-0.882453	0.937073	0.1084	0.628036
Gm14290	2:167098793-167101826	6.77554	3.67574	-0.8823	1.43678	0.0214	0.333595
Camk2d	3:126596301-126844913	14.2227	7.7175	-0.88199	0.847795	0.2381	0.778599
Gm4823	15:3745891-3746875	8.43725	4.58002	-0.88142	1.12389	0.0827	0.576481
Man1b1	2:25327449-25352212	13.6287	7.40139	-0.880777	0.786807	0.1192	0.646094
Gm10247	16:8922056-8922389	17.7756	9.65411	-0.88068	0.808395	0.16245	0.706477
Gm5388	X:51218876-51219993	6.39309	3.47439	-0.879754	0.97492	0.0561	0.500862
Gm15528	13:75869536-75943925	2.91496	1.58468	-0.879288	0.38059	0.664	0.958078
Gm5766	16:4229229-4231206	2.35213	1.27913	-0.878807	0.685536	0.25785	0.791904
Ptpla	2:13850281-14056135	15.793	8.60167	-0.876592	1.39741	0.0247	0.356345
Thg1l	11:45946842-45955494	2.62422	1.42984	-0.876028	0.780445	0.14455	0.683655
Gm20302	1:105382259-105663677	97.4304	53.1121	-0.875332	1.11987	0.6551	0.955891
Traf5	1:191997204-192151026	2.97182	1.62134	-0.874158	0.177713	0.4141	0.881783
Gm6226	7:58836792-58837938	2.08781	1.13956	-0.873507	0.790352	0.1865	0.732638
Crym	7:120186379-120202111	2.84053	1.55064	-0.873297	0.963965	0.1316	0.664789
Rnf128	X:139563315-139673145	17.7612	9.6981	-0.872956	1.70593	0.00275	0.111088
Gm22752,Gm5278	3:93306467-93465359	105.259	57.4871	-0.872638	4.41162	0.63095	0.950141
Gm28685	5:10187865-10237890	12.6697	6.92077	-0.872379	1.32316	0.02205	0.337891
Gm13368	2:15481911-15482341	8.3607	4.56707	-0.872355	0.766488	0.1836	0.729419
Gm14295	2:176798611-176811223	6.69844	3.65955	-0.872158	0.366387	0.31875	0.831474
Oaf	9:43221277-43239816	11.2995	6.17736	-0.871195	1.58498	0.00745	0.195394
RP23-45H9.13	6:41253327-41253771	2.0405	1.11659	-0.869831	0.526498	0.4043	0.876948
Gm15800	5:121220218-121368577	2.22279	1.21707	-0.868959	0.5337	0.192	0.738301
Jph2	2:163336241-163397993	338.765	185.65	-0.867698	1.46558	0.01645	0.293296
RP23-310C14.2	1:141356788-141357277	7.18175	3.93761	-0.867016	0.767403	0.17755	0.723089
Kcnb1	2:167103377-167240604	12.6297	6.92774	-0.866366	1.57294	0.00805	0.203553
WI1-298L18.1	3:52425407-52425648	12.2424	6.71602	-0.866202	0.590326	0.2742	0.80308
Phf2os1	13:48871111-48875460	1.84788	1.01424	-0.865474	0.546375	0.35925	0.854327
Lrrc75a	11:62604883-62648523	4.18953	2.29952	-0.865454	0.693675	0.22675	0.770374
Cd302	2:60251992-60284488	5.8053	3.18823	-0.864615	0.859292	0.18425	0.730227
Gm13549	2:59398985-59399781	9.99545	5.49413	-0.863382	1.07387	0.0725	0.55061
Capn10	1:92933525-92950590	4.97077	2.73234	-0.86333	0.587731	0.18745	0.733248
Zbed4	15:88751659-88784516	2.38817	1.31488	-0.860976	1.46779	0.0167	0.295534
Gm16056	5:26817202-27727505	73.714	40.6231	-0.859639	0.358689	0.57005	0.935234
Rpl38-ps1	4:138425787-138426002	98.7463	54.4364	-0.859156	0.998376	0.0903	0.592709
Fundc1	X:17556563-17572325	18.6248	10.2793	-0.857486	1.39872	0.01975	0.321089
Golga1	2:39016260-39065541	9.02194	4.9827	-0.85651	0.729232	0.1489	0.689748
Per2	1:91415981-91459324	4.1525	2.29364	-0.85634	0.571119	0.13015	0.662647
4930577N17Rik	3:51252719-51340663	2.25665	1.2471	-0.855605	0.373926	0.5628	0.933481
Fgfbp1	5:43978864-43981762	33.454	18.5005	-0.854613	1.69175	0.0039	0.136542
Gm16550	1:165137854-165160773	67.357	37.2695	-0.853831	0.57511	0.34535	0.846696
Mapk6	9:75369061-75410005	12.318	6.817	-0.853557	0.910572	0.0238	0.350166
Serpine2	1:79794196-79861180	76.7445	42.4947	-0.852781	1.42671	0.0155	0.284791
Rpl31-ps10	4:137395298-137395676	11.8513	6.5653	-0.85211	0.775132	0.19075	0.736876
Gm11246	4:75941237-78214177	2.97265	1.64717	-0.851759	0.250885	0.69955	0.964574
Gm15491	19:45747733-45783520	3.00012	1.66271	-0.851484	0.225167	0.71975	0.968122
Gm5269	1:45889524-45890273	11.4865	6.36611	-0.85145	2.82883	0.7504	0.972499
Tbc1d1	5:64159450-64351486	32.4539	17.9931	-0.850949	0.855359	0.1325	0.66604
Gm8121	5:57570081-58133234	115.62	64.1174	-0.8506	1.51711	0.01435	0.273869
Ncl	1:86344718-86359400	60.0056	33.2789	-0.850489	1.51118	0.01765	0.304241
Ccpg1os	9:72958784-73042779	19.754	10.9575	-0.850228	0.346624	0.6473	0.954016
Parg	14:32201948-32297550	9.24154	5.13291	-0.848357	0.703674	0.27165	0.80117
Ccdc62,Denr	5:123907174-123969895	39.3597	21.8612	-0.848344	0.729061	0.29715	0.817193
Gm14131	2:149356686-149357405	4.7101	2.61723	-0.847719	0.8179	0.19715	0.743293
Gm12969	4:128846196-128873698	27.446	15.2548	-0.847329	1.53131	0.01005	0.228025
Gm9157	X:103529482-103529707	27.7191	15.4425	-0.843976	0.618997	0.2704	0.800556
Cdc27	11:104502744-104550620	3.97501	2.21623	-0.842849	1.64075	0.0104	0.232443
Paqr7	4:134496696-134510235	5.04027	2.8122	-0.841801	1.301	0.02405	0.351913
Stim2	5:53998416-54121057	21.2271	11.8489	-0.841151	1.15863	0.05115	0.484119
Kazald1	19:45075240-45079289	14.4315	8.06327	-0.83978	1.41354	0.0204	0.326305
Gm5944	X:115458893-115459894	22.998	12.8567	-0.838988	1.46213	0.0137	0.267771
Pfkfb3	2:11471432-11554077	164.033	91.7093	-0.838847	1.03693	0.03905	0.434409
Psmc6	14:45329823-45349071	31.3239	17.5331	-0.837178	1.98741	0.00235	0.101533
Lrrc1	9:77430822-77544870	2.42755	1.35947	-0.836451	0.708023	0.31805	0.831056
Gm7114	1:33100906-33102695	11.5444	6.46741	-0.835933	1.44199	0.01505	0.280422
Sdc2	15:32920722-33034730	9.35966	5.24804	-0.834676	0.635246	0.27365	0.80261
Gm8923	2:175469984-175482171	2.92472	1.63995	-0.834649	0.624972	0.2232	0.767096
Gm5835	1:143093346-143094616	316.269	177.699	-0.831711	1.67864	0.00625	0.177499
Gm5548	3:113053888-113054284	2.07842	1.16788	-0.831591	0.545819	0.4679	0.903731
Glmn	5:107497377-107688015	2.43524	1.36849	-0.831479	0.347119	0.362	0.855913
Gm11198	11:79339692-79581612	2.6998	1.51778	-0.83089	0.360881	0.56825	0.934903
Iigp1	18:60376028-60392627	7.56579	4.25461	-0.830464	1.24256	0.0224	0.340246
Amd-ps3	18:64448518-64450014	33.2021	18.683	-0.829551	1.90752	0.0048	0.153687
Pcyox1	6:86386005-86397150	42.8038	24.1285	-0.827	0.982044	0.1208	0.648429
Rnd3	2:51130437-51149111	2.29173	1.29249	-0.826286	1.02531	0.06725	0.53567
Prpf39	12:65036332-65073944	3.85211	2.17352	-0.825619	0.766915	0.3342	0.8409
1810044D09Rik	6:91440986-91441755	13.1447	7.42128	-0.824737	0.854537	0.14985	0.691057
Ntf3	6:126101412-126166744	2.65307	1.49813	-0.824499	0.781826	0.18625	0.732428
Fads2	19:10064163-10101503	1.93628	1.09366	-0.824115	0.737667	0.1584	0.701569
Ccndbp1	2:121008402-121016904	43.5864	24.6217	-0.823947	0.94668	0.1397	0.676449
Gm16124	9:53614581-53681265	12.6353	7.13777	-0.823914	0.323755	0.73855	0.970781
3110062M04Rik	6:34863145-34878060	2.32255	1.31217	-0.823756	0.24392	0.57445	0.936447
Gm9506	4:148960296-149099876	51.2506	28.962	-0.823408	0.586691	0.2888	0.812019
Rnf170	8:26119367-26143871	7.51871	4.25076	-0.822765	1.39717	0.00725	0.192478
Tceal3	X:136590841-136668378	6.05343	3.42325	-0.822385	0.85987	0.12205	0.650492
RP23-235F22.1	3:49892525-50443614	9.29019	5.25554	-0.821869	0.44136	0.4188	0.883767
Gm11235	4:72542665-72542998	14.6841	8.3085	-0.821591	0.73518	0.20565	0.751831
Cep19	16:32099799-32108069	12.603	7.13388	-0.821013	1.42217	0.01745	0.30236
Kcnc1	7:46396496-46438375	36.2239	20.5222	-0.81976	0.671048	0.16845	0.713164
Gm13313	2:15127599-15128683	2.24467	1.27181	-0.819614	0.769885	0.20025	0.746351
Tbcd	11:121451948-121673153	6.01083	3.40872	-0.818332	0.579136	0.2044	0.750426
Gm6877	8:33191195-33192296	5.49233	3.11695	-0.817285	0.973127	0.07595	0.560279
Gm14753	X:78021041-78021287	10.7738	6.12548	-0.814635	0.557607	0.32575	0.835535
Gm17068	19:16132830-16387463	2.52665	1.43746	-0.813704	0.183247	0.7002	0.964651
Gm17430	18:9707647-9877995	2.21129	1.25871	-0.812941	0.312556	0.66115	0.957469
RP23-299B23.1	3:7192777-7193210	3.42877	1.95235	-0.812479	0.581366	0.3447	0.846288
Cyp2f2	7:27119908-27133660	5.05664	2.88041	-0.811903	1.11393	0.03645	0.423064
Mapk8	14:33377897-33447158	7.55869	4.30739	-0.811321	1.08288	0.05025	0.48079
Cmpk1	4:114959335-114987241	17.1008	9.74667	-0.811082	0.524058	0.43995	0.89334
Gm3646	1:39804147-39805332	3.28021	1.87006	-0.810705	0.509405	0.38025	0.865559
Coq10b	1:55051318-55072702	9.58094	5.46883	-0.808935	1.8995	0.0565	0.502351
Tmem107	11:69070805-69073293	4.02437	2.29729	-0.80883	0.532788	0.23425	0.775943
Rnf43	11:87662721-87735539	1.75267	1.00051	-0.808817	0.521458	0.31565	0.829472
Slc25a27	17:43641899-43667015	5.85531	3.34374	-0.808282	1.39875	0.01625	0.291333
Gm8770	X:78785746-78786855	2.20942	1.26219	-0.807745	0.778531	0.2121	0.75762
Morn4	19:42074938-42086370	2.61763	1.49582	-0.80732	0.959294	0.09845	0.608552
Zfp612	8:110079763-110102753	4.06582	2.32381	-0.807055	1.18515	0.0566	0.502581
Ap4s1	12:51608540-51738939	36.9986	21.1564	-0.806374	0.691372	0.227	0.7705
Colq,Hacl1	14:31523081-31668579	29.822	17.0633	-0.805483	0.498137	0.482	0.908364
2700089E24Rik	6:133105238-133110899	131.199	75.0906	-0.805048	1.04003	0.0692	0.541265
Pdzd7	19:45015175-45046614	2.43297	1.39302	-0.804498	0.506682	0.4089	0.87927
Gm5822	19:28835048-28967800	11.8193	6.77193	-0.803509	0.887654	0.25325	0.789428
Aldoart2	12:55565238-55566896	271.509	155.665	-0.80256	1.60986	0.0089	0.214828
Gm8185	13:76384534-77031810	20.2701	11.6298	-0.801528	1.07429	0.0802	0.570819
RP24-498P8.3	9:108096021-108190384	6.31563	3.6239	-0.801383	0.66937	0.23075	0.773367
Atp8a1	5:67607882-67909013	8.11463	4.65701	-0.801121	1.24311	0.0046	0.150094
Tmem184c	8:77595981-77610698	7.73582	4.4403	-0.800897	0.939078	0.1122	0.634113
Gm6060	1:15760121-15760668	1.91256	1.09841	-0.800089	0.454373	0.5798	0.93789
Ppp1r14c	10:3364072-3464975	30.6395	17.6037	-0.79951	6.17562	0.0037	0.132516
Gm12978,Gm12992	4:131873616-131920029	3.8327	2.20232	-0.79934	0.2658	0.6928	0.963427
Crnde	8:92326037-92356120	4.84118	2.78358	-0.798414	0.822509	0.19325	0.739626
Ints8	4:11191350-11254258	4.03299	2.31925	-0.798189	0.455418	0.25165	0.788178
Zscan20	4:128583538-128610098	1.81682	1.04498	-0.797943	0.665537	0.11925	0.646168
Gm14113	2:147177545-147331681	1.77659	1.02329	-0.795898	0.575095	0.35545	0.852481
Gm12013	11:17095489-17095644	710.831	409.487	-0.795687	1.15364	0.04495	0.460574
Snapc5	9:64179296-64182684	32.2351	18.5705	-0.795624	1.4879	0.013	0.260918
Asl	5:130011257-130025132	5.62745	3.24297	-0.795163	0.839477	0.10045	0.612373
Efcab6	15:83866711-84065379	8.07187	4.65398	-0.794437	0.825765	0.1114	0.633047
Aldoart1	4:72850582-72852634	826.316	476.905	-0.792992	1.27588	0.04205	0.448082
1700037C18Rik	16:3847267-3941147	2.84701	1.64459	-0.791726	0.242264	0.46335	0.902034
Sec14l5	16:5147108-5183934	6.14192	3.54792	-0.791718	1.34536	0.0436	0.454616
Ran	5:129020068-129024323	45.8099	26.474	-0.791083	0.448144	0.285	0.809525
Syne4	7:30314806-30319046	2.50498	1.44857	-0.790167	0.486378	0.18185	0.727398
Gm2007	2:175741536-175751419	3.51971	2.03664	-0.789264	0.747754	0.579	0.937814
Trim7	11:48825345-48853493	26.7569	15.4916	-0.788422	0.720556	0.108	0.627279
Amd-ps1	X:155155194-155156188	3.61861	2.09609	-0.787735	0.790012	0.16675	0.711275
Cog3	14:75702350-75754493	3.83333	2.22053	-0.787694	1.6681	0.0165	0.293738
Gm11196	11:78567167-78697373	6.03802	3.50003	-0.78671	0.417364	0.51415	0.918913
Gm14419	2:177000955-177012787	3.13247	1.8158	-0.786694	0.682537	0.29645	0.816992
Gm4997	X:155150951-155151311	40.9592	23.7516	-0.786161	1.02892	0.08015	0.570714
Crygn	5:24751002-24758008	2.93537	1.70377	-0.784814	0.599316	0.6979	0.964334
Gm3756	9:31936458-31936755	1.92467	1.11718	-0.784745	0.53505	0.5965	0.941947
Gm11451	2:162898893-162899523	29.9205	17.3693	-0.784596	1.19132	0.03405	0.411203
Bbs7	3:36573141-36613477	4.11917	2.39185	-0.784228	0.638663	0.1522	0.694384
Gm6946	7:12742685-12743672	1.78112	1.03506	-0.783075	0.71018	0.23595	0.777105
Fer1l6	15:58510047-58665092	6.38768	3.71563	-0.781684	0.841976	0.15495	0.697428
RP23-199M5.5	3:19644473-19692421	5.02205	2.92299	-0.780832	0.240471	0.7359	0.970376
Azin2	4:128930232-128962442	2.40656	1.40074	-0.78078	0.641222	0.2679	0.798879
Mybpc2	7:44501698-44524669	2162.25	1258.79	-0.780498	0.889855	0.11375	0.63699
Serf1	13:100106794-100114571	6.28354	3.65908	-0.780097	0.740323	0.1823	0.727932
Asb18	1:89950219-90014666	13.3385	7.76751	-0.780069	1.19882	0.10285	0.616973
Sdccag8	1:176814659-177258203	6.76949	3.94425	-0.779298	0.603679	0.33405	0.840835
Cacna1a	8:84388439-84640246	2.42326	1.41192	-0.779291	0.6273	0.27835	0.805574
Fndc1	17:7738568-7827302	6.57906	3.83378	-0.779113	1.28665	0.0071	0.190148
Rpl17-ps4	4:63895544-63896099	3.43804	2.00444	-0.778387	0.574152	0.28545	0.809834
Gm28071	1:79957579-79958057	27.8667	16.2484	-0.778248	1.10511	0.06615	0.532278
Eps15	4:109280267-109387817	22.3821	13.0567	-0.777553	1.09063	0.0656	0.530728
Pdp1	4:11958183-11966452	41.1603	24.0213	-0.776938	1.70316	0.0139	0.269504
Csnk2a2	8:95446095-95488820	2.34885	1.37099	-0.776738	1.12213	0.05765	0.505973
Gm9146	7:32473251-32474257	2.0814	1.21493	-0.776683	0.720957	0.23865	0.778935
Gm6457	18:14570100-14570915	20.0435	11.7033	-0.776218	1.27401	0.02935	0.385402
Gm8174	15:10560523-10561524	10.7204	6.26078	-0.775945	1.13228	0.05605	0.500667
Gm5091	17:15231584-15240783	1.92791	1.12662	-0.775039	0.920966	0.1765	0.721921
Myh4	11:67238028-67260446	9541.85	5576.36	-0.774945	0.538829	0.25755	0.791681
Snora16a	4:132308677-132311024	5.05199	2.95406	-0.77415	0	1	1
Egflam	15:7206119-7411381	12.3174	7.20366	-0.773896	0.708033	0.1666	0.71114
Gm12499	3:108029599-108031361	4.13788	2.42061	-0.773523	0.648484	0.2321	0.774306
Zyg11b	4:108229723-108301096	13.0927	7.6615	-0.773069	2.76078	0.02535	0.361055
Rragd	4:32983036-33022180	61.7517	36.1408	-0.772849	1.69386	0.012	0.250296
1700028K03Rik,A830010M20Rik	5:107497377-107688015	3.08073	1.80323	-0.77269	0.798015	0.1135	0.636566
Bccip	7:133686242-133881532	112.993	66.1525	-0.772363	0.934436	0.0993	0.610163
BB218582	2:106642913-106650364	18.6864	10.9487	-0.771226	0.580653	0.31395	0.828586
Gm14698	X:68821092-68825318	17.2921	10.1319	-0.771209	2.314	0.0158	0.287259
Atg4a-ps	3:103575230-103646023	17.1466	10.0496	-0.770783	1.29956	0.026	0.365259
Dicer1	12:104687741-104751952	6.75514	3.9607	-0.770231	1.96458	0.00495	0.156327
6330408A02Rik	7:13258966-13311433	13.5747	7.96089	-0.76992	0.445129	0.16125	0.705018
Rps15a	7:118104377-118116186	162.459	95.3163	-0.769283	0.84241	0.1552	0.697745
Mkl1	15:80977764-81190757	7.822	4.5938	-0.767851	0.822934	0.1169	0.642107
Hs2st1	3:144431102-144570181	4.06321	2.38724	-0.767278	2.00897	0.0557	0.499516
Gm15265	3:94974730-95015448	2.76207	1.62551	-0.764858	0.276354	0.6719	0.959819
Erdr1	Y:90784737-90816464	12.8599	7.56868	-0.764762	1.03686	0.1488	0.689516
Daf2	1:130388536-130437914	2.01278	1.1857	-0.763446	0.369804	0.62615	0.948971
Plekha6	1:133181320-133303435	4.07708	2.4043	-0.761922	0.811445	0.24115	0.781007
Gm12165	11:46036439-46036781	3.43468	2.02663	-0.761093	0.459119	0.45285	0.898155
Gm13622	2:69722544-69754012	5.87291	3.46551	-0.76101	0.292781	0.7474	0.972123
Snora34	15:98518820-98534244	26.0304	15.3607	-0.760957	0.162754	0.69685	0.964123
Rpl31-ps7	6:47785995-47786374	2.73885	1.61708	-0.760178	0.47662	0.40135	0.875543
Gm11826	4:13482754-13483192	51.2054	30.2385	-0.759906	1.24134	0.046	0.464904
Gm8424	X:150924619-150926159	25.6796	15.1676	-0.759633	1.43697	0.01825	0.309361
Fam151b	13:92449621-92484031	2.07612	1.2267	-0.759112	0.87012	0.18475	0.730833
Ugcg	4:59189256-59222833	2.80853	1.65953	-0.75904	0	1	1
Tmtc1	6:148232429-148444389	10.2413	6.05334	-0.758589	2.63039	0.00715	0.190925
Gm5776	7:54412157-54412478	42.8152	25.3152	-0.758115	0.867664	0.1349	0.669686
Rtn4	11:29692946-30026033	447.944	264.864	-0.758064	0.943689	0.12685	0.657559
B230206L02Rik	11:94133484-94155776	3.97189	2.35	-0.757165	0.585261	0.30955	0.825591
Slc38a6	12:73286778-73354049	2.47296	1.46334	-0.756968	0.432981	0.3797	0.865266
Gm13502	2:53696120-53696804	5.84867	3.46118	-0.756846	0.779252	0.18265	0.728261
Gm6944	18:55972285-55973291	7.57927	4.48674	-0.756391	0.95493	0.08955	0.591065
RP24-212P5.2	1:170630920-170631501	9.27526	5.49078	-0.756378	0.838019	0.1417	0.679363
Gm12470	4:53631470-53707009	3.43001	2.03206	-0.755269	0.500597	0.3675	0.859037
Eif2ak3	6:70844514-70905245	1.99115	1.17982	-0.755034	0.449103	0.3129	0.827844
Setd7	3:51515318-51567117	58.3414	34.5753	-0.754777	0.846786	0.02555	0.362352
Fam189b	3:89183142-89189295	15.6187	9.25684	-0.754679	0.799576	0.1464	0.686176
RP23-349K15.2	6:117646692-117751769	29.2185	17.3255	-0.753986	1.27603	0.0507	0.48242
Tada2a	11:84078919-84129600	12.3616	7.33121	-0.753747	0.593086	0.369	0.859841
Gm15946	17:12962767-12963190	14.4176	8.55184	-0.753522	0.780457	0.1667	0.711233
Gm12131	11:39727069-39727712	2.57726	1.52873	-0.753509	0.478662	0.4207	0.884681
Gm11852	4:18193530-18193752	3.2592	1.93337	-0.753398	0.444093	0.5711	0.935524
Gm27529	15:7873054-8099209	248.147	147.258	-0.752853	0.289907	0.76255	0.97431
Gpx7	4:108400389-108406961	11.1458	6.61766	-0.752107	1.1106	0.0447	0.459364
Nsun3	16:62732443-62786818	6.33472	3.7624	-0.75163	0.415611	0.5508	0.930161
Akr1e1	13:4590756-4609174	10.3733	6.16251	-0.751278	0.841468	0.1374	0.673131
Nr1d2	14:18204053-18239127	31.2467	18.5662	-0.751024	1.60002	0.0096	0.222904
Tusc2	9:107551554-107572779	78.0661	46.394	-0.750758	0.667101	0.1768	0.722276
Gm5417	15:83375606-83464606	3.34086	1.98728	-0.749421	0.143943	0.68455	0.962273
Sema6c	3:95160456-95174024	45.8594	27.2817	-0.749284	0.805408	0.1326	0.666121
RP23-302C16.5	1:136789181-136789520	7.15557	4.25936	-0.748431	0.541084	0.35025	0.849406
Atad3aos	4:155761177-155776161	1.97369	1.17619	-0.746778	0.265358	0.58035	0.937966
Gm11483	4:63558780-63586357	3.40577	2.03058	-0.746092	0.130822	0.70385	0.965368
Golm1	13:59634995-59675784	4.75673	2.83627	-0.745976	1.41062	0.0212	0.332186
Sumf2	5:129846989-129903623	5.10296	3.04306	-0.745813	0.11781	0.5314	0.924387
Pcnxl3	19:5664634-5688908	22.9312	13.6775	-0.745511	0.745277	0.23395	0.775769
Gm10075	1:172669033-172669636	4.11641	2.45597	-0.745096	0.661261	0.2499	0.787169
Srr	11:74898070-75164448	10.4322	6.22737	-0.744347	0.630714	0.18625	0.732428
Cyp4v3,Klkb1	8:45269441-45333216	3.29068	1.97052	-0.73981	1.13205	0.05575	0.49964
Pds5b	5:150673738-150810690	7.94866	4.75995	-0.739765	1.08028	0.03275	0.403786
Cbfb	8:105170673-105217989	65.0026	38.9274	-0.739713	1.01331	0.0234	0.347352
Plcd1	9:119071526-119093496	4.42953	2.65275	-0.739665	1.4252	0.0313	0.39578
Tmod4	3:95124475-95129209	371.116	222.314	-0.739271	1.41739	0.02195	0.337107
Rnf150	8:82863355-83091271	10.2359	6.13695	-0.738041	2.27949	0.01015	0.229331
Memo1	17:74200705-74294883	20.591	12.3484	-0.737691	1.46341	0.0168	0.296501
Mef2c	13:83504033-83667079	85.7623	51.4407	-0.737433	2.11583	0.029	0.383359
Arl1	10:88729540-88744094	36.7931	22.0782	-0.736813	1.74407	0.00845	0.209099
Rccd1	7:80316595-80324454	9.33851	5.60562	-0.736319	0.332745	0.39285	0.871332
Gm6787,Psmb7-ps2	X:8097086-8106701	4.08852	2.45547	-0.735576	0.75255	0.21285	0.758256
Ppm1j	3:104767405-104786018	27.5268	16.5378	-0.735071	1.32084	0.0255	0.362001
Gm15378	X:75143423-75143630	28.8016	17.3194	-0.733763	0.578585	0.3706	0.860567
Caprin2	6:148842491-148896237	2.07003	1.24533	-0.733117	0.53606	0.3153	0.829313
Hist1h4i	13:22040635-22041362	27.1965	16.3773	-0.731719	0	1	1
Gm12497	3:107979631-107979868	3.68864	2.22128	-0.731698	0.707596	0.6684	0.958955
Cd209f	8:4102786-4105835	6.60265	3.97619	-0.731658	0.960125	0.09575	0.603136
Ogfod1	8:94037197-94067921	7.82656	4.71707	-0.730487	1.03429	0.12055	0.648002
Gm2467	10:21289218-21290228	7.54616	4.54817	-0.730457	0.905075	0.11565	0.640537
Reep1	6:71707560-71810710	26.455	15.9551	-0.72952	1.81345	0.0096	0.222904
Mmp11	10:75923221-75932502	5.67783	3.42465	-0.729384	0.440733	0.46425	0.902372
BC023829	X:70459752-70477180	20.5189	12.3788	-0.729084	1.49912	0.0079	0.201455
Gm8492	17:9320394-9321381	5.06851	3.05794	-0.729002	0.815404	0.14975	0.69098
Id2	12:25093800-25096092	4.07526	2.45914	-0.728737	1.06265	0.10235	0.616135
Ak4	4:101419276-101466995	5.3146	3.20858	-0.728026	1.49454	0.019	0.315011
Chrne	11:70614882-70619216	17.1361	10.3479	-0.727701	0.830074	0.15415	0.696638
Trim39	17:36258872-36272247	4.85234	2.93032	-0.727622	1.50406	0.0284	0.379833
Tnnc2	2:164769897-164779967	13498.1	8152.9	-0.727369	0.964951	0.099	0.609656
Xpr1	1:155275700-155417415	15.564	9.40091	-0.72734	2.00133	0.0098	0.225246
Vps45	3:95999831-96058466	8.64869	5.22397	-0.727336	0.471623	0.4677	0.903687
Exoc1	5:76529310-76570294	15.0096	9.07184	-0.726419	0.843685	0.1787	0.724439
Gm12344	11:77089914-77188968	48.7674	29.4908	-0.725651	0.765566	0.19295	0.739305
Gm6685	11:28339103-28339867	19.0537	11.5357	-0.723963	1.07256	0.0664	0.532932
Rdh14	12:10390779-10395562	35.1504	21.2827	-0.723862	1.72154	0.0098	0.225246
Map2k6	11:110399121-110525522	5.74585	3.4797	-0.723558	1.09275	0.0599	0.513483
Gm5808	15:99555835-99556192	8.20567	4.97075	-0.723157	0.600334	0.25965	0.792826
Usp34	11:23306894-23499661	12.1207	7.34714	-0.722222	0.34259	0.4528	0.898108
Ctsh	9:90054151-90076089	12.123	7.34919	-0.722088	1.01566	0.06795	0.537364
Gm5406	16:45411579-45492969	12.9616	7.86573	-0.720591	0.964331	0.09765	0.607111
Cacna2d1	5:15934690-16374511	42.8283	25.9976	-0.72019	1.561	0.0178	0.305513
Bche	3:73635807-73708415	3.46967	2.10634	-0.72006	1.18381	0.0253	0.360729
Gm13668	2:73959668-73960669	3.88678	2.36071	-0.719356	0.740778	0.17485	0.720007
Srsf9	5:115327176-115333080	9.00803	5.47306	-0.718865	0.919082	0.1797	0.725314
Polk	13:96480688-96542485	2.36707	1.43917	-0.717861	1.20993	0.0596	0.512385
Gm7117	X:105725127-105725514	27.772	16.8869	-0.717727	0.902394	0.11395	0.637459
Rgma	7:73314002-73419899	15.1884	9.23603	-0.717622	1.4851	0.01135	0.243344
Fam118b	9:35184550-35267805	13.843	8.42092	-0.717111	0.38066	0.5401	0.926876
B3galnt2	13:13954673-14039638	27.9569	17.0126	-0.716598	1.40965	0.01475	0.277846
Gm12778	7:34175711-34176044	11.6405	7.08367	-0.71658	0.6365	0.25925	0.792748
Rbmx	X:57383529-57393036	10.1964	6.20619	-0.716274	1.57845	0.12295	0.651793
Deb1	9:121710388-121712921	91.9253	55.9753	-0.715672	1.38267	0.0168	0.296501
Chia1	3:106113228-106132120	2.18575	1.33102	-0.715593	0.842662	0.19125	0.737401
Pgm2	4:99765401-99987294	578.545	352.386	-0.715274	1.20726	0.05585	0.500019
Ldha	7:46841474-46855627	3290.2	2004.24	-0.715118	0.885821	0.10405	0.619396
Cmss1	16:57302198-57606825	9.1869	5.59815	-0.714627	0.389478	0.5261	0.922899
Wapal	14:34673927-34747983	12.5806	7.66729	-0.714413	0.886712	0.1398	0.676626
Cfh	1:140084707-140183764	5.00173	3.04954	-0.713832	0.900942	0.0822	0.575428
Pin4	X:102119446-102127669	4.53496	2.76646	-0.71305	0.595196	0.2502	0.787349
Gm7781	X:130524636-130525424	3.9053	2.38242	-0.713006	0.745516	0.26595	0.797454
Gm13443	2:35340408-35340963	159.114	97.0928	-0.712622	1.50474	0.00865	0.211826
Rpl5-ps1	1:14865071-14865965	117.192	71.5144	-0.712572	1.56425	0.00985	0.225825
Gm6253	6:117808719-117809220	2.26323	1.38121	-0.712448	0.510401	0.4098	0.879734
Phka1	X:102513974-102644246	118.321	72.24	-0.711834	1.35775	0.03015	0.38989
Slc1a1	19:28835048-28967800	2.88518	1.76236	-0.711157	0.814431	0.2078	0.753937
Parm1	5:91517614-91626894	15.0243	9.17788	-0.711068	1.83541	0.01175	0.247744
Zfp949	9:88548019-88571061	8.29449	5.07	-0.710166	1.15337	0.0527	0.489674
Zfp938	10:82224849-82241280	2.39298	1.46339	-0.709497	0.773746	0.1933	0.739688
Ano5	7:51511028-51598709	19.328	11.8226	-0.709143	2.49341	0.0094	0.220597
Tmem175	5:108629769-108684557	6.81475	4.17135	-0.708148	0.690702	0.26075	0.793578
Dera	6:137754541-137837891	7.94788	4.865	-0.70813	1.10965	0.07475	0.556672
Hps5	7:46760465-46796064	7.55171	4.62396	-0.707673	0.627828	0.33335	0.840419
Tcea2	2:181680309-181688071	5.18113	3.17388	-0.70702	0.511345	0.38235	0.866736
Gm11814	4:10438814-10439743	60.908	37.3163	-0.706826	1.42565	0.014	0.2705
Dpyd	3:118562128-119432918	2.61454	1.60197	-0.706717	0.937382	0.0617	0.519275
Ppm1l	3:69316860-69560802	76.6742	46.982	-0.706633	0.59519	0.2558	0.791091
Pctp	11:89982664-90002894	2.95383	1.81015	-0.706476	0.996936	0.08355	0.578543
Snx24	18:53245661-53390823	7.60056	4.66075	-0.705545	1.1226	0.05325	0.491452
Haus7	X:73437314-73459044	11.2316	6.88812	-0.705387	0.732126	0.2147	0.759749
Atcayos	10:81194608-81230833	116.756	71.6335	-0.704784	1.01556	0.09355	0.598617
Gm16200	9:90163068-90270804	10.8222	6.64002	-0.704735	0.316055	0.60545	0.943951
Sepsecs	5:52640086-52669729	2.92567	1.79571	-0.704211	1.10328	0.0463	0.465964
Zdhhc24	19:4878667-4885397	2.61652	1.60684	-0.703419	0.984704	0.2093	0.754999
Airn	17:12682405-12868143	14.6315	8.98564	-0.703387	0.376982	0.4182	0.883461
Maoa	X:16619697-16687818	2.72664	1.6752	-0.70279	1.19229	0.06405	0.526288
Gm9812	12:55602928-55821580	1.7402	1.06949	-0.70233	0.213047	0.7558	0.97332
Pik3c2b	1:133045666-133108687	2.13861	1.31467	-0.701973	1.25361	0.2518	0.78837
Oaz2-ps	3:135485610-135571404	76.8518	47.2823	-0.700777	1.23948	0.03385	0.409943
Mia3	1:183326724-183351108	41.7465	25.7095	-0.699355	0.715507	0.08365	0.578837
Gm13320	2:14174522-14221993	47.556	29.3064	-0.69841	0.408607	0.49875	0.913773
Creg1	1:165763745-165775308	35.6259	21.9644	-0.697756	2.01189	0.0145	0.275518
Ankrd49	9:14780208-14782964	4.92651	3.03805	-0.697421	1.85879	0.0659	0.531459
Ubtd2	11:32455369-32516687	3.84034	2.36827	-0.697402	0.741801	0.2063	0.752552
Atm	9:53439148-53536740	2.35454	1.45253	-0.696875	0.340048	0.37755	0.864123
Mapk12	15:89130584-89140703	83.3289	51.4113	-0.696732	1.50833	0.0134	0.264881
Dync1h1	12:110601451-110666945	76.1321	46.9752	-0.696605	0.497933	0.27235	0.801573
Snord69	14:30999825-31019089	44.8095	27.6522	-0.696413	1.80385	0.72915	0.969535
Cep76	18:67617396-67641336	2.1659	1.33677	-0.696221	1.43798	0.0636	0.525243
Ppp4r2	6:100833637-100868717	7.36113	4.54463	-0.695766	2.16143	0.0149	0.279232
Pecr	1:72236464-72284314	20.3384	12.5585	-0.69555	1.29777	0.0668	0.534255
Zfyve9	4:108637465-108781904	12.8113	7.91779	-0.694245	2.01723	0.0108	0.237257
Ddx1	12:13219307-13249213	32.1242	19.8652	-0.693414	1.52565	0.0124	0.254481
Ehbp1l1	19:5707375-5726317	106.578	65.9161	-0.693209	1.20188	0.0433	0.453365
Rufy1	11:50389285-50431125	11.674	7.22072	-0.693089	0.73996	0.28745	0.811272
Lrrc71,Pear1	3:87617558-87824306	4.65185	2.87858	-0.692448	0.472641	0.3017	0.820132
Msra	14:64122622-64455903	14.2634	8.82631	-0.692441	1.33075	0.023	0.344571
5033430I15Rik	13:45965252-45966508	5.8686	3.63275	-0.691957	0.727028	0.23415	0.775867
Gm6133	18:78349753-78350701	4.03447	2.49757	-0.691851	0.743124	0.24155	0.781312
Aamdc	7:97550330-97579497	162.279	100.538	-0.690732	1.29112	0.0305	0.391725
Rfx5	3:94954074-94962048	3.3905	2.10126	-0.690243	0.628622	0.1421	0.679917
Rpl31	1:39367841-39478755	56.7831	35.1971	-0.690003	0.589301	0.36535	0.857885
Trub2	2:29759311-29797935	15.4689	9.58905	-0.689915	0.788604	0.11595	0.640751
Gm7286	9:45835928-45836935	14.4506	8.95989	-0.689576	1.04338	0.069	0.540632
Extl3	14:65052059-65098106	15.5795	9.6604	-0.689494	1.55291	0.01385	0.269123
Gm7967	1:98589516-98607384	5.56781	3.45275	-0.689365	0.526521	0.4462	0.895647
Ldha-ps	2:59899362-60209839	9.57784	5.95039	-0.686715	0.614225	0.28525	0.80971
Gm11362	13:28460033-28885620	3.4743	2.15895	-0.686393	0.683711	0.24605	0.784517
Atp8b2	3:89939480-89963508	2.95654	1.83736	-0.686275	0.482678	0.1752	0.720295
Fgf13	X:59062144-59568071	42.2233	26.2428	-0.68612	0.801249	0.15445	0.696946
Wdr35	12:8973891-9028847	3.14789	1.95688	-0.685832	0.53521	0.28365	0.808716
Dapp1	3:137931006-137981545	2.68629	1.67014	-0.68564	0.521667	0.2151	0.760075
Filip1l	16:57302198-57606825	18.297	11.384	-0.6846	1.32063	0.02455	0.355419
Cstf3	2:104590522-104712169	4.30906	2.68104	-0.684577	0.530835	0.36165	0.855726
Ift140	17:25016090-25099495	3.30953	2.05937	-0.684423	0.382917	0.48135	0.908016
Ctso	3:81932600-81956725	2.71303	1.68929	-0.683487	1.44106	0.0941	0.599655
Sfrp2	3:83766320-83789956	1.70533	1.06196	-0.683319	0.194098	0.54015	0.926876
Hmgb1-ps7	7:42011791-42058981	5.83789	3.63605	-0.683074	0.690699	0.2421	0.78165
Gm15526	6:54039553-54503768	74.4395	46.3672	-0.682966	0.326744	0.56105	0.933074
Fuca2	10:13499539-13519035	10.884	6.78062	-0.682725	0.8931	0.1003	0.612089
Prkaa2	4:105029873-105109890	44.356	27.6338	-0.682695	1.72688	0.02135	0.333331
Set	2:30057377-30072577	14.418	8.98268	-0.682657	2.02311	0.039	0.434216
Gm13365	2:15396747-15397720	4.47377	2.78776	-0.682386	0.762583	0.18515	0.731235
Synm	7:67730160-67759742	215.867	134.57	-0.681788	1.10107	0.0554	0.498565
Cyb5d2	11:72777231-72796142	12.1663	7.58445	-0.681775	1.75013	0.02635	0.367365
Gm11918	4:29125945-29126124	51.3753	32.0301	-0.681648	0.557246	0.3283	0.837144
Ift88	14:57424061-57517936	1.73674	1.08298	-0.681368	0.708576	0.19095	0.737182
Dcun1d5	9:7184565-7207031	22.901	14.284	-0.681012	1.24942	0.03475	0.414631
Lage3	X:74351275-74353618	48.3407	30.1609	-0.68056	1.28993	0.033	0.405086
Zbtb44	9:31030643-31075879	6.45115	4.02573	-0.680306	1.68845	0.1825	0.728091
6720427I07Rik	13:48535522-48537822	2.20804	1.37802	-0.680173	0.522411	0.2196	0.763916
Prkd3	17:78949404-79020816	4.08916	2.55207	-0.680137	1.19863	0.0517	0.48598
Taf1a	1:183388980-183410198	6.76153	4.22096	-0.679777	0.915577	0.1135	0.636566
Dsn1	2:156995264-157007154	2.52278	1.57507	-0.679599	0.416802	0.51835	0.92021
Scn4b	9:45138436-45154152	140.777	87.8991	-0.679493	1.81775	0.04275	0.451015
Bmpr1a	14:34410733-34503341	16.5079	10.3086	-0.679315	1.54578	0.02975	0.387555
Gm14859	X:102208401-102208758	4.1733	2.60678	-0.678919	0.470816	0.41525	0.882371
Capza2	6:17636233-17666972	142.486	89.0158	-0.678692	1.42861	0.0723	0.549932
Adamtsl1	4:86053914-86428385	1.78385	1.11448	-0.678625	0.505336	0.1864	0.732578
Gm10311	8:69373527-69373914	3.33128	2.0822	-0.677967	0.475455	0.4127	0.880991
Polr1e	4:45018582-45084604	4.81551	3.01088	-0.677505	0.500239	0.39015	0.869993
Dennd1b	1:138963708-139176043	3.14058	1.96369	-0.677462	2.70403	0.02345	0.347762
Gm27404,Gm27645,Gm27761,Zeb2os	2:44983633-45117395	4.72646	2.95604	-0.677094	0.366845	0.5188	0.92026
Gm7985	12:71831077-71992367	23.4104	14.643	-0.676932	0.77894	0.16345	0.7074
Panx1	9:15005160-15045478	10.7229	6.70813	-0.676717	0.804751	0.1744	0.719586
Sc5d	9:42254176-42264300	9.78732	6.12337	-0.676587	1.37505	0.05385	0.493506
Fli1	9:32422203-32542861	1.76621	1.1051	-0.676477	0	1	1
Gm8349	3:61461858-61462861	96.8706	60.6162	-0.676354	1.4465	0.01205	0.25082
Trim55	3:19644473-19692421	39.6128	24.7964	-0.675837	1.06695	0.05535	0.4985
E130317F20Rik	10:79851380-79883174	1.87317	1.17327	-0.674954	0.314378	0.49805	0.91364
Senp2	16:22009483-22049269	7.14149	4.47413	-0.674619	1.4287	0.01875	0.313305
2310015B20Rik	10:70204663-70219711	140.348	87.9667	-0.673982	1.31474	0.02335	0.347011
Ampd1	3:103074013-103099714	382.811	239.938	-0.673967	1.06963	0.05585	0.500019
Cdan1,Ttbk2	2:120629125-120850604	5.944	3.72583	-0.673874	0.411173	0.31895	0.831612
Fcf1	12:84918147-84983303	8.83998	5.54201	-0.673634	0.407054	0.6026	0.943407
Slc44a1	4:53440412-53622478	9.01837	5.65579	-0.673139	1.20658	0.06845	0.539053
Leng8	7:4137038-4150374	50.7559	31.858	-0.671922	0.431409	0.45595	0.899178
Alg2	4:47465066-47474333	17.0486	10.7042	-0.671477	0.851419	0.2515	0.788134
Slc37a4	9:44398175-44402963	55.1926	34.6546	-0.67143	1.84024	0.0237	0.349508
Atp2a1	7:126428758-126463108	32390.2	20352.9	-0.670328	0.298467	0.40705	0.878262
Gm15531	6:97807057-98021349	2.35075	1.47857	-0.668919	0.118239	0.7373	0.970619
Gm8756	13:97434969-97497007	19.2903	12.1334	-0.668896	1.16365	0.0543	0.495098
Gm8459	6:122553800-122570849	26.0226	16.3685	-0.668843	1.1169	0.0532	0.491306
Dpp4	2:62330072-62470913	1.79688	1.13072	-0.66825	0.350841	0.3263	0.835882
Ociad2	5:73322198-73338947	27.1001	17.0569	-0.667944	1.12067	0.02725	0.372718
Gm6736	12:13269126-13583810	57.0407	35.9061	-0.667762	1.73031	0.05445	0.495701
Mms19	19:41933471-41981157	8.53435	5.373	-0.667553	0.261601	0.4047	0.877152
Mllt11	3:95181765-95228677	60.363	38.0305	-0.666509	1.13163	0.06185	0.519903
Ttc23	7:67647409-67726576	10.1962	6.42491	-0.666278	0.572068	0.3045	0.822464
Gm27477	6:52162124-52162267	17.492	11.024	-0.666044	1.54133	0.68645	0.962438
Rpl31-ps1	12:91890895-91891273	6.93607	4.37196	-0.665838	0.522483	0.3945	0.872303
Zfp229	17:21730794-21769342	2.75502	1.73688	-0.665565	0.319709	0.64485	0.9535
Gm5976	1:52503233-52504229	2.2487	1.41789	-0.665341	0.587943	0.3185	0.831288
Ttyh2	11:114675430-114720977	4.08574	2.57754	-0.664604	1.35192	0.04855	0.474962
Grem2	1:174833784-174921819	1.62807	1.02724	-0.664387	0.948248	0.1326	0.666121
Dcdc2b	4:129600667-129624059	2.88013	1.81725	-0.664376	0.154995	0.613	0.945827
Gm8100	8:28185839-28186827	11.6816	7.37221	-0.664073	0.950728	0.09765	0.607111
Micu3	8:40279165-40386308	6.36437	4.01679	-0.663973	1.9052	0.07785	0.565112
Tubgcp3	8:12614276-12679229	9.40016	5.93431	-0.663606	0.675519	0.1999	0.746099
Hrc	7:45335289-45338973	452.617	285.737	-0.663602	1.14036	0.0495	0.478515
Snx32	19:5495277-5510489	4.13796	2.61244	-0.66352	0.861909	0.13275	0.666416
2610203C20Rik	9:41376396-41617772	3.28039	2.07218	-0.662719	0.45329	0.4121	0.880749
Atp1b2	11:69599735-69605942	167.156	105.668	-0.661653	1.17888	0.03425	0.412003
Rspry1	8:94601954-94660275	2.09298	1.3244	-0.660228	1.50696	0.09055	0.59318
Copg1	6:87887813-87936629	19.3182	12.2249	-0.660132	0.765312	0.1837	0.729529
Gm13886	2:104820178-104821361	2.39354	1.5155	-0.659351	1.10612	0.1884	0.734343
Siae	9:37613846-37648318	1.80949	1.14594	-0.659051	1.32386	0.09325	0.598217
Ap1g1	8:109778553-109868455	10.3561	6.56537	-0.657536	0.932581	0.13465	0.669301
Elovl5	9:77917363-77984519	6.98222	4.42654	-0.657506	0.990819	0.05235	0.48837
Ube2t	1:134962564-134974162	4.535	2.87677	-0.656654	0.606181	0.32355	0.834239
Gm10762	2:128966592-129021756	29.1062	18.4672	-0.65636	1.16939	0.1197	0.646875
Gm8326	1:46414501-46416932	4.44793	2.82413	-0.655327	1.01025	0.085	0.581656
Pole4	6:82618991-82705365	10.5043	6.67067	-0.655083	0.957799	0.31055	0.826354
Gm8885	1:72087856-72088454	4.00495	2.54374	-0.654833	0.581848	0.3075	0.824401
Nfyc	4:120757437-120831572	18.2153	11.5714	-0.65458	0.767297	0.08875	0.589438
Clec2d	6:129180614-129186534	59.3722	37.7191	-0.654493	1.49305	0.02245	0.340686
Gm21967,Gm7120	13:119487260-119610458	25.3409	16.1003	-0.654379	1.19815	0.04165	0.446834
Sms	X:157443854-157492287	21.9398	13.9442	-0.653888	1.36362	0.01515	0.281371
Taf10	7:105732206-105744361	28.7438	18.272	-0.653614	0.474033	0.45225	0.89801
Skil	3:31095057-31122577	2.20884	1.40438	-0.65335	0.573795	0.26075	0.793578
Gm6644	1:55405920-55754285	88.6991	56.4181	-0.652762	2.01738	0.0275	0.374188
St3gal6	16:58408442-58524243	150.754	95.9768	-0.651437	0.797579	0.12215	0.650736
Epb4.1l5	1:119545036-119649000	3.28243	2.09125	-0.6504	0.480866	0.41695	0.883169
Atf7ip	6:136518801-136611038	9.92707	6.32468	-0.650376	0.141601	0.44015	0.89342
Atp6v0a1	11:101009451-101063719	38.0107	24.2183	-0.650308	0.642727	0.10085	0.613327
Gm14584	X:53418330-53418967	4.29915	2.73976	-0.649998	0.576002	0.3086	0.825107
Gm14845	X:101691544-101691850	35.1038	22.3833	-0.649207	0.740849	0.19495	0.741154
1110051M20Rik	2:91264973-91444704	12.9891	8.28228	-0.649203	0.189214	0.4756	0.906209
1700120C14Rik	15:99242817-99262044	45.3967	28.959	-0.648575	0.531368	0.3789	0.864902
Harbi1	2:91710851-91721545	6.5377	4.17144	-0.648236	0.425275	0.53895	0.926557
Amd2	10:35708690-35711891	23.6575	15.0968	-0.648055	1.77681	0.01735	0.30151
Ttc39c	18:12599925-12737050	1.71998	1.09786	-0.647689	0.483131	0.3306	0.838717
Tmem19	10:115340738-115362262	7.2509	4.62875	-0.647537	1.26563	0.0402	0.440199
Adamts1	16:85793826-85803113	12.6068	8.05007	-0.647128	1.14007	0.035	0.41591
Rasa4	5:136083915-136111860	27.5376	17.5843	-0.647121	0.986278	0.04545	0.462822
Gm13379	2:21341924-21830547	1.65367	1.05605	-0.64699	0.428291	0.3932	0.871584
Vasp	7:19256928-19271817	5.12918	3.27975	-0.645142	0.803856	0.14335	0.681871
Nmi	2:51948486-51973494	5.77204	3.69216	-0.644616	0.683335	0.2403	0.780404
Hr	14:70552211-70573548	11.8586	7.58782	-0.644171	0.465896	0.15415	0.696638
Gm7258	7:128595978-128596278	17.6551	11.2999	-0.643772	0.579992	0.33175	0.839468
Ap1s2	X:163909016-163933666	14.8675	9.52003	-0.643127	1.54987	0.0412	0.444708
Ikbip	10:91082939-91102607	7.75325	4.96534	-0.642909	0.890766	0.14945	0.690545
Zfp606	7:12478292-12496235	2.10939	1.35111	-0.642684	1.12051	0.1437	0.682458
Bivm	1:44118956-44144770	3.42924	2.19658	-0.642628	0.601379	0.1645	0.708803
Brcc3	X:75416627-75454001	5.53488	3.54548	-0.642572	0.442061	0.4486	0.896672
Cenpo	12:4133102-4240123	1.90689	1.22213	-0.641826	0.424382	0.5065	0.916398
Gm7204	16:48218604-48219204	85.029	54.526	-0.64101	2.41516	0.02535	0.361055
Gm5499	17:87078270-87079155	32.8376	21.0647	-0.640526	1.18574	0.04335	0.45343
Gm15675	1:130388536-130437914	4.50437	2.8901	-0.640207	1.70666	0.067	0.534833
Gm17377	17:55321613-55321820	4.26007	2.73347	-0.64014	0.723723	0.6488	0.954485
Polr3gl	3:96576983-96594181	20.7403	13.3128	-0.639619	1.08028	0.49925	0.914019
Tpd52-ps	8:79680265-79680824	7.5576	4.85202	-0.639344	0.658174	0.2633	0.79546
Osgin1	8:119434123-119446256	8.40729	5.39763	-0.639315	2.00027	0.04665	0.467316
Rbfox2	15:77078989-77307053	8.99214	5.77547	-0.638725	3.15958	0.0216	0.334766
Uchl4	9:64185769-64253631	12.2464	7.87073	-0.637787	0.476148	0.40825	0.878902
Ube2nl	7:61549242-61549701	4.25298	2.73365	-0.637645	0.535643	0.32535	0.835285
Gm4995	X:142533438-142533870	20.4075	13.1181	-0.637545	0.793428	0.1777	0.723273
Gm13268	2:14603087-14987908	27.058	17.3942	-0.637449	0.513772	0.38695	0.868663
Gm11652	11:105589985-105929304	5.30649	3.41294	-0.636745	0.683528	0.24575	0.784285
Gm11434	11:83800463-83801092	5.56057	3.57723	-0.636389	0.658616	0.26235	0.794845
Gm3699	10:43221485-43464882	727.736	468.323	-0.635912	0.192295	0.78045	0.97649
Zfp654	16:64780350-64786321	4.02962	2.594	-0.635465	2.38942	0.0445	0.458636
Asb15	6:24528143-24573164	30.2317	19.462	-0.635402	1.53355	0.01745	0.30236
Hps3	3:19957053-20035315	2.33186	1.50136	-0.635213	0.408179	0.5173	0.919762
Gm11401	11:6242377-6242721	35.0552	22.5716	-0.63512	0.766115	0.163	0.706971
Gm16570	12:81573556-81595008	3.61027	2.32499	-0.634881	0.277114	0.7306	0.96969
Ift57	16:49699232-49798870	2.15497	1.38832	-0.634333	0.505863	0.3822	0.866671
Polr3k	2:181864336-181870830	8.71118	5.61223	-0.634294	0.778416	0.0961	0.603861
2010320M18Rik	8:70776814-70777823	29.2792	18.8782	-0.63316	1.20688	0.0388	0.433232
Lsm14b	2:180024986-180035465	14.6688	9.45813	-0.633119	1.81884	0.0242	0.353082
Clec10a	11:70156196-70170834	8.56862	5.52539	-0.632988	0.502871	0.3461	0.847153
Immp1l	2:105904637-105965558	16.7339	10.7919	-0.632834	1.00794	0.07855	0.56698
Ces1f	8:93256235-93279747	7.15699	4.61628	-0.632625	0.782118	0.10815	0.627613
Gm4978	9:69450231-69451035	2.71393	1.75074	-0.632423	0.578596	0.3316	0.839385
1600020E01Rik	6:86524491-86564442	2.82431	1.82196	-0.632406	0.136713	0.7119	0.966679
Cul3	1:80264922-80340480	155.042	100.027	-0.63227	0.730713	0.21465	0.759749
Mid1ip1	X:10707175-10719690	21.1737	13.6613	-0.632177	0.813998	0.0928	0.597243
Foxj3	4:119530307-119629119	14.2609	9.20134	-0.632147	0.493581	0.2102	0.75597
4933434E20Rik	3:89999588-90068347	104.377	67.3529	-0.631996	0.838477	0.14955	0.69075
Gm12026	11:19383684-19384708	1.79559	1.15885	-0.631763	0.683844	0.3142	0.828706
Uevld	7:46923538-46958527	1.91598	1.23664	-0.631661	0.882424	0.1154	0.640075
Tbc1d8	1:39367841-39478755	7.22444	4.66347	-0.631481	0.448281	0.33805	0.842815
Zfp661	2:127574661-127587094	3.99888	2.58176	-0.631243	1.03129	0.08215	0.575294
Pex12	11:83294641-83405035	18.6612	12.0536	-0.630585	0.200491	0.58975	0.940378
Strn3	12:51608540-51738939	26.0456	16.8286	-0.630128	4.19939	0.04255	0.450204
Impad1	4:4762483-4793355	14.6472	9.46418	-0.630073	2.61988	0.0187	0.312904
Aurka	2:172356189-172370535	2.6922	1.74067	-0.629144	0.59713	0.21245	0.757896
Ermard	17:15041640-15074993	5.05795	3.27172	-0.628503	0.793535	0.1681	0.71284
Smc1a	X:152016427-152062694	15.0909	9.76879	-0.627423	0.585288	0.44645	0.895777
Gne	4:44034074-44084177	14.3529	9.29171	-0.627329	0.715602	0.19595	0.742178
0610010F05Rik	11:23564960-23633639	3.84188	2.4874	-0.627174	0.978407	0.07805	0.565716
Casp6	3:129901424-129914103	5.32661	3.44914	-0.626982	0.646433	0.32825	0.837143
A930033H14Rik	10:69151433-69291791	2.24633	1.45514	-0.626406	0.396499	0.52955	0.923846
Cwc27	13:104631139-104839274	4.90545	3.17805	-0.626243	0.482253	0.2505	0.787395
Tfap4	16:4544660-4559720	3.83598	2.48519	-0.626239	1.81388	0.08625	0.584298
Cul9	17:46442447-46831413	10.5311	6.82287	-0.626209	0.164372	0.42755	0.887913
Fen1	19:10198367-10207824	3.699	2.39861	-0.624937	0.927162	0.23795	0.778512
Gm13315	2:14603087-14987908	40.4152	26.2172	-0.624385	1.07162	0.0814	0.57362
Pik3cd	4:149649167-149702571	3.7308	2.42047	-0.624196	0.752999	0.07165	0.548199
Gm5389	X:57659731-57660907	150.753	97.8284	-0.623867	1.2843	0.03255	0.402732
Gspt1	16:11203382-11254270	25.6106	16.6203	-0.623798	0.801153	0.179	0.724654
Aaed1	13:64291835-64312710	14.4905	9.40439	-0.623701	0.941442	0.12015	0.647373
6330549D23Rik	3:96601132-96629820	6.37624	4.1399	-0.62311	0.756012	0.24885	0.786354
Zfp191	18:24009701-24020810	15.8093	10.2654	-0.622979	0.992431	0.1551	0.697598
Rps12l2	8:36025752-36026133	38.0022	24.6761	-0.62297	0.811194	0.1575	0.700639
Ankrd24	10:81628539-81647610	11.3812	7.39802	-0.621446	0.77604	0.13865	0.674987
Tnfrsf4	4:156013842-156016612	2.04558	1.32992	-0.621173	0.52456	0.32125	0.832802
4833418N02Rik	17:87274885-87282814	2.72218	1.76988	-0.621111	0.679083	0.32855	0.837323
Slc41a3	6:90604724-90646412	34.9049	22.6946	-0.62108	1.32295	0.02785	0.376367
Gm5069	1:180326969-180424802	26.8826	17.4792	-0.621029	0.700841	0.24825	0.786062
Cpeb1	7:81347025-81455465	37.7417	24.547	-0.620613	0.743711	0.1457	0.685291
Gm11295	13:22282352-22283548	2.49765	1.62466	-0.620436	0.495195	0.4604	0.900869
6430571L13Rik	9:107340601-107353986	13.326	8.67273	-0.619682	1.12402	0.0377	0.428394
4930402H24Rik	2:130706199-130906406	17.3618	11.2998	-0.619625	0.358546	0.47315	0.905327
Pigb	9:72958784-73042779	4.18039	2.72088	-0.619563	0.290925	0.57225	0.935836
Izumo4	10:80702692-80705382	1.75606	1.14315	-0.619328	0.510621	0.41505	0.882333
Prkab2	3:97658192-97674694	134.268	87.4192	-0.619099	1.23947	0.05825	0.507819
Ldoc1l	15:84553397-84557823	2.72804	1.77635	-0.618954	1.01146	0.08835	0.58868
Gm7701	18:24205343-24286818	20.7511	13.5121	-0.618936	0.610992	0.2959	0.816502
Gm12183	11:48751866-48753714	87.4657	56.9828	-0.61819	1.4664	0.03425	0.412003
Zfp788	7:41633202-41651534	4.9763	3.24371	-0.617427	0.868792	0.12855	0.66001
Cdkal1	13:29191745-29855674	4.87927	3.18076	-0.617295	0.826155	0.2733	0.802329
Ckm	7:19411093-19421583	31262.6	20379.9	-0.617293	0.474202	0.3491	0.848954
Usb1	8:95332291-95347507	4.40966	2.87469	-0.617263	0.763492	0.1619	0.705765
Cask	X:13517079-13851367	3.54546	2.31137	-0.617225	0.45631	0.4056	0.877551
Mark3	12:111574509-111656227	22.0579	14.3812	-0.617116	1.34051	0.0277	0.375333
Ggnbp1,Zbtb9	17:26973166-27036378	81.0584	52.8526	-0.616988	0.501454	0.3956	0.872969
5031420N21Rik	9:72958784-73042779	20.2634	13.2134	-0.616879	0.216091	0.8149	0.981152
Akap6	12:52699382-53151015	6.42924	4.19253	-0.616826	1.49906	0.0302	0.390198
Gm13215	4:132148412-132148884	15.0444	9.81138	-0.616702	0.734254	0.1967	0.743017
Xpnpep3	15:81400137-81456807	1.98615	1.29545	-0.616529	0.500923	0.4214	0.884974
Cog5	12:31654868-31950535	1.55781	1.01618	-0.61637	0.237342	0.74345	0.971472
Ptch1	13:63508327-63573598	2.52912	1.6498	-0.616346	0.492272	0.1745	0.71968
Gm8330	10:13890645-13891653	9.26562	6.04661	-0.615762	0.826734	0.1522	0.694384
Gm5575	5:24209326-24209724	41.9721	27.3985	-0.615332	0.94046	0.09645	0.604633
Rara	11:98927817-98974942	12.0634	7.87654	-0.615	0.356724	0.62015	0.947755
RP24-97D20.2	3:84160438-84305446	2.24723	1.46761	-0.614684	0.448458	0.43195	0.890117
Fyttd1	16:32821702-32908963	31.0585	20.2853	-0.614552	0.538312	0.41245	0.880901
Bms1	6:118383382-118419417	8.82148	5.76191	-0.614474	1.25149	0.02935	0.385402
A830039N20Rik	14:23289430-24004859	4.79789	3.13529	-0.613802	1.73464	0.30975	0.825711
Zbtb18	1:177428337-177450764	52.98	34.6316	-0.613358	0.425619	0.6386	0.952029
Camk2g	14:20734874-20794088	76.4115	49.9626	-0.61294	1.24127	0.03405	0.411203
WI1-1003N17.1	1:191997204-192151026	703.97	460.379	-0.612693	1.28292	0.04185	0.447666
Gm2193	8:41608667-41609669	23.6729	15.483	-0.61255	1.06699	0.05455	0.495897
Pygm	19:6384398-6398459	4538.35	2968.83	-0.612274	0.479916	0.2814	0.807273
Stam2	2:52691663-52742281	2.91715	1.91018	-0.610848	0.952604	0.06635	0.532875
Rnmt	18:68300354-68324852	19.0554	12.4792	-0.61068	0.772641	0.1899	0.735919
Cox20-ps	7:100545750-100641268	18.6735	12.2292	-0.610656	0.20344	0.7831	0.97685
Afap1l1	18:61726389-61786702	12.1375	7.94968	-0.610502	1.17123	0.05005	0.480121
Rpp40	13:35893471-35906359	23.3827	15.3149	-0.610501	0.3807	0.552	0.930497
Gm3555	1:98421123-98516991	2.25885	1.4799	-0.610093	0.661686	0.22765	0.771035
Zfp68	5:138604615-138619761	11.9294	7.81815	-0.609618	1.24247	0.04335	0.45343
Ankrd28	14:31700014-31830415	9.40637	6.16556	-0.609405	2.45052	0.0295	0.386202
Itga4	2:79255425-79461107	1.93346	1.26734	-0.609381	1.06184	0.05875	0.50965
Ube2v2	16:15552676-15594524	8.78837	5.7611	-0.609252	0.969354	0.20905	0.754689
Gm18737	17:37860806-37861743	7.22871	4.74222	-0.608176	0.825715	0.18725	0.733027
Smoc2	17:14279505-14404790	50.5091	33.1447	-0.607766	1.54613	0.0316	0.397537
Slco5a1	1:12866548-12992650	4.18414	2.74613	-0.607532	1.53084	0.0353	0.417147
Cbfa2t2	2:154436480-154539356	8.38834	5.50565	-0.607473	0.411536	0.50405	0.91553
Cwc25	11:97745480-97766556	3.7531	2.46653	-0.605596	0.939499	0.25565	0.791027
Gm11222	4:69853946-69854684	3.58588	2.35844	-0.604495	0.848855	0.2773	0.804835
Cd59b	2:104069848-104091187	3.72797	2.45204	-0.604406	0.44098	0.4468	0.895915
D2hgdh	1:93824908-93852348	18.0749	11.889	-0.604357	0.399698	0.3387	0.843059
1110019D14Rik	6:13871525-14044373	2.58027	1.69773	-0.603915	0.603688	0.2779	0.805403
Slc25a15	8:22375553-22398621	4.07653	2.68235	-0.603842	1.95308	0.0599	0.513483
Ppil3	1:58430993-58505109	13.9146	9.15594	-0.603815	0.413285	0.57355	0.936138
Vwa7	17:35016578-35028016	2.98037	1.96192	-0.603225	1.1839	0.07725	0.563512
Polr3h	15:81872308-81926213	4.1745	2.74807	-0.603185	0.0944156	0.68685	0.962443
Gm29487	1:131285250-131527352	4.07223	2.681	-0.603049	0.118107	0.7603	0.973993
Hint3	10:30608140-30618479	48.3485	31.8457	-0.602375	0.941224	0.113	0.63554
Gm8318	15:18078136-18165988	122.485	80.6849	-0.602239	1.25348	0.0319	0.398794
Aimp1	3:132660497-132683879	66.0582	43.5203	-0.60205	1.33372	0.02835	0.379477
Cirbp	10:80165984-80172786	29.8991	19.699	-0.601977	1.04762	0.1304	0.662978
Tlcd2	11:75461538-75470899	34.422	22.6829	-0.601725	0.966793	0.0713	0.547172
BC065397,Gm15009	X:136732941-136803364	2.09448	1.38023	-0.601682	0.0614219	0.60225	0.943357
Tigd4	3:84496092-85887518	3.74579	2.46873	-0.601502	0.319578	0.6068	0.944254
Gm12751	4:34354042-34354423	48.7451	32.1264	-0.601499	0.916909	0.1173	0.642722
Osbpl8	10:111164801-111297247	1.61557	1.06494	-0.601263	1.59079	0.08455	0.580923
Gm13422	2:23207475-23267129	209.771	138.334	-0.600663	1.2389	0.0323	0.40121
Gm8116	9:78820637-78821838	84.6371	55.8225	-0.600443	1.29051	0.02905	0.383666
Dmxl1	18:49832669-49965473	2.56152	1.68954	-0.600366	1.35733	0.04035	0.440741
RP23-389J8.3	3:65506276-65506637	292.839	193.169	-0.600242	1.13162	0.04345	0.453953
Hnrnpr	4:136310941-136345981	10.3198	6.80788	-0.600141	0.427372	0.23735	0.778051
Pttg1	11:43420249-43426251	109.599	72.3065	-0.600034	0.95911	0.09755	0.606915
Smad3	9:63646766-63757994	20.1841	13.3167	-0.599979	1.26061	0.02145	0.333844
Gm5528	1:71958997-72038731	1.78003	1.17449	-0.599867	0.410348	0.51075	0.917982
Wrb	16:96145406-96157852	5.12927	3.38443	-0.599838	0.486954	0.4833	0.908856
Atrx	X:105797614-105929397	12.5252	8.26472	-0.599795	0.403949	0.31245	0.827605
Acyp2	11:30505990-30649587	91.2742	60.2325	-0.599665	1.14025	0.0505	0.481821
Ptprs	17:56412430-56476483	3.96897	2.61926	-0.599604	1.13422	0.0517	0.48598
Klhl11	11:100462613-100472741	2.0713	1.36724	-0.599267	0.729715	0.19195	0.738251
Neb	2:52136646-52338798	1258.27	830.595	-0.599228	0.519355	0.3088	0.825221
Gm7079	X:8042942-8074760	165.673	109.364	-0.599197	0.345426	0.55145	0.930369
Ccdc146	5:21292960-21424677	5.08775	3.36031	-0.598435	0.42712	0.4384	0.892902
Ireb2	9:54863754-54912534	4.28033	2.82744	-0.598224	1.5387	0.0513	0.484468
Bola1	3:96196587-96220308	72.7679	48.0681	-0.598222	1.18591	0.04725	0.469904
Kcnc4	3:107438302-107458898	43.8753	28.9936	-0.597672	1.62378	0.0365	0.423262
Gm6505	3:28697902-28781108	12.5818	8.32147	-0.596426	0.506159	0.28155	0.807405
Gm11453	2:162982254-162983261	11.5707	7.65352	-0.596284	0.880101	0.13595	0.671082
Dusp10	1:184013301-184075636	10.1761	6.73127	-0.596237	1.90612	0.04185	0.447666
Sox6	7:115471343-116038744	19.1659	12.6792	-0.596077	2.11955	0.03405	0.411203
Uggt2	14:118985038-119115074	4.76277	3.15133	-0.595842	1	0.2084	0.754293
Gm6578	6:12099517-12109583	2.30379	1.52523	-0.594976	0.557267	0.358	0.853686
Chmp3	6:71543796-71582609	54.8314	36.3057	-0.594804	0.478053	0.44185	0.894076
Gm7308	6:127282062-127282509	70.4644	46.6624	-0.594634	1.06585	0.07245	0.550376
Ctnna3	10:63430097-65003667	4.08974	2.70862	-0.59445	0.936568	0.11235	0.634374
Rtkn	6:83135462-83156397	6.94942	4.60281	-0.594378	0.818338	0.15485	0.697315
Gstt1	10:75783812-75798584	20.2036	13.3834	-0.594168	1.02456	0.10115	0.614129
Gm11989	11:8383181-8383853	4.16786	2.7612	-0.594012	0.565112	0.32215	0.833414
Gm15013	X:139684995-139753405	4.58337	3.03972	-0.592471	0.403075	0.52995	0.923943
Gm12419	4:84884308-85131921	34.4402	22.8443	-0.59226	0.819083	0.1666	0.71114
Git2	5:114727406-114806200	11.648	7.72652	-0.592194	0.311949	0.5047	0.915698
Rarb	14:16430841-16575472	2.73308	1.81319	-0.591998	0.794795	0.1559	0.698398
Aldoa	7:126795233-126800751	15499.6	10283.8	-0.591859	0.441545	0.32085	0.832605
Casq1	1:172209893-172219868	1862.94	1236.83	-0.590931	0.642554	0.29555	0.816334
Zfp146	7:30161273-30169727	20.171	13.3929	-0.590812	1.20495	0.04245	0.449772
RP24-286C21.2	1:184610279-184629473	9.41073	6.2501	-0.590428	0.608681	0.3041	0.822158
Osbp	19:11965843-11994105	20.7261	13.7661	-0.590326	1.74899	0.0294	0.385705
Gm5867	5:69461150-69461741	6.74138	4.47836	-0.590072	0.723712	0.27045	0.80059
Taco1	11:106065076-106073612	32.4473	21.5564	-0.58998	1.2211	0.03545	0.417728
Amfr	8:93971587-94012663	113.193	75.2036	-0.589907	0.507069	0.4559	0.899165
Gm8806	X:80533744-80535151	19.7936	13.1507	-0.5899	1.24311	0.06255	0.521984
Dusp6	10:99263230-99267488	3.92968	2.61172	-0.589414	1.0779	0.10515	0.621585
Hyou1	9:44379489-44392369	5.64898	3.75493	-0.589206	0.770848	0.1001	0.6118
Atp5o,Donson	16:91647505-91962915	397.121	263.979	-0.589155	0.501593	0.4084	0.879017
Zkscan7	9:122885079-122903184	1.68773	1.12191	-0.589131	0.833061	0.20695	0.753082
Gm5614	9:35281517-35281835	11.9501	7.94488	-0.58893	0.447693	0.44025	0.893462
Macrod1	19:7056767-7198061	108.266	71.9808	-0.588892	1.3684	0.03735	0.426994
Tstd2	4:46038934-46196311	4.80659	3.1959	-0.588793	0.0831307	0.6309	0.950115
Usp45	4:21727700-21837872	4.68721	3.11692	-0.588612	0.557115	0.1293	0.661119
Jph1	1:16898184-17097889	73.197	48.694	-0.58804	2.51197	0.05925	0.511097
Hivep2	10:13966074-14154446	9.50787	6.32521	-0.58801	1.04522	0.02935	0.385402
Sos1	17:80393751-80480453	2.81121	1.87037	-0.587869	1.55646	0.05025	0.48079
Gm20563	13:62006665-62006941	148.696	98.9326	-0.58785	0.949779	0.09765	0.607111
Myoz3	18:60576315-60591788	25.6538	17.0725	-0.5875	1.07287	0.0714	0.547444
Satb1	17:51736186-51834723	24.2619	16.1487	-0.58728	0.879671	0.0747	0.556544
Gm12337	11:75427752-75428152	3.56834	2.37537	-0.587102	0.423483	0.44525	0.895326
Slc6a13	6:121300226-121337733	1.64295	1.09425	-0.586342	0.536185	0.3135	0.828273
Gm13651	2:77291330-77292440	5.71198	3.808	-0.584957	0.739311	0.20395	0.75003
Tmem56	3:121201760-121283098	9.87525	6.5863	-0.584349	1.74804	0.027	0.371425
Best3	10:116986313-117025040	8.91259	5.94551	-0.584043	1.10509	0.05745	0.505336
Mob1b	5:88720854-88762058	3.38637	2.26001	-0.583409	1.63932	0.10085	0.613327
Erp44	4:48193322-48279558	14.2054	9.48458	-0.582786	0.546927	0.35605	0.852801
Pkia	3:7366668-7445366	175.951	117.496	-0.582563	1.37677	0.11345	0.636534
0610040J01Rik	5:63812494-63899619	10.8385	7.23773	-0.582551	1.03096	0.0685	0.539219
Abcd2	15:91145883-91191807	12.5984	8.41307	-0.58254	1.43992	0.0339	0.410282
Gm7008	12:40201566-40248504	2.35526	1.57312	-0.582252	0.219658	0.69385	0.963595
Trmt6	2:132804206-132816055	4.5074	3.01072	-0.582187	0.78182	0.1159	0.640693
Gm2986	5:93181932-93206495	7.37834	4.92857	-0.582127	0.169255	0.7905	0.977947
Srsf6	2:162931527-162937121	30.9398	20.6791	-0.58129	1.24988	0.0585	0.508713
Gm5113	7:30169874-30180209	2.81451	1.88159	-0.580935	2.44906	0.10865	0.628518
Fam198b	3:79859292-79946280	1.52517	1.01972	-0.580803	0	1	1
Zfp710	7:80024813-80092751	3.9564	2.6453	-0.580756	3.60095	0.05695	0.503768
Rps12-ps19	11:74898070-75164448	10.1963	6.81842	-0.580539	0.175418	0.8051	0.980048
Gm13410	2:24178833-24180317	4.97285	3.3255	-0.580502	0.736542	0.21535	0.760316
Prepl	17:85028346-85090267	4.86351	3.25287	-0.580287	0.980338	0.0849	0.58157
Gm14148	2:151374007-151375047	15.909	10.6426	-0.57999	0.93117	0.0992	0.609971
Prmt3	7:49778345-49858265	8.75702	5.85902	-0.579779	0.678009	0.2183	0.762805
Arfgef1	1:10137570-10232670	25.6037	17.1347	-0.579432	0.534103	0.30835	0.825006
Mipol1,Prps1l3	12:57230411-57497199	25.4175	17.0143	-0.579074	1.15121	0.0474	0.470529
Fzd7	1:59482423-59486955	22.9441	15.3603	-0.578915	1.4634	0.032	0.399361
Ache	5:137287518-137294466	23.2125	15.5417	-0.578754	1.03632	0.0382	0.430388
Gm13194	2:4942173-4942484	4.21232	2.82072	-0.578553	0.383508	0.51665	0.919593
Pde4a	9:21165713-21213248	13.0314	8.7277	-0.578323	1.18811	0.0472	0.46977
Zfand6	7:84615053-84679361	34.0944	22.8377	-0.578116	1.45885	0.03885	0.433491
Cwc15	9:14500616-14510577	65.444	43.8576	-0.577435	1.36159	0.0369	0.42486
Bud31	5:145140361-145167108	39.5792	26.5247	-0.577402	0.667726	0.30795	0.824674
Gm12444	4:46243013-46243890	17.7833	11.9206	-0.577065	0.941683	0.1049	0.621102
Nes	3:87971077-87980451	6.39083	4.28411	-0.577009	1.14653	0.04105	0.443989
Ppp1r2-ps1	17:6310546-6493180	8.62441	5.78157	-0.576965	0.351565	0.60345	0.943552
Mrpl22	11:58171660-58179565	25.0561	16.7996	-0.576736	0.934512	0.13615	0.671313
Htatsf1	X:57053582-57067183	59.5412	39.9249	-0.576599	1.25314	0.0427	0.450832
2510009E07Rik	16:21649044-21694665	8.91393	5.97886	-0.576192	2.67251	0.03785	0.429051
Taf13	3:108571697-108583222	13.5701	9.10432	-0.575806	1.1696	0.06545	0.530274
Mtcp1	X:75404845-75416588	7.58664	5.09059	-0.575628	0.579864	0.3043	0.822299
Gm8659	X:158150095-158151179	129.737	87.0537	-0.57561	1.40682	0.03725	0.426597
Nudt19	7:35547184-35556935	80.4241	53.969	-0.575495	0.978545	0.0942	0.599933
Mlxipl	5:135106890-135138382	45.66	30.6648	-0.574347	0.668484	0.3576	0.853446
Gm12565	3:37599423-37600072	3.10992	2.08975	-0.573551	0.529606	0.4094	0.879574
Nedd1	10:92684745-92722420	6.51124	4.37557	-0.573463	1.0815	0.06915	0.540988
Gm5778	10:73099341-74649737	17.5891	11.824	-0.572962	0.950244	0.08815	0.588221
Smg7	1:152836994-152902646	12.4627	8.37989	-0.572614	0.550011	0.48265	0.908605
Rrn3	16:13780698-13814840	8.91618	5.99549	-0.572548	4.67127	0.04545	0.462822
RP24-487F9.1	3:22076651-22216594	1.57802	1.06112	-0.572522	0.231979	0.7926	0.978313
Mospd3	5:137596644-137601058	9.69396	6.52012	-0.572189	0.651839	0.23345	0.775319
Phyh	2:4919018-4938730	127.303	85.6518	-0.571707	1.08022	0.0387	0.432686
Gm11953	11:3937540-3980004	37.9369	25.5288	-0.571477	0.763831	0.1984	0.744609
Acp2	2:91202884-91236982	8.52707	5.74196	-0.570506	0.30675	0.23835	0.778802
Me1	9:86581370-86701253	71.633	48.2389	-0.570428	1.19274	0.04625	0.465776
Setd4	16:93583456-93604063	2.59819	1.74969	-0.570411	0.407713	0.50115	0.914676
Ppic	18:53406340-53418007	14.8538	10.0032	-0.570373	0.979317	0.09345	0.598419
Gm12929	4:126476301-126476671	22.3149	15.0299	-0.570175	0.633342	0.2535	0.78956
Zfp180	7:24081923-24107698	7.59679	5.11698	-0.570098	1.21606	0.05015	0.4804
Tfdp1	8:13339673-13377702	12.8602	8.66329	-0.569922	1.04035	0.08605	0.583899
1300002E11Rik	16:21794346-21809037	2.60872	1.75751	-0.569807	0	1	1
Slc6a9	4:117834505-117883487	3.33515	2.24788	-0.56919	0.436004	0.22425	0.768126
Atg12	18:46732416-46741579	8.84184	5.95979	-0.569086	3.87031	0.0589	0.510168
4833420G17Rik	13:119462758-119486117	6.2319	4.20081	-0.569004	0.970087	0.0808	0.572172
Zfp715	7:43296196-43313294	6.04623	4.07568	-0.568994	0.883044	0.0759	0.560155
Gm12094	11:29692946-30026033	5.17523	3.49049	-0.568193	0.0570396	0.73065	0.969697
Topbp1	9:103305214-103350428	2.82586	1.90624	-0.56796	0.283289	0.51615	0.919458
Cisd2	3:135406411-135423925	16.0576	10.8371	-0.567277	1.52407	0.0419	0.447707
Tha1	11:117867951-117887416	4.68914	3.16554	-0.566873	0.680887	0.1816	0.72728
Gm12380	4:38263917-38264461	1.80796	1.22077	-0.566575	0.365384	0.51385	0.918778
Zfp874b	13:67471513-67484225	3.34824	2.26113	-0.566357	1.96445	0.0973	0.606371
Fam204a	19:60198585-60227678	6.856	4.63214	-0.565688	0.896597	0.11175	0.633568
Gm11759	2:145167753-145642166	3.45019	2.33139	-0.565483	0.212025	0.6588	0.956851
Oaz2	9:65668000-65690300	66.5989	45.0068	-0.565354	1.71516	0.04455	0.458822
Gm12244	11:57880895-57881186	8.83921	5.97359	-0.56532	0.384307	0.5142	0.918919
Uba2	7:34140688-34169599	40.5982	27.4376	-0.56526	0.811524	0.16225	0.706176
Haghl	17:25773775-25785673	7.99736	5.40588	-0.564993	0.417812	0.54385	0.928119
Tpp2	1:43933646-44003000	13.0628	8.83495	-0.564172	0.614263	0.2176	0.762145
Cpd	11:76778423-76847018	8.49042	5.74567	-0.563361	0.683048	0.04445	0.4584
Cav3	6:112459500-112472871	43.2961	29.3012	-0.56328	1.13812	0.0483	0.474222
Gm5828	1:16768278-16770138	4.53842	3.0719	-0.563061	0.789868	0.1571	0.700121
Gm13545	2:58267452-58357895	4.8061	3.25313	-0.563041	0.212206	0.6207	0.947826
Slc39a1	3:90248171-90253612	13.6967	9.27581	-0.56228	2.39241	0.04305	0.452221
Tmem62	2:120977016-121007852	1.71659	1.16261	-0.562175	0.399157	0.3605	0.854948
Gm13416	2:24592901-24594513	29.221	19.7974	-0.561696	1.25977	0.04405	0.456676
Erbb3	10:128567522-128589652	1.49021	1.00967	-0.561639	0.823212	0.1501	0.691551
Sema6d	2:124089968-124667770	4.39992	2.98119	-0.561591	1.35479	0.0529	0.490371
Gm12138	11:40672905-40673856	57.3391	38.8542	-0.561448	1.76089	0.0466	0.467217
Brms1l	12:55836365-55869735	6.01985	4.07963	-0.561289	1.0852	0.0895	0.590955
ZNF383	7:29908222-29916813	4.6422	3.14722	-0.560728	1.0111	0.11635	0.641203
Apip	2:103073674-103092644	53.9293	36.5639	-0.560649	0.483669	0.39885	0.874548
Gm12612	11:60669139-60671125	3.04926	2.06775	-0.560395	0.754286	0.2173	0.762118
Rab3ip	10:116905783-116950380	11.2039	7.59802	-0.560302	1.07621	0.06875	0.539967
Lamtor1	7:101881324-101933895	51.92	35.2165	-0.560038	1.01956	0.0813	0.57336
Gm15730	5:8037293-8069379	9.50184	6.44515	-0.559994	0.248737	0.71215	0.966685
Rps15a-ps8	4:53791069-53791456	1.56115	1.05962	-0.559063	0.358793	0.63005	0.949945
Gm9522	15:39180510-39181441	17.949	12.1853	-0.558768	0.919426	0.1379	0.673835
Stac3	10:127501685-127508823	264.66	179.682	-0.558696	0.693779	0.2262	0.769881
Gm6292	X:105140848-105141943	1.76848	1.20087	-0.558431	0.474434	0.37355	0.861982
Acvr1	2:58388643-58567157	5.94517	4.03724	-0.558351	1.00498	0.079	0.56805
Tiam1	16:89787110-89980080	2.37597	1.61367	-0.558172	0.352842	0.3109	0.826576
Gpam	19:55069733-55099451	47.4488	32.2331	-0.55783	1.13481	0.0503	0.480922
Rps12	10:23785210-23787195	31.9521	21.7101	-0.557545	0.76963	0.1682	0.712972
Gm13534	2:58108059-58108572	3.75157	2.54912	-0.557494	0.474015	0.38435	0.867566
Mfn1	3:32529464-32579239	126.294	85.8254	-0.557304	0.332212	0.5444	0.928164
Gbp3	3:142560051-142573209	2.60028	1.76727	-0.557145	0.419532	0.34985	0.849193
1700113H08Rik	10:87058044-87230589	1.488	1.01133	-0.55712	0.378649	0.5111	0.918133
Dmd	X:82948869-85206141	20.5275	13.9574	-0.55653	0.683086	0.14935	0.690485
Gm8864	X:88572050-88573060	7.37053	5.0119	-0.55641	0.731771	0.1932	0.739571
Plxdc2	2:16356303-16755839	7.99384	5.43635	-0.55625	0.577256	0.369	0.859841
Rps2-ps4	11:53645743-53646376	3.32387	2.2608	-0.556031	0.503472	0.3891	0.869603
Sfxn2	19:46573364-46596898	2.18608	1.48692	-0.556012	0.763041	0.17375	0.718734
Hdac2	10:36974543-37001889	15.2228	10.3543	-0.556011	0.644785	0.30525	0.823004
Maged2	X:150806369-150814345	9.70111	6.59926	-0.555846	0.635058	0.25265	0.788996
Gm17199	7:29833619-29859025	10.0791	6.85656	-0.555816	0.43304	0.454	0.898532
Smc5	19:23206440-23273897	1.86954	1.27188	-0.555718	1.09117	0.1328	0.666541
Gm9164	X:103887598-103888612	8.43818	5.74074	-0.555695	0.75315	0.18725	0.733027
Gm5070	3:95410345-95411207	4.85908	3.30787	-0.554783	0.643303	0.32925	0.837715
Utp18	11:93859242-93885766	1.50905	1.02736	-0.554702	0.590908	0.35685	0.853135
Lysmd3	13:81657805-81671888	1.91113	1.30117	-0.554613	0.941485	0.199	0.745127
Mbip	12:56328305-56345894	4.0719	2.77248	-0.554525	0.721734	0.2219	0.765955
Gm5210	15:8917797-8929171	20.0992	13.6901	-0.554007	0.898681	0.1116	0.633411
Uba3	6:97183669-97205642	6.16126	4.19731	-0.553759	4.62215	0.0916	0.595117
Tspan17	13:54789376-54796776	8.02508	5.46793	-0.553521	0.606028	0.26335	0.795547
Adck2,Ndufb2	6:39573872-39725463	258.018	175.924	-0.552521	0.910139	0.12805	0.65925
Zfp14	7:30038052-30044734	3.11033	2.12091	-0.552386	0.680457	0.27115	0.800875
2010315B03Rik	9:124291803-124312696	3.59143	2.44921	-0.552244	0.612257	0.39695	0.873713
Snap23	2:120567670-120601255	13.911	9.48823	-0.552018	0.676576	0.11035	0.631229
Calm2	17:87433411-87446935	72.6925	49.5966	-0.551566	1.14477	0.0911	0.593932
Kcnc3	7:44590663-44604754	3.11133	2.12299	-0.551435	0.890892	0.11885	0.645342
Rhoq	17:86963081-87025406	61.4168	41.909	-0.551372	1.23441	0.05385	0.493506
Tmem242	17:5388762-5440259	113.318	77.3624	-0.550674	1.18714	0.04045	0.441316
Tab3	X:85574021-85634469	1.70967	1.16761	-0.550157	0.54809	0.19865	0.744827
Mtx3	13:92844786-92858230	2.39444	1.63557	-0.549897	1.45358	0.08935	0.590703
Taz	X:74273216-74290151	66.7714	45.6184	-0.549615	0.427073	0.38505	0.868031
Psip1	4:83417723-83486459	8.66113	5.91825	-0.549385	0.580476	0.294	0.815298
Dusp14	11:84048040-84069261	6.77762	4.63148	-0.549306	0.747065	0.2003	0.746351
Dopey2	16:93711906-93810585	6.81218	4.65542	-0.549208	1.15765	0.0486	0.475177
Dph3	14:32080565-32103202	134.651	92.0493	-0.548741	0.813232	0.18855	0.73446
Gm11868	4:18407348-19122526	13.6023	9.30149	-0.548316	0.953195	0.0962	0.604092
Amdhd2	17:24155832-24163766	9.05277	6.19123	-0.548134	0.615992	0.3173	0.83043
Lyrm7	11:54826865-54860916	6.46764	4.42341	-0.548081	0.453473	0.2911	0.813405
Gm13835	6:31093558-31218474	278.343	190.369	-0.548065	1.17376	0.04715	0.469636
Gm10269	18:20682591-20682963	179.335	122.663	-0.547954	1.08893	0.05135	0.48456
5730455P16Rik	11:80360491-80378034	24.5766	16.8115	-0.547836	0.693401	0.10465	0.620411
Atxn1	13:45549757-45964991	3.86931	2.64685	-0.547804	2.43159	0.04865	0.475254
Ifih1	2:62595797-62646255	1.80334	1.23375	-0.54762	0.649137	0.2189	0.763341
Bhlhe41	6:145858242-145865558	11.9914	8.20492	-0.547441	0.617917	0.63415	0.950937
Ppp4r1	17:65782572-65841926	10.7939	7.38582	-0.547389	0.434547	0.3937	0.871811
Pms2,Rsph10b	5:143909963-143985719	3.77732	2.58512	-0.547133	0.516089	0.2238	0.767798
Tspan8	10:115817283-115849893	40.014	27.3866	-0.547036	1.3619	0.0597	0.512748
Zfp462	4:54945047-55083563	3.53962	2.4229	-0.546858	0.262254	0.49255	0.912012
Atg4c	4:99193933-99259787	2.70752	1.8537	-0.546565	0.499404	0.32775	0.836791
Ogg1	6:113326971-113343984	6.01808	4.12035	-0.546537	0.477978	0.398	0.87415
Abhd3	18:10644410-10706771	1.73639	1.18891	-0.546453	0.462965	0.48985	0.911228
Gm4891	8:80933533-80938667	5.00618	3.42885	-0.545985	0.600944	0.2866	0.810628
Pdcl	2:37350073-37359332	3.32576	2.2781	-0.545852	0.982038	0.28495	0.809525
Golt1b	6:142387220-142403858	4.43921	3.0413	-0.545614	0	1	1
Nab1	1:52457293-52500679	7.13759	4.89117	-0.545257	0.39342	0.4444	0.895076
Il17rc	6:113471426-113483140	1.65765	1.13609	-0.545063	0.212057	0.53835	0.926397
Tpt1-ps5	9:37696514-37697033	146.054	100.202	-0.543591	1.13676	0.05185	0.486727
Nanp,Ninl	2:150934518-151039398	4.65658	3.19506	-0.54343	0.668201	0.24615	0.784591
Gm12482	4:52814603-52828269	9.24017	6.34153	-0.543089	0.641701	0.25775	0.791832
Kctd9	14:67715936-67742310	12.9666	8.9035	-0.542352	2.06442	0.05155	0.485341
Ppp3cb	14:20499363-20618354	125.179	85.9601	-0.54225	0.519589	0.1171	0.642476
Asnsd1,Gm28551	1:53297094-53352752	56.3883	38.7222	-0.542237	1.30436	0.08735	0.586812
Gm6155	7:84834538-84834879	60.3485	41.4487	-0.541993	0.771913	0.1799	0.725367
Cbx3	6:51470359-51483704	6.52294	4.48011	-0.541989	1.79266	0.16235	0.70633
Senp3	11:69673114-69682084	18.9741	13.0366	-0.54147	0.824597	0.10075	0.613109
Cmtr2	8:110215664-110224486	2.0095	1.3808	-0.54133	1.72117	0.2032	0.749128
Cryz	3:154576430-154623182	5.41492	3.72133	-0.541119	0.537729	0.24545	0.78408
Nmt2	2:3284211-3328877	3.39312	2.33211	-0.540977	1.50048	0.10545	0.622076
Gm8976	1:152949394-152950097	3.04923	2.09616	-0.540699	0.497537	0.40515	0.877382
Exd2	12:80463094-80498135	13.0889	8.99808	-0.540656	1.23303	0.04905	0.476688
Cox11	11:90638172-90688366	11.0286	7.58483	-0.540061	0.711701	0.23595	0.777105
Ccdc142,Mrpl53	6:83101616-83109939	137.077	94.2753	-0.540038	1.16759	0.06615	0.532278
Hist1h2bh	13:23542969-23543357	12.5477	8.63015	-0.53996	0.543286	0.3665	0.858546
Gm14138	2:119172499-119217049	7.62804	5.24733	-0.539729	0.425634	0.4794	0.907371
Hoxa4	6:52162510-52221854	5.76896	3.9685	-0.539719	0.347855	0.5199	0.920599
Gm12988	4:135756217-135756695	48.5109	33.375	-0.539541	0.873617	0.123	0.651808
5830454E08Rik	9:120577345-120578072	2.75655	1.8968	-0.539294	0.487315	0.3979	0.874121
Rdm1	11:101627194-101636100	25.1584	17.3122	-0.539252	0.777615	0.1706	0.715431
2310040G24Rik	6:86483375-86488227	213.64	147.042	-0.538947	1.05268	0.07345	0.552969
Hiatl1	13:65064662-65112982	4.07208	2.80319	-0.538698	0.429566	0.3798	0.865277
Gm14539	X:20581140-20581314	3898.81	2684.5	-0.538381	1.08811	0.08615	0.584056
Dcaf5	12:80335846-80436601	13.2319	9.11653	-0.537469	1.43154	0.04615	0.465486
Ccl8	11:82115184-82116799	2.48991	1.71569	-0.537308	0.330658	0.58025	0.937951
Iqcj,SCHIP1,Schip1	3:67892219-68626481	20.131	13.8739	-0.537053	3.74352	0.0565	0.502351
Gm19807	17:37130908-37131575	4.74183	3.26846	-0.536836	0.535558	0.33145	0.839222
Zfp367	13:64133021-64153202	8.61718	5.94005	-0.536741	0.934366	0.0789	0.567824
Pi4kb	3:94974730-95015448	19.8294	13.6703	-0.536596	0.429102	0.51065	0.917927
4933411K16Rik,Hoga1	19:42045609-42070953	3.45722	2.38341	-0.536582	0.481929	0.354	0.851557
Mreg	1:72159441-72212307	16.7956	11.5804	-0.536393	2.1391	0.0573	0.504815
Sec23a	12:58953094-59012017	31.6986	21.8571	-0.536316	0.522677	0.41125	0.880306
Gm6542	18:36559986-36665917	77.9318	53.7431	-0.536133	0.751689	0.19355	0.739953
Cul5	9:53614581-53681265	19.2598	13.286	-0.535679	0.95366	0.08635	0.584477
Dynll2	11:87979524-87987533	126.942	87.5954	-0.535242	1.16123	0.0907	0.593297
Etv5	16:22381308-22439719	2.4425	1.68561	-0.535087	0.331952	0.5277	0.923268
Zfp454	11:50872719-50887651	1.8925	1.3062	-0.534919	0.552871	0.302	0.820391
Snx25	8:46033260-46195590	4.03589	2.78631	-0.534531	0.252746	0.55235	0.930586
Zfp322a	13:23313524-23385799	2.45188	1.69278	-0.5345	0.836102	0.3492	0.849014
Nr2c2	6:92091389-92184033	6.04417	4.17305	-0.534441	0.509336	0.1886	0.734508
2610002M06Rik	X:107782750-107872909	2.08779	1.44157	-0.534337	1.24311	0.12425	0.653443
Usp19	9:108490601-108502337	108.225	74.7373	-0.534135	0.650213	0.2594	0.792748
Dopey1	9:86467153-86571842	5.74911	3.97035	-0.534073	0.521575	0.33885	0.843168
Bex1	X:136213971-136226100	34.2655	23.6658	-0.533949	0.608725	0.28325	0.808324
Elavl1	8:4284781-4325100	3.39688	2.34613	-0.533927	2.9084	0.07815	0.565912
Zfp438	18:5210030-5334439	1.57262	1.08628	-0.533774	0.818798	0.2107	0.756396
Sgcb	5:73632748-73647713	37.3547	25.8031	-0.533745	1.75119	0.05	0.480074
Isy1	6:87818446-87838759	8.50984	5.87859	-0.533662	0.884601	0.1258	0.656012
Stk35	2:129800516-129832287	3.1148	2.15196	-0.533492	1.37847	0.12845	0.659841
Lmbr1	5:29229813-29378390	2.91262	2.01238	-0.533415	1.14025	0.1155	0.640172
Gm7516	1:81797240-81797946	3.88975	2.68797	-0.533157	0.534319	0.4009	0.875402
Amer1	X:95420317-95444872	3.23503	2.23596	-0.532886	1.03879	0.0727	0.551051
Hist1h2bj	13:22043213-22043676	2.99056	2.06702	-0.532864	0.387452	0.47835	0.90697
Ift52	2:163017353-163046141	8.61084	5.95173	-0.532846	0.509133	0.2105	0.756217
Gm9727	5:107437996-107491628	29.569	20.441	-0.532621	0.809413	0.15755	0.700719
Osbpl6	2:76406507-76600647	27.0547	18.7045	-0.532497	0.386221	0.574	0.936221
Zfp879	11:50832030-50841552	2.06645	1.42881	-0.532338	0.545356	0.3711	0.860832
Gm9949	18:62180125-62184405	3.0404	2.10257	-0.532105	0.561246	0.33515	0.841308
Psmb6-ps2	1:101385885-101386590	30.9707	21.4187	-0.532033	0.914842	0.1189	0.645435
Ywhae	11:75732868-75765845	182.873	126.472	-0.53202	0.889544	0.20345	0.749427
Ank1	8:22974843-23150497	414.575	286.722	-0.531983	0.401469	0.53985	0.92683
Gm2531	18:10064400-10181792	7.69086	5.31997	-0.531726	0.27344	0.6445	0.953433
Prdx6-ps2	4:25307829-25308523	2.45642	1.70009	-0.530951	0	1	1
Smarca5	8:80698506-80739497	3.48051	2.40966	-0.530466	0.436562	0.3551	0.852256
Gm13669	2:75808357-75808814	8.31807	5.75957	-0.530288	0.504825	0.3297	0.838065
Lrrn4cl	19:8850784-8853909	4.07287	2.82136	-0.529655	1.11717	0.13095	0.663827
Csnk2a1	1:156524011-156526664	22.0064	15.2478	-0.529319	2.24634	0.0586	0.509072
Nrip1	16:76287399-76373827	5.71998	3.96472	-0.52879	0.984113	0.10685	0.625101
Gm13082	4:143671123-143671684	19.8698	13.7789	-0.528114	0.732993	0.1995	0.745696
Mtrf1	14:79397771-79423650	9.59104	6.65129	-0.528053	1.02597	0.10715	0.625726
Hrasls	16:29209694-29230531	26.4643	18.365	-0.52709	0.672939	0.1103	0.631127
Lgr4	2:109917646-110014257	6.365	4.41702	-0.527087	1.36767	0.0606	0.516042
Amigo3	9:108049241-108085003	1.59728	1.10867	-0.526795	0.236001	0.8331	0.983257
2610008E11Rik	10:79064373-79097600	4.99469	3.46693	-0.526736	1.03798	0.08235	0.575732
Pop1	15:34495303-34530648	2.38474	1.65531	-0.526728	0.313829	0.5803	0.937966
Gm9034	10:43821230-43822235	6.28472	4.36279	-0.526598	0.654245	0.25025	0.78736
Pafah2	4:134396319-134427413	1.58545	1.10112	-0.525927	0.453581	0.25835	0.792186
Lmod3	6:97238527-97252780	106.698	74.1035	-0.52592	1.41012	0.0505	0.481821
1700066M21Rik	1:57377619-57385423	4.01675	2.79014	-0.525693	0.319335	0.60175	0.943212
Nmnat3	9:98287434-98420438	7.79942	5.41796	-0.525617	0.758759	0.20775	0.753895
Gm15067	X:144268048-144268204	64.2358	44.6271	-0.525456	0.373738	0.53625	0.925716
Tbc1d16	11:119143044-119228499	10.6329	7.38767	-0.525349	0.989086	0.0824	0.575768
Huwe1	X:151800806-151935417	73.4646	51.0489	-0.525171	0.199797	0.434	0.890952
Gm19503	1:151520446-151520687	116.283	80.805	-0.525117	0.704013	0.22115	0.765244
2810002D19Rik	2:94300766-94438136	1.71759	1.19358	-0.525087	0.215901	0.82305	0.982028
Cpq	15:33083128-33594552	9.07891	6.30926	-0.525049	0.991842	0.10625	0.623803
Gm12508	4:55131207-55279479	3.51957	2.44609	-0.524924	0.333321	0.6393	0.952162
Klhl17	4:156229043-156234857	4.33582	3.01389	-0.524679	0.520339	0.2173	0.762118
Mthfsd	8:119910359-124345724	12.4504	8.65451	-0.524668	0.0066895	0.51275	0.918468
Alg14	3:121291816-121362011	11.4625	7.96885	-0.524475	0.755537	0.19505	0.741346
Dph2	4:117888642-117892032	3.39144	2.3578	-0.524455	0.559483	0.33765	0.842624
Ttc17	2:94300766-94438136	8.8431	6.14839	-0.524344	0.330435	0.35165	0.850151
Gm12626	11:60573526-60633113	2.31557	1.60997	-0.524331	0.473058	0.4223	0.885448
3632451O06Rik	14:49681559-49783383	1.60598	1.11668	-0.524238	0.617606	0.28835	0.81182
Orc4	2:48814108-49322284	6.79453	4.72452	-0.524206	0.171155	0.5654	0.934185
Plxnd1	6:115954810-115995005	4.18911	2.91325	-0.524017	0.807019	0.0885	0.588901
Gnpda2	5:69556923-69592337	2.38035	1.65545	-0.52395	0.355517	0.44755	0.896228
Abcc9	6:142587861-142702274	23.9364	16.6562	-0.523151	1.16789	0.06355	0.52519
Jak2	19:29251827-29313080	7.98191	5.55434	-0.523119	1.10625	0.05855	0.508887
Ndufaf5	2:140170648-140203689	14.3438	9.98277	-0.522915	1.01853	0.11655	0.641546
Tef	15:81800790-81826861	149.41	104.011	-0.522532	0.554231	0.1771	0.722488
Tmem117	15:94629184-95096097	4.66376	3.24702	-0.522378	0.94915	0.14645	0.686281
Elp4	2:105701026-105904564	3.02084	2.10319	-0.52237	0	1	1
Enpp4	17:44096307-44105809	20.4867	14.2646	-0.52225	1.87089	0.0543	0.495098
Acta1	8:119910359-124345724	51082.1	35572.6	-0.52205	0.620452	0.3446	0.846232
Gm6612	15:80948489-80970947	10.8804	7.58241	-0.521008	0.146609	0.82105	0.981838
Glt8d1	14:30999825-31019089	4.45736	3.1065	-0.520898	0.564799	0.54865	0.929454
Gm11599	1:62660838-62661716	12.3572	8.61266	-0.520825	0.739882	0.21215	0.757639
Stxbp4	11:90476491-90638084	3.94634	2.75053	-0.520805	0.809014	0.1303	0.66284
Lpin2	17:70853766-71475343	1.95521	1.36284	-0.520711	0.0280358	0.65675	0.956212
Icmt	4:152297226-152318993	11.0487	7.7014	-0.520679	0.649547	0.1921	0.738379
Cd24a	10:43579168-43584262	138.991	96.8924	-0.520539	1.82582	0.0729	0.55158
Tmem68	4:3549040-3574853	2.65224	1.84902	-0.52045	0.389231	0.52695	0.923096
Rpl7	1:16101294-16104662	289.401	201.761	-0.520425	1.0743	0.3541	0.851583
Gm11488	4:73497614-73498477	26.1166	18.209	-0.520319	0.923416	0.11565	0.640537
Prpf19	19:10895230-10909559	133.271	92.9206	-0.520295	0.552667	0.18425	0.730227
Eid2b	7:28277705-28280129	2.96773	2.06924	-0.520264	1.63012	0.17245	0.717305
Mmgt1	X:56585511-56598069	12.5348	8.73981	-0.520263	1.35463	0.09375	0.599043
Gm6564	5:22931389-22932034	2.00574	1.39868	-0.520067	0.415337	0.4847	0.909575
Gng7	10:80948623-81014945	1.80533	1.25895	-0.520044	0.628417	0.2102	0.75597
Ptrhd1	12:4133102-4240123	18.0777	12.6072	-0.519967	0.979716	0.1039	0.619096
Fam131a	16:20693281-20722267	35.2315	24.5765	-0.519586	0.912583	0.0806	0.571516
Gm12987	4:136469760-136602723	1.87066	1.30501	-0.519487	0.124132	0.80585	0.980132
Tob1	11:94211453-94215495	118.036	82.345	-0.519478	1.23799	0.08115	0.57305
Snapc1	12:73964529-73984820	2.1332	1.4885	-0.519163	0.67599	0.2579	0.791999
Sarnp	10:128821770-128877638	4.48507	3.13044	-0.518766	0.620072	0.2858	0.810056
Cep104	4:153975193-154008732	9.19936	6.42179	-0.518557	0.988051	0.07315	0.552026
Slc35a1	4:34663256-34687438	8.7869	6.13469	-0.518365	0.66956	0.17665	0.72213
Gm6361	15:31441209-31453689	16.2833	11.3686	-0.51833	0.481628	0.40945	0.879605
Gm10784	13:49945095-49945335	31.0064	21.6505	-0.518167	0.492178	0.3869	0.868639
Slc26a6	9:108853282-108913049	8.57472	5.98798	-0.518021	0.379745	0.5331	0.92481
Rpl30-ps11	X:12456885-12457230	10.8083	7.5497	-0.517654	0.462486	0.45335	0.898319
Mtmr6	14:60265204-60302370	16.107	11.2511	-0.517628	1.12376	0.05575	0.49964
Abhd2	7:79273200-79365508	1.61632	1.12917	-0.517449	0.824114	0.1452	0.684581
Nphp1	2:127740731-127788897	16.5985	11.5988	-0.517079	0.989557	0.216	0.761018
Gm5303	6:28215554-28398005	1.65889	1.15951	-0.516708	0.368889	0.575	0.936676
Gm15808	16:13981701-14101500	4.30902	3.01188	-0.516696	0.406632	0.46465	0.902455
Gm14410	2:177183452-177206421	2.13898	1.4951	-0.516681	0.514671	0.5027	0.915148
Eif3j1	2:122028545-122118386	22.7311	15.8905	-0.516505	1.02865	0.07575	0.55969
Rhpn2	7:35334169-35396817	9.28832	6.49473	-0.516148	0.722258	0.24455	0.783414
Gpc1	1:92820957-92860779	73.0946	51.1126	-0.516085	0.727528	0.0928	0.597243
Crnkl1	2:145917478-146215039	5.99695	4.19487	-0.515602	0.543178	0.21535	0.760316
Kpna1	16:35926510-36037131	37.7471	26.4046	-0.515576	0.815158	0.19545	0.741588
Dusp13	14:21733393-21798725	241.739	169.102	-0.515559	0.863199	0.1696	0.714316
Trappc11	8:47490114-47533470	6.4776	4.53179	-0.515377	1.01285	0.07425	0.555145
Med8	4:118409336-118415782	33.067	23.1382	-0.515111	0.908621	0.136	0.671133
Gm13531	2:57425166-57425709	1.84685	1.29245	-0.514963	0.394912	0.51455	0.918927
Gm4518	17:61780914-61781632	304.188	212.887	-0.514875	1.02345	0.067	0.534833
Hdac11	6:91156664-91174692	5.39936	3.77916	-0.514723	0.803319	0.1318	0.665051
Eif4g2	7:111070567-111083030	311.279	217.99	-0.513949	0.443192	0.37205	0.861379
Rpf2	10:40223245-40247036	12.0172	8.41618	-0.513859	0.787041	0.43255	0.890299
Tnni2	7:142441807-142444410	12047.9	8441.02	-0.513297	0.511915	0.31275	0.827729
Parp4	14:56575618-56659794	5.07204	3.55384	-0.513189	1.78796	0.1305	0.663133
Gm10015	8:61224170-61396072	1.88078	1.31781	-0.513187	0.209077	0.7459	0.97194
Gm16305	1:138963708-139176043	2.91827	2.0457	-0.512523	0.176647	0.8335	0.983259
Zdhhc21	4:82798737-82859958	2.35613	1.65188	-0.512309	0.793451	0.1124	0.634445
Kansl2-ps	7:72672817-72674278	52.8045	37.0232	-0.512232	1.08419	0.0669	0.534527
Gm10180	9:25101403-25101481	584.561	409.901	-0.512078	0.334414	0.54995	0.92991
Mat2a	6:72432798-72439558	43.874	30.7743	-0.511641	1.06575	0.0665	0.533286
Lrrcc1	3:14533787-14572658	4.22562	2.96414	-0.511546	0.280529	0.48385	0.909128
Hus1	11:8993136-9011191	2.99238	2.10002	-0.510888	1.17864	0.2205	0.764834
Barx2	9:31846043-31913462	3.27574	2.29906	-0.510773	0.722978	0.22645	0.770049
Gm11349	13:25582270-25583386	3.59725	2.52576	-0.510176	0.595095	0.3317	0.839444
Lum	10:97565500-97572703	12.7433	8.95195	-0.509463	3.47269	0.08775	0.587804
Fam136a	6:86365682-86370057	12.5582	8.82302	-0.509288	0.914807	0.10725	0.625977
Gm3355	17:13482552-13906150	18.7182	13.1509	-0.509277	0.322466	0.5737	0.936162
Cpne1,Gm28036,Nfs1,Rbm12	2:156071841-156145797	58.4028	41.0441	-0.508865	0.577012	0.20675	0.752759
Vezt	10:93939164-94035817	18.5424	13.0334	-0.508619	0.54617	0.4341	0.891
Ewsr1	11:5069688-5106093	84.1975	59.182	-0.508618	0.700718	0.29475	0.815715
Gm15027	X:13179442-13179580	40.6665	28.5868	-0.508493	0.273858	0.64415	0.953396
Steap3	1:120190756-120272705	18.3031	12.8677	-0.508336	1.03843	0.07375	0.553784
Gm15790	1:129273301-130219278	4.58579	3.22416	-0.508245	0.240095	0.6478	0.95416
Tmem198b	10:128790952-128804370	1.63981	1.15296	-0.508193	0.99097	0.35315	0.850886
Mrs2	13:24992482-25020379	6.08804	4.28121	-0.507958	0.872596	0.13625	0.671407
Dgkq	5:108629769-108684557	3.54926	2.49638	-0.507679	0.336616	0.4735	0.905546
Gclc	9:77754534-77794485	8.85119	6.22592	-0.507583	0.979286	0.09275	0.597117
Tdrd3	14:87416638-87545373	4.11981	2.89814	-0.507448	0.833045	0.3243	0.83474
Zfp251	15:76852147-76871435	3.91493	2.75438	-0.507255	1.09047	0.12235	0.651113
Agxt2,Gm21973,Prlr	15:10177237-10410153	1.99119	1.40095	-0.507231	0.404298	0.29465	0.81565
Gm4950	18:51865263-51865881	79.5671	55.9909	-0.506981	1.03884	0.08415	0.580068
Gm8343	9:37685940-37686934	2.0683	1.45577	-0.506659	0.453678	0.4399	0.893302
Grip2	6:91761508-91827250	1.65357	1.16404	-0.506442	0.702101	0.1727	0.717688
2610307P16Rik	13:28460033-28885620	1.4309	1.00734	-0.506375	0.207387	0.66695	0.958627
Med28	5:45520220-45529276	46.0643	32.4415	-0.505807	1.01765	0.1079	0.627158
Ten1	11:116171887-116215318	25.7733	18.1536	-0.505621	0.182962	0.75995	0.973936
Gm16415	18:42441018-42441507	4.9356	3.47664	-0.505534	0.449979	0.4266	0.887503
Gm11185	4:83193987-83194994	56.3161	39.6731	-0.505386	1.01563	0.08135	0.573506
Gm9531	9:81677597-81678677	69.164	48.7328	-0.505128	0.97619	0.10225	0.616001
Plekha3	2:76675280-76696828	1.99396	1.40543	-0.504626	0.867806	0.2556	0.791027
Sfmbt1	14:30714848-30822713	1.52654	1.07621	-0.504295	1.33164	0.1498	0.691031
Rxrg	1:167598383-167639623	42.0601	29.6532	-0.504266	1.06677	0.073	0.551698
Rell1	5:63908895-63968905	2.8108	1.98175	-0.50421	0.671757	0.29265	0.81436
Pdlim3	8:45885484-45919546	507.927	358.123	-0.504166	1.06197	0.1048	0.620806
Gls	1:52163447-52233232	21.8531	15.4087	-0.504093	0.424079	0.38335	0.867105
Hist1h2bf	13:23573735-23574196	2.42301	1.70908	-0.503586	0.359551	0.5555	0.931451
Serpinb9	13:33003249-33017957	1.74292	1.2296	-0.503322	0.658689	0.2434	0.782667
Pbdc1	X:105079755-105117090	3.43693	2.42498	-0.503148	0.625222	0.4235	0.886079
Parp8	13:116854823-117025516	4.01731	2.83527	-0.502745	0.962846	0.14725	0.687505
Msrb3	10:120781095-120899101	48.3723	34.1487	-0.502352	1.48526	0.1031	0.61745
Cxxc5	18:35829817-35861687	15.8355	11.1845	-0.501655	1.07103	0.07935	0.568865
Wwp1	4:19575161-19708993	37.7051	26.6314	-0.50163	1.08189	0.09015	0.592381
Gm20281	1:102449352-102537656	4.11497	2.90666	-0.501519	0.344825	0.3912	0.870558
Capn3,Ganc	2:120355311-120504913	66.0795	46.6808	-0.501372	0.652593	0.092	0.595643
Pgrmc1	X:36598205-36606079	26.0675	18.4165	-0.501253	0.978206	0.1076	0.626763
Ercc6l2	13:63815239-63900302	17.3139	12.2358	-0.500822	1.00291	0.10585	0.623045
Gnpnat1	14:45376333-45388802	1.82606	1.29054	-0.500758	1.13609	0.28315	0.808274
Scn4a	11:106349454-106353288	91.9421	64.9839	-0.500643	0.975635	0.0983	0.60824
Lrp4	2:91457510-91513779	1.49092	1.05402	-0.5003	0.413124	0.32365	0.834283
Nek4	14:30951485-30987439	1.81443	1.2828	-0.500228	0.624862	0.29425	0.815451
Alg11	8:22060720-22071627	7.69357	5.43984	-0.50009	0.32166	0.66035	0.9573
Ryk	9:102834916-102908305	15.5552	10.9986	-0.500075	0.94541	0.07675	0.562485
Ahsa1	12:87266745-87273997	44.0459	31.1454	-0.499988	1.08677	0.0674	0.536017
Evi5	5:107744794-107875107	2.74073	1.93808	-0.499933	0.484713	0.27605	0.804093
Clns1a	7:97579895-97718879	32.0342	22.6533	-0.499892	0.769732	0.1933	0.739688
Eif2b3	4:117019401-117087306	10.4048	7.35789	-0.499885	0.635625	0.2756	0.803838
Fads6	11:115279621-115297663	3.43301	2.42955	-0.498787	0.858625	0.1398	0.676626
Pomk	8:25980603-25994121	5.55313	3.93095	-0.498424	0.951597	0.11405	0.637635
Farsb	1:78310344-78488897	33.1473	23.4652	-0.498372	0.746983	0.20905	0.754689
Arl5a	2:52397950-52424901	6.94897	4.92046	-0.498006	1.44276	0.07515	0.557856
Impa1,RP23-436F15.5,Slc10a5	3:10311955-10335681	7.44237	5.27067	-0.497775	0.410507	0.3065	0.823854
Gm13743	2:87562996-87563720	6.84436	4.84731	-0.49773	0.6444	0.3023	0.820661
Gm4795	10:45006109-45007117	20.4411	14.4778	-0.497632	0.8357	0.14155	0.679233
Ntn3,Tbc1d24	17:24175430-24221730	1.84937	1.30994	-0.497537	1.09786	0.22215	0.766165
Zfp521	18:13687012-13972733	2.92391	2.07131	-0.497356	0.923572	0.11265	0.634961
Ppat	5:76913248-76967509	9.3192	6.60193	-0.497319	0.478482	0.4933	0.912173
Pus10	11:23646478-23732876	5.42567	3.84393	-0.497221	0.372882	0.4117	0.880536
Rrm1	7:102441694-102469771	7.78155	5.51334	-0.497129	1.47688	0.0858	0.583307
Gm16061	5:135670032-135735326	12.8654	9.11752	-0.496782	0.319825	0.6147	0.946294
Rhobtb2	14:69784989-69805530	6.47196	4.58686	-0.496695	0.987876	0.08535	0.582447
1110018N20Rik	2:167103377-167240604	1.83249	1.29917	-0.496212	0	1	1
Naa16	14:79334203-79390778	3.09913	2.19721	-0.496191	0.308637	0.62085	0.94795
Gm8034	19:6044690-6044822	21.6243	15.3365	-0.495691	0.326333	0.70545	0.965679
Hmbox1	14:64811599-64949871	8.13237	5.7681	-0.495581	0.521383	0.33365	0.840629
Gm13306	4:42153435-42158839	1.61686	1.14682	-0.495559	0.306962	0.52375	0.921888
Cog6	3:52981874-53017237	32.4904	23.0455	-0.495527	1.08916	0.06655	0.533469
Gm3348	14:5365793-5389049	4.7809	3.39139	-0.495406	0.546102	0.33565	0.841583
Haus3,Poln	5:34007197-34169448	2.1086	1.49578	-0.495392	0.733779	0.29525	0.816147
Gm12090	11:29545845-29578367	2.87948	2.04281	-0.495255	0.313217	0.6893	0.962754
Ankrd13c	3:157947413-158006833	3.23034	2.29182	-0.495193	1.08768	0.1848	0.730898
Pgm2l1	7:100227393-100278868	7.26824	5.15898	-0.494519	0.997601	0.10305	0.617407
Gm5187	12:107205075-107206066	11.1109	7.88758	-0.494321	0.708019	0.2243	0.768177
Gm5265	1:169453527-169453869	8.66271	6.14978	-0.494284	0.467787	0.49025	0.91139
AI118078	9:55326912-55438345	5.57339	3.95663	-0.494282	0.890205	0.15395	0.696426
Gm4895	10:22153279-22154416	21.7995	15.477	-0.494165	0.902443	0.11725	0.642599
Tenm3	8:48227681-48869901	6.4646	4.59121	-0.493685	0.475566	0.2432	0.782465
Gapvd1	2:34676183-34755232	15.9774	11.3494	-0.493416	0.619817	0.1938	0.740226
Dcaf6	1:165328697-165460475	67.1548	47.7049	-0.493352	0.653023	0.37725	0.863941
4930539J05Rik	3:135436208-135467178	1.59621	1.13394	-0.493311	0.0622614	0.72305	0.968563
Plod2	9:92538800-92608428	2.26032	1.60609	-0.492974	0.413533	0.43065	0.889528
Myo5c	9:75232013-75305451	3.24421	2.30581	-0.492593	0.912851	0.10765	0.626856
Sypl	12:32953890-32979050	109.776	78.0376	-0.492324	1.37985	0.0826	0.576215
Gm6623	17:36179113-36179657	2.36566	1.68176	-0.492267	0.352946	0.53955	0.926717
Cuzd1	7:130162450-133124354	2.41089	1.71406	-0.492152	0.0250031	0.72575	0.968902
Tpd52l1	10:31332379-31445921	29.7931	21.1843	-0.491982	1.05233	0.0866	0.585043
Crhr2	6:55090048-55133016	11.1197	7.91443	-0.490567	0.668249	0.1182	0.644251
Lepre1	4:119232914-119248975	5.71	4.06511	-0.490198	0.404928	0.60695	0.944297
Sel1l3	5:53107083-53213452	10.0583	7.16221	-0.489907	1.09085	0.07075	0.545885
Mc5r	18:68337602-68339711	4.52049	3.21925	-0.489755	0.546265	0.32445	0.834838
Adprm	11:67037904-67052594	9.59769	6.83767	-0.489184	0.588417	0.27305	0.802157
Gm26782	14:50824061-50879003	3.22759	2.29997	-0.488841	0.430113	0.55945	0.932636
Cdk20	13:64432552-64439720	1.61715	1.15261	-0.488542	0.590292	0.36115	0.855352
Skp1a	11:51949881-52286179	115.567	82.3766	-0.488422	0.503991	0.58005	0.937908
Lrrk2	15:91673174-91816120	3.21617	2.29307	-0.488059	0.303646	0.64505	0.953522
Kif3b	2:153291412-153333390	1.40878	1.00454	-0.487913	0.821568	0.1814	0.726995
Gm14231	2:156789811-156790403	14.0171	9.99507	-0.4879	0.624887	0.26915	0.799555
Pvalb	15:78191113-78206400	6018.82	4292.59	-0.487632	0.64939	0.29	0.812749
Ppm1f	16:16896468-16927364	3.22444	2.30019	-0.487294	1.37747	0.12315	0.651954
Gm8141	1:109833023-109834746	4.30398	3.07034	-0.487272	0.725433	0.21855	0.763041
Tceb2	17:23790531-23829109	529.42	377.742	-0.487012	0.331312	0.54575	0.928686
Met	6:17463799-17573980	3.07879	2.19674	-0.487004	0.50396	0.3059	0.823328
Ift27	15:78159464-78174108	8.67729	6.19199	-0.486842	0.651324	0.2633	0.79546
Gm12017	11:17973787-17974790	21.7436	15.5167	-0.48677	0.871329	0.12705	0.657845
Txndc16	14:45134447-45281230	5.43727	3.88035	-0.486696	0.604177	0.1596	0.70275
Azin1	15:38487429-38519266	8.02293	5.72592	-0.486622	1.09865	0.10105	0.613842
Gm16335	13:100759673-100775899	13.0482	9.31552	-0.486139	0.394852	0.4941	0.912462
Rhobtb1	10:69151433-69291791	13.5434	9.67161	-0.485757	0.547627	0.2246	0.768343
Extl2	3:116007461-116029016	7.22735	5.16263	-0.485362	0.680767	0.31635	0.829995
Ccdc9	7:16274041-16286795	23.3932	16.7111	-0.485277	0.544959	0.3813	0.866116
Pkm	9:59656367-59679375	2058.25	1470.38	-0.485232	0.624134	0.2431	0.782387
Nme6	9:109833192-109842961	21.0168	15.0142	-0.485217	0.888702	0.117	0.642287
4932438A13Rik	3:36863105-37060035	8.84143	6.31943	-0.484485	0.628087	0.1334	0.667288
Luc7l2	6:38551333-38609470	51.0179	36.4729	-0.484179	0.871618	0.24255	0.781913
Limk2	11:3344255-3409189	14.9669	10.7007	-0.484069	0.474038	0.32665	0.836094
Rpl4	9:64173386-64178562	501.722	358.712	-0.484061	0.924522	0.1135	0.636566
Tbl2	5:135149656-135163873	2.88624	2.06362	-0.484015	0.599781	0.2915	0.813608
Sac3d1	19:6116003-6118586	17.7851	12.7174	-0.483866	0.880442	0.14475	0.683913
Psma5	3:108248908-108279974	9.11278	6.5166	-0.483773	0.417211	0.47	0.904394
Rpl12-ps1	1:36957929-36958427	6.23482	4.45892	-0.483653	0.454048	0.4491	0.89684
Ctsc	7:88278084-88310888	17.3974	12.444	-0.483415	0.918796	0.1367	0.672007
Gm7150	X:153403089-153404070	4.64202	3.32063	-0.483296	0.542425	0.32955	0.837969
Gm11658	11:109159186-109160194	5.61911	4.01978	-0.483226	0.592383	0.2949	0.815912
Aktip	8:91070056-91134465	23.3795	16.7301	-0.482797	0.276473	0.4679	0.903731
Sh3rf2	18:42053666-42158960	10.1174	7.24007	-0.482764	0.643881	0.30545	0.823085
Mr1	1:155127276-155146814	10.6483	7.62002	-0.482752	1.07793	0.12755	0.658559
Ube3c	5:29569241-29676077	11.2367	8.04646	-0.481789	1.04482	0.0786	0.567099
Gm5479	17:3056686-3057121	6.67298	4.77893	-0.481643	0.438322	0.45895	0.900264
Grhpr	4:44981394-44990734	43.3804	31.076	-0.481244	0.623838	0.22975	0.772691
Itpr1	6:108213117-108551109	2.51473	1.80146	-0.481235	0.924925	0.1015	0.614642
Tpd52l2	2:181497141-181517966	35.8728	25.6982	-0.481225	0.383709	0.2685	0.799206
Ppfia1	7:144476757-144553729	19.3486	13.8674	-0.480534	0.373851	0.4185	0.883634
Gm13503	2:53551925-53552371	7.27874	5.21781	-0.480243	0.424798	0.464	0.902301
Hnrnpdl	5:100033576-100039664	44.7293	32.0648	-0.480232	0.981939	0.36245	0.856179
Sync	4:129287616-129335370	26.4204	18.9413	-0.480115	0.730151	0.2259	0.769612
Amd1	10:40287457-40302188	29.8857	21.4315	-0.479722	1.30812	0.08205	0.575069
Nit2	16:57156670-57167332	8.94045	6.41334	-0.479272	0.712132	0.23935	0.77952
Snrnp200	2:127208385-127240451	23.0165	16.512	-0.479153	0.506218	0.3668	0.858682
Sfxn5	6:85213050-85333422	2.28528	1.6398	-0.478854	0.523562	0.3289	0.837522
Gm10045	17:29308137-29308620	42.3414	30.384	-0.478757	0.772073	0.17895	0.724609
Zfyve19	2:119172499-119217049	16.4961	11.8378	-0.478725	0.511649	0.4216	0.885055
Gm12345	11:77089914-77188968	13.6673	9.8079	-0.478715	0.615798	0.29575	0.816444
Gm6473	1:30769686-30771815	1.49	1.06961	-0.478233	0.674983	0.4309	0.88966
Gm6478	13:62035419-62036163	5.02106	3.60441	-0.478228	0.502675	0.3896	0.869766
Gm15032	X:142622491-142622902	2.42794	1.74293	-0.478219	0.329229	0.58355	0.938766
Gm10254	3:54810563-54811250	26.4726	19.0061	-0.478036	0.790566	0.17405	0.719105
Psmb4	3:94884092-94886961	305.821	219.581	-0.47793	0.646071	0.2475	0.785503
RP23-155G2.1	1:185878083-185878885	2.07639	1.49153	-0.477291	0.408274	0.4888	0.910958
Slc18b1	10:23796985-23827968	1.86905	1.34263	-0.477245	0.296107	0.64545	0.953593
Rab10os	12:3235503-3309969	5.71529	4.10675	-0.476831	0.12487	0.66895	0.959086
Gm10698	9:33728246-33728850	129.315	92.9317	-0.476647	1.00692	0.0881	0.588129
Commd7	2:153616932-153632781	6.90036	4.95907	-0.4766	0.740286	0.2388	0.779022
Mllt3	4:87769924-88033364	55.5047	39.8907	-0.476558	0.525287	0.56645	0.934342
Gm13453	2:40127503-40127860	447.001	321.368	-0.476049	0.96741	0.0922	0.595964
Lipo1,Lipo2,Lipo4	19:33498036-33769142	2.94098	2.11448	-0.475991	0.502501	0.33325	0.840377
Gm25541	2:27539804-27539930	5.32328	3.82766	-0.475852	0	1	1
Cml1	6:85910153-85915687	5.31892	3.82548	-0.475495	0.383288	0.4033	0.876565
Rpl7a	2:26910763-26913318	125.38	90.19	-0.475266	0.942771	0.1522	0.694384
Nid2	14:19751256-19823823	1.90933	1.37366	-0.475038	0.352679	0.55435	0.931077
Snupn	9:56950877-56983206	6.0859	4.37928	-0.474775	0.67026	0.25625	0.791174
Gadd45b	10:80930090-80932204	34.5062	24.8409	-0.474136	1.01752	0.1024	0.616237
Cyb561a3	19:10577453-10588548	4.63573	3.33746	-0.474047	0.923297	0.2513	0.787963
Fbxo8	8:56551089-56592393	14.899	10.7277	-0.473878	1.33475	0.10175	0.615106
Pak1	7:97842934-97912381	11.3172	8.14871	-0.473876	1.09123	0.1008	0.613263
Fhod3	18:24709444-25467321	8.61154	6.20327	-0.473241	0.996433	0.12185	0.650402
Anapc15	7:101881324-101933895	30.538	21.9996	-0.473129	0.284182	0.6724	0.959952
Herc2	7:56050154-56231794	6.3926	4.60566	-0.472996	1.00252	0.08235	0.575732
Srrm2	17:23790531-23829109	152.416	109.906	-0.471746	0.333028	0.46735	0.903554
Lrrfip1	1:90998736-91128944	36.5846	26.3891	-0.471293	0.835776	0.10755	0.626628
Gm13080	4:143611657-143612077	20.3336	14.667	-0.471289	0.551694	0.34845	0.848553
Myo9a	9:59750895-59928866	2.06869	1.4923	-0.471181	0.244284	0.42135	0.884944
Rprd1a	18:24484961-24530204	6.52324	4.70632	-0.47099	1.5219	0.1075	0.626504
Gm14767	X:85701936-85776819	2.57942	1.86098	-0.470986	0.149036	0.72505	0.968811
Hist1h2bc	13:23684198-23692488	103.037	74.3414	-0.470922	1.0577	0.0967	0.605081
Klhl33	14:50891388-50893255	105.764	76.3125	-0.470861	1.06638	0.08915	0.590338
9530082P21Rik	17:23741199-23754065	2.82928	2.04168	-0.470674	0.6282	0.272	0.801391
Nfu1	6:87009235-87028461	33.6342	24.2739	-0.470524	0.834919	0.1627	0.706726
P4ha1	10:59323295-59373304	10.5096	7.58493	-0.470506	0.903968	0.1275	0.658483
Zfp354b	11:50921822-50931633	1.47516	1.06471	-0.470418	0.46514	0.3951	0.872713
BC030336	7:120677619-120734854	2.53692	1.83138	-0.470153	2.9828	0.15545	0.698035
Slu7	11:43433743-43447981	12.0432	8.69691	-0.469647	0.575213	0.23595	0.777105
Gm14026	2:129158665-129180667	25.8105	18.6405	-0.469521	0.965003	0.09965	0.610853
Ctc1	11:69015910-69036473	7.645	5.52136	-0.469491	0.370663	0.52945	0.923819
Ptbp2	3:119718741-119783388	3.74513	2.70493	-0.469424	1.07888	0.17315	0.718181
Brd2	17:34112022-34122634	69.2323	50.0076	-0.469297	0.626672	0.2955	0.816329
Tmcc1	6:116018617-116193486	32.2623	23.3122	-0.468762	0.531728	0.36105	0.855267
Pgam2	11:5801639-5803733	3691.56	2667.98	-0.468482	0.617641	0.2421	0.78165
Wnk1	6:119923968-120038672	132.85	96.025	-0.468312	0.166373	0.47395	0.905735
Dand5	8:84815404-84822823	11.5031	8.31529	-0.468187	0.934291	0.14165	0.67929
Gm14200	2:158409847-158499253	56.3781	40.7546	-0.468172	0.176968	0.82505	0.982288
D3Ertd751e	3:41742610-41803320	2.98309	2.15701	-0.467772	0.465899	0.23515	0.776646
Gm8112	10:81693717-81694185	3.06406	2.21583	-0.4676	0.375624	0.49885	0.913821
Zbtb26,Zbtb6	2:37425499-37443171	1.4317	1.03544	-0.467485	0	1	1
Stau2	1:16228505-16520112	27.7558	20.0761	-0.467307	0.971156	0.10185	0.615302
Eml1	12:108370956-108702306	45.6264	33.0045	-0.467208	0.739585	0.15675	0.699649
Slc12a2	18:57878677-57946821	9.03511	6.53599	-0.467136	5.80758	0.08345	0.578302
Gm28883	1:135869781-135870150	13.9347	10.0823	-0.466854	0.482251	0.4089	0.87927
Acap2	16:31092412-31201238	2.42139	1.75229	-0.466597	1.06103	0.1546	0.697032
Cdk19	10:40348507-40483818	2.34223	1.69504	-0.466563	0.979388	0.16045	0.703849
Uaca	9:60794547-60880370	131.178	94.9384	-0.466464	1.19046	0.1111	0.632452
Gm6723	15:78554407-78554848	8.5364	6.17827	-0.466424	0.444204	0.43975	0.89325
Mypop	7:18989553-19001766	6.88328	4.98236	-0.466267	0.709478	0.24035	0.78041
Fbxo25	8:13907805-13940521	5.88129	4.25763	-0.466084	0.737246	0.21685	0.761673
Gatc	5:115333241-115341178	24.2976	17.5947	-0.465679	0.977098	0.0941	0.599655
Smim20	5:53267105-53283510	76.368	55.3032	-0.465607	0.762098	0.1228	0.651508
Gm5263	1:146419435-146902472	3.73768	2.70672	-0.4656	0.252778	0.67575	0.960371
Eif4enif1	11:3131849-3266415	20.2747	14.686	-0.46524	0.232484	0.46785	0.903723
Phactr4	4:132355922-132422489	2.51258	1.82027	-0.465023	0.937393	0.2029	0.748799
Xrcc5	1:72307420-72394952	8.39101	6.0792	-0.464964	0.85784	0.13325	0.667102
Siah1b	X:164070704-164076493	2.69507	1.95277	-0.464803	0.45439	0.48	0.90749
Gm12669	4:91805546-91806555	187.493	135.861	-0.464705	1.05402	0.09125	0.59437
Oat-rs1	X:75915215-75930227	2.29129	1.6604	-0.464628	0.650793	0.3563	0.852944
Mtus1	8:40990913-41133726	29.268	21.2093	-0.464624	0.552687	0.16115	0.704845
Kbtbd4	2:90894633-90918258	14.7552	10.6967	-0.464061	0.310727	0.4828	0.908677
Gprc5c	11:114851151-114872617	14.7929	10.7243	-0.464022	0.807048	0.2298	0.772727
BC003331	1:150361304-150466165	12.5609	9.10667	-0.46394	0.393149	0.3649	0.857585
Snx13	12:35047188-35147469	10.3175	7.48097	-0.463792	1.35358	0.09005	0.59209
Atpaf2	11:60400625-60450927	13.4484	9.75118	-0.463783	0.25825	0.5992	0.942647
Hsd3b7,Setd1a	7:127776669-127803802	21.7895	15.7993	-0.46378	0.517092	0.17155	0.716561
Acvr1b	15:101174066-101213679	24.9914	18.1267	-0.463311	0.991544	0.0894	0.590703
St8sia5	18:77185005-77255450	18.717	13.5761	-0.463284	0.943921	0.10965	0.629922
Fbxo42	4:141147912-141204062	3.77346	2.73753	-0.463014	0.931272	0.15465	0.697139
Rab2b	14:52261758-52305128	1.53926	1.11686	-0.462794	0.201639	0.63385	0.95082
Asb14	14:26894556-26915258	114.29	82.935	-0.462651	0.874648	0.2035	0.749455
Tfam	10:71225463-71238280	23.8346	17.2957	-0.46265	0.451107	0.4915	0.911717
Nfrkb	9:31386191-31421333	3.07058	2.22857	-0.462391	0.84084	0.279	0.805965
Parp2	14:50807945-50821300	3.58106	2.59916	-0.462343	0.613882	0.30055	0.819408
Rnf6	5:146209191-146221555	21.9389	15.9237	-0.462316	0.968061	0.2378	0.778383
Map3k7	4:31964096-32023467	12.9984	9.43473	-0.462275	0.859074	0.21985	0.764094
Pds5a	5:65615259-65697856	3.40458	2.47123	-0.462248	0.735715	0.1987	0.744865
Otud4	8:79639617-79677724	7.98649	5.79758	-0.462111	1.35817	0.08815	0.588221
Igf2r	17:12682405-12868143	9.49316	6.89217	-0.461931	0.782936	0.1138	0.637107
Agps	2:75832176-75931350	4.27212	3.10189	-0.461806	0.345361	0.3514	0.850065
Nudt12	17:58996250-59024981	6.14721	4.46342	-0.461783	0.61618	0.29255	0.814282
Wdr60	12:116207049-116263025	3.96667	2.88035	-0.461687	0.780074	0.16365	0.707641
Rgmb	17:15806252-15826586	9.85031	7.15319	-0.461581	2.12446	0.1049	0.621102
Nutf2	8:105860633-105880402	14.7491	10.7121	-0.46138	1.66302	0.1149	0.639194
Phkb	8:85840958-86061376	177.701	129.071	-0.461294	0.827145	0.16785	0.712591
Ttll4	1:74661744-74703730	6.83737	4.96665	-0.461167	0.414014	0.32005	0.832134
Zfp944	17:22337988-22361400	3.11137	2.26018	-0.461115	0.642404	0.30895	0.825326
Rpl31-ps16	17:85498632-85499008	56.6329	41.1402	-0.461094	0.71669	0.2211	0.765227
Gm8907	9:50186042-50187045	3.37278	2.4502	-0.46104	0.476786	0.41345	0.881421
Map2k4	11:65688242-65788297	20.9289	15.2063	-0.460822	1.57835	0.0701	0.543786
Metrn	17:25794570-25985680	51.1431	37.1634	-0.460655	0.255261	0.7056	0.965679
Smc6	12:11265885-11319785	3.90245	2.83583	-0.460608	1.60324	0.11605	0.64079
Wbp1	6:83119043-83121559	31.776	23.0913	-0.460587	0.579951	0.3279	0.836914
Tmem17	11:22512087-22519234	2.24625	1.63233	-0.460585	0.519964	0.38435	0.867566
Ccbl1	2:30185123-30205847	8.05249	5.85198	-0.46051	0.725969	0.20505	0.751089
Cntrl	2:35109491-35178822	6.76883	4.91912	-0.460506	0.502121	0.3796	0.865266
Atpaf1	4:115784811-115818828	28.5637	20.7619	-0.460245	0.801439	0.17335	0.718435
Ube2e1	14:18267822-18331859	32.0986	23.335	-0.460012	0.649503	0.3611	0.855304
Cited4	4:120666571-120667820	6.65677	4.84005	-0.4598	0.606918	0.3327	0.839984
Rbm45	2:76369983-76383768	3.06263	2.2271	-0.459603	1.08475	0.2689	0.799405
Chad	11:94557101-94601871	3.43822	2.50055	-0.459418	0.376305	0.5913	0.940708
Dcaf8	1:172148083-172206804	93.5948	68.0761	-0.459281	1.0696	0.15465	0.697139
Rab2a	4:8535643-8607778	113.115	82.2922	-0.458966	0.986566	0.0962	0.604092
Gtdc1	2:44564411-44927657	14.866	10.8165	-0.458784	0.709801	0.22445	0.768232
Gm8545	X:74006701-74007502	1.41839	1.0322	-0.458534	0.329482	0.5636	0.933745
Arsk	13:76060421-76098660	1.65239	1.20252	-0.45849	0.649086	0.33135	0.83918
Tubd1	11:86544990-86567360	5.51434	4.01379	-0.458224	0.583653	0.3275	0.836558
Gm8482	12:100779056-100908198	8.11257	5.90555	-0.458089	0.229284	0.7106	0.966383
Gpr21,Rabgap1	2:37443278-37703859	7.85574	5.71963	-0.457826	0.530839	0.25985	0.792979
Zak	2:72285636-72442610	37.1785	27.0735	-0.457588	0.81428	0.0985	0.608659
Socs2	10:95385361-95417180	10.4088	7.58001	-0.457534	0.629194	0.20445	0.750514
Phf13	4:151989632-151996258	2.11646	1.54142	-0.457394	0.826839	0.2544	0.79025
Idh1	1:65158615-65186500	14.0566	10.2382	-0.457293	0.347694	0.5905	0.940467
Pmpca	2:26389338-26409203	50.1823	36.5548	-0.45712	0.490896	0.2616	0.7942
Uqcr11	10:80402996-80406830	749.885	546.333	-0.45689	0.965193	0.09745	0.606698
Pdlim7	13:55495794-55513676	295.487	215.283	-0.456861	0.753088	0.28225	0.807784
Gm12176	11:46896252-47988969	4.17914	3.0453	-0.456623	0.293878	0.63415	0.950937
Hif1an	19:44562849-44576274	55.2964	40.2952	-0.456579	0.937767	0.11055	0.63151
Zfp407	18:84128026-84589725	1.47476	1.07483	-0.456375	0.525832	0.2243	0.768177
Gm6913	14:59647530-60197179	19.3751	14.1236	-0.456097	0.355537	0.54655	0.928843
Ak1	2:32621757-32635058	525.275	382.91	-0.456066	0.904991	0.16225	0.706176
Upp2	2:58567297-58792971	5.47684	3.99265	-0.455998	0.326423	0.5477	0.92914
Dpy19l4	4:11261314-11386783	4.86723	3.54832	-0.455963	0.775406	0.1437	0.682458
Gm12341	11:76416733-76622314	4.86203	3.54462	-0.45593	0.132893	0.82655	0.982508
C4b	17:34728379-34743882	14.1655	10.3282	-0.455794	0.34149	0.58475	0.939095
Rnf111	9:70425428-70503725	1.91477	1.39612	-0.455751	1.69712	0.18895	0.734843
Pdcd2l	7:34184498-34196661	42.9417	31.3234	-0.455139	0.552152	0.34855	0.84863
Mlec	5:115142980-115158179	37.7727	27.5619	-0.454669	0.689135	0.14645	0.686281
RP23-433P9.3	1:184695033-184695461	5.78443	4.22124	-0.454509	0.373641	0.50115	0.914676
Ephx1	1:180976157-181020904	57.8992	42.2551	-0.45442	0.207412	0.6007	0.942995
Uros	7:133686242-133881532	14.1742	10.3472	-0.454027	0.270865	0.5842	0.939005
Dnase1l1	X:74273216-74290151	133.653	97.5702	-0.453984	0.669158	0.25495	0.790686
Stx17	4:48124914-48186507	7.96341	5.81404	-0.453844	1.13641	0.09055	0.59318
Mrpl40	16:18836577-18970309	61.0556	44.5765	-0.453841	0.636609	0.3048	0.822678
Zfp317	9:19641223-19648048	5.64627	4.1224	-0.453814	0.692189	0.2282	0.771502
Gm5335	7:72989153-72990153	3.91811	2.86188	-0.453192	0.494994	0.39065	0.870259
Bcap29	12:31595353-31634658	20.8777	15.2506	-0.453097	1.02065	0.11535	0.639959
Smarcd3	5:24586740-24602012	114.612	83.7221	-0.453073	0.558803	0.35445	0.851848
Rnf149	1:39547569-39577405	11.1849	8.17114	-0.452948	0.419809	0.4406	0.893574
Narf	11:121237252-121255856	39.6503	28.9714	-0.452705	0.58059	0.12885	0.660494
Asna1	8:85017933-85025278	57.7781	42.223	-0.452494	1.08504	0.11465	0.638748
Cables2	2:180258539-180273496	4.09272	2.99103	-0.452417	0.714009	0.18655	0.73268
Fmo5	3:97628803-97655282	5.29878	3.87257	-0.452369	0.655497	0.2231	0.766964
Rab24	13:55319222-55321980	12.7521	9.32043	-0.452263	0.841697	0.14165	0.67929
Gm21378	13:120099348-120100332	6.74413	4.92952	-0.452185	0.581215	0.3054	0.823004
Gm10157	9:118606689-119043998	259.229	189.51	-0.451956	0.612657	0.2907	0.813074
Tsc22d4	5:137745729-137768450	53.3934	39.051	-0.451301	0.535501	0.34965	0.849095
Egf	3:129677574-129755322	12.0691	8.82742	-0.451251	0.941126	0.1014	0.614416
Ube2e3	2:78868123-78921293	29.8012	21.7998	-0.451057	0.554209	0.3512	0.850001
Rpl5-ps2	2:154703808-154704699	81.4671	59.6008	-0.450884	1.02252	0.1084	0.628036
Hspa9-ps1	X:60223289-60807993	25.583	18.7171	-0.45083	0.945498	0.1376	0.673314
Plxna2	1:194618217-194816869	1.72851	1.26463	-0.45082	0.638541	0.27955	0.806366
Alkbh5	11:60536380-60558512	35.0786	25.671	-0.450449	1.49142	0.1124	0.634445
Gpr133	5:129096749-129204599	1.67072	1.22272	-0.450377	0.166295	0.77485	0.975825
Papd5	8:88199212-88259722	6.55857	4.80189	-0.449779	0.463763	0.41425	0.88184
Gm9387	3:128953781-128955098	2.51309	1.84001	-0.449751	0.499491	0.4264	0.887379
Eif3j2	18:43475417-43477796	42.9088	31.4167	-0.44974	1.02537	0.0937	0.598888
Esd	14:74732296-74750765	22.4472	16.4389	-0.449424	0.802284	0.15105	0.69281
Rnaseh1	12:28649601-28659591	6.21844	4.55423	-0.449346	0.650581	0.2878	0.81151
Rab33b	3:51482330-51496232	13.7932	10.1022	-0.449288	0.313641	0.65495	0.955891
Ufl1	4:24960789-25281821	6.07355	4.44929	-0.448965	0.929993	0.1774	0.722889
Gm4246	17:36194595-36194811	21.8778	16.0272	-0.448946	0.308559	0.5977	0.942286
Kri1	9:21265298-21287969	11.8414	8.67547	-0.448821	0.302396	0.589	0.940171
Rps6ka3	X:159210306-159368244	9.85902	7.22368	-0.44871	0.570603	0.1824	0.727993
Gm13007	4:135997522-135997887	5.84064	4.28124	-0.448099	0.361157	0.52075	0.920905
Smim13	13:41249859-41276574	14.5073	10.6345	-0.448023	2.06205	0.09965	0.610853
Zfp799	17:32810143-32822200	1.39677	1.0239	-0.448012	1.51078	0.2498	0.78712
Lgals9	11:78962973-78984946	8.78171	6.43813	-0.447861	0.702077	0.2224	0.766334
Jarid2	13:44729473-44921643	3.1911	2.33976	-0.447691	0.581674	0.21505	0.760049
Scn1b	7:31116523-31126945	492.039	360.79	-0.447612	0.908274	0.1578	0.700953
Cdon	9:35421127-35507652	3.11961	2.28765	-0.447496	0.295169	0.33215	0.839694
Ddx51	5:110653450-110660496	7.35019	5.39144	-0.447112	0.366009	0.59425	0.941508
Cp	3:19957053-20035315	10.5	7.70288	-0.446914	0.376073	0.45295	0.898184
Fbxo45	16:32230111-32247158	7.13613	5.2358	-0.446732	2.04217	0.1185	0.644709
Btd	14:31523081-31668579	7.8059	5.72832	-0.446452	0.498897	0.40945	0.879605
Gm12096	11:30505990-30649587	3.4988	2.56765	-0.446413	0.173708	0.8177	0.981413
Dnaja1	4:40720153-40757923	9.15821	6.72204	-0.446166	0.345556	0.42	0.884412
Dync1li2	8:104417673-104443047	9.14689	6.714	-0.44611	1.82025	0.10865	0.628518
Traf3	12:111159849-111267153	3.72971	2.73779	-0.446052	0.610663	0.1495	0.690639
Setd6	8:95715914-95719010	42.1842	30.9792	-0.445403	0.336539	0.5901	0.94044
Tmem33	5:67260564-67291461	8.34629	6.12967	-0.445326	0.381726	0.53495	0.925396
Mkrn2	6:115601937-115676635	24.5567	18.036	-0.445238	0.55768	0.3625	0.856183
Gm1862	X:53883610-53884420	27.5337	20.2254	-0.445027	0.79415	0.178	0.723569
Suclg1	6:73248381-73276911	422.016	310.006	-0.445002	0.572327	0.321	0.832664
Osbpl9	4:109000654-109202272	74.2138	54.5174	-0.44497	0.318707	0.55425	0.93106
Gm14730	X:71197126-71198171	2.12643	1.56239	-0.444674	0.404279	0.4951	0.912669
Ccbl2	3:142701050-142744910	23.5143	17.2774	-0.444649	0.379683	0.5658	0.934299
Med9os	11:59946888-59948142	1.67949	1.2342	-0.444451	0.279817	0.56685	0.934448
Gas2	7:51860576-51994975	1.81181	1.3315	-0.444381	0.322981	0.4386	0.892988
Shisa4	1:135371056-135375237	117.083	86.0613	-0.444092	1.03736	0.14555	0.685061
Zfp933	4:147822985-147848366	1.5266	1.12222	-0.443966	0.499207	0.38535	0.868125
9630033F20Rik	6:127085115-127110467	65.9367	48.4775	-0.443766	1.12501	0.1229	0.651732
Cyb5d1	11:69391924-69398234	18.0628	13.2801	-0.44376	0.357999	0.52175	0.921135
Akr1b3	6:34290264-34324249	76.0218	55.9169	-0.443129	1.03688	0.1675	0.711972
Gm12942,Zmym6	4:127077382-127129644	3.76269	2.76765	-0.443101	0.557875	0.3413	0.84445
Gm5523	1:13785882-13786879	71.4116	52.5306	-0.443	0.911407	0.1135	0.636566
Nfyb	10:82748700-82764144	11.71	8.61445	-0.442905	0.704236	0.27665	0.804445
Tmem2	19:21778341-21858327	1.3845	1.01855	-0.442842	0.739346	0.2417	0.781444
Ebpl	14:61339762-61360445	2.5346	1.86585	-0.441921	0.694465	0.30155	0.820017
Ppp1r3a	6:14713821-14755274	53.4459	39.3446	-0.441914	1.2212	0.1302	0.662693
Kansl2	15:98518820-98534244	21.592	15.8973	-0.441718	0.912728	0.1137	0.636921
Dagla	19:10245264-10304877	3.86169	2.84324	-0.441699	0.689008	0.1834	0.729246
Ube4b	4:149328415-149426749	29.7096	21.875	-0.441647	0.42769	0.47285	0.905227
Gab1	8:80764433-80880479	5.42422	3.99389	-0.441623	1.26909	0.12665	0.657327
A930018M24Rik	14:50895941-50897456	50.1519	36.9409	-0.441084	0.983365	0.1048	0.620806
Hdac3	18:37935843-37954988	22.8263	16.8143	-0.441006	1.02461	0.1297	0.661784
Casp7	19:56397128-56442344	1.58219	1.16551	-0.44096	0.502394	0.39425	0.872153
Zfp687	3:94974730-95015448	7.12907	5.2518	-0.440902	0.23099	0.50315	0.91531
Arl3	19:46531108-46573085	98.9304	72.8802	-0.440887	1.01491	0.10835	0.627923
Kbtbd3	9:4309742-4331721	1.5938	1.17427	-0.440709	0.608407	0.35795	0.853665
AA474331	10:39890017-39899238	1.84585	1.36012	-0.440552	0.938723	0.2761	0.80412
Pan3	5:147430160-147548502	3.57847	2.63687	-0.440517	0.361316	0.56235	0.933354
Gm10268	18:38238404-38262629	36.0997	26.6064	-0.440213	0.261499	0.657	0.956292
AI480526	5:123047372-123250131	23.5886	17.3859	-0.440173	0.227874	0.545	0.928384
Zfp9	6:118461949-118479320	2.73054	2.01287	-0.439931	0.696615	0.2184	0.762875
Dnph1	17:46442447-46831413	12.9966	9.58105	-0.439883	0.0980097	0.81565	0.981215
Ehbp1	11:22005827-22342292	2.2771	1.67882	-0.439756	0.604476	0.21905	0.76345
Psma4	9:54950229-54958030	60.9193	44.9271	-0.439312	0.864329	0.1182	0.644251
Naglu	11:101070011-101077672	5.51005	4.06367	-0.439281	0.65413	0.2356	0.776989
Ndufc1	3:51404676-51408988	821.17	605.716	-0.439039	0.845786	0.15315	0.6955
Gm11410	4:80003988-80005131	29.2639	21.5897	-0.43878	0.811197	0.1842	0.730191
Zfp560	9:20345135-20385177	9.10601	6.71846	-0.438689	0.454626	0.4558	0.899165
Gm27252	7:63886346-63938915	4.23212	3.12255	-0.438654	0.173853	0.8466	0.984472
Opa1	16:29579333-29654884	17.6749	13.0409	-0.438653	0.800697	0.1098	0.63022
Mfsd1	3:67582740-67604237	4.98202	3.67757	-0.437977	2.07691	0.26635	0.797716
Lifr	15:7129558-7197489	3.97256	2.93269	-0.437847	0.918592	0.1323	0.665744
Gm10313	8:46254676-46255678	27.8823	20.5842	-0.437815	0.806523	0.15825	0.701405
RP24-422L17.1	3:8327530-8329707	2.88956	2.13357	-0.437581	0.599346	0.2829	0.808124
Cdc23	18:34624623-34651735	15.7995	11.6661	-0.437555	0.441772	0.46195	0.901503
Cyld	8:88697027-88751945	4.48015	3.30815	-0.437525	1.25066	0.117	0.642287
Snx11	11:96766801-96777559	8.33801	6.15733	-0.437399	0.582429	0.28875	0.812019
Srpk2	5:23434440-23616571	3.54655	2.61905	-0.437376	1.38857	0.3466	0.847497
Sept10	10:59164112-59221847	1.59365	1.17698	-0.437242	0.591231	0.34555	0.846858
Hk2	6:82725024-82774454	53.8357	39.762	-0.437173	0.612032	0.20215	0.748135
Lipt1	1:37871737-37890411	13.1468	9.71019	-0.437136	0.76559	0.22225	0.76624
Gm14227	2:155133508-155226855	5.19418	3.83724	-0.436827	0.23385	0.7188	0.967876
Mtf2	5:108065673-108132620	2.65167	1.9594	-0.436492	0.417923	0.5164	0.919504
Zfp946	17:22424221-22456689	2.66766	1.97129	-0.436436	0.462305	0.4139	0.881694
Plekha2	8:25025450-25102194	2.44214	1.80479	-0.436314	0.557768	0.33845	0.842989
Fam219b	9:57521231-57543187	3.69398	2.73039	-0.43607	0.535602	0.6525	0.955243
Mgst1	6:138140315-138156755	132.377	97.8524	-0.435972	0.757135	0.21365	0.758764
Smarca1	X:47809367-47892974	2.21654	1.63846	-0.435963	0.215713	0.60285	0.943416
Ctage5	12:59129719-59191583	22.7596	16.8241	-0.435944	0.703464	0.23585	0.777092
Zfp260	7:30094776-30107622	19.51	14.4221	-0.435931	0.664836	0.13995	0.676833
Commd2	3:57642903-57651715	14.1416	10.4549	-0.435769	0.676761	0.24115	0.781007
Gm13136	4:147735476-147738426	1.64638	1.21719	-0.435745	0.552644	0.31795	0.831028
Hmg20a	9:56418643-56496884	4.65295	3.44005	-0.435715	1.16607	0.14545	0.684884
Rnf103	6:71493893-71525020	9.76309	7.21829	-0.435681	0.994066	0.1519	0.694078
Gm13882	2:104143072-104410334	61.5521	45.5145	-0.435483	0.797168	0.16315	0.707071
Gm12224	11:54303797-54364756	85.8098	63.4523	-0.43547	0.656967	0.2547	0.790437
Gm9432	X:12619473-12620232	1.7417	1.28795	-0.435414	0.37967	0.5026	0.915127
Bbs4	9:59321965-59353508	1.93997	1.43476	-0.435219	0.552964	0.3236	0.834281
Gm7879	5:43913172-43913706	5.40502	3.99784	-0.435078	0.403014	0.4993	0.914034
Cib2	9:54538983-54560218	139.888	103.47	-0.435064	0.943689	0.1179	0.643955
Unc45b	11:82910549-82962941	79.2517	58.6205	-0.435037	0.536701	0.1927	0.739069
Gmpr	13:45507443-45546382	174.738	129.25	-0.435027	0.845154	0.113	0.63554
Gm12397	4:40912740-40913355	4.63683	3.42979	-0.435018	0.451951	0.50335	0.915405
Fut10	8:31187330-31261738	6.12901	4.53406	-0.434852	0.715385	0.18975	0.735891
Pdzrn3	6:101149608-101377897	53.2244	39.3769	-0.434737	0.880921	0.1268	0.657528
Twsg1	17:65923065-65951187	13.927	10.3059	-0.434412	1.13055	0.11175	0.633568
Serpinf1	11:75409768-75422701	87.2097	64.5456	-0.434169	0.707332	0.3015	0.819965
Eno3	11:70657201-70662513	4257.53	3151.6	-0.433931	0.49531	0.29545	0.816312
Rnaset2a	17:8128609-8148097	21.9314	16.2393	-0.433507	0.813287	0.1585	0.701592
Antxr2	5:97882782-98030733	2.39329	1.77223	-0.433433	1.3906	0.19195	0.738251
1190002N15Rik	9:94517863-94538081	1.78494	1.32196	-0.433197	0.694909	0.2746	0.803355
Wars2	3:99141067-99239186	2.74906	2.03653	-0.432824	0.369001	0.69095	0.963025
mt-Nd4,mt-Nd4l	MT:9876-11544	54667.9	40501.9	-0.432703	0.234637	0.5415	0.927305
Rtca	3:116488962-116508208	15.3121	11.3447	-0.432652	0.764607	0.17345	0.718578
Fbxl18	5:142866945-142895421	1.87405	1.3887	-0.432426	1.18751	0.28765	0.811449
Cry1	10:85131701-85185054	5.26758	3.90345	-0.432392	0.742354	0.187	0.732895
Hmgb1	5:149046701-149053513	26.8928	19.9306	-0.432238	0.444525	0.5855	0.939292
Tmed1	9:21424907-21510186	32.8871	24.3788	-0.431896	0.626278	0.29395	0.815298
Wnt5b	6:119432530-119544347	6.7772	5.02385	-0.431896	0.477916	0.4325	0.890299
Glrx3	7:137437647-137468594	36.7708	27.2604	-0.431753	0.914328	0.1213	0.649355
Ufm1	3:53855211-53863830	11.0801	8.21498	-0.431645	0.622105	0.15515	0.697629
Gm14633	X:56447887-56448366	95.0507	70.4785	-0.431513	0.809457	0.17045	0.715341
Gm14398	2:181216726-181217799	2.39005	1.77227	-0.431443	0.418375	0.48065	0.907756
Spg7	8:119910359-124345724	105.32	78.1302	-0.43083	0.0135073	0.5954	0.941724
Shfm1	6:6557293-6578658	34.7881	25.8093	-0.430704	1.07282	0.12255	0.65134
Mir5125	17:23790531-23829109	38.2664	28.3948	-0.430454	0.246951	0.66295	0.957898
Ccdc85c	12:108206344-108275417	10.9138	8.10022	-0.430119	0.826716	0.2656	0.797187
Mamstr	7:45639976-45646521	23.8475	17.7004	-0.430052	0.369566	0.50345	0.915426
Maob	X:16709281-16817366	18.0495	13.3972	-0.430025	0.883067	0.11835	0.644345
Herc4	10:63243067-63317881	4.16265	3.09034	-0.429738	0.844276	0.174	0.71909
Nkiras1	14:18267822-18331859	33.2096	24.66	-0.429426	0.348886	0.49895	0.913906
Casc4	2:121866969-121936220	2.1947	1.63002	-0.429133	0.576456	0.27795	0.805417
AC123072.1,DST,Dst	1:33908224-34308661	73.6183	54.6808	-0.42903	0.461859	0.33145	0.839222
Cstf2t	19:30567550-31765033	5.61896	4.17394	-0.428894	1.88343	0.2501	0.78732
Acad8	9:26974134-26999566	20.8517	15.4932	-0.428532	0.602494	0.33235	0.839806
Gm6283	10:127313148-127314148	6.44696	4.79048	-0.428448	0.532626	0.35525	0.852358
Tnnt3	7:142460808-142516009	14778.8	10984	-0.428129	0.420866	0.43565	0.891506
Hpgd	8:56294551-56321046	2.20765	1.6409	-0.42802	0.426578	0.41425	0.88184
Coro6	11:77462410-77470484	129.942	96.5911	-0.427905	0.769774	0.15185	0.694037
Setd5	6:113077364-113153435	7.40917	5.509	-0.427521	0.458065	0.49175	0.911847
RP23-348C6.6	1:34969626-34969855	20.1134	14.9553	-0.427493	0.351318	0.49805	0.91364
Htra4	8:25025450-25102194	3.30773	2.45959	-0.427424	0.265363	0.6503	0.954737
Nacc2	2:26055534-26123220	6.80779	5.0625	-0.427338	0.343596	0.31705	0.830289
3110056K07Rik	12:70974620-71015832	1.93484	1.43914	-0.427008	0.200631	0.81755	0.981404
Sec61b	4:47474657-47483242	42.21	31.3969	-0.426965	0.721689	0.2317	0.77399
Gm14325	2:177831790-177840336	10.1048	7.51621	-0.426958	0.297764	0.66095	0.957447
Gdi1	X:74304997-74311862	24.5582	18.2683	-0.426862	0.643313	0.1574	0.700462
Klc2	19:5107745-5118560	60.701	45.16	-0.426675	0.604562	0.29825	0.817804
Trim26	17:36837133-36859398	11.8204	8.79433	-0.426636	0.646703	0.3033	0.821521
Lamtor5	3:107278857-107284079	39.2741	29.2209	-0.426579	0.837771	0.1634	0.707381
Rfesd	13:76001534-76018712	3.98508	2.96546	-0.426351	0.759406	0.3631	0.85659
Ccdc90b	7:92561148-92637142	16.6294	12.3752	-0.426282	0.618033	0.3071	0.824133
Hist2h3c2	3:96238107-96239127	3.7674	2.80381	-0.426179	0.456463	0.4418	0.894052
Hoxa13	6:52257693-52260880	2.55927	1.90492	-0.425998	0.359985	0.4727	0.905227
Rab40b	11:121356124-121388251	10.0792	7.50381	-0.42569	0.464739	0.2657	0.797243
Gm7129	X:13326022-13327019	16.9324	12.6061	-0.425665	0.703837	0.23935	0.77952
Ttc33	15:5143860-5244187	44.6932	33.2749	-0.42562	0.546015	0.4451	0.895257
Mib1	18:10725547-10818704	6.13247	4.56581	-0.425595	1.14088	0.2251	0.768882
Bnc2	4:84275094-84675275	2.1127	1.573	-0.425565	0.316315	0.3618	0.855842
Kpna4	3:69067148-69127113	19.5166	14.531	-0.425562	0.944716	0.1773	0.722758
Gm14388	7:122288750-122634402	32.858	24.4647	-0.425544	0.547383	0.3469	0.847647
Gm12858	4:118441012-118441220	6.50021	4.84069	-0.425273	0.504984	0.75495	0.973202
Api5	2:94300766-94438136	6.28481	4.68044	-0.425226	0.964964	0.32045	0.832375
Gopc	10:52337023-52382124	3.36936	2.50949	-0.425084	0.788378	0.2029	0.748799
Aga	8:53511701-53523421	7.24501	5.39634	-0.425006	0.603063	0.2939	0.815288
Zfp354a	11:51059256-51072799	5.49959	4.09712	-0.424712	0.381232	0.43905	0.89318
Ppp3r1,Wdr92	11:17159262-17233796	56.8498	42.3545	-0.424639	0.855425	0.1912	0.737401
Dcun1d4	5:73481001-73560794	2.967	2.21049	-0.424637	0.66354	0.2487	0.78632
Scp2-ps2	9:123307507-123307939	241.261	179.759	-0.424529	0.906895	0.12165	0.650024
Fmnl2	2:52857859-53134202	2.31774	1.72703	-0.424424	0.593288	0.3159	0.829667
Arl6ip6	2:53191725-53219220	7.07775	5.27403	-0.424386	0.451358	0.5831	0.938686
Rad1	15:10486017-10499063	2.34113	1.74465	-0.424268	0.449969	0.4963	0.913023
Ccdc101	7:126648542-126676432	49.4441	36.8503	-0.424124	0.353906	0.60575	0.944059
Gm29216	1:24615705-24616197	44464.4	33143.1	-0.423946	0.464506	0.35295	0.850794
Gm5430	17:25326611-25327526	28.5288	21.2666	-0.423826	0.792686	0.16845	0.713164
Chuk	19:44073334-44107480	11.5051	8.57664	-0.423791	0.442765	0.4698	0.904336
Anapc13	9:102584597-102634425	182.906	136.35	-0.423788	0.732192	0.21325	0.758492
Akt3	1:176814659-177258203	1.35124	1.00735	-0.423723	0.600707	0.40195	0.875888
Polg2	11:106751225-106779537	1.7423	1.29909	-0.423495	0.267873	0.61935	0.947418
Arrdc4	7:68737044-68749241	2.99166	2.23095	-0.423288	0.301986	0.7193	0.967978
Tmem18	12:30584442-30591213	5.22636	3.89841	-0.422919	0.866762	0.2005	0.746618
Gm5829	1:71709704-71710055	16.5527	12.348	-0.422786	0.431979	0.45045	0.897469
Zfc3h1	10:115384958-115432772	5.66636	4.22717	-0.422729	0.348015	0.59405	0.941496
Trmt61b	17:71526895-71598755	1.75658	1.31046	-0.422692	0.359582	0.53435	0.925226
Hist1h2be	13:23583741-23621124	15.0995	11.2669	-0.422416	0.310806	0.64735	0.954033
Gm12933	4:126665253-126666125	13.648	10.184	-0.422385	0.625369	0.3035	0.821698
Itpa-ps1	2:94300766-94438136	24.2468	18.0949	-0.42221	0.440455	0.5265	0.922976
Sp3	2:72936426-72988677	9.81894	7.32846	-0.422058	0.552765	0.3282	0.83713
Igfals	17:24878769-24882008	4.8686	3.63375	-0.422046	0.645697	0.24865	0.78632
Galk2	2:125830303-126152004	1.94279	1.45016	-0.421918	0.158301	0.704	0.965435
Exoc6	19:37550417-37683245	11.8022	8.80993	-0.421854	0.847428	0.14385	0.682637
Tonsl	15:76622087-76639958	37.3596	27.8922	-0.421617	0.805243	0.1735	0.718633
Nedd8	14:55662264-55671906	64.6687	48.2823	-0.421574	0.988253	0.13485	0.669616
Crtc3	7:80586626-80688877	6.01997	4.49567	-0.421221	0.564205	0.19245	0.738756
Hook3	8:26021420-26119224	6.11472	4.56728	-0.420952	1.89884	0.1251	0.654753
Spata2	2:167481132-167516173	9.18807	6.8631	-0.420901	0.286533	0.4633	0.902012
Mpp5	12:78748946-78840711	10.6705	7.9714	-0.420717	1.08544	0.12315	0.651954
Snx18	13:113592179-113618564	4.38869	3.27866	-0.420685	0.97876	0.1601	0.703373
Wdr7	18:63708694-63989760	4.92048	3.67609	-0.420629	1.33577	0.1317	0.664817
Gm15267	X:152016427-152062694	13.4896	10.0784	-0.420573	0.256925	0.64755	0.954097
Lcmt1	7:123377981-123430358	14.8552	11.1003	-0.420365	0.765287	0.24535	0.783982
Gm15616	5:71699931-72138389	31.3803	23.454	-0.420027	0.545656	0.33625	0.841938
Hoxa10	6:52231196-52240854	8.08381	6.043	-0.41977	2.57943	0.30185	0.820306
Ufsp1	5:137294628-137295665	27.3512	20.4489	-0.419576	0.758423	0.18735	0.733111
Snx27	3:94497549-94582702	7.26766	5.43428	-0.419401	1.53997	0.13	0.662426
Chchd1	14:20703026-20704417	95.8866	71.7006	-0.419343	0.886569	0.1407	0.678006
Lama2	10:26980035-27619758	2.15568	1.61199	-0.419301	0.463909	0.23085	0.773508
Cyp4f13	17:32924687-32947402	7.18472	5.37274	-0.419273	0.364049	0.5581	0.932162
Zswim7	11:62267223-62281375	37.1344	27.7722	-0.419118	0.77031	0.1793	0.724893
Fam20c	5:138754513-138810077	8.38807	6.27329	-0.419115	0.559756	0.28655	0.81061
mt-Nd5	MT:11741-14070	9297.03	6953.14	-0.419105	0.464991	0.35715	0.853236
Guf1	5:69556923-69592337	3.2648	2.44215	-0.418844	0	1	1
C1d	11:17257578-17269176	25.7612	19.2713	-0.418744	0.335759	0.6315	0.950184
Pank2	2:131262494-131352892	16.4275	12.2891	-0.418734	0.341582	0.5861	0.939369
Lmtk2	5:144100435-144188204	4.26706	3.19226	-0.418665	1.68979	0.1318	0.665051
Gm16378	8:119910359-124345724	154.901	115.888	-0.418625	0.00868923	0.76955	0.975114
Exoc7	11:116288000-116309510	67.2826	50.344	-0.418415	0.640242	0.31045	0.826307
Plet1os	9:50488794-50507823	15.9355	11.9247	-0.418285	0.656951	0.26155	0.794184
Ddx26b	X:56454856-56507843	7.75445	5.80302	-0.418219	0.377123	0.50255	0.915107
Gm5510	19:6134373-6172476	153.168	114.647	-0.417914	0.541116	0.329	0.837554
Ccdc43	11:102684685-102697782	20.6267	15.4424	-0.417618	0.928928	0.16485	0.709226
Nprl3	11:32225627-32267707	17.6294	13.1996	-0.41749	0.477726	0.37645	0.863589
Gm8337	1:47657692-47659630	7.62971	5.71288	-0.417411	0.762258	0.1941	0.740559
Zbtb12	17:34856373-34898265	10.34	7.74373	-0.417139	0.342051	0.48865	0.910896
Gm13562	2:26352175-26380653	1.54799	1.15945	-0.416958	0.172083	0.80395	0.979781
Ebag9	15:44619640-44641024	11.2151	8.40048	-0.416892	0.754119	0.2012	0.747254
Dcaf11	14:55559941-55576952	214.574	160.735	-0.416789	0.220041	0.54385	0.928119
Klhdc4	8:119910359-124345724	7.30313	5.47109	-0.416685	0.00430162	0.628	0.949591
2810021J22Rik	11:58867215-58883288	1.66287	1.2459	-0.416487	0.243599	0.5391	0.926627
Mtmr11	3:96162003-96177564	1.4899	1.11637	-0.416408	0.165954	0.67435	0.960228
Folr2	7:101839989-101845331	5.80983	4.35434	-0.416041	0.548893	0.3757	0.863218
Gm9457	8:4812816-4813212	35.7691	26.8094	-0.415977	0.694132	0.23815	0.778626
Wdr47	3:108591278-108645719	2.24418	1.6823	-0.415754	0.381938	0.3223	0.833495
Msi2	11:88339381-88718513	15.4175	11.5579	-0.41569	1.51303	0.1175	0.64308
Msh2	17:87672329-87723713	8.68856	6.51443	-0.415478	0.525366	0.2229	0.766765
Nog	11:89300637-89302332	2.97657	2.23175	-0.415476	0.464344	0.4115	0.880441
Cdk7	13:100669480-100730942	1.66621	1.24939	-0.415343	0	1	1
Gm5239	18:35536582-35536951	14.0852	10.5624	-0.415236	0.418456	0.4528	0.898108
Upf1	8:70315774-70353273	6.79701	5.09722	-0.415188	1.45236	0.20025	0.746351
Epdr1	13:19591708-19619830	81.5636	61.174	-0.415006	0.868394	0.12605	0.656306
Gm13498	2:50909683-50911849	11.9487	8.96184	-0.414988	0.793264	0.17075	0.715714
Man2a2	7:80349097-80371375	50.6048	37.9577	-0.41488	0.819461	0.1413	0.67879
Gm13815	2:92561268-92561680	3.56882	2.67728	-0.414678	0.311874	0.6007	0.942995
Slc44a2	9:21337827-21355025	44.5747	33.4403	-0.414637	1.01237	0.1322	0.66569
Gm10653	9:62838784-62875918	7.26164	5.44783	-0.414612	0.313751	0.5979	0.942332
Plau	14:20836661-20843388	9.69551	7.27407	-0.414555	0.767198	0.1892	0.735193
Fhod1	8:105326353-105347953	17.3239	13.0007	-0.414172	0.477243	0.2907	0.813074
Lepr	4:101717403-101815352	2.19975	1.65082	-0.414158	0.0905171	0.72685	0.969155
Mtmr2	9:13748409-13806481	3.50396	2.6299	-0.413981	0.66316	0.26005	0.793028
R3hcc1l	19:42518758-42592343	6.12138	4.59535	-0.413682	0.449636	0.4152	0.88235
Ccdc47,Strada	11:106163329-106216344	60.2458	45.2366	-0.413372	0.535499	0.41865	0.883676
Gm14253	2:156311846-156375638	13.1091	9.84421	-0.413226	0.371059	0.51735	0.91978
Ptpn2	18:67665510-67724595	5.65883	4.24959	-0.413178	0.526886	0.4207	0.884681
Cdk5rap3	11:96907425-96982959	15.3692	11.5428	-0.41305	0.429472	0.5003	0.914343
Pdcd7	9:65346067-65359642	6.56656	4.93267	-0.412771	0.840699	0.19345	0.739844
Tspan9	6:127961395-128143594	7.86112	5.9056	-0.412652	0.597587	0.28355	0.808617
Nr3c2	8:76605225-77245012	3.57687	2.68716	-0.412614	0.576543	0.23415	0.775867
Ap3s2	7:79875331-79920640	8.07809	6.06921	-0.412506	1.15154	0.1361	0.671227
Rps12-ps16	X:125986965-125987364	11.4605	8.61129	-0.412363	0.407408	0.49035	0.911412
Gm9144	12:7859826-7861205	29.1385	21.8998	-0.412008	0.835615	0.15035	0.691899
Mlx	11:101087276-101095436	13.9951	10.5206	-0.411708	0.556828	0.30875	0.825221
Gm5283	3:17230641-17230975	1.39355	1.04768	-0.411574	0.197723	0.7663	0.974738
Fpgs	2:32646594-32704145	8.60169	6.46696	-0.411533	0.348338	0.51665	0.919593
B4galt7	13:55599895-55610443	3.24521	2.44023	-0.411294	0.60891	0.5308	0.924145
Fez2	17:78377884-78418131	26.4424	19.8835	-0.411283	0.864857	0.1387	0.675063
Dram2	3:106481981-106575890	36.5935	27.5236	-0.410918	0.565315	0.42875	0.888564
Cnot6	11:49671502-49712723	2.20614	1.65935	-0.410906	0.269739	0.5169	0.919665
Agbl5	5:30888693-30907788	2.54921	1.91752	-0.410809	0.231604	0.58705	0.939497
Rraga	4:86575667-86577285	43.182	32.494	-0.410254	0.903315	0.1355	0.670557
Psmd6	14:14112183-14120984	114.014	85.802	-0.410124	0.810118	0.1824	0.727993
Gm14857	X:106281911-106285096	6.47588	4.87429	-0.409883	0.745723	0.1908	0.736947
Cbwd1	19:24919915-24961616	7.78883	5.86266	-0.409852	0.724412	0.21945	0.763808
Gm10482	5:10187865-10237890	1.72921	1.30181	-0.409592	0.172097	0.84645	0.984451
Slc45a4	15:73577423-73645762	10.6592	8.02491	-0.409542	0.598787	0.1697	0.714414
Rae1	2:173000116-173015739	13.0447	9.82226	-0.409335	0.480075	0.405	0.877307
Nicn1	9:108290428-108296498	9.26654	6.9778	-0.409258	0.535703	0.26315	0.795407
Alg6	4:99715663-99763460	5.9816	4.50462	-0.409124	0.30744	0.6411	0.95253
Agtrap	4:148077060-148088031	7.66635	5.77356	-0.409078	0.424173	0.30125	0.819787
Rps12-ps10	2:122219992-122220391	27.5518	20.7507	-0.408983	0.511789	0.3746	0.862589
Pstpip2	18:77793258-77882007	8.99466	6.7748	-0.40889	0.644249	0.25995	0.793002
4933426M11Rik	12:80790531-80880832	15.4756	11.6563	-0.408886	2.78478	0.12195	0.650476
Blvra	2:127070664-127097084	10.7296	8.08166	-0.408871	0.639639	0.2735	0.802467
Echdc2	4:108165436-108179308	22.0058	16.5812	-0.408331	0.50406	0.36715	0.858849
BC024978	7:27187004-27205386	8.10273	6.10689	-0.407969	0.320653	0.6516	0.954979
Zfp626	7:27810812-27818669	1.99721	1.5054	-0.407842	0.322354	0.566	0.934315
Gm16470	19:40212381-40213379	56.5968	42.6606	-0.407815	0.816109	0.1502	0.691686
Mapk9	11:49846750-49886421	13.1772	9.93412	-0.407584	0.874786	0.1238	0.652697
Gm12034	11:20446411-20446810	28.3323	21.36	-0.407536	0.558194	0.31145	0.826742
Cdc14b	13:64192544-64274973	2.29785	1.7326	-0.407345	0.70639	0.25395	0.789952
Gm28437	1:24613188-24613971	28748.8	21676.9	-0.407345	0.392312	0.44245	0.894279
C2cd2	16:97855209-97922633	30.5144	23.0092	-0.407282	1.11567	0.14895	0.689877
Ola1	2:73092800-73218924	21.5246	16.2361	-0.406787	0.724437	0.20195	0.74796
Pkdcc	17:83215291-83225070	75.0476	56.6152	-0.406616	0.659219	0.25095	0.787687
Cops7a	6:124958412-124965538	143.15	108.012	-0.406341	0.42362	0.50945	0.9175
Snrpc	17:27839973-27851968	30.3639	22.9118	-0.406263	0.833568	0.2689	0.799405
Gm13196	2:4700237-4700616	30.3169	22.878	-0.406162	0.861918	0.2927	0.814396
Fam208b	13:3538074-3611108	1.533	1.15707	-0.405879	0.246373	0.65695	0.956288
Fnbp4	2:90745369-90781021	10.1737	7.67893	-0.405867	0.482599	0.3274	0.836558
Gm12693	4:94935620-94936103	126.994	95.8764	-0.405511	0.929568	0.1492	0.69022
B230118H07Rik,Rag1	2:101560780-101649532	128.818	97.2608	-0.405399	0.548446	0.353	0.850832
Zfp641	15:98285587-98296130	5.71542	4.31539	-0.40537	0.790536	0.1789	0.724609
Gm6028	1:111880734-111881308	5.06148	3.8218	-0.405304	0.370696	0.5311	0.924249
Tamm41	6:115004380-115037876	5.26221	3.97359	-0.405225	0.382071	0.51855	0.920228
Atl2	17:79848391-79896123	64.9448	49.0429	-0.40517	0.963903	0.1511	0.692903
[truncated: 10,669 more rows]

## Sheet: KO_AL_vs_WT_DR Brain
gene	locus	WT_DR Brain FPKM	KO_AL Brain FPKM	log2(fold_change)	test_stat	p_value	q_value
Kcnj2	11:111066163-111076821	2.62517	2.62501	-9.04197e-05	0.000186329	0.99605	0.999051
Oxt	2:130576172-130577054	27.7329	2.05736	-3.75273	3.89892	0.00555	0.166447
Snora28	12:111538100-111546753	28.6151	2.53173	-3.49858	0.38981	0.32075	0.832548
Gm27038	17:94750099-94834799	6.45678	1.00797	-2.67937	0.60146	0.37045	0.860444
Snord55	4:117153826-117156243	1041.74	178.334	-2.54634	0.267293	0.3173	0.83043
Gm13577	2:64474744-64474957	21.4982	3.71419	-2.5331	2.79788	0.04215	0.448468
1810032O08Rik	11:116671659-116694868	20.8105	3.67495	-2.50152	2.03723	0.0071	0.190148
Hcrt	11:100761068-100762931	16.8178	3.10083	-2.43927	2.45537	0.34425	0.846014
Gm10784	13:49945095-49945335	9.97854	1.952	-2.35387	2.03777	0.07855	0.56698
Gm28580	1:69826969-70725132	49.4302	10.2335	-2.27209	10.667	0.47865	0.90711
Epc1	18:6435950-6516108	49.6629	10.3579	-2.26143	0.368549	0.16195	0.705801
Avp	2:130580619-130582554	34.6107	7.93938	-2.12412	2.58298	0.0008	0.051952
Gm15151	X:151758016-151758193	6.71075	1.61802	-2.05224	1.387	0.2175	0.762127
Gm14794	X:88749451-88749643	8.88951	2.16665	-2.03664	1.53371	0.1502	0.691687
Gm17366	14:106698108-106698298	19.0267	4.64041	-2.0357	2.11978	0.1235	0.652413
Ckap5	2:91526761-91620664	33.539	8.2757	-2.01889	3.13979	5e-05	0.00661738
Gm23257	4:43692685-43692817	7.54019	1.96379	-1.94096	2.76896	0.41825	0.883512
Snord100	10:23785210-23787195	133.233	35.0463	-1.92661	6.33657	0.48525	0.909704
Gm15432	X:29564013-29564208	30.4927	8.05002	-1.9214	0.981483	0.10225	0.616001
Gm17181	1:87476833-87597845	184.465	49.4354	-1.89973	0.0928268	0.2753	0.803788
Pmch	10:88091071-88146941	39.7985	11.2974	-1.81672	1.63482	0.02125	0.332439
Nucb2	7:116504368-116540554	7.41585	2.10675	-1.81559	1.68881	0.002	0.092594
Gm27529	15:7873054-8099209	198.936	58.4604	-1.76677	0.366482	0.4204	0.884449
Gck	11:5900819-5950081	3.72331	1.11457	-1.7401	1.25726	0.03015	0.38989
Gm13653	2:75138841-75322897	13.5237	4.08299	-1.72779	0.299829	0.39755	0.874012
Rsl1d1	16:11192969-11203331	25.6446	7.95668	-1.68842	4.49016	5e-05	0.00661738
Gm5269	1:45889524-45890273	5.77431	1.79618	-1.68472	2.42039	0.5287	0.923665
2610034M16Rik	17:58878807-58991375	3.27173	1.02915	-1.6686	1.41524	0.0291	0.383973
Zfp930	8:69226342-69228980	4.54318	1.44343	-1.6542	2.19893	0.006	0.173843
Rsph1	17:31255018-31277356	3.75072	1.19555	-1.64949	1.62528	0.0174	0.301929
Gm26384	17:21284102-21284212	14.1178	4.57319	-1.62624	4.21379	0.41545	0.882517
Tusc2	9:107551554-107572779	177.137	57.7683	-1.61652	1.33161	0.05355	0.492331
Gm14399	2:175129492-175142012	7.1344	2.3394	-1.60866	0.854533	0.0987	0.609148
Gm27517,Gm27624,Gm27640,Gm27937,Tug1	11:3639784-3690477	131.314	43.3372	-1.59934	0.740662	0.11	0.630718
4930481A15Rik	19:5406739-5424979	2.97426	1.0078	-1.56132	0.515	0.3067	0.823981
Bex4	X:136138995-136140443	21.636	7.50394	-1.52771	2.337	0.0006	0.0429038
Pfdn4	2:170482707-170519123	20.0762	7.04454	-1.51091	1.88078	0.01095	0.238932
Gm12261	11:59577991-59578636	3.08793	1.08671	-1.50667	1.1763	0.0609	0.516896
Rcan3	4:135412307-135433853	159.593	56.5396	-1.49707	4.62385	0.0359	0.420029
Gm15860	5:123334331-123374082	3.1071	1.10546	-1.49092	0.207549	0.32385	0.834487
Gm15502	5:137892931-137921619	47.5046	16.9513	-1.48667	2.19609	0.1973	0.743408
Tac2	10:127724477-127731767	3.18638	1.14786	-1.47297	1.13886	0.06325	0.524362
Pyurf	6:57684738-57692078	34.7379	12.5244	-1.47177	0.722022	0.1281	0.659325
Hsp90b1	10:86685600-86705509	154.319	55.7284	-1.46944	0.408204	0.13105	0.664
Krt9	11:100186780-100193246	4.29253	1.55692	-1.46313	1.94754	0.00535	0.162687
Aif1	17:35170990-35176068	7.06201	2.56874	-1.45902	1.46647	0.042	0.447907
Sf3a3	4:124714775-124732460	8.50559	3.11246	-1.45036	2.1577	0.00125	0.0688842
Gm13360	2:19909779-20810713	4.07415	1.49394	-1.44738	0.294408	0.5065	0.916398
Lbr	1:181806000-181843046	7.96057	2.92436	-1.44475	1.45985	0.0349	0.415357
Gm3355	17:13482552-13906150	16.3268	6.0684	-1.42785	0.473947	0.41095	0.880211
DQ267102	12:109603881-109661716	130.748	48.8291	-1.42098	2.77949	0.5946	0.941536
Mphosph10	7:64376575-64392268	5.04675	1.89811	-1.41079	1.9254	0.00265	0.108926
RP24-272N10.3	1:164462441-164463989	3.03281	1.14272	-1.40819	1.19571	0.0706	0.545564
Hmgb1-ps9	13:101038598-101039246	2.81769	1.07489	-1.39033	1.13601	0.0857	0.583095
Krt10	11:99385253-99389364	4.26682	1.63066	-1.3877	1.99534	0.00695	0.187982
Mier1	4:103038064-103165754	10.1744	3.88983	-1.38716	0.649945	0.03275	0.403786
Hmgb1-ps1	11:41141762-41142396	6.01727	2.32943	-1.36914	1.32633	0.04215	0.448468
Gm27684	7:115172272-115172352	209.74	81.8965	-1.35673	0.625825	0.2415	0.781252
Crip1	12:113152011-113153877	2.66331	1.04992	-1.34294	0.787597	0.1903	0.736381
Gm10925	1:24613973-24614651	7785.12	3090.2	-1.33302	1.24772	0.0325	0.402367
Emc2	15:43477228-43527777	14.5153	5.7973	-1.32412	2.06474	0.0012	0.0670609
Mars	10:127289695-127311786	20.8572	8.35645	-1.31958	1.24928	0.01715	0.299768
Gm16415	18:42441018-42441507	4.79403	1.92227	-1.31843	1.09948	0.1023	0.616033
Eif3m	2:104867804-105017904	12.3518	4.95437	-1.31794	2.41439	0.0023	0.100221
Tacc3	5:33658127-33678995	2.79079	1.1226	-1.31383	0.849546	0.09055	0.59318
Gm15209	X:162894754-162895154	2.8053	1.13352	-1.30734	0.865426	0.13745	0.673208
Fbxo11	17:87975049-88065291	27.1717	11.1111	-1.2901	1.75514	0.00905	0.216695
Ptn	6:36715662-36811361	63.1305	26.0984	-1.27438	2.74423	0.00035	0.0292274
Dbpht2	12:74297473-74300468	9.36477	3.88653	-1.26876	2.18965	0.00155	0.0790897
1700003M07Rik	4:129960373-129963657	6.62036	2.75423	-1.26526	1.40362	0.03535	0.417315
Cox6b2	7:4751791-4753094	3.59295	1.49868	-1.26148	0.958301	0.05715	0.504304
Fbxo36	1:84721188-84900487	2.935	1.22445	-1.26123	0.408322	0.57645	0.937198
Gm11663	11:104550662-104595753	7.10882	2.98603	-1.25138	0.302482	0.53995	0.926848
Dmrtc1a	X:102903215-102908687	2.92133	1.2292	-1.24891	1.28467	0.05745	0.505336
Msrb3	10:120781095-120899101	3.0779	1.30393	-1.23907	1.25846	0.0392	0.43513
Gm14450	X:5984771-5985011	21.6536	9.22894	-1.23037	0.762364	0.18155	0.727228
Rab26os	17:24488782-24534210	5.16734	2.20656	-1.22762	0.0898385	0.4462	0.895647
Rpl21-ps4	14:11227551-11227992	16.1083	6.88337	-1.22662	1.41171	0.0289	0.38277
Hkdc1	10:62383136-62422491	4.73255	2.02387	-1.2255	0.977532	0.00815	0.204927
Sln	9:53850250-53853844	2.98142	1.27684	-1.22342	1.08021	0.10535	0.62188
Gm6457	18:14570100-14570915	18.5975	7.97716	-1.22116	1.89645	0.0073	0.193269
Gm25085	7:59540869-59540948	62.5895	26.8889	-1.21891	14.2654	0.53185	0.924501
Flt3l,Rpl13a	7:45125557-45136432	272.195	117.186	-1.21584	1.95189	0.0261	0.365823
Hmgb1-ps6	16:31962505-32003287	2.60274	1.12664	-1.20801	0.360035	0.58215	0.938482
Gm7241	1:132284452-132284809	5.65319	2.45478	-1.20347	0.921721	0.11595	0.640751
Apoa2	1:171225053-171226379	4.44503	1.93904	-1.19685	0.954186	0.0829	0.577001
Gm20746,Gm26445	10:130592135-130592705	16.2246	7.09458	-1.19339	0.399672	0.33935	0.843517
Gm8054	8:78869400-78869868	8.53952	3.74385	-1.18963	1.21787	0.057	0.503887
Paip1	13:119428600-119458218	19.6086	8.60136	-1.18885	1.40576	0.0317	0.397855
Gstk1	6:42245934-42250441	5.99725	2.64194	-1.1827	1.55396	0.01835	0.310069
Fam71e1	7:44496587-44501134	5.90212	2.60339	-1.18084	1.26337	0.0309	0.393715
Polr2g	19:8793128-8798557	23.0528	10.1979	-1.17667	2.02178	0.00275	0.111088
Mtdh	15:34082693-34142386	19.1253	8.49065	-1.17153	1.71435	0.00705	0.189449
Zscan18	7:12768091-12775658	8.86392	3.94428	-1.16818	2.09011	0.00305	0.118456
Chgb	2:132781277-132795079	238.356	106.729	-1.15917	3.08819	0.00055	0.0403981
Ccdc160	X:52791199-52799468	2.64886	1.19458	-1.14886	1.41187	0.03765	0.428217
Gm25328	14:20674320-20703012	13.6445	6.15885	-1.14759	0	1	1
Rpl22l1	3:28805435-28813985	83.1814	37.6823	-1.14237	1.73774	0.0107	0.236048
Pik3ca	3:32397670-32468486	10.904	4.95379	-1.13826	0.93805	0.09815	0.608049
Gjb2	14:57098599-57104702	6.50414	2.96325	-1.13418	1.75194	0.00495	0.156327
Gm16418	1:166431704-166431875	1437.13	655.439	-1.13266	1.85125	0.00705	0.189449
Gm12045	11:21491313-21491886	4.39634	2.00639	-1.1317	0.900632	0.1255	0.655447
Gm11578	1:60592250-60592709	22.8588	10.4328	-1.13163	1.54081	0.0203	0.325501
Gm15289	13:111361675-111368680	3.75813	1.71612	-1.13087	1.04404	0.5377	0.926164
Gm5417	15:83375606-83464606	6.46227	2.95372	-1.12951	0.236023	0.601	0.943045
Rfc3	5:151642755-151651242	6.33413	2.89839	-1.1279	0.937775	0.11585	0.640559
Slc8b1	5:120511167-120534024	4.3429	1.98768	-1.12757	0.758046	0.1861	0.732171
Ranbp1	16:18239783-18289249	28.2314	12.9323	-1.12632	0.812546	0.20085	0.746922
Hmgn5	X:109004533-109013404	3.269	1.49959	-1.12428	1.60843	0.02415	0.352794
Aaed1	13:64291835-64312710	2.83471	1.30054	-1.12409	1.39959	0.0673	0.535794
Gm11838	4:14623619-14796060	88.3168	40.5232	-1.12394	1.42701	0.0222	0.338866
Bbs4	9:59321965-59353508	11.2475	5.19277	-1.11503	2.03307	0.0022	0.0976793
mt-Nd3	MT:9458-9806	2564.85	1186.95	-1.11162	1.79145	0.00145	0.0756865
Dcdc2a	13:25056003-25210706	4.21239	1.94964	-1.11143	0.994872	0.0801	0.57062
1700086L19Rik	12:74284280-74295945	11.739	5.44124	-1.1093	1.46628	0.02345	0.347762
D930015E06Rik	3:83897654-84040175	2.33357	1.08197	-1.10888	0.675291	0.14495	0.684172
Gm14336	2:173920351-173920826	18.556	8.61667	-1.10668	1.36435	0.0326	0.402976
Psma5	3:108248908-108279974	5.89983	2.74399	-1.1044	1.04245	0.04885	0.475898
Gm13998	2:119878068-119878403	2.56126	1.1918	-1.10371	0.68623	0.24455	0.783414
Colq,Hacl1	14:31523081-31668579	5.04521	2.34789	-1.10355	0.470412	0.1617	0.705487
Gm13498	2:50909683-50911849	7.43393	3.47236	-1.09821	1.91304	0.0038	0.134443
Gm13071	4:149500632-149501008	3.12471	1.46168	-1.0961	0.778019	0.186	0.732171
AF357355,DQ267100,Gm23508,Gm24895,Gm27350,Rian	12:109603881-109661716	1178.63	553.125	-1.09143	0.258984	0.1619	0.705765
Lyrm2	4:32800252-32801559	9.99272	4.71805	-1.08269	1.15526	0.04435	0.457977
Gm6740	14:52861766-52862630	3.02521	1.43021	-1.08081	1.21213	0.05125	0.484352
Podxl	6:31519487-31563981	11.0816	5.24623	-1.07882	1.18454	0.01315	0.262248
E130311K13Rik	3:63914683-63929472	6.14959	2.91311	-1.07793	1.55588	0.02755	0.374513
Gm5778	10:73099341-74649737	6.6414	3.14695	-1.07753	0.856679	0.22395	0.767953
Gm15782	6:149353381-149353826	10.2802	4.87124	-1.07751	1.14598	0.0467	0.467541
Rps19-ps3	4:147821776-147822202	104.69	49.6411	-1.07652	1.55083	0.0195	0.319127
Apaf1	10:90989310-91082770	3.23407	1.53931	-1.07107	0.834839	0.06875	0.539967
Gm28438	1:24612774-24613119	1906.82	908.013	-1.07038	1.75174	0.0036	0.130527
Trim12a	7:104244456-104353362	2.29674	1.09725	-1.06569	0.64865	0.26635	0.797716
Itpkc	7:27207171-27228628	6.20304	2.96854	-1.06322	1.09685	0.09085	0.593632
Gm18699	1:89048973-89049216	4.34731	2.08652	-1.05902	0.83908	0.30195	0.820374
Zfp418	7:7171329-7183562	2.28786	1.09822	-1.05882	1.54791	0.02875	0.381828
Cct2	10:117050997-117063814	22.9926	11.0716	-1.0543	2.9046	0.00345	0.127343
Smarce1	11:99209046-99231017	12.413	5.99362	-1.05035	1.45981	0.00525	0.161451
Ntf3	6:126101412-126166744	2.45923	1.18755	-1.05022	1.13463	0.09535	0.602286
Gm11918	4:29125945-29126124	8.27934	4.0043	-1.04797	0.864941	0.33695	0.842253
Rps27l	9:66946085-66949516	5.46778	2.64824	-1.04592	0.724966	0.0907	0.593297
Gm26528	10:22158568-22374139	2.99605	1.45562	-1.04143	0.07151	0.5975	0.94221
Ube2nl	7:61549242-61549701	3.96599	1.92721	-1.04117	0.914103	0.11695	0.642173
Igkc	6:70726434-70726757	7.75569	3.76926	-1.04097	0.905941	0.11915	0.646001
Tfb1m	17:3326572-3557713	2.63433	1.28182	-1.03924	0.411254	0.45915	0.900418
Gm12281	11:62697217-62697515	2.21725	1.07996	-1.0378	0.714902	0.3312	0.839039
Gpbp1l1	4:116557657-116600266	13.5734	6.61976	-1.03593	0.815084	0.2435	0.782667
Tpd52-ps	8:79680265-79680824	9.2093	4.49149	-1.0359	1.23465	0.05715	0.504304
Erdr1	Y:90784737-90816464	10.6163	5.18713	-1.03327	1.34855	0.06135	0.518107
Gm12854	4:116066964-116075071	6.42472	3.14159	-1.03214	0.191539	0.6624	0.95785
Zc3h8	2:128926267-128944077	2.19731	1.07524	-1.03108	1.15502	0.0537	0.492871
RP23-145F9.2	1:171676683-171681980	4.93587	2.41905	-1.02887	0.786154	0.1479	0.688127
Gm14541	X:36823736-36874111	6.61988	3.24505	-1.02856	0.42801	0.60615	0.94413
Nup93	8:94214596-94315066	3.53804	1.73464	-1.02831	1.87253	0.0143	0.273419
Gm4895	10:22153279-22154416	23.1703	11.36	-1.02831	1.87117	0.00715	0.190925
Dock2	11:34226814-34783892	3.4376	1.68784	-1.02623	0.481526	0.3823	0.866697
Gm6368	X:141980174-141982321	26.979	13.2636	-1.02436	2.02747	0.0031	0.119489
Rad50	11:53649518-53707319	3.14732	1.55024	-1.02163	1.28391	0.00765	0.198199
Hrsp12	15:34484020-34495255	15.0663	7.42118	-1.0216	1.52465	0.0107	0.236048
Ephx1	1:180976157-181020904	18.6046	9.16624	-1.02126	0.442926	0.14055	0.677791
Elk4,Slc45a3	1:131962953-132068062	8.04697	3.9648	-1.0212	0.718309	0.1616	0.705418
Tpmt	13:47025169-47084613	4.54078	2.23759	-1.021	0.46227	0.4024	0.876102
Gm7329	1:65095226-65095436	51.6486	25.451	-1.021	0.989199	0.1035	0.618255
Plk2	13:110395043-110400844	42.1884	20.7905	-1.02092	2.20577	0.0011	0.0635893
Ifitm1	7:140967220-140969825	2.61089	1.287	-1.02053	0.878378	0.1099	0.630455
Gm15773	7:12581469-12606544	15.2845	7.53479	-1.02043	1.86406	0.0068	0.185731
Gm5871	5:109016197-109016915	3.52791	1.74164	-1.01836	1.13225	0.1016	0.614848
A130010J15Rik,Irf6	1:193153110-193201703	4.58783	2.26505	-1.01827	0.897442	0.06935	0.541757
4933427G23Rik	5:23787710-23831897	2.57783	1.27405	-1.01673	0.308507	0.62755	0.949375
Zfp946	17:22424221-22456689	4.14918	2.05316	-1.01498	1.2442	0.0433	0.453365
Gm13339	2:22227502-22618252	156.218	77.3699	-1.01372	0.269845	0.7378	0.970667
S100a11	3:93520487-93526287	3.3806	1.67517	-1.01297	0.801447	0.16155	0.705386
Lrrc16a	13:24012343-24280795	7.32401	3.63851	-1.00928	0.955746	0.0614	0.518201
Nudt6	3:37307748-37579096	5.429	2.69765	-1.00898	0.569331	0.3192	0.831717
Fus	7:127967456-127982368	101.021	50.2376	-1.00781	1.01563	0.1691	0.713929
Pbx4	8:69832490-69872292	7.22045	3.5915	-1.0075	1.13833	0.0565	0.502351
Fdx1	9:51943306-51963533	6.11803	3.04466	-1.00679	1.2183	0.0596	0.512385
Acyp2	11:30505990-30649587	10.0897	5.02285	-1.0063	1.02855	0.0997	0.610929
C2,Cfb,Gm20547	17:34856373-34898265	4.61277	2.29704	-1.00586	0.546471	0.3425	0.84504
Gm14391	2:175191064-175206917	3.19367	1.59167	-1.00468	0.986643	0.0768	0.562608
Zfp59	7:27842854-27855086	2.27577	1.13799	-0.99987	1.32679	0.07145	0.547545
Ranbp3l	15:8968425-9066551	1.99079	1.00059	-0.992488	0.763102	0.11225	0.634241
Inpp5d	1:87620311-87720507	6.53102	3.28752	-0.990307	0.633334	0.1796	0.725224
Gm10068	1:58646687-58695989	26.4657	13.3476	-0.987543	1.37825	0.0264	0.367636
Gm15596	6:18156336-18157120	2.20543	1.11366	-0.985749	0.76	0.19685	0.743072
Sub1	15:11981338-11996983	87.0146	44.0494	-0.982136	0.833029	0.1178	0.643815
Gm14131	2:149356686-149357405	4.61947	2.34274	-0.979529	1.11375	0.06885	0.540274
Rars	11:35808380-35834506	16.9035	8.58403	-0.977597	1.39034	0.02165	0.334956
Gm5093	17:46439577-46440099	7.83035	3.97784	-0.977094	1.03502	0.06165	0.519123
Gm12097	11:30505990-30649587	4.04717	2.05605	-0.977036	1.07293	0.0797	0.569578
Mthfd1l	10:3973117-4167081	2.28153	1.16057	-0.97517	1.32877	0.0307	0.392508
Gabpb1	2:126627441-126683805	3.9295	2.00233	-0.972667	1.12923	0.0155	0.284791
Mospd2	X:164936168-164980375	2.46772	1.25864	-0.971321	0.928492	0.07215	0.549621
Gm16378	8:119910359-124345724	41.731	21.3336	-0.967992	0.0341109	0.5008	0.914521
Gm12504	4:44121892-44124123	5.22448	2.67173	-0.967516	0.495589	0.3459	0.847025
Dpysl2	14:66802863-66868688	22.9467	11.7475	-0.965938	2.35076	0.0033	0.124193
Gm4246	17:36194595-36194811	7.19342	3.6891	-0.963408	0.843213	0.37635	0.863562
Dis3	14:99076633-99254493	2.89726	1.48642	-0.962848	1.24038	0.05785	0.506512
Tmem123	9:7764040-7794333	5.99804	3.0877	-0.957957	1.22346	0.0304	0.391304
Gm25350	7:59619157-59904686	27.133	13.9726	-0.957447	2.52459	0.67625	0.960492
Orc5	5:22486484-22550429	91.9368	47.358	-0.957033	2.14863	0.0118	0.24825
Ndufa4	6:11900372-11907446	189.201	97.6974	-0.953529	1.8206	0.00395	0.137505
Tbc1d31	15:57912198-57970067	2.29839	1.18745	-0.952754	0.858404	0.1185	0.644709
Gm14536	X:13189537-13189675	25.7723	13.3221	-0.951997	0.553937	0.3949	0.87253
Gpx3	11:54902452-54910377	26.4525	13.707	-0.948488	1.48828	0.0098	0.225246
Rpl21-ps12	6:90844977-90845460	15.3959	7.97785	-0.948475	1.18569	0.0675	0.536263
Gm6755	14:53172726-53173590	3.10365	1.60834	-0.948391	1.10658	0.0815	0.573815
Gm8756	13:97434969-97497007	2.13911	1.10896	-0.947798	0.774072	0.1717	0.716738
Ogn	13:49464026-49652746	2.5623	1.32979	-0.946245	0.652844	0.2578	0.791855
Ednrb	14:103814624-103844173	13.1392	6.82146	-0.94573	1.98518	0.0055	0.16556
Thoc7	14:13918443-13961225	27.0635	14.0773	-0.942979	1.81022	0.01335	0.264369
Cep83	10:94688789-94790336	7.25242	3.77272	-0.942856	1.75346	0.0127	0.257616
Spa17	9:37603294-37613720	2.24844	1.17021	-0.942162	0.866703	0.1953	0.741571
Crnkl1	2:145917478-146215039	3.32608	1.73127	-0.941993	0.827976	0.0645	0.527752
Abhd3	18:10644410-10706771	34.5831	18.0148	-0.940882	1.96008	0.00955	0.222255
Hspb11	4:107253592-107279938	2.85346	1.48712	-0.940188	0.624502	0.2955	0.816329
Gm9174	14:70360186-70360444	28.1791	14.6923	-0.939568	0.899571	0.09285	0.59742
H2-Ab1	17:34263208-34269418	3.88753	2.02876	-0.938257	0.840346	0.11675	0.641936
Sp1	15:102406142-102436404	5.61202	2.93516	-0.935082	0.494552	0.14455	0.683655
Fh1	1:175600373-175662116	27.8366	14.5638	-0.934595	0.986863	0.09005	0.59209
Gkap1	13:58233350-58274188	2.74146	1.43458	-0.934319	1.18098	0.0497	0.47902
Metrnl	11:121701543-121716306	5.25738	2.75328	-0.933194	1.91245	0.0286	0.380936
Cgref1	5:30933145-30945480	20.4971	10.7442	-0.931866	1.80808	0.00875	0.212945
Gm5814	17:47410362-47410740	11.7144	6.15057	-0.929494	0.893614	0.11965	0.646783
Slc35f5	1:125560594-125595820	4.02583	2.11441	-0.929029	0.584704	0.20805	0.754147
Rpia	6:70765719-70792232	4.3684	2.29854	-0.926385	1.03803	0.06895	0.540478
Zfp944	17:22337988-22361400	3.47668	1.83154	-0.924657	1.55621	0.0366	0.423578
Gm6517	5:66745834-67057159	5.80328	3.05994	-0.923366	0.287265	0.68035	0.961213
Gm23119	18:74778560-74778700	6.5835	3.48088	-0.919401	0	1	1
C1qbp	11:70977835-70983026	31.9404	16.9092	-0.917575	1.45766	0.0277	0.375333
Cd9	6:125460265-125499668	8.64733	4.57807	-0.917516	1.32525	0.0275	0.374188
Syt10	15:89782392-89841860	3.61113	1.91236	-0.917096	1.79985	0.0428	0.451236
Simc1	13:54503778-54565435	4.26135	2.26307	-0.913031	0.385244	0.24245	0.781861
Crygn	5:24751002-24758008	6.04942	3.22523	-0.907397	0.753595	0.51875	0.92026
Scfd1	12:51377579-51450096	2.04686	1.09291	-0.90524	1.15547	0.05965	0.512566
Plgrkt	19:29348598-29367390	6.40572	3.42087	-0.904998	0.846249	0.1064	0.624094
Farsb	1:78310344-78488897	14.8231	7.91881	-0.90449	0.922525	0.20875	0.754475
Nom1	5:29434663-29453506	7.47826	3.99529	-0.904401	0.93693	0.0948	0.601247
Gm16165	9:22475714-22888280	5.86421	3.13696	-0.902572	0.901921	0.165	0.709339
Gm7327	X:61785380-61786032	47.1875	25.3268	-0.897739	1.70556	0.0121	0.251467
Nln	13:104023438-104109614	5.86055	3.14735	-0.896898	2.47549	0.0122	0.252588
Zic2	14:122475434-122479852	14.1088	7.58303	-0.895747	1.45103	0.0153	0.282692
Gm8775	3:4211717-4213044	6.26184	3.36895	-0.894288	1.19704	0.0605	0.515626
Gm4995	X:142533438-142533870	5.2752	2.84202	-0.892311	0.827544	0.1646	0.708862
Gm5621	9:105560117-105560762	19.5064	10.5118	-0.891942	1.25916	0.05475	0.496565
C4a	17:34809091-34823464	4.82044	2.59796	-0.891783	0.653376	0.18015	0.725535
Upf3a	8:13785614-13798538	20.3447	10.9688	-0.891249	1.955	0.0152	0.281738
Fxyd5	7:31032721-31042481	8.59114	4.634	-0.890592	0.945718	0.0618	0.519659
Snord35a	7:45125557-45136432	42.5834	22.9724	-0.890389	1.67436	0.6461	0.953722
Il18	9:50575272-50581837	6.06876	3.27634	-0.889317	1.04888	0.0841	0.580013
5031420N21Rik	9:72958784-73042779	6.41897	3.46743	-0.888473	0.21648	0.659	0.956932
Golim4	3:75875083-76001136	15.1265	8.17145	-0.888418	0.759271	0.2027	0.748595
Foxf2	13:31625815-31631403	2.18117	1.17865	-0.887966	1.0627	0.0859	0.583529
Sox9	11:112782223-112787760	14.5931	7.88673	-0.88779	1.7598	0.0085	0.209696
Ttc5	14:50765414-50785518	12.3438	6.69054	-0.883595	1.08631	0.08715	0.586345
Atg3	16:45158784-45188538	4.19833	2.27798	-0.882062	1.24907	0.04015	0.440078
Sfr1	19:47731755-47735588	53.1826	28.8565	-0.882056	1.81676	0.0061	0.175458
Mcee	7:64392644-64412121	21.3276	11.5724	-0.882036	1.63983	0.017	0.298265
Snw1	12:87425839-87472299	16.7601	9.09789	-0.881429	1.53968	0.0234	0.347352
Gm17511	7:127286040-127286385	35.9995	19.552	-0.880659	1.12399	0.06825	0.538468
4932418E24Rik	2:26271645-26294557	2.0301	1.10393	-0.878903	0.66048	0.22915	0.772192
Gm15148	X:151493113-151493269	52.5616	28.6179	-0.877089	0.683664	0.2252	0.769019
Gm6776	19:42788946-43388311	9.0594	4.93319	-0.876894	1.21167	0.04095	0.443667
Gm27875,Jpx	X:103493557-103506425	15.7727	8.59163	-0.87643	2.58878	0.4281	0.88817
Akr1b10	6:34384217-34396950	5.81412	3.16708	-0.876407	1.26729	0.0503	0.480922
Serf1	13:100106794-100114571	9.31085	5.07253	-0.876207	1.03633	0.08605	0.583899
Dnttip2	3:122245556-122293547	6.68759	3.64747	-0.874588	0.49287	0.48	0.90749
Gm6984	14:73954999-73955551	59.2158	32.3308	-0.873072	1.43604	0.01845	0.310786
Txndc12	4:108834600-108862127	16.9992	9.28956	-0.871781	1.50506	0.02595	0.364915
Gm11954	11:4002456-4002805	2.21671	1.21221	-0.870784	0.538016	0.34935	0.849085
Gm12988	4:135756217-135756695	50.5786	27.6922	-0.869047	1.32627	0.0237	0.349508
Axin1	17:26138687-26195811	10.4961	5.7485	-0.868596	0.624112	0.1326	0.666121
Gm6829	X:9327748-9328108	31.6551	17.3374	-0.868548	1.10202	0.06925	0.541441
Zfp583	7:6315659-6331285	2.76609	1.51604	-0.867538	0.94716	0.065	0.529
Gcom1,Myzap,Polr2m	9:71478436-71592360	139.928	76.6951	-0.867476	1.3229	0.0451	0.461299
Grk5	19:60889748-61140840	2.08309	1.14201	-0.867148	0.6417	0.24885	0.786354
Bbs7	3:36573141-36613477	4.63775	2.54314	-0.866814	0.358648	0.27425	0.803123
Gm3851	1:119652466-119837613	8.67367	4.76082	-0.865432	0.208288	0.688	0.962563
Lrrc40	3:158036661-158068478	9.05523	4.98	-0.862607	1.05265	0.0728	0.551327
Cep95	11:106789251-106819930	2.03178	1.12055	-0.85854	0.520762	0.27945	0.806334
Pfn1	11:70651849-70654644	131.826	72.7588	-0.857445	1.55386	0.0146	0.276292
H2-Eb1	17:34305876-34316199	2.47132	1.36501	-0.856377	0.976442	0.10125	0.614266
Gm4963	5:137993046-137993424	61.1383	33.7806	-0.85588	1.19388	0.04205	0.448082
Med21	6:146602351-146650602	16.4533	9.09125	-0.855823	0.449724	0.4493	0.896913
RP23-290N20.1	3:45775932-45776191	20.8003	11.5053	-0.85431	1.18199	0.20065	0.746781
Gnptg	17:25188396-25240124	21.7601	12.0443	-0.85334	1.09915	0.07865	0.567229
Igsf5,Pcp4	16:96361667-96525793	174.392	96.5414	-0.853118	1.64379	0.0082	0.205574
2310010J17Rik	7:90124857-90129474	2.22348	1.23104	-0.852942	0.593387	0.296	0.816579
Opalin	19:41062473-41077113	10.7319	5.94234	-0.852802	1.40663	0.01965	0.320372
Gas8	8:119910359-124345724	7.14314	3.9587	-0.851532	0.0440415	0.5138	0.91875
Vps13d	4:144972621-145195005	14.5195	8.05173	-0.85062	0.501497	0.16635	0.710822
Gm15610	5:8966032-8997427	30.0166	16.6672	-0.848752	0.327613	0.5836	0.9388
Zfp958	8:4625839-4629380	3.1515	1.74996	-0.848711	1.0672	0.1037	0.618676
Myo5b	18:74440935-74771493	14.8538	8.25142	-0.84812	0.917574	0.0643	0.526995
mt-Tf	MT:0-68	2282.22	1268.12	-0.847745	0.618326	0.26415	0.796034
Rpl27a-ps1	10:61309829-61310276	1.98211	1.1026	-0.846126	0.573726	0.3203	0.832347
Sdpr	1:51218385-51333779	7.11893	3.96373	-0.844799	1.50298	0.01895	0.3147
Zbtb7c	18:75820177-76148561	2.98597	1.66426	-0.843316	1.7982	0.03415	0.411597
Gm6537	7:28756173-28788665	4.90382	2.73456	-0.842597	0.299955	0.5506	0.930131
Luzp2	7:54835958-55265366	10.4999	5.86549	-0.84006	1.33422	0.03425	0.412003
Cox6c	15:35371545-35938246	92.5781	51.7587	-0.83887	0.682596	0.23035	0.773139
Cnbd2	2:156311846-156375638	2.87456	1.60785	-0.838208	0.395204	0.3992	0.874614
Gm22756	1:151062003-151062110	18.4894	10.3418	-0.838204	3.81161	0.6562	0.956074
Gabrq	X:72825177-72842602	1.90151	1.06514	-0.836098	1.16667	0.17165	0.716689
Fabp7	10:57784880-57788450	6.08556	3.4095	-0.83583	1.19963	0.09115	0.59404
Pacrgl	5:48372391-48388756	2.23985	1.255	-0.835719	0.920595	0.1107	0.63168
K230010J24Rik	15:76001092-76046111	1.89604	1.06247	-0.835565	0.499184	0.30975	0.825711
Dek	13:47084774-47106201	16.7545	9.3899	-0.835363	1.2009	0.02555	0.362352
Zfp37	4:62189539-62208446	6.97112	3.90836	-0.83483	1.25807	0.01675	0.296039
Cenpc1	5:86012042-86065583	2.86659	1.6072	-0.834787	1.53057	0.03455	0.413543
Prkg2	5:98929772-99037351	2.48466	1.39337	-0.834473	0.634894	0.1945	0.741008
Pet100	8:3621550-3625545	6.88939	3.86381	-0.834349	1.21774	0.0495	0.478515
Zfp738	13:67667436-67687071	3.40964	1.91366	-0.833288	1.17157	0.04085	0.443176
Ppp1cb	5:32458973-32687066	22.9826	12.8994	-0.833231	1.03441	0.073	0.551698
Kantr	X:152298499-152327495	11.9884	6.74152	-0.830492	0.98999	0.0618	0.519659
Bloc1s2-ps	2:52425011-52676831	29.5615	16.6271	-0.830182	0.275538	0.63605	0.951386
Cebpb	2:167553313-167690418	8.79201	4.94845	-0.829215	0.240501	0.72185	0.96836
Gm21887	X:170009658-170019281	8.63666	4.86317	-0.828577	0.882767	0.1475	0.687743
Snx25	8:46033260-46195590	18.9318	10.6612	-0.828446	0.670741	0.1895	0.735694
Zfp955a	17:33241518-33255040	3.59754	2.02695	-0.827699	1.11928	0.07745	0.563966
Vbp1	X:75514298-75534942	8.48885	4.78291	-0.827682	1.55803	0.0321	0.399953
Snora7a	6:115805504-115808747	21.0554	11.8661	-0.82735	0.182245	0.71875	0.96787
Mccc2	13:99948532-100015639	5.39208	3.04021	-0.82667	1.303	0.05155	0.485341
Rad17	13:100617164-100666359	2.80842	1.58429	-0.825927	0.501336	0.46555	0.902743
Trbc2	6:41546729-41548352	8.53089	4.81393	-0.825481	0.909843	0.09825	0.608143
Tcp11l1	2:104590522-104712169	4.55406	2.57103	-0.824806	0.672319	0.17185	0.716898
Gm14419	2:177000955-177012787	4.76575	2.69081	-0.824661	0.8079	0.20285	0.748785
Gm8666	X:75459962-75485753	10.7627	6.09207	-0.821041	0.596753	0.2539	0.789952
Itgb1bp1	12:20990458-21286237	10.2795	5.81905	-0.820908	0.51603	0.3655	0.857929
Zfp652os	11:95700105-95845734	5.86951	3.32443	-0.820132	0.182866	0.6691	0.959172
Gm14295	2:176798611-176811223	8.06572	4.5747	-0.818127	0.238354	0.3947	0.872408
Kdm1a	4:136469760-136602723	10.0514	5.70461	-0.817197	0.559663	0.31365	0.828369
Car8	4:8143361-8239041	2.27346	1.29199	-0.815297	1.23114	0.046	0.464904
Chchd1	14:20703026-20704417	20.1899	11.4867	-0.813675	1.1989	0.05375	0.49305
Hmgb1-ps2	X:146175941-146176577	15.3734	8.75272	-0.812633	1.10646	0.04685	0.468313
Gm9531	9:81677597-81678677	116.931	66.5793	-0.812514	1.42606	0.03355	0.408273
Tmem50a	4:134897848-134915024	53.2337	30.3399	-0.811121	1.8432	0.0143	0.273419
Fam188a	2:12347262-12419470	23.5261	13.4119	-0.810748	0.882718	0.12685	0.657559
Gm3150	15:72589620-73061204	58.2075	33.1885	-0.810521	0.164277	0.65955	0.957082
0610040J01Rik	5:63812494-63899619	2.48763	1.41916	-0.809734	1.04047	0.0846	0.58101
Slc25a47	12:108851128-108856814	2.1186	1.20974	-0.808416	0.91581	0.1177	0.643542
Pfdn2	1:171345669-171360798	31.63	18.0742	-0.807358	1.58948	0.0296	0.386709
Rpl21-ps6	17:55915402-55915870	14.4766	8.28019	-0.805986	0.984658	0.1086	0.628492
Clybl	14:122181693-122402232	7.16844	4.10092	-0.805711	1.18568	0.04055	0.441734
Acadsb	7:130162450-133124354	22.6353	12.9496	-0.805662	0.118095	0.30965	0.825634
Fam69a	5:107900501-107987085	9.87128	5.65038	-0.804889	0.672688	0.22955	0.772478
Gm11410	4:80003988-80005131	4.51123	2.58258	-0.804707	1.32154	0.20935	0.755026
Dcbld1	10:52233618-52321378	3.16985	1.81656	-0.803206	1.39583	0.04295	0.451884
Gm3555	1:98421123-98516991	4.96473	2.84563	-0.802968	1.59135	0.0437	0.455136
Acadl	1:66830838-66863277	17.3534	9.95491	-0.801741	1.0711	0.105	0.62125
Bgn	X:73483601-73495933	8.72894	5.00847	-0.801436	0.963965	0.0815	0.573815
Gm22179	6:69516338-69516629	96.51	55.3821	-0.801258	0.898668	0.10705	0.625573
RP23-290N20.2	3:45775423-45775894	6.51263	3.73758	-0.801137	0.796211	0.17515	0.720272
Ccdc50-ps	4:100567107-100568048	5.23075	3.00199	-0.8011	1.12577	0.08125	0.573278
Gm13688	2:80602732-80603340	3.98208	2.2866	-0.800314	0.801212	0.1747	0.719915
mt-Atp6,mt-Atp8,mt-Co3	MT:7765-9390	27594.1	15873.9	-0.797701	0.198132	0.33755	0.842589
mt-Cytb	MT:14144-15288	7622.3	4387.63	-0.796784	0.910278	0.21845	0.762971
Trpc3	3:36620481-36690167	6.03534	3.47517	-0.796353	0.62648	0.1774	0.722889
Dzip1	14:118875519-118925314	9.03571	5.20437	-0.795915	1.45651	0.02165	0.334956
Homez	14:54852735-54870961	7.1783	4.14492	-0.792299	0.754689	0.1739	0.71894
Gm6556	13:15440301-15730026	1.84529	1.06553	-0.792267	0.392219	0.4678	0.903711
Aste1	9:105162155-105527319	3.03047	1.75062	-0.791678	0.415814	0.3328	0.840043
Eif2b3	4:117019401-117087306	6.80539	3.93252	-0.791223	0.699813	0.17805	0.723634
Minpp1	19:32485768-32515370	30.6992	17.7502	-0.790367	1.53939	0.016	0.288964
Nol7	13:43398375-43480973	4.35297	2.51732	-0.790111	0.535621	0.33355	0.84053
Kpna2	11:106988628-106999541	7.50615	4.3416	-0.789846	0.795891	0.1431	0.681508
Lrrc4b	7:44429017-44463351	205.058	118.637	-0.789484	1.21633	0.0341	0.4113
Sox2	3:34650004-34652461	28.3352	16.398	-0.789075	1.54342	0.0157	0.286503
Htatsf1	X:57053582-57067183	17.8632	10.3484	-0.787586	1.43751	0.0194	0.318329
Gm14420	2:177464732-177478129	3.94155	2.28541	-0.786309	0.751048	0.14135	0.678873
Ift43	12:86082560-86162458	2.01792	1.17077	-0.785416	0.964603	0.1464	0.686176
Fra10ac1	19:38188480-38224138	3.84829	2.23448	-0.784277	1.07527	0.09215	0.595848
AW551984	9:39587395-39604403	3.60438	2.09468	-0.783019	0.863336	0.0435	0.454107
Pemt	11:59970613-60046489	5.13855	2.98715	-0.78259	0.707043	0.2034	0.749383
Nxt2	X:142226769-142239692	12.2065	7.11178	-0.77937	1.36976	0.02165	0.334956
Spata24	18:35656689-35662186	4.3412	2.53065	-0.778584	0.880613	0.12405	0.653128
Zfp560	9:20345135-20385177	5.0943	2.97102	-0.777927	0.726079	0.23095	0.773544
Cbr1	16:93607836-93610505	38.9859	22.7392	-0.777771	1.46686	0.01395	0.26994
Cobll1	2:65088338-65239675	2.89691	1.69069	-0.776901	0.846805	0.0332	0.406363
Zfp317	9:19641223-19648048	6.1914	3.61491	-0.776305	1.16405	0.0409	0.443409
Crcp	5:130029289-130060789	15.6805	9.15956	-0.775621	1.37679	0.0254	0.361408
Cfap36	11:29221531-29247409	23.0002	13.4429	-0.774804	1.12862	0.04385	0.455705
Dctn2	10:127266261-127289681	98.0551	57.3401	-0.77405	1.38135	0.0309	0.393715
Wdr46	17:33940659-33949695	3.8986	2.28146	-0.772997	0.891709	0.08985	0.591662
Sh3bgrl3	4:134102569-134128789	719.72	421.216	-0.772876	1.32735	0.0336	0.408455
Gabra5	7:57387271-57510009	15.3131	8.98235	-0.7696	1.4043	0.0209	0.330025
RP23-396I19.1	3:69963281-69963470	56.0698	32.8975	-0.769247	0.678252	0.2192	0.763644
Alg14	3:121291816-121362011	8.80447	5.16741	-0.768794	1.05916	0.06715	0.535343
Fggy	4:95557506-95926939	19.9004	11.684	-0.768261	0.786998	0.1359	0.670995
Lactb2	1:13623329-13660546	3.10301	1.82197	-0.768166	0.62764	0.139	0.675596
Gm15057	X:145990741-145991275	2.81231	1.657	-0.763186	0.600411	0.27865	0.80576
Shh	5:28456814-28933995	1.70468	1.00497	-0.762348	0.896088	0.1547	0.697187
Zfp804a	2:82053221-82259879	5.41827	3.19484	-0.762087	1.40174	0.02315	0.345623
Rbm11	16:75592843-75602829	2.17381	1.28293	-0.760781	0.919754	0.12345	0.6523
Etohi1	2:178023283-178034022	3.36897	1.99005	-0.7595	0.698188	0.1988	0.744932
Pin4	X:102119446-102127669	2.51159	1.48362	-0.759478	0.552439	0.2914	0.813572
Snx9	17:5841327-5931033	2.15367	1.27376	-0.7577	1.04295	0.10745	0.62633
Smek2	11:29170908-29220797	9.52601	5.63466	-0.757543	0.754945	0.1043	0.619795
Lsm12	11:102162496-102185296	14.2755	8.44539	-0.7573	0.765786	0.1337	0.667749
Eapp	12:54670339-54695897	15.7189	9.30304	-0.756722	0.827099	0.1238	0.652697
Fhod3	18:24709444-25467321	8.51266	5.03948	-0.756336	1.12412	0.09175	0.595192
Sec24d	3:123267495-123385990	2.67167	1.58197	-0.756015	0.657883	0.22205	0.766068
Tomm22	15:79670860-79672862	29.5955	17.5325	-0.755341	1.85047	0.02535	0.361055
Nemf	12:69311543-69357176	3.35241	1.98602	-0.755318	1.18194	0.05335	0.491729
Gm5511	19:11438030-11438832	13.3043	7.88563	-0.754596	1.14487	0.0532	0.491306
Gm6159	1:78783135-78784859	9.43343	5.59227	-0.754349	1.3982	0.0365	0.423262
Unc79	12:102948858-103184065	12.1295	7.20062	-0.752325	0.628434	0.0971	0.605986
Rsrc2	5:123728425-123749414	15.5399	9.22902	-0.751724	1.17089	0.03155	0.39727
RP24-445D5.1	3:81000993-81001461	5.25049	3.12371	-0.749194	0.732507	0.21445	0.759513
Gm12430	4:47453631-47454953	11.642	6.9374	-0.746869	1.24483	0.03755	0.427758
Rab2a	4:8535643-8607778	103.193	61.4938	-0.746837	1.44278	0.0158	0.287259
Lhx6	2:36081952-36105408	8.52667	5.08263	-0.746407	0.92368	0.032	0.399361
Gm11805	4:3678114-3813122	2.65757	1.58575	-0.744939	0.313113	0.4969	0.913233
C030017K20Rik	4:155398762-155466823	7.89674	4.71235	-0.744809	1.12803	0.05315	0.491149
Cdon	9:35421127-35507652	2.06521	1.23268	-0.744494	0.683324	0.17065	0.71552
Cd83	13:43785106-43803130	11.1526	6.66247	-0.74325	2.56961	0.02175	0.335528
Sec24b	3:129982758-130061553	31.6426	18.9038	-0.743192	0.724857	0.1474	0.68768
Mthfd1	12:76255231-76319820	3.75084	2.24106	-0.743031	1.30002	0.03935	0.436003
Cars2	8:11497505-11550771	2.08006	1.2435	-0.742223	0.506744	0.41745	0.883424
Mtrf1l	10:5811886-5823910	1.71947	1.02861	-0.741268	0.65035	0.2511	0.787746
Rab13	3:90213694-90226385	1.96191	1.1743	-0.740459	0.835155	0.2034	0.749383
Fndc9	11:46193849-46312859	3.42501	2.05029	-0.740276	0.09166	0.6416	0.952685
Gm25777	16:18239783-18289249	6.94358	4.15692	-0.740163	0	1	1
Tnfrsf1a	6:125349361-125362484	17.5561	10.5126	-0.739847	0.616297	0.2886	0.811953
Gm15351	8:12757013-13020905	2.2427	1.3443	-0.73838	0.0813606	0.6556	0.955981
Gm6335	X:112162553-112163747	12.0599	7.22966	-0.738212	1.30528	0.05405	0.494136
Ctsf	19:4855128-4860912	16.2075	9.72126	-0.737445	1.68756	0.0397	0.437785
Sec61b	4:47474657-47483242	26.9738	16.1874	-0.736683	1.14254	0.05445	0.495701
Epb4.1l2	10:25359797-25523519	11.1251	6.67825	-0.736271	1.35901	0.02715	0.372143
Nts	10:102481759-102490418	4.41905	2.65337	-0.735907	0.834481	0.13725	0.672873
Cutc	19:43689671-43768638	4.81587	2.89254	-0.735459	0.382715	0.55295	0.930747
Upf3b	X:37091677-37110322	7.26162	4.36271	-0.735066	1.26846	0.0411	0.44431
Gm12020	11:18325629-18327671	1.84808	1.1104	-0.73495	0.803122	0.13585	0.670908
Serpinb1a	13:32842091-32851185	4.02509	2.41888	-0.734683	1.04363	0.07725	0.563512
Zfp14	7:30038052-30044734	5.22529	3.14253	-0.733585	1.1236	0.07305	0.551807
Canx	11:50293960-50325673	60.2111	36.2322	-0.732757	0.347981	0.15185	0.694037
Lix1	17:17402671-17459387	10.9236	6.57352	-0.732708	1.30372	0.0319	0.398794
Apbb2	5:66298860-66618828	26.4333	15.9124	-0.732206	0.185784	0.5242	0.922123
Eml2	7:19176420-19206482	69.6937	41.9876	-0.731064	1.37501	0.0373	0.426855
Rhpn1	15:75704279-75714410	2.04302	1.23116	-0.73069	0.969556	0.12395	0.652887
Gm5518	19:29160117-29160765	12.2064	7.35645	-0.730554	0.92381	0.1023	0.616033
Tnnc1	14:31170929-31216946	4.75015	2.86458	-0.72965	0.0736602	0.6184	0.94716
Topors	4:40259600-40279421	8.59783	5.18531	-0.729544	0.849301	0.14465	0.683752
N4bp2l1	5:150571642-150594525	12.9601	7.81979	-0.728876	1.33625	0.03315	0.405951
Osr1	12:9574441-9581499	2.06691	1.24718	-0.728811	1.00644	0.18805	0.733903
Gm13342	2:22227502-22618252	44.3622	26.7696	-0.728733	0.0442368	0.6069	0.94428
Hnmt	2:24002909-24049394	13.0363	7.87086	-0.727944	1.26731	0.0428	0.451236
Zfp637	6:117841179-117845956	42.4091	25.6294	-0.726573	1.41461	0.0264	0.367636
Timm10	2:84826996-84830213	88.7738	53.6519	-0.726506	1.2984	0.0396	0.43733
Rpl21-ps10	3:38107439-38107922	21.629	13.0914	-0.724351	0.946545	0.1235	0.652413
Btbd1	7:81792074-81829431	39.1134	23.6817	-0.723888	1.4572	0.0277	0.375333
Irak1bp1	9:82829539-82847687	10.2667	6.21694	-0.723694	1.14157	0.09555	0.602661
Plch1	3:63696233-63899472	3.5367	2.14195	-0.723475	0.745176	0.11895	0.645509
Gm14480	X:10696931-10697364	6.45734	3.91209	-0.723002	0.733274	0.20215	0.748135
Dok6	18:89301081-89769528	4.09199	2.47914	-0.722966	0.986893	0.08325	0.577732
Rpa3	6:8255935-8259173	3.05075	1.85048	-0.721267	0.614882	0.26	0.793018
Fam118a	15:85037061-85062828	5.0778	3.08164	-0.720505	1.17648	0.05615	0.50102
Nnt	13:119335447-119408997	4.89249	2.96989	-0.720161	1.23411	0.04945	0.47833
Gm7809	17:21962551-22071168	8.60222	5.22331	-0.719744	0.646853	0.24045	0.780415
Mcm3	1:20802967-20820312	1.71933	1.04487	-0.718531	0.487375	0.3051	0.822928
Casc4	2:121866969-121936220	14.6829	8.92978	-0.717443	1.26534	0.0294	0.385705
Gabpa	16:84827865-84863779	4.47285	2.72147	-0.716808	0.33299	0.3426	0.845091
Ccdc148	2:58821696-59160683	3.1639	1.92555	-0.716434	1.46512	0.0539	0.493697
4930506C21Rik	17:8282903-8311080	2.26763	1.38015	-0.716353	0.262219	0.65115	0.95486
Apip	2:103073674-103092644	7.06311	4.30129	-0.715535	0.613616	0.30965	0.825634
2700060E02Rik	14:19751256-19823823	9.24837	5.63383	-0.715083	2.24356	0.06725	0.53567
Sfrp2	3:83766320-83789956	2.09006	1.27358	-0.714653	0.590136	0.22525	0.769042
Tmem168	6:13580686-13608100	8.41314	5.12741	-0.714415	0.367079	0.42715	0.887646
Fbxl21	13:56522471-56537898	2.64062	1.61039	-0.713461	1.06075	0.1257	0.655885
Mrpl3	9:105053238-105079888	30.0408	18.3212	-0.713404	0.894662	0.09915	0.609895
Fam204a	19:60198585-60227678	4.3921	2.67986	-0.712754	1.03885	0.09455	0.600653
AW047730	3:88199101-88204595	32.6831	19.952	-0.71201	1.24382	0.0543	0.495098
Prpf38a	4:108563171-108579336	3.70844	2.26435	-0.711715	0.925297	0.11135	0.632956
Slc16a1	3:104638667-104658462	12.2662	7.49599	-0.710496	1.50182	0.037	0.425394
Crot	5:8966032-8997427	4.74198	2.90062	-0.709127	0.994762	0.0708	0.545887
Tmem141	2:25583017-25631761	17.7027	10.8301	-0.708928	0.314389	0.55245	0.930629
Ctage5	12:59129719-59191583	9.1211	5.58109	-0.708661	0.99525	0.04905	0.476688
RP23-464I9.1	3:155754970-155755240	2.04246	1.24996	-0.70843	0.451757	0.5303	0.924014
Rxfp1	3:79641610-79737880	1.78601	1.09342	-0.707893	0.973731	0.0775	0.564099
Zfp879	11:50832030-50841552	1.69227	1.03611	-0.70778	0.864657	0.18665	0.732718
Ttc32	12:9029996-9036394	1.68722	1.03339	-0.707263	0.529211	0.32355	0.834239
Ndufa5	6:24518665-24528013	81.9223	50.179	-0.707173	0.968488	0.10055	0.612542
Rangrf	11:68968130-68975185	4.69349	2.87555	-0.706823	0.66687	0.3443	0.846042
4931406C07Rik	9:15283336-15312104	6.51545	3.99251	-0.706567	1.07327	0.0702	0.544142
Csde1	3:103020545-103058189	18.1382	11.1149	-0.706538	1.74638	0.0205	0.326936
Ctdsp2	10:126978716-126999975	186.501	114.36	-0.705602	0.116038	0.64805	0.954206
Ppp2r3d	9:124441769-124442748	16.5528	10.1515	-0.705377	0.856505	0.1257	0.655885
Gng2-ps1	4:26501442-26501659	7.06501	4.34044	-0.70285	0.631386	0.4943	0.912569
Ypel1	16:17069695-17111257	12.6244	7.75687	-0.702666	0.492517	0.34295	0.845283
Mettl5	2:69861561-69885615	6.77394	4.16531	-0.701572	0.503216	0.4815	0.908041
Mterf2	10:85119434-85128027	8.11284	4.98958	-0.701288	1.25292	0.06875	0.539967
AA987161	13:67589442-67609707	2.93551	1.8057	-0.701052	0.880825	0.0982	0.608076
Stambpl1	19:34192228-34240333	10.2542	6.31015	-0.700465	0.729214	0.20575	0.751968
Dmkn	7:30763755-30781063	1.94008	1.19496	-0.699157	0.614834	0.4628	0.901779
RP23-243N8.1	3:3939143-3939462	7.72887	4.76313	-0.698346	0.580026	0.25785	0.791904
E430025E21Rik	15:59331997-59374167	7.44672	4.58968	-0.69821	1.37607	0.03855	0.432149
Rnf114	2:167481132-167516173	32.2028	19.8483	-0.698167	1.51594	0.18045	0.72592
Gm7931	5:46414343-46414616	4.19903	2.59255	-0.695683	0.462254	0.42035	0.884434
Gm12565	3:37599423-37600072	9.01143	5.56947	-0.694216	0.946633	0.12685	0.657559
Hspb6	7:30539133-30559838	6.50872	4.02358	-0.693896	0.619455	0.30115	0.819725
Gm7862	12:76120418-76177259	64.868	40.1097	-0.693555	0.822741	0.1505	0.692093
Gm7589	9:59145676-59146210	12.5291	7.77128	-0.689059	0.706417	0.1362	0.6714
Frat2	19:41845977-41848132	2.04989	1.2715	-0.68901	0.751288	0.1599	0.703116
Gm12807	4:110397660-111664324	3.72854	2.31301	-0.688839	0.353153	0.654	0.95561
Gadd45g	13:51846677-51848468	14.0398	8.71295	-0.688288	1.08265	0.07615	0.560856
Zfp935	13:62454322-62466709	1.65323	1.02599	-0.688272	0.730631	0.24705	0.785247
Fam136a	6:86365682-86370057	10.8717	6.75771	-0.685975	1.10388	0.04865	0.475254
Plvap	8:71488102-71511769	12.8607	7.99409	-0.685959	0.728944	0.2299	0.772805
Irf8	8:119910359-124345724	4.1319	2.56873	-0.685747	0.0236333	0.5089	0.917276
Alg13	X:144317811-144374450	2.08187	1.29442	-0.685579	0.527031	0.1986	0.744774
Gm12444	4:46243013-46243890	9.60564	5.97263	-0.685516	1.00662	0.0934	0.598345
Actr6	10:89711972-89732295	3.60743	2.24353	-0.685201	0.971957	0.1312	0.664119
Ccdc74a	16:17646469-17650738	25.4806	15.8508	-0.684845	1.14546	0.0663	0.532749
Gm6736	12:13269126-13583810	14.9429	9.29595	-0.684783	0.585925	0.2967	0.817097
Lrwd1	5:136116630-136136074	4.85553	3.02213	-0.684063	0.570394	0.28825	0.811771
Lss	10:76531587-76562226	8.97415	5.5915	-0.682542	0.603283	0.11225	0.634241
Carf	1:60069784-60153953	1.91141	1.19191	-0.681357	0.387223	0.33745	0.842542
Orc6	8:85299631-85308278	3.70339	2.30976	-0.681103	1.3089	0.10135	0.614303
Ptgr2	12:84285231-84315832	9.71688	6.06375	-0.680283	1.15276	0.0407	0.442554
Morn2	17:80238303-80297473	5.99649	3.7429	-0.679963	0.274407	0.58825	0.939856
Mina	16:59471774-59555752	2.30633	1.43978	-0.679751	0.483159	0.26345	0.795668
Gm11889	4:23517361-23518440	12.0941	7.55639	-0.67853	1.02958	0.0699	0.543218
Gatad2b	3:90341653-90358120	9.4098	5.88219	-0.677811	1.16484	0.0525	0.488888
Vip	10:5639217-5647614	15.9619	9.98753	-0.676432	1.30313	0.05755	0.505655
Gm14584	X:53418330-53418967	14.0417	8.78937	-0.675884	0.928883	0.09795	0.607497
Gm10916	14:50765414-50785518	6.83702	4.28051	-0.675585	0.135796	0.5897	0.940371
Gm13136	4:147735476-147738426	1.96672	1.23189	-0.674916	0.934558	0.09275	0.597117
Tom1	8:75033685-75070121	7.25146	4.54249	-0.67479	1.18961	0.0463	0.465964
Igdcc4	9:65101485-65137940	9.89853	6.20113	-0.674684	1.34817	0.0551	0.497825
Parp2	14:50807945-50821300	2.15528	1.3521	-0.672679	0.834368	0.13965	0.676427
Slc5a5	8:70882888-70892757	15	9.41092	-0.672556	1.39153	0.03425	0.412003
BC022960,Gm15246	X:169320621-169370003	1.8479	1.15967	-0.672171	0.661111	0.21095	0.756637
Gm18889	15:36009478-36140400	3.55388	2.23108	-0.671655	0.848062	0.171	0.716053
Nsmaf	4:6365649-6454271	5.29355	3.32363	-0.671475	0.321466	0.40025	0.875141
Gm23944	7:59583933-59584012	41.8266	26.2712	-0.670935	7.07115	0.70265	0.965155
Hmgcr	13:96648966-96670936	35.656	22.4108	-0.66995	0.725677	0.11265	0.634961
Acat3	17:12911348-12940402	4.803	3.02037	-0.669214	0.264763	0.5501	0.929969
Mterf1a	5:3890580-3893933	1.62367	1.02138	-0.668745	0.712835	0.21375	0.758866
Bbs5	2:69647170-69667571	6.30546	3.96746	-0.668384	0.531294	0.2986	0.818108
Nmi	2:51948486-51973494	2.67561	1.68365	-0.668278	0.543598	0.3182	0.831186
Dusp22	13:30659998-30711231	10.0728	6.34135	-0.667609	0.950514	0.10435	0.619855
Tfdp1	8:13339673-13377702	8.04392	5.07092	-0.665651	1.03822	0.0717	0.548345
Ints8	4:11191350-11254258	2.76557	1.74437	-0.664869	0.723783	0.11785	0.643908
Gm6750	12:116485719-117337022	25.2726	15.9464	-0.664344	0.137036	0.74625	0.971967
Kctd18	1:57955100-58025899	6.88941	4.34719	-0.664297	0.930689	0.1184	0.644504
AA986860	1:130731975-130744622	2.14412	1.35346	-0.663732	0.897197	0.10945	0.629705
4632415L05Rik	3:19894885-19895962	12.2135	7.71309	-0.663092	1.02472	0.0798	0.569866
Snapc5	9:64179296-64182684	13.7975	8.71685	-0.662523	1.0828	0.10385	0.618996
Fmo2	1:162874316-162898726	1.72331	1.08938	-0.661673	0.525341	0.218	0.762621
Mrpl21	19:3260923-3292837	9.13734	5.77775	-0.661267	0.57226	0.33665	0.842124
Gm29397	9:92976225-92976558	3.68556	2.33071	-0.661117	0.452609	0.43135	0.889874
Dnajc10	2:80315465-80354043	18.8881	11.9455	-0.661015	0.649635	0.22275	0.766673
Fkbp3	12:65036332-65073944	52.3744	33.1295	-0.660749	0.973696	0.112	0.633915
Skiv2l2	13:112800893-112927380	8.79887	5.56579	-0.660731	0.978367	0.1248	0.654387
Gm4879	7:13178902-13180174	11.3556	7.18565	-0.66021	1.08833	0.07865	0.567229
Asrgl1	19:9109867-9279175	78.5928	49.7426	-0.659917	0.352379	0.39215	0.870982
Gpc3	X:52272425-52619047	3.38417	2.14299	-0.659173	0.882953	0.15765	0.700754
Ptgs2	1:150100030-150108227	1.8007	1.14072	-0.658618	0.736695	0.12195	0.650476
Zic5	14:122456794-122465677	2.81396	1.78337	-0.657993	0.485433	0.38765	0.868983
Snrpg	6:86371582-86378902	10.7692	6.83094	-0.656757	0.620502	0.26965	0.799912
Pigk	3:152714099-152982246	19.474	12.357	-0.656218	0.172628	0.41025	0.879935
Gm6430	1:97024515-97025928	7.77409	4.93361	-0.656031	1.02432	0.08915	0.590338
Kcnmb4os2	10:116417860-116475319	12.0429	7.64282	-0.656	0.328015	0.66065	0.957396
Dbi	1:120113279-120121078	107.92	68.5389	-0.65497	1.18025	0.0615	0.518458
Gldc	19:30098448-30175418	2.79016	1.77317	-0.65402	1.07691	0.08475	0.581312
Ccdc126	6:49319273-49341582	6.22394	3.95739	-0.653279	1.08563	0.0828	0.576703
Gm28900	1:56451406-56451562	142.353	90.5131	-0.653272	0.628931	0.2292	0.772222
Pam	1:97795113-98095646	59.263	37.6887	-0.653	0.662451	0.2511	0.787747
Dock1	7:134670686-135173639	2.13794	1.35982	-0.652804	0.798507	0.1463	0.686176
Gm21399	8:129252997-129253597	54.2131	34.4835	-0.652735	1.26522	0.05015	0.4804
Gm10155	7:126299433-126299916	25.3433	16.1343	-0.651473	0.919717	0.128	0.659247
Gm6039	X:75172714-75396459	6.72412	4.28116	-0.651346	0.425455	0.42515	0.886828
Coq3	4:21879672-21912162	5.32936	3.394	-0.650976	1.02451	0.0689	0.540382
Bai3	1:25067475-25829707	17.4788	11.132	-0.650896	1.12246	0.047	0.468907
RP24-323H7.4	10:61626933-61628565	2.45515	1.56457	-0.650046	0.822064	0.14415	0.683113
Atg4a-ps	3:103575230-103646023	1.92027	1.22406	-0.649633	0.198589	0.6611	0.957456
Pds5a	5:65615259-65697856	3.53659	2.25463	-0.649468	1.08688	0.06905	0.540796
Zfp853	5:143287754-143292356	5.31654	3.38951	-0.649412	1.65076	0.11005	0.630723
Ppie	4:123105164-123139951	5.89349	3.75806	-0.649133	0.779486	0.1719	0.716922
Npas3	12:53248676-54079392	1.68749	1.07628	-0.648828	1.42547	0.08925	0.59058
Itm2a	X:107397098-107403376	13.9712	8.91363	-0.648365	1.18954	0.0552	0.498137
Unc93b1	19:3935185-3949340	7.44491	4.75029	-0.648237	0.975606	0.11705	0.642363
Hiatl1	13:65064662-65112982	8.46537	5.40179	-0.648134	0.974421	0.12605	0.656306
Gm15989	5:110879802-111289780	2.75305	1.75712	-0.647819	0.162513	0.70895	0.966187
Cnih4	1:181144692-181168994	11.7461	7.50662	-0.64595	1.01558	0.05705	0.503887
Mettl6	14:31478319-31495030	4.30477	2.75108	-0.645938	1.01577	0.091	0.593845
Ralb	1:119470304-119504794	5.73549	3.66665	-0.645454	1.08883	0.07395	0.554147
Slc14a1	18:78100090-78142119	2.90557	1.85801	-0.645068	0.858632	0.14255	0.680628
Exosc3	4:45316612-45379759	5.94627	3.80389	-0.644512	0.396439	0.53485	0.925396
Rpp30	19:36083715-36104772	4.06963	2.60414	-0.644091	0.824367	0.1509	0.692668
Plekhf2	4:10988661-11007927	4.11664	2.63433	-0.644032	0.552761	0.36125	0.855404
Dph7	2:24962399-24972163	17.7467	11.3601	-0.643571	0.48569	0.3042	0.82222
Gm6104	1:4807787-4897909	23.0069	14.7312	-0.643197	0.358197	0.5011	0.914647
Arv1	8:124722138-124734123	2.2315	1.42981	-0.642195	0.712705	0.2127	0.758077
Arpc5	1:152766541-152775597	57.8571	37.078	-0.64193	1.30358	0.0392	0.43513
Gm14539	X:20581140-20581314	661.627	424.039	-0.641822	0.875037	0.12715	0.657943
Ttc23	7:67647409-67726576	2.1671	1.3899	-0.640783	0.532879	0.23095	0.773544
Gm6563	19:23675843-23676712	22.6299	14.5147	-0.640719	1.04532	0.0667	0.534005
Gpc4	X:52053020-52165252	2.3482	1.50636	-0.640489	1.15314	0.1135	0.636566
Kdm4c	4:74242496-74405860	3.44112	2.20882	-0.639602	0.730378	0.0829	0.577001
Fam183b	11:58792796-58801960	2.96378	1.9027	-0.639391	0.527216	0.35805	0.853707
Zdhhc18	4:133605298-133650154	24.8018	15.9228	-0.639352	0.381449	0.4685	0.903939
Rbm19	5:120116509-120197979	2.02147	1.29806	-0.639049	0.919864	0.12765	0.658801
Sox3	X:60891365-60893430	1.81473	1.16624	-0.63789	0.710974	0.22045	0.76476
Morc2a	11:3639784-3690477	8.18261	5.25875	-0.637841	0.437642	0.26135	0.794029
Smarcd2	11:106263178-106272972	7.22501	4.64436	-0.63752	0.697567	0.19345	0.739844
Krtcap2	3:89234176-89249906	6.85076	4.4044	-0.637319	0.190006	0.6257	0.948906
Tmem5	10:122078113-122097371	9.39604	6.04281	-0.636833	0.857529	0.1166	0.64166
Agrp	8:105566323-105682922	4.34691	2.79624	-0.6365	0.10782	0.5966	0.941947
Gm13368	2:15481911-15482341	2.35501	1.51588	-0.635574	0.455916	0.4156	0.882517
Rasal1	5:120648811-120679597	42.6594	27.4615	-0.635454	0.527816	0.3648	0.857566
Acat2	17:12942889-12960747	8.73567	5.62503	-0.635057	2.33003	0.0581	0.507496
Gm25014	8:13255962-13322924	5.81854	3.7472	-0.634845	0	1	1
Kansl2	15:98518820-98534244	9.07829	5.84739	-0.634628	1.27825	0.0736	0.553405
Zscan29	2:121158272-121271407	2.95255	1.90198	-0.63446	0.277263	0.5646	0.934015
Akap9	5:3928053-4080209	12.504	8.05516	-0.634405	0.450831	0.24815	0.786006
Psma4	9:54950229-54958030	30.9056	19.9203	-0.63363	1.07832	0.0578	0.506288
Eea1	10:95940662-96045518	5.01752	3.2343	-0.633524	1.21648	0.0454	0.462641
Hsd17b12	2:94032688-94157964	25.686	16.565	-0.632846	1.05857	0.0599	0.513483
Tbck	3:132684143-132838506	1.96459	1.26795	-0.63173	0.902089	0.125	0.654597
Rftn2	1:55170158-55235622	10.3203	6.66312	-0.631217	0.916512	0.09655	0.604833
Ppih	4:119300009-119320546	2.49438	1.61054	-0.631139	0.622874	0.24215	0.78165
Gm4217	15:84866316-84867318	5.11959	3.30732	-0.630366	0.805752	0.15795	0.701076
Zfp780b	7:27962707-27975368	1.83811	1.18832	-0.629301	0.807531	0.15525	0.697818
Gm22909	7:59520283-59520362	40.4118	26.1422	-0.628394	6.53484	0.70265	0.965155
Gm25523	7:59509067-59509146	40.4118	26.1422	-0.628394	6.53484	0.70265	0.965155
Gm22511	7:59471903-59471982	40.4118	26.1422	-0.628394	6.53484	0.70265	0.965155
Ctsc	7:88278084-88310888	3.70614	2.39764	-0.628301	0.665498	0.1933	0.739688
Gm6161	1:9547947-9631175	7.89936	5.11364	-0.627386	0.171803	0.7241	0.968703
Zfp90	8:106210935-106425889	7.25041	4.69513	-0.626897	0.365653	0.62525	0.948859
Galnt11	5:25222847-25265918	9.0721	5.87716	-0.626317	1.26552	0.05335	0.491729
Lpcat2	8:92855349-92919279	3.36117	2.17813	-0.625876	0.502586	0.36185	0.855868
Pdk4	6:5483350-5496309	6.40459	4.15244	-0.625145	0.382524	0.45725	0.899678
Gm10313	8:46254676-46255678	2.66978	1.73111	-0.625021	0.688987	0.21975	0.764017
Sec13	6:113728066-113740743	22.2524	14.4287	-0.625019	1.10005	0.06965	0.542451
Gm7729	18:27598643-27599756	24.7295	16.0449	-0.624118	1.06576	0.07405	0.554528
Senp5	16:31962505-32003287	12.2098	7.93445	-0.621839	1.00824	0.0884	0.588793
Tek	4:94739288-94874976	2.8547	1.85519	-0.621773	0.65312	0.1725	0.717385
2810001G20Rik	11:64079483-64083259	6.84725	4.45236	-0.620955	0.914976	0.13195	0.665331
Sept7	9:25252438-25308571	37.5716	24.4318	-0.62088	1.39534	0.0449	0.460378
Alyref	11:120592120-120598365	11.0218	7.1684	-0.62063	0.762815	0.3067	0.823981
Rai14	15:10568978-10714631	2.75714	1.79339	-0.620482	1.06383	0.07365	0.553501
Gm14026	2:129158665-129180667	23.6277	15.3735	-0.620037	1.208	0.0493	0.477685
Lap3	5:45493373-45512674	19.2287	12.5142	-0.619694	1.07614	0.0568	0.503182
Trim59	3:69035287-69044755	8.07773	5.25912	-0.619129	0.872373	0.09465	0.60093
Snord83b	15:80077793-80119501	41.3503	26.9245	-0.618977	0.126111	0.75275	0.972916
Eva1a	6:82041042-82093099	9.91621	6.45746	-0.61882	1.14516	0.0645	0.527752
P4ha1	10:59323295-59373304	9.41188	6.1296	-0.618689	1.08986	0.06565	0.530856
Tceb3	4:136003367-136021763	5.78347	3.7666	-0.618671	1.2845	0.06085	0.516671
Fut8	12:77238103-77476338	13.6315	8.87825	-0.6186	1.18677	0.05015	0.4804
Gm11349	13:25582270-25583386	5.36502	3.49459	-0.61846	0.762578	0.15745	0.700575
Chmp5	4:40948406-40965303	15.5238	10.1163	-0.617797	1.95684	0.063	0.523571
Zkscan4	13:21478906-21485507	3.15591	2.05677	-0.617672	1.02458	0.13905	0.675628
Zfp786	6:47819265-47830867	2.52305	1.64435	-0.617652	0.890747	0.1037	0.618676
C030039L03Rik	7:27689339-27706484	2.70031	1.7602	-0.617386	0.769158	0.10245	0.616259
Gm1862	X:53883610-53884420	5.81808	3.79255	-0.617375	0.794045	0.177	0.722467
Lrrc27	7:139103637-139242979	4.92384	3.20998	-0.617221	0.245753	0.5651	0.934173
Spcs2-ps	2:129378270-129379396	8.72409	5.68972	-0.616649	1.12947	0.12545	0.655388
Cyp7b1	3:18071949-18243338	2.98024	1.94411	-0.616319	0.86686	0.13815	0.674146
Eif3a	19:60761115-60790693	21.6384	14.1198	-0.615879	1.20937	0.04185	0.447666
Sfxn5	6:85213050-85333422	40.4329	26.3854	-0.615792	1.13621	0.03695	0.425134
Spag6	16:16753015-16829456	2.24895	1.46875	-0.614662	0.0969077	0.48485	0.909597
Gm8349	3:61461858-61462861	10.4083	6.79924	-0.614287	0.944694	0.1024	0.616237
Cic	7:25267703-25294159	69.2015	45.2331	-0.613425	0.554868	0.2109	0.756582
Zfp131	13:119765186-119790805	8.73617	5.71068	-0.613338	1.15299	0.06475	0.528301
Suco	1:161816113-161876682	17.487	11.431	-0.613321	0.345379	0.6304	0.950007
Gm12727	4:106088713-106105068	5.77642	3.77638	-0.613174	0.554005	0.3284	0.837216
Rybp	6:100228565-100287441	8.74199	5.71565	-0.613043	1.14562	0.06225	0.521103
1190007I07Rik	10:82619850-82623228	8.0402	5.25906	-0.612427	0.579998	0.23465	0.776281
Psmb3	11:97703398-97713500	35.4935	23.2273	-0.611731	1.22714	0.06175	0.519402
Cntn4	6:105677659-106699310	12.1502	7.95197	-0.611597	0.489903	0.3297	0.838065
Ggta1	2:35400178-35463231	2.70198	1.76979	-0.61044	0.770055	0.101	0.613758
Grik1	16:87896195-88056176	3.00476	1.96857	-0.610101	0.86741	0.14005	0.676992
Dhdh	7:45472955-45526268	2.91802	1.9124	-0.60961	0.43075	0.4883	0.91084
Snx4	16:33251455-33299562	8.9603	5.8729	-0.609474	1.08698	0.06645	0.533103
Thumpd3	6:113046224-113077333	7.67117	5.02952	-0.609026	0.618136	0.171	0.716053
Gtf2h3	5:124579139-124597680	8.69089	5.70004	-0.608531	0.66932	0.2638	0.795874
Chchd7	4:3938887-3951046	13.7644	9.032	-0.607827	0.639378	0.17825	0.723796
Unc50	1:37430138-37439124	35.1376	23.0664	-0.607223	0.71497	0.20455	0.750622
Zbtb44	9:31030643-31075879	2.14216	1.40637	-0.607088	0.908393	0.2059	0.752155
Tmem117	15:94629184-95096097	2.03315	1.33521	-0.606651	0.927076	0.16535	0.709747
Gm18588	3:68892498-69004570	19.5946	12.8717	-0.606255	0.381381	0.46755	0.903645
Gm8587	12:88089115-88089976	2.21911	1.45803	-0.605963	0.725858	0.38835	0.869438
Exoc6	19:37550417-37683245	3.42762	2.2521	-0.605935	0.984328	0.0855	0.582692
Lsm10	4:126096622-126098584	18.847	12.3837	-0.605892	0.781455	0.173	0.718038
Tiprl	1:165212285-165236996	41.5112	27.2772	-0.605806	0.463126	0.45635	0.899401
Hsdl2	4:59581562-59618689	7.37748	4.84955	-0.605277	0.864554	0.09105	0.593845
Irs4	X:141710997-141726163	2.10571	1.38446	-0.604983	0.752763	0.15775	0.700915
Plek	11:16971205-17079371	2.72066	1.78885	-0.604929	0.39246	0.5277	0.923268
Zfp955b	17:33289648-33303196	5.57636	3.66797	-0.604341	1.00049	0.10685	0.625101
Chac2	11:30954394-31102704	4.72658	3.10902	-0.604338	0.548025	0.3396	0.843542
Gm15528	13:75869536-75943925	3.38578	2.22718	-0.60427	0.34322	0.5282	0.923434
Zfp85	13:67729261-67756838	1.88317	1.23902	-0.603964	0.638519	0.39165	0.870688
Wdr1	5:38526813-38561666	34.8196	22.9112	-0.603843	1.0984	0.05155	0.485341
Eps15	4:109280267-109387817	33.4965	22.042	-0.603752	0.923261	0.07795	0.565431
Rab40b	11:121356124-121388251	22.0408	14.5043	-0.603696	0.591228	0.2119	0.757406
Pspc1	14:56722440-56778316	9.42838	6.20565	-0.603428	1.2056	0.05915	0.510802
Gm10039	11:100361715-100362126	275.149	181.107	-0.60337	1.19714	0.04565	0.46368
Wdr41	13:94976343-95023314	10.0008	6.58385	-0.603118	1.13049	0.0563	0.501722
Rhpn2	7:35334169-35396817	2.84785	1.87651	-0.601816	0.564593	0.27175	0.801243
Snap23	2:120567670-120601255	2.87267	1.89294	-0.601764	0.390572	0.3471	0.847736
Slc25a11	11:70644195-70651421	48.0082	31.6387	-0.601593	0.796929	0.12825	0.659532
Iqgap2	13:95627176-95891922	1.91601	1.26278	-0.601506	0.92447	0.11845	0.644579
2210008F06Rik	11:77489853-77491409	3.28051	2.16218	-0.601433	0.680089	0.22395	0.767953
Slc40a1	1:45908067-45926523	4.32821	2.85355	-0.601015	0.386222	0.33725	0.842427
Dctd	8:48099091-48153233	2.7778	1.83157	-0.600865	0.609389	0.18815	0.733945
S100a16	3:90537253-90543151	98.2913	64.8268	-0.600474	0.955656	0.16125	0.705018
Stard5	7:83631958-83745726	3.38784	2.23471	-0.600281	0.410275	0.3262	0.835838
Tac1	6:7554878-7565834	57.7574	38.1066	-0.599965	0.993437	0.07085	0.545978
Gm9115	X:102724401-102725749	3.49529	2.30685	-0.599489	0.782603	0.18765	0.733422
Klc3	7:19382009-19404104	2.41743	1.59606	-0.59896	0.316241	0.6724	0.959952
Atp5l-ps1	7:62476305-62476617	61.9679	40.9265	-0.598484	0.840068	0.144	0.682827
Scoc	8:83434492-83458391	35.07	23.1625	-0.598442	1.60168	0.0541	0.494314
Ankrd26	6:118501307-118562226	3.76539	2.48748	-0.598113	0.472369	0.3628	0.856354
Asns	6:7675168-7693254	46.4945	30.7151	-0.598113	0.589314	0.22445	0.768232
Gm16053	7:97400002-97407802	1.90279	1.25762	-0.597418	0.108244	0.57205	0.935768
Pbrm1	14:31019137-31128930	6.40743	4.23522	-0.597308	0.760532	0.0716	0.548075
Ctnnd2	15:30172592-31029311	22.8682	15.1164	-0.597231	1.24965	0.052	0.487153
Taf15	11:83473085-83506743	6.21999	4.11219	-0.597004	0.899362	0.12785	0.65903
Stk17b	1:53755505-53785224	2.03427	1.34517	-0.596728	0.704012	0.15085	0.692609
Gabra2	5:70961056-71095849	6.61395	4.37408	-0.596531	1.04387	0.0853	0.582308
Utp18	11:93859242-93885766	1.85725	1.22832	-0.596485	0.689112	0.1828	0.728423
Stmn3	2:181306458-181314500	274.615	181.622	-0.596472	1.10176	0.0482	0.473676
Cstf3	2:104590522-104712169	7.7136	5.10196	-0.596354	0.436967	0.42175	0.885151
Prr5l	2:101714284-101883256	7.24233	4.79055	-0.596263	0.454035	0.2472	0.785355
Ccdc112	18:46282150-46311928	2.58203	1.70843	-0.595832	0.831875	0.138	0.673909
Gm5582	6:131253527-131254049	6.60813	4.37275	-0.5957	0.788774	0.22795	0.771386
Mkks	2:136873779-137071950	11.5894	7.66927	-0.595642	0.573258	0.3057	0.823241
Rpf1	3:146506347-146521423	2.99294	1.98084	-0.595449	0.722464	0.24505	0.783715
Fbxo9	9:78081498-78109065	70.4418	46.6229	-0.595394	0.838853	0.14665	0.686519
Nkx2-2	2:147177545-147331681	4.75672	3.14845	-0.595324	0.714918	0.2119	0.757406
Slc39a6	18:24579880-24603817	15.9127	10.5334	-0.595212	0.652346	0.1436	0.682267
Gm5819	18:8694076-8694541	9.12221	6.04068	-0.594673	0.653858	0.2306	0.773303
Scarb2	5:92443872-92505608	13.5938	9.00413	-0.594293	1.67153	0.0628	0.5229
Furin	7:80388584-80405436	17.408	11.5351	-0.593719	0.362133	0.43625	0.891794
Pi4kb	3:94974730-95015448	37.3843	24.7944	-0.592415	0.466934	0.3867	0.868499
Becn1	11:101277967-101302286	147.237	97.6533	-0.5924	0.323297	0.5696	0.935179
Gm5801	14:56010535-56011315	23.8553	15.8247	-0.592129	0.915559	0.1109	0.632105
Gm7887	6:48524371-48525105	45.0211	29.8669	-0.592054	1.01718	0.0654	0.530158
3110043O21Rik	4:35191284-35262222	6.97645	4.62883	-0.591845	0.361615	0.49	0.911316
Gm6254	14:122107037-122159604	5.80589	3.85356	-0.591327	0.3272	0.5981	0.942339
Tcf3	10:80409513-80433647	14.3343	9.51641	-0.590982	0.945601	0.14695	0.687026
Rrp15	1:186720977-186749358	4.00126	2.65668	-0.59083	0.777589	0.26785	0.798826
2610008E11Rik	10:79064373-79097600	4.31843	2.8686	-0.59016	1.00593	0.09165	0.595117
Cep162	9:87189576-87255536	2.04319	1.35732	-0.590058	0.435093	0.36575	0.858154
Gm9835	6:4893351-4893777	2.31709	1.53936	-0.589984	0.442333	0.4203	0.884434
Rpl7	1:16101294-16104662	114.44	76.0282	-0.58998	0.889663	0.1311	0.664036
Ypel3	7:126776954-126780514	136.057	90.4118	-0.589628	1.22195	0.05565	0.499344
Eif2ak4	2:118388617-118475234	3.83464	2.54913	-0.589083	0.93414	0.1349	0.669686
Atox1	11:55446640-55461239	10.2338	6.80372	-0.588947	0.621164	0.29995	0.819013
Fdps	3:89093591-89101967	19.6821	13.09	-0.588417	1.11192	0.0904	0.592926
Gtf2h1	7:46796102-46823800	12.3335	8.20557	-0.587902	0.714575	0.17085	0.715867
Poc1b	10:99107035-99198074	4.66593	3.1073	-0.586503	0.402368	0.47085	0.904608
Gm13205	4:148804428-148954889	12.9302	8.61469	-0.585878	0.614211	0.2616	0.7942
Omg	11:79339692-79581612	57.5569	38.3571	-0.585494	0.777315	0.18655	0.73268
Pxmp4	2:154585757-154603708	6.82799	4.55189	-0.584996	0.765244	0.13755	0.673246
Gm7114	1:33100906-33102695	12.4928	8.32866	-0.584939	1.04393	0.07675	0.562485
Gm25463	7:59412801-59412880	60.6177	40.4166	-0.58479	5.40063	0.69655	0.964114
Gm4202	3:92689425-92690158	418.408	279.167	-0.583783	1.01377	0.0688	0.540086
Acyp1	12:85272397-85288438	10.1745	6.7891	-0.58367	0.764241	0.2079	0.754028
Kif21a	15:90933275-91049948	20.508	13.6848	-0.583617	1.17748	0.0648	0.528489
Dnm1l	16:16312234-16359030	35.0588	23.3949	-0.583582	1.23645	0.055	0.4975
Ube2q1	3:89773608-89783997	15.5452	10.3742	-0.583468	1.13793	0.04915	0.477174
Gm9104	17:45448936-45474938	15.443	10.3085	-0.58311	0.70614	0.2417	0.781444
Atp5j	16:84827865-84863779	150.491	100.47	-0.582912	0.894141	0.1557	0.698215
Zfp691	4:119169512-119174195	7.50375	5.01036	-0.582699	0.436788	0.5097	0.917591
Zfp626	7:27810812-27818669	2.32269	1.55097	-0.582621	0.552385	0.32615	0.835836
Tsg101	7:46888948-46919969	14.3494	9.58451	-0.582216	0.871423	0.12525	0.655032
Gm11488	4:73497614-73498477	12.7114	8.49117	-0.582088	0.898049	0.11765	0.643448
Dnajc9	14:20384637-20388910	9.45487	6.31612	-0.582019	1.07741	0.07315	0.552026
Gng5	3:146499833-146505572	8.49077	5.6725	-0.581909	0.653964	0.25465	0.790394
Cdc40	10:40831625-40883143	7.18963	4.80597	-0.581089	1.03247	0.0785	0.566872
Txndc9	1:37985188-37997893	15.5339	10.3909	-0.580104	0.857956	0.13375	0.667874
Coro2a	4:46489247-46602202	9.32492	6.2422	-0.579037	0.902145	0.1126	0.634881
Naa30	14:49172225-49191031	5.33061	3.56925	-0.578681	0.731815	0.2338	0.775638
Hmbs	9:44336349-44344228	4.22571	2.83011	-0.578337	0.804206	0.15695	0.699922
Celrr	1:121087404-121178441	1.5757	1.05547	-0.578101	0.580544	0.3155	0.829408
Fhit	14:9550091-11162035	2.23494	1.49711	-0.578058	0.459215	0.29135	0.813536
Pnrc2	4:135870917-135873850	41.7901	28.0264	-0.576374	0.240111	0.4797	0.907455
Pdpn	4:143267430-143299564	2.97715	1.9971	-0.576026	0.870026	0.14795	0.688239
Tmem255a	X:38189792-38252439	11.0311	7.40424	-0.575148	0.708339	0.2269	0.770455
1810062O18Rik	14:20499363-20618354	1.59166	1.06839	-0.575084	0.0536493	0.6622	0.957841
Gpc6	14:116925296-117979529	2.03503	1.36604	-0.575053	0.77413	0.19785	0.744043
Rpusd3	6:113415318-113419348	5.98666	4.01927	-0.574815	0.580763	0.3079	0.824674
Hist1h1c	13:23738807-23740367	19.0933	12.8289	-0.573665	1.02099	0.08305	0.577258
Atp5l-ps2	11:86058137-86201193	8.46162	5.68632	-0.57344	0.41273	0.45255	0.898057
Golga4	9:118506317-118582522	10.9227	7.34248	-0.572988	1.06407	0.05915	0.510802
Gm11772	11:120232946-120292296	3.01183	2.02501	-0.572712	0.151965	0.81845	0.981517
Cntn3	6:102163305-102464667	2.03536	1.36899	-0.572167	0.894321	0.12315	0.651954
Ppp1r3e	14:54872668-54879682	11.3738	7.6511	-0.571978	0.801253	0.161	0.704594
Gm17251	17:33742483-33761870	3.24891	2.18648	-0.571349	0.146203	0.7959	0.978491
Gm12700	4:100581277-100581734	2.05593	1.38362	-0.571341	0.409169	0.4598	0.900699
Filip1	9:79815050-79977804	6.87596	4.62959	-0.570674	0.677523	0.15465	0.697139
Cep89	7:35397034-35438689	7.24792	4.8819	-0.570124	0.48299	0.42305	0.885839
Phax	18:56509686-56587712	37.6857	25.3843	-0.570079	0.725172	0.29125	0.813507
Usp32	11:84984441-85140161	47.4926	32.0017	-0.569556	0.498107	0.3516	0.850146
Supt6	11:78206745-78255496	24.9927	16.8421	-0.569441	1.15784	0.1254	0.655329
Deb1	9:121710388-121712921	25.256	17.0195	-0.569432	0.843847	0.15465	0.697139
Gm14122	2:150398255-150399399	1.53873	1.03709	-0.569195	0.556906	0.34255	0.845091
Gm13503	2:53551925-53552371	1.93092	1.30212	-0.568427	0.471438	0.4594	0.900524
Esco1	18:10566601-10610352	2.94836	1.99026	-0.566956	0.900691	0.11045	0.631374
Brcc3	X:75416627-75454001	3.80092	2.5658	-0.566938	0.585558	0.2248	0.768527
Ppib	9:66060168-66069731	47.387	32.0069	-0.566111	0.915099	0.13065	0.663253
Gm15706	6:145250528-145251849	3.52453	2.38148	-0.565577	0.803329	0.25395	0.789952
Gm22009	3:69067148-69127113	70.8129	47.8495	-0.565509	0.254193	0.70575	0.965686
Amz1	5:140724126-140830431	12.8829	8.70789	-0.565057	0.280445	0.44735	0.896164
Gm10045	17:29308137-29308620	42.3144	28.6173	-0.564262	0.922087	0.09935	0.610199
Colec12	18:9707647-9877995	3.0565	2.06804	-0.563614	0.879519	0.12675	0.657425
AK129341	9:8076632-8134294	2.92327	1.97821	-0.56339	0.880591	0.1228	0.651508
Clip2	5:134489385-134552434	54.4562	36.8607	-0.563011	1.17638	0.0605	0.515626
Gm8459	6:122553800-122570849	4.06098	2.74894	-0.562951	0.57708	0.2816	0.807405
Gtf2a2	9:70012549-70022866	9.34683	6.32932	-0.562427	0.670254	0.26375	0.795845
Sumo2	11:115523101-115536276	24.643	16.6906	-0.562145	0.947164	0.10765	0.626856
Taf12	4:132274374-132295766	3.04452	2.06225	-0.561995	0.628926	0.2245	0.768255
Ppp4r1l-ps	2:173579319-173659640	4.50729	3.05308	-0.561994	0.692751	0.1067	0.624743
Gm9387	3:128953781-128955098	9.09738	6.16615	-0.56108	0.828364	0.1197	0.646875
Arhgef4	1:34678187-34843065	108.855	73.7889	-0.560935	0.565336	0.2922	0.81405
Lyz2	10:117277333-117282274	11.5303	7.81726	-0.560696	0.905028	0.09965	0.610853
Antxr1	6:87133853-87335775	4.01618	2.72311	-0.560572	0.965756	0.08355	0.578543
Gm7658	1:21398402-21962530	45.7973	31.0545	-0.56046	0.691069	0.33655	0.842072
Il2	3:37063526-37125959	4.38373	2.97285	-0.560315	0.577176	0.38445	0.867655
Gm16001	5:124111108-124112241	5.7592	3.90725	-0.559714	0.757495	0.1967	0.743017
Appl2	10:83600032-83648738	25.8464	17.5418	-0.559168	0.731339	0.1562	0.698818
Cav2	6:17197750-17385604	16.719	11.348	-0.559053	0.687031	0.25465	0.790394
Pdcd5	7:35641981-35647521	7.75459	5.26452	-0.558748	0.684996	0.30325	0.821487
Nog	11:89300637-89302332	5.81078	3.94527	-0.558606	0.824682	0.15775	0.700915
Ppp4r4	12:103532282-103613831	5.38474	3.65615	-0.558554	0.583762	0.1458	0.685536
AI504432	3:106934381-107098401	4.30725	2.92569	-0.55799	0.805743	0.26605	0.797517
Ddx25	9:35541846-35558528	7.97098	5.41787	-0.557031	1.43057	0.0898	0.591573
D7Ertd443e	7:134266261-134385661	2.89276	1.96628	-0.556979	0.329756	0.4649	0.902492
Rlim	X:103957162-103981284	4.55338	3.09531	-0.556856	1.59119	0.07905	0.568179
BC006965	11:112663926-112781976	1.64002	1.11512	-0.556518	0.387266	0.24885	0.786354
Gm12141	11:41498736-41500458	37.1561	25.2792	-0.55565	1.06002	0.077	0.562922
Tsr3	17:25240169-25256364	13.061	8.88682	-0.555527	0.288622	0.5537	0.930887
Ikzf5	7:130162450-133124354	6.21473	4.22923	-0.555295	0.0768325	0.62395	0.948541
Cbwd1	19:24919915-24961616	3.17732	2.16229	-0.555253	0.782167	0.16935	0.714095
Taf1	X:101532733-101601789	8.46332	5.75991	-0.555176	0.801755	0.13385	0.668087
Npy	6:49822709-49829507	62.4953	42.5366	-0.555044	0.89133	0.09175	0.595192
Gm14292	2:179177424-179177880	26.6007	18.1109	-0.554608	0.822507	0.1337	0.667749
Elovl2	13:41182494-41220405	4.6182	3.14482	-0.554355	0.943841	0.0895	0.590955
Lrrc16b	14:55491092-55508246	2.53047	1.72335	-0.55419	0.936514	0.1137	0.636921
Gm5937	X:77456585-77457228	2.43558	1.65967	-0.553365	0.526424	0.36015	0.854755
Herpud2	9:25108129-25151781	10.7041	7.2944	-0.553305	1.15718	0.09275	0.597117
Supt20	3:54692822-54735393	5.4375	3.70581	-0.553155	0.64277	0.2512	0.787848
Dnajc28	16:91611467-91646952	5.65493	3.85422	-0.553068	0.402426	0.40725	0.878357
Cd68	11:69664212-69666153	6.85465	4.67194	-0.553061	0.839658	0.17375	0.718734
Ywhaz	15:36770769-36794547	166.751	113.66	-0.552978	0.248146	0.26025	0.793079
Rasgef1c	11:49901834-49980994	13.5011	9.20554	-0.552499	1.06216	0.08685	0.585659
Chd2	7:73426690-73558395	11.7387	8.00567	-0.552174	0.366914	0.31325	0.828099
Gm13422	2:23207475-23267129	24.1135	16.4494	-0.551808	0.830699	0.14935	0.690485
Zfp941	7:140807448-140822178	9.14494	6.2393	-0.551589	0.553776	0.1399	0.676767
Prmt3	7:49778345-49858265	7.36745	5.02844	-0.551054	0.650271	0.19115	0.737343
Zfp605	5:110110091-110129794	4.48958	3.06443	-0.550961	0.611707	0.2424	0.781822
Gm20748	18:61639541-61647472	1.54714	1.05628	-0.550613	0.348017	0.45105	0.897651
Kif5a	10:127225695-127263363	405.912	277.129	-0.550613	0.725924	0.2536	0.78966
Rpl21-ps15	X:151198077-151471842	48.7047	33.2805	-0.549383	0.387895	0.44055	0.893536
Zfp28	7:6383317-6396633	2.34421	1.60249	-0.548787	0.822309	0.13305	0.666862
Fam184a	10:53633144-53750909	8.68553	5.94043	-0.548045	0.7027	0.19565	0.74181
Dvl3	16:20511132-20532520	9.71611	6.64532	-0.548039	1.14279	0.12425	0.653443
Ift57	16:49699232-49798870	7.80108	5.33602	-0.547911	0.706147	0.2164	0.761197
Hnrnpa1	15:103240431-103244955	12.2141	8.35925	-0.547106	0.925871	0.1009	0.613461
Kin	2:10080592-10092806	7.49999	5.13443	-0.546685	0.717529	0.20165	0.747659
Atf7,Gm28047,Npff	15:102523838-102625464	11.3415	7.7667	-0.546244	0.481856	0.3781	0.864368
Zfp825	13:74480516-74482943	1.98035	1.35638	-0.545998	0.634162	0.3795	0.865228
Zfp931	2:178067694-178078476	3.90574	2.67551	-0.545782	0.63154	0.25	0.787296
Atp5o,Donson	16:91647505-91962915	66.4866	45.5484	-0.545663	0.183889	0.67075	0.959519
Gm8577	X:154774452-154775438	3.792	2.59794	-0.545592	0.618861	0.26205	0.794569
Gm13142	4:146153455-147492201	2.71353	1.85948	-0.545272	0.299438	0.61125	0.945337
Zfp382	7:30121941-30134665	4.32277	2.96223	-0.545271	0.677184	0.1807	0.726264
Nalcn	14:123276640-123627144	7.55319	5.17614	-0.545209	1.21205	0.0803	0.571062
Aebp2	6:140622448-140678472	12.6479	8.6692	-0.544932	0.798314	0.14985	0.691057
Mrpl20	4:155802877-155809975	42.9332	29.4443	-0.544107	0.891993	0.1477	0.687935
Insig1	5:28071362-28078662	24.7418	16.9732	-0.543691	1.5111	0.0758	0.559771
Eif2b1	5:124570212-124579131	7.83321	5.37504	-0.543327	0.987853	0.08825	0.588488
Ccl25	8:4325209-4360020	3.00642	2.06395	-0.542637	0.581992	0.28185	0.807507
C1ql3	2:13003456-13012486	34.6218	23.7732	-0.542344	1.02578	0.0806	0.571516
Marcksl1	4:129513580-129515985	39.3441	27.026	-0.541798	1.01573	0.076	0.560382
4930430F08Rik	10:100488288-100589259	3.65606	2.51234	-0.54126	0.608673	0.2787	0.80578
Rasd1	11:59963180-59964944	14.1863	9.75057	-0.540941	0.904551	0.1112	0.632663
Ppp1r2-ps4	9:66805305-66805938	33.9238	23.3172	-0.5409	0.953789	0.12335	0.652216
Cdh9	15:16778100-16857094	4.20532	2.89076	-0.540768	0.844422	0.1374	0.673131
Ten1	11:116171887-116215318	24.325	16.7227	-0.540634	0.237546	0.73855	0.970781
Sfxn1	13:54071844-54108346	10.6918	7.35086	-0.540516	1.37586	0.07685	0.562642
Gm10605	7:99624081-99631711	1.66881	1.14753	-0.540292	0.285555	0.6122	0.945562
Dhdds	4:133969027-134000918	21.355	14.6863	-0.540103	0.72371	0.1822	0.727868
Hsf2	10:57486384-57513133	4.726	3.25027	-0.540057	0.942829	0.13455	0.669134
Scrg1	8:57455922-57477585	10.4465	7.18555	-0.539854	0.809818	0.1753	0.720436
Dars	1:128363706-128417368	6.21872	4.27814	-0.539636	0.771842	0.16515	0.70956
Sox13	1:133382302-133424377	4.17615	2.87318	-0.539525	0.590831	0.2488	0.786336
Parn	16:13537963-13668170	5.13663	3.53423	-0.539424	1.05916	0.0968	0.605351
Atp5f1	3:105942697-105987423	61.7953	42.5187	-0.5394	0.604036	0.26775	0.798783
Slc35d1	4:103170648-103215164	2.0329	1.39891	-0.539242	0.849571	0.15175	0.693911
Rabep1	11:70844777-70969973	17.3605	11.9482	-0.53901	0.897894	0.1009	0.613461
Bex1	X:136213971-136226100	110.878	76.3232	-0.53878	1.05466	0.08095	0.572527
Kif13a	13:46749086-46929718	3.81167	2.62398	-0.538665	0.996809	0.0845	0.580805
Nkiras1	14:18267822-18331859	38.8934	26.7791	-0.538414	0.554	0.30625	0.823592
Gm13604	2:67565870-68122689	2.23095	1.53632	-0.538176	0.121647	0.79465	0.978491
Wdr19	5:65199695-65260415	1.64976	1.1361	-0.538164	0.763661	0.18045	0.72592
Fxyd2	9:45403137-45410278	4.13372	2.84671	-0.538146	0.465186	0.33555	0.841547
Atpaf1	4:115784811-115818828	19.402	13.362	-0.538069	0.596966	0.2386	0.778888
Cd200	16:45382134-45409053	85.1007	58.6243	-0.537672	0.353739	0.42735	0.88781
Fxn	19:24261452-24280605	1.63807	1.12848	-0.537612	0.531485	0.345	0.846428
Smarcd3	5:24586740-24602012	38.3336	26.412	-0.537418	0.310712	0.59555	0.941737
Med27	2:29346818-29524793	13.0431	8.98684	-0.537399	0.703805	0.16885	0.713593
Gm8615	5:149119564-149184063	9.36524	6.45457	-0.536995	0.594174	0.285	0.809525
Npepl1	2:174110348-174123070	3.33445	2.29861	-0.53669	0.787389	0.4754	0.906092
Itgb2	10:77530251-77565708	2.20694	1.52268	-0.535437	0.368687	0.46485	0.902484
Ccdc85c	12:108206344-108275417	13.1428	9.06979	-0.535134	1.05323	0.15385	0.696287
Fhl2	1:43123073-43196984	13.3964	9.2449	-0.535112	0.712018	0.30855	0.825103
Nop14	5:34638531-34660148	5.06493	3.49639	-0.534677	0.831878	0.12215	0.650736
mt-Tl1	MT:2675-2750	2475.09	1708.82	-0.53448	0.47993	0.34965	0.849095
Aig1	10:13647053-13868980	27.1137	18.7262	-0.533966	0.884205	0.10965	0.629922
Gm5943	X:114989149-114989608	3.07476	2.12552	-0.532657	0.456844	0.4108	0.880162
Pde8a	7:81213595-81334533	5.61618	3.88278	-0.532499	0.656851	0.22945	0.772428
Dynlt1b	17:6310546-6493180	4.03693	2.79116	-0.532392	0.181885	0.7874	0.977561
Trp53	11:69580358-69591873	11.4805	7.93819	-0.532304	0.5964	0.24095	0.780821
Gm16381	12:87644245-87644467	2.74785	1.90161	-0.531083	0.312411	0.6797	0.961096
Ankrd55	13:112288450-112384002	1.97688	1.36815	-0.531001	0.706399	0.1962	0.742363
Psme1	14:55578122-55585302	24.6714	17.0758	-0.530886	0.445375	0.42555	0.886982
Pqbp1	X:7894518-7899269	47.0301	32.5547	-0.530719	1.1362	0.08795	0.587936
Dpy19l4	4:11261314-11386783	4.82441	3.33964	-0.530662	0.48758	0.1965	0.742744
Gm20784	13:119962243-119963227	5.30286	3.67165	-0.530342	0.66188	0.21835	0.762851
Snord37	10:81176630-81182507	73.161	50.6629	-0.530143	0	1	1
Gpr149	3:62529076-62605140	1.844	1.27703	-0.530049	0.41194	0.37145	0.861103
Nfia	4:97568132-98118874	2.66581	1.8467	-0.529631	0.679936	0.1923	0.738624
Gm8923	2:175469984-175482171	1.63838	1.1351	-0.529448	0.278633	0.4672	0.903461
Gm9105	7:109279222-109444893	9.47167	6.56236	-0.529403	0.834295	0.1604	0.703737
Ccdc141	2:77009901-77170636	7.81143	5.41218	-0.529376	0.445072	0.42015	0.884434
Zc3h13	14:75284372-75344426	9.53823	6.60957	-0.529165	1.00803	0.0864	0.584645
Stk3	15:34875495-35155806	3.70818	2.56997	-0.528962	0.639293	0.21745	0.762127
Pinx1	14:63860311-63919859	2.85064	1.97625	-0.52852	0.706178	0.2538	0.789861
Cdh11	8:102632994-102785111	12.006	8.32524	-0.528189	1.00405	0.0884	0.588793
Vti1b	12:79130776-79172667	91.1653	63.2245	-0.528001	0.723702	0.15995	0.703157
Glis2	16:4594712-4624988	8.23298	5.70974	-0.527991	0.417304	0.41015	0.879907
Zfp748	13:67538640-67553138	2.16615	1.50259	-0.527686	0.58152	0.1949	0.741154
Gm8880	X:88959216-88959670	16.3905	11.3706	-0.52755	0.624334	0.27135	0.801004
C130074G19Rik	1:184871925-184883218	30.3669	21.0714	-0.527211	1.11279	0.07095	0.546252
Sept1	7:127214446-127218498	1.93112	1.34038	-0.526798	0.372229	0.421	0.884788
Smc6	12:11265885-11319785	2.65781	1.8452	-0.526462	0.928219	0.10595	0.623338
Zdhhc15	X:104536968-104671064	1.60419	1.11373	-0.526442	0.744198	0.1722	0.71713
Bud31	5:145140361-145167108	17.0184	11.8173	-0.526202	0.427345	0.50475	0.91575
Prdx1	4:116685543-116700822	21.5111	14.9448	-0.525437	0.836331	0.1462	0.68611
RP23-330G24.3	X:152294827-152296304	4.43663	3.08278	-0.525233	0.727764	0.2121	0.75762
Snca	6:60731572-60829855	86.5807	60.1752	-0.524878	1.09589	0.07685	0.562642
Cwc27	13:104631139-104839274	3.18567	2.21436	-0.52471	0.392415	0.3565	0.853064
Armcx4	X:134686518-134696757	10.5393	7.32944	-0.524003	1.02947	0.0746	0.556211
Lrif1	3:106684986-106736577	5.75974	4.00625	-0.523751	0.723252	0.20575	0.751968
AC098736.2	1:19063299-19166346	5.71502	3.97578	-0.523521	0.543133	0.33335	0.840419
Gm28778,Ormdl1,Osgepl1	1:53297094-53352752	6.12098	4.2594	-0.523113	0.495226	0.47805	0.906881
Rpp40	13:35893471-35906359	2.81354	1.95827	-0.522806	0.255413	0.7056	0.965679
Fyttd1	16:32821702-32908963	17.3789	12.1033	-0.521937	0.286908	0.4341	0.891
Sltm	9:70542919-70592237	7.77858	5.41797	-0.521756	0.983001	0.0856	0.582958
Pdcd4	19:53892230-54033268	13.329	9.29536	-0.519984	0.672957	0.31405	0.828645
Plcb3	19:6953713-6969759	2.32677	1.62294	-0.519718	0.841043	0.13545	0.670532
2610005L07Rik	8:20262612-20424814	7.56441	5.2778	-0.519291	0.47158	0.4328	0.890328
Mrps7	11:115584254-115612969	21.5818	15.0587	-0.519222	0.362178	0.45085	0.897596
Gm12960	4:111719983-111829184	6.98748	4.87556	-0.519205	0.605323	0.261	0.793794
Snx5	2:144250122-144281227	14.4061	10.0535	-0.518988	0.60401	0.12105	0.64879
Gm10704	3:88575875-88588419	41.1456	28.724	-0.518482	0.702242	0.25265	0.788996
Iqcb1	16:36792883-36875003	10.4987	7.32934	-0.51846	0.492076	0.3809	0.865914
Gm13882	2:104143072-104410334	5.61739	3.92387	-0.517623	0.149141	0.80455	0.979923
Agtrap	4:148077060-148088031	5.97344	4.17283	-0.517534	0.218507	0.40775	0.878639
Mpeg1	19:12460778-12465284	10.5079	7.34109	-0.517408	0.913826	0.10115	0.614129
Zfp472	17:32965813-32979233	1.63652	1.14336	-0.517354	0.61407	0.2336	0.775409
Timp3	10:86055124-86498896	28.5815	19.9753	-0.516863	0.992039	0.0967	0.605081
Pcsk7	9:45838579-45936058	5.11355	3.57463	-0.516532	0.285979	0.61475	0.946332
Arhgap5	12:52516076-52567852	14.7584	10.3171	-0.516496	0.989721	0.08275	0.576571
Sept2	1:93478963-93510260	8.79824	6.15505	-0.515444	0.523945	0.2683	0.799062
Armcx1	X:134717962-134721917	36.6972	25.6732	-0.515403	0.766331	0.09235	0.596355
Inpp5k	11:75630987-75648871	13.4085	9.38202	-0.515177	0.778264	0.11	0.630718
Gm6195	1:9798106-9900845	4.5244	3.16625	-0.514952	0.219571	0.70685	0.965857
Echdc1	10:29313165-29362442	8.71695	6.10288	-0.514335	0.397584	0.5235	0.921771
Cdc16	8:13757675-13781938	17.3242	12.1316	-0.514019	0.808844	0.1745	0.71968
Bcas2	3:103171654-103179166	28.6351	20.0544	-0.513866	0.748382	0.1782	0.723703
Gm17634	1:105276913-105361737	2.10627	1.47534	-0.513644	0.140746	0.7345	0.970129
Gm13772	2:90782726-90834437	42.0968	29.4878	-0.513593	0.600034	0.28455	0.809332
Gnpda2	5:69556923-69592337	4.74337	3.3233	-0.513296	0.395551	0.3761	0.863445
Ntn1	11:68209363-68400823	4.91042	3.44053	-0.513217	0.86374	0.10965	0.629922
Notch1	2:26445695-26516663	6.37055	4.46404	-0.513069	0.229331	0.3223	0.833495
Nes	3:87971077-87980451	2.47058	1.73134	-0.512964	0.781734	0.145	0.68427
RP24-426M1.4	1:4905750-4906861	1.46986	1.03025	-0.512685	0.382323	0.4123	0.880879
Nucks1	1:131910533-131936321	8.94596	6.27133	-0.512465	1.49461	0.11925	0.646168
Dbnl	11:5788487-5800962	13.7626	9.64837	-0.512395	1.00942	0.10745	0.62633
Grk6	13:55445333-55460925	21.1208	14.8127	-0.511823	1.02274	0.0907	0.593297
Rnf7	9:96470936-96478675	39.1185	27.4368	-0.511737	0.8623	0.1064	0.624094
Rbpsuh-rs3	6:45060060-47301369	7.4981	5.26265	-0.510735	0.371953	0.5505	0.930123
Gm6222	X:103697413-103821965	12.6228	8.85964	-0.510714	0.258023	0.7137	0.966827
Gm12344	11:77089914-77188968	11.1518	7.82961	-0.510267	0.217168	0.73595	0.970401
Rpl22	4:152325741-152334071	91.2014	64.0471	-0.509921	0.479692	0.4038	0.876695
Gm8394	10:85313487-85314439	27.8005	19.5233	-0.509908	0.919972	0.1178	0.643815
Pdik1l	4:134275001-134287895	4.50342	3.16295	-0.509752	0.496452	0.4285	0.888446
Aacs	5:125475813-125517412	10.834	7.60951	-0.509685	0.815877	0.0998	0.6112
Tubb4b-ps1	5:7179364-7180699	57.2988	40.2456	-0.509673	1.75559	0.0955	0.602631
Kank4	4:98754897-98817537	4.47539	3.14345	-0.509664	0.522882	0.3354	0.841449
Gfra1	19:58204138-58455909	24.8535	17.4603	-0.509367	0.439738	0.17975	0.725327
Gm10222,Gm28439	1:24611534-24612700	7129.33	5009.51	-0.509096	0.490373	0.43705	0.892215
Ttll7	3:146852366-146984009	45.316	31.8421	-0.509087	0.954351	0.1102	0.630903
Mgll	6:88716423-88828360	84.865	59.6326	-0.509068	0.769432	0.1026	0.616577
Hyi	4:118359989-118409273	3.23629	2.27486	-0.508563	0.174138	0.6863	0.962433
Zfand1	3:10339952-10351317	6.72064	4.72572	-0.508065	0.606913	0.24335	0.78261
Golga1	2:39016260-39065541	6.44845	4.53443	-0.50803	0.481819	0.2707	0.800681
Gm12166	11:46051353-46052321	18.5359	13.0361	-0.507802	0.944356	0.14235	0.680248
Gm2061	1:185447115-185468762	1.55092	1.09086	-0.507649	0.308091	0.59295	0.941116
Ppm1d	11:85311243-85347066	4.07855	2.86875	-0.507632	0.849452	0.14215	0.679973
Usp14	18:9958179-10045119	19.4083	13.6532	-0.507441	0.784506	0.11945	0.646405
Notch4	17:34564267-34588503	2.23707	1.57404	-0.507139	0.318347	0.3596	0.85451
Ptbp2	3:119718741-119783388	8.23945	5.79807	-0.506975	1.52196	0.11355	0.636741
Mak16	8:31150315-31168724	8.3695	5.89055	-0.506738	0.575497	0.30945	0.825532
Rps25	9:44407713-44418003	81.348	57.256	-0.50668	0.912045	0.1453	0.684732
Fads1	19:10182887-10196870	58.2986	41.0525	-0.505992	1.5582	0.09105	0.593845
Gm11642	11:103723949-103724532	3.36537	2.37016	-0.505782	0.440209	0.4147	0.882108
E2f5	3:14578640-14611285	2.23681	1.57536	-0.505759	0.408776	0.39945	0.874685
Arl3	19:46531108-46573085	101.236	71.303	-0.505692	1.06342	0.09765	0.607111
Lor	3:92080270-92083142	8.67521	6.11028	-0.505661	1.14187	0.22855	0.771761
Sned1	1:93235840-93305915	2.01604	1.4207	-0.504918	0.233284	0.45445	0.898717
Ap4b1	3:103809519-103822025	5.59739	3.94597	-0.504375	0.766816	0.15485	0.697315
Psip1	4:83417723-83486459	41.274	29.0987	-0.504278	0.703123	0.19845	0.744639
Rnmt	18:68300354-68324852	27.338	19.2752	-0.504163	0.507945	0.33505	0.841216
Jak2	19:29251827-29313080	4.94405	3.48704	-0.50369	0.857009	0.1321	0.665574
Chmp3	6:71543796-71582609	52.1928	36.8178	-0.503447	0.470786	0.3146	0.82887
Gm3671	9:75693652-75694659	1.90921	1.34692	-0.503306	0.484878	0.37575	0.863237
Grhl1	12:24572286-24617391	2.83184	1.99796	-0.503212	0.792451	0.17195	0.716922
Mmd	11:90187683-90278589	63.3559	44.7034	-0.503094	0.962654	0.0963	0.604272
Kif16b	2:142617473-142901531	2.60057	1.83499	-0.503061	0.651023	0.2466	0.784887
Gm5578	6:112605543-112606779	24.5448	17.3287	-0.502249	0.970879	0.11405	0.637635
5730455P16Rik	11:80360491-80378034	16.2552	11.4792	-0.501884	0.661354	0.102	0.6155
Akap12	10:4266328-4359468	6.8126	4.81115	-0.501825	1.09909	0.0858	0.583307
Gcc1	6:28416090-28438622	9.52709	6.72858	-0.501735	0.313862	0.42575	0.887067
Gm8258	5:104775778-104777227	3.17514	2.24252	-0.501699	0.719294	0.26675	0.797978
Gm24100	7:59598903-59598982	20.2059	14.2744	-0.501345	0	1	1
Scp2-ps2	9:123307507-123307939	120.821	85.3697	-0.501081	0.898606	0.1131	0.635709
Usp47	7:112023505-112111386	9.69378	6.85001	-0.500953	0.989437	0.0866	0.585043
Faf1	4:109676587-109963960	3.81956	2.70042	-0.500224	0.784425	0.1619	0.705765
Gm5903	7:130162450-133124354	4.96948	3.51386	-0.500039	0.11574	0.73595	0.970401
Gper1	5:139359738-139460502	2.54662	1.80102	-0.499776	0.318682	0.53265	0.924727
Rassf1	9:107551554-107572779	9.43776	6.67739	-0.49916	0.330958	0.5618	0.933185
Ppp2r3a	9:101105083-101251795	7.91703	5.60228	-0.498945	0.687254	0.16745	0.711882
Prg4	1:150361304-150466165	2.74401	1.94209	-0.498672	0.190577	0.6415	0.952655
Vangl2	1:172000959-172028444	3.16775	2.24225	-0.498509	0.579085	0.29615	0.816751
Clcc1	3:108653912-108722309	8.01898	5.67862	-0.497877	0.550275	0.19945	0.745659
1700088E04Rik	15:79108971-79141253	5.17034	3.66347	-0.497049	0.173688	0.5763	0.937159
[truncated: 13,108 more rows]

## Sheet: KO_AL_vs_WT_DR Adipose
gene	locus	WT_DR Adipose FPKM	KO_AL Adipose FPKM	log2(fold_change)	test_stat	p_value	q_value
[truncated: 13,546 more rows]
